# Supplementary material for: Identification of a core TP53 transcriptional program with highly distributed tumor suppressive activity
Source: PubMed Central journal article supplement — Genome Res. 2017 Oct;27(10):1645–57. doi: 10.1101/gr.220533.117 (PMC5630028; doi:10.1101/gr.220533.117), 2017-10
Supplement: supp_gr.220533.117_Supplemental_FigureS1.pdf [file supp_gr.220533.117_Supplemental_FigureS1.pdf]

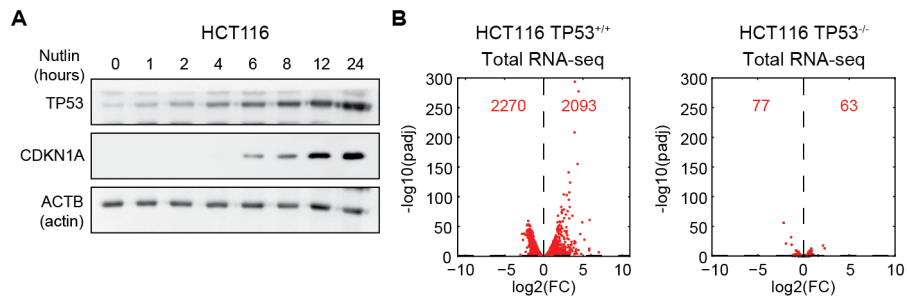

**Figure S1 related to Figure 1. Nutlin effects on gene expression are TP53-dependent.**

(A) Western blot showing time course of TP53 and CDKN1A (p21) protein accumulation in Nutlin-treated HCT116 cells.

(B) Volcano plots of the differentially expressed genes as detected by RNA-seq in TP53<sup>+/+</sup> and TP53<sup>-/-</sup> HCT116 cells treated with 10  $\mu$ M Nutlin for 12 hours. Statistics: DESeq2, genes with p(adj) < 0.05 are labeled in red. FC: fold change.
