# Supplementary material for: Identification of a core TP53 transcriptional program with highly distributed tumor suppressive activity
Source: PubMed Central journal article supplement — Genome Res. 2017 Oct;27(10):1645–57. doi: 10.1101/gr.220533.117 (PMC5630028; doi:10.1101/gr.220533.117), 2017-10
Supplement: supp_gr.220533.117_Supplemental_FigureS3.pdf [file supp_gr.220533.117_Supplemental_FigureS3.pdf]

**A**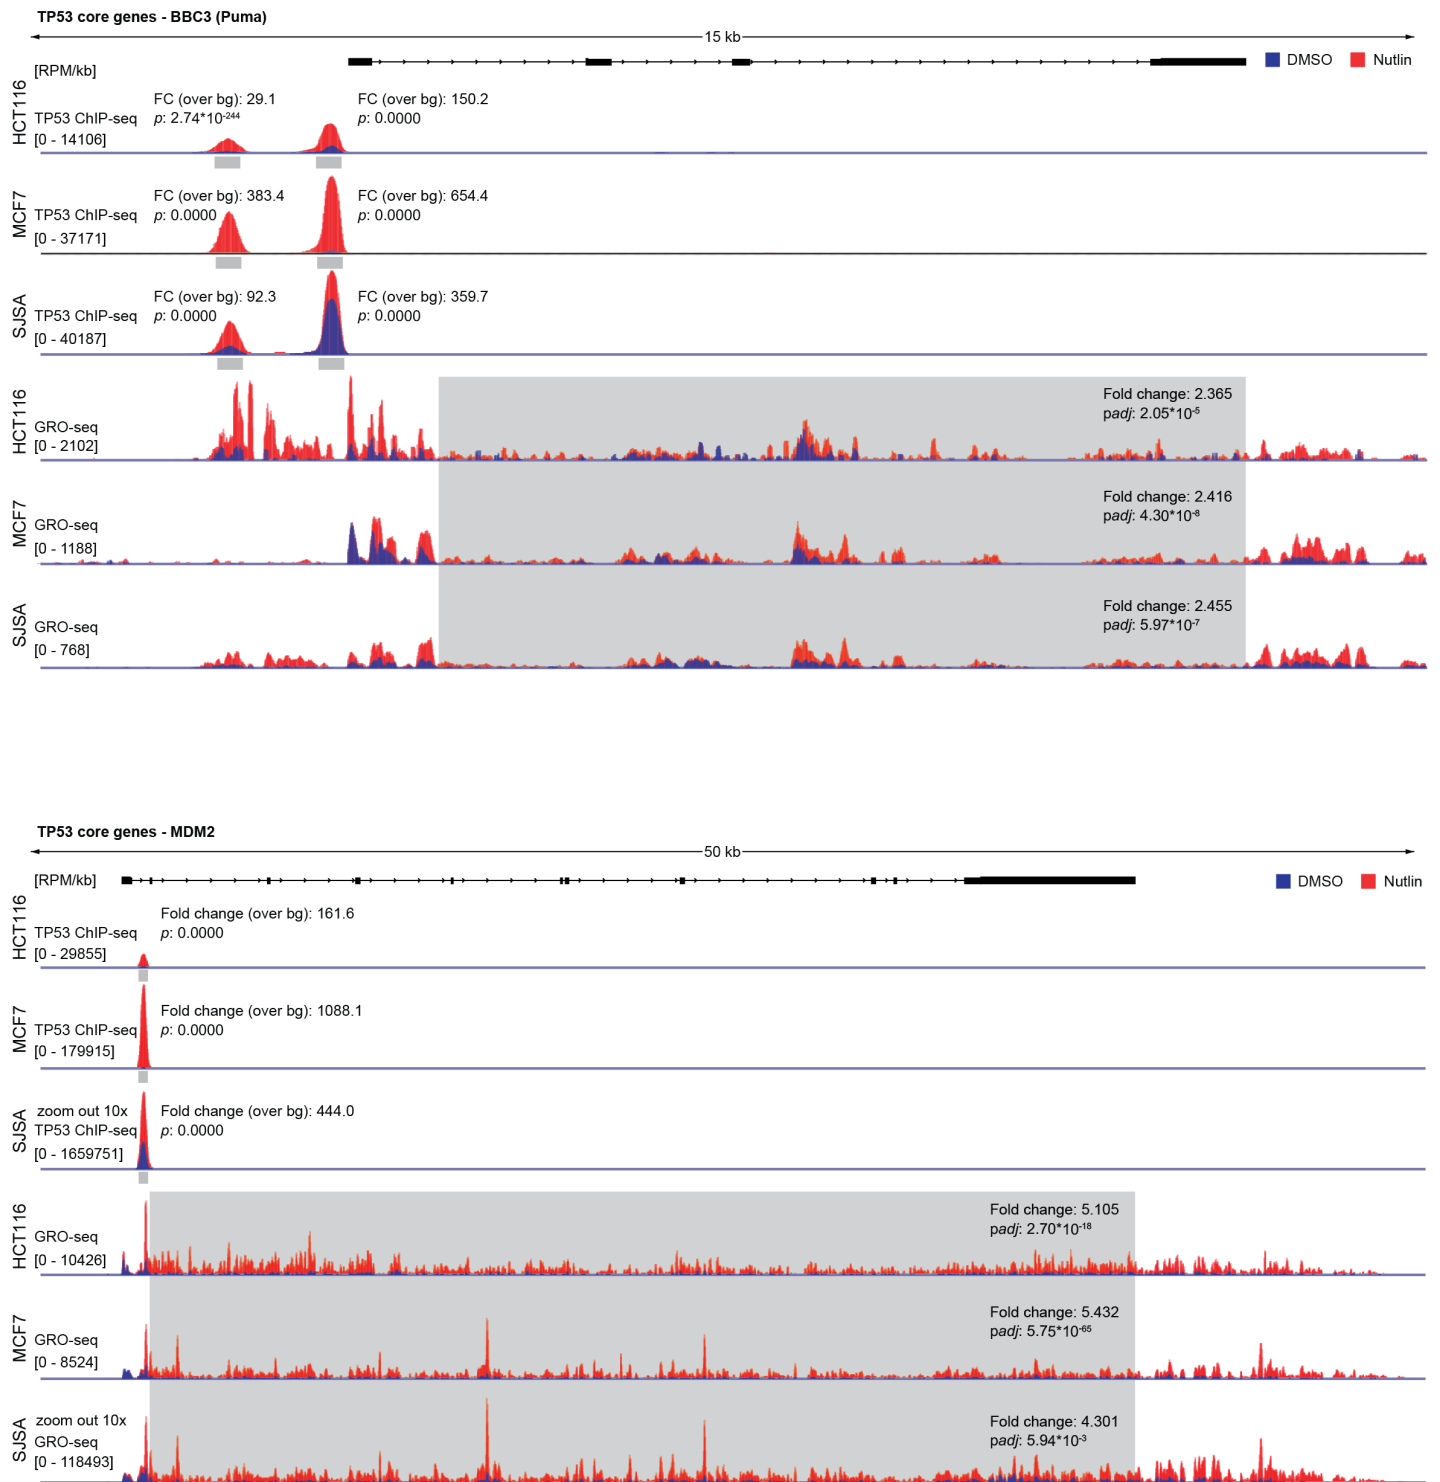**Figure S3** (continued on next page, legend follows).

**B**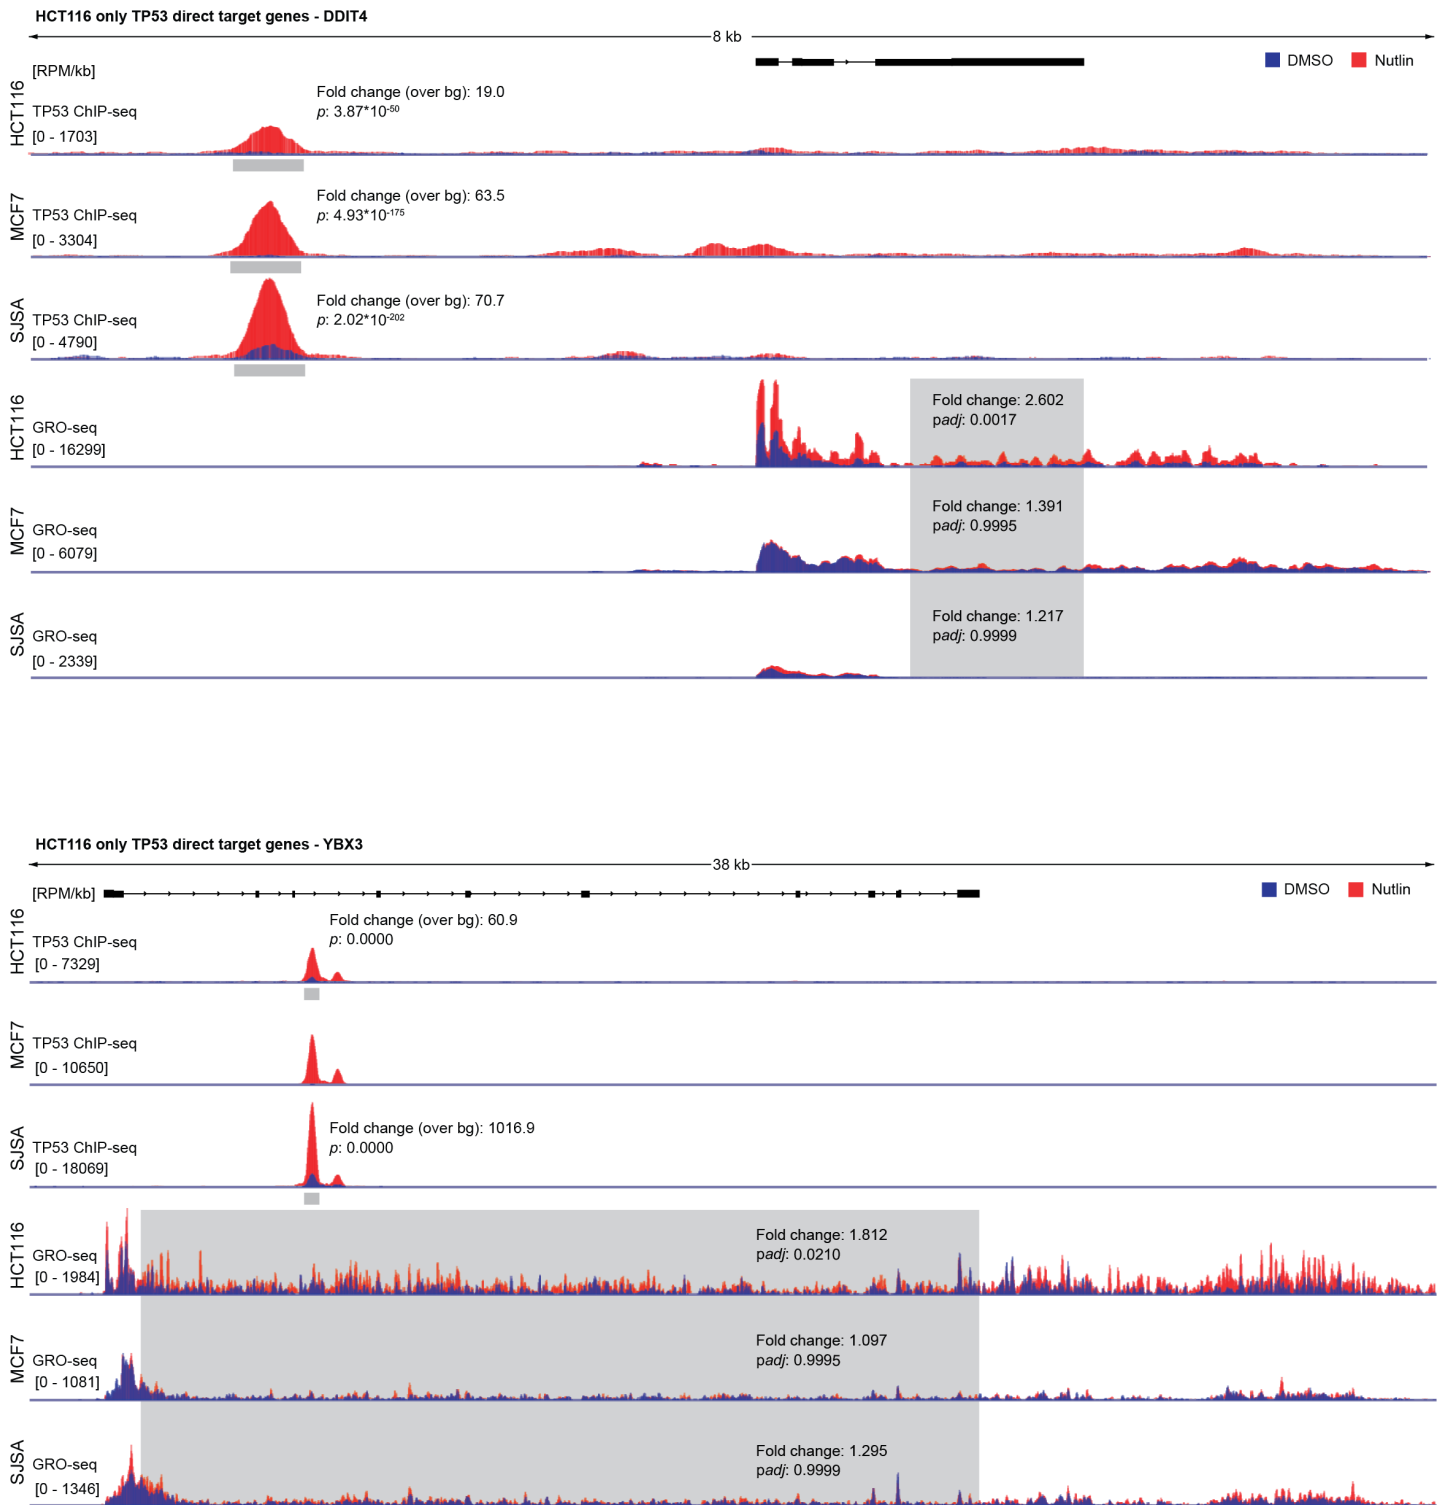

**Figure S3** (continued on next page, legend follows).

**C**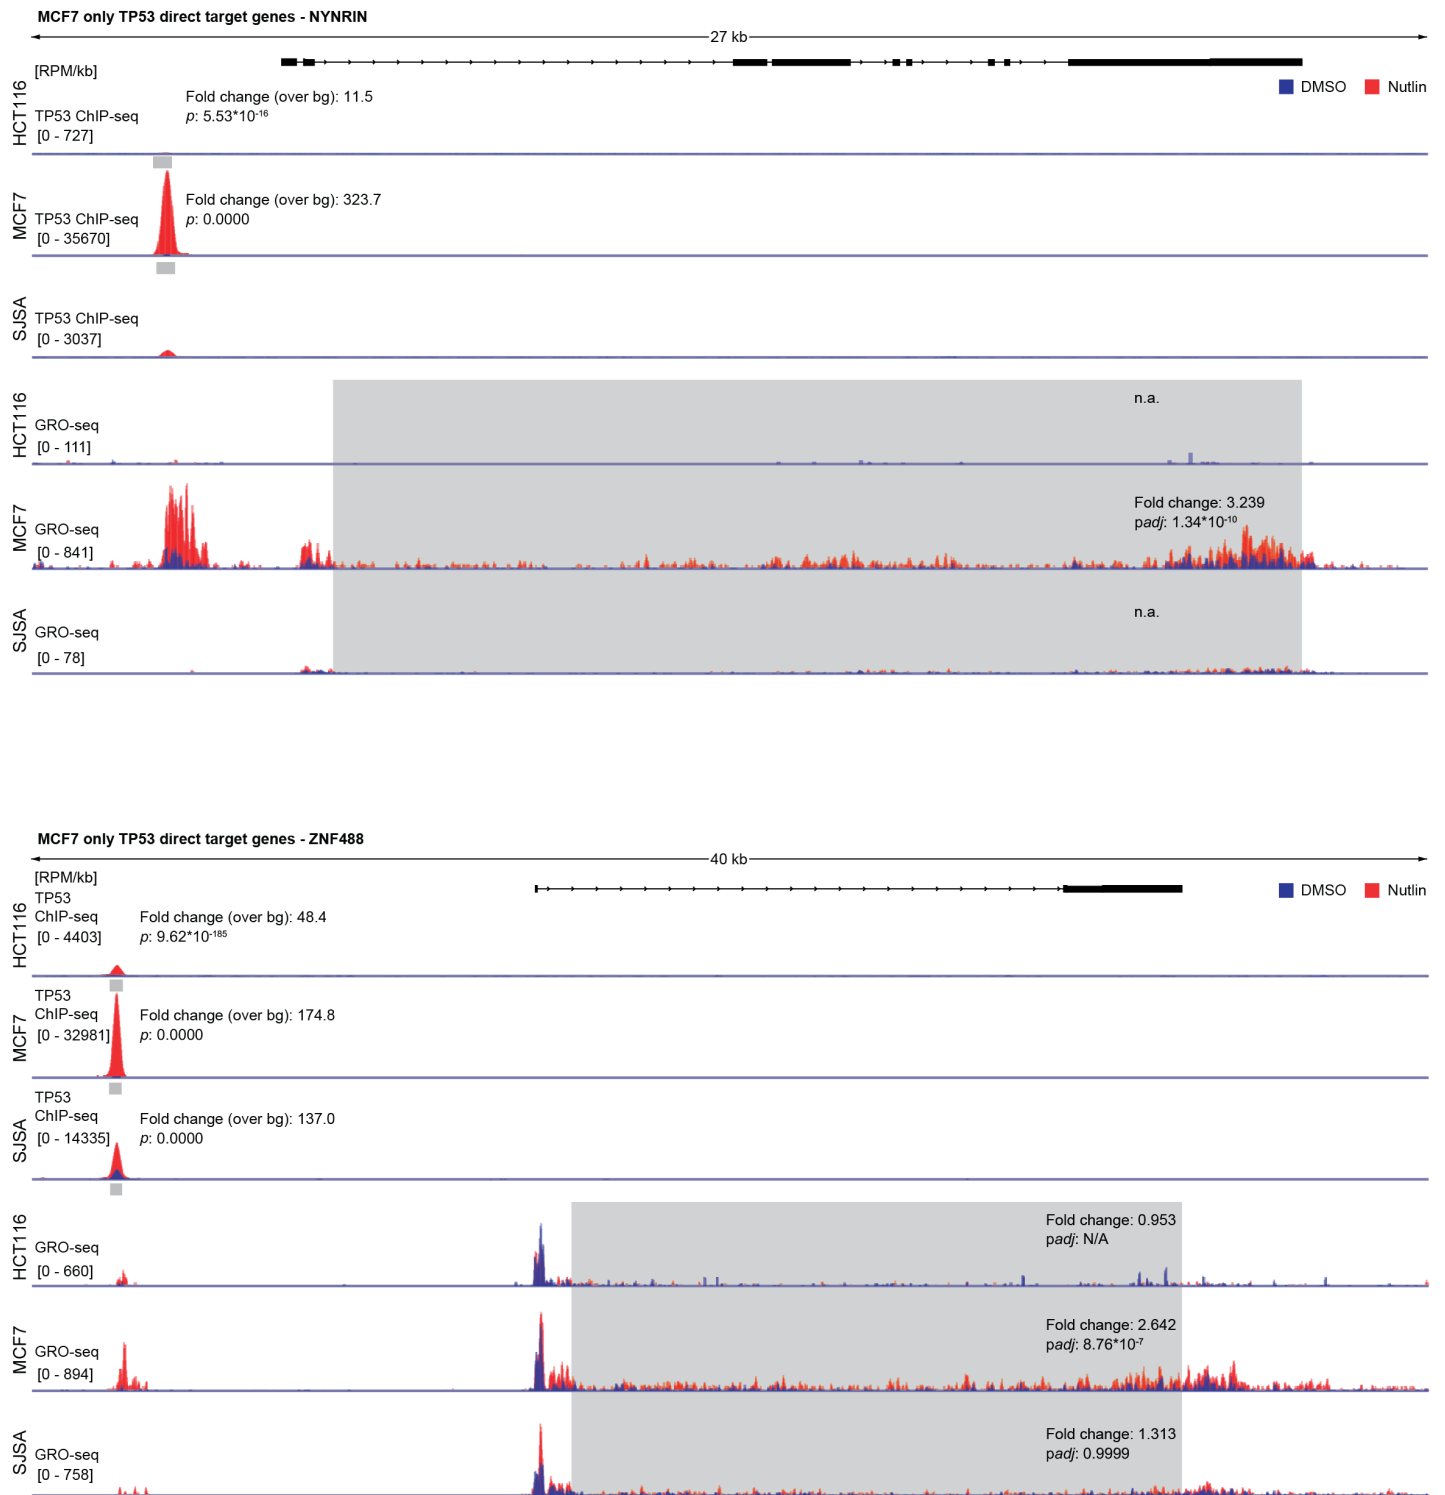**Figure S3** (continued on next page, legend follows).

**D**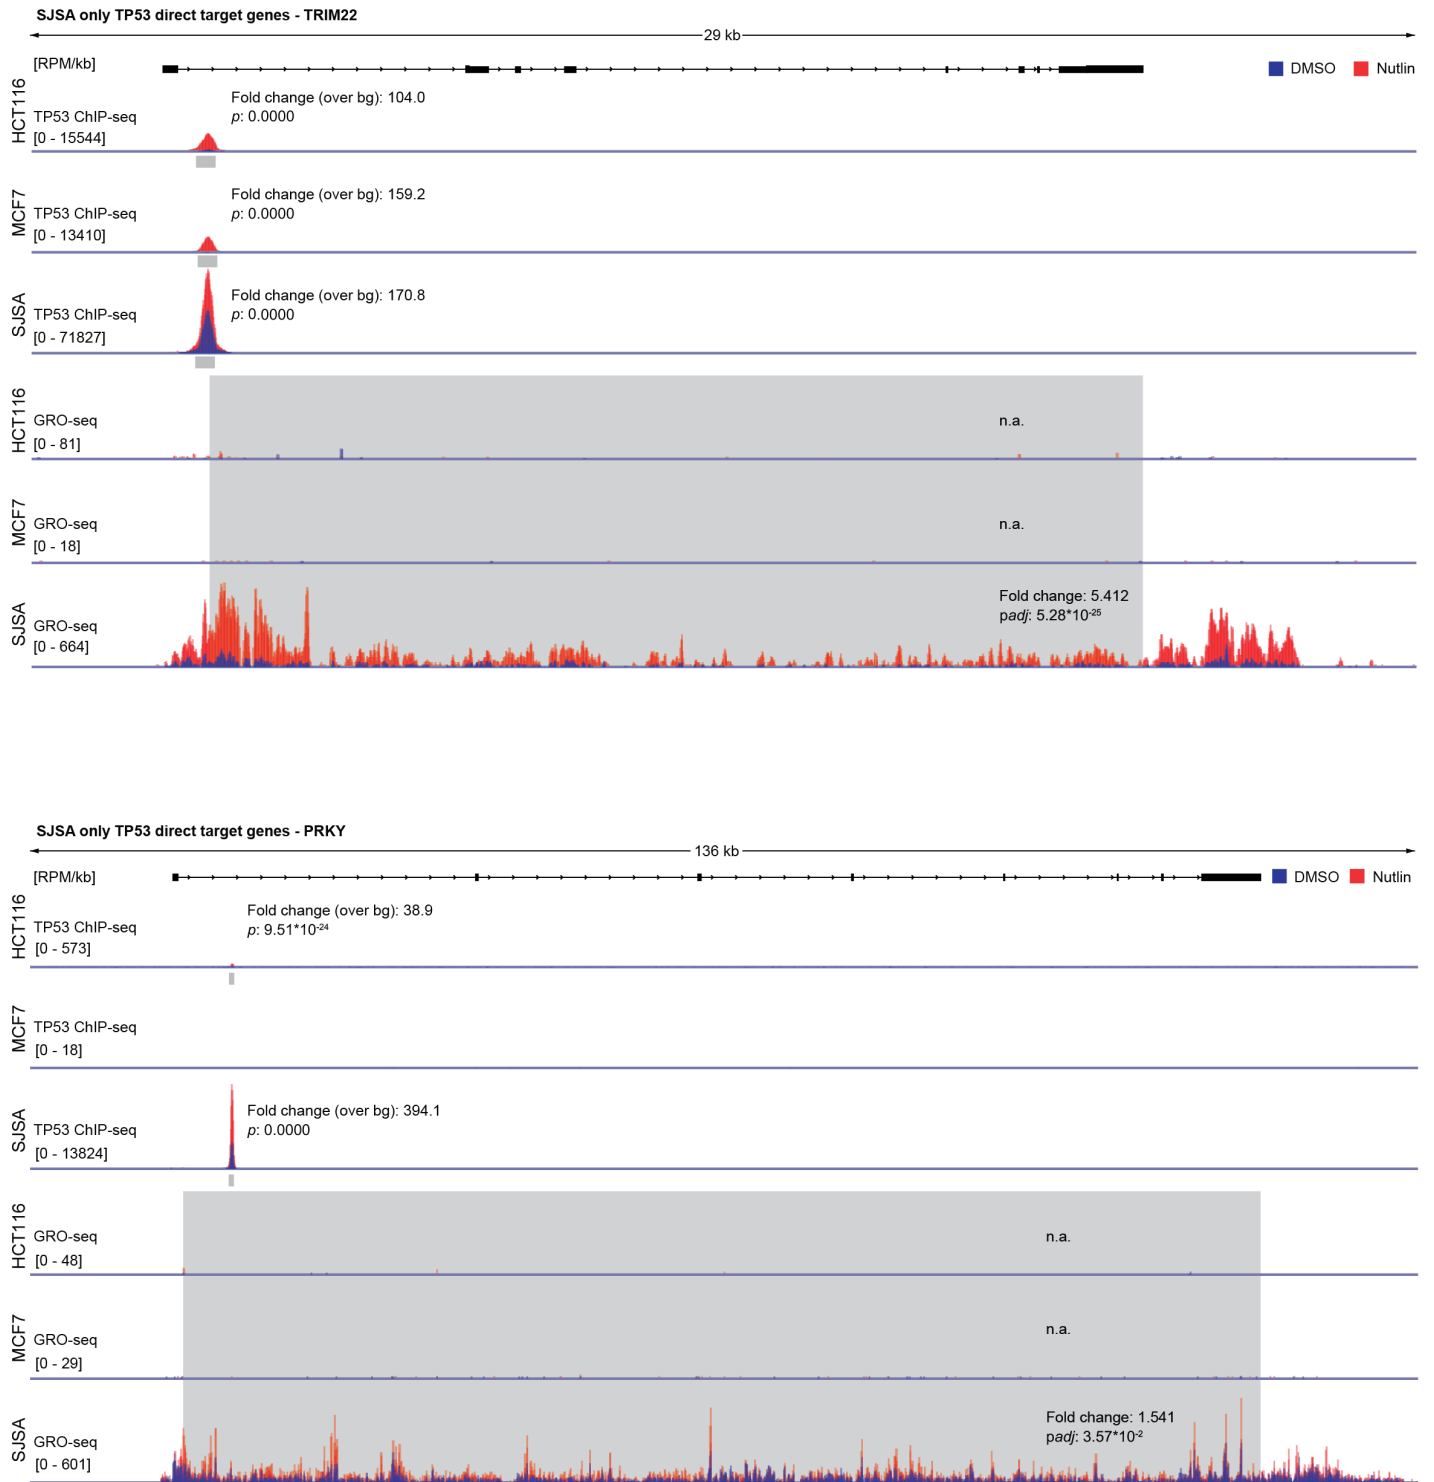**Figure S3** (legend on next page).

**Figure S3 related to Figure 2.**

Genome browser tracks show TP53 ChIP-seq and GRO-seq reads in HCT116, MCF7, and SJSA cell lines. Panels depict examples of genes activated by Nutlin either in all cell lines (A) or in a cell type-specific fashion (B-D). Grey boxes below the TP53 ChIP-seq tracks mark positions of TP53 peaks identified by Homer. Associated fold changes and p values were calculated by Homer findPeaks. Large grey boxes over the GRO-seq tracks show the gene body area (from TSS +1kb to TTS) used to compare read densities from DMSO- and Nutlin-treated samples by DESeq2. n.a. denotes transcriptionally inactive genes as determined by FStitch.
