# Supplementary material for: Identification of a core TP53 transcriptional program with highly distributed tumor suppressive activity
Source: PubMed Central journal article supplement — Genome Res. 2017 Oct;27(10):1645–57. doi: 10.1101/gr.220533.117 (PMC5630028; doi:10.1101/gr.220533.117), 2017-10
Supplement: supp_gr.220533.117_Supplemental_FigureS4.pdf [file supp_gr.220533.117_Supplemental_FigureS4.pdf]

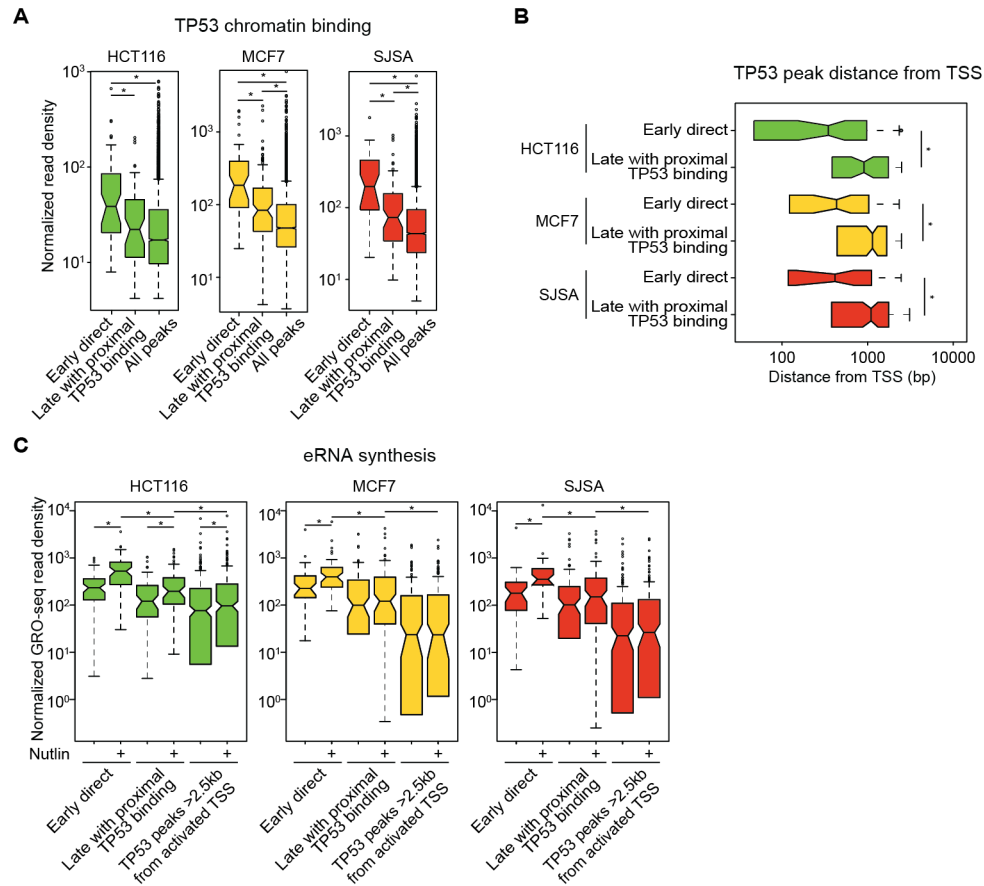

**Figure S4 related to Figure 3. Early direct targets bind more TP53 and produce more eRNAs.**

(A) Box and whisker plot of normalized ChIP-seq read densities for TP53 peaks associated with genes in the indicated categories (25 kb from TSS). Statistics: Mann-Whitney U test,  $p < 0.01$ .

(B) Box and whisker plot showing the distance of TP53 peaks from TSS of associated genes from the early direct response and late direct response categories. We analyzed only peaks within 2.5 kb from TSS. Statistics: Mann-Whitney U test,  $p < 0.01$ .

(C) Box and whisker plot of GRO-seq signals within 2.5 kb of the TP53 peaks in HCT116, MCF7 and SJSA cells treated either with DMSO or Nutlin. Statistics: Mann-Whitney U test,  $p < 0.01$ .

(D) Metagene profiles and box and whisker plots of DNaseI sensitivity, H3K4 trimethylation and H3K36 trimethylation at early and late direct response genes loci. Statistics: Mann-Whitney U test,  $p < 0.01$ .
