# Supplementary material for: Identification of a core TP53 transcriptional program with highly distributed tumor suppressive activity
Source: PubMed Central journal article supplement — Genome Res. 2017 Oct;27(10):1645–57. doi: 10.1101/gr.220533.117 (PMC5630028; doi:10.1101/gr.220533.117), 2017-10
Supplement: supp_gr.220533.117_Supplemental_TableS1.pdf [file supp_gr.220533.117_Supplemental_TableS1.pdf]

**Supplemental Table S1.** Mutational spectra of HCT116, MCF7 and SJSa cells. Only mutations with known oncogenic potential are listed. Data from Cancer Cell Line Encyclopedia were compared with a list of known oncogenic drivers (Rubio-Perez et al. 2015) and key TP53-related mutations previously reported \*(Tovar et al. 2006); \*(Burri et al. 2001)).

|                                               | HCT116 | MCF7 | SJSa |
|-----------------------------------------------|--------|------|------|
| Gene mutations (CCLE)                         | 359    | 52   | 114  |
| Mutations of oncogenic driver genes (Intogen) | 57     | 8    | 22   |
| MDM2*                                         |        |      | mut. |
| CDKN2A**                                      | mut.   |      |      |
| PIK3CA                                        | mut.   | mut. |      |
| KRAS                                          | mut.   | mut. |      |
| PTEN                                          | mut.   |      |      |
| MLL3                                          | mut.   |      |      |
| NF1                                           | mut.   |      |      |
| ROBO2                                         | mut.   |      | mut. |
| KALRN                                         | mut.   |      | mut. |
| ATRX                                          | mut.   |      |      |
| AKAP9                                         | mut.   |      | mut. |
| PIK3R1                                        | mut.   |      | mut. |
| IDH1                                          | mut.   |      |      |
| MECOM                                         | mut.   | mut. |      |
| BRCA2                                         | mut.   |      | mut. |
| CTNNB1                                        | mut.   |      |      |
| NOTCH2                                        |        |      | mut. |
| FN1                                           | mut.   |      |      |
| MYH11                                         | mut.   |      | mut. |
| WNK1                                          | mut.   |      |      |
| ACACA                                         | mut.   |      |      |
| MAP3K1                                        | mut.   | mut. | mut. |
| MYH9                                          |        | mut. |      |
| FLT3                                          | mut.   |      |      |
| SPTAN1                                        | mut.   |      |      |
| EP300                                         | mut.   |      | mut. |
| CDH1                                          | mut.   |      |      |
| GNAS                                          | mut.   |      |      |
| HGF                                           | mut.   |      |      |
| ARFGF1                                        | mut.   |      |      |
| COL1A1                                        | mut.   |      |      |
| CHD8                                          | mut.   |      |      |
| ERBB3                                         | mut.   |      | mut. |
| BCL11A                                        | mut.   |      |      |
| FGFR2                                         | mut.   |      |      |
| CHD9                                          | mut.   |      |      |
| KDM6A                                         | mut.   |      |      |
| MYH10                                         |        |      | mut. |
| MET                                           | mut.   | mut. |      |
| USP6                                          |        |      | mut. |
| ARHGAP29                                      | mut.   |      |      |
| DICER1                                        | mut.   |      |      |
| LRP6                                          | mut.   |      |      |
| MLLT4                                         | mut.   |      |      |
| EIF4G1                                        |        |      | mut. |
| CDK12                                         | mut.   |      |      |
| MKL1                                          | mut.   |      | mut. |
| MAP3K4                                        |        | mut. | mut. |
| MLH1                                          | mut.   |      |      |
| SOS1                                          |        | mut. | mut. |

|          |      |  |      |
|----------|------|--|------|
| AFF4     | mut. |  |      |
| PGR      | mut. |  |      |
| TGFBR2   | mut. |  |      |
| RHOA     |      |  | mut. |
| FOXP1    | mut. |  | mut. |
| PLCG1    | mut. |  |      |
| RFC4     |      |  | mut. |
| FGFR1    | mut. |  |      |
| CHEK2    | mut. |  |      |
| ZMYM2    | mut. |  |      |
| RPL22    | mut. |  |      |
| CASP1    | mut. |  |      |
| CDC73    |      |  | mut. |
| BMPR2    | mut. |  |      |
| ACVR2A   | mut. |  |      |
| FGFR3    |      |  | mut. |
| SMO      | mut. |  |      |
| LCP1     | mut. |  |      |
| HSP90AA1 |      |  | mut. |
| ADAM10   | mut. |  |      |
| ATIC     | mut. |  |      |
