# Supplementary material for: Identification of a core TP53 transcriptional program with highly distributed tumor suppressive activity
Source: PubMed Central journal article supplement — Genome Res. 2017 Oct;27(10):1645–57. doi: 10.1101/gr.220533.117 (PMC5630028; doi:10.1101/gr.220533.117), 2017-10
Supplement: supp_gr.220533.117_Supplemental_TableS2.pdf [file supp_gr.220533.117_Supplemental_TableS2.pdf]

**Supplemental Table S2.** Motif frequency in TP53 ChIP-seq peaks.

| HCT116   |          |                  |           |
|----------|----------|------------------|-----------|
| Motif    | Observed | Background freq. | P-value   |
| p53      | 83.27%   | 1.06%            | 1e-8213   |
| p63      | 86.71%   | 3.85%            | 1e-6003   |
| p53(mES) | 16.18%   | 0.24%            | 1e-1326   |
| Tcfcp2l1 | 6.44%    | 0.91%            | 1.00E-180 |
| TEAD4    | 18.23%   | 8.02%            | 1.00E-133 |
| Smad4    | 24.28%   | 14.85%           | 1.00E-76  |
| BMAL1    | 30.81%   | 20.79%           | 1.00E-69  |
| Fox:Ebox | 16.11%   | 9.90%            | 1.00E-47  |
| Foxa2    | 13.45%   | 7.89%            | 1.00E-45  |
| THRa     | 11.81%   | 6.85%            | 1.00E-40  |
| MCF7     |          |                  |           |
| Motif    | Observed | Background freq. | P-value   |
| p53      | 81.46%   | 1.10%            | 1e-8897   |
| p63      | 82.57%   | 3.98%            | 1e-6136   |
| p53(mES) | 16.75%   | 0.28%            | 1e-1488   |
| Tcfcp2l1 | 7.16%    | 0.99%            | 1.00E-229 |
| TEAD4    | 18.62%   | 8.48%            | 1.00E-143 |
| Smad4    | 24.78%   | 14.97%           | 1.00E-92  |
| Fox:Ebox | 18.28%   | 10.21%           | 1.00E-83  |
| Foxa2    | 14.79%   | 8.35%            | 1.00E-63  |
| Smad3    | 38.92%   | 29.36%           | 1.00E-59  |
| GRHL2    | 7.50%    | 3.34%            | 1.00E-56  |
| SJSA     |          |                  |           |
| Motif    | Observed | Background freq. | P-value   |
| p53      | 87.31%   | 0.95%            | 1e-8743   |
| p63      | 89.10%   | 3.73%            | 1e-6134   |
| p53(mES) | 15.96%   | 0.27%            | 1e-1203   |
| Tcfcp2l1 | 7.01%    | 0.92%            | 1.00E-199 |
| TEAD4    | 19.00%   | 8.51%            | 1.00E-129 |
| Smad4    | 24.12%   | 14.68%           | 1.00E-74  |
| BMAL1    | 31.82%   | 21.37%           | 1.00E-71  |
| Foxa2    | 14.99%   | 8.07%            | 1.00E-63  |
| Fox:Ebox | 16.98%   | 9.60%            | 1.00E-63  |
| AP-1     | 11.96%   | 6.67%            | 1.00E-45  |
