# Supplementary material for: Identification of a core TP53 transcriptional program with highly distributed tumor suppressive activity
Source: PubMed Central journal article supplement — Genome Res. 2017 Oct;27(10):1645–57. doi: 10.1101/gr.220533.117 (PMC5630028; doi:10.1101/gr.220533.117), 2017-10
Supplement: supp_gr.220533.117_Supplemental_TableS3.pdf [file supp_gr.220533.117_Supplemental_TableS3.pdf]

**Supplemental Table S3.** ENCODE data files used in the study. All files are available through [encodeproject.org](http://encodeproject.org).

| Cell line | ChIP-seq target | DCC accession | Laboratory                  |
|-----------|-----------------|---------------|-----------------------------|
| HCT116    | CEBPB           | ENCFF000OYS   | Richard Myers, HAIB         |
| HCT116    | CEBPB           | ENCFF000OYU   | Richard Myers, HAIB         |
| MCF7      | CEBPB           | ENCFF000QLL   | Richard Myers, HAIB         |
| MCF7      | CEBPB           | ENCFF000QLO   | Richard Myers, HAIB         |
| HCT116    | JUND            | ENCFF000PAH   | Richard Myers, HAIB         |
| HCT116    | JUND            | ENCFF000PAI   | Richard Myers, HAIB         |
| MCF7      | JUND            | ENCFF000QOB   | Richard Myers, HAIB         |
| MCF7      | JUND            | ENCFF000QOD   | Richard Myers, HAIB         |
| HCT116    | MAX             | ENCFF000PAP   | Richard Myers, HAIB         |
| HCT116    | MAX             | ENCFF000PAQ   | Richard Myers, HAIB         |
| MCF7      | MAX             | ENCFF000QON   | Richard Myers, HAIB         |
| MCF7      | MAX             | ENCFF000QOS   | Richard Myers, HAIB         |
| HCT116    | SIN3A           | ENCFF000PCD   | Richard Myers, HAIB         |
| HCT116    | SIN3A           | ENCFF000PCE   | Richard Myers, HAIB         |
| MCF7      | SIN3A           | ENCFF175HFF   | Michael Snyder, Stanford    |
| MCF7      | SIN3A           | ENCFF733YZZ   | Michael Snyder, Stanford    |
| HCT116    | TEAD4           | ENCFF000PDC   | Richard Myers, HAIB         |
| HCT116    | TEAD4           | ENCFF000QSB   | Richard Myers, HAIB         |
| MCF7      | TEAD4           | ENCFF000PDE   | Richard Myers, HAIB         |
| MCF7      | TEAD4           | ENCFF000QSI   | Richard Myers, HAIB         |
| HCT116    | SRF             | ENCFF000OZI   | Richard Myers, HAIB         |
| HCT116    | SRF             | ENCFF000PCV   | Richard Myers, HAIB         |
| MCF7      | SRF             | ENCFF000QRE   | Richard Myers, HAIB         |
| MCF7      | SRF             | ENCFF000QRH   | Richard Myers, HAIB         |
| HCT116    | EGR1            | ENCFF000OZI   | Richard Myers, HAIB         |
| HCT116    | EGR1            | ENCFF000OZL   | Richard Myers, HAIB         |
| MCF7      | EGR1            | ENCFF000QMC   | Richard Myers, HAIB         |
| MCF7      | EGR1            | ENCFF000QMF   | Richard Myers, HAIB         |
| HCT116    | ELF1            | ENCFF000OZS   | Richard Myers, HAIB         |
| HCT116    | ELF1            | ENCFF000OZU   | Richard Myers, HAIB         |
| MCF7      | ELF1            | ENCFF000QMJ   | Richard Myers, HAIB         |
| MCF7      | ELF1            | ENCFF000QMK   | Richard Myers, HAIB         |
| HCT116    | H3K4me3         | ENCFF001FIS   | John Stamatoyannopoulos, UW |
| HCT116    | H3K4me3         | ENCFF001FIZ   | John Stamatoyannopoulos, UW |
| MCF7      | H3K4me3         | ENCFF001FYK   | John Stamatoyannopoulos, UW |
| MCF7      | H3K4me3         | ENCFF001FYE   | John Stamatoyannopoulos, UW |
| HCT116    | H3K36me3        | ENCFF002AAO   | Peggy Farnham, USC          |
| HCT116    | H3K36me3        | ENCFF002AAN   | Peggy Farnham, USC          |
| MCF7      | H3K36me3        | ENCFF000VGE   | Peggy Farnham, USC          |
| MCF7      | H3K36me3        | ENCFF000VGG   | Peggy Farnham, USC          |
| HCT116    | DNaseI-seq      | ENCFF001DCL   | John Stamatoyannopoulos, UW |
| HCT116    | DNaseI-seq      | ENCFF001DCK   | John Stamatoyannopoulos, UW |
| MCF7      | DNaseI-seq      | ENCFF001DYT   | John Stamatoyannopoulos, UW |
| MCF7      | DNaseI-seq      | ENCFF001DZK   | John Stamatoyannopoulos, UW |
