# Supplementary material for: Identification of a core TP53 transcriptional program with highly distributed tumor suppressive activity
Source: PubMed Central journal article supplement — Genome Res. 2017 Oct;27(10):1645–57. doi: 10.1101/gr.220533.117 (PMC5630028; doi:10.1101/gr.220533.117), 2017-10
Supplement: supp_gr.220533.117_Supplemental_TableS4.pdf [file supp_gr.220533.117_Supplemental_TableS4.pdf]

**Supplemental Table S4.** Primers used in GRO-seq library preparation.

|                                                                                                   |
|---------------------------------------------------------------------------------------------------|
| HiSeq forward primer<br>AATGATACGGCGACCACCGAGATCTACACGTTTCAGAGTTCTACAGTCCGA                       |
| HiSeq Indexed reverse primer 1<br>CAAGCAGAAGACGGCATACGAGATCGTGATGTGACTGGAGTTCCTTGGCACCCGAGAATTCCA |
| HiSeq Indexed reverse primer 2<br>CAAGCAGAAGACGGCATACGAGATACATCGGTGACTGGAGTTCCTTGGCACCCGAGAATTCCA |
| HiSeq Indexed reverse primer 3<br>CAAGCAGAAGACGGCATACGAGATGCCTAAGTGACTGGAGTTCCTTGGCACCCGAGAATTCCA |
| HiSeq Indexed reverse primer 4<br>CAAGCAGAAGACGGCATACGAGATTGGTCAGTGACTGGAGTTCCTTGGCACCCGAGAATTCCA |
