# Supplementary material for: Identification of a core TP53 transcriptional program with highly distributed tumor suppressive activity
Source: HighWire-hosted journal article supplement (doi:10.1101/gr.220533.117), 2017-09-13
Supplement: Supplemental_File_S1_GROseq_data.xlsx [file Supplemental_File_S1_GROseq_data.xlsx]

## Sheet: HCT116
GRO-seq - HCT116 - DESeq2 Results (Nutlin vs. DMSO) - Refseq genes - padj < 0.05
	Chromosome	Start	End	Strand	Gene ID	Accession	Base Mean DMSO	Base Mean Nutlin	Fold Change	Fold Change (log2)	p	padj
	chr6	36644237	36655116	+	CDKN1A	NM_000389	5264.83	29331.7	3.69558	1.8858	2.39741e-36	2.56715e-32
	chr1	203274664	203278729	+	BTG2	NM_006763	995.249	5231.98	3.61018	1.85207	9.46775e-33	5.06903e-29
	chr10	90750288	90775542	+	FAS	NM_152871	795.153	3985.7	3.19132	1.67415	2.89466e-24	1.0332e-20
	chr10	90694831	90751147	-	ACTA2	NM_001141945	285.055	1668.24	3.34598	1.74243	3.82861e-23	1.02492e-19
	chr12	69201952	69239324	+	MDM2	NM_002392	10696.6	54606.3	3.00236	1.5861	1.26058e-21	2.69966e-18
	chr17	72838162	72856966	-	GRIN2C	NM_001278553	1440.62	4848.47	2.66965	1.41665	1.35389e-20	2.41625e-17
	chr17	72858619	72869156	-	FDXR	NM_001258014	1369.78	4392.52	2.56343	1.35807	9.70544e-19	1.48465e-15
	chr19	18496968	18499986	+	GDF15	NM_004864	1931.3	7580.7	2.62677	1.39329	6.66624e-18	8.92276e-15
	chr6	43543878	43588260	+	POLH	NM_001291969	2746.43	7533.46	2.29157	1.19634	1.86877e-16	2.22342e-13
	chr6	109307640	109415708	-	SESN1	NM_001199933	651.517	3272.24	2.73513	1.45161	3.71622e-16	3.97933e-13
	chr8	95938200	95961615	-	TP53INP1	NM_033285	692.192	2690.49	2.56983	1.36167	4.6452e-16	4.52189e-13
	chr15	63445539	63449741	-	RPS27L	NM_015920	443.687	1684.15	2.59466	1.37554	1.62755e-15	1.45231e-12
	chr1	28585963	28609002	+	SESN2	NM_031459	1757.53	5136.22	2.22808	1.1558	1.05967e-13	8.72846e-11
	chr11	706120	727727	+	EPS8L2	NM_022772	1243.97	4304.93	2.2732	1.18472	2.67175e-12	1.90727e-09
	chr3	178735011	178789656	-	ZMAT3	NM_152240	887.24	3140.85	2.27755	1.18748	7.5779e-12	5.07151e-09
	chr11	47236493	47260769	+	DDB2	NM_000107	3107.57	7096.12	1.97536	0.982115	1.65964e-11	1.04538e-08
	chr12	99007182	99038829	-	IKBIP	NM_153687	804.65	2718.3	2.21396	1.14663	3.5545e-11	2.11453e-08
	chr5	156693090	156822606	+	CYFIP2	NM_001037333	3025.9	10018.2	2.17747	1.12265	5.07455e-11	2.85991e-08
	chr19	49458117	49465055	+	BAX	NM_001291430	1099.53	2783.59	2.0535	1.03808	8.04385e-11	4.30668e-08
	chr8	22960327	22974950	+	TNFRSF10C	NM_003841	227.37	945.45	2.30439	1.20438	1.01854e-10	5.19361e-08
	chr1	201434607	201438299	-	PHLDA3	NR_073080	479.015	1563.41	2.2612	1.17709	1.44483e-10	7.03238e-08
	chr12	4430359	4469190	+	C12orf5	NM_020375	2015.05	5939.65	2.09348	1.06591	1.94541e-10	9.05713e-08
	chr15	76196200	76227608	+	FBXO22	NR_037623	2855.11	6254.64	1.90469	0.929553	2.22059e-10	9.90755e-08
	chr17	58677544	58743640	+	PPM1D	NM_003620	3865.07	9616.98	1.96771	0.976521	5.63515e-10	2.41365e-07
	chr8	22877648	22926700	-	TNFRSF10B	NM_003842	6202.21	16800.7	2.0299	1.02141	8.77062e-10	3.61214e-07
	chr6	106534195	106557814	+	PRDM1	NM_001198	285.932	1013.3	2.17476	1.12086	1.12334e-09	4.4551e-07
	chr17	48133340	48167849	+	ITGA3	NM_005501	6941.72	13714.6	1.77324	0.826387	4.47269e-09	1.71049e-06
	chr8	103216729	103251346	-	RRM2B	NM_015713	1597.06	4305.11	1.9718	0.979512	6.92417e-09	2.55669e-06
	chr1	112264686	112298419	-	FAM212B	NM_019099	1183.99	3853.93	2.04346	1.03101	7.35843e-09	2.62647e-06
	chr18	61144144	61172318	+	SERPINB5	NM_002639	785.957	3420.23	2.09559	1.06736	9.4172e-09	3.25288e-06
	chr9	19408925	19452500	+	ACER2	NM_001010887	371.128	1477.47	2.08687	1.06134	1.71916e-08	5.57843e-06
	chr6	64281917	64293493	+	PTP4A1	NM_003463	4457.18	8711.07	1.73451	0.794528	3.17091e-08	9.9865e-06
	chr6	111804675	111923497	+	TRAF3IP2-AS1	NR_034111	1062.39	2735.36	1.93666	0.953574	3.52021e-08	1.07698e-05
	chr20	25653831	25677540	-	ZNF337	NM_015655	1786.96	3813.89	1.80596	0.852766	3.67933e-08	1.0944e-05
	chr19	47724079	47736023	-	BBC3	NM_001127242	1299.06	3072	1.84723	0.885362	7.08464e-08	2.05033e-05
	chr1	211748381	211752099	-	SLC30A1	NM_021194	725.216	1804.09	1.88735	0.916361	1.01369e-07	2.7213e-05
	chr1	27668483	27680423	+	SYTL1	NM_032872	1072.08	2437.47	1.82515	0.868012	1.00624e-07	2.7213e-05
	chr14	70078310	70181861	+	KIAA0247	NM_014734	1792.21	5041.73	1.87657	0.9081	1.01655e-07	2.7213e-05
	chr11	82970135	82997450	-	CCDC90B	NM_001286118	1541.14	3386.23	1.79805	0.846437	1.35806e-07	3.54686e-05
	chr17	66244145	66253305	+	AMZ2	NM_001033572	1528.63	3151.65	1.7634	0.81836	1.69897e-07	4.33157e-05
	chr17	48127713	48133103	-	LOC284080	NR_038230	935.129	2556.54	1.91219	0.935224	2.66436e-07	6.567e-05
	chr6	100956071	101329248	-	ASCC3	NM_022091	1730.28	3787.25	1.77967	0.831611	2.69843e-07	6.567e-05
	chr10	102033035	102046469	-	BLOC1S2	NM_001282439	1672.42	3726.33	1.78659	0.837207	3.60755e-07	8.58436e-05
	chr5	10277707	10308168	-	CMBL	NM_138809	1399.5	3811.44	1.84532	0.883871	3.68958e-07	8.58871e-05
	chr12	120881764	120884215	-	TRIAP1	NM_016399	439.687	1173.74	1.88342	0.913355	3.92745e-07	8.9479e-05
	chr12	56324946	56347807	+	DGKA	NM_001345	1086.17	2737.65	1.81663	0.861264	4.46783e-07	9.96697e-05
	chr11	71164217	71212581	+	NADSYN1	NM_018161	1939.16	4640.97	1.79196	0.84154	4.60817e-07	0.000100703
	chr3	14186648	14220172	-	XPC	NM_001145769	3066.75	6140.02	1.72433	0.786036	5.02286e-07	0.000107154
	chr10	91339254	91405329	-	PANK1	NM_148977	1743.09	5082.63	1.84834	0.886229	5.10355e-07	0.000107154
	chr19	8387468	8408146	-	KANK3	NM_198471	2037.92	3952.26	1.69579	0.76196	5.59225e-07	0.000115157
	chr11	64591662	64612041	-	CDC42BPG	NM_017525	1132.28	2407.74	1.74212	0.800848	8.94142e-07	0.000180651
	chr2	69969127	70053596	+	ANXA4	NM_001153	2838.12	6048.96	1.71363	0.777052	1.15869e-06	0.000229765
	chr5	57749810	57755966	-	PLK2	NM_001252226	1878.4	4645.93	1.81597	0.860737	1.42115e-06	0.000276685
	chr5	72848025	72861511	-	ANKRA2	NM_023039	449.662	1309.86	1.86506	0.899225	1.64141e-06	0.000313861
	chr12	102271105	102317401	+	DRAM1	NM_018370	638.422	1885.5	1.84299	0.882048	1.87046e-06	0.000351384
	chr15	89164527	89175512	+	AEN	NM_022767	4583.35	8045.39	1.5974	0.675727	2.3289e-06	0.000429963
	chr12	120105761	120119429	+	PRKAB1	NM_006253	1886.47	4090.83	1.70843	0.772669	2.72058e-06	0.000493763
	chr5	162864577	162872022	+	CCNG1	NM_199246	1125.68	2297.04	1.69956	0.765159	2.91726e-06	0.000520634
	chrX	43036243	43085847	+	LOC101927501	NR_110387	147.467	645.356	1.85304	0.889897	3.39563e-06	0.000596072
	chr2	105977283	106055230	-	FHL2	NM_001450	7723.27	13658.4	1.65144	0.723727	3.89138e-06	0.000672079
	chr1	45266036	45271667	+	PLK3	NM_004073	1617.8	3122.42	1.67249	0.741997	4.40154e-06	0.000748122
	chr9	130186653	130207651	+	ZNF79	NM_001286697	1147.27	2345.22	1.6829	0.750948	5.05993e-06	0.000846589
	chr7	100770370	100782547	+	SERPINE1	NM_000602	1675.26	3065.53	1.70023	0.765726	6.98601e-06	0.00115086
	chr17	62962668	62971703	-	AMZ2P1	NR_026903	647.858	1480.99	1.74297	0.80155	1.01028e-05	0.00161463
	chr10	74033677	74035797	+	DDIT4	NM_019058	881.616	2294.32	1.73011	0.790863	1.10624e-05	0.00174201
	chr12	99039078	99129211	+	APAF1	NM_001160	1481.57	3518.06	1.68712	0.754559	1.40473e-05	0.00214883
	chr1	233086370	233114219	+	NTPCR	NM_032324	719.406	1502.86	1.67774	0.746518	1.42811e-05	0.00215383
	chr1	68150860	68154021	+	GADD45A	NM_001199741	1685.06	3151.2	1.61738	0.693658	1.75466e-05	0.00260956
	chr8	22993101	23021543	-	TNFRSF10D	NM_003840	3200.53	5590.6	1.55399	0.635975	2.65079e-05	0.00373482
	chrX	68048840	68062006	+	EFNB1	NM_004429	241.126	798.94	1.7391	0.798338	2.96579e-05	0.00412437
	chr1	3547331	3566671	-	WRAP73	NM_017818	1491.24	3357.75	1.65113	0.723454	3.07255e-05	0.0041544
	chr11	33060963	33095109	+	TCP11L1	NM_018393	1194.27	2381.01	1.62503	0.70047	3.10377e-05	0.0041544
	chr1	212738676	212794119	+	ATF3	NM_001206488	3732.28	6462.97	1.60711	0.684468	3.06245e-05	0.0041544
	chr19	44270685	44285409	-	KCNN4	NM_002250	1093.92	2106.33	1.61233	0.689147	3.30222e-05	0.00436546
	chr12	2055214	2113677	-	DCP1B	NM_152640	1454.36	2658.92	1.5792	0.65919	4.20093e-05	0.00536907
	chr22	39417118	39429256	+	APOBEC3D	NM_152426	418.778	929.879	1.67419	0.743461	4.39899e-05	0.0055417
	chr3	167727654	167813417	-	GOLIM4	NM_014498	1553.64	2859.66	1.57579	0.656075	6.23834e-05	0.00776746
	chr5	137801181	137805004	+	EGR1	NM_001964	4451.22	2912.58	0.609856	-0.713459	6.51471e-05	0.00801834
	chr3	152880001	152888413	+	RAP2B	NM_002886	2340.88	4074.78	1.54353	0.626235	7.73404e-05	0.00913166
	chr18	77915117	78005397	-	PARD6G	NM_032510	1190.44	2957.42	1.62554	0.700916	0.00010229	0.0119057
	chr2	158114340	158167913	+	GALNT5	NM_014568	3132.76	5213.03	1.51856	0.602702	0.000109652	0.0126253
	chrX	3522384	3631675	-	PRKX	NM_005044	1223.97	2842.68	1.62614	0.701454	0.000121434	0.0138331
	chr19	40928409	40931932	-	SERTAD1	NM_013376	1393.1	2549.51	1.59755	0.675859	0.000134375	0.0151462
	chr17	35849951	35873588	+	DUSP14	NM_007026	2081.68	3624.58	1.51798	0.602157	0.000167735	0.0187095
	chr20	5095599	5107268	-	PCNA	NM_182649	2747.7	4579.83	1.49857	0.583591	0.000173986	0.0192066
	chr2	197697728	197791454	-	PGAP1	NM_024989	1287.09	3065.8	1.59505	0.673599	0.000184686	0.0201541
	chr1	6475294	6479979	-	HES2	NM_019089	649.327	1227.23	1.57188	0.652491	0.000192376	0.0205996
	chr12	10851676	10875953	-	YBX3	NM_003651	4412.29	7995.99	1.52698	0.610679	0.000198062	0.0209985
	chr2	70674412	70781147	-	TGFA	NM_003236	5045.1	7826.24	1.44352	0.529586	0.000213465	0.0224097
	chr22	35796116	35820495	+	MCM5	NM_006739	6030.9	3589.64	0.646078	-0.630219	0.000215937	0.022449
	chr20	43953929	43977064	-	SDC4	NM_002999	5807.74	9172.07	1.47165	0.557438	0.000225717	0.0231568
	chr4	153242410	153456393	-	FBXW7	NM_018315	1277.49	2759.62	1.57554	0.655845	0.000257691	0.0257884
	chr12	27124506	27167339	-	TM7SF3	NM_016551	1356.9	2812.82	1.57029	0.651035	0.000293422	0.0290922
	chr11	58294344	58345639	-	LPXN	NM_001143995	1252.12	2250.51	1.51632	0.600572	0.000375374	0.036541
	chr12	108956294	108963160	+	ISCU	NM_213595	1115.27	2361.44	1.55698	0.638754	0.000391169	0.0377355
	chr18	43563502	43652250	-	PSTPIP2	NM_024430	1450.88	3203.05	1.56259	0.643936	0.000395631	0.0378252
	chr22	39410265	39414825	+	APOBEC3C	NM_014508	430.987	896.969	1.5675	0.648466	0.000407832	0.0384779
	chr2	191208196	191236391	+	INPP1	NM_002194	738.895	1461.85	1.55736	0.639099	0.000409645	0.0384779
	chr1	33402050	33430286	-	RNF19B	NM_153341	1306	2259.07	1.49232	0.577561	0.000426295	0.0393691
	chr19	18451408	18480763	+	PGPEP1	NM_017712	900.691	1559.35	1.51356	0.59795	0.000426487	0.0393691
	chr18	21269562	21535029	+	LAMA3	NM_000227	426.508	1324.14	1.5902	0.669206	0.000463922	0.042099
	chr1	45274154	45279801	+	BTBD19	NM_001136537	745.251	1494.61	1.56179	0.643201	0.000476332	0.0428619
	chr3	44379611	44450940	+	TCAIM	NM_001029840	741.878	1495.48	1.55749	0.639221	0.000512379	0.0453762
	chr1	182992595	183114727	+	LAMC1	NM_002293	4442.06	6879.92	1.42664	0.51262	0.000512749	0.0453762
	chr17	27071023	27077976	+	TRAF4	NM_004295	2874.76	5123.78	1.47832	0.563959	0.000525053	0.0460842
	chr12	10516368	10551105	+	LOC101928100	NR_120430	606.927	1239.18	1.5452	0.627789	0.000565425	0.0492241
	chr19	9732158	9745538	+	C19orf82	NM_001242812	432.864	943.776	1.56174	0.643152	0.000574739	0.0496315

## Sheet: MCF7
GRO-seq - MCF7 - DESeq2 Results (Nutlin vs. DMSO) - Refseq genes - padj < 0.05
	Chromosome	Start	End	Strand	Gene ID	Accession	Base Mean DMSO	Base Mean Nutlin	Fold Change	Fold Change (log2)	p	padj
	chr12	69201952	69239324	+	MDM2	NM_002392	2815.23	15290.9	3.63641	1.86251	6.12451e-69	5.74969e-65
	chr6	36644237	36655116	+	CDKN1A	NM_001291549	1445.88	7410.18	3.53515	1.82177	1.03316e-67	4.84965e-64
	chr6	109307640	109415708	-	SESN1	NM_001199933	283.734	1452.93	2.9023	1.5372	2.53715e-38	7.9396e-35
	chr4	52917593	52963458	+	SPATA18	NM_145263	130.068	898.893	2.93782	1.55474	4.22288e-36	9.91109e-33
	chr11	47236493	47260769	+	DDB2	NM_000107	1920.07	6158.79	2.43923	1.28643	4.06864e-34	7.63928e-31
	chr1	203274664	203278729	+	BTG2	NM_006763	299.275	1373.43	2.65805	1.41037	4.91658e-32	7.6928e-29
	chrX	65815482	65859140	-	EDA2R	NM_001242310	99.0955	686.637	2.74462	1.45661	2.14045e-31	2.87065e-28
	chr12	4430359	4469190	+	C12orf5	NM_020375	527.176	1824.46	2.3794	1.2506	1.19514e-27	1.4025e-24
	chr19	18496968	18499986	+	GDF15	NM_004864	698.792	2412.06	2.36982	1.24478	1.80311e-27	1.88085e-24
	chr8	95938200	95961615	-	TP53INP1	NM_033285	564.195	1882.57	2.34058	1.22686	4.99065e-27	4.68522e-24
	chr10	90750288	90775542	+	FAS	NM_152871	42.9592	434.386	2.52426	1.33586	8.63022e-27	7.3655e-24
	chr17	72858619	72869156	-	FDXR	NM_001258014	148.363	792.116	2.5103	1.32786	1.29059e-26	1.00967e-23
	chr19	49458117	49465055	+	BAX	NM_138761	293.759	1104.79	2.29986	1.20154	2.25053e-23	1.62523e-20
	chr17	58677544	58743640	+	PPM1D	NM_003620	11611.7	29064.5	2.0349	1.02496	7.81036e-23	5.23741e-20
	chr8	22877648	22926700	-	TNFRSF10B	NM_003842	823.541	2312.31	2.12612	1.08822	1.26714e-22	7.93061e-20
	chr5	156693090	156822606	+	CYFIP2	NM_001037333	764.361	2226.11	2.13941	1.09721	3.59453e-22	2.10909e-19
	chr1	201434607	201438299	-	PHLDA3	NR_073080	329.67	1163.77	2.23377	1.15948	5.2031e-22	2.87334e-19
	chr1	28585963	28609002	+	SESN2	NM_031459	561.407	1933.84	2.18218	1.12577	9.56658e-21	4.9895e-18
	chr8	103216729	103251346	-	RRM2B	NM_015713	726.326	1877.87	1.96647	0.975609	8.19951e-18	4.05142e-15
	chr6	43543878	43588260	+	POLH	NM_001291969	961.784	2677.04	1.98018	0.985629	4.97787e-17	2.33661e-14
	chr15	89164527	89175512	+	AEN	NM_022767	1407.27	3219.47	1.8683	0.901729	5.4637e-17	2.44253e-14
	chr3	14186648	14220172	-	XPC	NM_001145769	1752.36	3865.66	1.83818	0.878277	8.42064e-17	3.59332e-14
	chr17	72838162	72856966	-	GRIN2C	NM_000835	101.938	512.362	2.02947	1.0211	3.25037e-16	1.32672e-13
	chr5	162864577	162872022	+	CCNG1	NM_199246	173.505	610.872	1.98054	0.985896	2.76946e-15	1.08332e-12
	chr9	94903749	94921890	+	LINC00475	NR_027341	175.498	634.132	1.93424	0.951767	3.10306e-14	1.16526e-11
	chr15	76196200	76227608	+	FBXO22	NR_037623	967.842	2123.51	1.76115	0.816519	3.53012e-13	1.27465e-10
	chr14	24867992	24888494	+	NYNRIN	NM_025081	174.521	565.256	1.87578	0.907494	3.86093e-13	1.34246e-10
	chr6	64281917	64293493	+	PTP4A1	NM_003463	936.954	2029.45	1.74982	0.807205	6.6312e-13	2.22335e-10
	chr20	25653831	25677540	-	ZNF337	NM_015655	749.787	1681.33	1.76552	0.820094	7.30284e-13	2.36411e-10
	chr1	112264686	112298419	-	FAM212B	NM_019099	697.326	1627.12	1.74376	0.802199	1.37919e-11	4.31596e-09
	chr5	43287572	43313614	-	HMGCS1	NM_002130	948.156	1939.55	1.66692	0.737181	7.98937e-11	2.41949e-08
	chr19	47724079	47736023	-	BBC3	NM_001127242	373.187	901.665	1.71996	0.782377	1.46464e-10	4.29688e-08
	chrX	3522384	3631675	-	PRKX	NM_005044	648.741	1381.43	1.66922	0.739176	2.46635e-10	7.01639e-08
	chr18	649620	658340	-	TYMSOS	NM_001012716	150.555	468.664	1.7306	0.791276	2.84276e-10	7.84935e-08
	chr5	10277707	10308168	-	CMBL	NM_138809	168.385	486.137	1.72566	0.787149	3.39369e-10	9.10286e-08
	chr10	102033035	102046469	-	BLOC1S2	NM_001282439	280.695	695.679	1.70185	0.767101	5.09818e-10	1.32949e-07
	chr11	65659692	65667997	-	FOSL1	NM_005438	210.449	568.475	1.70609	0.770691	6.89372e-10	1.74914e-07
	chr15	63445539	63449741	-	RPS27L	NM_015920	97.0648	339.211	1.6949	0.761203	9.34911e-10	2.30972e-07
	chr9	124101266	124132582	-	STOM	NM_001270527	263.856	649.726	1.6846	0.752407	1.19937e-09	2.88709e-07
	chr12	99007182	99038829	-	IKBIP	NM_153687	97.5536	347.218	1.6817	0.749919	1.47782e-09	3.46845e-07
	chr16	67977377	68002597	-	SLC12A4	NM_005072	91.5037	312.309	1.65897	0.730284	3.91938e-09	8.76075e-07
	chr10	48355089	48373866	+	ZNF488	NM_153034	189.154	499.764	1.66716	0.737396	3.88325e-09	8.76075e-07
	chr4	128703453	128754526	+	HSPA4L	NM_014278	293.212	686.072	1.65177	0.724013	4.23556e-09	9.03715e-07
	chr12	102271105	102317401	+	DRAM1	NM_018370	360.416	805.311	1.6422	0.715631	4.17482e-09	9.03715e-07
	chr6	100956071	101329248	-	ASCC3	NM_022091	358.619	800.403	1.64026	0.713924	4.66976e-09	9.74216e-07
	chr10	102106772	102124588	+	SCD	NM_005063	2435.06	4476.23	1.55974	0.641301	7.33348e-09	1.49667e-06
	chr12	27124506	27167339	-	TM7SF3	NM_016551	548.888	1129.28	1.60838	0.685605	7.6898e-09	1.536e-06
	chr12	2055214	2113677	-	DCP1B	NM_152640	560.289	1124.08	1.59326	0.671984	1.1993e-08	2.29777e-06
	chr8	11653082	11696818	+	FDFT1	NM_001287756	1233.61	2220.4	1.54462	0.62725	1.19373e-08	2.29777e-06
	chr2	69969127	70053596	+	ANXA4	NM_001153	1353.43	2418.31	1.52975	0.613299	3.06966e-08	5.65059e-06
	chr1	68150860	68154021	+	GADD45A	NM_001199741	113.852	341.088	1.61424	0.690855	3.03245e-08	5.65059e-06
	chr12	77415026	77459360	-	E2F7	NM_203394	1244.11	2220.9	1.52643	0.610158	4.16314e-08	7.51607e-06
	chr18	657604	673499	+	TYMS	NM_001071	835.203	1540.84	1.5356	0.6188	6.77213e-08	1.17847e-05
	chr11	65190269	65194003	+	NEAT1	NR_028272	2375.79	3973.85	1.48705	0.572451	6.77856e-08	1.17847e-05
	chr7	86954664	86974808	-	TP53TG1	NR_015381	292.623	643.025	1.57123	0.651894	1.43475e-07	2.44899e-05
	chr9	130186653	130207651	+	ZNF79	NM_001286697	495.911	994.271	1.54502	0.62763	2.17248e-07	3.57811e-05
	chr9	139388896	139440238	-	NOTCH1	NM_017617	1277.58	2153.24	1.47057	0.556375	4.43396e-07	7.1769e-05
	chr7	155089486	155101945	+	INSIG1	NM_198337	1269.04	2183.46	1.4781	0.56374	6.44474e-07	0.000102548
	chr6	111804675	111923497	+	TRAF3IP2-AS1	NR_034111	258.529	565.906	1.53588	0.619065	6.95051e-07	0.000108752
	chr8	128748315	128753680	+	MYC	NM_002467	1773.3	1042.68	0.681144	-0.553969	8.39651e-07	0.000127139
	chr1	27668483	27680423	+	SYTL1	NM_032872	778.371	1365.83	1.46857	0.554416	1.95226e-06	0.000290918
	chr4	166248818	166264314	+	MSMO1	NM_001017369	426.917	807.85	1.48976	0.575076	2.16799e-06	0.000318016
	chr19	18451408	18480763	+	PGPEP1	NM_017712	599.766	1069.26	1.46761	0.55347	2.83282e-06	0.000409146
	chr8	126010720	126034525	+	SQLE	NM_003129	1513.06	2511.13	1.43995	0.52602	3.4323e-06	0.000488219
	chr11	82970135	82997450	-	CCDC90B	NM_001286118	664.766	1165.09	1.45425	0.54028	4.96818e-06	0.000696138
	chr9	19408925	19452500	+	ACER2	NM_001010887	289.244	586.081	1.47777	0.563424	6.14311e-06	0.000848111
	chr8	22960327	22974950	+	TNFRSF10C	NM_003841	47.4431	494.001	1.32175	0.402446	8.31719e-06	0.00113162
	chr8	23048970	23082680	-	TNFRSF10A	NM_003844	425.885	779.423	1.45534	0.541352	8.43962e-06	0.00113187
	chr5	74632993	74657926	+	HMGCR	NM_000859	767.244	1270.91	1.41985	0.505736	1.23726e-05	0.00162333
	chr1	45274154	45279801	+	BTBD19	NM_001136537	90.781	242.698	1.44745	0.533509	1.24499e-05	0.00162333
	chr19	38826443	38861589	+	CATSPERG	NM_021185	762.507	1286.08	1.42209	0.50801	1.40743e-05	0.00180999
	chr1	151023447	151032125	-	CDC42SE1	NM_001038707	1413.22	2204.78	1.3896	0.474666	1.54438e-05	0.00195927
	chr15	63334838	63364113	+	TPM1	NM_000366	3338.32	2216.1	0.729221	-0.455573	1.57569e-05	0.00197234
	chr1	233086370	233114219	+	NTPCR	NM_032324	237.33	470.538	1.44304	0.529112	2.34578e-05	0.00289766
	chr14	91923825	91976824	-	SMEK1	NM_001284281	3067.66	4537.31	1.35483	0.438116	2.84816e-05	0.00347253
	chr14	70078310	70181861	+	KIAA0247	NM_014734	1554.61	2377.81	1.37189	0.456164	3.12812e-05	0.00376497
	chr2	95940201	95957055	+	PROM2	NM_001165977	624.372	1038.79	1.40463	0.490187	3.29165e-05	0.00391164
	chr4	159045732	159094202	-	FAM198B	NM_016613	424.367	737.415	1.41025	0.495954	4.52999e-05	0.00531595
	chr2	11817705	11967533	+	LPIN1	NM_145693	954.283	1508.71	1.38019	0.464872	4.65696e-05	0.00539747
	chr16	88718348	88729495	-	MVD	NM_002461	598.829	1003.52	1.39904	0.48444	5.03255e-05	0.00576166
	chr19	46112658	46148775	-	EML2	NM_001193269	569.616	944.617	1.39604	0.481341	5.10734e-05	0.00577683
	chr6	111620234	111804918	-	REV3L	NM_001286432	3528.02	5095.37	1.33291	0.414581	6.1397e-05	0.00682946
	chr1	33402050	33430286	-	RNF19B	NM_153341	298.746	556.279	1.41302	0.498785	6.18347e-05	0.00682946
	chr19	11200038	11244505	+	LDLR	NM_001195798	4591.8	6647.41	1.33138	0.412922	7.15886e-05	0.00781481
	chr19	42363988	42375484	+	RPS19	NM_001022	2726.71	3940.94	1.33105	0.412566	7.64705e-05	0.00825178
	chr12	110011500	110035071	+	MVK	NM_000431	1270.25	1994.31	1.36958	0.453736	8.38488e-05	0.00894515
	chr19	18367906	18385319	-	KIAA1683	NM_001145305	855.918	1341.39	1.36777	0.451825	9.32183e-05	0.00983296
	chr1	155278539	155290457	+	FDPS	NM_001135822	1264.28	1961.63	1.3594	0.442973	9.92483e-05	0.0103527
	chr20	33462766	33515769	+	ACSS2	NM_001076552	361.644	640.406	1.3909	0.476015	0.000120636	0.0124454
	chr3	101293042	101313281	+	PCNP	NM_020357	555.416	904.278	1.37184	0.45611	0.000138884	0.0140196
	chr10	1085964	1095061	-	IDI1	NM_004508	519.622	860.56	1.37592	0.4604	0.000140375	0.0140196
	chr1	6475294	6479979	-	HES2	NM_019089	82.4906	203.785	1.37129	0.455538	0.000150752	0.0148974
	chr5	72848025	72861511	-	ANKRA2	NM_023039	138.186	290.316	1.38174	0.466489	0.000180286	0.0176305
	chr5	176910395	176924606	-	PDLIM7	NM_213636	832.868	469.525	0.724504	-0.464935	0.000185092	0.0179138
	chr2	65313988	65357435	-	RAB1A	NM_015543	1272.32	1927.32	1.33823	0.420331	0.000227137	0.0217588
	chr8	144873090	144897549	-	SCRIB	NM_182706	966.568	1459.79	1.33776	0.419824	0.000234219	0.0222106
	chr2	24300303	24308085	-	TP53I3	NM_004881	229.446	423.318	1.37582	0.460288	0.000240104	0.022541
	chr19	9732158	9745538	+	C19orf82	NM_001242812	131.916	276.788	1.36851	0.452609	0.000267107	0.0248277
	chr21	47608360	47648738	-	LSS	NM_001001438	1518.43	2365.27	1.34277	0.425207	0.000302422	0.0276737
	chr12	108956294	108963160	+	ISCU	NM_213595	233.121	425.742	1.36864	0.452739	0.000303621	0.0276737
	chr7	143078360	143088206	+	ZYX	NM_001010972	517.396	299.516	0.735624	-0.442959	0.00037026	0.0334231
	chr10	91339254	91405329	-	PANK1	NM_148977	1034.24	1521.28	1.31931	0.399787	0.000397438	0.0355348
	chr9	115142189	115234685	+	HSDL2	NM_032303	1261.01	1885.53	1.3197	0.400212	0.000526236	0.0466067
	chr8	144939492	144952632	-	EPPK1	NM_031308	1877.34	1308.32	0.766787	-0.383102	0.000544135	0.0477415

## Sheet: SJSA
GRO-seq - SJSA - DESeq2 Results (Nutlin vs. DMSO) - Refseq genes - padj < 0.05
	Chromosome	Start	End	Strand	Gene ID	Accession	Base Mean DMSO	Base Mean Nutlin	Fold Change	Fold Change (log2)	p	padj
	chrX	65815482	65859140	-	EDA2R	NM_001199687	516.522	2306.56	2.48664	1.3142	2.36768e-30	2.98565e-26
	chr11	5710817	5732093	+	TRIM22	NM_006074	271.715	1470.46	2.46842	1.30359	1.25676e-28	5.28258e-25
	chr1	203274664	203278729	+	BTG2	NM_006763	287.326	1460.36	2.46131	1.29943	1.14994e-28	5.28258e-25
	chr17	72858619	72869156	-	FDXR	NM_001258016	166.466	994.618	2.44354	1.28897	8.69244e-28	2.74029e-24
	chr6	36644237	36655116	+	CDKN1A	NM_001291549	2051.28	7275.59	2.30168	1.20269	5.29791e-27	1.33613e-23
	chr10	90750288	90775542	+	FAS	NM_152871	342.312	1558.15	2.30489	1.2047	8.06243e-25	1.69445e-21
	chr1	28585963	28609002	+	SESN2	NM_031459	974.234	3408.83	2.23092	1.15764	1.24663e-24	2.24571e-21
	chr8	95938200	95961615	-	TP53INP1	NM_033285	138.249	787.804	2.2333	1.15918	8.69071e-23	1.36987e-19
	chr1	201434607	201438299	-	PHLDA3	NR_073080	308.777	1225.91	2.13567	1.09469	9.62504e-21	1.34857e-17
	chr11	47236493	47260769	+	DDB2	NM_000107	2257.27	6405.63	2.01156	1.00832	9.1874e-20	1.15853e-16
	chr19	49458117	49465055	+	BAX	NM_138761	790.973	2483.33	2.04229	1.03019	1.60014e-19	1.83434e-16
	chr6	109307640	109415708	-	SESN1	NM_001199933	291.879	1215.26	2.04827	1.03441	1.83892e-18	1.9324e-15
	chr12	4430359	4469190	+	C12orf5	NM_020375	1714.73	4652.6	1.93922	0.955478	9.54475e-18	9.2584e-15
	chr3	178735011	178789656	-	ZMAT3	NM_152240	967.075	2799.67	1.92274	0.943163	1.82358e-16	1.64252e-13
	chr15	89164527	89175512	+	AEN	NM_022767	2173.65	5345.66	1.78603	0.836758	1.28215e-13	1.07786e-10
	chr3	14186648	14220172	-	XPC	NM_001145769	1817.28	4299.92	1.75973	0.81535	3.45157e-13	2.72027e-10
	chr6	36321998	36355577	-	ETV7	NM_001207040	207.207	663.389	1.73267	0.792998	1.76577e-11	1.30979e-08
	chr8	103216729	103251346	-	RRM2B	NM_015713	494.448	1322.26	1.72204	0.784121	2.25495e-11	1.57972e-08
	chr6	43543878	43588260	+	POLH	NM_001291969	2991.1	6338.76	1.65851	0.729885	4.27605e-11	2.83795e-08
	chr17	8128139	8151413	-	CTC1	NR_046431	6658.37	3208.54	0.607877	-0.718149	6.13177e-11	3.86608e-08
	chr4	128703453	128754526	+	HSPA4L	NM_014278	285.486	941.727	1.68529	0.752999	1.46023e-10	8.76832e-08
	chr8	22877648	22926700	-	TNFRSF10B	NM_003842	5054.62	9987.07	1.60173	0.679632	4.46375e-10	2.55854e-07
	chr15	76196200	76227608	+	FBXO22	NR_037623	1269.53	2675.82	1.61923	0.695311	7.02936e-10	3.85393e-07
	chr19	47724079	47736023	-	BBC3	NM_001127242	485.087	1191.08	1.64114	0.714699	1.13587e-09	5.96804e-07
	chr20	46286150	46415360	-	SULF2	NM_001161841	381.633	1016.07	1.63994	0.713647	1.49332e-09	7.53233e-07
	chr15	63445539	63449741	-	RPS27L	NM_015920	100.923	448.14	1.59193	0.670773	1.67598e-09	8.12849e-07
	chr5	156693090	156822606	+	CYFIP2	NM_001037333	2252.34	4484.73	1.58696	0.666267	1.85591e-09	8.66777e-07
	chr6	100956071	101329248	-	ASCC3	NM_022091	801.061	1827.14	1.61857	0.694722	2.23079e-09	9.70008e-07
	chr10	102033035	102046469	-	BLOC1S2	NM_001282439	458.472	1111.56	1.6272	0.702396	2.15894e-09	9.70008e-07
	chr17	58677544	58743640	+	PPM1D	NM_003620	2323.19	4712.84	1.58973	0.668777	2.42642e-09	1.0199e-06
	chr1	212738676	212794119	+	ATF3	NM_001206488	826.259	1743.59	1.5753	0.655627	1.24599e-08	5.06838e-06
	chr18	43563502	43652250	-	PSTPIP2	NM_024430	575.959	1226.88	1.55005	0.632319	5.6668e-08	2.23308e-05
	chr6	64281917	64293493	+	PTP4A1	NM_003463	1005.71	2067.45	1.53546	0.618669	8.8656e-08	3.38774e-05
	chr19	18496968	18499986	+	GDF15	NM_004864	9.67629	122.007	1.38075	0.465454	1.27054e-07	4.71219e-05
	chr15	89182039	89198879	+	ISG20	NM_002201	693.492	1432.7	1.5242	0.60805	1.77074e-07	6.37972e-05
	chr8	22993101	23021543	-	TNFRSF10D	NM_003840	2312.13	4095.19	1.46858	0.554424	5.56899e-07	0.000195069
	chr1	116378999	116383747	-	NHLH2	NM_001111061	9.93687	113.572	1.3306	0.412074	1.16718e-06	0.000397786
	chr5	162864577	162872022	+	CCNG1	NM_199246	494.656	1099.38	1.48533	0.570782	1.33238e-06	0.000442139
	chr12	99007182	99038829	-	IKBIP	NM_153687	967.011	1798.85	1.46496	0.550858	1.59581e-06	0.000515977
	chr11	61025758	61062788	-	VWCE	NM_152718	238.803	551.058	1.47509	0.560801	1.93205e-06	0.000609078
	chr12	102271105	102317401	+	DRAM1	NM_018370	1969.35	3348.07	1.42135	0.507261	5.46163e-06	0.00167978
	chr2	69969127	70053596	+	ANXA4	NM_001153	1199.69	2126.1	1.41436	0.500153	1.41576e-05	0.00417323
	chr9	19408925	19452500	+	ACER2	NM_001010887	176.842	413.067	1.41916	0.505035	1.42307e-05	0.00417323
	chr12	69201952	69239324	+	MDM2	NM_002392	76150	327505	1.32867	0.409984	2.16563e-05	0.00593666
	chr6	106534195	106557814	+	PRDM1	NM_182907	88.096	249.3	1.38293	0.46773	2.13125e-05	0.00593666
	chr1	112264686	112298419	-	FAM212B	NM_019099	333.16	665.471	1.40821	0.493863	2.8698e-05	0.00753922
	chr11	117070040	117075508	+	TAGLN	NM_003186	2275.68	1358.32	0.724051	-0.465837	4.61159e-05	0.0118678
	chr8	8175258	8239344	-	SGK223	NM_001080826	1483.85	2416.27	1.36635	0.450324	6.96266e-05	0.017061
	chr19	42363988	42375484	+	RPS19	NM_001022	4921.12	7882.83	1.36085	0.444508	7.17075e-05	0.017061
	chr1	45266036	45271667	+	PLK3	NM_004073	307.817	601.231	1.3839	0.468744	7.14225e-05	0.017061
	chr1	211748381	211752099	-	SLC30A1	NM_021194	441.042	830.078	1.36968	0.453843	0.000120858	0.0277094
	chr6	111804675	111923497	+	TRAF3IP2-AS1	NR_034111	994.335	1627.29	1.35425	0.437498	0.000138412	0.0311674
	chr9	124101266	124132582	-	STOM	NM_001270527	745.381	1261.37	1.35893	0.44247	0.000142494	0.0315238
	chrY	7142013	7249588	+	PRKY	NR_028062	2986.83	4603.06	1.33642	0.418371	0.000164017	0.0356596
	chr2	70674412	70781147	-	TGFA	NM_003236	306.943	581.77	1.35884	0.442377	0.000177071	0.0378452

## Sheet: HCT116 - ncRNA
GRO-seq - HCT116 - DESeq2 Results (Nutlin vs. DMSO) - ncRNA - padj < 0.05
	Chromosome	Start	End	Strand	Transcript ID	Ensembl ID	Base Mean DMSO	Base Mean Nutlin	Fold Change	Fold Change (log2)	p	padj
	chr1	9242263	9252148	+	RP11-467J12.4-001	ENST00000562178.1	725.174	3066.04	4.22801	2.07998	3.18754e-18	8.05491e-15
	chr12	69221898	69222333	+	RP11-115D19.1-004	ENST00000513572.1	1103.06	3873.62	3.5117	1.81217	7.56505e-18	9.55844e-15
	chr8	95962453	95963624	+	RP11-347C18.3-002	ENST00000519034.1	593.212	2455.93	4.14005	2.04965	2.19526e-15	1.84914e-12
	chr1	201433511	201434274	-	LINC00475-002	ENST00000421234.1	145.767	842.316	5.77849	2.53069	5.81576e-15	3.67411e-12
	chr5	180618046	180618852	-	RP3-510D11.2-001	ENST00000412639.2	1214.58	3241.22	2.66858	1.41607	4.45721e-11	1.87723e-08
	chr5	173756615	173757506	+	RP11-134G8.8-001	ENST00000430471.1	299.733	1088.72	3.63229	1.86088	3.81848e-11	1.87723e-08
	chr16	53069602	53086785	-	RP11-529G21.2-001	ENST00000487827.1	837.985	3074.3	3.66869	1.87526	1.3567e-09	4.89769e-07
	chr9	94909874	94910588	+	RP11-83N9.5-003	ENST00000563018.1	141.531	660.823	4.66909	2.22314	6.509e-09	2.05603e-06
	chr8	22863894	22876848	-	GAS5-201	ENST00000363146.1	7472	3628.8	0.485652	-1.042	1.41865e-08	3.98324e-06
	chr6	36354608	36359771	+	RP5-1096D14.6-001	ENST00000354425.4	195.653	827.953	4.23174	2.08125	6.31353e-08	1.59543e-05
	chr3	45720724	45730626	-	RP11-875O11.1-001	ENST00000502083.2	2155.05	5093.66	2.3636	1.24098	2.45385e-07	5.63716e-05
	chr5	135416186	135416286	-	RP3-326I13.1-001	ENST00000440955.1	167.476	698.191	4.16889	2.05966	4.31173e-07	9.07978e-05
	chr3	193773268	193776178	-	TRAF3IP2-AS1-007	ENST00000532226.1	2567.13	5218.28	2.03273	1.02342	2.9092e-06	0.000565504
	chr19	49467247	49468286	+	RP11-7F17.7-001	ENST00000553613.1	1226.07	2401.02	1.95829	0.969598	5.36988e-06	0.000969263
	chr10	90775593	90776816	+	CTC-559E9.6-002	ENST00000586924.1	710.639	1636.83	2.30332	1.20372	6.43487e-06	0.00108406
	chr1	112282475	112289235	+	C17orf76-AS1-203	ENST00000391079.1	4418.77	2478.47	0.560895	-0.834197	9.13039e-06	0.00144203
	chr22	30642194	30642987	+	SNHG5-202	ENST00000384338.1	2616.42	1399.42	0.53486	-0.902767	1.0103e-05	0.00150179
	chr7	30589833	30591185	+	RP11-401F2.3-001	ENST00000585193.1	190.007	575.973	3.03132	1.59995	1.42304e-05	0.00199778
	chr8	128808208	128808274	+	RP11-1094H24.4-001	ENST00000499842.1	1964.7	4035.99	2.05425	1.03861	1.52536e-05	0.00202873
	chr19	19884687	19887232	-	LINC00663-002	ENST00000586885.1	450.557	1138.34	2.52653	1.33715	1.98762e-05	0.00251136
	chr10	90775593	90776816	+	SNORD87-001	ENST00000522478.1	1997.99	1051.8	0.526426	-0.925699	2.22928e-05	0.00268257
	chr10	132893481	132894040	+	SNHG6-201	ENST00000364849.1	2007.62	1067.31	0.531629	-0.911508	3.02648e-05	0.00332518
	chr10	132893481	132894040	+	RP11-462G8.3-001	ENST00000436942.1	37.2954	210.798	5.65213	2.49879	2.97573e-05	0.00332518
	chr11	62622764	62622838	-	SNHG1-205	ENST00000384147.1	9195.77	5599.87	0.608962	-0.715576	5.30622e-05	0.005587
	chr11	66101965	66107346	+	RP11-867G23.12-001	ENST00000526655.1	206.697	584.707	2.82881	1.5002	7.49196e-05	0.00757288
	chr12	69221898	69222333	+	RP11-611O2.1-001	ENST00000544710.1	95.6791	381.422	3.98647	1.99511	0.000162402	0.0157842
	chr5	10264709	10267258	-	CTD-2256P15.4-001	ENST00000606194.1	27.9813	190.92	6.82314	2.77044	0.000253768	0.0230113
	chr8	128808208	128808274	+	PVT1-201	ENST00000408388.1	82.1813	298.331	3.63015	1.86003	0.000266571	0.0230113
	chr10	72976981	72977582	-	UNC5B-AS1-002	ENST00000449737.1	66.8952	249.145	3.72441	1.89701	0.000273185	0.0230113
	chr10	90775593	90776816	+	RP11-399O19.9-001	ENST00000562983.1	99.1909	296.07	2.98485	1.57766	0.000267466	0.0230113
	chr17	27069248	27070120	-	AC010761.6-001	ENST00000582536.1	134.966	348.234	2.58017	1.36747	0.000444223	0.0362113
	chr5	135549736	135557847	+	TRPC7-AS1-001	ENST00000514459.1	212.036	635.79	2.9985	1.58424	0.000654777	0.0501401
	chr17	74136662	74149564	+	RNF157-AS1-002	ENST00000585542.1	49.4679	268.999	5.43785	2.44304	0.000648982	0.0501401
	chr7	5468362	5469303	+	RP11-1275H24.3-001	ENST00000608012.1	484.394	979.152	2.02139	1.01535	0.000888003	0.0659995
	chr11	12088476	12094561	+	RP13-631K18.3-001	ENST00000476130.2	149.702	376.627	2.51584	1.33104	0.00137496	0.0992724

## Sheet: MCF7 - ncRNA
GRO-seq - MCF7 - DESeq2 Results (Nutlin vs. DMSO) - ncRNA - padj < 0.05
	Chromosome	Start	End	Strand	Transcript ID	Ensembl ID	Base Mean DMSO	Base Mean Nutlin	Fold Change	Fold Change (log2)	p	padj
	chr12	2113832	2120558	+	RP5-1096D14.6-001	ENST00000354425.4	27.6553	319.278	11.5449	3.52918	2.52013e-22	8.51803e-19
	chr8	95962453	95963624	+	RP11-347C18.3-002	ENST00000519034.1	146.594	710.1	4.84399	2.2762	4.45432e-18	7.5278e-15
	chr1	201433511	201434274	-	RP11-134G8.8-001	ENST00000430471.1	152.637	690.898	4.5264	2.17836	7.52197e-17	8.47475e-14
	chr12	69221898	69222333	+	RP11-611O2.1-001	ENST00000544710.1	43.5122	261.994	6.02116	2.59004	1.78699e-12	1.51001e-09
	chr4	90602663	90615087	+	RP11-115D19.1-004	ENST00000513572.1	15.8568	154.396	9.73689	3.28346	5.85579e-12	3.95851e-09
	chr1	9242263	9252148	+	RP3-510D11.2-001	ENST00000412639.2	437.518	1225.41	2.80082	1.48585	8.68279e-11	4.89131e-08
	chr9	94909874	94910588	+	LINC00475-002	ENST00000421234.1	34.6083	197.077	5.69451	2.50957	1.57284e-10	7.59455e-08
	chr8	22863894	22876848	-	RP11-875O11.1-001	ENST00000502083.2	238.684	677.268	2.83751	1.50463	6.99904e-08	2.95709e-05
	chr16	53069602	53086785	-	RP11-467J12.4-001	ENST00000562178.1	76.4433	253.09	3.31082	1.72719	1.9579e-07	7.35301e-05
	chr5	43006835	43007645	-	CTD-2201E18.5-001	ENST00000607715.1	167.066	460.952	2.75909	1.46419	3.56076e-07	0.000120354
	chr6	111804714	111814206	+	TRAF3IP2-AS1-007	ENST00000532226.1	528.83	1144.73	2.16465	1.11414	3.38841e-06	0.00104117
	chr5	27472399	27486253	+	LINC01021-004	ENST00000512067.1	27.8069	124.103	4.46301	2.15802	4.05059e-06	0.00114092
	chr18	653985	657259	-	RP11-806L2.5-001	ENST00000584679.1	75.8126	224.668	2.96346	1.56728	1.3003e-05	0.00338078
	chr17	65240953	65241922	+	RP11-401F2.3-001	ENST00000585193.1	220.759	482.095	2.18381	1.12685	1.92381e-05	0.00464463
	chr19	49467247	49468286	+	CTD-2639E6.9-002	ENST00000594305.1	118.23	288.836	2.44301	1.28866	2.56328e-05	0.00577592
	chr1	112282475	112289235	+	RP4-773A18.4-002	ENST00000524935.1	97.5271	243.139	2.49304	1.31791	4.64019e-05	0.0098024
	chr22	30642194	30642987	+	RP1-102K2.8-001	ENST00000608354.1	77.3871	205.033	2.64944	1.40569	8.99621e-05	0.0178866
	chr7	30589833	30591185	+	RP4-777O23.1-001	ENST00000579437.1	9.92092	58.9355	5.94052	2.57059	0.000178221	0.0334659
	chr8	128808208	128808274	+	PVT1-201	ENST00000408388.1	56.8558	150.016	2.63854	1.39974	0.000381191	0.0644214
	chr19	19884687	19887232	-	LINC00663-002	ENST00000586885.1	207.899	414.396	1.99326	0.995127	0.000363542	0.0644214
	chr10	90775593	90776816	+	RP11-399O19.9-001	ENST00000562983.1	2.28342	35.235	15.4308	3.94774	0.000400398	0.0644451
	chr10	132893481	132894040	+	RP11-462G8.3-001	ENST00000436942.1	3.88232	38.618	9.94714	3.31428	0.000496823	0.07633

## Sheet: SJSA - ncRNA
GRO-seq - SJSA - DESeq2 Results (Nutlin vs. DMSO) - ncRNA - padj < 0.05
	Chromosome	Start	End	Strand	Transcript ID	Ensembl ID	Base Mean DMSO	Base Mean Nutlin	Fold Change	Fold Change (log2)	p	padj
	chr1	9242263	9252148	+	RP3-510D11.2-001	ENST00000412639.2	426.143	2752.29	6.45861	2.69122	3.00845e-33	1.23377e-29
	chr12	69221898	69222333	+	RP11-611O2.1-001	ENST00000544710.1	1402.8	6439.6	4.59053	2.19866	7.19909e-23	1.47617e-19
	chr8	95962453	95963624	+	RP11-347C18.3-002	ENST00000519034.1	201.381	929.272	4.61449	2.20617	2.65372e-16	3.62763e-13
	chr1	201433511	201434274	-	RP11-134G8.8-001	ENST00000430471.1	98.6502	480.856	4.87435	2.28521	4.35113e-14	4.46099e-11
	chr5	180618046	180618852	-	CTC-338M12.2-001	ENST00000513771.1	6081.27	1891.45	0.311029	-1.68488	4.54793e-12	3.73021e-09
	chr5	173756615	173757506	+	CTC-430J12.2-001	ENST00000503317.1	1.65095	93.9242	56.8909	5.83012	1.83428e-09	1.25373e-06
	chr16	53069602	53086785	-	RP11-467J12.4-001	ENST00000562178.1	82.1291	329.683	4.0142	2.00511	4.04888e-09	2.37207e-06
	chr9	94909874	94910588	+	LINC00475-002	ENST00000421234.1	74.8622	290.176	3.87614	1.95462	8.34911e-08	4.27996e-05
	chr8	22863894	22876848	-	RP11-875O11.1-001	ENST00000502083.2	1821.47	3914.8	2.14926	1.10384	1.61186e-07	7.3447e-05
	chr6	36354608	36359771	+	RP1-50J22.4-001	ENST00000411643.1	112.904	349.233	3.09318	1.62909	3.93691e-07	0.000161453
	chr3	45720724	45730626	-	LIMD1-AS1-002	ENST00000429798.1	5751.73	2692.99	0.468205	-1.09479	7.76694e-07	0.000289565
	chr5	135416186	135416286	-	VTRNA2-1-201	ENST00000365160.1	594.249	272.676	0.458857	-1.12388	3.07305e-05	0.0105022
	chr3	193773268	193776178	-	RP11-407B7.1-014	ENST00000601524.1	66.9101	192.572	2.87807	1.5251	9.35683e-05	0.0295172
	chr19	49467247	49468286	+	CTD-2639E6.9-002	ENST00000594305.1	447.129	872.747	1.95189	0.964871	0.000101825	0.0298274
	chr10	90775593	90776816	+	RP11-399O19.9-001	ENST00000562983.1	17.7303	93.3486	5.26491	2.39641	0.000112248	0.0306886
