# Supplementary material for: Identification of a core TP53 transcriptional program with highly distributed tumor suppressive activity
Source: HighWire-hosted journal article supplement (doi:10.1101/gr.220533.117), 2017-09-13
Supplement: Supplemental_File_S2_Total_RNAseq_data.xlsx [file Supplemental_File_S2_Total_RNAseq_data.xlsx]

## Sheet: HCT116
Total RNA-seq - HCT116 - DESeq2 Results (Nutlin vs. DMSO) - Refseq genes - padj < 0.05
	Gene ID	Base Mean DMSO	Base Mean Nutlin	Fold Change	Fold Change (log2)	p	padj
	CDKN1A	5449.81	128852	22.4975	4.49169	0	0
	TP53I3	329.124	9997.23	27.6582	4.78963	0	0
	MDM2	2964.89	46196.4	14.812	3.8887	5.38579e-298	2.35808e-294
	GDF15	1723.46	37460	20.277	4.34177	9.04074e-282	2.96875e-278
	BTG2	640.422	9786	14.3195	3.83991	1.58543e-212	4.16492e-209
	TP53INP1	169.004	3355.06	17.6685	4.14311	2.80193e-159	6.13389e-156
	DDIT4	874.121	7830.35	8.47064	3.08247	3.34681e-145	6.28006e-142
	SERPINB5	742.169	7595.51	9.5227	3.25137	5.58292e-128	9.16646e-125
	BBC3	414.256	3968.57	8.90681	3.15491	2.86683e-111	4.18398e-108
	CYFIP2	2335.7	13549.1	5.61622	2.4896	7.7768e-108	1.02148e-104
	FDXR	3000.31	22822	7.21672	2.85134	1.07064e-106	1.27844e-103
	SESN1	351.37	3221.82	8.46432	3.08139	6.68889e-99	7.32154e-96
	EPS8L2	5089.43	23819.8	4.54576	2.18452	8.50485e-87	8.59317e-84
	PLXNB3	234.156	2321.05	8.99581	3.16925	1.26357e-86	1.1855e-83
	FAS	728.872	4381.3	5.71431	2.51458	2.29166e-82	2.00673e-79
	SERPINE1	1278.86	6486.13	4.88311	2.2878	2.23678e-81	1.83625e-78
	RINL	329.374	2726.89	7.5909	2.92427	1.92272e-79	1.48559e-76
	RRM2B	1538.02	7467.99	4.66782	2.22275	3.06774e-78	2.2386e-75
	AHNAK2	1635.92	8103.83	4.72139	2.23921	5.21454e-76	3.60489e-73
	PTPRE	518.339	3634.81	6.57731	2.7175	9.99018e-74	6.56105e-71
	NEAT1	14093.2	49221.2	3.42272	1.77514	9.20423e-72	5.75703e-69
	GPR87	117.455	1479.8	10.7073	3.42053	1.06009e-71	6.32922e-69
	HES2	481.499	2920.33	5.70046	2.51108	1.22566e-67	6.99957e-65
	FAM212B	248.477	2375.87	8.52458	3.09163	3.68254e-67	2.01542e-64
	ABCA12	12.4542	720.369	28.2225	4.81877	1.28089e-64	6.72979e-62
	CCNA2	9670.97	2417.96	0.256387	-1.96361	5.9678e-63	3.01488e-60
	SYTL1	576.766	3104.16	5.09655	2.34952	2.29078e-62	1.11442e-59
	PLK3	1882.41	7562.83	3.89913	1.96315	8.53596e-62	4.00428e-59
	RPS27L	1793.83	7485.53	4.0199	2.00716	2.16993e-61	9.82827e-59
	INPP5D	24.9513	750.195	19.2459	4.26648	1.34378e-60	5.88353e-58
	DGKA	1162.93	5052.13	4.1774	2.0626	2.14809e-60	8.81725e-58
	TNFRSF10B	6084.82	20281.4	3.26267	1.70605	2.14588e-60	8.81725e-58
	ARHGAP11A	6941.83	1848.08	0.274704	-1.86405	6.32998e-57	2.51952e-54
	HJURP	5013.78	1198.91	0.249446	-2.0032	9.12498e-57	3.5252e-54
	PLK1	13713.5	3567.15	0.26561	-1.91262	4.30718e-56	1.61642e-53
	POLH	1433.19	5680.63	3.83161	1.93795	1.031e-55	3.76173e-53
	MCM10	4699.1	1055.06	0.23415	-2.09449	2.87403e-55	1.02028e-52
	BUB1	8586.92	2448.66	0.292352	-1.77422	5.80372e-55	2.0061e-52
	KIF23	9277.86	2636.81	0.290942	-1.7812	1.18169e-54	3.97985e-52
	ATAD2	13703.5	4076.62	0.304573	-1.71514	3.65875e-54	1.20144e-51
	APOBEC3C	688.695	3223.08	4.46549	2.15882	4.65925e-54	1.49266e-51
	CMBL	2286.48	8292.41	3.53011	1.81971	4.88747e-54	1.5285e-51
	CCNB1	21948.7	6393.19	0.296186	-1.75542	6.53153e-54	1.99515e-51
	CD82	243.746	1793.74	6.65149	2.73368	3.00383e-52	8.96711e-50
	TMEM63B	2706.59	9116.14	3.28621	1.71643	3.32905e-51	9.71713e-49
	DDB2	1923.58	6714.28	3.39436	1.76314	1.15039e-50	3.28485e-48
	GPR56	890.915	4380.16	4.66132	2.22074	4.9579e-50	1.38558e-47
	DUOX1	563.373	2863.08	4.82536	2.27064	9.17139e-50	2.50971e-47
	ZMAT3	721.074	3139.81	4.15186	2.05376	2.10458e-49	5.64156e-47
	BUB1B	8103.29	2450.97	0.310726	-1.68629	2.49529e-49	6.55512e-47
	CDCA5	8768.32	2625.3	0.306342	-1.70679	1.2353e-48	3.18151e-46
	CEP55	4905.2	1344.37	0.283197	-1.82012	1.4189e-48	3.5841e-46
	KDM4B	1373.02	5165.48	3.64748	1.8669	2.04718e-48	5.07353e-46
	KIF20A	8085.47	2341.58	0.296514	-1.75383	2.28836e-48	5.56623e-46
	SFN	11519.3	37253.7	3.17344	1.66605	4.18101e-48	9.98501e-46
	EFNB1	1393.27	4964.46	3.45321	1.78794	2.41685e-47	5.47334e-45
	EXO1	2936.75	675.264	0.241319	-2.05099	2.3862e-47	5.47334e-45
	MSH6	4607.61	1193.81	0.269432	-1.89201	2.39302e-47	5.47334e-45
	CDCA2	2824.04	646.596	0.24091	-2.05343	9.9277e-47	2.21018e-44
	CDCA8	6597.01	2004.42	0.312296	-1.67901	1.49798e-46	3.27933e-44
	DRAM1	808.868	3285.02	3.88962	1.95963	2.03826e-46	4.38894e-44
	HSPG2	1257.3	5173.56	4.01944	2.00699	2.33002e-46	4.93625e-44
	KIFC1	7598.51	2323.75	0.312747	-1.67693	5.25999e-46	1.07953e-43
	ORC1	3639.23	844.352	0.242988	-2.04105	5.19085e-46	1.07953e-43
	AREG	1187.6	4299.92	3.5014	1.80793	1.18476e-45	2.35785e-43
	PRC1	15214.2	5297.26	0.354723	-1.49524	1.18198e-45	2.35785e-43
	ADAMTS7	293.799	1841.02	5.74695	2.5228	1.273e-45	2.49565e-43
	ASTN2	166.321	1261.05	6.68322	2.74054	2.37275e-45	4.58326e-43
	KIF2C	10940.7	3177.95	0.297543	-1.74883	2.69424e-45	5.12883e-43
	LRP10	2105.24	7222.64	3.33127	1.73607	4.14729e-45	7.7821e-43
	ANLN	11691.1	4010.96	0.349883	-1.51506	1.60592e-44	2.97094e-42
	PHLDA3	862.782	4063.19	4.42959	2.14717	2.80893e-44	5.12435e-42
	CLSPN	2843.8	628.583	0.233459	-2.09876	5.10392e-44	9.18356e-42
	KCNJ2	3829.69	1041.08	0.282153	-1.82545	6.55577e-44	1.16365e-41
	MYBL2	11254.8	3508.62	0.320065	-1.64356	8.1452e-44	1.4265e-41
	NADSYN1	1293.61	4499.4	3.36615	1.7511	8.74088e-44	1.51068e-41
	CDC6	8309.3	2544.35	0.313915	-1.67155	8.87976e-44	1.51475e-41
	RRM2	24595.3	9181.13	0.379112	-1.3993	6.83033e-43	1.15021e-40
	NCAPH	7590.96	2347.33	0.316726	-1.65869	2.322e-42	3.8607e-40
	NLRP1	153.29	1136.21	6.53125	2.70736	4.53568e-42	7.44702e-40
	LMNB1	9653.62	3084.64	0.326675	-1.61407	7.96162e-42	1.29106e-39
	CDT1	8501.43	2405.98	0.292187	-1.77504	1.02476e-41	1.6415e-39
	CENPF	13446.1	4858.91	0.368095	-1.44185	2.38681e-41	3.7772e-39
	DTL	3113.03	543.542	0.192488	-2.37716	5.43792e-41	8.50323e-39
	SESN2	738.714	2949.42	3.8119	1.93051	7.5915e-41	1.17311e-38
	LPIN3	845.021	3174.34	3.61623	1.85449	1.03371e-40	1.57881e-38
	ZNF367	2006.5	291.117	0.16422	-2.6063	1.30703e-40	1.97332e-38
	KIAA0247	615.056	2597.92	4.0058	2.00209	1.99866e-40	2.98322e-38
	ABCA1	19.2962	486.429	14.5193	3.8599	3.04704e-40	4.49695e-38
	NCAPG	7223.02	2393.07	0.340093	-1.556	3.24248e-40	4.73221e-38
	CDC25A	3566.83	815.401	0.241773	-2.04828	5.03582e-40	7.26874e-38
	KIF11	4176.49	1236.32	0.305198	-1.71218	5.65534e-40	8.07423e-38
	E2F2	2280.5	443.281	0.211422	-2.2418	5.025e-39	7.09714e-37
	SGOL2	2459.49	611.192	0.261032	-1.9377	5.44622e-39	7.61022e-37
	MXD4	374.511	1773.29	4.42938	2.1471	8.55574e-39	1.18294e-36
	FBXO5	1905.31	421.469	0.236296	-2.08133	1.60496e-38	2.19595e-36
	NDC80	3202.82	894.537	0.291392	-1.77897	1.95513e-38	2.64748e-36
	PTAFR	112.965	906.024	6.79268	2.76398	3.37712e-38	4.52637e-36
	TAP1	2408.92	7087.79	2.86899	1.52054	3.70862e-38	4.92048e-36
	TPX2	17065.7	6526.13	0.389749	-1.35938	4.46496e-38	5.86472e-36
	GINS2	5209.85	1608.58	0.31766	-1.65444	1.20919e-37	1.57255e-35
	PLK4	2685.05	705.632	0.275366	-1.86058	1.53321e-37	1.97439e-35
	ANKRA2	283.156	1458.32	4.73049	2.24199	1.8455e-37	2.35346e-35
	MCM6	17511.2	6888.59	0.399853	-1.32246	3.5816e-37	4.52349e-35
	PPM1D	1442.62	4609.49	3.09687	1.63081	1.87922e-36	2.35081e-34
	GADD45A	1673.17	4961.72	2.88784	1.52999	5.15463e-36	6.38736e-34
	KPNA2	36263.1	14561.4	0.410192	-1.28563	1.26651e-35	1.55473e-33
	FAM83D	5461.49	1892.08	0.354977	-1.4942	1.75933e-35	2.13971e-33
	PGPEP1	507.653	2028.43	3.78132	1.91889	2.86771e-35	3.45572e-33
	AURKA	3408.18	1040.02	0.316811	-1.65831	3.08822e-35	3.68761e-33
	HMMR	4047.9	1260.05	0.320323	-1.6424	4.18962e-35	4.95771e-33
	MKI67	56397.4	19178.1	0.344855	-1.53594	4.60368e-35	5.39905e-33
	TACC3	10527	3910.74	0.378088	-1.40321	8.18107e-35	9.50959e-33
	IKBIP	897.239	3042.46	3.25989	1.70482	8.64023e-35	9.95521e-33
	BAX	3377.73	9256.56	2.6849	1.42487	1.14835e-34	1.31162e-32
	MCM3	24486.1	9560.71	0.397314	-1.33165	1.33002e-34	1.50602e-32
	CDC20	18683.1	6120.51	0.333062	-1.58614	1.62479e-34	1.82407e-32
	WDR76	2352.9	563.795	0.255359	-1.9694	1.97649e-34	2.2001e-32
	SKA3	3282.33	1011.63	0.319617	-1.64559	2.3283e-34	2.56993e-32
	PANK1	188.46	1114.96	5.24607	2.39124	3.45829e-34	3.78538e-32
	MCM4	20824.9	7583.07	0.371211	-1.42969	5.38495e-34	5.84556e-32
	SMC4	8028.43	3070.15	0.390308	-1.35732	4.13244e-33	4.44915e-31
	PROM2	115.291	921.251	6.69414	2.7429	7.46427e-33	7.97099e-31
	UNG	5597.63	1847.82	0.339321	-1.55928	8.09982e-33	8.57993e-31
	SHCBP1	3456.21	1121.51	0.33519	-1.57695	9.65441e-33	1.01449e-30
	CHAF1A	6950.41	2001.43	0.300165	-1.73617	1.09101e-32	1.13734e-30
	ADCK3	1788.39	5072.66	2.76349	1.46649	1.15508e-32	1.19465e-30
	XPC	2564.4	6770.01	2.58326	1.36919	2.02485e-32	2.07784e-30
	CCNF	6954.08	2390.14	0.351081	-1.51012	2.49476e-32	2.5402e-30
	DLGAP5	5497.49	1835.22	0.342669	-1.54511	2.93009e-32	2.96052e-30
	TTK	3117.14	952.496	0.31841	-1.65104	3.66261e-32	3.6724e-30
	STIL	2784.55	808.766	0.302424	-1.72536	5.98409e-32	5.95463e-30
	APAF1	435.509	1746.68	3.76533	1.91278	6.43328e-32	6.35347e-30
	AURKB	6466.62	2408.26	0.379645	-1.39728	9.93219e-32	9.73577e-30
	PLXNB1	1909.93	5206.11	2.6609	1.41191	1.05101e-31	1.02259e-29
	LAMA3	183.007	1120.73	5.32967	2.41405	1.50544e-31	1.44929e-29
	RACGAP1	8354.48	3257.27	0.398499	-1.32735	1.51163e-31	1.44929e-29
	CKAP2L	2137.84	585.191	0.286966	-1.80105	1.65676e-31	1.57692e-29
	UBE2T	4880.99	1761.78	0.370434	-1.43271	2.05878e-31	1.94547e-29
	TNFRSF10C	74.6776	667.171	7.11518	2.8309	2.16786e-31	2.03392e-29
	TEP1	1566.14	4415.64	2.74563	1.45714	2.2757e-31	2.11995e-29
	KIF4A	3419.86	1133.85	0.341885	-1.54841	4.40408e-31	4.07378e-29
	CDCA4	5493.53	1893.97	0.352767	-1.50321	5.00318e-31	4.59558e-29
	DSCC1	3193.54	1023.62	0.332223	-1.58978	7.3039e-31	6.66227e-29
	RFWD3	7407.78	2885.19	0.398292	-1.3281	9.43756e-31	8.54913e-29
	UNC5B-AS1	8.88906	323.836	14.2437	3.83225	1.33183e-30	1.19819e-28
	CYP4F11	1143.09	3383.87	2.86648	1.51928	2.01532e-30	1.80076e-28
	FOXM1	11525.9	4410.68	0.388488	-1.36406	2.13164e-30	1.89183e-28
	CCNE2	1422.56	224.228	0.183428	-2.44671	2.91884e-30	2.57308e-28
	ARVCF	1508.37	4197.3	2.71409	1.44047	3.92584e-30	3.43773e-28
	CKAP2	4865.87	1749.94	0.369873	-1.4349	4.62657e-30	4.0245e-28
	E2F8	2376.92	642.659	0.284751	-1.81222	6.59102e-30	5.6956e-28
	SPAG5	8659.19	3350.91	0.393613	-1.34515	1.35704e-29	1.16502e-27
	UBE2C	8500.82	3467.9	0.416438	-1.26383	1.43818e-29	1.22666e-27
	SLBP	8908.23	3669.04	0.419206	-1.25427	1.49997e-29	1.2711e-27
	TMPO	10386	4373.13	0.428051	-1.22414	1.7585e-29	1.48063e-27
	NINJ1	1075.23	3432.49	3.07137	1.61888	2.9127e-29	2.43684e-27
	MCMBP	16084	7030.92	0.443674	-1.17243	2.9792e-29	2.47669e-27
	USP1	3422.88	1185.51	0.357126	-1.48549	3.66086e-29	3.02424e-27
	RFC5	6241.55	2416.99	0.39559	-1.33792	3.8257e-29	3.14066e-27
	MCM2	15548.5	5782.96	0.378916	-1.40005	3.95007e-29	3.22262e-27
	UHRF1	5364.07	1906.64	0.364573	-1.45572	4.47668e-29	3.6297e-27
	ERCC6L	1794.15	491.666	0.289545	-1.78814	6.50857e-29	5.24479e-27
	MKNK2	3461.09	8438.49	2.38534	1.25419	6.96725e-29	5.58017e-27
	ESPL1	5993.38	2362.79	0.401735	-1.31569	1.4539e-28	1.15739e-26
	KNSTRN	4866.87	1818.65	0.384186	-1.38012	1.5541e-28	1.22971e-26
	ORC6	2555.25	800.728	0.325702	-1.61838	1.56442e-28	1.23046e-26
	ABHD4	443.564	1684.74	3.57538	1.8381	1.62125e-28	1.26756e-26
	CDCA3	2999.44	1010.65	0.347692	-1.52412	1.65281e-28	1.28459e-26
	GPSM2	3598.4	1265.7	0.362631	-1.46343	1.87674e-28	1.44158e-26
	KCNN4	2036.04	5324.2	2.55377	1.35263	1.86727e-28	1.44158e-26
	ARAP1	3353.27	8037.75	2.35419	1.23523	2.59116e-28	1.97877e-26
	TRAF4	4845.93	11355.5	2.30404	1.20417	2.67916e-28	2.03415e-26
	NEK2	2543.67	703.553	0.290309	-1.78434	2.6952e-28	2.03456e-26
	EPN3	474.723	1931.14	3.83134	1.93785	2.87181e-28	2.1555e-26
	PSTPIP2	1654.11	4421.93	2.60387	1.38066	3.68582e-28	2.75075e-26
	DEPDC1	2167.74	657.76	0.317863	-1.65352	4.01065e-28	2.97626e-26
	MAD2L1	5973.74	2377.68	0.407326	-1.29574	7.1898e-28	5.30551e-26
	PVRL4	27.9231	423.697	9.34831	3.22471	7.71581e-28	5.66186e-26
	CES2	1589.35	4475.57	2.73638	1.45227	1.10171e-27	8.03939e-26
	FEN1	9374.5	3642.24	0.394637	-1.3414	1.19098e-27	8.64284e-26
	FAM210B	371.2	1519.48	3.78386	1.91986	1.41821e-27	1.02353e-25
	RHOD	1587.8	4261.14	2.61065	1.38441	1.87794e-27	1.34791e-25
	CCNG1	3333.09	7871.74	2.32153	1.21508	2.45717e-27	1.75407e-25
	MAP3K12	779.299	2479.05	3.08398	1.62479	4.36727e-27	3.10076e-25
	EZH2	5659.51	2265.94	0.408798	-1.29054	4.99497e-27	3.52736e-25
	GRIN2C	38.3945	446.383	8.07042	3.01264	5.195e-27	3.649e-25
	ASPM	3527.33	1295.08	0.377721	-1.40461	5.92436e-27	4.13917e-25
	BIRC5	11765.3	4415.8	0.37999	-1.39597	6.5725e-27	4.56771e-25
	BRCA1	3384.26	1224.32	0.372388	-1.42512	7.06868e-27	4.88669e-25
	PIF1	1819.43	526	0.30377	-1.71895	8.01428e-27	5.51139e-25
	ARL6IP1	11463.3	5027.99	0.444358	-1.1702	1.1705e-26	8.00758e-25
	ITPKC	869.123	2622.39	2.9031	1.53759	1.34448e-26	9.15012e-25
	PRR11	5103.61	2002.94	0.40131	-1.31721	1.46001e-26	9.88519e-25
	CLDN4	3946.69	9070.29	2.25899	1.17568	1.50735e-26	1.01534e-24
	ACER2	114.328	757.814	5.54381	2.47088	1.53511e-26	1.02876e-24
	RALGDS	1729.82	4549.01	2.56849	1.36092	1.56611e-26	1.04421e-24
	ZNF337	844.675	2604.85	2.95617	1.56373	1.68576e-26	1.11831e-24
	EPPK1	1801.6	4857.87	2.63086	1.39553	1.91966e-26	1.26707e-24
	RAD51	2134.41	616.293	0.30366	-1.71947	1.96136e-26	1.28812e-24
	NDRG1	1997.01	4986.43	2.44126	1.28763	2.52137e-26	1.64767e-24
	ZBTB2	1750.44	508.295	0.305909	-1.70883	2.93337e-26	1.90741e-24
	RETSAT	2511.31	6086.03	2.37287	1.24663	5.24421e-26	3.39323e-24
	ALOX5	21.2098	352.946	9.59657	3.26252	7.74205e-26	4.98489e-24
	NUSAP1	8330.1	3551.16	0.435016	-1.20086	9.70466e-26	6.21808e-24
	WEE1	2654.61	869.171	0.34024	-1.55538	1.05337e-25	6.71653e-24
	KIF15	2014.47	627.534	0.326074	-1.61673	1.06788e-25	6.77616e-24
	TUBA1C	40637.9	19505.2	0.486101	-1.04067	1.21968e-25	7.70216e-24
	LRRC45	3606.05	1300.77	0.372194	-1.42587	1.65972e-25	1.04308e-23
	KDM5B	708.16	2220.71	2.99006	1.58017	4.20583e-25	2.63065e-23
	SULF2	350.913	5363.28	9.10041	3.18593	7.22347e-25	4.4967e-23
	KIF14	2689.54	958.917	0.369094	-1.43794	1.02762e-24	6.36687e-23
	ZWINT	7771.95	3443.1	0.450268	-1.15115	1.14013e-24	7.03083e-23
	TUBB4B	52821.3	24124	0.459998	-1.1203	1.36584e-24	8.38332e-23
	ZNF219	449.963	1612.86	3.37424	1.75456	1.43729e-24	8.78083e-23
	FBXO44	2219.25	5258.02	2.32485	1.21714	2.19632e-24	1.33559e-22
	CENPO	4166.89	1621.59	0.398164	-1.32856	2.2292e-24	1.34934e-22
	MELK	4365.15	1689.59	0.398141	-1.32865	2.88175e-24	1.73632e-22
	CCNB2	4541.99	1691.44	0.383067	-1.38433	3.6078e-24	2.16385e-22
	MUC19	23.7645	360.612	8.7687	3.13236	3.81249e-24	2.27623e-22
	INCENP	6514.98	2836.34	0.442165	-1.17734	4.14481e-24	2.46344e-22
	PSRC1	3471.65	1245.25	0.367779	-1.44309	5.12518e-24	3.0324e-22
	MCM7	37495.4	18028.9	0.485658	-1.04199	5.98537e-24	3.52546e-22
	TOB1	1954.59	4720.18	2.36068	1.2392	7.32811e-24	4.29709e-22
	RFC4	4022.12	1628.65	0.414523	-1.27047	8.39081e-24	4.89837e-22
	CHEK1	2745.88	1014.63	0.381344	-1.39083	9.62435e-24	5.59362e-22
	ICAM5	995.393	2934.33	2.86162	1.51683	9.84331e-24	5.69568e-22
	PHF19	5527.73	2214.86	0.409856	-1.28681	1.04324e-23	6.01004e-22
	FBXO22	2065.88	4884.42	2.31667	1.21205	1.05849e-23	6.07127e-22
	ECT2	5697.87	2439.78	0.436891	-1.19465	1.8603e-23	1.06239e-21
	ESCO2	1754.05	557.248	0.33335	-1.58489	1.95266e-23	1.11031e-21
	BLCAP	1447.27	3632.33	2.45005	1.29281	2.59826e-23	1.47104e-21
	GTSE1	3895.96	1392.21	0.365232	-1.45311	3.32873e-23	1.87652e-21
	NASP	10291	4822.25	0.475393	-1.07281	3.62981e-23	2.0375e-21
	KIF18B	4504.1	1862.65	0.42119	-1.24746	4.51739e-23	2.52493e-21
	DNAJC9	3618.63	1430.43	0.405655	-1.30168	4.67439e-23	2.60162e-21
	ANXA4	1500.15	3701.55	2.4115	1.26993	4.93883e-23	2.7372e-21
	PSMC3IP	1829.45	514.201	0.298892	-1.7423	6.16193e-23	3.40071e-21
	BTBD19	35.3155	405.93	7.46473	2.90009	7.08473e-23	3.89364e-21
	SOX9	1443.12	3568.67	2.41126	1.26979	7.5444e-23	4.12899e-21
	POLD3	1653.77	484.112	0.310827	-1.68582	9.40262e-23	5.12462e-21
	VPS13C	906.303	2487.57	2.64447	1.40298	9.75344e-23	5.29386e-21
	PLEKHG1	166.321	800.611	4.26046	2.09101	9.80329e-23	5.29902e-21
	PLCD3	4664.78	9986.17	2.1083	1.07608	1.02551e-22	5.52051e-21
	OR51B4	454.057	1495.36	3.11155	1.63763	1.17581e-22	6.3038e-21
	HMGB2	18602	9089.56	0.495351	-1.01348	1.29861e-22	6.93382e-21
	C12orf5	918.394	2480.64	2.61343	1.38595	1.5164e-22	8.06391e-21
	GATS	228.496	961.19	3.83953	1.94093	2.6466e-22	1.40174e-20
	ACTA2	136.648	809.461	4.93943	2.30434	2.71108e-22	1.43012e-20
	MASTL	1565.69	493.145	0.331899	-1.59119	3.94583e-22	2.07314e-20
	ZNF79	279.545	1141.72	3.73383	1.90066	4.00037e-22	2.09342e-20
	SAPCD2	11326.8	5319.94	0.475341	-1.07296	4.9282e-22	2.56873e-20
	CENPA	1321.68	378.045	0.304675	-1.71466	5.01184e-22	2.602e-20
	MT1E	12181	25917.6	2.0996	1.07012	5.30816e-22	2.74499e-20
	MT2A	11247.9	24083.4	2.11389	1.0799	8.40805e-22	4.33097e-20
	HNRNPDL	20932.1	10233.7	0.496427	-1.01035	9.40302e-22	4.82456e-20
	RFX5	1736.55	4077.65	2.29493	1.19845	9.68382e-22	4.9493e-20
	NCAPD3	7720.23	3613.56	0.475368	-1.07288	1.01216e-21	5.15299e-20
	DNMT1	21062	10206.4	0.489584	-1.03037	1.06881e-21	5.42042e-20
	GJB5	274.009	1099.53	3.65293	1.86905	1.1001e-21	5.55762e-20
	KIF18A	2131.95	727.846	0.357512	-1.48394	1.51068e-21	7.60258e-20
	UBR7	3522.51	1455.6	0.423484	-1.23962	1.77667e-21	8.90709e-20
	PNRC1	185.543	891.936	4.28038	2.09774	1.89228e-21	9.4506e-20
	COL4A5	636.976	1839.33	2.77078	1.47029	2.15967e-21	1.07452e-19
	NDRG4	188.867	848.362	4.04051	2.01454	2.24274e-21	1.11164e-19
	RFC2	4716.28	2082.47	0.450331	-1.15094	2.53834e-21	1.25343e-19
	ASF1B	4637.05	1755.42	0.389941	-1.35867	2.66666e-21	1.31186e-19
	CDKN3	2466.44	912.122	0.382582	-1.38616	2.91573e-21	1.42372e-19
	CYP4F3	47.5028	412.495	6.3176	2.65938	2.90711e-21	1.42372e-19
	SMC3	5888.34	2511.49	0.436041	-1.19746	2.99283e-21	1.45596e-19
	WHSC1	14773.2	7228.48	0.495765	-1.01227	3.22237e-21	1.56184e-19
	KCTD11	350.238	1267.14	3.37964	1.75687	4.48426e-21	2.16547e-19
	H2AFZ	14888	7376.3	0.502295	-0.993394	4.86746e-21	2.34191e-19
	SPDL1	2164.61	799.301	0.382706	-1.38569	5.39572e-21	2.5866e-19
	MAPKBP1	2011.39	4538.2	2.21237	1.1456	6.61222e-21	3.15824e-19
	GSG2	1266.74	341.138	0.290887	-1.78147	7.87164e-21	3.74616e-19
	DONSON	2012.05	712.154	0.36949	-1.43639	8.26831e-21	3.92073e-19
	PRIM1	2884.28	1162.59	0.414412	-1.27086	9.23684e-21	4.3486e-19
	TIPIN	1862.44	657.353	0.367811	-1.44296	9.21735e-21	4.3486e-19
	WDR63	32.9586	370.021	7.23744	2.85548	1.00742e-20	4.72587e-19
	RFC1	5888.77	2713.79	0.468941	-1.09252	1.02215e-20	4.77793e-19
	ABCB6	1470.21	3572.22	2.36964	1.24467	1.04661e-20	4.87489e-19
	RAD21	20670.6	10542.6	0.515761	-0.955225	1.12338e-20	5.214e-19
	POLE2	1654.05	544.908	0.346572	-1.52877	1.14577e-20	5.29918e-19
	DEK	6195.03	2647.52	0.437484	-1.1927	1.25196e-20	5.77001e-19
	ISYNA1	8719.81	17478.3	1.97869	0.984543	1.31881e-20	6.05683e-19
	RFC3	3391.05	1374.99	0.417167	-1.2613	2.40416e-20	1.1003e-18
	GBE1	1137.23	2833.23	2.419	1.27441	2.57802e-20	1.17577e-18
	TOP2A	11399.7	4938.46	0.446967	-1.16176	2.92066e-20	1.32743e-18
	RECQL4	12640.5	6179.17	0.494508	-1.01594	3.78943e-20	1.71635e-18
	BORA	2045.87	700.555	0.360815	-1.47067	4.07424e-20	1.83901e-18
	CASC5	2502.26	977.773	0.40421	-1.30682	4.22678e-20	1.90133e-18
	MICALL1	1528.04	3773.6	2.39732	1.26142	5.32594e-20	2.38759e-18
	TONSL	8355.85	3476.22	0.425281	-1.23351	6.08465e-20	2.71843e-18
	GINS3	1692.42	573.864	0.354967	-1.49424	6.98788e-20	3.11138e-18
	HNRNPAB	27459.2	14380	0.52866	-0.919589	8.58647e-20	3.81025e-18
	STX6	1661.15	3870.68	2.27498	1.18585	1.01519e-19	4.48974e-18
	STAT3	3246.57	6751.32	2.0477	1.034	1.04363e-19	4.60002e-18
	GMNN	2893.65	1198.63	0.425878	-1.23149	1.10774e-19	4.86628e-18
	CLN8	1565.59	3577.1	2.23393	1.15958	1.48094e-19	6.48407e-18
	KIAA1524	2804.95	1159.74	0.42474	-1.23535	1.53007e-19	6.6769e-18
	FUCA1	943.446	2410.9	2.48043	1.31059	1.62955e-19	7.08748e-18
	PGAP1	423.188	1322.89	2.95489	1.5631	1.76741e-19	7.66171e-18
	EME1	2222.57	809.59	0.378018	-1.40347	1.89987e-19	8.20881e-18
	TICRR	2413.44	894.674	0.383464	-1.38284	1.92438e-19	8.28746e-18
	MGRN1	2323.5	4995.75	2.11217	1.07872	2.27794e-19	9.778e-18
	GPC1	9325.86	18748.5	1.98069	0.986002	3.06663e-19	1.31206e-17
	PTGES	683.924	1976.47	2.78617	1.47828	3.39598e-19	1.44825e-17
	PKMYT1	7284.31	3058.19	0.424427	-1.23641	3.98371e-19	1.6934e-17
	CALCOCO1	761.123	1996.97	2.53663	1.34291	4.00984e-19	1.69901e-17
	FIGNL1	1720.72	619.791	0.376039	-1.41105	4.13679e-19	1.74716e-17
	WDHD1	2712.14	1121.67	0.42514	-1.23399	4.26383e-19	1.79505e-17
	WDR62	3274.07	1214.61	0.383449	-1.38289	4.75015e-19	1.99339e-17
	PROCR	4159.84	8354.69	1.98086	0.986124	5.05614e-19	2.11504e-17
	CENPU	1380.9	429.167	0.330402	-1.59771	5.23993e-19	2.18497e-17
	BARD1	1008.32	265.872	0.289463	-1.78855	5.31177e-19	2.20791e-17
	HSPA4L	1091.24	2921.99	2.5674	1.36031	6.65529e-19	2.75764e-17
	TM7SF2	424.494	1397.52	3.10651	1.6353	7.63301e-19	3.15282e-17
	SLC44A5	90.5254	569.533	4.95908	2.31007	7.84418e-19	3.22989e-17
	DEPDC1B	2509.31	985.441	0.406822	-1.29753	1.0051e-18	4.12563e-17
	MID1IP1	4533.05	9001.24	1.96211	0.972408	1.2736e-18	5.21146e-17
	SIDT2	1200.62	2862.72	2.32445	1.21689	1.33595e-18	5.44958e-17
	LMNB2	30573.4	15876.2	0.523561	-0.93357	1.34881e-18	5.48504e-17
	CCNE1	2200.29	794.967	0.37737	-1.40595	1.76515e-18	7.15592e-17
	TINAGL1	2598.71	5405.6	2.04595	1.03277	1.81231e-18	7.32454e-17
	CHAF1B	3538.36	1323.55	0.388296	-1.36477	1.91921e-18	7.73277e-17
	CENPN	4655.7	2193.5	0.479622	-1.06003	2.50649e-18	1.00681e-16
	NCAPD2	18405.2	9696.64	0.532384	-0.909461	2.76794e-18	1.10844e-16
	TOPBP1	4949.99	2347.85	0.482583	-1.05115	2.82895e-18	1.12943e-16
	NCAPG2	7151.26	3563.72	0.505538	-0.98411	2.90527e-18	1.15638e-16
	LYNX1	101.207	625.245	4.98527	2.31767	3.79062e-18	1.50422e-16
	RFNG	2044.28	4354.44	2.09182	1.06476	4.03982e-18	1.59829e-16
	AUNIP	1031.58	303.942	0.317564	-1.65488	4.24669e-18	1.67508e-16
	PML	1054.31	2632.26	2.41502	1.27203	4.93417e-18	1.94043e-16
	MCM8	2295.77	940.319	0.422191	-1.24403	5.81541e-18	2.28016e-16
	PDCD4	435.483	1350.86	2.8899	1.53102	7.85273e-18	3.06981e-16
	KANK3	471.463	1708.2	3.3484	1.74347	9.71853e-18	3.78792e-16
	PRKX	967.801	2323.74	2.331	1.22095	1.18995e-17	4.62426e-16
	SLC12A4	2211.13	4709.5	2.0892	1.06295	1.21735e-17	4.7168e-16
	ARHGAP19	2648.95	1114.77	0.432728	-1.20847	1.34036e-17	5.17811e-16
	PBK	4754.04	2225.98	0.476487	-1.06949	1.39841e-17	5.38655e-16
	FLYWCH1	2819.21	5754.13	2.0103	1.00741	1.51372e-17	5.81367e-16
	SLC43A3	4272.2	2011.94	0.479274	-1.06108	1.54105e-17	5.90136e-16
	YPEL2	91.0926	496.416	4.47447	2.16172	1.57261e-17	6.00471e-16
	BLM	1824.05	690.525	0.393555	-1.34536	1.60707e-17	6.11851e-16
	GPX1	6279.35	11923.1	1.87668	0.908186	1.79232e-17	6.80407e-16
	TUBB	80700.8	44678.4	0.559532	-0.837708	1.9171e-17	7.25679e-16
	CDC42BPG	2020.33	4604.02	2.2305	1.15737	2.17122e-17	8.17164e-16
	KLHDC7A	32.2794	307.811	6.14362	2.61909	2.16883e-17	8.17164e-16
	TROAP	4766.6	2223.61	0.473029	-1.08	2.27982e-17	8.55583e-16
	TUBA1B	45602.8	25313.4	0.56024	-0.835883	2.42487e-17	9.07428e-16
	PVRL1	2656.42	5421.35	2.00975	1.00702	2.65708e-17	9.915e-16
	HYLS1	1856.56	711.506	0.399187	-1.32486	3.00215e-17	1.11709e-15
	PIDD1	1914.6	4193.66	2.15424	1.10718	3.04724e-17	1.13066e-15
	C9orf169	53.3129	383.499	5.31196	2.40924	3.10044e-17	1.14716e-15
	AMZ2	4511.83	8704.09	1.90395	0.928996	3.21432e-17	1.18596e-15
	SLC2A1	6239.04	12005.7	1.91384	0.936468	3.28073e-17	1.20707e-15
	LOXL4	37.5557	336.675	6.05	2.59694	3.38702e-17	1.2427e-15
	TOE1	2242.57	810.079	0.375644	-1.41256	4.26421e-17	1.56018e-15
	AHNAK	31373	60392.1	1.89201	0.919923	4.30266e-17	1.56987e-15
	CDCA7	4653.85	2126.38	0.467965	-1.09553	4.87383e-17	1.77334e-15
	ITGA3	18707.3	33938	1.79639	0.8451	5.58812e-17	2.02762e-15
	CEACAM1	17.3182	242.959	7.07205	2.82213	6.71976e-17	2.43152e-15
	KIF22	10731.5	5703.55	0.537606	-0.895378	7.02101e-17	2.53354e-15
	FAM111B	693.68	156.433	0.259901	-1.94397	7.22087e-17	2.59853e-15
	CIT	3761.38	1757.27	0.476682	-1.0689	8.09031e-17	2.90345e-15
	PDGFA	757.379	1881.8	2.4004	1.26328	8.38278e-17	3.00021e-15
	PODXL	4694.49	9123.08	1.92058	0.941543	8.46823e-17	3.02256e-15
	NUP155	5997	2984.85	0.505658	-0.983768	8.77302e-17	3.12286e-15
	POLA1	3184.33	1464.66	0.470183	-1.08871	1.03541e-16	3.67571e-15
	ICMT	8010.09	4173.78	0.527383	-0.923076	1.39717e-16	4.94657e-15
	MSH2	4431.63	2167.69	0.497733	-1.00656	1.52686e-16	5.37726e-15
	NTPCR	648.065	1665.87	2.46974	1.30436	1.527e-16	5.37726e-15
	CCNG2	116.061	546.307	4.02665	2.00958	1.63566e-16	5.74448e-15
	LACC1	111.709	537.243	4.05007	2.01795	1.81716e-16	6.36492e-15
	FAM83H-AS1	779.642	2024.8	2.51016	1.32778	1.82732e-16	6.38349e-15
	RBL1	1542.1	582.494	0.394926	-1.34034	2.00904e-16	6.99966e-15
	MARVELD1	2062	4268.02	2.03565	1.02549	2.05996e-16	7.15809e-15
	FANCI	8097.99	4262.35	0.533185	-0.907292	2.46628e-16	8.54737e-15
	CKS2	5031.06	2269.05	0.463692	-1.10876	2.69595e-16	9.31875e-15
	RASAL1	599.907	1609.31	2.57649	1.36541	3.16826e-16	1.09226e-14
	ALS2CL	960.037	2367.36	2.38422	1.25352	3.43751e-16	1.18198e-14
	DSC3	764.218	1929.44	2.43142	1.2818	3.50532e-16	1.20215e-14
	RIN1	1639.63	3547.97	2.12002	1.08408	3.99253e-16	1.36567e-14
	FADS3	1475.8	3160.84	2.09748	1.06866	4.33113e-16	1.47764e-14
	MAZ	12914.6	6972.74	0.545388	-0.874645	4.65841e-16	1.58519e-14
	LOC284080	27.4584	283.879	6.21288	2.63526	5.79117e-16	1.96556e-14
	YWHAH	10042.3	5420.18	0.54593	-0.873213	6.55307e-16	2.21842e-14
	FANCA	7834.86	3770.57	0.487567	-1.03633	8.36889e-16	2.82585e-14
	TCF19	1698.21	590.392	0.366736	-1.44719	8.40796e-16	2.83176e-14
	RAD18	2231.77	949.942	0.440218	-1.18371	8.66196e-16	2.90984e-14
	OLFM2	176.173	676.991	3.44557	1.78474	9.15055e-16	3.06613e-14
	ZNF469	438.633	1519.71	3.20298	1.67942	1.04334e-15	3.48709e-14
	IGSF9B	609.146	1549.88	2.44361	1.28902	1.14527e-15	3.81807e-14
	PRKAB1	1357.7	3117.5	2.21995	1.15053	1.20312e-15	4.00077e-14
	PLAU	4362.43	8288.74	1.87423	0.906296	1.22655e-15	4.06838e-14
	NR1D2	4445.99	2079.19	0.478079	-1.06468	1.25122e-15	4.13976e-14
	KPNB1	41070.8	23454.9	0.576053	-0.795727	1.31438e-15	4.33778e-14
	PARD6G	779.306	1961.28	2.42331	1.27698	1.37239e-15	4.51788e-14
	MSX1	3849.51	7482.75	1.91073	0.934124	1.53133e-15	5.02851e-14
	POLE3	6772.53	3543.47	0.531125	-0.912876	1.82368e-15	5.95873e-14
	SCNN1A	2136.36	4331.08	2.00027	1.0002	1.82068e-15	5.95873e-14
	NUP50	5220.59	2666.97	0.519213	-0.945601	1.84303e-15	6.00699e-14
	GRAMD4	563.576	1472.48	2.5136	1.32975	1.87372e-15	6.09191e-14
	TMEM249	101.431	519.108	4.21903	2.07691	1.88949e-15	6.12801e-14
	CACYBP	5917.79	3083.79	0.528596	-0.919763	2.03809e-15	6.59368e-14
	STAT6	3236.51	6169.07	1.8789	0.90989	2.43968e-15	7.87352e-14
	TRIM59	1711.88	695.397	0.422533	-1.24286	2.50502e-15	8.06457e-14
	RAP2B	3075.26	5909.42	1.89579	0.922802	2.86681e-15	9.20673e-14
	PPM1G	18996.9	10742.1	0.570822	-0.808888	2.88332e-15	9.23716e-14
	PLK2	2476.03	4903.98	1.95074	0.964022	2.89221e-15	9.24309e-14
	BLOC1S2	2803.05	5610.69	1.96996	0.978163	2.92679e-15	9.33093e-14
	P2RY2	261.279	880.274	3.1106	1.63719	3.09096e-15	9.83044e-14
	DNAJB2	1216.48	2653.12	2.13393	1.09352	3.55751e-15	1.12869e-13
	YBX3	13653	23911.9	1.73565	0.795474	3.70173e-15	1.17162e-13
	MIS18A	2457.09	1114.38	0.464963	-1.10481	3.76359e-15	1.18834e-13
	MYL9	6276.99	3316.74	0.535004	-0.902378	3.93949e-15	1.23792e-13
	PTPRU	3988.68	7657.13	1.89493	0.922141	3.93079e-15	1.23792e-13
	ANK3	385.378	1104.59	2.69383	1.42966	4.16957e-15	1.30398e-13
	SYT8	2.4427	136.917	8.11017	3.01973	4.162e-15	1.30398e-13
	PASK	2670.88	1207.35	0.46397	-1.1079	4.43213e-15	1.3828e-13
	LIF	4619.09	8664.27	1.85054	0.88795	4.47974e-15	1.39434e-13
	FAM84B	1228.34	2672.27	2.12226	1.0856	4.59803e-15	1.42778e-13
	EHF	2924.46	5845.49	1.95316	0.965807	5.12244e-15	1.58687e-13
	TMEM129	1456.09	3069.48	2.06389	1.04537	5.36026e-15	1.65664e-13
	RACGAP1P	870.982	273.815	0.340281	-1.5552	6.24399e-15	1.92523e-13
	RANBP1	9053.65	4963.71	0.554728	-0.850147	6.32581e-15	1.94589e-13
	GMPS	5855.11	3090.83	0.535298	-0.901585	6.60509e-15	2.02705e-13
	PORCN	346.33	1012.36	2.74542	1.45703	7.57119e-15	2.31813e-13
	TRAIP	1606.04	642.521	0.416256	-1.26446	7.92323e-15	2.42027e-13
	GPR126	3965.9	7557.57	1.87153	0.904221	8.30614e-15	2.53135e-13
	NIPAL3	444.584	1218.28	2.59419	1.37528	9.24289e-15	2.81031e-13
	NEIL3	958.736	302.892	0.341499	-1.55005	1.07314e-14	3.25535e-13
	STAT2	1114.01	2427.93	2.1204	1.08433	1.09768e-14	3.32213e-13
	TBC1D2	997.08	2214.93	2.16219	1.11249	1.10528e-14	3.33745e-13
	HAT1	4411.6	2255.48	0.520048	-0.943283	1.31915e-14	3.97408e-13
	DHCR24	11792.3	6135.23	0.52579	-0.92744	1.36801e-14	4.11187e-13
	ANP32B	13194.7	7454.16	0.570762	-0.809039	1.3827e-14	4.14653e-13
	PHLDB1	1955.68	4174.21	2.09358	1.06597	1.45407e-14	4.35062e-13
	CTSD	5920.52	11176.5	1.85907	0.894585	1.53039e-14	4.56858e-13
	SMC1A	11946.8	6717.73	0.568427	-0.814952	1.56583e-14	4.66375e-13
	ITGB4	10671.8	20098.3	1.8574	0.893282	1.6345e-14	4.85727e-13
	VCAN	3492.63	6508.11	1.85064	0.888025	1.65851e-14	4.9175e-13
	ZFYVE1	297.567	909.175	2.84909	1.5105	1.71472e-14	5.07272e-13
	MVP	2624.88	5028.58	1.88717	0.916224	1.8302e-14	5.40218e-13
	CKAP5	15961.1	8958.31	0.568085	-0.81582	1.88812e-14	5.56065e-13
	SUV39H1	2048.6	810.65	0.407361	-1.29562	2.34707e-14	6.89682e-13
	EPHA2	14090.6	25065.7	1.75766	0.813658	2.61554e-14	7.66854e-13
	EZH1	1439.47	2954.77	2.01191	1.00857	2.94189e-14	8.60618e-13
	POLE	13882	7580.74	0.551737	-0.857948	2.98219e-14	8.70469e-13
	ISCU	3175.15	6119	1.89775	0.924289	3.09589e-14	9.01653e-13
	UPP1	1703.93	661.76	0.412643	-1.27703	3.21118e-14	9.33161e-13
	ZNF37A	1511.03	3077.17	1.99525	0.99657	3.27416e-14	9.49362e-13
	NFAT5	5055.1	9154.58	1.78902	0.839168	3.61431e-14	1.04568e-12
	CDIP1	152.916	625.867	3.57175	1.83663	4.09803e-14	1.18302e-12
	SEMA3B	267.747	854.525	2.96098	1.56608	4.12218e-14	1.18739e-12
	TRIOBP	7144.28	12534.6	1.73778	0.797241	4.16797e-14	1.19795e-12
	CDCA7L	5217.85	2735.2	0.532402	-0.909412	4.9087e-14	1.40777e-12
	ACSL3	4636.91	2424.14	0.531452	-0.91199	5.10279e-14	1.46024e-12
	DCAKD	624.269	1502.7	2.31808	1.21293	5.84358e-14	1.6686e-12
	NUF2	2134	930.452	0.450782	-1.1495	5.95462e-14	1.69662e-12
	DRAXIN	11.3747	198.058	6.71415	2.7472	6.28655e-14	1.78731e-12
	ULK1	1003.9	2216.96	2.15664	1.10879	6.35776e-14	1.80365e-12
	TNRC18	5352.08	9850.52	1.81563	0.860469	6.63407e-14	1.87798e-12
	MON2	1397.08	2899.73	2.02837	1.02032	6.84538e-14	1.93364e-12
	JADE1	2114.23	930.733	0.453051	-1.14226	6.93775e-14	1.95552e-12
	ZNF385A	1882.14	3780.51	1.97621	0.982733	7.38869e-14	2.07817e-12
	XRCC3	2580.99	1115.97	0.445234	-1.16737	7.85799e-14	2.20544e-12
	ANP32E	6966.77	3801.58	0.551913	-0.857487	8.02731e-14	2.24816e-12
	MEGF8	2110.52	4085.24	1.90656	0.930971	8.32062e-14	2.32535e-12
	NUP85	9079.93	5061.35	0.563085	-0.828574	9.66635e-14	2.6957e-12
	NUP107	4508.47	2358.45	0.531331	-0.912318	1.07982e-13	3.00497e-12
	RPA2	5493.9	2969.18	0.547727	-0.86847	1.09112e-13	3.03e-12
	GOLGB1	2078.4	4033.63	1.90207	0.927567	1.13253e-13	3.13834e-12
	FHL2	5176.28	10023.4	1.92441	0.944413	1.17655e-13	3.25347e-12
	ERI1	4417.07	2324.12	0.534128	-0.904742	1.20057e-13	3.31293e-12
	GADD45B	2397.41	1006.24	0.433849	-1.20473	1.20367e-13	3.3145e-12
	PHPT1	3526.41	6418.17	1.7958	0.84463	1.29744e-13	3.56525e-12
	NTN1	523.666	1543.54	2.80203	1.48647	1.36961e-13	3.75572e-12
	CDC7	1930.69	870.235	0.46434	-1.10675	1.40397e-13	3.84191e-12
	FAM64A	2240.26	947.601	0.437518	-1.19259	1.4128e-13	3.85802e-12
	ZSWIM4	129.899	527.393	3.53129	1.8202	1.65115e-13	4.49955e-12
	KIAA1324	48.5609	311.163	4.62163	2.2084	1.83887e-13	5.00073e-12
	CDK2	5819.21	2961.99	0.518187	-0.948456	1.90205e-13	5.16187e-12
	PLCXD2	340.684	960.621	2.63962	1.40033	2.07176e-13	5.61085e-12
	PTCHD4	17.6232	209.254	5.96681	2.57696	2.14084e-13	5.78598e-12
	COL17A1	50.9869	332.679	4.64451	2.21553	2.16291e-13	5.83365e-12
	PPIF	9906.33	5450.61	0.554206	-0.851505	2.17104e-13	5.84357e-12
	GEN1	1611.68	694.385	0.446727	-1.16253	2.19262e-13	5.88957e-12
	PARP2	3704.55	1921.14	0.527433	-0.922941	2.23515e-13	5.99158e-12
	MRTO4	11282.9	6509.94	0.582691	-0.779198	2.45946e-13	6.57943e-12
	ORAI3	61.3893	344.12	4.27873	2.09718	2.46489e-13	6.58055e-12
	BCLAF1	11437.6	6597.09	0.582956	-0.778542	2.67908e-13	7.13788e-12
	ASCC3	4257.65	8019.67	1.85153	0.88872	2.76885e-13	7.36211e-12
	PLEKHF1	236.191	745.462	2.88787	1.53001	2.77903e-13	7.37426e-12
	KNTC1	3604.66	1828.47	0.517387	-0.950684	2.83507e-13	7.5078e-12
	PRODH	109.309	472.597	3.65381	1.8694	2.86403e-13	7.56921e-12
	UNC5B	2239.13	4491.22	1.97054	0.97859	2.88389e-13	7.60639e-12
	FANCG	4244.87	2115.65	0.508348	-0.976111	2.90706e-13	7.65215e-12
	TRIM32	936.061	2020.66	2.10034	1.07062	3.10964e-13	8.16903e-12
	HNRNPD	21394.5	12668.2	0.597636	-0.742661	3.14406e-13	8.24297e-12
	CENPE	1476.35	540.263	0.380466	-1.39416	3.18416e-13	8.33146e-12
	SCARA3	3511.89	1709.61	0.495678	-1.01253	3.24121e-13	8.46388e-12
	POLL	1585.98	3150.87	1.94828	0.962198	3.59844e-13	9.3595e-12
	SGSH	1347.8	2752.24	1.99224	0.994392	3.59353e-13	9.3595e-12
	RBM12	7358.36	3996.92	0.548506	-0.866422	3.70455e-13	9.61645e-12
	ZNF600	211.085	728.923	3.08767	1.62652	4.06796e-13	1.0539e-11
	CDC45	2865.93	1434.32	0.510335	-0.970484	4.20605e-13	1.08753e-11
	OSBPL5	1319.91	2812.05	2.09752	1.06869	4.27551e-13	1.10332e-11
	KSR1	429.368	1114.2	2.46858	1.30368	4.41308e-13	1.13658e-11
	TRIP13	5245.53	2791.47	0.541103	-0.886025	4.76158e-13	1.22394e-11
	RNF19B	1168.98	2406.54	2.00997	1.00718	5.30168e-13	1.36011e-11
	C11orf82	1712.56	760.318	0.459695	-1.12125	5.33632e-13	1.36633e-11
	PBXIP1	424.547	1099.8	2.46495	1.30156	5.53357e-13	1.41408e-11
	HHAT	81.3861	393.715	3.91932	1.9706	5.76363e-13	1.47001e-11
	INPP1	856.762	1873.49	2.12532	1.08768	5.86274e-13	1.49239e-11
	S100A6	19359.9	33959.2	1.73718	0.796747	6.52356e-13	1.65739e-11
	KDM6B	1849.59	3615.38	1.91983	0.940978	7.0435e-13	1.78603e-11
	DCTPP1	9758.9	5479.16	0.567931	-0.816213	7.38395e-13	1.86875e-11
	SKA1	877.733	305.54	0.37323	-1.42186	7.73195e-13	1.95306e-11
	POLA2	2494.36	1229.26	0.503877	-0.988857	8.3042e-13	2.09358e-11
	MCM5	17107.7	8844.24	0.524187	-0.931847	9.98503e-13	2.51252e-11
	WDR59	2728.02	4973.88	1.79997	0.847975	1.04467e-12	2.62365e-11
	SSX2IP	3387	1752.71	0.526632	-0.925133	1.05216e-12	2.63743e-11
	TFDP1	11443.8	6705.15	0.591836	-0.75673	1.05904e-12	2.64961e-11
	SMC2	2237.87	1081.46	0.495167	-1.01401	1.06338e-12	2.65541e-11
	FAM214A	94.0643	428.012	3.71309	1.89262	1.12067e-12	2.79316e-11
	RMI1	1581.05	701.411	0.458939	-1.12362	1.30679e-12	3.25088e-11
	MDC1	7431.82	4021.76	0.547253	-0.869719	1.36277e-12	3.38373e-11
	KIAA1462	582.059	1423.14	2.35309	1.23455	1.41465e-12	3.50594e-11
	UBTF	14615.4	8656.63	0.59787	-0.742096	1.4306e-12	3.53878e-11
	COL5A1	6.42491	137.565	6.37989	2.67353	1.48302e-12	3.66155e-11
	KIF24	766.58	251.569	0.358082	-1.48164	1.70843e-12	4.21017e-11
	NDC1	6317.69	3524.04	0.566114	-0.820836	1.76149e-12	4.3328e-11
	PLXNB2	20196.6	33707.8	1.65261	0.724746	1.85768e-12	4.56086e-11
	CHST6	666.765	1541.55	2.24369	1.16587	1.98176e-12	4.85643e-11
	NCAPH2	7747.07	4429.12	0.578488	-0.789641	2.04875e-12	5.01124e-11
	IRF6	939.237	1998.19	2.0652	1.04628	2.15312e-12	5.25674e-11
	BRCA2	1174.8	474.975	0.423187	-1.24063	2.31009e-12	5.62951e-11
	EXOSC9	6248.99	3535.97	0.572395	-0.804916	2.35018e-12	5.7166e-11
	ABCG4	132.962	501.524	3.28366	1.7153	2.37741e-12	5.77214e-11
	OAS3	3411.64	1805.35	0.538111	-0.894023	2.63216e-12	6.37885e-11
	DCLRE1A	2050.62	987.53	0.493966	-1.01752	2.93513e-12	7.09998e-11
	ATF3	1403.95	3064.58	2.14337	1.09988	2.9566e-12	7.13878e-11
	NABP1	759.404	1681.5	2.13866	1.09671	2.96783e-12	7.15275e-11
	ZNF165	911.495	330.843	0.387804	-1.3666	3.20793e-12	7.71724e-11
	RAD54L	2198.46	1009.05	0.471299	-1.08529	3.36868e-12	8.08915e-11
	SYNCRIP	22156.3	13316.3	0.606914	-0.720436	3.44474e-12	8.25669e-11
	PTBP1	34062.5	20815.7	0.615104	-0.701098	3.52505e-12	8.4338e-11
	GJC1	3316.73	1706.39	0.524165	-0.931908	3.54297e-12	8.46126e-11
	GEMIN4	8079.05	4696.32	0.587349	-0.767711	3.62887e-12	8.65068e-11
	DBF4	1604.26	715.016	0.461146	-1.1167	3.73198e-12	8.88003e-11
	VRK1	4011.92	2035.79	0.520112	-0.943105	3.73861e-12	8.88003e-11
	ANKRD33B	1741.35	3288.3	1.8559	0.892118	3.94474e-12	9.35274e-11
	FRMPD2	2.06855	114.785	6.56801	2.71546	4.01207e-12	9.49522e-11
	ZNF551	998.172	384.109	0.407133	-1.29643	4.06372e-12	9.60017e-11
	MTFR2	847.017	294.854	0.377142	-1.40682	4.11074e-12	9.69383e-11
	RPL23AP82	260.18	821.712	2.86754	1.51981	4.77081e-12	1.12302e-10
	LRR1	1587.94	717.505	0.467755	-1.09617	4.79e-12	1.12552e-10
	SRSF7	13680.7	8052.14	0.59508	-0.748845	4.83396e-12	1.13382e-10
	ODC1	42849.3	25739.9	0.60807	-0.71769	4.84607e-12	1.13464e-10
	ANKRD19P	1509.85	3028.48	1.95834	0.96963	4.89339e-12	1.14368e-10
	RGS3	2110.78	1027.21	0.498476	-1.0044	4.91745e-12	1.14726e-10
	PPM1A	1312.12	2616.05	1.94819	0.962134	5.49233e-12	1.27911e-10
	H6PD	853.714	1870.13	2.14414	1.1004	5.54537e-12	1.28918e-10
	DFNB31	535.546	1316.93	2.3583	1.23775	6.08289e-12	1.41164e-10
	PRDM1	20.0445	193.108	5.22906	2.38655	6.14928e-12	1.42453e-10
	HIRIP3	2699.14	1340.63	0.506246	-0.982089	6.20244e-12	1.43431e-10
	KIAA0430	1524.13	2921.44	1.88412	0.913887	6.26971e-12	1.44499e-10
	NOTCH3	837.733	1950.1	2.27171	1.18378	6.2706e-12	1.44499e-10
	ATAD5	785.538	252.129	0.352566	-1.50403	6.49639e-12	1.4944e-10
	PSIP1	4259.77	2323.9	0.555396	-0.84841	6.75066e-12	1.55017e-10
	SPC25	1828.93	871.399	0.489958	-1.02927	8.33827e-12	1.9114e-10
	DTYMK	5447	2959.88	0.549542	-0.863699	8.43981e-12	1.9313e-10
	IRGQ	501.471	1203.47	2.29537	1.19873	8.52714e-12	1.94789e-10
	SRSF10	5884.19	3366.65	0.579251	-0.78774	8.63121e-12	1.96824e-10
	CASZ1	469.247	1139.58	2.31366	1.21018	9.81747e-12	2.23488e-10
	RGS2	2274.75	1004.23	0.463405	-1.10965	9.97568e-12	2.26696e-10
	DDX39A	12520.8	7487	0.60258	-0.730775	1.02051e-11	2.31509e-10
	RAD51AP1	1412.19	534.111	0.400687	-1.31945	1.02415e-11	2.31936e-10
	SMCHD1	4801.54	2664.21	0.562656	-0.829675	1.02756e-11	2.32306e-10
	SEC31B	883.015	1838.87	2.02732	1.01958	1.04734e-11	2.36372e-10
	BCL2L12	1874.79	860.981	0.472908	-1.08037	1.10381e-11	2.4869e-10
	SLC27A1	466.506	1165.23	2.37878	1.25022	1.15554e-11	2.59898e-10
	DSN1	1904.26	922.181	0.497307	-1.00779	1.19259e-11	2.67772e-10
	PBX3	601.684	182.334	0.33896	-1.56081	1.21828e-11	2.73074e-10
	HAUS8	1628.27	734.638	0.468921	-1.09258	1.34379e-11	3.00694e-10
	HNRNPH3	8861.57	4900.6	0.560433	-0.835387	1.4099e-11	3.14949e-10
	KIF20B	2259.66	1009.11	0.461011	-1.11713	1.50905e-11	3.36526e-10
	ATAD3B	4745.15	2680.28	0.571825	-0.806353	1.52287e-11	3.39031e-10
	ZWILCH	2841.44	1492.34	0.535827	-0.900161	1.55814e-11	3.46298e-10
	CRIP2	401.569	1034.42	2.44939	1.29242	1.59965e-11	3.54923e-10
	PAQR4	2473.34	1126.08	0.474743	-1.07478	1.69385e-11	3.74778e-10
	RBBP6	4720.17	2646.72	0.568789	-0.814035	1.69485e-11	3.74778e-10
	NOTCH1	3853.17	6777.9	1.73293	0.793213	1.74229e-11	3.84622e-10
	IRF2BPL	2968.38	5397.55	1.80092	0.848735	1.91e-11	4.20938e-10
	ANXA3	10276.3	5590.53	0.556733	-0.844942	2.1217e-11	4.6681e-10
	CTNNAL1	7850.44	4492.03	0.581512	-0.78212	2.28579e-11	5.02071e-10
	SEMA3G	262.935	741.338	2.6167	1.38775	2.31612e-11	5.07883e-10
	UBA2	5705.74	3128.69	0.558353	-0.840751	2.32782e-11	5.09598e-10
	TIMELESS	5915.14	3414.58	0.584685	-0.774269	2.44869e-11	5.35167e-10
	PRKAB2	1058.18	2171.45	1.99576	0.996937	2.64586e-11	5.77299e-10
	TGFA	2735.1	5027.7	1.81389	0.859083	2.66876e-11	5.81329e-10
	MED23	1204.84	2346.84	1.90564	0.930279	2.96512e-11	6.44816e-10
	TSR1	15041.3	9245.34	0.620117	-0.689388	3.12107e-11	6.77608e-10
	UBE2S	3333.4	1754.97	0.535112	-0.902087	3.16695e-11	6.86433e-10
	TRIAP1	2919.13	5080.43	1.71937	0.78188	3.26864e-11	7.07309e-10
	TTI1	3220.85	1744.35	0.550869	-0.860218	3.27953e-11	7.08498e-10
	DNTTIP2	6896.94	3982.96	0.586638	-0.769457	3.41374e-11	7.3628e-10
	USP39	7611.74	4518.87	0.599723	-0.737632	3.4416e-11	7.41073e-10
	TOM1L2	911.128	1856.87	1.98403	0.988432	3.60966e-11	7.75988e-10
	TLR3	38.945	251.89	4.36659	2.12651	3.62568e-11	7.78158e-10
	ZFP90	635.718	1432	2.15555	1.10806	3.98987e-11	8.54925e-10
	C16orf59	1451.2	637.999	0.457505	-1.12814	4.09748e-11	8.76554e-10
	G2E3	2108.91	1043.03	0.508573	-0.975473	4.23244e-11	9.03954e-10
	TP73	1376.21	537.051	0.414706	-1.26984	4.24289e-11	9.04713e-10
	CRY1	500.068	1255.69	2.36586	1.24236	4.33144e-11	9.22098e-10
	HSPE1	6592.12	3854.61	0.591047	-0.758656	4.44199e-11	9.42577e-10
	LAMB2	2659.54	4696.17	1.74662	0.804563	4.44065e-11	9.42577e-10
	PPFIBP1	4661.59	8023.35	1.69666	0.762697	4.61274e-11	9.77231e-10
	HAUS2	2099.83	1061.41	0.517766	-0.949629	4.6396e-11	9.81338e-10
	NCL	88985.8	56039.5	0.634735	-0.655773	5.0915e-11	1.07519e-09
	SYTL2	356.868	911.901	2.44162	1.28784	5.33037e-11	1.12383e-09
	RAB17	1290.9	2467.31	1.87203	0.904601	5.41155e-11	1.13911e-09
	C1orf116	166.966	555.877	2.94635	1.55893	5.43865e-11	1.14299e-09
	LRRC59	31252.7	19675.8	0.633946	-0.657569	5.49799e-11	1.15361e-09
	PHYKPL	472.7	1126.03	2.26452	1.1792	5.90624e-11	1.2373e-09
	EIF4A3	18956.1	11700.4	0.623605	-0.681296	6.03952e-11	1.2632e-09
	GAS6-AS1	164.347	546.11	2.93871	1.55518	6.68359e-11	1.39347e-09
	TM7SF3	3130.13	5524.87	1.73881	0.798103	6.68275e-11	1.39347e-09
	CUTC	3530.89	1952.69	0.561633	-0.832299	7.36577e-11	1.53084e-09
	PPRC1	13998.9	8357.11	0.601521	-0.733314	7.35468e-11	1.53084e-09
	CENPL	725.549	252.683	0.380376	-1.3945	7.39533e-11	1.53456e-09
	NET1	2913.25	1578.11	0.551264	-0.859185	7.53979e-11	1.56207e-09
	ESRRB	47.348	277.036	4.15279	2.05408	7.96287e-11	1.64712e-09
	BRIX1	9075.44	5506.37	0.612729	-0.706679	8.53931e-11	1.76358e-09
	SFPQ	17835.4	11147.6	0.630356	-0.665761	8.79557e-11	1.81366e-09
	LHX5	138.514	487.351	3.04711	1.60744	9.00012e-11	1.85292e-09
	CASP8AP2	1459.42	684.964	0.484921	-1.04418	9.27052e-11	1.90561e-09
	IL17RE	317.99	824.259	2.43422	1.28346	9.3581e-11	1.9206e-09
	REEP2	134.716	473.197	3.08954	1.62739	1.01718e-10	2.08434e-09
	C8orf33	9908.72	6067.43	0.618035	-0.694241	1.04915e-10	2.1465e-09
	MMP14	387.413	951.58	2.32292	1.21594	1.09649e-10	2.23987e-09
	PGF	330.728	861.046	2.44515	1.28992	1.1195e-10	2.28332e-09
	ARMCX3	565.771	1253.8	2.13222	1.09235	1.13323e-10	2.3054e-09
	ICOSLG	792.565	1712.18	2.07803	1.05521	1.13383e-10	2.3054e-09
	GID4	342.696	867.18	2.38929	1.25658	1.14079e-10	2.31596e-09
	DGCR8	5064.62	2897.1	0.578035	-0.790772	1.19017e-10	2.41248e-09
	KRT15	976.857	2278.2	2.22501	1.15381	1.21763e-10	2.46434e-09
	BAZ1B	10356.5	6346.45	0.618347	-0.693511	1.23622e-10	2.49811e-09
	STIP1	34785	22180.9	0.642249	-0.638795	1.25828e-10	2.53878e-09
	TRAK1	2131.06	3782.77	1.74829	0.805947	1.29915e-10	2.61723e-09
	COPS3	6757.79	3879.44	0.58279	-0.778952	1.3545e-10	2.72457e-09
	RBM17	6193.33	3669.53	0.599284	-0.738687	1.36571e-10	2.7429e-09
	JAG1	937.586	1901.3	1.97214	0.979763	1.37481e-10	2.75697e-09
	SNRPA1	2439.28	1218.23	0.512509	-0.96435	1.3849e-10	2.77297e-09
	TUBGCP3	4645.2	2670.24	0.58177	-0.781478	1.3904e-10	2.77975e-09
	DCK	1848.48	927.583	0.514739	-0.958087	1.39808e-10	2.79085e-09
	KLHL30	12.5186	155.698	5.21781	2.38345	1.43257e-10	2.85536e-09
	DSE	1519	2791.46	1.8062	0.852961	1.44258e-10	2.87095e-09
	NUP54	3146.17	1741.51	0.562618	-0.829773	1.45797e-10	2.8972e-09
	CCDC90B	860.291	1917.48	2.13815	1.09636	1.51656e-10	3.00908e-09
	IPO5	23158.1	14558.6	0.634236	-0.656908	1.60364e-10	3.17704e-09
	SET	21662.2	13484.4	0.62815	-0.67082	1.62372e-10	3.21197e-09
	ING1	1891.44	896.693	0.487754	-1.03577	1.62941e-10	3.2184e-09
	WRAP53	2532.92	1355.73	0.545332	-0.874794	1.67384e-10	3.30119e-09
	ATP6V0A1	2140.09	3838.54	1.77287	0.826083	1.72611e-10	3.39917e-09
	HMCN2	7.76661	128.974	5.39577	2.43183	1.80708e-10	3.5533e-09
	PEAR1	754.011	1555.78	2.00333	1.0024	1.86712e-10	3.66586e-09
	CLIP2	1482.7	2848.27	1.90066	0.926498	1.87798e-10	3.68169e-09
	H2AFX	12419.5	6741.14	0.548332	-0.866878	1.88146e-10	3.683e-09
	NCKAP5L	659.964	1468.7	2.13802	1.09628	1.88489e-10	3.68423e-09
	ALYREF	18476	11558.9	0.628952	-0.668978	1.95853e-10	3.82247e-09
	NUP62	8266.21	4832.41	0.588462	-0.764979	2.01091e-10	3.91376e-09
	PGP	3512.96	1810.92	0.5252	-0.929061	2.01126e-10	3.91376e-09
	NTMT1	6257.51	3730.28	0.602724	-0.730431	2.03177e-10	3.94783e-09
	CUL7	2771.75	4754.16	1.69128	0.758119	2.10131e-10	4.07692e-09
	TAB3	815.57	1707.28	2.02553	1.0183	2.1197e-10	4.10654e-09
	SDC4	5471.86	9158.46	1.66005	0.731228	2.13969e-10	4.13914e-09
	HNRNPF	30754.4	19498.7	0.63809	-0.648168	2.19592e-10	4.24168e-09
	CCT5	40559.9	25936.2	0.644671	-0.633366	2.28947e-10	4.41413e-09
	DYNLL2	8045.43	4897.45	0.614397	-0.702756	2.29192e-10	4.41413e-09
	GPRIN1	2213.27	1112.19	0.518205	-0.948406	2.33212e-10	4.48498e-09
	RNF26	3860.04	2148.6	0.563851	-0.826614	2.51707e-10	4.83358e-09
	MARCH8	733.288	1534.3	2.02511	1.018	2.52773e-10	4.84697e-09
	CWF19L1	2397.15	1240.9	0.530479	-0.914632	2.55781e-10	4.8975e-09
	CERS5	1525.36	2842.03	1.82679	0.869312	2.59116e-10	4.95413e-09
	BUD13	2191.86	1148.23	0.535318	-0.901531	2.61768e-10	4.99757e-09
	RAB5B	1452	2669.03	1.80888	0.855094	2.74638e-10	5.23567e-09
	FAM57A	3058.87	1656.31	0.549288	-0.864366	2.90748e-10	5.53475e-09
	USP13	2443.02	1279.96	0.534973	-0.902462	3.26014e-10	6.1971e-09
	KCNJ12	447.553	1116.67	2.36816	1.24377	3.30443e-10	6.2722e-09
	H3F3B	31584	20318.1	0.648088	-0.625739	3.44448e-10	6.52861e-09
	BSDC1	2310.7	4004.37	1.70926	0.773371	3.52917e-10	6.67949e-09
	PRPF4	8036.88	4779.3	0.602376	-0.731264	3.5522e-10	6.7134e-09
	PRPS2	3745.07	2083.6	0.566142	-0.820765	3.66507e-10	6.91677e-09
	CALM1	9794.42	6059.27	0.625155	-0.677713	3.68749e-10	6.93914e-09
	CBX3	11631	6989.25	0.607727	-0.718506	3.68235e-10	6.93914e-09
	STRA13	10034.7	6014.07	0.604289	-0.72669	3.80259e-10	7.14549e-09
	NUDC	14728.4	9304.91	0.636802	-0.651084	3.81553e-10	7.15956e-09
	ARHGEF39	1540.77	745.235	0.497903	-1.00606	3.82318e-10	7.16369e-09
	DDX46	12829.9	8071.49	0.634357	-0.656634	3.91233e-10	7.3203e-09
	SOX4	1708.51	3112.08	1.78709	0.837616	4.0336e-10	7.53647e-09
	SAAL1	2870.63	1591.13	0.563899	-0.826491	4.11196e-10	7.67195e-09
	ARRDC1	1365.14	2523.44	1.81281	0.858224	4.19398e-10	7.81389e-09
	PLEKHA8	722.278	1489.65	2.00192	1.00139	4.21159e-10	7.83559e-09
	SUZ12	3955.35	2291.31	0.587135	-0.768237	4.29881e-10	7.98654e-09
	TP53I11	1775.45	3538.44	1.95812	0.969468	4.422e-10	8.20381e-09
	KIAA0101	3070.39	1679.8	0.558358	-0.840739	4.49899e-10	8.33487e-09
	RRM1	11199.6	6982.07	0.629635	-0.667412	4.65831e-10	8.61788e-09
	GOLM1	10474.9	6545.39	0.630089	-0.666372	4.77339e-10	8.81835e-09
	EPB41L2	6146.91	3720.13	0.611522	-0.709523	5.02567e-10	9.27138e-09
	CLUHP3	308.727	793.119	2.4056	1.2664	5.05201e-10	9.29386e-09
	CTCF	5191.01	3099.04	0.603813	-0.727827	5.04825e-10	9.29386e-09
	BMP1	2878.34	4922.26	1.69086	0.757759	5.17802e-10	9.51236e-09
	SLC46A1	1879.88	3310.4	1.73383	0.793966	5.19794e-10	9.53561e-09
	MOB3A	721.877	1477.88	1.98809	0.991381	5.35941e-10	9.8181e-09
	TEX30	1290.63	595.199	0.478847	-1.06236	5.50007e-10	1.00618e-08
	HELLS	1745.11	883.915	0.519873	-0.94377	5.71035e-10	1.04319e-08
	BLVRB	2812.19	4889.3	1.71783	0.780585	5.72766e-10	1.0449e-08
	DIAPH3	2028.88	1044.09	0.52762	-0.922428	5.77008e-10	1.05118e-08
	SGOL1	810.846	312.919	0.41161	-1.28065	5.82141e-10	1.05906e-08
	RGS6	48.1392	256.055	3.86484	1.95041	5.86829e-10	1.06611e-08
	RAD54B	990.096	428.256	0.453866	-1.13966	6.01101e-10	1.09053e-08
	POLQ	1869.3	960.452	0.527239	-0.92347	6.05282e-10	1.0966e-08
	TRIM8	2217.4	3821.14	1.7	0.765533	6.1303e-10	1.10911e-08
	HBE1	1816.81	3279.89	1.78421	0.835288	6.18311e-10	1.11713e-08
	EMC3-AS1	646.737	233.757	0.393054	-1.3472	6.48166e-10	1.16946e-08
	DCP1B	496.894	1132.72	2.18327	1.12649	6.82366e-10	1.22948e-08
	TJP3	420.028	1064.18	2.44082	1.28736	7.01314e-10	1.26189e-08
	DUT	4588.2	2717.16	0.599576	-0.737987	7.1028e-10	1.27627e-08
	GINS1	1367.89	646.822	0.487978	-1.03511	7.25046e-10	1.30102e-08
	ATXN3	442.425	1021.85	2.19668	1.13532	7.26925e-10	1.30261e-08
	TMEM131	4332.15	7044.33	1.61004	0.687101	7.64686e-10	1.36841e-08
	PIM1	1400.7	655.632	0.481904	-1.05318	7.94169e-10	1.41805e-08
	SEMA4G	822.955	1811.72	2.16452	1.11405	7.95661e-10	1.41805e-08
	STAT4	31.8147	213.581	4.23701	2.08304	7.95504e-10	1.41805e-08
	TCP1	33820.1	21747	0.64798	-0.625979	8.01248e-10	1.42607e-08
	TMEM209	2475.53	1329.55	0.546507	-0.871688	8.02586e-10	1.42652e-08
	RHBDF2	1890.69	3474.06	1.8177	0.862114	8.11519e-10	1.44045e-08
	TRIM5	673.931	1400.9	2.0162	1.01164	8.15113e-10	1.44487e-08
	ZNF276	2834.54	4756.44	1.65812	0.729549	8.18006e-10	1.44805e-08
	ELF3	3184.77	5293.22	1.64799	0.720711	8.58949e-10	1.51848e-08
	LBR	5643.37	3388.44	0.607517	-0.719003	8.77709e-10	1.54956e-08
	LOC100506860	573.768	1250.41	2.10386	1.07304	9.06896e-10	1.59831e-08
	MRPS34	8967.79	5459.22	0.614924	-0.70152	9.07758e-10	1.59831e-08
	METRNL	1960.34	3555.67	1.78495	0.83588	9.14807e-10	1.60857e-08
	DCLRE1B	1276.01	583.205	0.476558	-1.06928	9.34337e-10	1.64071e-08
	CDK5RAP2	4079.33	2389.61	0.59326	-0.753263	9.56952e-10	1.67818e-08
	RHNO1	1233.44	580.01	0.487757	-1.03577	1.05824e-09	1.85333e-08
	ZNF740	2024.77	3498.25	1.70366	0.768638	1.07596e-09	1.88185e-08
	PRPS1	5376.29	3239.75	0.608931	-0.71565	1.08762e-09	1.89973e-08
	MAMDC4	427.912	1075.1	2.3433	1.22854	1.12413e-09	1.96088e-08
	MACC1	312.921	836.556	2.46722	1.30289	1.14756e-09	1.9991e-08
	IQCC	873.201	365.964	0.443322	-1.17357	1.33684e-09	2.32575e-08
	ABCC10	1332.48	2430.18	1.79039	0.840272	1.36177e-09	2.36599e-08
	CBX2	2984.72	1608.34	0.551085	-0.859652	1.37429e-09	2.38459e-08
	ABAT	177.712	552.23	2.78766	1.47905	1.38492e-09	2.39986e-08
	PHYHIP	58.3485	275.704	3.59699	1.84679	1.50682e-09	2.60766e-08
	DDX11	2601.25	1442.48	0.564125	-0.825914	1.52676e-09	2.63869e-08
	TOMM40	10905.5	6849.32	0.631814	-0.662429	1.56461e-09	2.70054e-08
	NSMCE4A	3302.24	1907.85	0.586104	-0.770773	1.58888e-09	2.73883e-08
	ZNF561	1049.55	1986.51	1.84993	0.887473	1.59436e-09	2.74468e-08
	TNIP1	2262.15	3894.73	1.70188	0.767128	1.63299e-09	2.8075e-08
	PHF5A	3907.34	2295.52	0.596032	-0.746538	1.65338e-09	2.83884e-08
	AGRN	6764.46	10647.2	1.56085	0.642336	1.69517e-09	2.90679e-08
	ZBTB4	1113.18	2090.38	1.84028	0.879928	1.76372e-09	3.02039e-08
	RGAG4	186.851	545.185	2.63783	1.39935	1.78617e-09	3.05486e-08
	F5	6.60126	111.828	4.98975	2.31897	1.8372e-09	3.13805e-08
	FANCD2	4194.21	2434.55	0.588711	-0.764369	1.87232e-09	3.19388e-08
	KLF10	4169.73	2431.02	0.593903	-0.751701	1.92163e-09	3.27375e-08
	BRIP1	1365.99	668.113	0.504865	-0.98603	1.96008e-09	3.33494e-08
	DIAPH1	19809.3	12875.6	0.654892	-0.610671	1.99634e-09	3.39222e-08
	TRIML2	146.105	465.314	2.7994	1.48512	2.0162e-09	3.42154e-08
	PTGES3	19655.7	12495.6	0.642427	-0.638396	2.03471e-09	3.44851e-08
	OR51I1	270.527	54.153	0.274801	-1.86354	2.04763e-09	3.46593e-08
	GIPR	114.457	400.829	2.97722	1.57397	2.12918e-09	3.59933e-08
	TMC4	775.95	1618.06	2.01341	1.00964	2.45359e-09	4.13708e-08
	ZBTB7B	2721.33	4718.1	1.70466	0.769487	2.45193e-09	4.13708e-08
	APBB3	530.033	1134.76	2.05622	1.04	2.56109e-09	4.31281e-08
	RSRP1	1291.23	2397.84	1.81947	0.863518	2.59604e-09	4.36607e-08
	USH1C	295.927	759.767	2.42053	1.27532	2.67637e-09	4.4954e-08
	HAUS1	1852.81	982.372	0.542613	-0.882004	2.85183e-09	4.78401e-08
	FAM83H	10577.9	16292.6	1.52807	0.611714	2.86121e-09	4.79363e-08
	BBS1	707.509	1476.94	2.01624	1.01167	3.09619e-09	5.1807e-08
	ZNF767P	499.134	1114.46	2.14236	1.0992	3.11969e-09	5.21337e-08
	NOLC1	44000.5	28704.3	0.65747	-0.605002	3.15448e-09	5.26481e-08
	DAZAP1	12083	7775.32	0.648802	-0.62415	3.23993e-09	5.40056e-08
	SRSF3	18287.2	11918.4	0.65671	-0.606673	3.26506e-09	5.43556e-08
	SRSF6	13073.8	8404.11	0.648825	-0.624099	3.38341e-09	5.62546e-08
	PIM2	1094.93	2039.8	1.82362	0.866802	3.41431e-09	5.66966e-08
	KRT19	46090.9	72991.3	1.57419	0.654611	3.63145e-09	6.02261e-08
	LTBP2	206.393	571.28	2.52435	1.33591	3.64531e-09	6.03798e-08
	MIS18BP1	1781.78	799.63	0.471774	-1.08383	3.89022e-09	6.43552e-08
	CBX1	9324.29	5951.54	0.643674	-0.635598	3.95562e-09	6.53548e-08
	TMEM229B	21.0549	163.473	4.29341	2.10213	4.0426e-09	6.6708e-08
	TMEM97	3091.18	1795.63	0.589132	-0.763337	4.12717e-09	6.8018e-08
	MIR4697HG	683.53	1367.85	1.94124	0.956977	4.22643e-09	6.95665e-08
	DNAJC1	1536.56	781.163	0.523106	-0.934826	4.33498e-09	7.1264e-08
	BEND3	1063.37	472.716	0.466892	-1.09884	4.34676e-09	7.13684e-08
	ATP1B3	7397.95	4584.81	0.627779	-0.671671	4.58081e-09	7.51172e-08
	SNCG	555.745	1163.58	2.02556	1.01832	4.73093e-09	7.74823e-08
	CSF1	252.004	651.115	2.39077	1.25747	5.11668e-09	8.36956e-08
	SLC35D1	667.292	1337.66	1.94423	0.959199	5.18179e-09	8.46552e-08
	ERLIN1	7829.17	4944.02	0.637103	-0.650402	5.23809e-09	8.54687e-08
	DKC1	12241.2	7593.2	0.627947	-0.671285	5.28473e-09	8.61227e-08
	SUPT16H	17889.9	11521.3	0.649088	-0.623513	5.39576e-09	8.78232e-08
	EMG1	9370.72	5785.99	0.627447	-0.672434	5.43202e-09	8.83039e-08
	TMEM8B	182.933	522.286	2.5774	1.36592	5.55696e-09	9.02234e-08
	SSRP1	33682	22256.8	0.665223	-0.588089	5.69605e-09	9.23674e-08
	ACHE	112.741	402.757	3.01457	1.59195	5.79121e-09	9.37948e-08
	GAS2L3	498.416	166.528	0.375628	-1.41262	5.88819e-09	9.5248e-08
	PPP1CC	16153.4	10473.3	0.653451	-0.613849	5.94126e-09	9.59883e-08
	SAMD1	2310.76	1189.59	0.529561	-0.917131	5.96122e-09	9.61923e-08
	ZER1	838.3	1603.33	1.86505	0.899217	6.03248e-09	9.72228e-08
	SHPK	2705.33	1527	0.57363	-0.801808	6.19271e-09	9.96828e-08
	SF3B2	23589.4	15521.3	0.662409	-0.594206	6.23249e-09	1.002e-07
	JUP	10101.4	15659.7	1.54057	0.623463	6.24392e-09	1.00261e-07
	HSPH1	14764.5	9645.37	0.65794	-0.603972	6.4752e-09	1.03848e-07
	EIF3B	43149.7	28836.9	0.672517	-0.572357	6.50752e-09	1.04239e-07
	ENOPH1	4613.31	2811.52	0.616417	-0.698021	6.83845e-09	1.09407e-07
	MIS12	1678.92	878.813	0.536389	-0.89865	6.86372e-09	1.09678e-07
	SPATA20	2095.15	3605.17	1.6901	0.757105	7.04366e-09	1.1228e-07
	WBP2	4443.05	7196.62	1.60853	0.68574	7.04164e-09	1.1228e-07
	POP7	4127.81	2451.63	0.599472	-0.738236	7.22021e-09	1.14954e-07
	TNFRSF10A	3579.87	5762.16	1.59596	0.674425	7.28964e-09	1.15919e-07
	ESRP2	4720.3	7443.24	1.56118	0.642638	7.4624e-09	1.18402e-07
	SEMA3F	1196.25	2194.48	1.80342	0.850737	7.46378e-09	1.18402e-07
	MMS22L	1841	993.681	0.551832	-0.857699	7.5501e-09	1.19627e-07
	SERTAD1	1260.35	2414.12	1.87204	0.904609	7.61588e-09	1.20524e-07
	MLYCD	256.825	651.541	2.35554	1.23606	7.75254e-09	1.22539e-07
	PSMG1	3922.83	2369.42	0.61161	-0.709316	7.76686e-09	1.22617e-07
	LRRC20	2002.75	1015.55	0.525948	-0.927007	8.0227e-09	1.26504e-07
	TMEM64	1483.25	2606.26	1.7274	0.788602	8.0713e-09	1.27118e-07
	ENC1	2824.99	4790.5	1.66981	0.739684	8.10591e-09	1.27412e-07
	MAPK13	2736.44	4482.3	1.62013	0.696111	8.10934e-09	1.27412e-07
	PRF1	38.8378	232.998	3.83819	1.94043	8.38274e-09	1.3155e-07
	BCOR	2829.56	1615.18	0.581784	-0.781445	8.59213e-09	1.34675e-07
	ITPRIPL2	2484.79	4091.01	1.62712	0.702324	8.81131e-09	1.37946e-07
	ALDH1A3	25890.2	38646.8	1.48313	0.568649	8.9913e-09	1.40596e-07
	FOSL1	10332.7	6687.35	0.6532	-0.614403	9.10054e-09	1.42135e-07
	ADM2	173.768	529.796	2.74196	1.45521	9.43279e-09	1.47149e-07
	RALGAPB	2538.62	4223.77	1.64069	0.714305	9.7369e-09	1.51713e-07
	TMEM106C	5219.61	3228.47	0.626067	-0.675612	1.0018e-08	1.55908e-07
	YPEL5	198.462	541.859	2.49786	1.32069	1.07605e-08	1.67266e-07
	HAUS6	1806.83	969.831	0.549442	-0.86396	1.09259e-08	1.69636e-07
	FKBP4	23752.8	15734.2	0.666343	-0.585663	1.12109e-08	1.73854e-07
	CENPM	1390.86	704.208	0.520947	-0.94079	1.1353e-08	1.75852e-07
	EXOSC8	2984.72	1737.46	0.591648	-0.75719	1.1657e-08	1.80347e-07
	LMBR1L	637.679	1273.85	1.9352	0.952479	1.17402e-08	1.81421e-07
	LINC00482	128.317	407.219	2.77122	1.47052	1.20421e-08	1.85867e-07
	PRSS8	1158.62	2161.17	1.82434	0.867378	1.21394e-08	1.87148e-07
	TPRKB	2127.7	1173.77	0.56351	-0.827487	1.22277e-08	1.88289e-07
	EFHD2	7633.51	4859.11	0.643958	-0.634961	1.24638e-08	1.91701e-07
	LRRC41	1737.97	2948.09	1.6713	0.740973	1.36271e-08	2.09348e-07
	NUP205	6712.94	4246.52	0.639191	-0.645682	1.37536e-08	2.11044e-07
	TAF5	974.155	452.665	0.485686	-1.0419	1.41336e-08	2.16621e-07
	PLA2G4D	0.571951	74.6951	4.73596	2.24366	1.41755e-08	2.17011e-07
	VPS13D	2820.03	4682.61	1.63362	0.708068	1.42309e-08	2.17605e-07
	PPP2CA	11929.8	7717.99	0.653375	-0.614017	1.44087e-08	2.20068e-07
	PDS5B	1536.1	802.264	0.536776	-0.897607	1.48128e-08	2.25977e-07
	RPA1	14332.7	9468.02	0.665449	-0.587599	1.51633e-08	2.31056e-07
	MFSD4	27.2177	174.604	3.90492	1.96529	1.57021e-08	2.38989e-07
	CEP78	1650.37	879.015	0.546059	-0.872871	1.58942e-08	2.41353e-07
	FAM134C	986.964	1820.45	1.80228	0.849822	1.58905e-08	2.41353e-07
	PRIM2	1364.11	696.725	0.526127	-0.926518	1.59247e-08	2.41537e-07
	STAG1	3472.8	2095.13	0.611274	-0.710109	1.67957e-08	2.54454e-07
	TGFBR1	948.617	1745.68	1.79859	0.846869	1.73279e-08	2.62214e-07
	C2orf88	55.8247	252.28	3.36804	1.75191	1.78337e-08	2.69557e-07
	C2orf69	1291.31	650.277	0.520195	-0.942874	1.78595e-08	2.69637e-07
	STX16	2180.96	3647.84	1.64907	0.721653	1.80579e-08	2.72319e-07
	EIF5	16162.5	10359	0.648684	-0.624411	1.81451e-08	2.7332e-07
	SYNE1	282.005	708.865	2.3298	1.22021	1.82868e-08	2.75139e-07
	TMEM109	3151.18	1832.99	0.590998	-0.758774	1.83171e-08	2.75281e-07
	IL17RB	727.554	260.827	0.395542	-1.3381	1.85201e-08	2.78013e-07
	RRP36	4730.29	2942.58	0.629392	-0.66797	1.86357e-08	2.79429e-07
	ARPC5L	6716.32	4246.91	0.63869	-0.646811	1.87287e-08	2.80504e-07
	PIK3C2B	642.572	1268.27	1.91293	0.935783	1.89746e-08	2.83862e-07
	KLF15	85.6567	316.133	3.02441	1.59666	1.92118e-08	2.87084e-07
	BUB3	15126.6	9841.91	0.658477	-0.602794	1.93068e-08	2.88175e-07
	LRP1	494.775	2903.48	3.78642	1.92083	1.95309e-08	2.90975e-07
	SDC1	4714.98	8163.55	1.70541	0.770117	1.95386e-08	2.90975e-07
	PHLDA1	16792.4	25035.4	1.4816	0.56716	1.97701e-08	2.94088e-07
	RBM15	1442.43	686.837	0.496234	-1.01091	1.98211e-08	2.94514e-07
	ZFC3H1	2165.39	3564.18	1.6267	0.701946	1.98848e-08	2.95127e-07
	MPP7	4857.21	2886.88	0.603704	-0.728086	2.01163e-08	2.98226e-07
	GLRX5	3936.84	2403.69	0.618018	-0.694279	2.0475e-08	3.03201e-07
	PCMTD1	190.245	538.966	2.53633	1.34274	2.06178e-08	3.04971e-07
	PSMD12	9836.32	6290.97	0.646943	-0.62829	2.06878e-08	3.05663e-07
	NIF3L1	2373.41	1351.57	0.58017	-0.785452	2.08526e-08	3.07751e-07
	LINC00173	562.732	1138.3	1.96196	0.972295	2.13079e-08	3.14119e-07
	LMNA	30235	46294.6	1.51854	0.602681	2.18768e-08	3.22143e-07
	SMC6	2345.31	1348.82	0.585214	-0.772965	2.23017e-08	3.28032e-07
	AKR1B10	14.213	140.483	4.30693	2.10666	2.26233e-08	3.3239e-07
	TUBA4A	5664.91	3540.54	0.629839	-0.666946	2.34157e-08	3.43648e-07
	CALD1	3657.84	5760.95	1.55899	0.640611	2.35923e-08	3.45854e-07
	SKP2	2113.75	1162.55	0.560625	-0.834892	2.39519e-08	3.50734e-07
	NAB2	4275.41	7008.02	1.63442	0.708775	2.4281e-08	3.54762e-07
	TNFRSF6B	88.1685	327.127	3.01535	1.59232	2.4266e-08	3.54762e-07
	NUP98	11595.5	7613.39	0.662596	-0.593799	2.49601e-08	3.64279e-07
	FANCE	1597.68	839.906	0.54026	-0.888275	2.54075e-08	3.70396e-07
	MAST4	28.5379	175.604	3.8066	1.9285	2.64644e-08	3.85377e-07
	GRN	5268.27	8453.23	1.58267	0.662361	2.66178e-08	3.87182e-07
	CSE1L	15742	10396.9	0.665788	-0.586866	2.66853e-08	3.87735e-07
	LINC00086	12.3208	128.118	4.31174	2.10827	2.78825e-08	4.04682e-07
	GABARAPL1	1128.08	2011.64	1.75054	0.807799	2.83459e-08	4.10953e-07
	C14orf80	1797.85	976.168	0.554732	-0.850137	2.85814e-08	4.1391e-07
	KIF4B	425.159	140.483	0.376171	-1.41054	2.90613e-08	4.20397e-07
	HAUS3	1094.37	533.234	0.506705	-0.980781	2.93788e-08	4.24521e-07
	MND1	890.695	410.619	0.483318	-1.04896	3.01248e-08	4.34824e-07
	CHRAC1	2478.91	1423.84	0.586225	-0.770474	3.12496e-08	4.50564e-07
	PCGF6	1059	505.623	0.49786	-1.00619	3.16599e-08	4.55979e-07
	WBP11	5691.8	3629.64	0.643895	-0.635102	3.22346e-08	4.63747e-07
	ZNF862	282.129	685.896	2.2601	1.17639	3.23118e-08	4.64349e-07
	NTSR1	10340	16997.4	1.63212	0.706751	3.24692e-08	4.66102e-07
	KLF11	483.329	166.774	0.389961	-1.3586	3.2834e-08	4.70824e-07
	RNASEH2A	3119.02	1875.08	0.610005	-0.713107	3.31022e-08	4.74153e-07
	CDC25B	11075.5	7157.65	0.654135	-0.61234	3.31623e-08	4.74496e-07
	TFDP2	1293.94	2266.01	1.71474	0.777989	3.32522e-08	4.75264e-07
	L3MBTL1	209.574	552.475	2.4225	1.2765	3.4452e-08	4.91877e-07
	DENND2D	1046.45	1873.5	1.75309	0.809898	3.49924e-08	4.99051e-07
	WBSCR27	319.499	742.357	2.20076	1.138	3.57858e-08	5.09812e-07
	PLA2G6	914.396	1671.53	1.79004	0.839989	3.60519e-08	5.13047e-07
	CDK1	8451.72	4891.73	0.593224	-0.753351	3.65136e-08	5.19054e-07
	PTTG1	4180.52	2498.47	0.602403	-0.731199	3.72376e-08	5.28774e-07
	CCT4	28036.1	18976.8	0.681535	-0.553141	3.80845e-08	5.40215e-07
	TIMM10	2680.12	1558.17	0.59321	-0.753385	3.90633e-08	5.53502e-07
	MRPL17	6443.71	4156.46	0.650699	-0.619938	3.92587e-08	5.55671e-07
	CCT6A	26549.6	17696.2	0.671946	-0.573582	3.99045e-08	5.64204e-07
	ARSA	292.023	687.537	2.21258	1.14573	4.13356e-08	5.8381e-07
	CARHSP1	2768.45	1528.54	0.566235	-0.820528	4.13944e-08	5.84012e-07
	SNHG1	12923.4	8336.06	0.652407	-0.616156	4.22746e-08	5.95791e-07
	DDR1	8898.05	13330.2	1.48748	0.572875	4.27094e-08	6.01273e-07
	MAST3	790.323	1510.96	1.86468	0.898932	4.30171e-08	6.04956e-07
	DNAJA1	16332.6	10625.3	0.657453	-0.605039	4.31344e-08	6.05958e-07
	SNRNP40	5664.73	3591.93	0.64142	-0.640658	4.31993e-08	6.06221e-07
	NOP56	36790.5	25039.7	0.685395	-0.544992	4.34225e-08	6.08702e-07
	USP37	1625.54	855.442	0.542246	-0.88298	4.37103e-08	6.12083e-07
	CALU	12141.7	8072.11	0.669718	-0.578374	4.48876e-08	6.27901e-07
	MATR3	15306.6	9630.84	0.637921	-0.64855	4.50262e-08	6.29169e-07
	KLHL24	154.829	445.578	2.57867	1.36663	4.52718e-08	6.31929e-07
	H1FX	5107.63	2820.57	0.559474	-0.837856	4.59871e-08	6.41232e-07
	PDE4C	36.2831	193.542	3.57142	1.8365	4.70941e-08	6.55971e-07
	C15orf52	573.146	1148.08	1.93264	0.950574	4.742e-08	6.59812e-07
	LYAR	6282.86	3950.93	0.636373	-0.652056	4.85896e-08	6.75369e-07
	EPCAM	14858.5	9954.52	0.675216	-0.566579	4.87446e-08	6.76809e-07
	TNFRSF1A	4040.5	6394.02	1.57026	0.651006	4.92593e-08	6.83232e-07
	DLG5	5346.12	8385.33	1.55352	0.635544	5.16615e-08	7.15041e-07
	RCC1	19447.7	13142.9	0.680722	-0.554863	5.16485e-08	7.15041e-07
	CFLAR	1246.87	2233.72	1.76044	0.815933	5.1853e-08	7.16936e-07
	SSPO	23.6311	156.717	3.83066	1.93759	5.29718e-08	7.31635e-07
	GPSM1	1144.3	2021.75	1.73996	0.799052	5.37786e-08	7.41997e-07
	SNX33	467.829	989.265	2.02492	1.01787	5.54076e-08	7.63671e-07
	SRA1	3243.83	5107.45	1.5585	0.640162	5.66393e-08	7.79829e-07
	CDKN2C	534.902	179.082	0.379306	-1.39856	5.71231e-08	7.85668e-07
	SRGAP3	176.297	538.361	2.71674	1.44188	5.77284e-08	7.93162e-07
	ZNF440	349.173	776.993	2.1086	1.07628	5.89355e-08	8.089e-07
	PRSS30P	246.086	610.201	2.2901	1.19541	5.90369e-08	8.09446e-07
	EBP	5289.19	3240.76	0.618101	-0.694086	5.93429e-08	8.12793e-07
	EDEM1	1057.32	1876.08	1.73676	0.796397	5.97639e-08	8.17707e-07
	CCDC137	7251.83	4736.02	0.658276	-0.603235	6.03975e-08	8.24802e-07
	NUP35	1769.23	970.566	0.562659	-0.829666	6.04708e-08	8.24802e-07
	NUP93	9297.75	6149.71	0.666583	-0.585144	6.04346e-08	8.24802e-07
	TAGLN2	5425.96	3450.06	0.643424	-0.636159	6.10388e-08	8.31686e-07
	CORO1C	8652.48	5687.32	0.662953	-0.593021	6.18943e-08	8.42468e-07
	SOX12	2353.43	4019.3	1.6918	0.758557	6.21884e-08	8.45595e-07
	TIPARP	3150.58	1918.69	0.613409	-0.705078	6.56168e-08	8.9129e-07
	DUSP14	2348.06	3889.68	1.62865	0.70368	6.77901e-08	9.19859e-07
	SYNC	48.1439	224.5	3.34354	1.74138	6.79819e-08	9.21509e-07
	ARID4A	240.431	599.918	2.29786	1.20029	6.93487e-08	9.39067e-07
	DPYSL4	272.792	671.956	2.28874	1.19455	7.01002e-08	9.48265e-07
	SETD8	2137.01	1236.77	0.589514	-0.762402	7.16936e-08	9.68823e-07
	DDX23	8544.12	5639.6	0.665535	-0.587414	7.25088e-08	9.78831e-07
	MR1	230.174	579.123	2.32256	1.21571	7.33759e-08	9.8952e-07
	SNHG7	5406.8	3431.26	0.638607	-0.647	7.36843e-08	9.92659e-07
	RSPH3	568.356	1187.55	1.99163	0.993947	7.4416e-08	1.00149e-06
	EVI5L	587.593	1198.22	1.98522	0.989297	7.71179e-08	1.03679e-06
	KIAA1217	498.924	1037.62	1.99309	0.995007	7.74401e-08	1.04006e-06
	PRRG1	578.999	1137.63	1.89991	0.925928	7.76582e-08	1.04192e-06
	TRA2B	11888.9	7849.86	0.667153	-0.583911	8.02245e-08	1.07525e-06
	SERPINE2	4254.68	2656.85	0.633847	-0.657794	8.04067e-08	1.0766e-06
	DUSP11	1170.74	2053	1.72202	0.7841	8.05334e-08	1.0772e-06
	RPF1	5986.73	3759.56	0.635652	-0.653692	8.06207e-08	1.07727e-06
	ETF1	16993.5	11344.1	0.672826	-0.571695	8.16659e-08	1.09012e-06
	YEATS4	1555.36	840.812	0.555998	-0.846849	8.36964e-08	1.11609e-06
	ABHD2	3272.27	1973.24	0.610787	-0.711259	8.39516e-08	1.11836e-06
	DUS3L	4730.9	2999.41	0.638843	-0.646468	8.46439e-08	1.12644e-06
	ACTL6A	3433.21	2117.3	0.624332	-0.679616	8.62906e-08	1.14719e-06
	AMZ2P1	576.199	1130.1	1.89659	0.923408	8.68918e-08	1.15402e-06
	INTS7	1798.15	1014.47	0.575864	-0.7962	8.72128e-08	1.15711e-06
	ABCA7	3061.48	4823.78	1.56223	0.643606	8.79063e-08	1.16514e-06
	YBX3P1	2157.71	3487.9	1.59585	0.674326	8.82033e-08	1.16789e-06
	TMOD2	355.851	780.673	2.08793	1.06208	8.87664e-08	1.17417e-06
	KDM4A	2549.41	4195.65	1.62026	0.696223	9.09435e-08	1.20175e-06
	GJB3	1882.64	3079.95	1.61283	0.68959	9.1208e-08	1.20404e-06
	SLC16A5	1543.02	2578.02	1.6453	0.71835	9.37353e-08	1.23616e-06
	DHRS7	1673.33	2783.26	1.63829	0.712193	9.43031e-08	1.24159e-06
	SLC1A3	650.14	1293.01	1.92666	0.946098	9.43366e-08	1.24159e-06
	ZMYND19	4010.78	2449.9	0.619074	-0.691816	9.45762e-08	1.2435e-06
	NOP58	9043.74	5920.54	0.661459	-0.596276	9.47229e-08	1.24418e-06
	DLAT	6409.14	3985.19	0.632059	-0.661869	9.49586e-08	1.24603e-06
	SHC1	11877.6	17584.4	1.46797	0.553827	9.58021e-08	1.25585e-06
	SOGA1	946.742	1696.88	1.7516	0.808677	9.69619e-08	1.26979e-06
	RNF219	1280.97	674.744	0.542529	-0.882227	9.82812e-08	1.28578e-06
	ATAD3A	5200.2	3292.33	0.638814	-0.646531	9.89837e-08	1.29368e-06
	RQCD1	5568.49	3601.26	0.65312	-0.614581	9.92146e-08	1.29541e-06
	LENG8	8729.02	12928.7	1.47102	0.556819	9.96501e-08	1.29962e-06
	SASS6	1140.5	581.853	0.527848	-0.921806	9.9735e-08	1.29962e-06
	DDX3X	20082.8	13546	0.679793	-0.556832	1.0179e-07	1.32509e-06
	IFRD1	1847.26	1051.04	0.580593	-0.784401	1.02543e-07	1.33356e-06
	TSKU	1525.31	2586.66	1.66974	0.73962	1.03804e-07	1.34863e-06
	CENPQ	753.57	327.428	0.462835	-1.11143	1.08029e-07	1.40214e-06
	ODF2	4431.54	2819.93	0.643134	-0.636808	1.08776e-07	1.41044e-06
	FBXO45	1884.73	1073.83	0.581725	-0.78159	1.10234e-07	1.42793e-06
	PTRF	12956.4	8671.75	0.672459	-0.572483	1.10878e-07	1.43486e-06
	SMIM14	162.274	457.076	2.49686	1.32011	1.11402e-07	1.44023e-06
	POLD1	6278.97	4013.61	0.645325	-0.631902	1.12401e-07	1.45092e-06
	STEAP3	3381.64	5382.92	1.58161	0.661397	1.12451e-07	1.45092e-06
	ARHGDIA	38451.4	26415.2	0.69011	-0.535101	1.14688e-07	1.47833e-06
	ZKSCAN1	2585.63	4151.63	1.58364	0.663247	1.17017e-07	1.50687e-06
	CYP4F2	15.5547	134.546	3.99265	1.99735	1.1794e-07	1.51728e-06
	PRKD2	3207.86	4980.16	1.53742	0.620507	1.22267e-07	1.5714e-06
	STEAP2	404.64	856.511	2.02136	1.01533	1.24048e-07	1.59191e-06
	XPO1	16947.1	11382.1	0.677427	-0.561864	1.24104e-07	1.59191e-06
	RNF44	2081	3347.87	1.58889	0.668015	1.24357e-07	1.59359e-06
	ADNP2	3949.64	2405.62	0.618117	-0.694048	1.24633e-07	1.59557e-06
	ZNF621	1591.16	2676.15	1.65249	0.72464	1.25023e-07	1.599e-06
	LOC100506710	1589.11	2746.04	1.69279	0.759399	1.27698e-07	1.63163e-06
	ZFHX2	23.2569	150.258	3.71563	1.8936	1.30392e-07	1.66444e-06
	BCL7B	2464.14	1459.64	0.601215	-0.734048	1.30756e-07	1.66745e-06
	EFNB2	1607.91	865.453	0.551198	-0.859359	1.31686e-07	1.67768e-06
	CPSF6	9069.86	6008.11	0.668075	-0.581917	1.31817e-07	1.67773e-06
	ALG5	2572.15	1541.54	0.60942	-0.714492	1.33757e-07	1.70078e-06
	ATG2A	1154.95	1997.89	1.69848	0.764248	1.34971e-07	1.71455e-06
	PNPO	2579.02	4145.78	1.58873	0.667876	1.36913e-07	1.73754e-06
	DARS2	3100.5	1912.21	0.624747	-0.678655	1.37299e-07	1.74076e-06
	NSUN2	12274.2	8268.92	0.679151	-0.558197	1.37826e-07	1.74576e-06
	TOMM5	7886.1	5180.46	0.663739	-0.591313	1.39293e-07	1.76264e-06
	NMU	2321.49	1269.1	0.563701	-0.826997	1.40074e-07	1.77081e-06
	SNRPD1	5568.69	3549.75	0.644123	-0.634591	1.41906e-07	1.79225e-06
	C10orf54	1440.44	2410.52	1.64682	0.719685	1.42573e-07	1.79895e-06
	AMER1	578.923	1253.42	2.08039	1.05686	1.43562e-07	1.80969e-06
	FKBPL	795.335	356.447	0.474192	-1.07646	1.454e-07	1.83109e-06
	RAB40B	345.818	769.181	2.1107	1.07772	1.51877e-07	1.91083e-06
	GTF3C5	7370.88	4865.39	0.665196	-0.588149	1.55507e-07	1.9539e-06
	LDB1	6048.65	9126.31	1.49758	0.582636	1.55598e-07	1.9539e-06
	EMC8	6389.42	4201.88	0.662873	-0.593196	1.56677e-07	1.96557e-06
	DNA2	1001.83	498.749	0.517664	-0.949912	1.57368e-07	1.97236e-06
	FAM214B	349.452	761.71	2.07106	1.05037	1.57704e-07	1.97469e-06
	NOL3	2108.02	3385.84	1.58616	0.665541	1.59623e-07	1.99681e-06
	ACTG1	296303	207731	0.704882	-0.504546	1.61825e-07	2.02092e-06
	C19orf82	85.8378	303.371	2.87357	1.52285	1.61859e-07	2.02092e-06
	TSPYL1	2986.46	4644.26	1.53902	0.622016	1.63412e-07	2.03838e-06
	C1RL	395.875	833.455	2.01329	1.00956	1.63992e-07	2.04368e-06
	C14orf159	1756.66	2861.85	1.61002	0.687076	1.65804e-07	2.0643e-06
	CDR2	2580.97	1546.15	0.610222	-0.712594	1.68052e-07	2.0903e-06
	CYP2S1	1185.18	2036.19	1.68629	0.753852	1.69395e-07	2.10502e-06
	HNRNPH1	26502	16592.2	0.634048	-0.657337	1.73313e-07	2.15167e-06
	RAD23B	24334.5	16536.6	0.684884	-0.546069	1.767e-07	2.19165e-06
	SLC19A1	4253.49	2621.33	0.617807	-0.694773	1.76916e-07	2.19226e-06
	TRIM3	631.602	1198.72	1.84209	0.881347	1.77728e-07	2.20024e-06
	LAMC1	7567.07	11175.5	1.46644	0.55232	1.77918e-07	2.20053e-06
	TCOF1	17454.6	11976.9	0.690553	-0.534176	1.80211e-07	2.22678e-06
	SH3TC1	115.932	358.719	2.66808	1.4158	1.81208e-07	2.237e-06
	MRI1	703.417	1340.71	1.84569	0.884163	1.8599e-07	2.29387e-06
	EIF2S1	11266.9	7459.38	0.668087	-0.581892	1.89137e-07	2.3305e-06
	KCTD15	1962.42	1137.48	0.590717	-0.759462	1.91052e-07	2.35189e-06
	PIAS3	1785.23	2912.23	1.61056	0.687562	1.92931e-07	2.3728e-06
	UTP11L	4859.57	3104.21	0.647098	-0.627943	1.93591e-07	2.37868e-06
	TSC22D1	8259.28	12912.1	1.54675	0.629241	1.96584e-07	2.41321e-06
	NCBP1	4630.83	2894.84	0.634102	-0.657213	2.02079e-07	2.47835e-06
	PSD4	390.535	829.529	2.02481	1.01779	2.05418e-07	2.51694e-06
	TMEM263	641.213	1224.32	1.84276	0.881865	2.09832e-07	2.56864e-06
	NUP188	17631	11904.1	0.678952	-0.558619	2.10633e-07	2.57603e-06
	CEP135	1218.97	643.754	0.544833	-0.876114	2.12219e-07	2.59302e-06
	IP6K2	4264.17	6444.72	1.49877	0.583781	2.14617e-07	2.61989e-06
	CUL9	1927.22	3098.33	1.58651	0.665855	2.2113e-07	2.69688e-06
	RAI14	3778.41	2375.41	0.634583	-0.656118	2.22819e-07	2.71496e-06
	COA7	2833.06	1729.73	0.618309	-0.693599	2.245e-07	2.7329e-06
	MEGF6	1268.03	2202.65	1.70066	0.766098	2.26387e-07	2.75218e-06
	SNRPB	27253.6	18913.1	0.698264	-0.518155	2.26502e-07	2.75218e-06
	NFIX	3826.82	2406.5	0.636654	-0.651419	2.27885e-07	2.76387e-06
	SFXN1	6879.63	4564.31	0.669172	-0.579551	2.27731e-07	2.76387e-06
	IDUA	170.703	471.592	2.44783	1.29151	2.29304e-07	2.77851e-06
	HOMEZ	369.742	795.857	2.03651	1.0261	2.32357e-07	2.81291e-06
	GALNT14	1691.8	952.496	0.57701	-0.793333	2.44675e-07	2.9593e-06
	EML2	2715.4	4222.45	1.54	0.622932	2.45316e-07	2.96433e-06
	PTP4A2	6863.19	4561.03	0.670201	-0.577334	2.45674e-07	2.96592e-06
	CDC25C	1082.2	522.831	0.50612	-0.982448	2.47327e-07	2.98314e-06
	DKK1	35332.3	50664.4	1.42774	0.513733	2.52306e-07	3.0404e-06
	SMPD4	6662.29	4409.68	0.666793	-0.584689	2.54477e-07	3.06341e-06
	SPRY1	65.1784	282.566	3.15619	1.65819	2.54681e-07	3.06341e-06
	ANP32A	10262.2	6939.88	0.681111	-0.554038	2.62667e-07	3.15657e-06
	NLRX1	914.234	1616.14	1.73065	0.791313	2.6598e-07	3.19054e-06
	PTDSS1	5781.86	3808.6	0.664686	-0.589254	2.65821e-07	3.19054e-06
	KHSRP	17500.9	11509.2	0.661045	-0.597179	2.75585e-07	3.30275e-06
	ETS1	898.081	432.193	0.50546	-0.984332	2.75937e-07	3.30395e-06
	RTN4	13186.5	9034.81	0.689571	-0.53623	2.78406e-07	3.33048e-06
	WDR81	1677.83	2731.28	1.60515	0.682712	2.81301e-07	3.36204e-06
	XRCC5	39473.1	27256.2	0.695362	-0.524164	2.84125e-07	3.39271e-06
	PRPF19	14744.2	10037.8	0.683574	-0.54883	2.86911e-07	3.42287e-06
	CEBPZ	3962.05	2531.65	0.646018	-0.630354	2.87322e-07	3.42466e-06
	TK1	18230.8	12433.1	0.68659	-0.542479	2.93767e-07	3.49831e-06
	KLLN	38.1109	195.084	3.36489	1.75056	2.95022e-07	3.51007e-06
	SKA2	1803.97	1036.83	0.586873	-0.76888	2.95394e-07	3.51131e-06
	TNPO1	8990.37	6078.11	0.680945	-0.554391	2.96913e-07	3.52618e-06
	SATB1	68.3862	254.721	2.93883	1.55524	3.03437e-07	3.6004e-06
	PEG10	1040.49	437.903	0.45814	-1.12614	3.06826e-07	3.63733e-06
	APOBEC3H	14.5442	118.885	3.80481	1.92782	3.07589e-07	3.64091e-06
	CCT2	29244.4	20302.5	0.698707	-0.51724	3.07683e-07	3.64091e-06
	CIRH1A	11722.5	7864.24	0.677961	-0.560726	3.12056e-07	3.68933e-06
	USP20	880.832	1562.6	1.73168	0.792174	3.16797e-07	3.74203e-06
	HNRNPA0	11541.6	7792.5	0.679509	-0.557435	3.22622e-07	3.80741e-06
	CHMP1B	1800.37	2897.27	1.5877	0.666942	3.26514e-07	3.84988e-06
	RBBP8	4773.85	3068.59	0.649525	-0.622543	3.27728e-07	3.85844e-06
	SF1	16928.8	11694.8	0.695353	-0.524183	3.27828e-07	3.85844e-06
	HECTD4	2680.56	4247.07	1.56449	0.645694	3.30621e-07	3.88435e-06
	XRCC2	867.265	406.933	0.49292	-1.02058	3.30587e-07	3.88435e-06
	HDGF	28514.3	19901.7	0.702064	-0.510325	3.33073e-07	3.90967e-06
	KIAA0040	1120.91	1988.35	1.73489	0.794847	3.35834e-07	3.93855e-06
	SCRN1	7283.81	4827.21	0.669394	-0.579073	3.41439e-07	4.00071e-06
	FAM222A	477.295	137.137	0.354854	-1.4947	3.4198e-07	4.00349e-06
	AHSA2	1490.24	2452.58	1.61922	0.695297	3.42678e-07	4.00808e-06
	CTSC	3156.68	1954.14	0.626953	-0.673572	3.49817e-07	4.08794e-06
	ACD	2258.41	1346.91	0.607286	-0.719552	3.50988e-07	4.09798e-06
	SAT2	988.823	1722.07	1.7048	0.769605	3.77661e-07	4.40549e-06
	NACC2	3150.08	4813.01	1.51325	0.597654	3.79743e-07	4.42585e-06
	BTBD10	1019.02	1760.84	1.69189	0.758637	3.82345e-07	4.45221e-06
	NIPAL1	258.097	600.048	2.16889	1.11696	3.82993e-07	4.45582e-06
	F3	8311.84	5175.43	0.64558	-0.631332	3.86446e-07	4.49201e-06
	NUDT21	9085.84	6123.59	0.679837	-0.55674	3.94867e-07	4.58583e-06
	TTYH3	2371.75	7777.9	2.73307	1.45052	3.99426e-07	4.63468e-06
	U2AF2	28937.8	20227.4	0.702443	-0.509547	4.04779e-07	4.69265e-06
	C11orf83	2492.73	1476.52	0.601088	-0.734351	4.05826e-07	4.69851e-06
	RPL23AP53	223.363	547.965	2.25301	1.17186	4.06e-07	4.69851e-06
	PGAM5	7376.66	4872.79	0.664944	-0.588695	4.09337e-07	4.73296e-06
	PPP1R13L	1679.3	2721.08	1.60027	0.678314	4.18438e-07	4.83393e-06
	FIG4	517.403	1029.78	1.90015	0.926113	4.31186e-07	4.97683e-06
	BNIP3L	570.856	1085.04	1.84761	0.885657	4.39596e-07	5.06613e-06
	NIP7	6854.57	4592.53	0.676073	-0.56475	4.39695e-07	5.06613e-06
	CAPRIN1	18089.6	12456.5	0.693823	-0.527361	4.40877e-07	5.07383e-06
	CROCCP2	904.568	1599.2	1.72507	0.786652	4.41136e-07	5.07383e-06
	FAM111A	1865.63	1081.18	0.592537	-0.755022	4.41982e-07	5.07912e-06
	ZNF787	2634.83	1608.08	0.61811	-0.694064	4.4891e-07	5.15423e-06
	TMEM198B	471.844	941.742	1.91415	0.936706	4.53248e-07	5.19949e-06
	ZNF516	650.167	1260.36	1.87364	0.905847	4.5518e-07	5.2171e-06
	PCMT1	4955.72	3223.53	0.657332	-0.605306	4.72204e-07	5.40749e-06
	CREBRF	157.036	422.702	2.40879	1.26831	4.77455e-07	5.46287e-06
	ANKRD32	702.109	319.39	0.481483	-1.05444	4.8576e-07	5.55305e-06
	PI4K2A	2656.3	4101.98	1.52761	0.611279	4.93558e-07	5.63729e-06
	STRADA	1190.74	2015.48	1.65907	0.730373	4.94568e-07	5.64392e-06
	SAE1	12587.9	8614.1	0.689492	-0.536394	5.00266e-07	5.70398e-06
	RASSF6	38.0204	181.505	3.25551	1.70288	5.02861e-07	5.7286e-06
	TCEB3	4801.1	3154.69	0.663479	-0.591877	5.03611e-07	5.73217e-06
	AK1	1980.87	3187.06	1.59154	0.670426	5.06837e-07	5.7639e-06
	BBS2	802.791	1454.85	1.75838	0.814247	5.15064e-07	5.85239e-06
	ARNTL2	1302.59	717.368	0.565615	-0.822109	5.16923e-07	5.86446e-06
	RAB3A	478.181	980.724	1.97506	0.981898	5.17019e-07	5.86446e-06
	HSPA8	134825	95304.6	0.711398	-0.491272	5.20616e-07	5.90016e-06
	CYHR1	1160.31	2007.31	1.70564	0.77031	5.26268e-07	5.95394e-06
	KDM1A	10569.8	7231.54	0.688857	-0.537723	5.26019e-07	5.95394e-06
	SNRPD3	9139.96	6237.37	0.687222	-0.541151	5.27573e-07	5.96357e-06
	EFNA1	668.543	1247.11	1.81272	0.858159	5.29024e-07	5.97483e-06
	C10orf118	557.501	1098.86	1.88485	0.914449	5.60073e-07	6.32007e-06
	HN1	16848.4	11731.8	0.700748	-0.513032	5.66239e-07	6.38416e-06
	C11orf84	3808.32	2440.11	0.6476	-0.626826	5.67854e-07	6.39687e-06
	CENPJ	1747.74	999.085	0.582892	-0.778699	5.88217e-07	6.62059e-06
	NFIL3	1369.84	753.74	0.566483	-0.819896	5.89188e-07	6.62584e-06
	TMEM40	303.357	726.885	2.21941	1.15018	5.99438e-07	6.73534e-06
	GALE	4506.95	6720.25	1.47808	0.563725	6.06334e-07	6.807e-06
	PNN	13470.9	9287.26	0.693826	-0.527354	6.19152e-07	6.94497e-06
	PAK1IP1	2905.43	1814.3	0.633747	-0.658021	6.27205e-07	7.0293e-06
	CDK4	13998.3	9554.18	0.688819	-0.537804	6.30382e-07	7.05287e-06
	PGBD2	448.523	891.079	1.9071	0.931383	6.30055e-07	7.05287e-06
	HBP1	430.185	893.019	1.96283	0.972939	6.34886e-07	7.09721e-06
	LRP2BP	86.1595	284.327	2.73933	1.45383	6.40289e-07	7.15153e-06
	TNPO3	5794.69	3866.62	0.67327	-0.570743	6.41088e-07	7.15436e-06
	APBB2	3098.24	4763.96	1.52108	0.605092	6.41708e-07	7.15521e-06
	SKIV2L2	5925.16	3905.38	0.665705	-0.587045	6.42394e-07	7.15678e-06
	LINC00657	8046.9	11994.2	1.4818	0.567351	6.42991e-07	7.15736e-06
	S100A2	516.466	995.568	1.85914	0.894633	6.44643e-07	7.16967e-06
	LOC100130899	184.575	495.39	2.41991	1.27495	6.50623e-07	7.23007e-06
	ITGB1BP1	2715.59	1692.5	0.631531	-0.663075	6.52525e-07	7.24507e-06
	TNS4	1695.04	2715.84	1.57998	0.659908	6.58518e-07	7.30543e-06
	DEGS1	2883.51	1731.07	0.603996	-0.727388	6.70068e-07	7.42103e-06
	RRP7A	6179.99	4073.67	0.663373	-0.592107	6.69836e-07	7.42103e-06
	FAM83F	929.988	1607.65	1.6924	0.759067	6.78447e-07	7.5075e-06
	MRPS2	7274.31	4922.2	0.681136	-0.553985	6.81259e-07	7.53227e-06
	ONECUT3	254.549	590.648	2.14468	1.10076	6.83309e-07	7.54858e-06
	IQGAP3	4144.22	2673.59	0.653572	-0.613582	6.92443e-07	7.64306e-06
	NUPL1	5486.16	3623.66	0.666027	-0.586346	7.13615e-07	7.87014e-06
	DCTN5	3416.93	5141.75	1.4913	0.576573	7.21339e-07	7.94865e-06
	YWHAE	30750.3	21667.6	0.708685	-0.496783	7.22236e-07	7.95186e-06
	ZGRF1	1090.84	567.143	0.536399	-0.898623	7.23269e-07	7.95657e-06
	URB2	4159.11	2716.26	0.660198	-0.599029	7.3444e-07	8.07269e-06
	LINC00174	116.642	347.693	2.55471	1.35316	7.36044e-07	8.07681e-06
	SNHG17	1943.49	1145.15	0.599355	-0.738518	7.35768e-07	8.07681e-06
	MRPL1	2178.08	1277.29	0.598456	-0.740683	7.42295e-07	8.1386e-06
	GPR173	150.37	405.224	2.39507	1.26007	7.44545e-07	8.15646e-06
	SYK	531.306	1055.01	1.90981	0.933432	7.46909e-07	8.17555e-06
	FLOT1	3423.67	2179.02	0.645722	-0.631015	7.576e-07	8.28566e-06
	SMIM3	2054.2	3277.07	1.58343	0.663052	7.72316e-07	8.43958e-06
	BIK	511.733	1070.43	1.99027	0.992967	7.7941e-07	8.51002e-06
	LMAN2L	1891.16	1126.51	0.606573	-0.721247	7.93439e-07	8.65042e-06
	TNXB	90.8042	296.087	2.71092	1.43878	7.93587e-07	8.65042e-06
	CCND3	2839.99	1768.14	0.630688	-0.665002	7.9831e-07	8.68749e-06
	P4HTM	1505.5	2437.01	1.59695	0.675323	7.98143e-07	8.68749e-06
	CTDSPL2	1976.82	1185.61	0.610222	-0.712593	8.03452e-07	8.73621e-06
	ADM5	725.817	314.062	0.464842	-1.10519	8.06101e-07	8.75776e-06
	RAB37	176.056	487.63	2.48527	1.3134	8.07286e-07	8.76339e-06
	MBTPS1	7594.47	10986	1.43725	0.523315	8.21754e-07	8.91308e-06
	LOC100130331	1402.04	780.72	0.574483	-0.799665	8.2941e-07	8.9887e-06
	IL17RD	259.244	628.189	2.27198	1.18395	8.30153e-07	8.98933e-06
	LTV1	5167.51	3440.86	0.671745	-0.574014	8.37067e-07	9.05674e-06
	GSPT1	9888.3	6597.19	0.674267	-0.568609	8.45153e-07	9.1367e-06
	DOCK3	530.77	1024.09	1.8561	0.892273	8.58757e-07	9.27613e-06
	GCC2	662.64	1304.58	1.87592	0.907602	8.60481e-07	9.27949e-06
	MAN2B1	1951.37	3178.26	1.60516	0.682716	8.60231e-07	9.27949e-06
	BZW1	6646.51	4420.48	0.67356	-0.570122	8.67159e-07	9.33617e-06
	FTSJ2	3373.61	2149.67	0.644127	-0.634582	8.66508e-07	9.33617e-06
	KLF16	5386.63	3368.23	0.632479	-0.660912	8.70053e-07	9.35966e-06
	F2RL1	9207.97	6151.88	0.672217	-0.573002	8.75137e-07	9.40665e-06
	NRF1	2002.04	1197.72	0.608244	-0.717278	9.12564e-07	9.80092e-06
	TRIM38	740.018	1321.22	1.73946	0.798642	9.17764e-07	9.84871e-06
	FN3KRP	2480.17	1542.5	0.631081	-0.664104	9.20837e-07	9.87363e-06
	FER1L6	4.3349	76.3553	3.83338	1.93862	9.40468e-07	1.00595e-05
	PRRG2	284.576	635.673	2.08959	1.06322	9.39706e-07	1.00595e-05
	RABL2B	669.718	1225.82	1.77476	0.827623	9.39894e-07	1.00595e-05
	C19orf66	609.187	1148.1	1.83606	0.87661	9.5365e-07	1.01922e-05
	SLC39A13	1175.97	1959.97	1.63598	0.710159	9.6073e-07	1.02595e-05
	EXOSC2	5114.79	3405.65	0.671873	-0.573739	9.80214e-07	1.04591e-05
	CREB3L2	1761.22	2845.67	1.60623	0.683677	9.85782e-07	1.05099e-05
	EIF3J	3562.74	2257.73	0.643095	-0.636897	9.98318e-07	1.06177e-05
	HES4	1779.62	1023.75	0.58697	-0.768641	9.9671e-07	1.06177e-05
	PAPOLA	11965.7	8314.66	0.699052	-0.516528	9.97535e-07	1.06177e-05
	FGD5-AS1	3299.77	2089.67	0.640807	-0.642038	1.05182e-06	1.11778e-05
	TSNARE1	480.319	943.949	1.89833	0.924729	1.08348e-06	1.15049e-05
	ALMS1	2158.61	1318.75	0.62054	-0.688404	1.08504e-06	1.15122e-05
	HDAC4	438.385	868.613	1.90662	0.931018	1.08649e-06	1.15182e-05
	HECW1	132.914	375.418	2.48917	1.31566	1.09014e-06	1.15476e-05
	MYO6	3455.53	5351.55	1.53176	0.615187	1.09452e-06	1.15846e-05
	BCKDHA	980.558	1686.25	1.69027	0.757255	1.09698e-06	1.16013e-05
	FAM178A	2825.68	1732.07	0.622114	-0.68475	1.11315e-06	1.17629e-05
	NUP153	5930.94	3978.72	0.677365	-0.561995	1.11707e-06	1.17948e-05
	LOC100507577	102.841	311.302	2.57447	1.36427	1.11897e-06	1.18053e-05
	CEP85L	216.447	512.819	2.18229	1.12584	1.12191e-06	1.18269e-05
	ILF2	22997.8	16272.8	0.711458	-0.491149	1.12523e-06	1.18524e-05
	SLC35E3	206.345	503.378	2.23349	1.1593	1.13169e-06	1.19108e-05
	LZTS2	4307.24	6498.93	1.49883	0.583834	1.14295e-06	1.20197e-05
	LOC101928100	60.4908	244.086	2.97456	1.57267	1.17722e-06	1.23702e-05
	HSP90AA1	125537	90129.6	0.721487	-0.470954	1.22221e-06	1.28225e-05
	RPS6KA1	3647.1	5519.38	1.50352	0.588342	1.22207e-06	1.28225e-05
	KPNA3	5814.28	3929.39	0.681478	-0.553261	1.25004e-06	1.31039e-05
	TMEM201	4471.27	2813.26	0.632938	-0.659864	1.25495e-06	1.3145e-05
	KCNB1	27.5704	148.817	3.31166	1.72755	1.25688e-06	1.31547e-05
	KLC4	251.977	574.136	2.12636	1.08838	1.3149e-06	1.3751e-05
	GUCY1B2	42.8843	186.598	3.07423	1.62023	1.32039e-06	1.37974e-05
	GRWD1	7284.66	4950.96	0.682072	-0.552004	1.33558e-06	1.39451e-05
	CEBPG	2953.75	1890.23	0.647853	-0.626261	1.33695e-06	1.39482e-05
	KCNK5	1209.63	640.628	0.54758	-0.868859	1.37267e-06	1.43076e-05
	MOAP1	682.274	1225.29	1.74971	0.807119	1.37358e-06	1.43076e-05
	MYH15	1292.1	725.801	0.577218	-0.792811	1.38781e-06	1.44445e-05
	SF3B4	8978.87	6179.88	0.692245	-0.530646	1.39114e-06	1.44676e-05
	DDN	2247.99	1319.28	0.595044	-0.748931	1.40155e-06	1.45644e-05
	CHRNA5	1327.91	740.582	0.573849	-0.801258	1.41592e-06	1.47021e-05
	ACTB	90782.6	65300.5	0.722239	-0.469451	1.43195e-06	1.48567e-05
	TFRC	18873.4	13327.9	0.71123	-0.491611	1.45345e-06	1.50561e-05
	TRPM6	42.3124	185.555	3.07178	1.61908	1.45337e-06	1.50561e-05
	COTL1	17855.5	12621.9	0.710829	-0.492425	1.49852e-06	1.55107e-05
	TCP11L1	288.137	632.466	2.05423	1.0386	1.50461e-06	1.55614e-05
	WDR5	7317.39	5009.3	0.68929	-0.536818	1.51093e-06	1.56146e-05
	SUOX	883.892	1518.43	1.68116	0.749453	1.53393e-06	1.58397e-05
	LOXL1	294.974	647.414	2.06109	1.04341	1.55629e-06	1.60573e-05
	ZNF654	184.44	492.323	2.35851	1.23788	1.55745e-06	1.60573e-05
	ARHGAP27	1926.6	2996.39	1.53683	0.619953	1.56976e-06	1.61716e-05
	LOC644961	4084.13	2697.27	0.667685	-0.582761	1.58989e-06	1.63662e-05
	STMN1	18381.7	13005.2	0.711596	-0.490869	1.59768e-06	1.64334e-05
	WTAP	3764.01	2457.16	0.658083	-0.603658	1.60669e-06	1.65132e-05
	INSIG2	393.895	843.632	2.01335	1.0096	1.66851e-06	1.71319e-05
	MIR17HG	1095.45	570.411	0.540649	-0.887236	1.6695e-06	1.71319e-05
	HSPA9	27075.2	18915.9	0.704172	-0.506	1.69163e-06	1.73454e-05
	IPO9	9959.65	6868.77	0.695066	-0.524779	1.71381e-06	1.75592e-05
	CDV3	11905.2	8289.52	0.701647	-0.511183	1.72124e-06	1.76114e-05
	MEPCE	5098.95	3435.93	0.679024	-0.558465	1.72159e-06	1.76114e-05
	RASSF1	2202.53	1321.24	0.610443	-0.712072	1.73457e-06	1.77304e-05
	TMC6	1676.18	2651.69	1.5667	0.647727	1.74313e-06	1.78041e-05
	RNF138	1957.71	1170.7	0.610357	-0.712276	1.75174e-06	1.78781e-05
	MYO19	8906.94	5953.75	0.673547	-0.57015	1.75385e-06	1.78858e-05
	USP7	10166.3	7085.58	0.701844	-0.510777	1.76779e-06	1.80139e-05
	POMGNT1	5703.76	8237.57	1.43422	0.520266	1.83234e-06	1.86572e-05
	GPRC5C	523.604	1018.48	1.87365	0.90585	1.83586e-06	1.86785e-05
	SLC4A11	1588.16	2524.25	1.56782	0.648756	1.83927e-06	1.86988e-05
	NAA15	7443.8	5052.61	0.68562	-0.544519	1.86288e-06	1.89241e-05
	C7orf43	962.749	1644.13	1.66715	0.737388	1.87349e-06	1.90172e-05
	FAT1	67592.2	93707.9	1.38002	0.46469	1.87665e-06	1.90284e-05
	HSPA14	3520.86	2294.81	0.657863	-0.60414	1.87749e-06	1.90284e-05
	ASS1	791.471	1416.81	1.74817	0.805843	1.88036e-06	1.90428e-05
	NEIL1	310.404	658.391	2.00095	1.00069	1.88694e-06	1.90947e-05
	KLF6	3509.72	2299.18	0.660693	-0.597947	1.89802e-06	1.91921e-05
	UCK2	6122.02	4161	0.685147	-0.545515	1.91589e-06	1.93579e-05
	SESTD1	598.379	253.475	0.464129	-1.1074	1.92144e-06	1.9399e-05
	MTHFD1	12755.3	8821.97	0.697194	-0.520369	1.95225e-06	1.9695e-05
	ETV7	30.5421	154.32	3.20174	1.67885	1.96101e-06	1.97626e-05
	SH2D3A	2610.07	3940.97	1.49436	0.579529	1.96196e-06	1.97626e-05
	CENPI	550.878	237.178	0.4657	-1.10253	1.99019e-06	2.00315e-05
	NOP14-AS1	431.055	842.819	1.87562	0.907364	2.00513e-06	2.01664e-05
	ZNF786	532.891	994.05	1.80362	0.850899	2.01046e-06	2.02046e-05
	METTL8	1418.99	2283.68	1.58222	0.66195	2.02053e-06	2.02902e-05
	U2AF1	11446.3	8032.36	0.706465	-0.50131	2.02844e-06	2.03542e-05
	MED12	1830.64	2849.6	1.53789	0.620954	2.0306e-06	2.03602e-05
	GOLIM4	760.143	1329.84	1.7093	0.773401	2.04172e-06	2.04561e-05
	USP49	629.283	1146.4	1.77399	0.826999	2.04995e-06	2.05229e-05
	C1orf112	1228.82	692.448	0.578663	-0.789205	2.0782e-06	2.07899e-05
	CYTH2	3708.94	5548.98	1.48021	0.565803	2.11788e-06	2.11707e-05
	DAPK1	226.759	533.172	2.17503	1.12103	2.14895e-06	2.1465e-05
	METTL21A	903.107	473.005	0.543728	-0.879042	2.16086e-06	2.15675e-05
	POC1A	1708.61	1006.36	0.600853	-0.734916	2.20866e-06	2.20279e-05
	HNRNPR	15460.6	10961.3	0.713127	-0.48777	2.22094e-06	2.21336e-05
	B3GNT7	243.768	561.701	2.14223	1.09911	2.2274e-06	2.21811e-05
	NUDT18	303.751	642.246	2.00088	1.00064	2.23055e-06	2.21957e-05
	GRAMD3	214.598	505.82	2.15917	1.11048	2.23391e-06	2.22123e-05
	RBL2	1010.64	1684.06	1.63873	0.712575	2.28711e-06	2.2724e-05
	PLEKHM1P	355.138	721.613	1.93373	0.951387	2.295e-06	2.27852e-05
	KRT80	983.563	509.51	0.54297	-0.881055	2.29865e-06	2.28042e-05
	CENPV	2149.6	1329.14	0.62766	-0.671945	2.30061e-06	2.28064e-05
	NFYB	1149.54	637.818	0.571035	-0.808349	2.30973e-06	2.28796e-05
	ESPN	1866.81	2891.41	1.53036	0.613872	2.31338e-06	2.28985e-05
	ZNF248	277.462	600.677	2.03362	1.02405	2.31552e-06	2.29024e-05
	CAND1	6551.65	4494.64	0.691441	-0.532322	2.31862e-06	2.29158e-05
	LRRC8C	1022.76	552.958	0.558052	-0.841529	2.36913e-06	2.33974e-05
	HNRNPU	35740.9	25697	0.722858	-0.468217	2.3733e-06	2.3421e-05
	HNRNPUL1	17693.3	12589.8	0.715588	-0.482799	2.37844e-06	2.3454e-05
	LRRCC1	772.233	379.909	0.51499	-0.957385	2.38553e-06	2.35063e-05
	THBS3	214.641	505.386	2.15536	1.10793	2.38879e-06	2.35208e-05
	THAP4	4927.13	3304.72	0.676483	-0.563875	2.42308e-06	2.38406e-05
	OSBPL2	867.729	1480.97	1.6687	0.738728	2.49429e-06	2.45228e-05
	HSD17B7	332.06	699.953	2.00849	1.00611	2.50251e-06	2.45853e-05
	TIFA	1251.66	699.825	0.575199	-0.797867	2.54308e-06	2.49651e-05
	NRBP2	946.558	1587.39	1.64547	0.718497	2.55551e-06	2.50497e-05
	THOC6	3566.16	2352.96	0.666863	-0.584538	2.55449e-06	2.50497e-05
	NUP37	2590.07	1646.27	0.64485	-0.632964	2.58052e-06	2.5276e-05
	SNN	747.984	1375.85	1.78924	0.839345	2.5836e-06	2.52873e-05
	METAP2	10802.3	7543.86	0.703586	-0.507202	2.63458e-06	2.57671e-05
	IDI1	1650.27	962.835	0.596093	-0.746392	2.68024e-06	2.61941e-05
	TLDC1	1883.96	2959.9	1.55319	0.635238	2.68345e-06	2.6206e-05
	ZAK	2607.72	1572.67	0.613123	-0.705751	2.693e-06	2.62798e-05
	EIF4G2	66687.1	48162.1	0.726197	-0.461566	2.71649e-06	2.64893e-05
	LOC101927501	4.1371	77.6827	3.62281	1.85711	2.72187e-06	2.65147e-05
	PUF60	18508.3	13106.3	0.710408	-0.493279	2.72313e-06	2.65147e-05
	LSM6	2019.19	1229.24	0.620697	-0.688039	2.73512e-06	2.6592e-05
	SLC48A1	728.574	1273.65	1.70568	0.770351	2.73427e-06	2.6592e-05
	AHSA1	15310.8	10888.4	0.7154	-0.483178	2.78834e-06	2.70894e-05
	NEU3	634.402	1141.47	1.74769	0.805445	2.81857e-06	2.73628e-05
	SCLT1	699.311	332.416	0.504034	-0.988408	2.82987e-06	2.74523e-05
	TOP3A	2790.76	1773.05	0.642127	-0.639069	2.84672e-06	2.75954e-05
	ITGB3BP	1280.54	715.816	0.573213	-0.802857	2.85164e-06	2.76226e-05
	FZD6	2336.5	3559.62	1.50799	0.592628	2.86606e-06	2.77419e-05
	E2F1	3075.47	825.2	0.353248	-1.50125	2.87392e-06	2.77975e-05
	IKBKB	1380.44	2198.26	1.5695	0.650303	2.92683e-06	2.82676e-05
	PTPLAD1	8035.78	5479.09	0.686306	-0.543076	2.92527e-06	2.82676e-05
	ARRB1	1565.6	2508.68	1.59022	0.669224	2.94636e-06	2.84353e-05
	OR51B5	2387.3	3602.61	1.49356	0.578757	2.96674e-06	2.8611e-05
	WDR24	1170.45	645.685	0.568285	-0.815314	3.03198e-06	2.92187e-05
	TMEM2	1082.69	1782.32	1.61889	0.695001	3.04678e-06	2.93398e-05
	PLP2	9258.02	6492.61	0.706048	-0.502162	3.05813e-06	2.94059e-05
	TSPAN14	4561.84	6628.42	1.44025	0.526322	3.05592e-06	2.94059e-05
	MTBP	1229.83	699.933	0.584365	-0.775059	3.07432e-06	2.954e-05
	IL12A	157.741	398.488	2.26865	1.18184	3.10729e-06	2.98302e-05
	PTPN14	1752.24	2764.86	1.55812	0.639804	3.10906e-06	2.98302e-05
	SOCS4	1600.11	2512.51	1.55145	0.633618	3.126e-06	2.99708e-05
	RNPS1	8805.47	6166.16	0.704887	-0.504536	3.15947e-06	3.02696e-05
	PABPC4	15636.7	11114.2	0.714504	-0.484987	3.19899e-06	3.06259e-05
	ZNF180	574.781	264.551	0.491489	-1.02477	3.21517e-06	3.07583e-05
	MRPL37	7726.96	5382.18	0.701586	-0.511309	3.23913e-06	3.08975e-05
	SLC2A12	39.0523	173.253	3.05378	1.6106	3.23889e-06	3.08975e-05
	SRSF8	2256.39	3416.97	1.49842	0.583441	3.23631e-06	3.08975e-05
	TINCR	71.3961	241.777	2.71681	1.44191	3.23807e-06	3.08975e-05
	NT5C3A	1348.8	783.753	0.59482	-0.749474	3.2433e-06	3.09149e-05
	ZBED2	727.851	1326.62	1.78485	0.8358	3.24708e-06	3.09285e-05
	TMEM25	776.434	1345.06	1.68843	0.755686	3.26956e-06	3.112e-05
	DHX15	16722.6	11874.2	0.714642	-0.484707	3.29768e-06	3.1365e-05
	ADCY6	1305.76	2099.68	1.58864	0.667789	3.33629e-06	3.16942e-05
	FCGBP	116.921	325.963	2.4273	1.27935	3.33712e-06	3.16942e-05
	SLC37A1	843.188	1447.23	1.67783	0.746598	3.34778e-06	3.17724e-05
	PTTG3P	579.39	263.645	0.487696	-1.03595	3.36254e-06	3.18895e-05
	DYNC1LI1	3786.44	2513.1	0.671236	-0.575109	3.39009e-06	3.21276e-05
	ELFN2	5175.2	7451.76	1.43129	0.517313	3.39633e-06	3.21515e-05
	LIN54	1033.07	563.248	0.564095	-0.825991	3.39751e-06	3.21515e-05
	ZNF623	805.041	1398.74	1.69067	0.757592	3.40965e-06	3.22432e-05
	GTF3C4	3588.41	2383.06	0.670962	-0.575697	3.44774e-06	3.25799e-05
	HCFC1	9544.54	6563.01	0.68868	-0.538094	3.54352e-06	3.34609e-05
	CSNK1G1	1532.24	2422.22	1.56012	0.641658	3.55264e-06	3.35229e-05
	MYOM3	313.176	655.644	2.00118	1.00085	3.59235e-06	3.38733e-05
	MAPK8IP3	2914.99	4337.31	1.47372	0.559458	3.61192e-06	3.40334e-05
	CHCHD3	3964.27	2627.29	0.669158	-0.579581	3.65736e-06	3.44368e-05
	TANC1	1641.16	2611.21	1.57245	0.65301	3.69154e-06	3.47338e-05
	NAE1	5166.89	3468.62	0.677822	-0.561021	3.70884e-06	3.48716e-05
	ETNK1	2260.18	3459.21	1.51083	0.59534	3.73663e-06	3.51077e-05
	EMP2	1763.41	1004.24	0.582698	-0.77918	3.79885e-06	3.56668e-05
	C15orf39	2643.69	1671.73	0.639079	-0.645934	3.84771e-06	3.60997e-05
	CST3	3177.72	4734.56	1.47239	0.558155	3.8897e-06	3.64677e-05
	CNOT10	2760.74	1740.99	0.640503	-0.642723	3.94819e-06	3.69896e-05
	C9orf69	1356.27	2152.31	1.5632	0.644501	4.01828e-06	3.76195e-05
	STIM2	2326.6	1467.3	0.640878	-0.641878	4.08279e-06	3.81962e-05
	KDELC2	1922.12	1192.46	0.630675	-0.665031	4.08671e-06	3.82056e-05
	FAM222A-AS1	305.183	632.912	1.96327	0.973256	4.18663e-06	3.91119e-05
	PFKP	22986.1	16572.8	0.725106	-0.463737	4.24716e-06	3.96492e-05
	ARL6IP6	1515.84	903.123	0.608523	-0.716617	4.33305e-06	4.04223e-05
	MESDC2	4429.98	3004.57	0.684375	-0.54714	4.34496e-06	4.05046e-05
	KDM7A	320.862	655.034	1.94031	0.956286	4.40084e-06	4.09965e-05
	FAM110C	595.407	1108.15	1.79601	0.844796	4.42754e-06	4.1216e-05
	NUPR1	4.15855	68.4621	3.52371	1.81709	4.43286e-06	4.12363e-05
	ACTG1P4	1310.56	759.45	0.594714	-0.749731	4.4395e-06	4.12396e-05
	IER5	2497.77	3779.22	1.49678	0.58186	4.43738e-06	4.12396e-05
	OSBPL6	899.964	462.37	0.538402	-0.893245	4.44304e-06	4.12433e-05
	FOXO4	449.574	888.985	1.90699	0.931299	4.57595e-06	4.24472e-05
	PCBP4	2078.1	3170.18	1.51095	0.595457	4.62565e-06	4.28778e-05
	SNRNP25	2256.41	1434.07	0.644428	-0.633909	4.63474e-06	4.29318e-05
	EI24	11376.9	15857.2	1.3859	0.470818	4.67734e-06	4.32959e-05
	CASC10	102.82	300.78	2.46933	1.30412	4.69817e-06	4.3458e-05
	PPP6R3	7657.9	5360.47	0.70511	-0.504081	4.77883e-06	4.4142e-05
	TMEM173	905.066	1526.64	1.64995	0.722423	4.77733e-06	4.4142e-05
	PLCL2	221.826	556.637	2.26607	1.18019	4.78245e-06	4.41444e-05
	VPS39	2338.11	3504.91	1.48369	0.569189	4.79424e-06	4.42221e-05
	AKT1	11876.4	8456.94	0.716553	-0.480854	4.81278e-06	4.4362e-05
	SART1	7685.6	5316.24	0.696879	-0.52102	4.84566e-06	4.46338e-05
	SYNPO	106.952	304.522	2.45298	1.29453	4.87232e-06	4.48165e-05
	TUBG2	722.244	1280.18	1.71701	0.779897	4.87197e-06	4.48165e-05
	SEPHS1	3828.26	2567.71	0.677457	-0.561799	4.95287e-06	4.55255e-05
	PAGR1	3575.57	2387.56	0.674529	-0.568047	5.01007e-06	4.60191e-05
	HEATR5B	1070.24	1750.84	1.60653	0.683952	5.02114e-06	4.60886e-05
	CFD	1510.2	2400.87	1.56956	0.650359	5.07046e-06	4.65087e-05
	CD164L2	126.077	337.02	2.34708	1.23087	5.11099e-06	4.68151e-05
	SRSF4	5237.02	3525.15	0.679879	-0.556651	5.11061e-06	4.68151e-05
	EBNA1BP2	17175.1	12152.5	0.713955	-0.486095	5.13333e-06	4.69869e-05
	DNAH1	437.22	828.952	1.82438	0.867405	5.14142e-06	4.69956e-05
	RAC3	6616.66	4414.86	0.673209	-0.570873	5.13992e-06	4.69956e-05
	BTN3A1	162.691	401.463	2.22121	1.15135	5.15704e-06	4.71056e-05
	PIP4K2A	3594.66	2322.66	0.656326	-0.607516	5.18001e-06	4.72825e-05
	NCKAP1	7681.4	5373.67	0.704515	-0.505298	5.19728e-06	4.74072e-05
	RPS6KL1	511.657	939.661	1.77875	0.830866	5.21611e-06	4.75459e-05
	CCDC138	813.461	412.886	0.527459	-0.922869	5.35357e-06	4.8765e-05
	UCA1	1715.09	2646.46	1.52058	0.604621	5.36584e-06	4.88429e-05
	HDAC2	7990.76	5469.38	0.690591	-0.534096	5.4085e-06	4.91972e-05
	RIMS3	573.38	1074.68	1.82727	0.869693	5.45647e-06	4.95992e-05
	DNMT3B	2137.79	1329.62	0.633918	-0.657631	5.47243e-06	4.96754e-05
	TRIM35	1527.42	2439.16	1.5669	0.647914	5.47113e-06	4.96754e-05
	PPP1R3B	409.74	797.981	1.86749	0.901102	5.58673e-06	5.06779e-05
	AFF1	1442.5	2259.97	1.54424	0.626892	5.66236e-06	5.13285e-05
	CEP72	1188.91	681.938	0.588884	-0.763945	5.66703e-06	5.13355e-05
	IFRD2	6285.38	4300.34	0.687515	-0.540538	5.69485e-06	5.15519e-05
	FAM58A	1324.3	776.355	0.598212	-0.741271	5.77459e-06	5.22378e-05
	ALOX12P2	383.555	755.747	1.88673	0.915885	5.90752e-06	5.34035e-05
	TRIM2	661.057	1181.13	1.7307	0.791352	5.93671e-06	5.36305e-05
	LAMC3	406.888	803.208	1.90432	0.929278	5.96442e-06	5.38437e-05
	ADCY7	1903.86	2938.8	1.53169	0.615124	6.02061e-06	5.43137e-05
	MTURN	448.707	842.544	1.80979	0.855819	6.04509e-06	5.44971e-05
	KIF26A	1669.96	961.614	0.588902	-0.7639	6.22506e-06	5.6081e-05
	CEP192	2409.38	1538.42	0.647299	-0.627495	6.23806e-06	5.61596e-05
	RPP30	2020.46	1263.81	0.636334	-0.652144	6.25898e-06	5.63094e-05
	CLTA	5386.59	3698.9	0.693429	-0.528179	6.33735e-06	5.69754e-05
	SUMO2	4641.97	3164.97	0.687933	-0.539659	6.35151e-06	5.70636e-05
	SHMT1	2642.58	1716.53	0.658032	-0.603769	6.3691e-06	5.71826e-05
	ATP2B1	3795.68	2559.25	0.681222	-0.553803	6.44815e-06	5.78528e-05
	ABCF1	11786	8416.57	0.718439	-0.477062	6.50597e-06	5.83317e-05
	GPX8	1209.32	681.837	0.580765	-0.783974	6.58797e-06	5.89244e-05
	KLHL15	1023.2	571.878	0.576105	-0.795595	6.57678e-06	5.89244e-05
	MLXIPL	1221.41	2004.06	1.63493	0.709229	6.59003e-06	5.89244e-05
	PNPT1	3344.77	2227.03	0.673768	-0.569677	6.58866e-06	5.89244e-05
	CD97	3493.68	5066.25	1.43825	0.524311	6.60166e-06	5.89883e-05
	YWHAQ	15309.3	11015.3	0.723532	-0.466871	6.63962e-06	5.92871e-05
	FAM98C	1034.44	1762.4	1.66182	0.732765	6.6972e-06	5.97607e-05
	ANKZF1	1558.01	2436.92	1.53764	0.620715	6.70313e-06	5.9773e-05
	RNF4	4302.53	2898.4	0.679522	-0.557407	6.76536e-06	6.0287e-05
	SLC5A3	1008.8	1646.04	1.60068	0.678682	6.79282e-06	6.04907e-05
	KIAA0895L	1012.48	1663.02	1.60714	0.684496	6.80597e-06	6.05257e-05
	ZNF436	443.311	838.851	1.81813	0.862456	6.80422e-06	6.05257e-05
	SCD5	859.4	1483.3	1.69575	0.761927	6.84831e-06	6.0861e-05
	TGIF1	3601.61	5466.89	1.50912	0.593705	6.8556e-06	6.08846e-05
	OSBPL7	888.956	1479.02	1.63055	0.705355	7.01955e-06	6.22985e-05
	GPN1	3678.26	2471.74	0.679179	-0.558137	7.03351e-06	6.23803e-05
	TMTC3	1063.43	1724.51	1.59228	0.671095	7.05902e-06	6.25642e-05
	PITHD1	2785.26	1828.73	0.664197	-0.590316	7.08664e-06	6.27667e-05
	ITGA2	2075.43	3192.15	1.51755	0.601742	7.10732e-06	6.28651e-05
	UBE2I	11360.5	8104.14	0.717893	-0.47816	7.10603e-06	6.28651e-05
	PSMD11	13155.2	9449.08	0.722291	-0.469348	7.13413e-06	6.30598e-05
	COLGALT1	8264.46	5745.92	0.699692	-0.515208	7.14652e-06	6.30843e-05
	LOC100288637	735.313	373.883	0.532103	-0.910222	7.14577e-06	6.30843e-05
	MPDU1	5183.11	3578.55	0.696858	-0.521063	7.25565e-06	6.40047e-05
	FAM117B	234.328	516.209	2.05686	1.04044	7.28186e-06	6.41928e-05
	ANXA5	10570.6	7517.18	0.715894	-0.482182	7.29469e-06	6.42628e-05
	MRPL46	2255.53	1448.06	0.651115	-0.619015	7.34763e-06	6.46858e-05
	BCL6	187.14	437.124	2.13301	1.09289	7.36018e-06	6.47528e-05
	ATP1B1	2606.87	1703.37	0.661123	-0.597009	7.37607e-06	6.48492e-05
	FUS	35643.8	23871.8	0.679315	-0.557848	7.41875e-06	6.51808e-05
	NICN1	209.97	472.573	2.08642	1.06103	7.42795e-06	6.5218e-05
	ZNF641	362.001	709.619	1.87005	0.903074	7.43619e-06	6.52467e-05
	NFATC2IP	4422.97	3021.45	0.689096	-0.537222	7.46178e-06	6.54276e-05
	BAG2	3569.91	2373.13	0.674325	-0.568484	7.48349e-06	6.55742e-05
	TBC1D10A	639.524	1116.21	1.69944	0.765062	7.52562e-06	6.58994e-05
	SERBP1	19149.4	13612.8	0.715161	-0.48366	7.6061e-06	6.65597e-05
	DDX24	14471	10421.9	0.724595	-0.464752	7.6518e-06	6.6915e-05
	ARHGAP11B	407.209	166.126	0.45396	-1.13936	7.6769e-06	6.70899e-05
	HNRNPA3	6605.33	4450.68	0.679925	-0.556553	7.72782e-06	6.74772e-05
	SPATA33	1185.05	621.495	0.548106	-0.867473	7.7315e-06	6.74772e-05
	NRARP	1190.07	676.794	0.586946	-0.768701	7.74238e-06	6.75274e-05
	HSPD1	45417.4	33326.8	0.737359	-0.439561	7.88952e-06	6.8765e-05
	TMEM18	2487.4	1545.06	0.631199	-0.663833	7.96314e-06	6.93607e-05
	LAS1L	5474.93	3737.08	0.689106	-0.537202	7.97841e-06	6.94476e-05
	HSD17B11	2017.77	1279.94	0.643995	-0.634878	8.01664e-06	6.97341e-05
	COPRS	2513.8	1636.8	0.659022	-0.601601	8.02405e-06	6.97525e-05
	BCL10	814.123	1363.52	1.63906	0.71287	8.125e-06	7.05833e-05
	RRP1	5332.32	3702.34	0.699508	-0.515587	8.16532e-06	7.08866e-05
	SP3	3733.3	2491.32	0.675199	-0.566616	8.20345e-06	7.11706e-05
	CROCCP3	148.238	389.508	2.2892	1.19484	8.22208e-06	7.12852e-05
	TNFSF18	13.7959	98.8154	3.27843	1.71301	8.26532e-06	7.16128e-05
	CPSF3	4629.02	3135.2	0.684127	-0.547665	8.28387e-06	7.17262e-05
	HES1	719.084	365.103	0.535232	-0.901763	8.30336e-06	7.18476e-05
	ROCK2	2880.26	1878.56	0.661271	-0.596685	8.38054e-06	7.24677e-05
	KCMF1	3799.27	2545.26	0.678342	-0.559915	8.40475e-06	7.26292e-05
	CSTF2	3982.02	2712.61	0.687618	-0.540322	8.52475e-06	7.36177e-05
	HNRNPA1	2232.2	1402.45	0.637417	-0.64969	8.55511e-06	7.38314e-05
	MEX3D	2133.3	1347.08	0.639637	-0.644674	8.61133e-06	7.42677e-05
	WHSC1L1	2403	1560.97	0.658088	-0.603647	8.69657e-06	7.49537e-05
	PSMC2	9926.54	7099.15	0.719612	-0.474709	8.70623e-06	7.49878e-05
	AGBL5	1803.24	2755.24	1.51655	0.600789	8.88928e-06	7.65142e-05
	POLD4	763.584	1390.97	1.73944	0.79862	8.97826e-06	7.72295e-05
	SIPA1L3	2625.79	3873.75	1.46277	0.548703	9.01619e-06	7.7505e-05
	NUFIP2	6448.92	4532.47	0.708004	-0.498171	9.06134e-06	7.78422e-05
	AFG3L1P	3283.29	2179.82	0.673179	-0.570939	9.11839e-06	7.82335e-05
	HMCES	4921.95	3354.22	0.688983	-0.53746	9.12104e-06	7.82335e-05
	SUV39H2	1086.7	618.697	0.586157	-0.77064	9.12475e-06	7.82335e-05
	SNRPG	3497.09	2360.79	0.681944	-0.552274	9.17422e-06	7.86063e-05
	TEAD3	1922.41	3009.42	1.54309	0.625827	9.18169e-06	7.8619e-05
	TSC1	1493.89	2307.51	1.52396	0.607822	9.19424e-06	7.86751e-05
	KIAA1109	2024.44	3071.94	1.49589	0.581002	9.20715e-06	7.87343e-05
	TLCD1	1692.81	2579.94	1.50545	0.590198	9.38855e-06	8.02333e-05
	SLC25A19	2892.76	1902.17	0.667159	-0.583898	9.40914e-06	8.0357e-05
	TSN	6271.37	4273.81	0.689539	-0.536297	9.45335e-06	8.06821e-05
	AZIN1	8172.07	5798.61	0.714667	-0.484657	9.48139e-06	8.08667e-05
	NBR1	2727.06	4155.75	1.50318	0.588016	9.48729e-06	8.08667e-05
	SLC38A5	4663.39	3217.38	0.696151	-0.522527	9.51643e-06	8.10625e-05
	MIR3189	2.2878	62.7134	3.34423	1.74167	9.66112e-06	8.22416e-05
	ELL3	672.37	1158.98	1.68238	0.750505	9.80169e-06	8.33842e-05
	CEP170B	7532.3	10531.1	1.38767	0.472659	9.8245e-06	8.35241e-05
	TMOD3	3140.42	4729.69	1.48673	0.57214	9.84597e-06	8.36525e-05
	TRAF2	1724.49	1073.63	0.633903	-0.657666	9.95809e-06	8.45505e-05
	CCDC150	1355.35	797.388	0.601842	-0.732543	1.01351e-05	8.59974e-05
	CDC123	10981.5	7713.94	0.707108	-0.499998	1.05465e-05	8.94308e-05
	FAM127B	1936.96	2911.72	1.48659	0.572002	1.05659e-05	8.95379e-05
	HELZ2	1400.16	2257.29	1.58742	0.666681	1.05789e-05	8.959e-05
	TAF3	846.529	1406.44	1.62649	0.701764	1.05899e-05	8.96248e-05
	FCHSD2	657.947	1139.66	1.68418	0.752048	1.06668e-05	9.02175e-05
	ADIRF	3652.82	5392.82	1.47136	0.557147	1.07741e-05	9.10664e-05
	RABGGTA	2130.79	3211.84	1.48858	0.573941	1.08313e-05	9.14913e-05
	GTPBP4	13540.8	9635.53	0.717448	-0.479053	1.09052e-05	9.20564e-05
	TPM3	11848.2	8472.88	0.720054	-0.473822	1.0913e-05	9.20631e-05
	MOB3C	253.229	538.185	1.99692	0.997776	1.09994e-05	9.27234e-05
	TYRO3	2712.77	1745.45	0.653413	-0.613932	1.10054e-05	9.27234e-05
	RNF43	2568.11	3776.98	1.45635	0.542357	1.11752e-05	9.40934e-05
	BRI3BP	2724.05	1752.68	0.648846	-0.624053	1.12164e-05	9.43801e-05
	MAD2L2	3569.5	2418.62	0.684173	-0.547567	1.13244e-05	9.52279e-05
	RPN1	24030	17614.3	0.736653	-0.440943	1.15872e-05	9.73756e-05
	MMP24-AS1	1582.93	2428.95	1.51323	0.597629	1.16146e-05	9.75434e-05
	TIMM23	2820.69	1857.31	0.66791	-0.582274	1.16503e-05	9.77805e-05
	AURKAPS1	333.163	128.521	0.439302	-1.18672	1.17141e-05	9.82533e-05
	MAVS	7005.27	9782.47	1.3891	0.474147	1.19487e-05	0.000100157
	MAP3K4	2345.1	1521.91	0.658426	-0.602908	1.19758e-05	0.000100269
	NSD1	6176.18	8674.6	1.39448	0.479728	1.19773e-05	0.000100269
	PRICKLE3	811.75	1358	1.63516	0.709436	1.25351e-05	0.000104871
	MGC57346	782.742	1314.98	1.64339	0.716679	1.25845e-05	0.000105218
	GRAMD2	322.706	652.567	1.93306	0.950884	1.28328e-05	0.000107226
	CUL3	5432.19	3804.67	0.705971	-0.502319	1.28817e-05	0.000107566
	PHF21A	915.22	1488.51	1.59975	0.677848	1.30283e-05	0.000108721
	CDK18	578.912	1125.28	1.92903	0.947879	1.30556e-05	0.00010888
	GBA2	2561.18	3746.98	1.44884	0.534898	1.3408e-05	0.000111748
	RASGEF1A	1405.66	2168.31	1.52122	0.605233	1.35676e-05	0.000113006
	BMPR2	585.186	1025.01	1.69902	0.7647	1.36722e-05	0.000113677
	DRG1	4490.29	3100.72	0.697081	-0.520602	1.36741e-05	0.000113677
	TMEM63C	380.457	766.943	1.9401	0.956132	1.36681e-05	0.000113677
	RAN	25627.1	18651.9	0.733281	-0.447562	1.38243e-05	0.000114853
	PRMT2	2938.47	4317.53	1.45798	0.543969	1.38384e-05	0.000114897
	CCDC59	2425.64	1560.2	0.651485	-0.618196	1.38683e-05	0.000115073
	AGPAT9	2660.84	1749.87	0.666792	-0.584692	1.38825e-05	0.000115118
	TRIM66	1390.9	2161.85	1.53158	0.615019	1.38991e-05	0.000115183
	MRPL20	5249.64	3652.94	0.701894	-0.510676	1.39108e-05	0.000115207
	RNF215	880.422	1443.68	1.61231	0.689133	1.39269e-05	0.000115268
	PHLPP2	1213.82	697.327	0.588985	-0.763697	1.41075e-05	0.000116689
	MOGS	4285.56	6078.46	1.40778	0.493426	1.41311e-05	0.00011681
	CAPS	9.46101	82.475	3.25348	1.70198	1.41481e-05	0.000116878
	DUSP16	473.877	860.696	1.75454	0.811089	1.41836e-05	0.000117097
	FLJ20021	358.303	690.744	1.84093	0.880438	1.43144e-05	0.000118102
	MXI1	1461.79	2240.95	1.51492	0.599238	1.45408e-05	0.000119896
	HEMK1	1164.83	1880.45	1.58226	0.661985	1.46549e-05	0.000120761
	FAM72B	233.818	74.9146	0.396602	-1.33424	1.47782e-05	0.0001217
	SEMA4B	1766.46	2682.84	1.49929	0.58428	1.48065e-05	0.000121857
	KARS	16430.5	11920.3	0.730502	-0.45304	1.48441e-05	0.00012209
	TXNDC12	4895.75	3418.03	0.70347	-0.50744	1.49346e-05	0.000122757
	ATF5	2024.02	1250.66	0.62538	-0.677194	1.51131e-05	0.000124147
	MYO7A	83.6096	251.181	2.46538	1.30181	1.52041e-05	0.000124816
	MGST2	369.763	708.084	1.83262	0.873905	1.52212e-05	0.000124879
	SLC26A11	567.782	1010.07	1.73145	0.791977	1.53044e-05	0.000125482
	DNAJB11	8509.41	6099.54	0.720946	-0.472037	1.53509e-05	0.000125786
	NDST2	669.713	1144.46	1.66662	0.736926	1.54129e-05	0.000126215
	U2SURP	7628.96	5223.03	0.691787	-0.5316	1.54235e-05	0.000126223
	SLIRP	6284.96	4454.61	0.71383	-0.486349	1.54851e-05	0.000126648
	ARID5B	176.492	408.978	2.1084	1.07615	1.5694e-05	0.000128209
	PLSCR1	1039.46	595.866	0.590515	-0.759955	1.56955e-05	0.000128209
	SEPT7	4252.7	2918.27	0.692308	-0.530514	1.57628e-05	0.000128679
	PABPC1L	1871	2864.99	1.50602	0.590739	1.60466e-05	0.000130915
	C19orf48	12620.7	9185.43	0.731538	-0.450995	1.61586e-05	0.000131746
	SNHG15	2263.63	1457.87	0.654821	-0.610828	1.61849e-05	0.000131878
	LOC642852	1287.3	1997.81	1.53075	0.61424	1.62342e-05	0.000132198
	SEH1L	4104.29	2834.48	0.697027	-0.520714	1.63291e-05	0.000132889
	MPHOSPH10	3031.49	2027.71	0.677791	-0.561087	1.6584e-05	0.00013488
	ING4	237.192	505.254	1.98328	0.987885	1.66233e-05	0.000135115
	YPEL3	48.8278	187.266	2.74791	1.45833	1.66964e-05	0.000135626
	FAM168B	11037	7924.9	0.721328	-0.471273	1.67516e-05	0.00013599
	CUEDC1	3038.22	4499.13	1.46677	0.552643	1.68512e-05	0.000136714
	SZT2	2358.26	3459.52	1.45292	0.538957	1.68681e-05	0.000136767
	NPAS1	46.204	187.466	2.82208	1.49676	1.6924e-05	0.000137136
	GLI2	587.736	276.596	0.507225	-0.979303	1.72747e-05	0.000139891
	ARRDC4	694.795	1320.1	1.85329	0.890086	1.7294e-05	0.000139961
	MRFAP1	19646.3	14412.8	0.737363	-0.439554	1.7496e-05	0.000141422
	PTK7	7770.45	10748.8	1.37413	0.458516	1.74934e-05	0.000141422
	CBLC	1582.14	2397.23	1.49638	0.58148	1.75368e-05	0.000141664
	MRPL12	13211.3	9627.33	0.7324	-0.449296	1.76427e-05	0.000142432
	OIP5	906.167	504.85	0.576478	-0.794662	1.76571e-05	0.000142461
	IL18	1126.59	1812.05	1.56737	0.648343	1.76946e-05	0.000142676
	CHD7	3678.85	2503.96	0.687629	-0.540299	1.77163e-05	0.000142763
	PKNOX1	1206.37	716.228	0.608975	-0.715546	1.77699e-05	0.000143107
	PRKRIR	1793.87	1131.5	0.641268	-0.641	1.78848e-05	0.000143944
	SLC6A6	3994.55	5822.77	1.44685	0.532914	1.79064e-05	0.00014403
	RAVER1	6183.74	4247.2	0.690739	-0.533786	1.7923e-05	0.000144075
	RIF1	3592.27	2450.65	0.688465	-0.538544	1.7935e-05	0.000144083
	PRIMPOL	521.02	247.312	0.507366	-0.978903	1.79803e-05	0.000144359
	SH3BP1	3491.15	2236.38	0.654718	-0.611055	1.80298e-05	0.000144668
	BAHCC1	2866.22	1801.4	0.642641	-0.637915	1.80935e-05	0.00014509
	LOC100129550	122.245	319.598	2.29276	1.19708	1.82502e-05	0.000146169
	YY1	5711.58	4037.28	0.712267	-0.48951	1.8242e-05	0.000146169
	ANO9	1351.03	2211.02	1.59629	0.674725	1.82687e-05	0.000146227
	NIPSNAP1	2709.32	3920.55	1.43438	0.520431	1.8305e-05	0.000146429
	ATG2B	382.735	755.748	1.86612	0.900044	1.85834e-05	0.000148565
	MEA1	4514.32	3101.71	0.694947	-0.525025	1.86327e-05	0.000148869
	RAC1	5493.71	3840.33	0.705517	-0.503247	1.86483e-05	0.000148903
	ANKRD13A	2977.89	1957.73	0.669841	-0.578109	1.87152e-05	0.000149346
	CASP2	2554.85	1647.96	0.655714	-0.608862	1.87326e-05	0.000149394
	STARD8	627.718	284.903	0.492507	-1.02178	1.87856e-05	0.000149726
	RAD1	1413.79	867.397	0.625533	-0.676841	1.88838e-05	0.000150417
	HSDL2	1875.2	2802.99	1.47551	0.561214	1.89342e-05	0.000150728
	DCBLD2	27451.4	37304.2	1.35219	0.435297	1.90498e-05	0.000151556
	ZFP36L2	2466.35	1574.77	0.647185	-0.62775	1.94428e-05	0.000154589
	ZDHHC6	6584.28	4646.63	0.712107	-0.489834	1.95868e-05	0.00015564
	ICT1	4098.18	2831.12	0.69695	-0.520872	1.96606e-05	0.000156132
	REPS1	2917.89	1924.15	0.666857	-0.584551	1.9992e-05	0.000158667
	STK24	6943.05	4927.14	0.714842	-0.484304	2.02492e-05	0.000160612
	TEX19	168.79	43.0144	0.361299	-1.46873	2.02727e-05	0.000160701
	MRPS15	7042.51	5042.52	0.720829	-0.472272	2.03433e-05	0.000161163
	DDX21	21636	15635.1	0.727616	-0.45875	2.07544e-05	0.000164322
	SMAD5	2534.47	3741.46	1.45732	0.543313	2.07742e-05	0.000164379
	LYRM9	74.2773	240.028	2.57392	1.36397	2.08367e-05	0.000164775
	NUP88	5713.37	4024.74	0.709753	-0.494611	2.10629e-05	0.000166463
	FUCA2	5054.22	3531.96	0.704915	-0.504479	2.11596e-05	0.000167126
	ARHGEF2	2013.69	2982.66	1.46537	0.551263	2.11873e-05	0.000167131
	BCL2L1	11779.6	16116.7	1.36251	0.44627	2.11737e-05	0.000167131
	VIPAS39	949.711	1549.43	1.59925	0.6774	2.11983e-05	0.000167131
	PTK2B	513.647	949.207	1.79269	0.842123	2.13137e-05	0.00016794
	PPIL1	3422.83	2322.04	0.686946	-0.541732	2.13416e-05	0.000167999
	SDC3	2224.63	3334.56	1.49198	0.577226	2.13524e-05	0.000167999
	TMED2	13853.7	10135.7	0.735692	-0.442826	2.13597e-05	0.000167999
	GPR124	317.201	628.083	1.90131	0.926991	2.15492e-05	0.00016932
	TCHP	1720.63	1077.02	0.637775	-0.648881	2.15534e-05	0.00016932
	PDS5A	10625.7	7719.76	0.73031	-0.45342	2.15998e-05	0.000169583
	SLC38A2	18327.1	24731.3	1.3433	0.425782	2.2279e-05	0.000174811
	SIVA1	3569.87	2388.06	0.66893	-0.580073	2.25283e-05	0.000176662
	TMEM38B	2135.64	1376.64	0.654414	-0.611724	2.27372e-05	0.000178194
	POLR1E	5307.36	3739	0.709689	-0.494741	2.27518e-05	0.000178202
	GABPB1	1192.97	714.763	0.613535	-0.704783	2.32047e-05	0.000181641
	ABCC3	529.9	972.501	1.74615	0.80418	2.32522e-05	0.000181905
	ATL2	3114.75	2082.6	0.678247	-0.560118	2.33235e-05	0.000182354
	FAM127A	1288.83	2034.09	1.55115	0.633336	2.33662e-05	0.000182579
	SERINC5	1292.59	1989.87	1.51757	0.601764	2.3444e-05	0.000183078
	ABLIM1	7422.17	10488.8	1.39935	0.484752	2.37138e-05	0.000185019
	CRIM1	3328.45	4852.05	1.45284	0.538879	2.37208e-05	0.000185019
	CTNNBIP1	724.284	1213.31	1.64426	0.717441	2.38285e-05	0.000185749
	WDR53	716.932	371.787	0.544529	-0.87692	2.39124e-05	0.000186293
	CRABP2	6442.38	4507.37	0.710234	-0.493633	2.41049e-05	0.00018757
	PAICS	18489.1	13626.5	0.740493	-0.433441	2.4092e-05	0.00018757
	RPF2	3040.92	2034.7	0.677427	-0.561862	2.42906e-05	0.000188903
	FAM92A1	4081.1	2842.52	0.701996	-0.510465	2.43595e-05	0.000189327
	PTPN6	1398.82	2138.12	1.51053	0.595057	2.44421e-05	0.000189856
	SMPDL3B	733.454	1235.34	1.6441	0.717295	2.45156e-05	0.000190223
	TBC1D8B	338.456	663.764	1.85334	0.890127	2.45183e-05	0.000190223
	APPBP2	1561.15	2353.7	1.48881	0.574163	2.46537e-05	0.000191161
	C1orf21	524.714	252.085	0.513901	-0.960438	2.48236e-05	0.000192365
	RUSC1	4292.91	2927.01	0.68703	-0.541556	2.4939e-05	0.000193145
	GJA3	572.861	1013.83	1.72463	0.786285	2.57966e-05	0.000199669
	APOBEC3F	148.168	357.468	2.15206	1.10572	2.59814e-05	0.000200932
	CRHR1-IT1	151.45	360.656	2.13756	1.09597	2.60057e-05	0.000200932
	NOL11	8128.23	5620.97	0.699192	-0.51624	2.59954e-05	0.000200932
	DHX9	22197.9	16356.4	0.741446	-0.431587	2.659e-05	0.000205326
	ZNF639	2074.68	1343.37	0.656948	-0.606148	2.66996e-05	0.000206051
	SH3BP4	4753.55	3304.05	0.703317	-0.507754	2.68272e-05	0.000206914
	EIF5B	13935.5	9782.56	0.706783	-0.50066	2.70488e-05	0.000208501
	ERAP2	80.7593	240.291	2.43452	1.28364	2.71222e-05	0.000208944
	MISP	3066.5	2066.99	0.684547	-0.546779	2.7168e-05	0.000209174
	C9orf40	551.515	273.338	0.525987	-0.926901	2.76779e-05	0.000212976
	DNAJC8	6302.9	4513.81	0.72116	-0.471609	2.79574e-05	0.000214877
	UCHL5	3223.91	2039.11	0.645371	-0.6318	2.79577e-05	0.000214877
	BLACAT1	82.1344	238.84	2.41251	1.27053	2.80356e-05	0.000215349
	VAMP8	1505.36	2287.68	1.49899	0.583989	2.81158e-05	0.000215839
	WRAP73	3218.31	4581.38	1.41054	0.49625	2.8367e-05	0.00021764
	NXT1	2069.63	1356.81	0.664364	-0.589955	2.84234e-05	0.000217946
	RHOC	7040.88	9771.34	1.37857	0.463175	2.84506e-05	0.000218027
	CHD4	25376	18856.6	0.746885	-0.421042	2.85338e-05	0.000218537
	C14orf28	79.6107	255.055	2.50611	1.32545	2.86062e-05	0.000218964
	SON	17783.4	13156.2	0.743748	-0.427114	2.8651e-05	0.000219179
	PTCH1	369.742	697.505	1.80556	0.852444	2.86866e-05	0.000219324
	COL27A1	836.668	1364.65	1.59609	0.674545	2.88305e-05	0.000220296
	PLEKHM3	361.372	681.889	1.81075	0.856584	2.89138e-05	0.000220804
	LOC150776	2172.29	1433.04	0.668297	-0.58144	2.89799e-05	0.00022118
	WIPI1	416.544	765.188	1.76262	0.817718	2.91065e-05	0.000221888
	ZFP62	986.249	1562.53	1.55572	0.637581	2.91024e-05	0.000221888
	LOC728392	4.51125	66.9274	3.14665	1.65382	2.91704e-05	0.000222247
	GLOD4	4479.35	3152.2	0.709251	-0.495632	2.92055e-05	0.000222385
	KIAA0020	4376.13	3044.32	0.702251	-0.509942	2.93679e-05	0.000223362
	PARPBP	1146.47	685.379	0.61278	-0.70656	2.93651e-05	0.000223362
	ARHGEF17	1480.55	2318.16	1.54621	0.628739	2.93994e-05	0.000223473
	TRIM46	179.192	404.728	2.05864	1.04169	2.95864e-05	0.000224764
	WSB1	1986.16	3012.37	1.5015	0.586402	2.96583e-05	0.00022518
	SGTA	9731.12	6958.66	0.717373	-0.479204	3.01342e-05	0.000228661
	GMIP	790.371	1306.77	1.61987	0.695874	3.0569e-05	0.000231827
	BTBD2	2510.61	3715	1.47531	0.561021	3.07364e-05	0.000232962
	ANKRD28	2685.63	1796.01	0.678241	-0.560129	3.07558e-05	0.000232974
	BTN2A2	470.574	838.701	1.72668	0.788004	3.09128e-05	0.000234029
	SMIM15	3920.51	2737.12	0.704207	-0.505929	3.10082e-05	0.000234615
	GRPEL1	7977.26	5783.19	0.729467	-0.455085	3.11084e-05	0.000235238
	TECPR1	922.343	1469.89	1.5661	0.647174	3.12463e-05	0.000236145
	ZNF513	451.988	841.239	1.78324	0.834502	3.13429e-05	0.000236739
	ERO1LB	182.955	408.891	2.04427	1.03158	3.15356e-05	0.000238057
	KIF5B	10567.9	7709.27	0.734103	-0.445945	3.19324e-05	0.000240914
	ENGASE	2146.36	3125.28	1.44265	0.528717	3.21435e-05	0.000242368
	CDC27	4898.43	3460.61	0.711851	-0.490353	3.24342e-05	0.000244419
	CEL	31.462	136.956	2.83027	1.50094	3.24867e-05	0.000244674
	OXCT1	4146.86	2908.33	0.707291	-0.499624	3.26418e-05	0.000245702
	SLC43A2	1094.96	1773.84	1.58859	0.667743	3.27563e-05	0.000246423
	RNF123	2283.91	3325.21	1.44533	0.5314	3.28412e-05	0.00024692
	EVPL	4946.42	6990.47	1.4022	0.487697	3.29727e-05	0.000247767
	ITPKA	602.328	308.346	0.540706	-0.887084	3.31161e-05	0.000248702
	H19	192.936	428.848	2.05796	1.04122	3.35351e-05	0.000251705
	ACVR2B	878.777	1416.34	1.57833	0.658398	3.36585e-05	0.000252198
	MAP1B	482.681	867.568	1.73708	0.796665	3.36459e-05	0.000252198
	PISD	3063.25	4360.61	1.4138	0.499579	3.36274e-05	0.000252198
	TIMM50	5824.49	4170.26	0.720971	-0.471988	3.36874e-05	0.000252271
	TAF5L	2484.87	1618.61	0.660746	-0.597833	3.38502e-05	0.000253202
	TNFRSF10D	5612.08	7745.25	1.37191	0.456186	3.38384e-05	0.000253202
	MRAS	562.892	974.813	1.69141	0.758225	3.40163e-05	0.000254299
	H3F3C	1622.77	1023.49	0.643168	-0.636732	3.42044e-05	0.00025556
	G6PC3	2287.01	3339.22	1.44738	0.533448	3.42246e-05	0.000255566
	PSME3	15670.1	11535.2	0.741025	-0.432407	3.44785e-05	0.000257315
	PAFAH1B1	7606.53	5516.84	0.729831	-0.454365	3.47476e-05	0.000259177
	GAL	3421.38	2370.55	0.698398	-0.517879	3.5289e-05	0.000263065
	UTP18	6869.64	4914.69	0.720311	-0.473308	3.53956e-05	0.000263711
	RNMTL1	4134.59	2903.25	0.707459	-0.499282	3.54957e-05	0.000264306
	WDR82	10736.2	7874.72	0.737427	-0.439428	3.55412e-05	0.000264495
	DDX1	10174.6	7385.09	0.730298	-0.453443	3.57008e-05	0.000265532
	AP1G2	3191.67	4629.94	1.43371	0.519758	3.62397e-05	0.000269388
	RAE1	5420.37	3867.96	0.719203	-0.475528	3.64418e-05	0.000270737
	TRIM21	533.875	928.463	1.6842	0.752065	3.649e-05	0.000270942
	HOXB6	1690.45	2506.82	1.46577	0.551656	3.70388e-05	0.000274861
	PURB	1448.18	2186.21	1.49065	0.575942	3.71421e-05	0.000275472
	BCCIP	9314.77	6693.12	0.724479	-0.464984	3.71749e-05	0.00027556
	SF3B3	16517.9	12219.9	0.744093	-0.426445	3.72882e-05	0.000276244
	PIK3C3	750.856	1287.25	1.65865	0.730012	3.74033e-05	0.00027694
	THRAP3	14606.9	10815.6	0.744339	-0.425969	3.74268e-05	0.000276958
	SEC61A1	19326.7	26259.8	1.34862	0.431484	3.74489e-05	0.000276965
	PINK1	774.868	1265.15	1.59828	0.676521	3.76591e-05	0.000278363
	GABPB1-AS1	781.508	1275.51	1.594	0.672654	3.77394e-05	0.000278801
	LINC00294	138.445	333.673	2.14722	1.10247	3.78307e-05	0.000279318
	TRMT6	1993.89	1310.18	0.666499	-0.585326	3.83207e-05	0.000282685
	UMPS	4426.55	3059.16	0.700131	-0.514304	3.83298e-05	0.000282685
	RPS19BP1	5385.82	3841.62	0.718829	-0.47628	3.85264e-05	0.000283976
	MRPL3	10903.2	7923.08	0.730431	-0.45318	3.88911e-05	0.000286503
	APOBEC3D	63.5222	201.021	2.49541	1.31927	3.91613e-05	0.000288331
	ARF1	21775.8	16247.8	0.749222	-0.416536	3.94101e-05	0.000290001
	ABCE1	4110.35	2784.82	0.686112	-0.543484	3.94854e-05	0.00029023
	SPRY4	3282.65	4822.55	1.47221	0.557986	3.94683e-05	0.00029023
	SFR1	874.433	474.289	0.568373	-0.815091	3.95869e-05	0.000290813
	FBXO2	2364.28	3406.17	1.42794	0.51393	3.98141e-05	0.000292319
	TMEM51	1222.7	738.079	0.619535	-0.690742	3.98891e-05	0.000292706
	GNL3	14501.7	10537.6	0.730458	-0.453127	3.9949e-05	0.000292981
	TRIP6	6298.46	8632.83	1.36149	0.445191	4.12305e-05	0.000302211
	EXOSC10	7880.7	5733.97	0.732234	-0.449623	4.16188e-05	0.000304887
	CCDC85C	3426.81	2370.16	0.697168	-0.520422	4.19521e-05	0.000307158
	GUCD1	2924.38	1990.14	0.68699	-0.54164	4.20579e-05	0.000307705
	SLC25A28	2973.18	1950.65	0.660278	-0.598855	4.20737e-05	0.000307705
	MST1P2	226.132	476.069	1.95364	0.966164	4.21185e-05	0.000307861
	HEATR2	5785.57	4117.43	0.716952	-0.480052	4.2149e-05	0.000307864
	TPD52L2	13199.5	9525.58	0.727546	-0.458889	4.21657e-05	0.000307864
	RPP25	318.019	125.005	0.454064	-1.13903	4.22345e-05	0.000308195
	MZF1	1023.25	1598.51	1.53585	0.619033	4.24115e-05	0.000309314
	CENPK	544.599	269.326	0.523436	-0.933915	4.24715e-05	0.00030958
	FEM1C	1507.56	954.484	0.644951	-0.632739	4.25524e-05	0.000309998
	ARHGAP23	2632.41	3757.25	1.4148	0.5006	4.26566e-05	0.000310584
	PAF1	4637.53	3294.21	0.715802	-0.482368	4.29058e-05	0.000312226
	EIF4G1	52699.4	39097.7	0.743764	-0.427084	4.31011e-05	0.000313473
	GPC2	245.788	508.863	1.94739	0.96154	4.31285e-05	0.000313499
	CST6	3094.09	4369.28	1.40092	0.486371	4.32234e-05	0.000314015
	MAPRE1	10855.2	7889.51	0.732055	-0.449977	4.36118e-05	0.000316486
	TMEM150A	227.4	477.937	1.95872	0.969908	4.36116e-05	0.000316486
	PPP6C	2928.06	2002.7	0.691565	-0.532064	4.38385e-05	0.00031778
	SARS	7752.02	10643.2	1.36338	0.447184	4.3825e-05	0.00031778
	AJUBA	3011.56	4361.38	1.42537	0.511335	4.39404e-05	0.000318169
	KIAA1324L	679.939	1124.26	1.61592	0.692355	4.39253e-05	0.000318169
	SMTNL2	84.1172	239.751	2.36576	1.2423	4.4419e-05	0.000321457
	HTATSF1	4977.48	3506.7	0.711698	-0.490663	4.4568e-05	0.000322357
	ST6GAL1	674.649	1115.9	1.61582	0.692266	4.4911e-05	0.000324659
	ELF4	2554.25	1724.33	0.682754	-0.550563	4.52358e-05	0.000326828
	NOL10	4262.05	3006.53	0.711193	-0.491686	4.56e-05	0.000329278
	HMGB1	6954.77	4989.2	0.721226	-0.471477	4.57724e-05	0.000330341
	PJA2	1440.55	2161.24	1.4801	0.565697	4.62629e-05	0.000333698
	THUMPD3	4057.55	2816.18	0.701337	-0.51182	4.64227e-05	0.000334667
	PPIG	3929.21	2662.18	0.682703	-0.55067	4.67744e-05	0.000337017
	PIK3R2	4864.35	6766.88	1.38193	0.466685	4.72819e-05	0.000340487
	BTBD1	6200.14	4293.55	0.699398	-0.515814	4.73812e-05	0.000341015
	DQX1	22.3537	115.476	2.89654	1.53433	4.76463e-05	0.000342547
	UBQLN1	12673.5	9366.9	0.743241	-0.428098	4.76421e-05	0.000342547
	DDX12P	1483.21	938.526	0.644336	-0.634115	4.77416e-05	0.000343045
	VWA1	3311.86	2291.1	0.696306	-0.522207	4.78729e-05	0.0003438
	ERCC6	437.351	816.342	1.78016	0.832005	4.79419e-05	0.000344108
	DNHD1	314.932	618.511	1.84475	0.883426	4.83662e-05	0.000346964
	SIK1	2281.06	1460.85	0.647189	-0.627742	4.88651e-05	0.00035016
	ZNF500	592.726	1020.86	1.66902	0.738999	4.88424e-05	0.00035016
	SMARCA5	7931.7	5788.27	0.73401	-0.446128	4.89917e-05	0.000350876
	CAPN1	14588.7	19713.7	1.34305	0.425517	4.90696e-05	0.000351051
	SLC52A3	390.587	717.467	1.75874	0.814543	4.9056e-05	0.000351051
	CCDC120	419.275	754.47	1.73242	0.792787	4.91951e-05	0.000351757
	GJB4	22.8399	113.281	2.85928	1.51565	4.94256e-05	0.000353213
	COPZ1	13417.5	9863.08	0.738519	-0.437293	4.94725e-05	0.000353356
	SMEK1	3322.77	4730.84	1.41235	0.498094	5.00082e-05	0.000356988
	SRSF9	10659.8	7867.5	0.742288	-0.429948	5.08263e-05	0.000362631
	PFDN2	7256.49	5290.95	0.733708	-0.446723	5.12703e-05	0.0003656
	ZFP41	715.402	1179.95	1.608	0.685265	5.14908e-05	0.000366973
	FAM8A1	756.168	1228.73	1.5965	0.674914	5.16375e-05	0.000367819
	BMP7	483.786	846.789	1.69127	0.758109	5.24573e-05	0.000373456
	ERH	8597.61	6236.74	0.731992	-0.450101	5.25948e-05	0.000374033
	GLA	2863.98	1971.08	0.695375	-0.524137	5.25953e-05	0.000374033
	MAGOH	3769.83	2596.7	0.698571	-0.517522	5.27205e-05	0.000374518
	PPAP2C	5755.34	4017.54	0.700128	-0.51431	5.27115e-05	0.000374518
	NETO2	1128.02	684.454	0.621308	-0.68662	5.28382e-05	0.000375152
	FOXK1	2998.26	4248.02	1.4046	0.490158	5.29325e-05	0.000375618
	DNAJC2	4094.26	2875.57	0.709076	-0.495988	5.30208e-05	0.000376041
	AURKAIP1	7519.57	5494.32	0.735192	-0.443807	5.33522e-05	0.000378187
	ACP6	530.438	921.258	1.67809	0.746817	5.34918e-05	0.000378973
	PIK3CD	498.767	928.86	1.80331	0.850647	5.4445e-05	0.000385518
	HPX	31.2428	131.484	2.74529	1.45696	5.46238e-05	0.000386575
	OBFC1	1582.36	2345.77	1.46633	0.552207	5.46815e-05	0.000386775
	DVL1	11965.4	8780.46	0.73671	-0.440832	5.49969e-05	0.000388796
	ABCD4	1119.71	1720.73	1.51356	0.597945	5.57578e-05	0.000393964
	BAZ2B	519.876	896.627	1.67061	0.740379	5.60861e-05	0.000396071
	BBS9	168.122	375.695	2.03811	1.02723	5.62501e-05	0.000397015
	MTERFD1	2312.9	1550.19	0.678069	-0.560495	5.63956e-05	0.000397828
	ZNF33B	906.102	1434.18	1.55155	0.633708	5.66933e-05	0.000399714
	C16orf58	2568.97	3703.54	1.43425	0.520299	5.67531e-05	0.000399921
	RANGAP1	14140.3	10539.8	0.748758	-0.417428	5.68155e-05	0.000400146
	ZKSCAN3	304.306	583.942	1.82103	0.864754	5.72669e-05	0.000403109
	PMP22	2482.16	1681.6	0.685588	-0.544586	5.77576e-05	0.000406128
	UNC93B1	1859.4	2867.06	1.51273	0.597157	5.7754e-05	0.000406128
	PPP1R8	3744.86	2610.79	0.703942	-0.506472	5.8267e-05	0.000409331
	ZDBF2	465.298	816.342	1.695	0.761285	5.82756e-05	0.000409331
	RFX2	867.37	478.905	0.577898	-0.791114	5.84051e-05	0.000410022
	IL10RB	653.849	1084.7	1.61907	0.695162	5.84624e-05	0.000410205
	SF3A2	10382.1	7630.66	0.739013	-0.436329	5.93219e-05	0.000416014
	MERTK	376.36	687.494	1.7537	0.810398	5.94697e-05	0.000416828
	TMEM200B	938.732	533.687	0.590753	-0.759373	6.03119e-05	0.000422483
	ZSCAN9	492.225	863.575	1.69412	0.760532	6.03409e-05	0.000422483
	GLIPR2	581.063	981.304	1.64018	0.713858	6.04381e-05	0.000422938
	FASTKD2	3919.32	2729.56	0.704555	-0.505216	6.09461e-05	0.000426266
	BAI1	64.8639	199.165	2.4378	1.28558	6.12115e-05	0.000427894
	ZNF473	1258.36	755.217	0.616088	-0.698792	6.12661e-05	0.000428048
	ABCB9	590.922	1099.13	1.78391	0.835044	6.14329e-05	0.000428985
	RHOBTB2	885	498.786	0.583121	-0.778134	6.1641e-05	0.00043021
	RNF138P1	450.666	213.53	0.512408	-0.964635	6.18068e-05	0.000431138
	HCFC1R1	2607.29	1778.65	0.691356	-0.532499	6.23222e-05	0.000434502
	CLSTN3	1319.1	1983.31	1.48363	0.569131	6.3489e-05	0.000442402
	MAP3K5	1277.54	778.78	0.623917	-0.680574	6.37394e-05	0.000443912
	FAM168A	2523.05	3606.15	1.41881	0.504681	6.39971e-05	0.000445303
	ZNF695	282.193	111.231	0.454385	-1.13801	6.4007e-05	0.000445303
	TDP1	1656.67	1077.6	0.660876	-0.597549	6.45096e-05	0.000448562
	MSANTD4	978.699	1536.45	1.54007	0.622996	6.47299e-05	0.000449856
	NFKBIB	4043.29	2851.38	0.709294	-0.495544	6.48976e-05	0.000450783
	BTG1	827.666	1329.93	1.57139	0.652039	6.5506e-05	0.000454768
	ING3	820.963	469.458	0.591942	-0.756472	6.62145e-05	0.000459444
	ZBED6	504.898	900.66	1.71184	0.77555	6.70494e-05	0.000464992
	SIAH1	834.018	471.923	0.586222	-0.770481	6.71381e-05	0.000465361
	ISOC1	2769.03	1880.52	0.688134	-0.539238	6.7632e-05	0.00046829
	ZC3H15	5814.29	4118.59	0.713408	-0.487201	6.76297e-05	0.00046829
	PPAPDC2	261.422	517.744	1.86244	0.897196	6.81598e-05	0.000471696
	C22orf46	889.027	1401.33	1.55152	0.63368	6.84159e-05	0.00047297
	DCAF16	2630	1797.96	0.691133	-0.532965	6.83983e-05	0.00047297
	KLHL21	5660.62	3944.71	0.696738	-0.521312	6.85013e-05	0.000473311
	RB1CC1	1083.6	1770.02	1.5893	0.668396	6.85415e-05	0.00047334
	MRPS18C	2068.27	1368.04	0.671156	-0.575279	6.86618e-05	0.000473922
	R3HDM2	1195.67	1811.36	1.49448	0.579645	6.89869e-05	0.000475916
	SURF2	2832.19	1890.14	0.674124	-0.568914	6.91199e-05	0.000476583
	ANKS6	2592.16	3764.8	1.44367	0.529739	6.98662e-05	0.000481476
	TMX1	3663.15	2528.9	0.699082	-0.516467	6.99096e-05	0.000481522
	POLR3K	1415.08	900.418	0.648655	-0.624477	7.05541e-05	0.000485707
	HCCS	2555.59	1728.69	0.685522	-0.544726	7.15002e-05	0.000491962
	CTPS1	9881.05	7301.71	0.743662	-0.427281	7.28294e-05	0.000500321
	HGSNAT	447.851	785.56	1.6952	0.761458	7.28229e-05	0.000500321
	NTN5	22.1988	109.25	2.82171	1.49657	7.27898e-05	0.000500321
	RBBP4	6607.16	4827.78	0.735154	-0.443882	7.29068e-05	0.000500591
	CCDC78	202.725	478.977	2.08855	1.0625	7.29697e-05	0.000500761
	NGDN	3553.55	2424.02	0.692406	-0.530311	7.45056e-05	0.000511034
	ITPRIPL1	944.649	555.114	0.603184	-0.72933	7.53864e-05	0.000516806
	SNRPA	6587.34	4818.94	0.73623	-0.441772	7.56567e-05	0.000518195
	ZNF707	835.068	1323.66	1.55253	0.634621	7.56679e-05	0.000518195
	SUGT1	2661.39	1833.75	0.695913	-0.523021	7.5751e-05	0.000518494
	RGS16	658.662	1088.62	1.61119	0.688125	7.63291e-05	0.000522179
	AATF	8959.04	6499.77	0.731074	-0.45191	7.67914e-05	0.000524795
	RBBP7	8130.41	5998.58	0.742113	-0.430288	7.67519e-05	0.000524795
	CNN3	6072.58	4344.08	0.722561	-0.468808	7.69736e-05	0.000525766
	GAA	5505.35	7686.82	1.38754	0.472532	7.70565e-05	0.000525785
	TRIM37	4205.44	2967.23	0.711057	-0.491964	7.7034e-05	0.000525785
	SCRIB	12899.6	17519.6	1.34822	0.431054	7.76479e-05	0.000529546
	TMEM11	1979.29	1323.35	0.677723	-0.561233	7.81412e-05	0.000532633
	CORO1B	4364.37	6001.09	1.36553	0.449464	7.83817e-05	0.000533996
	PPCDC	1259.91	789.64	0.640177	-0.643457	7.85127e-05	0.000534611
	EPHB3	281.96	567.676	1.90219	0.927664	7.87011e-05	0.000535616
	RAD23A	11824.8	8782.33	0.747305	-0.42023	7.8836e-05	0.000536257
	TEAD4	2725.87	1881.7	0.697159	-0.520439	7.89584e-05	0.000536811
	EFTUD2	13924	10431.7	0.752977	-0.409322	7.90772e-05	0.00053734
	PITX1	1964.46	1311.86	0.675106	-0.566814	7.9782e-05	0.00054185
	RFXANK	1426.05	2132.05	1.47767	0.563321	8.04409e-05	0.000545686
	TBC1D32	275.639	553.388	1.87141	0.904127	8.04715e-05	0.000545686
	TMEM120B	1400.19	2088.56	1.47541	0.56112	8.04466e-05	0.000545686
	AGPS	3162.85	2146.33	0.686483	-0.542704	8.05218e-05	0.000545745
	TEX10	3683.29	2594.61	0.711994	-0.490064	8.05788e-05	0.00054585
	SUMO3	1872.35	1241.22	0.672836	-0.571674	8.07382e-05	0.000546647
	BAIAP2-AS1	598.667	1003.08	1.64139	0.714916	8.08554e-05	0.000546938
	SORBS3	5015.67	3504.62	0.7046	-0.505124	8.08644e-05	0.000546938
	KIAA0368	8712.3	6396.89	0.739704	-0.43498	8.16013e-05	0.00055155
	SNW1	6165.9	4427.43	0.723353	-0.467229	8.16302e-05	0.00055155
	TSPAN3	6845.27	4981.84	0.731241	-0.451582	8.18901e-05	0.000553021
	RELT	1606.36	1007.89	0.637535	-0.649424	8.2478e-05	0.000556705
	RRAD	48.1439	166.34	2.53339	1.34107	8.25241e-05	0.00055673
	SLC35E2	186.327	409.118	1.99585	0.997003	8.2603e-05	0.000556977
	PGRMC1	4605.44	3314.35	0.725105	-0.463738	8.27619e-05	0.000557762
	ADAM9	13454.5	9997.83	0.747586	-0.419689	8.28266e-05	0.000557911
	C7orf55	431.66	771.089	1.71144	0.775208	8.32901e-05	0.000560746
	GRB7	868.618	1394.8	1.56135	0.64279	8.34378e-05	0.000561452
	TNRC6C	1293.48	1940.82	1.48149	0.567045	8.35402e-05	0.000561854
	UBN2	780.974	1248.39	1.56237	0.643735	8.36439e-05	0.000562264
	SNX19	1686.53	2462.19	1.44485	0.530921	8.49676e-05	0.000570869
	HS1BP3	978.623	1509.71	1.51942	0.60352	8.68229e-05	0.000583036
	SLC30A7	852.012	1368	1.57084	0.65154	8.74784e-05	0.000587138
	CENPB	4743.32	3361.47	0.713815	-0.486378	8.79955e-05	0.00058941
	DNAJC7	6588.57	4811.99	0.735546	-0.443112	8.79228e-05	0.00058941
	SBDSP1	2078.68	1357.5	0.667274	-0.583649	8.79423e-05	0.00058941
	TMPO-AS1	253.917	96.9096	0.448336	-1.15735	8.79964e-05	0.00058941
	DCAF15	3091.87	2101.43	0.684352	-0.54719	8.82743e-05	0.00059097
	TRIM28	55608.4	41924.4	0.755159	-0.405148	8.86031e-05	0.000592869
	PHLDB2	7787.85	5324.76	0.689753	-0.535849	8.90395e-05	0.000595486
	ACBD3	1585.41	2372.74	1.47365	0.559394	8.93128e-05	0.00059701
	TSPAN1	142.742	340.75	2.10931	1.07677	8.97271e-05	0.000599474
	CCDC57	2702.06	3796.94	1.39346	0.478672	8.98246e-05	0.00059982
	PSMC3	14900.6	11203.7	0.755045	-0.405365	9.11322e-05	0.000608243
	MRPS30	4646.76	3335.87	0.724175	-0.46559	9.14914e-05	0.00061033
	ATP7B	548.538	922	1.6328	0.707345	9.20071e-05	0.000613202
	RAB35	7647.77	5623.37	0.738725	-0.436892	9.20153e-05	0.000613202
	NUDT16P1	114.771	286.483	2.16423	1.11385	9.22568e-05	0.0006145
	C22orf29	2161.51	3086.29	1.41313	0.49889	9.29009e-05	0.000618476
	FARSB	7589.67	5562.38	0.737559	-0.43917	9.31006e-05	0.000619491
	STT3B	6396.54	4692.02	0.738102	-0.438108	9.42571e-05	0.000626869
	FCHSD1	836.937	1320.62	1.54495	0.627558	9.50063e-05	0.000631532
	PRELID2	555.43	279.716	0.540591	-0.887391	9.56061e-05	0.000635198
	C17orf89	2659.66	3736.14	1.39347	0.478686	9.58126e-05	0.000636248
	PPID	4599.6	3320.5	0.727285	-0.459406	9.62876e-05	0.000639079
	MTMR3	1746.86	2529.89	1.43309	0.519126	9.63533e-05	0.000639192
	CCDC109B	802.193	462.553	0.597097	-0.743962	9.66972e-05	0.00064115
	OPTN	566.502	951.107	1.62942	0.704362	9.67626e-05	0.000641259
	LYPLA2	1979.27	2837.88	1.41929	0.505171	9.70727e-05	0.00064299
	TRIM22	9.24176	74.8083	2.90372	1.5379	9.74021e-05	0.000644847
	DOK7	15.9288	93.7774	2.8498	1.51086	9.87446e-05	0.000653406
	UBE3B	1254.96	1878.02	1.4765	0.562178	9.89058e-05	0.000654143
	EFCAB10	20.4615	105.885	2.80149	1.48619	9.94988e-05	0.000657733
	OPLAH	1131.77	1713.27	1.49453	0.579695	9.95536e-05	0.000657765
	TMEM127	2175.96	3123.39	1.41822	0.50408	0.000100049	0.000660704
	PPP4R1	3844.89	2715.73	0.712335	-0.489373	0.000100183	0.000661256
	DCUN1D5	3069.47	2156.14	0.708849	-0.49645	0.000100287	0.00066128
	SPC24	405.994	181.479	0.496153	-1.01114	0.000100268	0.00066128
	MYEOV	8658.69	12151.6	1.40264	0.488144	0.000100512	0.00066243
	HN1L	12689.9	9460.34	0.748596	-0.41774	0.000100627	0.000662854
	PLEK2	2245.51	1529	0.689188	-0.537031	0.000100731	0.000663212
	FKBP5	5578.95	4053.21	0.732697	-0.448711	0.000100979	0.000664506
	NRM	543.029	271.558	0.53649	-0.898378	0.000101402	0.000666956
	SCRN2	1143.84	1745.78	1.50387	0.588679	0.000102199	0.000671864
[truncated: 2,365 more rows]

## Sheet: MCF7
Total RNA-seq - MCF7 - DESeq2 Results (Nutlin vs. DMSO) - Refseq genes - padj < 0.05
	Gene ID	Base Mean DMSO	Base Mean Nutlin	Fold Change	Fold Change (log2)	p	padj
	ABCA12	258.648	21308.4	80.1409	6.32447	0	0
	BTG2	837.549	17433.9	20.407	4.35099	0	0
	CDKN1A	4480.33	215597	47.4313	5.56777	0	0
	GPR87	199.62	8254.24	39.917	5.31893	0	0
	MDM2	2066.06	93669.2	44.5847	5.47848	0	0
	MKI67	17645.9	403.462	0.0230823	-5.43707	0	0
	NYNRIN	399.454	12110.2	29.6539	4.89015	0	0
	TP53I3	343.23	31222	88.461	6.46697	0	0
	TP53INP1	777.801	22900	29.2028	4.86803	0	0
	NUPR1	43.3929	4777.42	100.651	6.65322	2.15881e-272	3.13718e-269
	CMBL	544.986	9625.06	17.3297	4.11517	1.18991e-257	1.57198e-254
	LY6D	144.984	4867.28	32.3015	5.01353	3.16178e-256	3.82891e-253
	FAS	61.9973	5708.52	86.6905	6.4378	5.4168e-255	6.05515e-252
	GGT6	63.1953	4351.53	64.536	6.01203	3.17743e-250	3.29817e-247
	ZNF488	236.788	5488.13	22.5043	4.49213	2.2242e-242	2.1548e-239
	ATAD2	10759.9	761.096	0.0718562	-3.79874	4.60602e-234	4.18342e-231
	PRODH	432.821	7624.26	17.2466	4.10824	1.52283e-231	1.30176e-228
	GLS2	222.484	5027.67	21.9537	4.45639	9.1208e-230	7.36352e-227
	C17orf82	165.079	5084.99	29.757	4.89516	3.66596e-229	2.80388e-226
	ANK1	83.3835	3678.97	41.8422	5.38689	5.9054e-225	4.29086e-222
	LRP1	1001.62	11103.2	10.9246	3.44951	1.67831e-217	1.16139e-214
	CDCA5	5081.8	206.454	0.0418307	-4.57929	5.02525e-214	3.31941e-211
	C1orf95	350.97	5857.77	16.1929	4.01729	1.4751e-211	9.32008e-209
	ZMAT3	473.66	7016.38	14.5364	3.86159	2.97287e-209	1.80007e-206
	PLK1	5965.8	247.672	0.0431928	-4.53306	7.25766e-208	4.21874e-205
	FDXR	1259.49	13996.5	10.923	3.4493	1.23791e-202	6.91896e-200
	KIAA1217	376.136	6929.52	17.8306	4.15628	1.29583e-201	6.97446e-199
	RRM2B	1900.78	16645.4	8.66497	3.11519	6.27329e-201	3.25584e-198
	GADD45A	214.745	4354.11	19.695	4.29976	1.02947e-200	5.15873e-198
	ESPL1	3893.97	110.276	0.0296211	-5.07723	8.33313e-200	4.03657e-197
	MCM2	7633.92	620.846	0.0827454	-3.59518	1.33052e-199	6.23714e-197
	INPP5D	12.6075	4447.91	278.562	8.12185	1.22147e-198	5.54702e-196
	UBE2C	4637.44	235.25	0.0524108	-4.25399	7.70029e-192	3.39093e-189
	CENPF	4114.01	179.095	0.0450839	-4.47124	1.56554e-191	6.69129e-189
	EDA2R	294.921	4732.88	15.6719	3.97011	3.52446e-189	1.46335e-186
	BBC3	393.135	5837.49	14.5468	3.86263	5.55822e-189	2.24367e-186
	HES2	208.759	4025.07	18.7053	4.22538	3.89845e-188	1.53114e-185
	SESN1	485.675	6650.12	13.3761	3.74159	2.0399e-182	7.80099e-180
	DDIT4	2669.38	21339.8	7.90833	2.98337	7.50206e-180	2.79538e-177
	ADAMTS7	185.111	4415.02	22.8578	4.51462	1.97002e-178	7.1571e-176
	BRIP1	10428.8	1181.47	0.114741	-3.12355	2.52987e-178	8.96683e-176
	MCM3	10933	1131.88	0.104854	-3.25355	6.38463e-178	2.20908e-175
	TOP2A	11165.6	1316.49	0.119319	-3.0671	1.41032e-176	4.76621e-174
	CCNA2	3104.18	73.7455	0.0254179	-5.29801	7.823e-176	2.58372e-173
	HMGB2	5880.4	417.496	0.0722551	-3.79076	1.05735e-175	3.41453e-173
	ANLN	5041.19	361.947	0.0734577	-3.76694	1.04249e-174	3.29337e-172
	KIFC1	4352.51	252.469	0.0598936	-4.06145	3.79399e-170	1.17307e-167
	AHNAK2	875.39	9107.26	10.2445	3.35678	8.10213e-170	2.45292e-167
	CYFIP2	1170.05	9988.62	8.41673	3.07326	9.47745e-170	2.81074e-167
	SPATA18	185.077	4330.71	22.7428	4.50734	2.68623e-168	7.80725e-166
	NEAT1	14944.4	86063.2	5.72258	2.51667	4.75602e-166	1.35519e-163
	SERPINF1	36.2002	2765.9	69.2198	6.11311	3.36564e-165	9.40567e-163
	TACC3	5896.18	298.065	0.0522923	-4.25726	1.24155e-164	3.40419e-162
	PRC1	7453.07	624.017	0.0858859	-3.54143	2.16444e-164	5.82476e-162
	FHL2	831.151	7872.64	9.25055	3.20954	3.88568e-162	1.02667e-159
	RRM2	6621.28	363.276	0.0559241	-4.16039	2.01582e-160	5.23105e-158
	PROM2	3617.09	25004.6	6.83494	2.77293	3.24299e-159	8.26791e-157
	BIRC5	4493.68	238.94	0.0542005	-4.20555	2.50606e-158	6.27899e-156
	DDB2	2627.87	17144.4	6.46936	2.69362	1.56133e-155	3.84564e-153
	LMNB1	6027.12	489.926	0.0822141	-3.60447	4.37757e-153	1.06025e-150
	FAM212B	583.147	6662.25	11.2731	3.49481	6.30315e-153	1.5016e-150
	ACTA2	63.5449	2412.64	35.4606	5.14815	6.00516e-151	1.40753e-148
	KLHDC7A	73.7648	2521.41	32.1028	5.00463	2.39043e-150	5.51392e-148
	TPX2	8945.24	1125.82	0.127901	-2.9669	4.25991e-150	9.67266e-148
	STEAP3	2445.05	15306.6	6.20298	2.63296	5.33732e-148	1.19326e-145
	HJURP	2898.02	117.726	0.0423921	-4.56006	3.87297e-146	8.52758e-144
	FOSL1	65.7407	2388.85	33.4781	5.06515	7.92157e-146	1.71815e-143
	SESN2	910.103	7238.68	7.84741	2.97222	9.54347e-146	2.0395e-143
	TNFRSF10C	70.4541	2284.86	30.5981	4.93537	1.42879e-145	3.00916e-143
	CDK1	3631.31	168.712	0.0484361	-4.36777	2.64006e-144	5.48076e-142
	NTN4	744.896	6363.43	8.42756	3.07512	3.93658e-144	8.05723e-142
	NUSAP1	3053.48	172.201	0.0585304	-4.09467	4.81466e-141	9.7176e-139
	POLH	646.658	5688.62	8.6668	3.1155	4.84367e-139	9.64222e-137
	NCAPH	2305.48	71.7651	0.0332262	-4.91153	3.60106e-137	7.07171e-135
	PKMYT1	5854.52	495.236	0.086068	-3.53838	1.27574e-136	2.47187e-134
	CCNG1	2557.62	15078.8	5.83038	2.54359	1.48267e-136	2.83501e-134
	TAP1	647.88	5542.29	8.42577	3.07481	1.27861e-135	2.41308e-133
	MCM10	2344.69	46.9716	0.0218962	-5.51318	4.27605e-135	7.96662e-133
	VWCE	35.7845	1817.83	45.8999	5.52042	7.6693e-134	1.41076e-131
	GRIN2C	45.2476	2246.25	44.8429	5.48681	1.58359e-133	2.87659e-131
	PHF19	3254.68	230.989	0.0728004	-3.77991	3.38053e-131	6.06492e-129
	AQP3	4010.24	21637.6	5.31737	2.41071	8.62358e-131	1.52827e-128
	PLXNB3	2200.78	14921.3	6.75913	2.75684	1.06175e-129	1.85896e-127
	MCM6	9193.48	1034.23	0.114143	-3.13109	1.37568e-129	2.37992e-127
	TNFRSF10B	2172.2	12434.7	5.67188	2.50383	4.49192e-128	7.67961e-126
	XG	27.2722	1721.44	55.5036	5.79451	6.83006e-128	1.15412e-125
	TROAP	3269.38	233.989	0.0742303	-3.75185	6.52441e-127	1.0898e-124
	TICRR	2355.31	100.47	0.0448333	-4.47929	9.85628e-127	1.62763e-124
	TUBA1B	33912	6627.29	0.195692	-2.35334	7.40347e-126	1.20885e-123
	LTBP2	148.561	2427.24	15.7163	3.97419	4.08263e-125	6.59209e-123
	WDR62	2785.05	179.308	0.0670409	-3.89881	9.14465e-125	1.46033e-122
	ALOX12B	11.9808	2208.44	143.884	7.16877	1.4335e-124	2.26431e-122
	TMEM229B	595.712	4954.4	8.18203	3.03246	1.7064e-124	2.66638e-122
	GINS2	5061.56	508.038	0.102273	-3.28951	1.06738e-122	1.65012e-120
	C12orf5	662.195	5138.11	7.64615	2.93473	2.93043e-122	4.48263e-120
	SAPCD2	7848.33	1219.05	0.157368	-2.66779	3.21337e-121	4.86424e-119
	KIF11	2906.71	202.498	0.0717678	-3.80052	1.1997e-119	1.79732e-117
	PSTPIP2	365.264	3621.56	9.7213	3.28115	2.7847e-119	4.12931e-117
	PPM1D	7982.65	36832.1	4.58388	2.19657	3.46024e-119	5.07921e-117
	DLGAP5	2481.85	88.6909	0.0384598	-4.7005	8.94411e-119	1.29976e-116
	KIAA0513	1833.72	11054.2	5.97692	2.5794	1.26996e-118	1.82724e-116
	BUB1B	2596.91	136.833	0.0546269	-4.19424	1.35039e-117	1.92391e-115
	LINC00086	17.3849	1921.65	89.8347	6.4892	3.12763e-117	4.41269e-115
	AURKB	2326.53	77.9571	0.0362786	-4.78474	3.52042e-116	4.87226e-114
	ST6GALNAC2	1642.94	9380.07	5.63433	2.49424	3.49462e-116	4.87226e-114
	TP53TG1	526.571	4317.49	8.04122	3.00742	9.76941e-116	1.33933e-113
	IQGAP3	4929.96	526.598	0.108618	-3.20266	1.2111e-115	1.64484e-113
	RAP2B	2255.4	11991	5.26997	2.39779	4.78561e-115	6.43931e-113
	CCNB1	8411.48	1043.08	0.127375	-2.97284	8.20699e-115	1.09416e-112
	MCM4	10811.4	1988.08	0.185689	-2.42904	9.8888e-115	1.3064e-112
	KIF14	1911.11	49.2486	0.0284595	-5.13495	1.65634e-114	2.16846e-112
	ARHGAP11A	2797.68	227.333	0.08376	-3.57759	1.0052e-113	1.30425e-111
	E2F1	2876.71	119.405	0.0433088	-4.52919	3.5515e-113	4.52723e-111
	MCM7	20366	4144.3	0.204304	-2.29121	3.54308e-113	4.52723e-111
	TMPO	6982.64	1107.62	0.160507	-2.63929	1.11796e-111	1.41272e-109
	BUB1	3217.01	199.439	0.0648913	-3.94583	6.01053e-110	7.52974e-108
	KIF23	3389.56	211.498	0.0639313	-3.96733	8.37686e-110	1.04045e-107
	RACGAP1	5094.01	721.316	0.143554	-2.80034	1.51336e-109	1.86374e-107
	CDC20	3213.71	187.568	0.0613986	-4.02565	5.66703e-109	6.92044e-107
	FEN1	5489.47	546.37	0.100834	-3.30994	2.11107e-108	2.55651e-106
	CAPN2	1294.13	7389.08	5.64547	2.49709	7.54369e-108	9.05991e-106
	KANK3	24.0532	1383.57	50.1315	5.64764	1.27206e-107	1.51521e-105
	SYTL1	1880.75	10007.7	5.26647	2.39684	3.96789e-107	4.68791e-105
	CLCA2	1.78006	2959.9	598.201	9.22449	1.83319e-106	2.14838e-104
	UNC5B	478.203	3822.2	7.85789	2.97414	5.7752e-106	6.71402e-104
	RPS27L	1825.52	9586.52	5.21113	2.3816	4.65829e-105	5.37256e-103
	SPNS2	730.511	4870.57	6.5659	2.71499	1.78405e-104	2.04141e-102
	SLC52A1	40.3871	1428.31	32.2051	5.00922	2.61453e-104	2.9683e-102
	COL17A1	5.76441	1902.42	213.146	7.7357	4.48438e-104	5.0517e-102
	UBE2T	2826.37	227.834	0.0827587	-3.59495	1.12043e-103	1.25247e-101
	H2AFX	11311	1784.54	0.15964	-2.64711	1.83676e-103	2.03754e-101
	CEL	65.9709	1623.4	22.8856	4.51637	9.61686e-103	1.05873e-100
	ACER2	171.86	2192.08	12.2804	3.61828	2.97803e-102	3.25389e-100
	ASF1B	3375.27	381.848	0.115313	-3.11637	6.41435e-102	6.95622e-100
	KIF18B	1667.21	48.6137	0.0318772	-4.97133	3.00613e-101	3.23593e-99
	ANXA1	244.776	2546.62	10.1131	3.33815	6.42289e-101	6.86304e-99
	TMEM144	162.211	2189.88	12.9684	3.69693	8.29494e-101	8.79869e-99
	PDE4C	30.1587	1295.84	38.194	5.25527	4.45048e-100	4.68655e-98
	CES2	1250.91	6904.71	5.47505	2.45287	3.19345e-99	3.33864e-97
	GTSE1	1789.72	82.3736	0.0494986	-4.33647	2.46533e-98	2.55901e-96
	RECQL4	4673.1	562.872	0.122715	-3.02662	2.94714e-98	3.03743e-96
	CD82	107.963	1800.03	15.8937	3.99038	4.20447e-98	4.30277e-96
	TMEM40	86.1059	1647.58	18.1492	4.18183	7.26193e-98	7.37974e-96
	SKA3	1921.47	122.234	0.0666464	-3.90733	9.82316e-98	9.9132e-96
	ZNF385A	1356.25	7747.5	5.66111	2.50108	6.06262e-97	6.076e-95
	CDCA8	2457.1	228.975	0.0960917	-3.37944	2.06103e-96	2.05143e-94
	DPYSL4	170.31	2160.38	12.2472	3.61438	5.46198e-96	5.39956e-94
	GM2A	1218.3	6502.16	5.27662	2.39961	1.04735e-95	1.02838e-93
	NCAPG2	7731.56	1334.49	0.174129	-2.52177	1.17752e-95	1.14844e-93
	CDC6	2004.78	111.253	0.0586901	-4.09074	6.19211e-95	5.99892e-93
	EPAS1	2688.7	11923.2	4.40035	2.13762	1.30663e-94	1.25748e-92
	SPAG5	3038.97	360.927	0.121614	-3.03962	1.88033e-94	1.7977e-92
	HHAT	139.81	2049.29	14.0846	3.81605	1.89638e-94	1.80119e-92
	NCAPG	1625.84	35.5233	0.0247056	-5.33902	3.70698e-94	3.49804e-92
	RASAL1	998.892	6083.3	5.99871	2.58465	1.20784e-93	1.13241e-91
	CEP55	2222.49	166.222	0.0783548	-3.67383	2.85635e-93	2.6608e-91
	ZWINT	4984.22	717.932	0.14516	-2.78428	4.22764e-92	3.91312e-90
	TRIP13	3788.45	522.892	0.139977	-2.83674	5.89055e-92	5.41781e-90
	TMEM63B	3269.74	13763.8	4.17942	2.0633	9.778e-92	8.93672e-90
	ID3	1432.41	8362.1	5.72944	2.51839	1.73355e-91	1.5745e-89
	ASCC3	2827.27	12569.9	4.40829	2.14022	3.90476e-91	3.52447e-89
	MICALL1	1538.78	7496.17	4.82	2.26903	6.02207e-90	5.40202e-88
	FADS1	5304.49	20743.5	3.88526	1.95801	1.15569e-89	1.03034e-87
	PRICKLE2	2121.55	9630.46	4.50542	2.17166	2.35312e-88	2.0851e-86
	DGKA	237.068	2574.13	10.6859	3.41764	5.53971e-88	4.87898e-86
	GBE1	519.662	3696.96	6.95292	2.79762	6.21401e-88	5.43987e-86
	MSH6	4905.92	840.749	0.174096	-2.52204	7.05868e-86	6.14232e-84
	EPS8L2	6378.63	23702	3.69445	1.88536	1.93963e-85	1.67778e-83
	TIMP3	411.731	2994.39	7.09701	2.82721	2.63529e-85	2.26604e-83
	HSPA4L	585.808	3680.46	6.18162	2.62798	3.03521e-85	2.59457e-83
	BAX	4072.77	15972.5	3.89154	1.96034	3.22245e-85	2.73852e-83
	YPEL3	971.166	5174.13	5.28863	2.40289	9.33635e-85	7.88813e-83
	ZNF561	464.131	3141.61	6.64352	2.73195	1.1539e-83	9.69277e-82
	RAD54L	1486.8	62.2096	0.0453377	-4.46315	1.17656e-83	9.82629e-82
	INCENP	3287.35	484.883	0.150005	-2.73692	1.19414e-83	9.91613e-82
	CCNE2	1351.14	52.2361	0.042439	-4.55847	1.39958e-83	1.15561e-81
	ALDH1A3	562.499	3675.56	6.36905	2.67108	1.96978e-83	1.61722e-81
	FAM214A	1678.71	7599.99	4.48558	2.16529	5.65248e-83	4.61471e-81
	DTL	1201.92	23.2351	0.0228882	-5.44925	6.464e-83	5.24775e-81
	PTAFR	76.4765	1343.27	16.5226	4.04637	4.64956e-82	3.75374e-80
	CATSPERG	92.755	1620.94	16.4495	4.03997	6.6868e-82	5.36865e-80
	DNAJB2	1700.67	7512.25	4.37686	2.1299	2.60996e-81	2.08395e-79
	PRR11	4254.94	749.039	0.179496	-2.47797	7.71549e-81	6.12686e-79
	ALS2CL	696.436	4052.46	5.72067	2.51619	1.98655e-80	1.56894e-78
	PROCR	187.337	1926.13	10.0014	3.32213	4.36068e-80	3.42537e-78
	UNG	4357.31	669.275	0.15662	-2.67466	4.93484e-80	3.85554e-78
	NDC80	1365.48	19.6126	0.0175036	-5.8362	6.80284e-80	5.28657e-78
	MELK	2202.37	187.256	0.0873651	-3.5168	7.45601e-80	5.76334e-78
	FAM64A	1115.44	17.6363	0.0193376	-5.69245	1.89695e-79	1.45855e-77
	PADI4	19.506	981.47	41.9246	5.38973	3.64067e-79	2.78454e-77
	TBX4	5.28475	1117.63	134.467	7.07111	6.51158e-79	4.95425e-77
	XPC	2970.45	11931.2	3.97676	1.99159	2.20796e-78	1.67115e-76
	CDT1	5340.23	1011.9	0.190978	-2.38852	3.41685e-78	2.57273e-76
	AURKA	4193.38	574.062	0.140624	-2.83008	1.61389e-77	1.20892e-75
	H2AFZ	12865.8	3344.56	0.261617	-1.93447	1.76332e-77	1.31408e-75
	BCL2L1	2652.17	10492.3	3.93033	1.97465	8.90708e-77	6.60396e-75
	BHLHE40	1340.66	6185.92	4.5736	2.19333	1.15413e-76	8.51361e-75
	SULF2	58968.2	196733	3.32629	1.73391	3.26356e-76	2.39525e-74
	TCF19	1984.74	111.576	0.0587188	-4.09003	3.99974e-76	2.92081e-74
	NHLH2	3.05275	1179.82	194.899	7.60658	6.28869e-76	4.56936e-74
	POLE	7837.21	1890.79	0.243281	-2.03931	6.72542e-76	4.86238e-74
	HSPB8	1260.7	6068.11	4.75643	2.24988	2.06558e-75	1.48599e-73
	CCDC90B	1129.85	5252.8	4.59988	2.2016	1.21932e-74	8.72868e-73
	FAM111B	1148.63	11.7867	0.0138075	-6.1784	1.52482e-74	1.08621e-72
	MAD2L1	2357.17	170.529	0.0749602	-3.73773	2.87139e-74	2.03547e-72
	TRAF4	3748.2	13564.7	3.59527	1.8461	3.22312e-74	2.2737e-72
	ZNF367	1222.25	62.4226	0.055265	-4.17749	5.32276e-74	3.73673e-72
	CDKN3	1758.77	164.785	0.0971348	-3.36387	5.50373e-74	3.8452e-72
	ZNF185	2976.56	11353	3.78006	1.91841	7.83392e-74	5.44701e-72
	HSPG2	2791.4	10628	3.77044	1.91473	9.4436e-74	6.53497e-72
	FAT1	1468.81	6342.14	4.27628	2.09636	1.57394e-73	1.084e-71
	ZNF219	1501.83	6540.31	4.31609	2.10972	2.19003e-73	1.5012e-71
	ARVCF	1499.53	6651.15	4.38291	2.13189	1.63959e-72	1.11861e-70
	KIF4A	1691.64	106.357	0.0655809	-3.93058	2.00928e-72	1.36123e-70
	TOMM40	5484.62	1122.77	0.206044	-2.27897	2.01393e-72	1.36123e-70
	PHLDA3	3449.13	13876.1	3.99984	1.99994	2.28131e-72	1.53481e-70
	ADCY3	3413.85	560.332	0.167545	-2.57738	4.17025e-72	2.79273e-70
	BCAS1	1007.16	5332.93	5.21758	2.38338	4.46535e-72	2.97662e-70
	CIT	2177.91	262.693	0.124803	-3.00227	4.57458e-72	3.03552e-70
	BRCA1	2225.59	288.372	0.13315	-2.90887	8.96845e-72	5.92407e-70
	FAXDC2	118.654	1673.3	13.6664	3.77257	9.31271e-72	6.12363e-70
	SPC25	995.486	19.951	0.0240816	-5.37593	1.04295e-71	6.82712e-70
	HNRNPAB	22269.3	6660.08	0.300443	-1.73484	2.33715e-71	1.52302e-69
	PI4K2A	1186.64	5287.46	4.41186	2.14139	3.90439e-71	2.53298e-69
	MKNK2	1831.27	7294.86	3.95097	1.98221	5.93451e-71	3.8329e-69
	NOTCH1	4181.42	14792.3	3.51587	1.81388	2.08668e-70	1.34175e-68
	HMMR	1369	70.1689	0.0561953	-4.15341	5.36062e-70	3.43174e-68
	ITGA3	4308.13	17745.4	4.07493	2.02677	5.97009e-70	3.80515e-68
	TRIAP1	1974.1	7675.7	3.85952	1.94842	1.02799e-69	6.52348e-68
	ANKRA2	327.439	2268.51	6.76986	2.75913	1.26174e-69	7.97199e-68
	FANCA	5482.98	977.717	0.179712	-2.47624	1.83502e-69	1.1544e-67
	EXO1	1192.45	46.4661	0.0429234	-4.54209	1.93141e-69	1.2098e-67
	LIMK2	1193.56	5254.42	4.35257	2.12187	2.80736e-69	1.75093e-67
	TONSL	4128.61	749.297	0.183357	-2.44728	3.26866e-69	2.02992e-67
	MIR22HG	471.861	2783.69	5.79546	2.53492	9.41537e-69	5.8223e-67
	CSNK1G1	1002.27	4635.9	4.57401	2.19346	1.03237e-68	6.33699e-67
	NDRG1	1064.48	6894.79	6.12946	2.61576	1.03349e-68	6.33699e-67
	IER5	1924.93	7771.53	4.01036	2.00373	1.37086e-68	8.37029e-67
	MAP3K12	654.448	3401.04	5.12094	2.35641	2.45854e-68	1.49487e-66
	MUC19	3.47698	933.41	144.524	7.17516	3.04073e-68	1.84116e-66
	NANOS1	229.979	1903.66	8.06046	3.01086	3.35335e-68	2.02203e-66
	CDC42SE1	7679.28	24644.1	3.19379	1.67527	9.86162e-68	5.92186e-66
	MTHFD1	9485.33	2169.22	0.229596	-2.12283	1.44248e-67	8.62637e-66
	PIDD1	743.794	3775.93	5.00768	2.32414	1.48871e-67	8.86639e-66
	RNF19A	2055.41	7750.6	3.74202	1.90382	2.8981e-67	1.71899e-65
	KLF4	1703.31	6688.47	3.89284	1.96082	2.94081e-67	1.73723e-65
	ACHE	79.6678	1157.12	13.645	3.7703	3.26472e-67	1.92076e-65
	MDM4	1425.51	5923.29	4.11528	2.04099	4.89187e-67	2.86648e-65
	TP53INP2	148.231	1507.06	9.80051	3.29286	6.8435e-67	3.99397e-65
	IKBIP	659.392	3376.19	5.05226	2.33693	7.06744e-67	4.10816e-65
	MAMDC4	1105.45	4820.25	4.32033	2.11114	1.00026e-66	5.79116e-65
	CD44	3152.67	11041.5	3.49375	1.80478	1.02797e-66	5.92798e-65
	SFN	3906.99	14880.9	3.76619	1.91311	1.2113e-66	6.95753e-65
	PIF1	948.132	12.6266	0.0173958	-5.84512	1.32244e-66	7.566e-65
	CASC5	1358.67	107.585	0.0839851	-3.57372	1.55781e-66	8.8777e-65
	SERPINB5	37.215	5171.04	95.6537	6.57975	1.95394e-66	1.10917e-64
	KITLG	716.914	3585.52	4.9146	2.29707	8.15294e-66	4.61006e-64
	CDC25A	950.451	33.5469	0.0400061	-4.64364	1.06637e-65	6.00641e-64
	AEN	2961.62	10401.3	3.48815	1.80246	1.22437e-65	6.86972e-64
	NOLC1	8847.93	1969.58	0.223132	-2.16403	2.82065e-65	1.57652e-63
	TM7SF3	3825.05	13350.8	3.47002	1.79494	3.4824e-65	1.93893e-63
	TK1	6159.29	976.347	0.158746	-2.6552	5.71807e-65	3.17156e-63
	KIF26A	1478.82	143.196	0.101229	-3.30431	6.90133e-65	3.81331e-63
	ORC1	1145.96	65.828	0.0617381	-4.01769	1.06597e-64	5.86768e-63
	KIF22	8094.67	1564.22	0.193172	-2.37204	2.25682e-64	1.23759e-62
	BLM	1340.62	115.248	0.0904714	-3.46639	2.30545e-64	1.25951e-62
	PRSS22	993.341	4418.43	4.38656	2.13309	2.88679e-64	1.57119e-62
	PBK	993.19	45.5008	0.0506278	-4.30393	3.00721e-64	1.63063e-62
	RETSAT	1739.22	6604.6	3.76649	1.91322	3.984e-64	2.15225e-62
	IGF1R	13007.6	42700.1	3.27205	1.7102	4.6214e-64	2.48734e-62
	EPHA2	2441.81	8817.6	3.58346	1.84136	7.3362e-64	3.93394e-62
	ORAI3	537.676	2867.19	5.24673	2.39142	1.26216e-63	6.74326e-62
	CHRNA3	23.1493	825.243	30.254	4.91905	1.32455e-63	7.0507e-62
	ASTN2	363.787	2286.84	6.14897	2.62035	1.46729e-63	7.78199e-62
	ISCU	1690.91	6447.79	3.78037	1.91853	2.04696e-63	1.08169e-61
	TTF2	5754.05	1426.46	0.249464	-2.0031	2.10418e-63	1.1079e-61
	CDCA7	1008.72	50.7194	0.0551409	-4.18073	2.32246e-63	1.21403e-61
	PVRL4	1368.01	6101.86	4.42793	2.14663	2.31678e-63	1.21403e-61
	RFC2	2659.4	467.175	0.178889	-2.48286	2.88453e-63	1.50244e-61
	PTK7	895.517	3993.1	4.40544	2.13929	6.29205e-63	3.26558e-61
	KIAA0247	1210.71	4999.06	4.09208	2.03283	7.31805e-63	3.78455e-61
	POLA2	3404.59	673.759	0.200699	-2.31689	8.86358e-63	4.56757e-61
	CENPE	1365.64	90.4044	0.0694324	-3.84825	9.28483e-63	4.76774e-61
	SMAD3	3810.13	12614.8	3.2873	1.7169	1.16383e-62	5.95519e-61
	JAG1	228.462	1767.84	7.5462	2.91575	1.43663e-62	7.32533e-61
	SHCBP1	1118.57	73.4489	0.0703972	-3.82834	1.7427e-62	8.85486e-61
	CCNB2	2014.47	217.497	0.112345	-3.15399	2.24947e-62	1.139e-60
	RALGDS	3173.5	11050.7	3.45701	1.78953	2.68021e-62	1.35239e-60
	RAD51	1350.82	106.825	0.0832336	-3.58669	2.93472e-62	1.47569e-60
	ANXA4	2112.89	7553.26	3.54836	1.82715	5.37044e-62	2.69115e-60
	CLSPN	921.987	37.0817	0.0451717	-4.46844	8.78692e-62	4.38802e-60
	DSP	18830.9	54899	2.90046	1.53628	1.14845e-61	5.71552e-60
	BRCA2	1630.47	195.219	0.123955	-3.01211	2.05844e-61	1.02093e-59
	PSRC1	2388.47	393.262	0.168685	-2.5676	5.32755e-61	2.63333e-59
	ALOX5	2.65623	818.219	145.964	7.18947	6.09578e-61	3.00284e-59
	LCAT	13.5945	702.324	41.1741	5.36366	1.25879e-60	6.17996e-59
	FBXO22	2663.49	9537.05	3.54678	1.82651	1.34717e-60	6.5916e-59
	FANCI	6201.21	1112.8	0.179331	-2.4793	1.61782e-60	7.88931e-59
	ALDH7A1	1198.82	4812.7	3.97437	1.99073	1.85055e-60	8.99403e-59
	BLOC1S2	1441.81	5787.53	3.96358	1.9868	5.91371e-60	2.8646e-58
	NOP56	10153.8	2947.07	0.291891	-1.7765	1.00978e-59	4.87512e-58
	DEK	6395.99	1690.39	0.26634	-1.90866	1.61968e-59	7.79377e-58
	NUF2	909.192	37.2489	0.0459653	-4.44331	1.99427e-59	9.56462e-58
	ABHD4	379.417	2225.47	5.73984	2.52101	2.33638e-59	1.11685e-57
	PTP4A1	3653.9	12587.6	3.40712	1.76855	3.94424e-59	1.87927e-57
	TMEM131	2140.77	7440.33	3.44896	1.78616	4.64448e-59	2.20567e-57
	PRKX	1012.24	4294.86	4.19371	2.06823	8.07798e-59	3.82375e-57
	NADSYN1	3567.52	11805.9	3.29206	1.71899	9.09082e-59	4.28922e-57
	STOM	1226.06	5593.09	4.52868	2.17909	1.13818e-58	5.35274e-57
	PERP	7411.6	23542.7	3.13577	1.64882	3.66942e-58	1.72013e-56
	POLD1	3341.92	727.428	0.220557	-2.18078	4.36893e-58	2.04146e-56
	TUBB	47209.5	16587	0.353891	-1.49862	9.79136e-58	4.56052e-56
	POLQ	1562.25	128.33	0.0860776	-3.53822	1.62268e-57	7.53379e-56
	C3orf52	123.854	1340.27	10.1726	3.34661	2.61226e-57	1.20896e-55
	FADS3	1110.83	4394.39	3.9204	1.971	5.23999e-57	2.41738e-55
	NFKBIA	1659.2	5961.04	3.56013	1.83193	5.51476e-57	2.53609e-55
	KIF15	781.117	22.2658	0.0338907	-4.88297	5.94647e-57	2.726e-55
	KPNA2	16339.7	4518.44	0.279311	-1.84006	1.52619e-56	6.97441e-55
	PAICS	6387.9	1791.68	0.282679	-1.82277	1.56916e-56	7.14827e-55
	ERCC6L	879.249	29.2936	0.0384353	-4.70142	1.83014e-56	8.31114e-55
	CDC45	2299.11	301.526	0.132869	-2.91192	1.99398e-56	9.02695e-55
	TIMELESS	7537.24	1720.07	0.226459	-2.14268	3.0239e-56	1.3647e-54
	DKC1	7240.29	2104.02	0.291717	-1.77736	4.0972e-56	1.84336e-54
	DRAM1	1571.06	5653.38	3.5644	1.83366	6.41713e-56	2.8782e-54
	ZNF337	1474.68	7491.55	4.97967	2.31605	8.69199e-56	3.88652e-54
	FAM210B	2105.19	7094.88	3.34636	1.74259	1.1255e-55	5.01712e-54
	TSC22D3	1983.22	6749.93	3.37877	1.7565	1.64467e-55	7.30895e-54
	MON2	2193.54	7410.78	3.35349	1.74566	1.72308e-55	7.63407e-54
	EML2	716.006	3197.22	4.39983	2.13745	2.04051e-55	9.01298e-54
	CXCL12	3812.72	804.843	0.211768	-2.23945	5.02327e-55	2.21207e-53
	LYST	398.703	2377	5.80567	2.53746	5.10989e-55	2.24341e-53
	CSF1	69.0236	947.42	12.7241	3.66949	5.67272e-55	2.47592e-53
	FAM83H-AS1	2146.95	7165.63	3.31718	1.72996	5.67355e-55	2.47592e-53
	FXYD3	10040.6	28500.6	2.81818	1.49476	8.75015e-55	3.8071e-53
	HES1	1408.48	5122.21	3.6048	1.84992	1.02379e-54	4.44109e-53
	HNRNPD	6454.7	1831.23	0.285579	-1.80804	1.16622e-54	5.04388e-53
	MYOF	9881.62	27730.9	2.79573	1.48323	1.32032e-54	5.69346e-53
	PNRC1	646.498	2950.21	4.48742	2.16589	2.47897e-54	1.06581e-52
	C9orf169	285.097	1793.37	6.13136	2.61621	3.94802e-54	1.69241e-52
	PAQR7	216.276	1767.92	7.76007	2.95607	4.65163e-54	1.98816e-52
	KIAA1524	1609.33	227.55	0.145837	-2.77758	5.17399e-54	2.20494e-52
	RFC3	3938.45	983.883	0.252267	-1.98698	1.02615e-53	4.36025e-52
	MAST4	885.323	3668.28	4.09718	2.03463	1.16736e-53	4.9458e-52
	SUGCT	5.25704	634.206	74.1439	6.21226	1.67438e-53	7.07328e-52
	CDCA7L	1088.28	96.0949	0.093648	-3.41661	3.59546e-53	1.51447e-51
	ZFYVE1	541.984	2766.93	5.03375	2.33163	5.31447e-53	2.23208e-51
	FAM196A	20.8064	731.735	29.1463	4.86524	8.17516e-53	3.42367e-51
	ZNF469	553.988	2728.24	4.81808	2.26846	1.14771e-52	4.79268e-51
	NCAPD3	3279.39	771.157	0.238003	-2.07095	1.50679e-52	6.27411e-51
	CHAF1A	2074.67	366.777	0.180038	-2.47362	1.52424e-52	6.32865e-51
	DHTKD1	4035.77	1034.94	0.259618	-1.94554	1.72606e-52	7.14617e-51
	ERRFI1	2466.66	7923.27	3.18139	1.66966	3.05995e-52	1.26327e-50
	CDCA3	1573.11	165.45	0.107877	-3.21254	3.84232e-52	1.58177e-50
	PLK4	1222.04	131.2	0.11285	-3.14752	5.7804e-52	2.3729e-50
	AMZ2	4107.02	12747.2	3.08581	1.62565	7.43885e-52	3.04511e-50
	STMN1	7533.82	2364.12	0.315837	-1.66275	1.44935e-51	5.91628e-50
	TTYH3	7469.21	20921.9	2.7878	1.47913	1.45481e-51	5.92191e-50
	KHNYN	3673.99	10890	2.94709	1.55929	1.57227e-51	6.38218e-50
	GDF15	2308.38	55281.2	21.1866	4.40508	1.57832e-51	6.3889e-50
	MCM5	5959.56	1420.02	0.237391	-2.07466	1.65319e-51	6.67338e-50
	GINS1	1656.11	255.665	0.158782	-2.65488	1.85104e-51	7.45133e-50
	PLK3	256.286	1628.54	6.17824	2.6272	1.98124e-51	7.95344e-50
	MAF	7.46133	564.172	52.9098	5.72546	2.99784e-51	1.20013e-49
	DUSP4	1532.64	5331.06	3.45418	1.78834	3.23372e-51	1.291e-49
	GPRIN1	1999.42	361.487	0.184811	-2.43588	3.46097e-51	1.37794e-49
	KDM4B	1206.19	4384.22	3.60082	1.84833	7.84623e-51	3.11534e-49
	LACC1	385.874	2047.82	5.20152	2.37893	1.00747e-50	3.98927e-49
	GATS	924.998	3615.79	3.8634	1.94987	1.37044e-50	5.41176e-49
	SERPINE1	77.067	919.252	11.1495	3.47891	1.65412e-50	6.51427e-49
	CHEK1	1125.04	112.214	0.105013	-3.25136	1.9581e-50	7.69058e-49
	FSTL4	114.033	1081.35	9.04055	3.17641	2.47591e-50	9.69808e-49
	E2F2	744.271	33.7141	0.0514943	-4.27944	5.61849e-50	2.19484e-48
	GRK6	3236.71	788.2	0.246257	-2.02176	6.57892e-50	2.56314e-48
	FOSL2	2048.8	6679.98	3.25467	1.70251	6.94132e-50	2.69709e-48
	C11orf82	1392.08	151.31	0.112379	-3.15356	1.38375e-49	5.36231e-48
	CCNG2	796.85	3260.29	4.05478	2.01962	1.58096e-49	6.11025e-48
	KCNN4	788.37	3237.48	4.04832	2.01732	2.10059e-49	8.09703e-48
	AKR1B10	62.4577	891.165	12.8378	3.68233	3.11766e-49	1.19857e-47
	GLUL	6288.35	20838.9	3.26275	1.70609	3.14628e-49	1.20638e-47
	LIMA1	1279.67	4669.06	3.61333	1.85333	5.16291e-49	1.97441e-47
	DCTPP1	9205.67	3034.37	0.331457	-1.59311	5.62514e-49	2.14553e-47
	C21orf58	1645.7	265.889	0.165808	-2.59242	6.12315e-49	2.32936e-47
	VPS9D1-AS1	2335.84	485.104	0.211187	-2.24341	6.33903e-49	2.40519e-47
	FBXO32	186.328	1364.24	7.0738	2.82248	6.88214e-49	2.60446e-47
	KNSTRN	1744.41	297.673	0.175169	-2.51318	7.89727e-49	2.98086e-47
	HEG1	687.608	3101.58	4.49471	2.16823	8.58301e-49	3.2313e-47
	ARHGAP30	43.928	733.633	15.0603	3.91268	9.3863e-49	3.52459e-47
	KRT13	490.802	2480.49	4.83495	2.2735	9.84631e-49	3.6878e-47
	SMC4	6205.49	1683.44	0.27166	-1.88012	2.14011e-48	7.99488e-47
	WSB1	2063.4	6651.91	3.20516	1.6804	2.19369e-48	8.17403e-47
	WHSC1	8331.22	2701.92	0.324817	-1.6223	2.86235e-48	1.06383e-46
	ERMP1	6855.66	18457.2	2.68	1.42224	3.02139e-48	1.12007e-46
	TGM2	1513.86	5055.74	3.30975	1.72672	4.8247e-48	1.78403e-46
	UBASH3B	128.262	1104.44	8.21514	3.03828	7.68324e-48	2.83383e-46
	S1PR3	1948.77	6178.01	3.14703	1.65399	8.22537e-48	3.0261e-46
	DNMT1	8793.75	2586.04	0.294081	-1.76572	1.06391e-47	3.90424e-46
	ESPN	1164.25	4208.74	3.57759	1.83899	1.11172e-47	4.06941e-46
	GABBR2	163.983	1228.64	7.21322	2.85064	1.27171e-47	4.64334e-46
	RHOC	8771.8	23575.3	2.6742	1.41911	1.29138e-47	4.70335e-46
	HSPA8	70300.6	27021.4	0.385993	-1.37335	1.79261e-47	6.51254e-46
	SRSF7	7585.79	2527.06	0.335238	-1.57674	3.31125e-47	1.19998e-45
	NOP16	3747.46	993.25	0.268264	-1.89828	3.31953e-47	1.19999e-45
	ZNF750	37.9803	692.405	16.3471	4.03096	3.71096e-47	1.33816e-45
	EPPK1	5535.71	15309.2	2.74956	1.4592	4.73002e-47	1.7014e-45
	ANP32E	3632.44	967.137	0.269821	-1.88992	5.78019e-47	2.07402e-45
	UBE2H	2451.25	7421.41	3.00464	1.58719	5.89237e-47	2.10906e-45
	RNF19B	484.005	2242.67	4.54915	2.1856	7.91271e-47	2.82525e-45
	RANBP1	4359.15	1238.55	0.286842	-1.80167	3.0614e-46	1.0904e-44
	SDC4	5864.42	15741.4	2.66986	1.41677	3.07104e-46	1.09116e-44
	LRP10	7211.42	19632	2.72105	1.44416	3.1382e-46	1.1123e-44
	LINC01021	5.22932	497.943	59.5211	5.89533	3.3979e-46	1.20142e-44
	CENPN	3670.62	987.51	0.271764	-1.87957	4.09174e-46	1.44323e-44
	DSCC1	1335.24	190.677	0.14817	-2.75468	4.79636e-46	1.68767e-44
	STAT3	1856.2	5828.88	3.12144	1.64221	4.8281e-46	1.69473e-44
	AXL	7.35047	509.451	47.3384	5.56494	5.17768e-46	1.81306e-44
	SLC7A11	404.777	2037.1	4.86633	2.28283	5.4767e-46	1.91316e-44
	MYO15B	549.213	2470.32	4.42545	2.14582	6.21662e-46	2.16643e-44
	MCC	348.487	1962.28	5.47814	2.45369	7.07301e-46	2.45897e-44
	KLHL24	468.358	2299.92	4.83794	2.27439	7.41126e-46	2.57042e-44
	PGPEP1	867.759	3811.35	4.36717	2.1267	9.10332e-46	3.14975e-44
	SERTAD1	524.301	2310.73	4.33665	2.11658	1.35559e-45	4.6792e-44
	CENPB	11581.1	4220.59	0.366383	-1.44858	1.91553e-45	6.59633e-44
	PKP1	1407.12	4644.51	3.26847	1.70862	2.02794e-45	6.96691e-44
	SEMA3B	1899.12	5892.15	3.0814	1.62359	2.34069e-45	8.02238e-44
	MANEAL	3571.96	986.744	0.279241	-1.84042	2.57088e-45	8.7906e-44
	LCE1B	0	596.372	203.176	7.66658	3.32141e-45	1.13302e-43
	EIF5A	14200.9	5099.72	0.359998	-1.47394	3.3871e-45	1.15272e-43
	PRKAB1	1787.7	5701.22	3.16287	1.66124	3.77587e-45	1.28203e-43
	CROT	677.708	2757.59	3.99773	1.99918	5.18959e-45	1.75793e-43
	ABHD2	8337.53	23483.6	2.79132	1.48095	5.85679e-45	1.97932e-43
	TTK	1287.78	141.504	0.114302	-3.12907	7.28918e-45	2.45769e-43
	KLF3	922.111	3370.14	3.61329	1.85331	8.17683e-45	2.75059e-43
	CENPO	2674.8	630.728	0.238221	-2.06963	8.30868e-45	2.78849e-43
	CDC42BPG	2935.69	8347.43	2.82691	1.49922	1.20976e-44	4.05073e-43
	EXOSC2	3028.4	752.15	0.251976	-1.98864	1.49155e-44	4.98281e-43
	CKAP2L	594.207	16.6252	0.0349991	-4.83654	1.96341e-44	6.5441e-43
	MASTL	1879.44	368.986	0.200458	-2.31863	2.90035e-44	9.64484e-43
	CAPN13	863.007	3178.09	3.64502	1.86593	4.03219e-44	1.3378e-42
	DNAJC9	2109.94	401.841	0.194141	-2.36482	4.41853e-44	1.46264e-42
	LRRC45	2475.02	592.567	0.242979	-2.0411	5.83905e-44	1.92848e-42
	CENPU	1252.33	179.563	0.148776	-2.74879	6.72879e-44	2.2173e-42
	CPEB4	253.244	1637.69	6.3224	2.66047	7.1943e-44	2.36533e-42
	CHAF1B	1662.24	305.294	0.188499	-2.40737	9.71828e-44	3.18795e-42
	ORC6	847.496	75.091	0.0952048	-3.39282	1.07519e-43	3.51906e-42
	ZDHHC7	7180.04	18367.9	2.54732	1.34898	1.26769e-43	4.1398e-42
	GPRC5A	5193.97	13666.6	2.62333	1.3914	1.34282e-43	4.37529e-42
	PLAU	302.853	1623.36	5.24818	2.39182	1.38003e-43	4.48647e-42
	CACYBP	3810.22	1089.93	0.288963	-1.79104	1.47357e-43	4.77989e-42
	APOBEC3C	9.49933	565.981	41.9042	5.38902	1.53218e-43	4.95895e-42
	PANK1	644.916	2683.71	4.09511	2.0339	1.55382e-43	5.01779e-42
	FANCG	3147.33	819.938	0.263325	-1.92508	1.68542e-43	5.43071e-42
	PLXNB2	17555.9	44032.4	2.49724	1.32033	1.69166e-43	5.43875e-42
	PCBP4	793.849	2970.91	3.69805	1.88677	1.7998e-43	5.77366e-42
	MOV10	3615.21	10531.7	2.88581	1.52898	2.30406e-43	7.37504e-42
	MXD1	855.445	3173.37	3.68504	1.88168	2.43557e-43	7.77884e-42
	UNC5B-AS1	0.424229	511.301	155.176	7.27776	3.86036e-43	1.23024e-41
	CBX2	5859.26	1948.42	0.334791	-1.57867	4.02197e-43	1.27893e-41
	P4HA2	1284.26	4212.89	3.25547	1.70287	4.19343e-43	1.33054e-41
	LAMC1	5568.07	15201.6	2.70394	1.43506	7.20784e-43	2.28201e-41
	TSPEAR	1.32812	496.126	115.755	6.85493	8.01511e-43	2.53208e-41
	CCDC83	679.823	2663.6	3.85346	1.94615	9.05065e-43	2.85301e-41
	SLC7A8	76.3464	821.305	9.97048	3.31766	1.00897e-42	3.17368e-41
	SEPT9	12994.8	32388.8	2.48199	1.3115	1.16027e-42	3.64168e-41
	SMC2	2948.37	752.255	0.258105	-1.95397	1.32781e-42	4.15856e-41
	C20orf27	6210.28	2086.33	0.337524	-1.56694	1.42837e-42	4.46388e-41
	CLDN4	15212.2	36871.1	2.41476	1.27188	1.60058e-42	4.99134e-41
	FAM213B	2145.3	474.758	0.225721	-2.14739	3.69174e-42	1.14879e-40
	SOX9	334.263	1790.85	5.21129	2.38164	8.00516e-42	2.48571e-40
	MRPL17	3951.96	1200.01	0.306472	-1.70617	8.02426e-42	2.48632e-40
	RNASEH2A	3183.25	854.651	0.270529	-1.88615	1.38753e-41	4.29011e-40
	ZFP90	1382.46	4616.49	3.31072	1.72714	1.46476e-41	4.51931e-40
	FBXO5	1054.16	106.992	0.107238	-3.22112	1.58767e-41	4.88814e-40
	POLD3	1580.51	301.037	0.195106	-2.35767	2.18919e-41	6.72585e-40
	AHSA1	8019.27	2915.11	0.365472	-1.45217	2.20586e-41	6.76279e-40
	SERINC5	1941.49	5949.2	3.05079	1.60918	2.61889e-41	8.01214e-40
	KLF6	1484.82	4713.48	3.14603	1.65353	3.7543e-41	1.14617e-39
	H1FX	8028.2	2663.44	0.329676	-1.60088	8.18303e-41	2.49299e-39
	DEPDC1B	966.789	91.5112	0.102046	-3.29271	1.07386e-40	3.26471e-39
	SLBP	2337.98	566.984	0.246491	-2.02039	1.13385e-40	3.43991e-39
	NTSR1	116.237	975.413	8.01832	3.0033	1.15993e-40	3.51169e-39
	FKBP5	1771.4	350.243	0.202458	-2.3043	1.64187e-40	4.96044e-39
	KCNJ2	6686.64	2352.59	0.354007	-1.49815	1.91744e-40	5.78096e-39
	HNRNPA2B1	34716.4	14318.4	0.412874	-1.27623	2.96705e-40	8.92694e-39
	DYRK1B	635.242	2451.11	3.80527	1.928	3.18362e-40	9.55875e-39
	CYGB	3.98435	435.445	60.8189	5.92645	5.44392e-40	1.63116e-38
	TELO2	6042.08	2029.55	0.337324	-1.56779	5.61602e-40	1.67926e-38
	TMEM201	2019.68	462.257	0.233343	-2.09948	5.9656e-40	1.78013e-38
	MDC1	2612.4	698.51	0.27094	-1.88395	9.04416e-40	2.69323e-38
	ITGA2	1864.51	5414.32	2.87902	1.52558	1.43051e-39	4.25115e-38
	MXD3	799.278	77.9531	0.104648	-3.25639	1.46353e-39	4.34042e-38
	TNS4	64.7174	717.62	10.2441	3.35672	1.49355e-39	4.42041e-38
	CABYR	161.401	1126.81	6.7338	2.75142	1.78067e-39	5.25948e-38
	ESCO2	503.806	9.00822	0.0260888	-5.26043	1.9621e-39	5.78361e-38
	DEPDC1	713.993	33.0872	0.0545381	-4.19659	2.29925e-39	6.76372e-38
	RFX5	1723.9	5379.62	3.07658	1.62133	3.66067e-39	1.07468e-37
	TMEM109	5872.44	2058.04	0.353377	-1.50072	4.36816e-39	1.2798e-37
	ELF3	6371.27	15727.2	2.46298	1.30041	4.45078e-39	1.30138e-37
	NOP14-AS1	375.388	1714.94	4.47698	2.16253	5.33681e-39	1.55732e-37
	HMGB1	6005.42	2018.38	0.337163	-1.56848	5.37788e-39	1.56616e-37
	WDHD1	1499.91	294.18	0.20111	-2.31394	7.99584e-39	2.32391e-37
	NASP	3759.19	969.415	0.25837	-1.95249	9.93516e-39	2.88179e-37
	CASZ1	1474.11	4769.13	3.18529	1.67142	1.05101e-38	3.04249e-37
	CENPM	1305.93	223.376	0.17609	-2.50561	1.15869e-38	3.34753e-37
	CCT5	27724.9	11461.3	0.415776	-1.26612	1.25641e-38	3.62265e-37
	RFC4	1973.62	417.905	0.215503	-2.21422	1.26187e-38	3.63118e-37
	IFITM10	3146.83	9632.45	3.06975	1.61812	1.70702e-38	4.90244e-37
	KNTC1	2845.88	809.764	0.287856	-1.79658	1.72066e-38	4.93188e-37
	UBR7	3274.56	896.031	0.277052	-1.85177	1.97887e-38	5.66081e-37
	GSN	6063.34	14826.7	2.43507	1.28396	2.0815e-38	5.94269e-37
	NEK2	574.432	31.3994	0.0630157	-3.98814	2.89281e-38	8.24282e-37
	KCTD15	2753.69	740.556	0.272232	-1.87709	3.1925e-38	9.07893e-37
	RHOD	3771.37	9631.91	2.54047	1.3451	4.67537e-38	1.327e-36
	CDCA2	876.243	102.074	0.12363	-3.0159	4.8937e-38	1.38626e-36
	KRT15	346.96	1619.86	4.59624	2.20045	5.61476e-38	1.58742e-36
	TUBA1C	19941.7	7922.71	0.39998	-1.322	7.36143e-38	2.07721e-36
	MOSPD1	803.438	2828.8	3.49967	1.80722	7.4298e-38	2.09244e-36
	SSPO	304.171	1500.75	4.81848	2.26858	8.80928e-38	2.47614e-36
	KHK	947.855	97.6911	0.109978	-3.18472	1.0289e-37	2.88648e-36
	TRA2B	9861.26	3872.83	0.394596	-1.34155	1.15574e-37	3.23608e-36
	TES	1642.38	4765.66	2.87818	1.52516	1.266e-37	3.53798e-36
	XRCC2	805.19	84.4335	0.111865	-3.16017	1.29995e-37	3.62589e-36
	FAM84A	101.561	879.565	8.16834	3.03004	1.59064e-37	4.42821e-36
	TRAK1	1074.09	3477.28	3.19877	1.67752	1.67889e-37	4.66495e-36
	C1orf233	2037.23	498.742	0.248719	-2.00741	1.79695e-37	4.98344e-36
	TMEM68	584.932	2523.44	4.19738	2.06949	1.87162e-37	5.18065e-36
	NINJ1	5533.23	13828	2.48831	1.31517	1.88794e-37	5.21589e-36
	SLC12A4	89.3249	3698.71	31.133	4.96037	2.13735e-37	5.89373e-36
	MSX2	1970.55	5609.41	2.8288	1.50019	2.28608e-37	6.2919e-36
	RFC5	3036.65	901.496	0.300007	-1.73693	2.62814e-37	7.21969e-36
	PGAM5	4760.43	1613.45	0.342471	-1.54595	3.52774e-37	9.67267e-36
	NEDD9	658.692	2438.83	3.63362	1.86141	3.59822e-37	9.84732e-36
	TUBB4B	34289.1	13978.6	0.410935	-1.28302	6.2959e-37	1.71977e-35
	BTBD11	146.468	1013.51	6.60916	2.72447	6.32508e-37	1.7245e-35
	IL4R	2362.63	6380.05	2.68925	1.4272	6.34943e-37	1.7279e-35
	MUC16	125.295	925.088	7.0849	2.82475	6.70659e-37	1.82168e-35
	MYO19	3696.13	1194.49	0.326105	-1.61659	7.36751e-37	1.99748e-35
	DTYMK	3623.19	987.473	0.273046	-1.87279	9.66078e-37	2.61435e-35
	PRIM1	1354.45	247.409	0.187523	-2.41486	1.04055e-36	2.80713e-35
	TXNIP	2236.24	6202.69	2.75942	1.46436	1.04118e-36	2.80713e-35
	KIAA1751	4.72195	398.666	48.8369	5.6099	1.05527e-36	2.83984e-35
	COL4A5	767.496	3092.1	3.99302	1.99748	1.14085e-36	3.06447e-35
	ZNF767P	829.927	3054.8	3.61257	1.85303	1.15225e-36	3.08938e-35
	PLXNB1	6002.23	14684.8	2.43671	1.28494	1.32762e-36	3.55304e-35
	SIVA1	5634.85	1914.25	0.342257	-1.54685	1.49627e-36	3.99703e-35
	STIL	1362.72	238.964	0.180737	-2.46803	1.64594e-36	4.38877e-35
	IFFO2	798.053	2716.26	3.36359	1.75	2.45005e-36	6.5209e-35
	ZNF79	257.124	1326.67	5.00969	2.32472	3.92454e-36	1.04262e-34
	CALCOCO1	708.316	2524.79	3.51885	1.8151	4.05199e-36	1.07452e-34
	PVT1	1088.59	3402.38	3.09736	1.63104	4.148e-36	1.09797e-34
	TEAD4	798.837	91.3818	0.121893	-3.03632	4.43058e-36	1.17064e-34
	GLB1L2	1715.07	312.017	0.187077	-2.4183	5.00497e-36	1.32e-34
	PTPRU	4857.39	11906.2	2.43777	1.28556	5.56841e-36	1.46594e-34
	ATF3	80.9213	737.756	8.51753	3.09044	6.74132e-36	1.77152e-34
	CCNF	3505.15	1008.8	0.291476	-1.77855	8.07905e-36	2.11922e-34
	MALAT1	29606.1	86139	2.8649	1.51849	8.20644e-36	2.14876e-34
	RBL1	1145.01	179.525	0.16355	-2.61219	8.30832e-36	2.17152e-34
	ZNF217	12789	29004.9	2.26259	1.17798	8.62585e-36	2.25046e-34
	RBBP7	11144.4	4574.04	0.412364	-1.27801	8.67055e-36	2.25807e-34
	TEP1	1426.81	4244.36	2.94893	1.56019	1.31313e-35	3.41366e-34
	SGOL2	1214.31	214.501	0.182926	-2.45066	1.32516e-35	3.43879e-34
	SPATS2L	3240.84	8209.86	2.52512	1.33635	1.66704e-35	4.31826e-34
	SLC2A1	6555.1	15403.7	2.34325	1.22851	1.80255e-35	4.66098e-34
	SLC39A8	1523.3	282.427	0.19012	-2.39502	1.81297e-35	4.6796e-34
	RGS20	13.8248	491.479	26.753	4.74163	1.92597e-35	4.96244e-34
	TYRO3	1142.54	193.163	0.175229	-2.51269	1.96148e-35	5.04499e-34
	LMNB2	6579.94	2391.16	0.363432	-1.46024	3.22633e-35	8.28356e-34
	ABCB6	2035.22	5664.8	2.76942	1.46959	4.05487e-35	1.03925e-33
	CAPN8	464.515	1849.76	3.91772	1.97002	4.43993e-35	1.13593e-33
	MIS18BP1	1936.22	493.147	0.258933	-1.94935	4.78595e-35	1.22231e-33
	STX1B	54.2396	652.544	10.8079	3.43401	5.91436e-35	1.50785e-33
	RFWD3	4903.66	1719.08	0.352201	-1.50553	7.60494e-35	1.93546e-33
	SGOL1	806.959	61.1944	0.0822394	-3.60403	8.17042e-35	2.07574e-33
	BRI3BP	1879.15	467.225	0.253117	-1.98212	8.2652e-35	2.09616e-33
	FLJ16779	1.32812	345.238	81.431	6.34751	9.04123e-35	2.28897e-33
	CLMN	838.725	2847.12	3.34144	1.74047	1.01525e-34	2.56584e-33
	LOC100507053	13.3728	443.556	25.2934	4.66069	1.23675e-34	3.12021e-33
	CENPJ	1753.63	421.628	0.244697	-2.03093	1.25991e-34	3.17313e-33
	SARS	10214.9	23085	2.25361	1.17224	1.40653e-34	3.53628e-33
	NXT1	1804.52	418.402	0.236689	-2.07893	1.50129e-34	3.76802e-33
	TRIM29	106.718	814.66	7.24371	2.85673	1.62249e-34	4.06517e-33
	KIF24	643.497	52.5704	0.0899793	-3.47426	2.12665e-34	5.31918e-33
	C19orf83	26.5708	492.022	15.7523	3.97749	2.27288e-34	5.67518e-33
	HAUS8	951.534	121.101	0.135463	-2.88403	2.88096e-34	7.18116e-33
	LMNA	10585.4	23744.6	2.23566	1.1607	3.17151e-34	7.89184e-33
	ABAT	3782.71	9693.79	2.5598	1.35603	3.60734e-34	8.961e-33
	FKBP4	18320.5	7984.82	0.437042	-1.19415	4.55314e-34	1.12912e-32
	XRCC3	2697.8	808.448	0.302735	-1.72387	5.00227e-34	1.23838e-32
	DCLRE1B	5278.07	1957.85	0.373161	-1.42213	5.48171e-34	1.35477e-32
	NOS3	25.7416	473.324	15.6924	3.972	7.75174e-34	1.91254e-32
	SRM	5592.88	2109.56	0.379319	-1.39852	9.60663e-34	2.36616e-32
	LCE1E	0	338.035	119.094	6.89595	1.11863e-33	2.75058e-32
	PITPNM1	636.3	2250.84	3.49889	1.8069	1.36419e-33	3.34873e-32
	RIN1	119.961	859.351	6.81599	2.76892	1.38898e-33	3.40383e-32
	PSCA	131.185	989.025	7.12406	2.8327	1.70906e-33	4.18115e-32
	NCL	26630.6	9909.63	0.368474	-1.44037	1.79417e-33	4.38199e-32
	CD59	5122.57	12317.3	2.37991	1.25091	1.89454e-33	4.61658e-32
	MYC	5273.23	1907.83	0.361927	-1.46623	1.89657e-33	4.61658e-32
	FAM198B	359.453	1531.62	4.17502	2.06178	1.93215e-33	4.69532e-32
	RAD51AP1	546.623	36.3672	0.0761211	-3.71556	2.10913e-33	5.11685e-32
	MRPS34	6351.42	2382.64	0.376074	-1.41091	2.16653e-33	5.24734e-32
	NGFR	33.5525	500.68	13.0838	3.7097	2.3283e-33	5.62976e-32
	LCOR	662.139	2329.3	3.47811	1.79831	2.53849e-33	6.1278e-32
	HLA-DOA	0.424229	326.344	98.8079	6.62655	3.34094e-33	8.05149e-32
	XPR1	2352.42	6033.47	2.54949	1.35021	4.04644e-33	9.73557e-32
	AIF1L	5258.79	1849.17	0.354692	-1.49536	4.32579e-33	1.03905e-31
	SLC19A1	2978.94	891.862	0.301641	-1.7291	4.72772e-33	1.13372e-31
	TSPAN1	444	1769.53	3.92638	1.9732	5.05491e-33	1.21018e-31
	ZFP36L1	4083.76	10156.7	2.48361	1.31244	5.26924e-33	1.25942e-31
	ARHGAP33	896.227	130.269	0.151849	-2.71929	5.84049e-33	1.39366e-31
	RABGGTA	1668	4626.16	2.74575	1.4572	6.03227e-33	1.43706e-31
	EI24	6435.14	14745.3	2.28022	1.18917	6.05273e-33	1.43958e-31
	PODXL2	3808.76	1296	0.343198	-1.54289	6.1845e-33	1.46852e-31
	NFATC4	146.956	951.284	6.20279	2.63292	6.81975e-33	1.61671e-31
	NUDC	3973.45	1406.95	0.35665	-1.48742	7.61159e-33	1.80149e-31
	IFRD2	3352.61	1130.91	0.34012	-1.55588	7.7948e-33	1.84185e-31
	POLA1	2006.11	548.947	0.277219	-1.8509	1.14414e-32	2.69913e-31
	RNF26	3710.5	1297.1	0.35251	-1.50426	1.25092e-32	2.94624e-31
	ANK3	1886.2	5298.56	2.78014	1.47516	1.36494e-32	3.20959e-31
	FJX1	1248.51	247.154	0.202792	-2.30193	1.37731e-32	3.23346e-31
	PCDH1	2533.94	6808.09	2.67293	1.41842	1.41556e-32	3.31788e-31
	KPNB1	15250.5	6556.36	0.43047	-1.21602	1.7309e-32	4.05048e-31
	HSPH1	12382.2	5385.84	0.436316	-1.19655	3.66571e-32	8.56432e-31
	HIF1A	5234.01	12895.4	2.4492	1.29231	4.46503e-32	1.04107e-30
	PSMC3IP	755.012	94.9166	0.13379	-2.90196	4.47032e-32	1.04107e-30
	PGRMC1	6682.42	2600.89	0.392833	-1.34801	4.8117e-32	1.11878e-30
	CASK	2761.75	7386.57	2.6214	1.39034	5.43935e-32	1.26269e-30
	PTTG1	1529.89	298.65	0.202108	-2.3068	6.76431e-32	1.56777e-30
	RASEF	1474.51	4042.96	2.72146	1.44438	7.45447e-32	1.72497e-30
	MIR3189	7.51676	335.832	30.4078	4.92637	8.24525e-32	1.90493e-30
	FGFRL1	2841.11	855.472	0.302873	-1.72322	8.89763e-32	2.05239e-30
	SMC1A	7232.12	2668.54	0.368972	-1.43842	9.5785e-32	2.20594e-30
	REV3L	1734.81	4586.93	2.62539	1.39253	1.51245e-31	3.47769e-30
	SLC35D1	810.202	2579.63	3.14275	1.65203	1.57388e-31	3.61321e-30
	MSH2	2496.91	773.568	0.313514	-1.6734	1.58934e-31	3.64294e-30
	OSBPL3	24.017	444.995	15.6637	3.96935	1.61855e-31	3.70407e-30
	LRP3	4003.95	1457.55	0.366566	-1.44785	1.80431e-31	4.12268e-30
	RIOK3	1221.41	3708.93	3.00083	1.58536	2.35868e-31	5.3809e-30
	TMEM253	11.8422	353.957	22.6305	4.5002	2.67243e-31	6.08712e-30
	DSN1	1513.64	366.664	0.247381	-2.01519	3.23964e-31	7.36752e-30
	FANCD2	3228.31	1029.58	0.320379	-1.64215	3.62316e-31	8.22683e-30
	SHC4	11.612	392.877	25.1483	4.65239	3.78061e-31	8.57096e-30
	PLK2	7136.19	15919.5	2.2227	1.15231	4.27799e-31	9.68345e-30
	DUSP13	8.30978	336.709	28.0401	4.80942	4.38645e-31	9.91352e-30
	TSEN54	5944.28	2387.8	0.403959	-1.30772	4.50186e-31	1.01586e-29
	ECT2	3605.19	1286.08	0.359772	-1.47485	6.73617e-31	1.51767e-29
	MLPH	15237.4	33021.7	2.16179	1.11222	8.42497e-31	1.89523e-29
	MCMBP	4170.45	1484.82	0.358722	-1.47906	1.01344e-30	2.27624e-29
	IL1RN	30.4635	461.921	12.9121	3.69066	1.09787e-30	2.46208e-29
	BCL10	429.297	1657.33	3.78146	1.91894	1.18262e-30	2.64806e-29
	SRSF2	14563.1	6441.22	0.443322	-1.17357	1.23147e-30	2.75319e-29
	FIGNL1	1525.27	379.583	0.254045	-1.97684	1.417e-30	3.16312e-29
	CDC25C	639.966	67.257	0.113353	-3.14111	1.49432e-30	3.3306e-29
	SPDL1	1421.43	281.412	0.201939	-2.30801	1.54234e-30	3.43235e-29
	CUEDC1	2822.61	6900.62	2.43375	1.28318	1.59119e-30	3.53565e-29
	PDLIM1	1710.71	4461.01	2.5904	1.37318	1.72688e-30	3.8313e-29
	SLC29A1	3137.18	1086.44	0.349448	-1.51685	1.76275e-30	3.90492e-29
	NACC2	3118.56	7743.11	2.4738	1.30673	1.85885e-30	4.11153e-29
	NUP85	4205.97	1541.27	0.368912	-1.43865	1.90581e-30	4.20901e-29
	USP1	2689.11	860.471	0.322914	-1.63078	2.09763e-30	4.6256e-29
	GRB7	468.384	1722	3.61687	1.85474	2.14706e-30	4.72743e-29
	TFDP1	3549.39	1263.1	0.359079	-1.47763	2.22646e-30	4.89484e-29
	LPIN3	2285.11	5670.27	2.46552	1.30189	2.52289e-30	5.53816e-29
	MXD4	1718.4	4467.47	2.58326	1.36919	2.65947e-30	5.82917e-29
	TMTC3	1388.13	3943.29	2.82828	1.49992	2.89731e-30	6.34093e-29
	PLEKHO1	1816.8	491.212	0.275162	-1.86165	3.01577e-30	6.59024e-29
	CDKN2C	587.549	58.633	0.109236	-3.19448	3.43462e-30	7.48303e-29
	CENPL	855.206	136.21	0.166932	-2.58267	3.42969e-30	7.48303e-29
	KDM6B	2114.7	5312.11	2.49631	1.3198	3.75372e-30	8.16603e-29
	INPP1	76.0053	652.946	7.96066	2.99289	4.48416e-30	9.74047e-29
	CELF3	18.7961	381.267	16.5601	4.04964	5.51427e-30	1.19602e-28
	PLCD3	4244.05	9645.56	2.26304	1.17826	6.03663e-30	1.30737e-28
	PIK3R3	2171.8	5920.19	2.70258	1.43434	7.37651e-30	1.59517e-28
	SMAD5	1942.95	5040.37	2.57148	1.3626	7.88797e-30	1.70324e-28
	MRTO4	3506.44	1123.02	0.322243	-1.63378	8.06238e-30	1.73832e-28
	RIC3	0.876173	275.837	72.4741	6.17939	8.09762e-30	1.74333e-28
	NABP1	341.682	1411.29	4.01934	2.00696	8.2196e-30	1.76697e-28
	FLYWCH1	2551.59	6886.89	2.65087	1.40647	8.61611e-30	1.84947e-28
	ALG1L	254.143	1222.44	4.68588	2.22832	8.78055e-30	1.88199e-28
	SLC38A2	12208.7	25747.5	2.10491	1.07376	9.10104e-30	1.94781e-28
	POLR3K	2266.06	688.595	0.307605	-1.70085	9.24987e-30	1.97675e-28
	GALNT11	1387.98	3738.91	2.67266	1.41828	9.28298e-30	1.98092e-28
	PCNP	2830.17	6815.82	2.39434	1.25963	9.49109e-30	2.02235e-28
	SHANK2	1096.4	3109.36	2.81228	1.49174	1.16355e-29	2.47566e-28
	GRHL3	774.946	2420.43	3.07813	1.62206	1.20648e-29	2.56324e-28
	CBX3	9082.88	3913.8	0.432078	-1.21064	1.23307e-29	2.61591e-28
	SAT1	483.249	1800.72	3.66033	1.87197	1.28409e-29	2.72018e-28
	BTG1	2446.28	5963.71	2.42076	1.27546	1.29915e-29	2.74807e-28
	IMPA2	1384.32	302.173	0.2243	-2.1565	1.39284e-29	2.94198e-28
	AHDC1	1511.78	4175.64	2.7293	1.44853	1.52873e-29	3.22431e-28
	SSRP1	8574.49	3417.17	0.396919	-1.33308	1.75528e-29	3.69677e-28
	CFLAR	557.629	1977.78	3.50035	1.8075	1.78565e-29	3.7553e-28
	E2F8	773.618	73.5824	0.104706	-3.25559	1.92417e-29	4.03493e-28
	VANGL2	19.4506	415.695	17.3061	4.11321	1.92332e-29	4.03493e-28
	C16orf59	1075.55	161.326	0.154909	-2.69051	2.08912e-29	4.3745e-28
	BEND3	690.558	90.0323	0.138992	-2.84693	2.30309e-29	4.81561e-28
	PSMG3-AS1	1172.81	3252.28	2.75012	1.45949	2.70931e-29	5.65685e-28
	KLRG2	102.715	728.924	6.66492	2.73659	2.99629e-29	6.24706e-28
	DBF4B	997.807	188.86	0.195495	-2.3548	3.38235e-29	7.04188e-28
	KLHL30	2.99732	282.807	45.3217	5.50213	3.59758e-29	7.47926e-28
	CTNNAL1	1070.59	210.582	0.203067	-2.29997	3.64267e-29	7.56218e-28
	CHTF18	3746.39	1200.05	0.318396	-1.65111	3.98806e-29	8.26741e-28
	TOMM5	3502.52	1286.64	0.370153	-1.43381	3.99619e-29	8.27246e-28
	SNAI2	134.995	821.638	5.81484	2.53974	4.06618e-29	8.40536e-28
	DNMBP	1075.05	3033.46	2.79629	1.48352	4.23195e-29	8.73562e-28
	PHLDA1	857.965	2561.84	2.95491	1.56312	4.55314e-29	9.38529e-28
	MR1	658.795	2221.16	3.35298	1.74544	5.45621e-29	1.12308e-27
	SNRPB	12494.1	5702.15	0.458285	-1.12568	5.48233e-29	1.12686e-27
	PPP1R10	3008.17	7152.57	2.37573	1.24837	5.90272e-29	1.21156e-27
	POLE2	529.289	44.6191	0.0948694	-3.39791	6.25476e-29	1.282e-27
	YPEL2	544.413	2101.33	3.83364	1.93872	6.72904e-29	1.37727e-27
	MTFR2	531.302	49.3322	0.103149	-3.2772	8.10145e-29	1.65584e-27
	SLC12A6	469.279	1765.3	3.6596	1.87169	8.20113e-29	1.67386e-27
	GSG2	411.225	20.6655	0.0614656	-4.02408	8.35674e-29	1.70323e-27
	PIK3IP1	119.991	849.67	6.7593	2.75687	9.12535e-29	1.85728e-27
	KIF18A	633.174	73.0728	0.125134	-2.99845	1.02777e-28	2.08888e-27
	IRF2BP2	3353.22	7700.14	2.28695	1.19343	1.0795e-28	2.19097e-27
	VGF	1995.64	582.25	0.293665	-1.76776	1.13158e-28	2.29347e-27
	PARD6B	3133.14	7260.37	2.30802	1.20666	1.13429e-28	2.29575e-27
	PSME4	3091.11	7172.47	2.30976	1.20774	1.14488e-28	2.31396e-27
	FLJ26850	18.3911	554.608	23.1144	4.53072	1.1568e-28	2.33481e-27
	RRS1	2589.84	859.101	0.333278	-1.5852	1.28907e-28	2.59817e-27
	TAB3	1180.82	3232.86	2.71554	1.44124	1.35263e-28	2.7225e-27
	PPP1R3B	291.062	1340.35	4.4942	2.16807	1.37559e-28	2.76488e-27
	MYLK	70.8229	608.783	7.98238	2.99682	1.41565e-28	2.84147e-27
	GEMIN4	3269.82	1193.08	0.367785	-1.44306	1.46373e-28	2.93392e-27
	KLHL12	1971.44	4871.3	2.45669	1.29671	1.49959e-28	3.00166e-27
	IDS	4942.09	11540.2	2.30216	1.20299	1.60362e-28	3.20548e-27
	NOTCH3	10839.4	22757.7	2.09055	1.06388	1.75092e-28	3.49512e-27
	PAPSS2	2070.11	5075.34	2.44232	1.28825	1.88547e-28	3.75853e-27
	SLC18A2	0.848458	272.207	69.1831	6.11235	1.94748e-28	3.87682e-27
	MPZL2	1686.78	4718.54	2.72431	1.44589	2.02444e-28	4.02452e-27
	PSIP1	1900.2	531.06	0.283069	-1.82077	2.02849e-28	4.02705e-27
	IVNS1ABP	4904.11	1982.19	0.406873	-1.29735	2.49993e-28	4.95621e-27
	FAM129B	15664.4	32193.7	2.04715	1.03362	2.78568e-28	5.51519e-27
	TMPRSS4	811.716	2455.47	2.98381	1.57715	2.80442e-28	5.54475e-27
	UCP2	2407.82	6782.21	2.7541	1.46158	3.32494e-28	6.56495e-27
	SDPR	0.451944	266.453	76.9873	6.26655	3.60237e-28	7.10307e-27
	TNFRSF21	3716.57	8360.77	2.23931	1.16305	3.65449e-28	7.19607e-27
	PUF60	8723.81	3743.9	0.429433	-1.21949	3.72107e-28	7.31726e-27
	DBF4	1160.74	209.906	0.188016	-2.41107	4.11192e-28	8.07492e-27
	SNRNP25	3649.07	1283.64	0.352857	-1.50285	5.21639e-28	1.023e-26
	NCAPH2	2501.2	763.486	0.308346	-1.69738	6.9518e-28	1.3615e-26
	TFAP4	927.234	172.113	0.193494	-2.36964	7.19061e-28	1.40638e-26
	HPRT1	2786.85	892.898	0.325844	-1.61775	7.46318e-28	1.45773e-26
	PRMT6	11062.3	5096.09	0.462456	-1.11261	8.72406e-28	1.70172e-26
	TUBB6	2807.46	6592.43	2.33652	1.22436	9.83364e-28	1.91558e-26
	NFAT5	1560.1	4311.41	2.74546	1.45705	1.04873e-27	2.04018e-26
	PES1	5563.69	2327.54	0.420329	-1.25041	1.26599e-27	2.45953e-26
	IER3	3002.79	8122.67	2.65023	1.40612	1.28161e-27	2.48657e-26
	GADD45G	189.567	946.985	4.82597	2.27082	1.39589e-27	2.70468e-26
	DNA2	1028.67	214.961	0.215602	-2.21356	1.51964e-27	2.94054e-26
	YPEL5	1006.22	2814.24	2.76968	1.46972	1.62273e-27	3.13585e-26
	CDCA4	2880.04	936.279	0.328119	-1.60771	1.653e-27	3.1901e-26
	RFX7	1000.24	2794.84	2.76931	1.46953	2.04609e-27	3.94347e-26
	SASH1	807.055	2381.58	2.91943	1.54569	2.24847e-27	4.32777e-26
	RGAG4	116.309	736.874	6.00765	2.5868	2.26531e-27	4.35443e-26
	C10orf2	2039.95	639.945	0.316779	-1.65845	2.43882e-27	4.68176e-26
	F8	70.7206	585.844	7.65699	2.93678	3.1257e-27	5.98995e-26
	HDGF	26881	13166.7	0.491656	-1.02428	3.12852e-27	5.98995e-26
	ASPG	3.56012	263.131	38.5402	5.26829	3.33524e-27	6.37734e-26
	LYAR	1279.73	313.166	0.250782	-1.9955	3.36638e-27	6.42842e-26
	TMEM106C	6936.81	2714.47	0.391579	-1.35262	3.38607e-27	6.45752e-26
	CAPN1	9787.69	20197.7	2.0566	1.04026	3.69269e-27	7.03305e-26
	S100A11	16518.2	42286.2	2.48848	1.31527	3.92647e-27	7.46852e-26
	KCNJ3	1567.58	373.341	0.242542	-2.0437	4.58886e-27	8.71703e-26
	EFNB1	719.818	2196.03	3.01058	1.59004	4.81433e-27	9.1334e-26
	KIAA1683	46.4372	509.877	9.7193	3.28085	4.91329e-27	9.30899e-26
	ATXN1	784.328	2331.85	2.94242	1.557	4.99819e-27	9.45752e-26
	BARD1	947.872	128.623	0.142488	-2.81108	5.16561e-27	9.75525e-26
	SLC43A2	1824.74	4535.61	2.46676	1.30262	5.16897e-27	9.75525e-26
	DDX23	8137.11	3533.79	0.433905	-1.20455	5.56693e-27	1.0472e-25
	LRP8	3436.88	1292.03	0.379638	-1.39731	5.56351e-27	1.0472e-25
	PPP1R16A	2834.03	988.968	0.351218	-1.50956	5.57039e-27	1.0472e-25
	RHCG	39.2892	496.843	10.9184	3.44869	6.06895e-27	1.13946e-25
	NOC2L	6690.37	2894.75	0.434144	-1.20375	6.08705e-27	1.14138e-25
	TRAIP	804.107	139.11	0.181494	-2.46201	8.09887e-27	1.51666e-25
	TYMSOS	163.586	872.775	5.13118	2.35929	8.23451e-27	1.54008e-25
	CD109	442.843	1563.83	3.50097	1.80776	8.90248e-27	1.66286e-25
	DUT	2225.28	662.719	0.301302	-1.73072	9.5411e-27	1.77986e-25
	VPS13C	996.782	3003.84	2.97684	1.57378	9.70603e-27	1.80831e-25
	CLN6	4875.55	2009.54	0.414392	-1.27093	9.87494e-27	1.83742e-25
	MRPL12	4501.21	1849.08	0.413202	-1.27508	1.14243e-26	2.12299e-25
	NDC1	3093.89	1098.54	0.357649	-1.48338	1.26173e-26	2.34169e-25
	ATAD3A	1558.15	441.629	0.288403	-1.79384	1.43845e-26	2.66627e-25
	RIT1	769.425	2360.48	3.02717	1.59797	1.45569e-26	2.69479e-25
	POLE3	5564.49	2388.01	0.431453	-1.21272	1.58114e-26	2.92331e-25
	PCLO	276.657	1150.32	4.05422	2.01942	1.66357e-26	3.07179e-25
	GRWD1	3773.23	1493.19	0.398549	-1.32717	1.67646e-26	3.09167e-25
	IP6K2	2442.56	5655.22	2.30352	1.20384	1.75127e-26	3.22553e-25
	HNRNPR	7254.26	3249.8	0.449878	-1.15239	1.81036e-26	3.33014e-25
	KCTD11	987.153	2721.54	2.73233	1.45013	1.89785e-26	3.48667e-25
	FLG-AS1	0	227.938	79.1913	6.30727	1.95803e-26	3.59269e-25
	SEC31A	4039.03	9415.76	2.32086	1.21466	1.97662e-26	3.6209e-25
	ZNF423	42.5999	461.907	9.68298	3.27545	1.97839e-26	3.6209e-25
	RALGAPB	2548.57	5859.08	2.28732	1.19366	1.98623e-26	3.63067e-25
	GLA	3901.88	1559.52	0.402443	-1.31314	2.02911e-26	3.7044e-25
	MAZ	20290.3	9929.05	0.490535	-1.02757	2.39658e-26	4.36977e-25
	FARSA	5411.74	2253.53	0.418087	-1.25813	2.4284e-26	4.42225e-25
	CBX5	4823.41	1753.38	0.361594	-1.46756	2.4711e-26	4.49437e-25
	CAD	6343.66	2744.64	0.436367	-1.19639	2.51135e-26	4.56187e-25
	F11R	7973.37	16483	2.06338	1.04501	2.64511e-26	4.79884e-25
	PPRC1	3528.86	1365.23	0.390717	-1.3558	2.68373e-26	4.86283e-25
	KDM5B	6587.91	13734.1	2.07723	1.05466	3.00778e-26	5.44321e-25
	E2F7	1190.49	3133.58	2.61104	1.38462	3.05695e-26	5.52532e-25
	TANC1	1291.59	3373.61	2.58637	1.37093	3.3074e-26	5.97058e-25
	PLD1	143.304	810.707	5.40102	2.43323	3.46114e-26	6.24036e-25
	PLIN4	40.1739	531.795	11.5771	3.5332	3.66765e-26	6.60449e-25
	GPRC5B	415.632	25.0443	0.0732181	-3.77166	3.76618e-26	6.77354e-25
	CELSR2	41713	81417	1.94642	0.96082	3.9987e-26	7.18284e-25
	PASK	2078.81	667.107	0.324754	-1.62258	5.74043e-26	1.02988e-24
	PADI3	121.381	734.541	5.69	2.50843	5.89216e-26	1.05579e-24
	PRPF4	4050.44	1644.7	0.408007	-1.29334	5.93153e-26	1.06154e-24
	COLGALT1	3319.71	1284.82	0.39004	-1.35831	7.0827e-26	1.266e-24
	EPS8L1	1214.4	3181.46	2.60624	1.38197	7.30544e-26	1.30421e-24
	CEACAM1	6.58515	263.796	25.9897	4.69987	8.08901e-26	1.44233e-24
	FER1L4	2660.27	6028.06	2.25361	1.17224	9.02079e-26	1.6065e-24
	PPP1R13L	1365.15	3615.1	2.63109	1.39566	9.38227e-26	1.66883e-24
	GPC1	3986.76	8633.75	2.15564	1.10812	9.70012e-26	1.72325e-24
	KSR1	251.285	1111.13	4.24919	2.08719	1.07536e-25	1.90807e-24
	AHR	837.045	2402.11	2.84231	1.50707	1.08731e-25	1.92692e-24
	HPDL	529.104	54.4632	0.113029	-3.14523	1.10136e-25	1.94945e-24
	CARHSP1	3753.35	1465	0.392701	-1.3485	1.43772e-25	2.54173e-24
	SEPHS1	5014.33	2150.3	0.43088	-1.21464	1.44551e-25	2.5524e-24
	ALDH1L1	0.876173	221.149	57.3777	5.84242	1.60408e-25	2.82894e-24
	MVP	229.496	1054.9	4.51728	2.17545	1.63054e-25	2.87212e-24
	MED22	3887.66	1576.31	0.408269	-1.29241	1.65903e-25	2.91877e-24
	FBXO44	868.104	2436.52	2.7809	1.47555	1.67464e-25	2.94267e-24
	SMPD4	4009.95	1644.31	0.412616	-1.27713	1.96002e-25	3.43997e-24
	MYO5A	2543.79	5760.2	2.25308	1.1719	1.98575e-25	3.48092e-24
	GAMT	180.76	897.669	4.80951	2.26589	2.4125e-25	4.22391e-24
	CCDC51	677.618	2204.06	3.20921	1.68222	2.42086e-25	4.23345e-24
	PYCR1	5983.82	2642.26	0.441984	-1.17793	2.62626e-25	4.58711e-24
	PGAP1	446.044	1563.96	3.4382	1.78165	2.80451e-25	4.89258e-24
	TMEM2	1367.03	3651.67	2.66383	1.4135	2.95355e-25	5.14641e-24
	LOXL3	397.816	26.3897	0.0786328	-3.66872	3.00256e-25	5.22554e-24
	RUSC1	4714.83	1744.22	0.371751	-1.42759	3.16075e-25	5.49425e-24
	CENPI	808.004	115.72	0.151522	-2.7224	3.49614e-25	6.06999e-24
	ANP32B	10481.4	4982.42	0.476419	-1.0697	3.50651e-25	6.08074e-24
	HSPD1	12160.2	5759.17	0.474359	-1.07595	3.71848e-25	6.44064e-24
	CERK	1188.69	290.93	0.249905	-2.00055	3.80444e-25	6.58168e-24
	FAM84B	6692.41	13691.7	2.03862	1.02759	3.85731e-25	6.66521e-24
	RND3	1739.04	4330.03	2.46997	1.30449	4.11571e-25	7.10326e-24
	COL6A3	35.6929	410.881	10.1076	3.33736	4.18418e-25	7.21288e-24
	PRPF19	7531.27	3470.39	0.462516	-1.11242	4.37687e-25	7.5361e-24
	SH3BP1	1082.31	227.771	0.216546	-2.20725	4.58678e-25	7.88817e-24
	STRA13	5275.34	2261.52	0.430483	-1.21597	4.78944e-25	8.22697e-24
	P2RY2	4426.93	9382.58	2.10833	1.0761	4.90576e-25	8.41682e-24
	KIFC3	207.433	1127.87	5.2311	2.38712	4.96629e-25	8.51062e-24
	LAMA3	381.984	1524.76	3.86383	1.95003	5.0277e-25	8.60571e-24
	NUP107	4558.53	1937.57	0.427381	-1.22641	5.85145e-25	1.00039e-23
	MRPL4	4958.67	2146.13	0.435107	-1.20056	6.04685e-25	1.03258e-23
	CENPA	1152.84	203.863	0.184909	-2.43511	6.41636e-25	1.0944e-23
	RAD54B	1289.94	327.697	0.25937	-1.94692	6.72206e-25	1.14519e-23
	PTMA	11253.5	5402.32	0.481383	-1.05474	8.06646e-25	1.37262e-23
	RBMS1	870.958	2837.38	3.18143	1.66968	8.96224e-25	1.52327e-23
	SMEK1	3700.91	7953.13	2.13939	1.0972	9.9813e-25	1.69449e-23
	SYT1	508.632	1641.28	3.17652	1.66745	1.06837e-24	1.81161e-23
	PUS1	3946.18	1637.7	0.417755	-1.25927	1.08613e-24	1.83958e-23
	PCDH10	854.925	162.094	0.197975	-2.33661	1.09153e-24	1.84659e-23
	CD24	24676.4	56137.7	2.21274	1.14583	1.21689e-24	2.05626e-23
	SNRPD1	2480.37	897.611	0.365554	-1.45185	1.34528e-24	2.27057e-23
	CD320	1614.3	414.413	0.258825	-1.94995	1.42567e-24	2.40346e-23
	DOCK8	718.014	2085.33	2.87594	1.52404	1.52595e-24	2.56953e-23
	CHRNA5	1834.4	480.222	0.262491	-1.92966	1.56728e-24	2.63608e-23
	RPP25	762.805	131.071	0.18038	-2.47089	1.67913e-24	2.82093e-23
	ZFC3H1	2354.51	5382.89	2.27167	1.18375	1.71295e-24	2.87443e-23
	NCAPD2	5972.45	2473.06	0.421559	-1.2462	1.76236e-24	2.95393e-23
	FMN1	786.032	2304.67	2.90872	1.54039	2.05889e-24	3.44698e-23
	RHBDF2	2037.34	4715.51	2.29925	1.20116	2.45211e-24	4.10059e-23
	NTMT1	4023.94	1648.45	0.411101	-1.28244	2.5086e-24	4.19023e-23
	CGNL1	53.1694	481.661	8.20896	3.0372	2.5839e-24	4.31105e-23
	NRM	1031.68	227.922	0.227615	-2.13534	2.86873e-24	4.78078e-23
	VMP1	23196.2	46001.7	1.96238	0.972605	2.88017e-24	4.79434e-23
	POP7	3179.53	1262.05	0.399987	-1.32198	3.26061e-24	5.42142e-23
	PYCRL	1737.03	540.085	0.316353	-1.66039	4.18709e-24	6.95392e-23
	TNFRSF10A	406.508	1477.32	3.55699	1.83066	4.44049e-24	7.36635e-23
	KIAA0430	1456.66	3554.34	2.42634	1.27878	4.96273e-24	8.2233e-23
	RRP1	3865.48	1497.2	0.387616	-1.3673	5.38145e-24	8.90697e-23
	NUP155	2691.15	995.666	0.37258	-1.42438	5.84819e-24	9.66847e-23
	MCM8	1227.54	330.247	0.274691	-1.86412	5.86682e-24	9.68825e-23
	GDPD5	201.39	901.81	4.33359	2.11556	7.0386e-24	1.16101e-22
	SNX29	1054.84	2767.94	2.60196	1.3796	7.22051e-24	1.18966e-22
	ENC1	1127.69	2900.75	2.54948	1.3502	7.71988e-24	1.2705e-22
	MTA2	8365.24	17442.5	2.07879	1.05575	8.17358e-24	1.34365e-22
	RUVBL2	6541.72	3023.88	0.463962	-1.10792	8.23356e-24	1.35198e-22
	ITGB7	83.2918	569.169	6.3874	2.67523	8.66339e-24	1.42095e-22
	LRRC15	52.3679	469.655	8.03214	3.00578	9.14702e-24	1.49859e-22
	FARSB	2841.67	1078.89	0.382564	-1.38623	1.03538e-23	1.69439e-22
	CD46	3597.4	7669.94	2.12919	1.09031	1.0791e-23	1.76395e-22
	ARHGEF39	644.03	93.7842	0.156119	-2.67928	1.11572e-23	1.82176e-22
	MUC5B	4440.21	9276.89	2.07077	1.05017	1.14613e-23	1.86932e-22
	STIP1	14006.9	6964.59	0.499442	-1.00161	1.23689e-23	2.01508e-22
	GINS3	737.123	136.544	0.194442	-2.36259	1.40824e-23	2.29166e-22
	ZBTB2	1835.48	566.958	0.312351	-1.67876	1.48572e-23	2.41504e-22
	PLEKHF2	1580.67	3795.59	2.37858	1.2501	1.73791e-23	2.82182e-22
	SLC9A7	2729.59	6075.28	2.21818	1.14938	1.87816e-23	3.04615e-22
	BTBD19	7.06481	248.01	23.0145	4.52447	1.89987e-23	3.07792e-22
	SKP2	1019.63	247.885	0.249936	-2.00037	1.98918e-23	3.21902e-22
	PTPLAD1	8436.39	3983.82	0.471938	-1.08333	1.99185e-23	3.21975e-22
	SCRIB	8671.83	17872.3	2.04254	1.03036	2.0105e-23	3.24629e-22
	EZH2	3208.5	1210.05	0.37992	-1.39623	2.14934e-23	3.46661e-22
	IPO4	7806.67	3565.46	0.460886	-1.11752	2.17935e-23	3.51112e-22
	BAIAP2L1	1563.82	3824.13	2.42412	1.27746	2.20542e-23	3.5492e-22
	PIM1	1087.64	2823.52	2.57963	1.36716	2.38972e-23	3.84152e-22
	ARL6IP1	13929.5	6598.54	0.472619	-1.08125	2.46872e-23	3.96413e-22
	ZNFX1	3007.94	6493.91	2.14525	1.10115	2.83719e-23	4.55077e-22
	MLLT11	115.267	661.855	5.45071	2.44644	2.87358e-23	4.60407e-22
	C1QBP	9043.27	4368.64	0.485202	-1.04334	2.88324e-23	4.61445e-22
	GABRP	116.062	663.909	5.46349	2.44982	2.89648e-23	4.63055e-22
	SLC52A2	5535.23	2522.27	0.457388	-1.12851	3.05497e-23	4.87856e-22
	CDK4	13716	6830.71	0.499293	-1.00204	3.27443e-23	5.22327e-22
	MAPRE3	895.468	2400.01	2.65652	1.40954	3.30995e-23	5.27415e-22
	IRF2BPL	2589.93	5657.82	2.17365	1.12012	3.50447e-23	5.57798e-22
	PRKDC	16123.1	7634.6	0.470508	-1.08771	3.64652e-23	5.79773e-22
	C1QTNF6	1311.26	3209.57	2.43738	1.28533	4.24027e-23	6.73438e-22
	IRF6	364.119	1284.05	3.4571	1.78956	4.257e-23	6.75357e-22
	KLF16	1609.21	459.775	0.293121	-1.77043	4.65722e-23	7.38044e-22
	CCDC85B	2278.82	820.227	0.362702	-1.46314	5.03484e-23	7.96439e-22
	GMNN	1897.09	652.174	0.348123	-1.52233	5.03666e-23	7.96439e-22
	TOPBP1	3178.43	1154.07	0.362864	-1.4625	5.1997e-23	8.21327e-22
	RPUSD1	3555.58	1478.7	0.418869	-1.25543	5.4007e-23	8.5215e-22
	MFGE8	996.739	2643.13	2.6406	1.40087	5.57614e-23	8.78877e-22
	EIF3B	21495.6	10934.9	0.508762	-0.974938	6.88713e-23	1.08433e-21
	SLC25A19	1068.82	272.462	0.261824	-1.93333	7.095e-23	1.11585e-21
	CCDC60	0	182.801	62.7594	5.97176	7.30315e-23	1.14734e-21
	CALD1	25.0487	375.162	12.4478	3.63782	7.51904e-23	1.17999e-21
	FAM83H	9336.66	18377.4	1.96292	0.973001	7.72244e-23	1.2106e-21
	KRT19	75685.1	144794	1.90323	0.928451	7.9191e-23	1.24009e-21
	GADD45GIP1	2760.47	939.892	0.33783	-1.56563	8.06795e-23	1.26204e-21
	RAB5B	3936.63	8174.84	2.06677	1.04738	8.5332e-23	1.33338e-21
	CEP170B	6862.06	14090.6	2.03966	1.02833	8.93129e-23	1.39409e-21
	RGS12	1583.36	3763.55	2.35848	1.23786	9.44893e-23	1.4733e-21
	EBNA1BP2	5375.93	2410.13	0.450484	-1.15045	9.535e-23	1.48513e-21
	C14orf159	44.0666	415.227	8.40784	3.07174	1.03731e-22	1.61394e-21
	COBLL1	1251.5	3062.56	2.42873	1.28021	1.04699e-22	1.62726e-21
	MIR205HG	37.4537	463.342	10.4215	3.38149	1.07228e-22	1.66478e-21
	TRAP1	14031.1	6814.59	0.484469	-1.04552	1.1547e-22	1.79084e-21
	CKS2	3008.96	1220.92	0.408853	-1.29035	1.1657e-22	1.80597e-21
	GXYLT1	1239.28	3083.72	2.46044	1.29891	1.18937e-22	1.84068e-21
	CCNE1	881.357	199.309	0.23396	-2.09567	1.19241e-22	1.84341e-21
	JPH1	647.62	111.713	0.182302	-2.45559	1.19723e-22	1.84891e-21
	SYNCRIP	11346.3	5670.99	0.501865	-0.99463	1.37942e-22	2.128e-21
	RBBP8	1666.24	537.127	0.326663	-1.61412	1.39653e-22	2.15211e-21
	PSMG1	2629.14	1025.61	0.393667	-1.34495	1.42781e-22	2.19797e-21
	JUP	17504.1	33208	1.8924	0.920215	1.44976e-22	2.22941e-21
	LPP	1317.15	3226.47	2.42748	1.27946	1.45751e-22	2.23896e-21
	ARHGAP23	3.10818	207.649	32.3377	5.01515	1.49396e-22	2.29253e-21
	GTPBP4	7315.28	3505.09	0.480794	-1.05651	1.55792e-22	2.38815e-21
	CCDC137	3527.89	1340.65	0.378871	-1.40022	1.57969e-22	2.41897e-21
	SUPT16H	8597.32	3975.86	0.462304	-1.11309	1.63339e-22	2.49857e-21
	AGPAT5	2129.7	778.026	0.369206	-1.4375	1.63969e-22	2.50557e-21
	PRELID1	6143.51	2875.68	0.470401	-1.08804	1.64936e-22	2.51771e-21
	GJB5	13.991	281.143	15.3241	3.93773	1.72787e-22	2.63478e-21
	ADM2	214.413	921.92	4.15377	2.05442	1.7816e-22	2.71385e-21
	CPEB2	311.77	1190.42	3.69015	1.88368	1.82071e-22	2.77053e-21
	BDKRB2	101.775	609.054	5.62331	2.49142	1.99821e-22	3.03745e-21
	AGPAT2	3709.29	1501.47	0.405792	-1.30119	2.0713e-22	3.14526e-21
	DCLK1	181.359	854.797	4.54525	2.18436	2.10466e-22	3.19258e-21
	MATK	989.99	242.951	0.25221	-1.9873	2.23997e-22	3.3943e-21
	CDC7	685.6	119.083	0.183064	-2.44958	2.46254e-22	3.72767e-21
	EFCAB10	5.68127	222.494	23.941	4.58141	2.68989e-22	4.06758e-21
	ALYREF	6635.8	2871.42	0.434503	-1.20256	2.71711e-22	4.10448e-21
	BRIX1	2503.27	900.574	0.362028	-1.46583	2.72419e-22	4.11089e-21
	HILPDA	2595.95	5712.12	2.18527	1.12781	2.79891e-22	4.21926e-21
	LOXL4	8.73401	245.258	19.2987	4.27043	2.98496e-22	4.49507e-21
	C14orf80	1986.09	712.106	0.362644	-1.46338	3.00582e-22	4.52179e-21
	RBL2	1819.93	4170.04	2.27759	1.18751	3.39944e-22	5.10865e-21
	SMC3	3059.78	1200.29	0.395849	-1.33698	3.45226e-22	5.18267e-21
	MRPS26	3291.08	1324.78	0.404601	-1.30543	3.57171e-22	5.35647e-21
	CENPK	659.754	114.442	0.181961	-2.4583	4.06043e-22	6.08312e-21
	GPR179	1886.8	4482.81	2.34301	1.22836	4.30021e-22	6.43571e-21
	PLXNA2	438.971	1416.09	3.16906	1.66406	4.32705e-22	6.46921e-21
	LHFPL2	988.64	2664.21	2.66906	1.41633	4.42218e-22	6.60463e-21
	GPD1L	2778.33	6021.19	2.15159	1.10541	4.46519e-22	6.66202e-21
	FPGS	3556.59	1438.89	0.407146	-1.29638	4.5067e-22	6.71706e-21
	UBE2S	910.094	211.004	0.23938	-2.06262	4.62719e-22	6.88959e-21
	CBLN3	42.924	463.975	9.53734	3.25359	4.73531e-22	7.04335e-21
	MALL	117.011	758.147	5.88672	2.55746	4.75897e-22	7.0713e-21
	IGFBP5	6092.46	2596.22	0.422349	-1.24349	4.84081e-22	7.18556e-21
	SKA1	266.19	9.17539	0.0505547	-4.30601	4.99013e-22	7.39966e-21
	CDH1	28906.4	55448.8	1.91425	0.936777	5.4673e-22	8.09896e-21
	RACGAP1P	508.564	68.6065	0.145999	-2.77597	5.54941e-22	8.21223e-21
	KIF20A	4627.56	187.61	0.0563161	-4.15031	5.68744e-22	8.40792e-21
	FBXW7	557.401	1654.58	2.92671	1.54928	5.7314e-22	8.4643e-21
	PTDSS1	7411.18	3604.99	0.488525	-1.0335	5.96587e-22	8.80163e-21
	ULK1	12594.9	23841.2	1.88602	0.915346	6.17449e-22	9.10017e-21
	PPT1	6991.54	3380.17	0.485468	-1.04255	6.32641e-22	9.31463e-21
	SORCS2	306.119	1108.96	3.55487	1.8298	6.88109e-22	1.01211e-20
	CARNS1	42.1672	402.442	8.48864	3.08553	7.33476e-22	1.07774e-20
	FGFR4	1012.11	259.847	0.263203	-1.92575	7.66996e-22	1.12586e-20
	CREBRF	204.794	867.022	4.10331	2.03679	8.25183e-22	1.21005e-20
	NODAL	0	170.688	58.2478	5.86413	8.39721e-22	1.23012e-20
	FAM102A	13672.8	25842.1	1.88611	0.915418	9.42839e-22	1.37979e-20
	ZMIZ1	5469.53	10894.1	1.98853	0.991705	9.4625e-22	1.38339e-20
	DFNB31	933.727	2645.54	2.80794	1.48951	9.54878e-22	1.3946e-20
	PRMT1	12106.3	6080.73	0.504817	-0.986167	9.62895e-22	1.4049e-20
	CD55	1310.42	3153.54	2.38618	1.25471	1.06644e-21	1.55442e-20
	GEMIN5	3281.75	1388.69	0.426431	-1.22962	1.09609e-21	1.59603e-20
	RAD21	11101.3	5555.82	0.502744	-0.992104	1.12169e-21	1.63166e-20
	TRMT61A	2289.54	868.112	0.382982	-1.38465	1.1982e-21	1.74123e-20
	CCNK	2740.78	5778.59	2.09833	1.06924	1.25145e-21	1.81679e-20
	RASSF3	1261.29	3038.2	2.38649	1.25489	1.29485e-21	1.87793e-20
	PLEKHG1	87.1184	556.242	5.98204	2.58064	1.36372e-21	1.97583e-20
	FUS	19769	10049.7	0.508477	-0.975747	1.38009e-21	1.99756e-20
	PPP1R26	3679.82	1530.93	0.417307	-1.26082	1.38534e-21	2.00316e-20
	FRMPD2	5.59812	959.954	48.844	5.61011	1.5243e-21	2.2019e-20
	KLLN	61.8288	499.448	7.44648	2.89656	1.63367e-21	2.35755e-20
	HAS3	127.821	666.721	5.00043	2.32205	1.73151e-21	2.49626e-20
	ILF3	23244.5	12059.7	0.519113	-0.945879	1.98001e-21	2.85168e-20
	CCDC86	2596.75	1034.56	0.401211	-1.31757	2.0705e-21	2.97906e-20
	AFF4	3202.74	6652.98	2.06491	1.04608	2.07404e-21	2.9812e-20
	ZMYND19	3324.88	1331.87	0.401185	-1.31766	2.15066e-21	3.08828e-20
	LBR	2554.95	1004.5	0.396485	-1.33466	2.18231e-21	3.13064e-20
	C9orf114	3926.66	1738.87	0.445484	-1.16655	2.23395e-21	3.20155e-20
	PFKFB2	801.928	2135.45	2.63213	1.39623	2.30817e-21	3.30141e-20
	SET	12853.4	6531.15	0.50902	-0.974204	2.30795e-21	3.30141e-20
	SIRT2	1051.82	2678.38	2.51735	1.33191	2.34567e-21	3.35175e-20
	C19orf82	87.3124	542.73	5.82165	2.54143	2.56054e-21	3.65519e-20
	POLR3H	3753.83	1655.87	0.443982	-1.17143	2.60829e-21	3.71969e-20
	HMCES	4294.5	1851.8	0.432829	-1.20813	2.66233e-21	3.79303e-20
	OLFM1	3650.85	1602.4	0.441756	-1.17868	2.79653e-21	3.98034e-20
	FDFT1	4673.09	9280.81	1.97798	0.984026	2.80767e-21	3.99227e-20
	HELLS	1140.64	324.15	0.290505	-1.78336	2.84256e-21	4.03794e-20
	CTPS1	4287.96	1947.49	0.456771	-1.13046	3.19216e-21	4.53013e-20
	BTBD10	994.332	2613.54	2.59923	1.37808	3.29211e-21	4.66741e-20
	FANCC	1253.69	376.733	0.306252	-1.70721	3.47532e-21	4.92235e-20
	GREB1	17579.4	32472.4	1.84203	0.881296	3.67137e-21	5.19497e-20
	HBP1	1283.34	3117.39	2.40112	1.26371	3.70286e-21	5.23443e-20
	DDR1	13257.6	24862.4	1.86684	0.900599	3.70889e-21	5.23786e-20
	GGH	2242.48	864.615	0.389385	-1.36073	4.23643e-21	5.97706e-20
	CLIP1	2728.64	5699.54	2.08024	1.05675	4.36026e-21	6.1458e-20
	PCMTD2	1622.63	3667.33	2.2458	1.16723	4.97671e-21	7.0079e-20
	HSD17B7	391.799	1288.03	3.20978	1.68248	5.59912e-21	7.87672e-20
	STON2	179.338	785.438	4.22568	2.07918	5.81128e-21	8.16727e-20
	EMC8	4187.73	1902.64	0.456821	-1.1303	6.43985e-21	9.04192e-20
	CNTRL	641.03	115.879	0.191911	-2.38149	6.66852e-21	9.35395e-20
	SYTL2	14562.9	29121.2	1.99345	0.995267	6.90606e-21	9.67781e-20
	ELL2	140.75	687.576	4.67726	2.22566	7.0993e-21	9.93903e-20
	PGP	4662.21	2147.12	0.462353	-1.11293	9.44502e-21	1.32103e-19
	RAD51C	5794.61	11348.6	1.95167	0.96471	1.00552e-20	1.40503e-19
	SRSF1	20717.8	11125.8	0.538451	-0.893113	1.12716e-20	1.57348e-19
	NOP2	4416.96	1849.65	0.416942	-1.26208	1.12972e-20	1.57553e-19
	TRAFD1	3600.64	7418.11	2.04956	1.03531	1.14863e-20	1.59918e-19
	WDR74	2852.89	1169.11	0.411116	-1.28238	1.14887e-20	1.59918e-19
	ZNF117	498.344	1536.13	3.05064	1.60911	1.26267e-20	1.75589e-19
	ABCC1	5977.01	11631.5	1.93947	0.955666	1.26662e-20	1.75802e-19
	APOBEC3H	15.2637	264.164	13.4416	3.74863	1.26652e-20	1.75802e-19
	ODF2	4001.82	1788.95	0.448409	-1.15711	1.28296e-20	1.779e-19
	TSPYL2	917.722	2391.17	2.57647	1.3654	1.40289e-20	1.94344e-19
	GPR126	3349.7	6767.87	2.01288	1.00926	1.47148e-20	2.03653e-19
	ICMT	6875.95	3385.7	0.494893	-1.01481	1.53051e-20	2.11621e-19
	HIST2H2BE	823.04	2620.54	3.0536	1.61051	1.53431e-20	2.11945e-19
	MARVELD2	729.023	1982.82	2.6907	1.42798	1.53625e-20	2.12011e-19
	WDR34	13661.4	7114.69	0.522125	-0.937533	1.65203e-20	2.27773e-19
	WDR46	3790.43	1688.06	0.448492	-1.15685	1.70065e-20	2.34255e-19
	SPINT1	6293.71	12021.2	1.90449	0.929402	1.82175e-20	2.50698e-19
	ACTBL2	1.75235	185.274	35.3452	5.14344	1.99676e-20	2.74522e-19
	CERS5	1675.63	3716.68	2.20684	1.14198	2.10401e-20	2.88993e-19
	URB2	1643.48	566.22	0.350144	-1.51398	2.14643e-20	2.94541e-19
	TCP11L1	439.009	1352.95	3.03006	1.59935	2.20457e-20	3.02234e-19
	RNF157-AS1	0.424229	165.746	46.7487	5.54685	2.22247e-20	3.04401e-19
	GABARAPL2	3135.52	6674.49	2.10758	1.07559	2.23458e-20	3.05771e-19
	DOCK3	232.546	924.46	3.86222	1.94943	2.42856e-20	3.32003e-19
	CDH3	5751.05	11110.4	1.92869	0.947619	2.59564e-20	3.5451e-19
	TOM1L2	2469.94	5284.58	2.13613	1.095	2.6699e-20	3.6431e-19
	NEURL1B	1692.47	3741.29	2.19823	1.13634	2.67543e-20	3.64722e-19
	PNPO	1530.14	3441.24	2.23625	1.16108	2.93353e-20	3.99531e-19
	SH3BP2	2940.24	5996.65	2.03118	1.02232	3.09636e-20	4.21313e-19
	SLC2A4RG	6457.19	3125.33	0.48581	-1.04154	3.19481e-20	4.34303e-19
	ANO9	955.762	2369.46	2.46426	1.30115	3.35689e-20	4.55909e-19
	STX16	5728.4	11055.5	1.92201	0.942616	3.42962e-20	4.65352e-19
	RAN	17085.7	8637.05	0.50703	-0.979858	3.82149e-20	5.1804e-19
	PPM1G	11327.5	5930.34	0.52507	-0.929418	3.91794e-20	5.30619e-19
	TIMM50	3186.25	1384.31	0.437967	-1.19111	3.93168e-20	5.31985e-19
	GART	4198.28	1792.58	0.425646	-1.23227	4.06785e-20	5.49897e-19
	AAMP	7167.65	3488.15	0.487942	-1.03522	4.13026e-20	5.57815e-19
	UTP18	2911.78	1201.27	0.416636	-1.26314	4.22955e-20	5.70694e-19
	SPC24	464.864	63.1748	0.147631	-2.75993	4.47656e-20	6.03463e-19
	IL17RB	350.053	32.916	0.109235	-3.1945	4.54328e-20	6.1189e-19
	ZNF654	467.648	1406.04	2.96922	1.57008	4.58105e-20	6.16406e-19
	SYT8	244.48	925.667	3.67811	1.87896	4.61374e-20	6.2023e-19
	SDC2	1053.59	288.201	0.2807	-1.8329	4.84092e-20	6.50168e-19
	EIF4A3	7947.62	4037.7	0.509823	-0.971931	4.95543e-20	6.64933e-19
	GEN1	1623.48	559.689	0.349244	-1.51769	5.14538e-20	6.89784e-19
	DDX12P	719.464	137.647	0.201158	-2.3136	5.1681e-20	6.92192e-19
	AMD1	4641.54	2096.5	0.452278	-1.14472	5.28865e-20	7.07686e-19
	SUV39H1	1114.94	294.502	0.268613	-1.8964	5.82638e-20	7.78924e-19
	ARPC2	9492.49	17686.1	1.85612	0.892291	5.94526e-20	7.94085e-19
	LBX1-AS1	0	150.399	50.7222	5.66455	6.16057e-20	8.22089e-19
	HMOX1	124.361	622.838	4.76988	2.25395	6.65926e-20	8.87819e-19
	SRPRB	4305.95	1996.72	0.46631	-1.10064	6.7465e-20	8.98627e-19
	THSD4	2648.88	5585.71	2.1031	1.07252	6.7727e-20	9.0129e-19
	NOP58	3654.51	1635.58	0.449297	-1.15426	6.94756e-20	9.23714e-19
	KDM4A	2328.3	5057.84	2.15839	1.10995	7.03314e-20	9.34238e-19
	SNRPG	2481.33	1003	0.407402	-1.29547	8.00851e-20	1.06283e-18
	ODC1	2619.9	1092.84	0.421373	-1.24683	8.07895e-20	1.0712e-18
	AURKAIP1	4609.93	2088.65	0.454474	-1.13773	8.24758e-20	1.09256e-18
	CCT2	15520.3	8148.09	0.527084	-0.923896	8.29813e-20	1.09826e-18
	RAB27B	1479.52	3634.82	2.39834	1.26204	8.43447e-20	1.11528e-18
	RAB44	0.424229	159.266	44.7884	5.48505	8.66045e-20	1.14412e-18
	EPHB4	8212.93	15270.7	1.85402	0.890657	8.67471e-20	1.14497e-18
	HS1BP3	924.085	2439.59	2.60061	1.37885	1.00176e-19	1.32102e-18
	AKAP1	7375.34	3736.1	0.508265	-0.976347	1.01658e-19	1.33934e-18
	ISYNA1	1424.32	3346.4	2.32508	1.21728	1.02556e-19	1.34994e-18
	EFNA3	1200.16	347.573	0.293761	-1.76728	1.05281e-19	1.38457e-18
	RABL6	9743.5	5074.71	0.522204	-0.937315	1.06e-19	1.39276e-18
	ARRDC4	615.331	1700.76	2.72502	1.44627	1.07211e-19	1.40739e-18
	EPHX1	2238.64	4726.11	2.10489	1.07374	1.08602e-19	1.42437e-18
	PHB	9009.22	4619.52	0.513663	-0.961105	1.20843e-19	1.58349e-18
	GSK3B	2521.6	5214.81	2.05842	1.04153	1.24163e-19	1.62552e-18
	PSMC3	8995.93	4467.7	0.495504	-1.01303	1.29901e-19	1.69912e-18
	ARHGEF19	1656.69	594.018	0.361355	-1.46851	1.39699e-19	1.82563e-18
	TRIM28	24956	13763.6	0.55264	-0.855589	1.41956e-19	1.85346e-18
	TAGLN2	11223	5744.08	0.512701	-0.963811	1.61187e-19	2.10266e-18
	PPP1R15A	562.844	1643.7	2.86987	1.52099	1.73322e-19	2.25894e-18
	TACSTD2	9838.64	18357.6	1.85015	0.887639	1.84557e-19	2.40322e-18
	PHPT1	5354.88	10679.5	1.98055	0.985899	1.91504e-19	2.49144e-18
	METTL1	1405.45	468.487	0.339015	-1.56058	1.93903e-19	2.52039e-18
	A2ML1	38.5516	356.26	8.11571	3.02072	1.95561e-19	2.53967e-18
	RALGPS1	1100.37	2749.91	2.45412	1.29521	1.96207e-19	2.54578e-18
	RPS6KA5	207.659	894.745	4.1981	2.06974	1.96845e-19	2.55178e-18
	TMC7	331.487	1096.95	3.2406	1.69626	1.97947e-19	2.56379e-18
	DGKE	1239.64	383.293	0.316408	-1.66014	2.15434e-19	2.78779e-18
	UCK2	2519.8	951.992	0.377752	-1.40449	2.26607e-19	2.92976e-18
	SLC27A3	3284.51	1390.32	0.422766	-1.24207	2.53227e-19	3.27102e-18
	C6orf211	8283.71	4277.65	0.518321	-0.948083	2.63815e-19	3.40476e-18
	IMP4	4987.92	2400.22	0.48462	-1.04508	2.76248e-19	3.56206e-18
	HMGN2	2616.84	1110.6	0.427669	-1.22543	2.85487e-19	3.67793e-18
	APPBP2	17830.4	32036.6	1.79197	0.841543	2.93529e-19	3.77818e-18
	HAUS7	2312.27	915.762	0.397457	-1.33113	3.09979e-19	3.98639e-18
	ASPM	3627.58	141.859	0.057271	-4.12605	3.41867e-19	4.39259e-18
	HMCN2	4.49172	193.973	23.7408	4.56929	3.43458e-19	4.40913e-18
	DUSP16	1405.1	3200.88	2.25858	1.17542	3.52526e-19	4.52155e-18
	RUVBL1	5558.14	2752.71	0.497284	-1.00786	3.61198e-19	4.62868e-18
	GSS	3269.39	6469.23	1.97021	0.978352	3.63689e-19	4.65651e-18
	YDJC	2360.54	977.198	0.41736	-1.26063	3.66367e-19	4.68666e-18
	DENND2D	1508.98	3541.33	2.33142	1.22121	3.68088e-19	4.70453e-18
	CDC25B	5746.01	2765.9	0.485246	-1.04321	3.72264e-19	4.75372e-18
	NAA10	6402.46	3164.53	0.496121	-1.01124	3.88848e-19	4.96114e-18
	TSPAN31	916.841	2260.48	2.45359	1.2949	3.90072e-19	4.97239e-18
	EPB41L1	2911.38	5873.95	2.002	1.00144	3.93276e-19	5.00884e-18
	TOB1	3697.01	8011.97	2.1433	1.09983	4.05722e-19	5.16283e-18
	ASB13	2763.96	1188.37	0.434018	-1.20417	4.18518e-19	5.321e-18
	DDX46	5354.51	2424.83	0.451654	-1.14671	4.45738e-19	5.66212e-18
	RIF1	2878.32	1252.26	0.437575	-1.1924	4.56745e-19	5.79687e-18
	YBX2	1264.56	384.455	0.308713	-1.69566	4.74956e-19	6.02274e-18
	RAB1A	6016.06	12136.6	2.00278	1.002	4.85906e-19	6.15622e-18
	BLCAP	2746.28	5544.19	2.00698	1.00503	5.13487e-19	6.49999e-18
	HAGHL	1667.04	602.686	0.365768	-1.451	5.38413e-19	6.80959e-18
	HSP90AA1	58187.8	33064.6	0.569427	-0.812417	5.61904e-19	7.10051e-18
	GRHL1	1408.41	3133.39	2.21316	1.14611	6.13833e-19	7.74998e-18
	HNRNPU	15807.4	8003.45	0.50365	-0.989506	6.31564e-19	7.96692e-18
	CLN8	1676.86	3665.36	2.16883	1.11692	6.3757e-19	8.03571e-18
	MUC2	30.2972	334.958	9.197	3.20116	6.79602e-19	8.55804e-18
	ITGB6	2095.53	4393.46	2.0943	1.06647	7.20123e-19	9.06046e-18
	PFAS	2420.13	964.409	0.398591	-1.32702	7.26733e-19	9.13571e-18
	SLC35F6	2539.57	5605.18	2.2063	1.14163	7.52021e-19	9.44543e-18
	KIAA2026	608.264	1639.12	2.66039	1.41164	7.94546e-19	9.97093e-18
	PMAIP1	238.383	879.602	3.58827	1.84329	7.99905e-19	1.00295e-17
	TCEB3	2729.99	1145.09	0.421623	-1.24597	8.04415e-19	1.00774e-17
	ADAM15	11558.6	5976.3	0.518923	-0.946407	8.30004e-19	1.0389e-17
	GPSM2	2686.69	1020.71	0.385379	-1.37565	8.50275e-19	1.06336e-17
	U2AF2	15120	8226.97	0.544771	-0.876278	8.85284e-19	1.10619e-17
	SNHG1	4756.57	2279.27	0.481549	-1.05425	9.65497e-19	1.20538e-17
	ITPKC	1339.29	2992.31	2.21955	1.15027	1.0057e-18	1.25388e-17
	PDE4A	141.33	662.661	4.48403	2.16479	1.00607e-18	1.25388e-17
	KREMEN2	1113.74	344.661	0.315631	-1.66369	1.01695e-18	1.26635e-17
	RIBC2	219.133	6.77706	0.0513199	-4.28434	1.04841e-18	1.30441e-17
	RRM1	4682.51	2273.68	0.487852	-1.03549	1.09286e-18	1.35855e-17
	ENG	7.88556	208.371	17.2915	4.11199	1.13032e-18	1.40343e-17
	HNRNPDL	6112.41	3094.31	0.508559	-0.975514	1.1309e-18	1.40343e-17
	C1orf226	781.653	1969.98	2.49789	1.32071	1.15673e-18	1.43426e-17
	MYO1E	877.371	2148.7	2.42539	1.27822	1.19076e-18	1.47521e-17
	CYC1	10710.8	5689.4	0.533382	-0.906759	1.22113e-18	1.51154e-17
	LGR6	19.0179	270.364	11.4326	3.51508	1.25812e-18	1.556e-17
	WDR3	2819.81	1244.18	0.444332	-1.17029	1.34786e-18	1.66557e-17
	SMYD5	2180.47	896.078	0.414514	-1.27051	1.36959e-18	1.69098e-17
	SSTR5-AS1	13.5668	233.696	13.0393	3.70479	1.44019e-18	1.77665e-17
	CYCS	3463.33	1590.97	0.462015	-1.11399	1.51628e-18	1.86892e-17
	POLD2	4257.78	1912.56	0.452655	-1.14352	1.56111e-18	1.92255e-17
	JADE2	3089.21	1368.51	0.444747	-1.16894	1.61075e-18	1.982e-17
	DPH2	1908.82	750.571	0.396855	-1.33331	1.67029e-18	2.05352e-17
	WDR5	5757.43	2869.97	0.500922	-0.997342	1.73311e-18	2.12895e-17
	PSD3	456.143	1333.39	2.87926	1.5257	1.73745e-18	2.13249e-17
	PRDX4	5654.36	2840.62	0.504499	-0.987075	1.7643e-18	2.16362e-17
	SIN3A	3398.84	1565.17	0.462742	-1.11172	1.82366e-18	2.23453e-17
	PRKAR1B	2246.54	924.265	0.413243	-1.27494	1.83187e-18	2.2427e-17
	ATXN3	562.473	1537.43	2.69569	1.43066	1.86489e-18	2.28119e-17
	MAFB	521.325	1523.82	2.9149	1.54345	1.87616e-18	2.29305e-17
	MTMR4	3550.45	1642.59	0.466036	-1.10149	1.93587e-18	2.36403e-17
	SYK	1036.46	2430.31	2.32647	1.21814	1.99551e-18	2.43482e-17
	RAVER1	3334.31	1493.76	0.451946	-1.14578	2.09783e-18	2.55753e-17
	LCE1C	0	136.523	44.5781	5.47826	2.44273e-18	2.9755e-17
	CASC10	304.622	1019.71	3.26334	1.70635	2.56709e-18	3.12437e-17
	HTATSF1	4748.46	2281.03	0.480672	-1.05688	2.94231e-18	3.57805e-17
	SDR9C7	2.57309	178.472	28.0415	4.80949	3.17584e-18	3.85881e-17
	COL4A1	2.20429	157.928	28.3061	4.82304	3.28358e-18	3.98638e-17
	MAPK11	678.731	1750.86	2.54888	1.34986	3.34767e-18	4.06079e-17
	CDIP1	0.424229	138.696	39.3981	5.30005	3.36075e-18	4.07326e-17
	LINC01164	7.74698	1149.16	39.2816	5.29578	3.47278e-18	4.20554e-17
	LAS1L	2697.67	1185.5	0.441892	-1.17823	3.55995e-18	4.30751e-17
	DQX1	42.5274	1471.28	20.746	4.37476	3.58341e-18	4.33229e-17
	PTRH2	4243.87	2052.3	0.485942	-1.04115	3.79915e-18	4.5893e-17
	CAMK2G	2549.83	5091.89	1.98779	0.991165	3.92268e-18	4.73459e-17
	LPIN1	760.471	1903.69	2.47793	1.30914	3.94759e-18	4.7607e-17
	EPHB3	1489.65	3293.8	2.20893	1.14335	3.95214e-18	4.76223e-17
	SLC6A3	34.19	368.306	9.28205	3.21444	4.0274e-18	4.84889e-17
	MARC1	768.574	190.761	0.257635	-1.9566	4.10703e-18	4.94068e-17
	TMEM26	570.58	110.326	0.204726	-2.28823	4.23896e-18	5.09517e-17
	ATP1B3	4267.59	2077.23	0.48895	-1.03224	4.26516e-18	5.12243e-17
	C1orf35	1329.9	461.451	0.352613	-1.50384	5.03126e-18	6.03751e-17
	LDB1	3669.25	7388.96	2.00241	1.00174	5.21685e-18	6.25505e-17
	ING5	1204.01	375.053	0.316922	-1.6578	5.27062e-18	6.31432e-17
	PPAT	1349.29	464.313	0.349538	-1.51648	5.45477e-18	6.52955e-17
	ZNF33A	1255.6	2827.1	2.24114	1.16423	5.96261e-18	7.13158e-17
	CHPT1	1242.39	419.443	0.343423	-1.54194	6.02869e-18	7.20468e-17
	CEMIP	98.2422	685.095	6.04209	2.59505	6.42345e-18	7.67014e-17
	MED13L	4475.42	8392.81	1.86992	0.902973	6.82339e-18	8.14101e-17
	NHP2	6448.98	3345.01	0.520637	-0.941651	7.18342e-18	8.56353e-17
	TSR1	5012.94	2466.19	0.493851	-1.01785	7.21946e-18	8.59945e-17
	PRPF3	7432.01	3912.4	0.528232	-0.920756	7.35566e-18	8.7545e-17
	ZNF37A	698.013	1908.59	2.67706	1.42065	7.39921e-18	8.79912e-17
	LINC00657	5249.29	9840	1.86663	0.900436	7.736e-18	9.19212e-17
	PVRL1	7735.16	13959.9	1.79954	0.847632	8.04306e-18	9.54916e-17
	EXOSC5	1515.49	554.988	0.371233	-1.4296	8.47023e-18	1.00481e-16
	ANGPT4	1.72463	148.745	29.3932	4.87741	8.87575e-18	1.05206e-16
	SNRPA1	1577.96	501.739	0.316308	-1.6606	8.8939e-18	1.05335e-16
	TOR3A	5774.09	2949.27	0.513005	-0.962956	9.60144e-18	1.13622e-16
	ZFP36	850.001	2047.44	2.38815	1.25589	9.70617e-18	1.14768e-16
	PSG5	5.76441	181.012	18.8416	4.23585	9.7437e-18	1.15118e-16
	GALK1	2345.62	1004.61	0.432056	-1.21071	9.84617e-18	1.16234e-16
	YWHAH	4329.81	2006.13	0.466566	-1.09985	9.91458e-18	1.16947e-16
	SLC25A45	79.8511	488.157	5.64221	2.49626	1.0042e-17	1.18353e-16
	CMC2	2426.47	1049.9	0.436232	-1.19683	1.03267e-17	1.21611e-16
	PLA2G6	382.352	1192.82	3.05118	1.60937	1.09235e-17	1.28535e-16
	EMG1	2347.63	1007.89	0.432676	-1.20864	1.09766e-17	1.29055e-16
	PAGR1	3649.98	1653.68	0.455261	-1.13524	1.11023e-17	1.30427e-16
	ABCE1	2672.45	1182.44	0.445334	-1.16704	1.15087e-17	1.35092e-16
	TGFBI	2198.32	4638.99	2.09219	1.06502	1.15881e-17	1.35914e-16
	DDX39A	5187.56	2459	0.477498	-1.06643	1.16344e-17	1.36348e-16
	UNC13B	1359.27	2971.32	2.175	1.12101	1.16941e-17	1.36937e-16
	CEBPZ	2254.02	942.092	0.421356	-1.24689	1.19028e-17	1.39269e-16
	RHNO1	1441.02	525.018	0.369416	-1.43668	1.2093e-17	1.4138e-16
	CLUH	10305.8	5519.9	0.535719	-0.900452	1.22466e-17	1.43061e-16
	LSG1	4328.92	2121.22	0.492912	-1.0206	1.27942e-17	1.49338e-16
	CD3EAP	1299.09	447.019	0.350114	-1.5141	1.28129e-17	1.49436e-16
	NUP62	4185.48	2053.53	0.492505	-1.02179	1.28924e-17	1.50243e-16
	TSPAN3	3300.62	1484.32	0.45581	-1.1335	1.30258e-17	1.51676e-16
	DSCAML1	12.9124	270.222	14.8479	3.89219	1.33179e-17	1.54953e-16
	SLFN11	401.104	48.6137	0.136514	-2.87288	1.38469e-17	1.60979e-16
	LOC101243545	26.0912	284.453	9.14878	3.19358	1.39539e-17	1.62092e-16
	DUSP3	2414.51	5056.91	2.07911	1.05596	1.4993e-17	1.74024e-16
	PYROXD2	692.345	1790.81	2.56489	1.3589	1.54182e-17	1.78817e-16
	ERV3-1	477.891	1336.17	2.75481	1.46195	1.64907e-17	1.91103e-16
	B3GNT5	119.925	581.4	4.58341	2.19642	1.65857e-17	1.92051e-16
	TRIB2	529.756	1509.57	2.76126	1.46533	1.7071e-17	1.97513e-16
	NUP188	6974.62	3675.39	0.529135	-0.918293	1.74283e-17	2.01486e-16
	PRMT5	5801.37	2949.8	0.508597	-0.975404	1.74525e-17	2.01605e-16
	MT1F	651.907	1698.44	2.54893	1.34989	1.80131e-17	2.07916e-16
	GAS7	0.848458	144.705	34.3679	5.10299	1.84776e-17	2.13109e-16
	LYNX1	28.1207	290.478	8.76389	3.13157	1.89126e-17	2.17952e-16
	PPFIBP1	650.975	1680.44	2.54428	1.34726	2.13603e-17	2.45966e-16
	NR2C2AP	2142.31	907.546	0.427346	-1.22652	2.25543e-17	2.59509e-16
	TRMT1	2523.83	1097.91	0.437782	-1.19171	2.30342e-17	2.6482e-16
	ZKSCAN1	4094.5	7689.27	1.87129	0.904035	2.33403e-17	2.68128e-16
	ESYT2	7088.95	13074.7	1.84412	0.882935	2.35487e-17	2.70308e-16
	RPTN	0	127.305	41.0017	5.35761	2.38271e-17	2.73288e-16
	ALDH3A1	4.88824	184.991	20.7602	4.37575	2.52984e-17	2.89934e-16
	JADE1	782.791	151.77	0.201286	-2.31268	2.68373e-17	3.07328e-16
	LY6E	16376	9232.65	0.56484	-0.824087	2.74902e-17	3.14557e-16
	ZWILCH	2079.75	872.992	0.423614	-1.23918	2.77385e-17	3.17149e-16
	AMZ2P1	460.296	1310.41	2.80445	1.48772	2.79125e-17	3.18636e-16
	PTPRH	17.9477	265.155	11.2762	3.49521	2.78999e-17	3.18636e-16
	CRISPLD2	759.94	1864.93	2.43479	1.2838	2.83939e-17	3.23877e-16
	ARFGAP3	649.344	1659.97	2.52583	1.33676	3.09492e-17	3.52748e-16
	GAREM	471.456	1332.68	2.7869	1.47866	3.14458e-17	3.57847e-16
	SPATA33	1324.16	451.155	0.345818	-1.53192	3.14403e-17	3.57847e-16
	ATP7A	484.059	1344.35	2.74252	1.4555	3.15045e-17	3.58234e-16
	TIMM10	2336.85	1018.1	0.438702	-1.18869	3.23339e-17	3.67377e-16
	ABCA5	535.003	1438.93	2.64997	1.40598	3.36728e-17	3.82291e-16
	VRK1	1492.56	524.781	0.35426	-1.49712	3.39133e-17	3.84722e-16
	ARFGEF2	4531.56	8410.19	1.85241	0.889404	3.41292e-17	3.86868e-16
	ALDH2	4.83281	167.914	19.5714	4.29067	3.57828e-17	4.04981e-16
	ITFG1	1223.86	2702.89	2.18946	1.13058	3.57814e-17	4.04981e-16
	NTPCR	711.094	1869.49	2.59735	1.37704	3.6355e-17	4.11137e-16
	NAT8L	2217.62	918.418	0.418328	-1.25729	3.82252e-17	4.3195e-16
	KIAA1324	1299.74	2859.89	2.22224	1.15201	3.98183e-17	4.49603e-16
	PTGES3	9049.34	4904.62	0.54381	-0.878826	4.03262e-17	4.54985e-16
	CTSC	1156.47	387.877	0.341827	-1.54866	4.08462e-17	4.60494e-16
	C9orf142	2663.27	1101.35	0.415423	-1.26735	4.11015e-17	4.63013e-16
	NETO2	1891.69	777.361	0.415045	-1.26866	4.21779e-17	4.74771e-16
	HS3ST6	3.56012	159.787	22.3437	4.4818	4.2273e-17	4.75473e-16
	FMNL3	688.94	169.464	0.255782	-1.96701	4.35006e-17	4.88902e-16
	AHNAK	27203	50811.4	1.87037	0.90332	4.61431e-17	5.18201e-16
	SLCO4A1	2197.62	929.289	0.425705	-1.23207	4.71272e-17	5.28844e-16
	TMBIM1	118.081	553.906	4.45466	2.15531	5.3203e-17	5.96563e-16
	NSD1	6195.91	11602.4	1.85436	0.890924	5.47644e-17	6.13597e-16
	NXN	295.464	953.439	3.1557	1.65796	5.50363e-17	6.16169e-16
	ADRA2C	2440.67	5100.82	2.08741	1.06171	5.7647e-17	6.44901e-16
	CUL7	3449.56	6525.02	1.88514	0.914672	5.7989e-17	6.48227e-16
	FAM20C	1798.61	720.613	0.405139	-1.30351	5.98488e-17	6.68503e-16
	FHOD1	2893.22	1298.03	0.450418	-1.15067	6.16833e-17	6.87937e-16
	RAB10	4321.31	8023.2	1.84815	0.88608	6.16522e-17	6.87937e-16
	DOK1	544.024	106.19	0.204727	-2.28823	6.22917e-17	6.9419e-16
	PARP2	1807.91	725.485	0.404919	-1.30429	6.7363e-17	7.50129e-16
	TRAF3	2429.74	1063.21	0.439278	-1.1868	6.87016e-17	7.6445e-16
	INADL	1631.5	3459.64	2.10668	1.07497	6.89875e-17	7.67044e-16
	BAG3	4949.03	9031.21	1.81984	0.863814	7.34885e-17	8.16464e-16
	LINC00263	319.415	1043.83	3.17683	1.66759	7.48238e-17	8.30664e-16
	MRAS	86.012	466.369	5.06388	2.34024	7.72488e-17	8.56931e-16
	GNPDA1	2082.06	4286.52	2.04889	1.03484	8.63302e-17	9.56942e-16
	DNHD1	127.173	589.371	4.42233	2.14481	8.70453e-17	9.63399e-16
	HAUS5	1771.7	651.264	0.369991	-1.43444	8.70385e-17	9.63399e-16
	CXorf23	407.459	1227.31	2.96304	1.56708	8.74894e-17	9.67577e-16
	OXTR	265.502	1050.33	3.63119	1.86044	8.93888e-17	9.87248e-16
	U2AF1	6849.19	3628.41	0.531806	-0.911028	8.9404e-17	9.87248e-16
	AGAP11	35.0746	306.944	7.60113	2.92621	9.08937e-17	1.00294e-15
	HSD17B7P2	125.276	589.471	4.51524	2.1748	9.16221e-17	1.01021e-15
	KRT16	93.1238	502.952	4.98909	2.31878	9.72482e-17	1.07143e-15
	KAT2B	352.746	1069.39	2.97404	1.57242	9.74816e-17	1.07318e-15
	AURKAPS1	375.057	45.2878	0.136426	-2.87381	1.00824e-16	1.10914e-15
	TBRG4	4027.71	1982.3	0.494756	-1.01521	1.01222e-16	1.11268e-15
	VEZF1	2648	5114.72	1.92348	0.943719	1.108e-16	1.21704e-15
	LPXN	30.1864	287.274	8.12628	3.02259	1.14864e-16	1.26072e-15
	PELP1	3099.61	1454.46	0.471138	-1.08578	1.16745e-16	1.28041e-15
	FOS	291.305	947.865	3.16552	1.66244	1.17583e-16	1.28862e-15
	TPI1	14925.7	8412.37	0.56561	-0.822121	1.18943e-16	1.30254e-15
	MRI1	1600.16	3321.23	2.06616	1.04695	1.22652e-16	1.34215e-15
	GPATCH4	2350.55	899.443	0.378538	-1.40149	1.2542e-16	1.37141e-15
	KIF4B	205.033	6.39689	0.0536627	-4.21994	1.26699e-16	1.38436e-15
	MIR1204	37.9611	318.134	7.33634	2.87506	1.29379e-16	1.41258e-15
	RNF144B	94.6544	491.459	4.87095	2.2842	1.42438e-16	1.55398e-15
	F12	730.809	182.125	0.25741	-1.95786	1.52498e-16	1.66249e-15
	ZNF596	69.7612	427.578	5.63779	2.49513	1.56604e-16	1.70598e-15
	PFKFB3	6373.82	11638.9	1.81946	0.863513	1.67452e-16	1.82278e-15
	NES	880.14	250.598	0.288611	-1.7928	1.70078e-16	1.84998e-15
	ZC3H18	5604.96	2626.68	0.466176	-1.10105	1.83187e-16	1.99108e-15
	MSMO1	2145.94	4375.79	2.00975	1.00702	1.83794e-16	1.99563e-15
	TRIM8	2135.96	4416.99	2.06123	1.0435	1.8388e-16	1.99563e-15
	CYTH2	5045.42	9368.44	1.85179	0.888922	1.86285e-16	2.02022e-15
	PCMT1	5725.63	3019.38	0.529018	-0.918611	1.86721e-16	2.02344e-15
	HMBS	3244.6	1563.13	0.484544	-1.0453	1.89124e-16	2.04795e-15
	WDR63	3.42155	158.601	21.9661	4.45721	1.90043e-16	2.05637e-15
	SNRNP70	7418.45	3712.61	0.499709	-1.00084	1.93978e-16	2.09738e-15
	APAF1	524.071	1387.54	2.61133	1.38478	2.10724e-16	2.27676e-15
	DHX37	3125.83	1441.77	0.461322	-1.11615	2.10933e-16	2.27732e-15
	CAMK2N2	526.618	109.064	0.21909	-2.1904	2.34403e-16	2.52883e-15
	DYNLL2	6587.72	3523.81	0.53681	-0.897517	2.45231e-16	2.64369e-15
	ILF2	12879	6960.74	0.542136	-0.883272	2.73265e-16	2.94372e-15
	MYO1C	8592.78	4737.2	0.553104	-0.854378	2.76058e-16	2.97161e-15
	VKORC1L1	3070.73	1461.29	0.479441	-1.06057	2.76513e-16	2.97431e-15
	RNF213	7184.43	12661.1	1.75938	0.815068	2.78702e-16	2.99563e-15
	RCN2	5595.41	2952.07	0.5295	-0.917298	2.8177e-16	3.02637e-15
	CECR5	3987.81	1976.62	0.497603	-1.00693	2.83545e-16	3.04319e-15
	MARCKS	390.2	1172.84	2.94275	1.55716	2.85077e-16	3.05737e-15
	TSPAN13	8692.85	4805.84	0.554357	-0.851111	2.97562e-16	3.18891e-15
	PDCD11	5023.03	2491.32	0.496561	-1.00996	3.02097e-16	3.23513e-15
	PMEPA1	14703.2	25392.8	1.72566	0.787149	3.10363e-16	3.3212e-15
	ITCH	1700.93	3531.39	2.06701	1.04754	3.19599e-16	3.41752e-15
	NUP205	5185.05	2713.17	0.524436	-0.931162	3.26094e-16	3.48441e-15
	DDX11	1442.4	546.482	0.384535	-1.37881	3.3373e-16	3.56339e-15
	KIF20B	1154.07	403.433	0.355431	-1.49236	3.49354e-16	3.72747e-15
	EIF1	8517.68	14887.3	1.74472	0.802991	3.58222e-16	3.81928e-15
	DDX56	3973.14	1973.77	0.500243	-0.999299	3.73256e-16	3.97665e-15
	SOX4	5709.22	10179.9	1.77857	0.830722	3.75651e-16	3.99923e-15
	CYB5D2	968.327	2181.85	2.23507	1.16032	3.9331e-16	4.18417e-15
	CMSS1	1656.28	647.646	0.393377	-1.34602	3.97721e-16	4.228e-15
	PPL	6280.27	11944.5	1.88641	0.915647	4.00962e-16	4.25934e-15
	DHRS13	703.827	175.618	0.257635	-1.9566	4.04099e-16	4.28953e-15
	SC5D	1520.22	3264	2.12261	1.08584	4.2694e-16	4.52868e-15
	HAT1	2971.11	1389.78	0.470192	-1.08868	4.49279e-16	4.76216e-15
	SNX2	2116.45	4240.32	1.99661	0.997554	4.56989e-16	4.84035e-15
	SUV420H1	2106.56	4136.75	1.95445	0.966761	4.61638e-16	4.88603e-15
	VAMP8	2985.41	5680.16	1.89274	0.920475	4.78385e-16	5.0596e-15
	TRIM16	1931.83	3856.88	1.98181	0.986816	4.78962e-16	5.06202e-15
	NIP7	2409.99	1061.77	0.4454	-1.16683	5.02937e-16	5.31154e-15
	MDM1	726.586	197.287	0.280636	-1.83323	5.22434e-16	5.51344e-15
	CCDC6	2621.21	5009.28	1.90212	0.92761	5.29255e-16	5.58137e-15
	DSE	224.319	778.347	3.36968	1.75261	5.36249e-16	5.65103e-15
	CHDH	791.282	211.351	0.276074	-1.85687	5.41774e-16	5.70512e-15
	UBQLN4	3305.81	1539.33	0.469115	-1.09199	5.46195e-16	5.7475e-15
	POLR2E	6346.17	3382.27	0.533488	-0.906471	5.54764e-16	5.83345e-15
	ARHGAP42	146.421	603.753	3.9567	1.9843	5.60856e-16	5.89324e-15
	SAMD1	1890.93	802.332	0.426994	-1.22771	5.8556e-16	6.14838e-15
	S100A10	12559.3	22196	1.75523	0.811657	5.88851e-16	6.17847e-15
	DLX1	374.428	54.8434	0.161737	-2.62828	5.89667e-16	6.18257e-15
	ACD	1524.27	603.849	0.401017	-1.31826	5.90341e-16	6.18518e-15
	GTPBP3	1421.81	547.276	0.389806	-1.35917	5.90852e-16	6.18606e-15
	ZDHHC23	950.358	304.17	0.327231	-1.61162	5.92772e-16	6.2017e-15
	AAK1	709.478	1789.29	2.48445	1.31292	5.95275e-16	6.21893e-15
	HSPA9	12816.1	7307.67	0.570696	-0.809205	5.94853e-16	6.21893e-15
	CEP78	1207.79	435.224	0.36588	-1.45056	5.97419e-16	6.23685e-15
	ALPK3	150.638	620.552	3.92805	1.97381	5.99365e-16	6.25267e-15
	NEIL3	273.579	16.6292	0.0820583	-3.60721	6.05575e-16	6.31292e-15
	SNRPF	3733.97	1725.79	0.461821	-1.1146	6.36026e-16	6.62562e-15
	KNOP1	1813.07	738.187	0.40974	-1.28722	6.59925e-16	6.86965e-15
	CGREF1	1234.7	435.312	0.358869	-1.47847	6.7757e-16	7.04828e-15
	DNPEP	5724.15	3037.64	0.531823	-0.910983	6.89851e-16	7.17089e-15
	SURF6	2552.31	1013.78	0.39639	-1.33501	6.92383e-16	7.19207e-15
	STX6	3971.48	7237.98	1.81653	0.861181	7.15499e-16	7.42688e-15
	PIFO	35.1855	295.663	7.31678	2.87121	7.17993e-16	7.44745e-15
	SLC25A10	5454.3	2848	0.524826	-0.930089	7.2989e-16	7.56545e-15
	TCEA3	40.6088	348.092	7.4629	2.89974	7.31219e-16	7.57382e-15
	MBD5	404.331	1158.03	2.8169	1.49411	7.50435e-16	7.76732e-15
	SLC35C1	6486.59	3454.6	0.532717	-0.908559	7.91257e-16	8.18402e-15
	NTHL1	1212.2	440.2	0.368947	-1.43851	8.27034e-16	8.54798e-15
	CDK5RAP2	3086.66	1434.21	0.462098	-1.11373	8.39341e-16	8.66901e-15
	TRMT10C	1893.71	793.292	0.421612	-1.24601	8.72156e-16	9.00154e-15
	OIP5	624.532	152.493	0.253463	-1.98015	8.96674e-16	9.24803e-15
	TRAF2	1819.89	756.622	0.4182	-1.25773	9.46605e-16	9.75607e-15
	ERLIN1	2463.4	1128.16	0.461127	-1.11676	9.95303e-16	1.02507e-14
	KCNJ8	315.028	34.6456	0.127869	-2.96726	1.00689e-15	1.03627e-14
	LOC100862671	585.364	1474.73	2.48951	1.31586	1.02632e-15	1.05552e-14
	NACC1	8005.75	4442.54	0.556372	-0.845877	1.03424e-15	1.06292e-14
	LPHN1	5265.86	2747.77	0.524509	-0.930962	1.1164e-15	1.14654e-14
	PDCD4	1299.13	2779.99	2.11964	1.08382	1.13158e-15	1.1613e-14
	PCNT	6103.68	3044.4	0.49723	-1.00801	1.22048e-15	1.25166e-14
	LOC100131564	105.26	499.255	4.48175	2.16406	1.22821e-15	1.2587e-14
	RIMS4	2487.11	1133.92	0.457032	-1.12963	1.23821e-15	1.26805e-14
	USP5	5124.64	2639.2	0.514063	-0.959984	1.27466e-15	1.30446e-14
	RFNG	1640.06	3477.22	2.09323	1.06573	1.28097e-15	1.30907e-14
	TKT	25843.5	43243.4	1.67198	0.741554	1.28078e-15	1.30907e-14
	ADCK3	851.742	2080.44	2.41092	1.26958	1.34667e-15	1.37525e-14
	C1orf112	1623.19	597.599	0.371159	-1.42989	1.37795e-15	1.40621e-14
	DUSP10	110.315	517.297	4.42243	2.14484	1.38238e-15	1.40974e-14
	FLJ31306	847.611	1939.93	2.26884	1.18195	1.40479e-15	1.43158e-14
	PRICKLE2-AS3	0.876173	118.912	28.8535	4.85068	1.40687e-15	1.4327e-14
	CTU2	1851.38	790.69	0.430883	-1.21463	1.4308e-15	1.45605e-14
	H2AFJ	9914.32	5611.08	0.567504	-0.817298	1.46659e-15	1.49143e-14
	PTPMT1	4021.53	2029.58	0.507209	-0.979349	1.55401e-15	1.57922e-14
	PRKAB2	1685.42	3447.79	2.03643	1.02604	1.67201e-15	1.69795e-14
	RQCD1	3196.29	1574.23	0.495359	-1.01345	1.67898e-15	1.70383e-14
	ACSS2	791.461	1841.07	2.30574	1.20523	1.69134e-15	1.71518e-14
	RRP9	1514.96	569.442	0.378826	-1.40039	1.79435e-15	1.81838e-14
	MLXIPL	421.124	1307.23	3.01032	1.58992	1.85946e-15	1.88305e-14
	SREBF2	7658.87	13467.8	1.75495	0.811431	1.93689e-15	1.96009e-14
	LRR1	1147.06	393.041	0.347315	-1.52568	1.97346e-15	1.99571e-14
	LAMC2	690.292	1801.59	2.60893	1.38346	2.09601e-15	2.11817e-14
	KIAA0020	2363.02	1060.58	0.451367	-1.14763	2.10593e-15	2.12671e-14
	NAT10	3979.74	1976.4	0.496215	-1.01096	2.18125e-15	2.20124e-14
	PAPLN	59.552	368.903	5.64262	2.49637	2.18389e-15	2.20238e-14
	NLN	2333.68	1072.96	0.462952	-1.11107	2.27658e-15	2.29426e-14
	SYNC	6.18864	178.415	16.6916	4.06105	2.43051e-15	2.44769e-14
	MIS18A	1434.17	566.257	0.400315	-1.32079	2.44603e-15	2.46161e-14
	EPCAM	13007.7	7125.56	0.551684	-0.858085	2.50909e-15	2.52333e-14
	SLC9A3R2	3688.45	1870.35	0.50942	-0.973073	2.51144e-15	2.52395e-14
	RRP15	2088.01	850.887	0.406558	-1.29847	2.59561e-15	2.60673e-14
	RPS19BP1	2384.34	1060.32	0.447992	-1.15845	2.72636e-15	2.73615e-14
	C16orf45	1052.62	2297.44	2.15969	1.11082	2.82596e-15	2.83415e-14
	CBX1	6207.75	3388.76	0.54822	-0.867173	3.09694e-15	3.10377e-14
	SH3BP5	3122.98	5923.65	1.87977	0.910555	3.16633e-15	3.17113e-14
	DARS2	4484.77	2193.26	0.496922	-1.00891	3.1737e-15	3.17632e-14
	NDRG4	378.157	1067.22	2.77259	1.47123	3.20429e-15	3.20473e-14
	HSDL2	1589.23	3200.2	2.00392	1.00282	3.23419e-15	3.23241e-14
	CIC	3232.72	6099.07	1.87485	0.906774	3.27364e-15	3.26888e-14
	KHSRP	5871.88	3186.18	0.544981	-0.875722	3.27518e-15	3.26888e-14
	CLSTN2	437.47	1205.65	2.72109	1.44419	3.29126e-15	3.28267e-14
	IMPDH1	4994.32	2620.66	0.527497	-0.922766	3.32768e-15	3.31673e-14
	CTSL	3750.34	7125.83	1.89081	0.919007	3.4175e-15	3.40391e-14
	SLITRK6	1052.06	302.913	0.290586	-1.78296	3.47279e-15	3.45662e-14
	BCLAF1	5234.52	2633.56	0.5044	-0.98736	3.47613e-15	3.45757e-14
	KLF9	463.958	1230.2	2.61646	1.38762	3.51142e-15	3.49029e-14
	ITPR3	8665.94	4899.13	0.566958	-0.818686	3.56168e-15	3.53782e-14
	RMI1	903.571	287.282	0.325712	-1.61833	3.61137e-15	3.58472e-14
	GPR56	6511.12	11366.1	1.74254	0.801189	3.84809e-15	3.8171e-14
	POLR1B	2671.51	1267.63	0.478643	-1.06298	3.86328e-15	3.82955e-14
	DHX9	12797.6	7433.31	0.582351	-0.78004	3.87083e-15	3.83442e-14
	H1F0	11663.1	6120.11	0.518829	-0.946669	3.99853e-15	3.95821e-14
	PDE5A	345.476	1006.53	2.86646	1.51927	4.05127e-15	4.0077e-14
	HELZ	2091.93	4030.69	1.9175	0.939225	4.05433e-15	4.008e-14
	PALLD	1454.62	3012.5	2.05744	1.04085	4.08587e-15	4.03643e-14
	NELFB	5395.38	2914.51	0.542198	-0.883108	4.15881e-15	4.10569e-14
	PTPRE	768.687	1842.12	2.3984	1.26207	4.23403e-15	4.17712e-14
	SFXN4	1761.78	748.858	0.429519	-1.21921	4.35351e-15	4.29207e-14
	ARSD	1440.04	2966.64	2.04199	1.02998	4.64485e-15	4.57621e-14
	EEF2	120587	196496	1.62649	0.701761	4.70707e-15	4.63436e-14
	PML	896.369	2046.94	2.25748	1.17471	4.77616e-15	4.6992e-14
	AMPD2	3803.8	1895.24	0.50212	-0.993897	4.83552e-15	4.75439e-14
	TUBG1	3627.63	1809.42	0.502094	-0.993972	4.88917e-15	4.80388e-14
	QSOX2	3446.77	1743.34	0.507937	-0.977279	5.11446e-15	5.02184e-14
	ZNF511	2143.62	974.218	0.458099	-1.12627	5.25134e-15	5.15277e-14
	ARRDC1	5509.01	9640.36	1.7437	0.802153	5.38431e-15	5.27611e-14
	MRPS2	5346.02	2770.19	0.520784	-0.941243	5.38388e-15	5.27611e-14
	CSTF2	2630	1184.72	0.45053	-1.15031	5.41103e-15	5.29873e-14
	CEP85	1419.29	568.158	0.405315	-1.30288	5.57487e-15	5.45549e-14
	XRCC5	18489.8	10956.3	0.593974	-0.751529	5.65361e-15	5.52882e-14
	TXNDC12	3221.65	1549.5	0.485583	-1.04221	5.67194e-15	5.54301e-14
	MBNL2	777.251	1892.73	2.41136	1.26984	5.8104e-15	5.67451e-14
	ZFP36L2	6679.52	12604	1.86596	0.899917	5.81834e-15	5.67845e-14
	MYO1A	3.08046	134.021	19.9987	4.32183	6.10728e-15	5.95644e-14
	ZNF48	1682.17	683.177	0.409356	-1.28857	6.29151e-15	6.13201e-14
	LINC00887	2.6008	133.477	21.2774	4.41125	6.35637e-15	6.19107e-14
	ATF5	2293.08	1007.79	0.442452	-1.17641	6.46211e-15	6.28985e-14
	SLC9A1	4984.64	8777.27	1.75561	0.811974	6.48141e-15	6.30441e-14
	WDR4	1925.73	848.525	0.445289	-1.16719	6.50828e-15	6.32631e-14
	PRPS2	1750.22	754.769	0.435204	-1.20024	6.84535e-15	6.64951e-14
	FAM13C	0	102.947	32.7584	5.03379	6.97711e-15	6.77297e-14
	BCL2L12	1102.89	386.063	0.356675	-1.48732	7.22293e-15	7.00691e-14
	SART3	3653.89	1848.88	0.506838	-0.980404	7.40751e-15	7.18118e-14
	IQSEC3	1.78006	122.618	23.5035	4.5548	7.44915e-15	7.21673e-14
	GPR115	321.112	950.281	2.89708	1.5346	7.7364e-15	7.49003e-14
	RPH3AL	390.042	1078.8	2.72149	1.4444	7.74302e-15	7.49145e-14
	RBFA	1188.1	428.881	0.367619	-1.44372	7.77888e-15	7.52114e-14
	CDK18	1264.4	2673.27	2.1039	1.07307	7.89659e-15	7.62987e-14
	JUND	4392.9	7773.88	1.76408	0.818916	8.10493e-15	7.82597e-14
	PTEN	1164.08	2449.23	2.0891	1.06288	8.23361e-15	7.94494e-14
	PIGW	818.831	243.088	0.305198	-1.71218	8.3883e-15	8.08883e-14
	PARP1	7451.87	4192.78	0.564187	-0.825754	8.49285e-15	8.18422e-14
	FAM195A	1193.87	436.014	0.369146	-1.43773	8.5636e-15	8.24694e-14
	DAPK1	6.47429	713.705	28.6323	4.83957	8.8358e-15	8.50343e-14
	CDK2	3687.96	1886.27	0.51309	-0.962717	9.1671e-15	8.81643e-14
	AP3S1	755.417	1744.06	2.28569	1.19263	9.43658e-15	9.06961e-14
	DRAP1	3688.14	1822.01	0.496558	-1.00997	9.65746e-15	9.27575e-14
	TTC7A	1770.81	3462.65	1.94549	0.96013	1.04819e-14	1.0061e-13
	PKD1L2	141.202	566.813	3.84606	1.94338	1.08619e-14	1.04188e-13
	SLC30A1	719.315	1720.7	2.38148	1.25186	1.08913e-14	1.04402e-13
	CLIP4	351.467	1003.39	2.79435	1.48251	1.09548e-14	1.04941e-13
	USP37	1275.25	492.072	0.39051	-1.35657	1.10198e-14	1.05494e-13
	PUS7	1662.08	710.41	0.431941	-1.21109	1.11412e-14	1.06586e-13
	TOE1	656.742	176.91	0.279208	-1.84059	1.12952e-14	1.07988e-13
	PCSK6	1229.85	454.377	0.375406	-1.41348	1.14541e-14	1.09435e-13
	XGY2	2.62852	128.05	20.5789	4.36309	1.16588e-14	1.11318e-13
	FOXO3	1042.68	2241.24	2.13828	1.09645	1.17969e-14	1.12489e-13
	TMC4	1435.49	2895	2.00729	1.00525	1.17917e-14	1.12489e-13
	CEBPZOS	666.273	1613.08	2.40602	1.26665	1.18829e-14	1.13234e-13
	GRN	10513.4	17709.8	1.68529	0.752993	1.2137e-14	1.1558e-13
	BDH1	1257.12	448.088	0.360989	-1.46997	1.34092e-14	1.27612e-13
	NEU1	3520.53	6334.09	1.79164	0.841282	1.34653e-14	1.28061e-13
	SLC9A8	1228.28	2546.2	2.05839	1.04152	1.35958e-14	1.29218e-13
	C8orf33	3698.12	1903.08	0.516602	-0.952874	1.41304e-14	1.34211e-13
	THOP1	3022.03	1491.07	0.494634	-1.01557	1.4352e-14	1.36227e-13
	ZNF195	1063.86	2277.63	2.12443	1.08708	1.44542e-14	1.37108e-13
	LOC150776	1898.71	796.23	0.423806	-1.23852	1.46446e-14	1.38823e-13
	TMEM249	48.5221	323.155	5.99282	2.58323	1.48691e-14	1.40859e-13
	TCP1	6857.06	3850.49	0.563426	-0.827703	1.48984e-14	1.41045e-13
	MBD6	2865.27	5326.29	1.85389	0.890555	1.55557e-14	1.47171e-13
	NUP160	4724.65	2500.16	0.529793	-0.9165	1.5797e-14	1.49358e-13
	EXOSC9	1195.17	454.795	0.385896	-1.37372	1.58852e-14	1.50093e-13
	FZD6	4373.75	7783.22	1.77072	0.824339	1.67327e-14	1.57998e-13
	NFATC2IP	4125.98	2176.2	0.530002	-0.915931	1.75152e-14	1.6528e-13
	HYLS1	726.967	200.274	0.287263	-1.79956	1.76392e-14	1.66342e-13
	DUSP2	662.369	182.371	0.282809	-1.8221	1.79832e-14	1.69476e-13
	MUC20	120.562	512.654	4.05833	2.02089	1.87365e-14	1.76461e-13
	HMG20B	5035.19	2734.83	0.545065	-0.8755	1.92619e-14	1.81292e-13
	TAB2	2570.94	4810.37	1.86515	0.899291	1.96249e-14	1.84588e-13
	TMEM194A	2345.57	1023.09	0.436371	-1.19637	1.9824e-14	1.8634e-13
	FBXL6	2094.51	963.425	0.463019	-1.11086	1.99773e-14	1.8766e-13
	CEP131	1772.2	717.802	0.405412	-1.30254	2.08814e-14	1.96026e-13
	SIGMAR1	972.155	336.652	0.353412	-1.50058	2.12619e-14	1.9947e-13
	CDC123	4076.29	2156.88	0.531542	-0.911744	2.25415e-14	2.11337e-13
	EHMT2	5802.54	3213.71	0.555998	-0.846848	2.30729e-14	2.16181e-13
	GALNT10	3531.18	6507.75	1.84203	0.881298	2.31397e-14	2.16666e-13
	ALDH4A1	1648.65	3241.31	1.95607	0.96796	2.35147e-14	2.20036e-13
	IQCC	524.697	122.401	0.245159	-2.02821	2.35333e-14	2.20068e-13
	NUP210	11383.7	6601.67	0.580272	-0.785198	2.36256e-14	2.2079e-13
	C16orf91	1357.07	545.136	0.406997	-1.29691	2.39368e-14	2.23554e-13
	BRINP3	336.118	50.2597	0.167192	-2.58042	2.40069e-14	2.24065e-13
	GFRA1	20208.4	11523.9	0.574118	-0.800582	2.48537e-14	2.31819e-13
	XRCC6	10673.7	6218.75	0.582772	-0.778996	2.50579e-14	2.33574e-13
	RUNX1	1156.86	2405.01	2.06499	1.04614	2.56021e-14	2.38493e-13
	CCHCR1	1026.38	294.874	0.290857	-1.78162	2.57678e-14	2.39883e-13
	EZR	6118.91	10873.8	1.76674	0.821092	2.58365e-14	2.40369e-13
	UNC13A	11.5565	228.415	13.0945	3.71089	2.59305e-14	2.41089e-13
	UBALD2	1519.39	3096.51	2.01684	1.0121	2.639e-14	2.45204e-13
	PPM1A	2064.4	3922.21	1.89127	0.919358	2.84648e-14	2.64314e-13
	FN3KRP	1734.06	760.778	0.442877	-1.17502	2.89131e-14	2.68304e-13
	OVOL1	899.563	2010.09	2.21599	1.14795	2.96979e-14	2.75412e-13
	EXOSC8	1975.62	893.897	0.45585	-1.13337	3.07473e-14	2.84962e-13
	HCN3	1018.7	357.405	0.358667	-1.47928	3.10178e-14	2.87285e-13
	ALOXE3	106.028	474.615	4.26118	2.09125	3.11704e-14	2.88515e-13
	DCAKD	950.415	2080.39	2.16818	1.11649	3.17889e-14	2.94053e-13
	LITAF	3522.12	6465.99	1.82343	0.866653	3.28422e-14	3.03602e-13
	CYBA	15081	8596.83	0.574687	-0.799153	3.30622e-14	3.05442e-13
	FAM57A	1760.25	614.81	0.345113	-1.53486	3.36882e-14	3.11027e-13
	STOML2	7687.01	4369.8	0.570859	-0.808795	3.52075e-14	3.24848e-13
	MESDC2	4672.18	2519.42	0.540903	-0.886559	3.5343e-14	3.25891e-13
	SEPHS2	7892.12	4503.53	0.572488	-0.804682	3.80067e-14	3.5023e-13
	TP53	5291.78	2787.25	0.526426	-0.925698	3.81539e-14	3.51364e-13
	MAPKBP1	592.476	1510.87	2.49841	1.32101	3.90946e-14	3.59799e-13
	ABCC3	1902.41	3791.7	1.97034	0.978448	3.93203e-14	3.61648e-13
	SLC31A2	986.745	2108.58	2.12005	1.0841	3.94424e-14	3.62541e-13
	RBM8A	6406.23	3558.16	0.556539	-0.845446	4.01354e-14	3.68677e-13
	CASP8AP2	1451.58	544.312	0.379648	-1.39727	4.21874e-14	3.87282e-13
	FAM136A	3850.86	2036.81	0.531287	-0.912436	4.36378e-14	4.00344e-13
	ARHGAP39	1815.55	797.187	0.443743	-1.1722	4.37462e-14	4.01085e-13
	LINC01004	570.51	1382.16	2.39581	1.26051	4.40771e-14	4.03864e-13
	PRRC2A	17279.4	10047.5	0.579534	-0.787034	4.41456e-14	4.04237e-13
	CCT6A	7828.32	4421.66	0.567086	-0.818361	4.55691e-14	4.17009e-13
	PPP2R3A	329.505	937.772	2.79012	1.48033	4.63913e-14	4.24266e-13
	PRKCZ	1283.35	2703.28	2.09052	1.06386	4.70054e-14	4.29611e-13
	PARPBP	944.009	329.152	0.356303	-1.48882	4.82603e-14	4.40803e-13
	MGEA5	3518.55	6378.24	1.80339	0.850711	4.88462e-14	4.45875e-13
	ARRB2	1670.86	719.28	0.434751	-1.20174	5.08395e-14	4.63779e-13
	FAM86A	824.566	264.916	0.327793	-1.60914	5.4059e-14	4.92839e-13
	LINGO1	565.296	145.552	0.268655	-1.89618	5.44948e-14	4.96501e-13
	NCLN	5026.02	2765.46	0.552342	-0.856367	5.49778e-14	5.00588e-13
	MARCKSL1	10526.2	5738.76	0.544415	-0.877222	5.50378e-14	5.0082e-13
	TMEM138	2102.52	982.691	0.471426	-1.0849	5.51327e-14	5.0137e-13
	WBP2	3053.51	5510.39	1.79779	0.846226	5.55519e-14	5.04865e-13
	UBL4A	3970.47	1987.58	0.503634	-0.989552	5.80366e-14	5.27118e-13
	TFAM	2338.82	1121.88	0.483206	-1.04929	5.85406e-14	5.31363e-13
	TANGO2	1060.92	2226.2	2.08302	1.05867	5.97169e-14	5.41702e-13
	GLRX5	3910.01	2080.43	0.534341	-0.904167	6.00369e-14	5.44264e-13
	MAPK9	3322.5	1595.99	0.48474	-1.04472	6.00846e-14	5.44358e-13
	ITGAV	4809.13	8299.01	1.72093	0.783191	6.08816e-14	5.51234e-13
	SRGAP3	41.5958	1447.83	17.8943	4.16143	6.14496e-14	5.5603e-13
	DONSON	827.086	270.694	0.335483	-1.57569	6.32075e-14	5.71582e-13
	GNL3	2841.26	1353.13	0.477208	-1.06731	6.83494e-14	6.17695e-13
	VPS8	1237.13	2514.37	2.01971	1.01415	7.02374e-14	6.34363e-13
	BOP1	1134.36	372.991	0.329062	-1.60357	7.30487e-14	6.59344e-13
	RPS6KL1	1335.21	2695.79	2.00441	1.00318	7.43905e-14	6.71039e-13
	SCNN1A	2314.93	4285.8	1.85068	0.888052	7.68131e-14	6.92462e-13
	TPP1	1359.58	2714.37	1.98443	0.988728	7.83232e-14	7.05637e-13
	NOP14	3213.51	1661.04	0.519102	-0.945911	7.9342e-14	7.14373e-13
	ISG20L2	3414.84	1761.85	0.517375	-0.950719	8.05021e-14	7.2437e-13
	SUV39H2	1019.82	346.215	0.347307	-1.52572	8.07489e-14	7.2614e-13
	RFK	981.846	2260.31	2.2606	1.17671	8.31044e-14	7.4686e-13
	XXYLT1	2407.88	1146.32	0.479114	-1.06156	8.5638e-14	7.69155e-13
	SMTN	2310.97	4270.38	1.83879	0.878759	9.20093e-14	8.25867e-13
	CCDC125	554.57	1350.76	2.40325	1.26499	9.86006e-14	8.84484e-13
	CITED2	1995.85	4081.88	2.02089	1.01499	1.0536e-13	9.44535e-13
	PRICKLE4	195.683	696.785	3.45007	1.78662	1.08183e-13	9.69244e-13
	TRPM2	2.232	117.19	20.1342	4.33158	1.10817e-13	9.92228e-13
	ITGAM	58.2686	342.218	5.34289	2.41762	1.11299e-13	9.95936e-13
	POLD4	2265.21	4540.61	1.96808	0.976788	1.11369e-13	9.9595e-13
	LMO7	693.797	1787.24	2.45027	1.29294	1.12295e-13	1.00361e-12
	EIF2S1	5003.48	2773.2	0.556104	-0.846574	1.12745e-13	1.00701e-12
	TNFSF15	5.20161	139.745	15.136	3.91991	1.13812e-13	1.01592e-12
	VARS	6907.9	3870.82	0.557854	-0.842039	1.19116e-13	1.06261e-12
	ECE2	1347.2	542.115	0.407354	-1.29564	1.21881e-13	1.08661e-12
	EMC3-AS1	1061.46	374.824	0.360676	-1.47122	1.22986e-13	1.09579e-12
	NUP35	779.465	247.121	0.326665	-1.61412	1.23464e-13	1.09938e-12
	MCL1	11999.1	19648.5	1.63411	0.708502	1.24411e-13	1.10713e-12
	PNPT1	1757.75	793.055	0.455418	-1.13474	1.24719e-13	1.10919e-12
	CELSR1	7568.74	12737.4	1.67876	0.747399	1.25404e-13	1.1146e-12
	C11orf84	1988.4	930.573	0.471737	-1.08394	1.30306e-13	1.15746e-12
	LINC00482	82.923	416.322	4.66042	2.22046	1.30923e-13	1.16223e-12
	C8orf82	1353.52	553.388	0.414417	-1.27084	1.32287e-13	1.17362e-12
	LEPREL4	1777.62	794.794	0.448987	-1.15526	1.36696e-13	1.212e-12
	GMPS	3516.53	1848.51	0.528574	-0.919823	1.39311e-13	1.23443e-12
	ACTL6A	3856.38	2045.61	0.532797	-0.908342	1.42119e-13	1.25854e-12
	PPP5C	3878.87	2082.99	0.539448	-0.890445	1.47489e-13	1.3053e-12
	YBX3	4431.8	7765.26	1.74658	0.804534	1.5038e-13	1.33008e-12
	POMT1	3679.71	1848.52	0.507818	-0.977616	1.50821e-13	1.33317e-12
	NCOA3	40806.1	65831.4	1.60592	0.683396	1.53139e-13	1.35284e-12
	MED23	1324.09	2690.9	2.0224	1.01607	1.55552e-13	1.37332e-12
	RPA2	1916.77	874.004	0.460486	-1.11877	1.55807e-13	1.37473e-12
	LHX2	239.323	24.8771	0.126926	-2.97794	1.56299e-13	1.37824e-12
	DAAM1	1757.73	3349.71	1.89584	0.92284	1.62237e-13	1.42973e-12
	PHYKPL	777.598	1735.9	2.20998	1.14403	1.70847e-13	1.5047e-12
	PAQR6	788.986	1751.96	2.20086	1.13807	1.71336e-13	1.50808e-12
	UHRF1	1895.16	120.496	0.088592	-3.49668	1.74623e-13	1.53609e-12
	INPP4B	3364.95	5923.09	1.75393	0.810592	1.78675e-13	1.57061e-12
	TMEM8B	208.363	684.116	3.18425	1.67095	1.78763e-13	1.57061e-12
	PRKCH	872.834	2062.19	2.35615	1.23643	1.79729e-13	1.57814e-12
	VKORC1	3236.61	1494.04	0.460599	-1.11842	1.86384e-13	1.63559e-12
	IGFBP4	15754.9	25666.6	1.62424	0.699763	1.89702e-13	1.6637e-12
	HOXC11	523.278	130.778	0.26202	-1.93225	2.0461e-13	1.79336e-12
	TET2	3001.88	5372.15	1.78349	0.834702	2.07621e-13	1.81865e-12
	TSPAN14	3538.93	6202.07	1.74549	0.803631	2.17916e-13	1.90653e-12
	XPO5	4780.87	2618.77	0.550151	-0.8621	2.17851e-13	1.90653e-12
	NUDT21	3645.01	1922.42	0.528468	-0.920112	2.23965e-13	1.95828e-12
	SLFN5	343.566	943.702	2.69893	1.43239	2.26535e-13	1.97928e-12
	SRRT	8971.02	5293.74	0.591441	-0.757695	2.26639e-13	1.97928e-12
	MAPK13	412.326	1077.27	2.57056	1.36208	2.26783e-13	1.97934e-12
	BAZ1B	5593.54	3076.79	0.549396	-0.864083	2.3617e-13	2.06004e-12
	CNOT6	2926.69	5248.87	1.7869	0.837462	2.36413e-13	2.06092e-12
	NIPAL2	829.693	1798.1	2.15001	1.10435	2.41302e-13	2.10227e-12
	DDX24	9520.24	5643.52	0.594184	-0.751019	2.46301e-13	2.14454e-12
	CUL9	1773.38	3364.23	1.88565	0.915066	2.51805e-13	2.19116e-12
	KPNA7	24.4497	239.52	7.91026	2.98373	2.60456e-13	2.26508e-12
	CYP4F3	0.876173	99.3331	23.4118	4.54916	2.81151e-13	2.44242e-12
	SRGAP1	552.605	1346.7	2.39537	1.26025	2.81184e-13	2.44242e-12
	R3HDM2	2332.16	4260.92	1.81786	0.862239	2.8893e-13	2.5082e-12
	ADIRF	534.553	1286.52	2.37707	1.24918	2.89701e-13	2.51339e-12
	TMEM184A	3998.71	6915.77	1.72447	0.786154	2.90292e-13	2.51702e-12
	RRP1B	3691.69	1952.72	0.529284	-0.917886	2.91904e-13	2.52949e-12
	ATP6V1A	1797.64	3452.29	1.90687	0.931207	3.00069e-13	2.59869e-12
	ERGIC1	8413.61	4931.29	0.586591	-0.769574	3.03012e-13	2.62261e-12
	STC2	30053.1	50215	1.66992	0.739776	3.16772e-13	2.74008e-12
	NEURL4	3344.97	1768.42	0.530658	-0.914147	3.2373e-13	2.7986e-12
	HAPLN3	36.0062	264.602	6.37349	2.67208	3.26788e-13	2.82335e-12
	GALNT2	4374.76	7808.28	1.7752	0.827983	3.47328e-13	2.99903e-12
	TTLL12	3621.36	1858.88	0.517387	-0.950683	3.51284e-13	3.03139e-12
	C19orf48	4985.1	2798.8	0.563328	-0.827952	3.6639e-13	3.15987e-12
	NUBP2	3605.73	1906.18	0.529777	-0.916544	3.743e-13	3.22617e-12
	VPS13D	2586.98	4668.68	1.79636	0.84508	3.80314e-13	3.27606e-12
	LINC00475	14.637	205.151	10.2854	3.36253	3.81537e-13	3.28465e-12
	SNRPD3	5481.48	3110.42	0.569297	-0.812745	4.21512e-13	3.62665e-12
	FTSJ2	2706.14	1377.17	0.51217	-0.965305	4.2737e-13	3.67488e-12
	DDX17	9429.3	15524.7	1.64339	0.716672	4.2923e-13	3.68869e-12
	DIS3L	909.167	327.593	0.367123	-1.44567	4.38021e-13	3.76201e-12
	BEX4	237.036	733.662	3.01655	1.5929	4.65992e-13	3.99988e-12
	GNB5	2037.14	973.791	0.480396	-1.0577	4.81502e-13	4.12814e-12
	MAP3K1	2639.17	4718.41	1.78045	0.832239	4.81221e-13	4.12814e-12
	MRPL14	4033.33	2207.02	0.549568	-0.86363	4.87192e-13	4.17304e-12
	RRAGC	874.064	1974.19	2.23916	1.16296	4.87314e-13	4.17304e-12
	PAFAH1B3	2563.3	1298.41	0.509599	-0.972566	4.90279e-13	4.19596e-12
	HSP90AB1	54687	34543.1	0.632924	-0.659895	5.04177e-13	4.31236e-12
	DUSP14	884.851	1874.67	2.10199	1.07175	5.09684e-13	4.3569e-12
	PCMTD1	445.465	1123.08	2.48084	1.31083	5.14215e-13	4.39304e-12
	PWP2	3280.52	1739.03	0.532857	-0.908179	5.19977e-13	4.43966e-12
	METTL16	1696.37	776.501	0.461852	-1.1145	5.22351e-13	4.45731e-12
	MREG	3929.02	7104.42	1.79577	0.844604	5.28798e-13	4.50968e-12
	C10orf118	549.616	1308.44	2.34694	1.23078	5.31678e-13	4.53158e-12
	PTBP3	4363.14	7432.11	1.69846	0.764227	5.36229e-13	4.56769e-12
	ADAM11	468.872	95.8361	0.217001	-2.20423	5.40013e-13	4.59454e-12
	CDH24	1756.91	789.007	0.453434	-1.14103	5.39869e-13	4.59454e-12
	AKT1	21818.4	13440.7	0.617228	-0.696125	5.67644e-13	4.8268e-12
	TREH	1.3004	104.735	21.3495	4.41613	5.73861e-13	4.87681e-12
	TATDN2	4989.27	2809.82	0.565264	-0.823004	6.12466e-13	5.20184e-12
	FAM188A	531.713	1312.23	2.4409	1.28741	6.23491e-13	5.29239e-12
	FNIP1	722.659	1608.93	2.20751	1.14242	6.38653e-13	5.41792e-12
	IRF3	3512.1	1845.32	0.529136	-0.91829	6.42756e-13	5.44955e-12
	DCP1B	340.089	984.112	2.85671	1.51435	6.71108e-13	5.68661e-12
	ASXL1	3196.89	1697.11	0.532901	-0.90806	7.0454e-13	5.9643e-12
	SHMT1	2190.95	1067.84	0.489038	-1.03198	7.047e-13	5.9643e-12
	ARHGEF2	1261.73	522.57	0.419605	-1.2529	7.16783e-13	6.06303e-12
	IER2	2758.15	4982.93	1.7972	0.845752	7.17947e-13	6.06935e-12
	MEN1	3512.98	1895.37	0.542	-0.883637	7.46613e-13	6.30801e-12
	DNMT3B	1121.02	438.926	0.396873	-1.33325	7.77419e-13	6.56447e-12
	AMTN	56.5909	333.965	5.32676	2.41326	8.50718e-13	7.17923e-12
	TMEM223	1310.91	557.353	0.430441	-1.21611	9.02884e-13	7.61504e-12
	TNIP1	2541.12	4621.28	1.80663	0.853303	9.34713e-13	7.87891e-12
	GUK1	4771.83	2664.65	0.560129	-0.836168	9.68146e-13	8.15127e-12
	LTV1	1418.39	620.641	0.44235	-1.17674	9.67834e-13	8.15127e-12
	LAMP3	15.9097	193.284	9.24002	3.2079	9.70022e-13	8.16234e-12
	MINK1	5795.37	9644.62	1.66085	0.731922	9.77886e-13	8.22375e-12
	USP15	1963.14	3612.2	1.83172	0.8732	9.81475e-13	8.24916e-12
	MIDN	3430.28	5995.59	1.73863	0.797951	9.94781e-13	8.35616e-12
	THAP4	2641.55	1346.66	0.511324	-0.96769	1.00292e-12	8.41962e-12
	PTPRK	9134.77	14994.6	1.63886	0.712695	1.02581e-12	8.60682e-12
	MEA1	4525.94	2496.22	0.554121	-0.851727	1.03971e-12	8.71842e-12
	CDC42EP2	429.325	76.6575	0.193623	-2.36868	1.08799e-12	9.11808e-12
	IFNAR2	840.648	283.739	0.346336	-1.52975	1.11088e-12	9.30452e-12
	EME1	673.203	203.087	0.310381	-1.68789	1.11719e-12	9.35193e-12
	DHX33	2729.86	1365.6	0.504191	-0.987958	1.12486e-12	9.41071e-12
	PRADC1	863.116	309.129	0.366166	-1.44943	1.12689e-12	9.42229e-12
	BYSL	2568.76	1311.7	0.514245	-0.959472	1.14833e-12	9.59156e-12
	MBD3	3197.28	1637.83	0.512373	-0.964733	1.14845e-12	9.59156e-12
	TMEM203	3174.47	1671.49	0.530401	-0.914846	1.15187e-12	9.61456e-12
	TLDC1	1285.93	2527.87	1.95217	0.965077	1.1581e-12	9.66099e-12
	UBA2	4243.4	2362.84	0.559088	-0.838852	1.1616e-12	9.6847e-12
	TMEM168	951.257	1979.13	2.06652	1.0472	1.18539e-12	9.87737e-12
	SLC27A2	1134.54	459.152	0.410887	-1.28319	1.18833e-12	9.89616e-12
	OVOL2	225.304	25.086	0.135132	-2.88756	1.22273e-12	1.01768e-11
	PIK3C2B	2515.22	4473.74	1.77227	0.825601	1.22826e-12	1.0217e-11
	CAPN15	4636.98	2564.02	0.553465	-0.853435	1.26534e-12	1.05194e-11
	SERPINH1	8818.38	5277.04	0.599566	-0.738009	1.28e-12	1.06352e-11
	CBLB	431.804	1120.6	2.54669	1.34863	1.28544e-12	1.06743e-11
	SLC7A1	8806.39	4772.42	0.537182	-0.896518	1.32901e-12	1.10298e-11
	NDUFAF4	975.023	364.19	0.379824	-1.3966	1.33233e-12	1.10511e-11
	SRSF10	3478.92	1814.41	0.523544	-0.933619	1.33614e-12	1.107e-11
	TBC1D9	3551.71	6102.72	1.71298	0.77651	1.336e-12	1.107e-11
	TGFA	432.322	1081.19	2.46185	1.29974	1.36741e-12	1.13226e-11
	TRIM5	175.529	594.281	3.26177	1.70565	1.4514e-12	1.20113e-11
	DDX26B	885.508	1867.26	2.08572	1.06055	1.47037e-12	1.21613e-11
	ORAI2	2170.88	1072.8	0.497537	-1.00713	1.47635e-12	1.22039e-11
	ACOX1	1383.91	2668.06	1.91955	0.940766	1.54423e-12	1.27576e-11
	C4orf46	516.155	137.597	0.278924	-1.84206	1.54511e-12	1.27577e-11
	ORAI1	1630.01	725.563	0.448107	-1.15809	1.60272e-12	1.32258e-11
	MYB	1345.6	575.031	0.432002	-1.21089	1.62854e-12	1.34313e-11
	DNAJA3	5888.22	3361.25	0.570665	-0.809284	1.75266e-12	1.44468e-11
	MAP3K14	885.393	1847.15	2.0695	1.04928	1.75724e-12	1.44763e-11
	C7orf50	5926.52	3444.63	0.582462	-0.779764	1.82338e-12	1.50126e-11
	RMI2	1569.1	706.169	0.454227	-1.13852	1.95145e-12	1.6058e-11
	SENP6	2692.81	4906.54	1.81089	0.856696	1.96202e-12	1.61359e-11
	MTRNR2L1	3404.53	6166.48	1.80771	0.854167	1.99054e-12	1.63612e-11
	IRAK1	16879.2	10448.4	0.619939	-0.689801	1.9963e-12	1.63992e-11
	SYNGR2	14087.8	8105.83	0.569356	-0.812596	2.05247e-12	1.68511e-11
	AHSA2	1992.47	3621.5	1.8102	0.856149	2.22124e-12	1.82264e-11
	CMTM3	186.699	636.349	3.24443	1.69797	2.22751e-12	1.82676e-11
	LCN15	0	81.8761	25.1448	4.65219	2.24377e-12	1.83905e-11
	LRFN1	549.635	152.964	0.290079	-1.78548	2.27585e-12	1.86429e-11
	FOXM1	5539.5	644.743	0.138155	-2.85564	2.29287e-12	1.87718e-11
	FYN	334.005	899.683	2.64168	1.40146	2.39593e-12	1.96045e-11
	MYBBP1A	4434.02	2444.32	0.54973	-0.863205	2.39808e-12	1.96111e-11
	HGFAC	45.7273	281.649	5.48633	2.45584	2.49438e-12	2.03872e-11
	TEAD3	2473.53	4411.5	1.77586	0.828519	2.50972e-12	2.0501e-11
	LURAP1L	1071.64	2157.41	1.99462	0.996115	2.53462e-12	2.06928e-11
	ZNF33B	894.6	1869.13	2.07283	1.0516	2.74413e-12	2.23906e-11
	SMG6	1464.94	2778.61	1.88474	0.914369	2.91733e-12	2.37904e-11
	EDEM1	1552.65	2949.7	1.89371	0.921213	2.94632e-12	2.40135e-11
	MPZL3	853.716	1784.13	2.07465	1.05287	3.03745e-12	2.47423e-11
	NKAIN1	740.05	237.661	0.329539	-1.60148	3.05195e-12	2.48465e-11
	CXCR2	0	80.6021	24.7608	4.62999	3.069e-12	2.49713e-11
	ZBTB7B	3967.71	6783.04	1.70529	0.770016	3.09749e-12	2.5189e-11
	ABCF2	4720.79	2700.08	0.574131	-0.800548	3.29589e-12	2.67874e-11
	S100A14	9791.03	16132.6	1.64087	0.714463	3.38867e-12	2.7526e-11
	LGR4	840.949	1766.32	2.08228	1.05817	3.39355e-12	2.75503e-11
	ELOVL6	1807.66	836.354	0.466414	-1.10032	3.3993e-12	2.75816e-11
	G2E3	1131.04	461.455	0.41468	-1.26993	3.54778e-12	2.87703e-11
	ISOC2	2687.63	1406.14	0.52679	-0.924699	3.57294e-12	2.8942e-11
	ZNF516	1208.86	2358.16	1.9381	0.954643	3.57252e-12	2.8942e-11
	SPSB4	132.302	5.05145	0.0718973	-3.79792	3.58219e-12	2.90007e-11
	CAST	4889.34	8244.63	1.67862	0.747277	3.63329e-12	2.93981e-11
	TIGD5	727.441	245.52	0.346727	-1.52813	3.67958e-12	2.9756e-11
	PLEKHF1	88.1332	391.863	4.15105	2.05348	3.70577e-12	2.99512e-11
	IDUA	572.559	1308.88	2.26597	1.18013	3.7401e-12	3.02119e-11
	NRGN	352.128	70.6287	0.217482	-2.20103	3.83259e-12	3.09418e-11
	CBR1	2851.07	1473.98	0.518297	-0.94815	3.84616e-12	3.10341e-11
	FLVCR2	1316.3	2533.06	1.91699	0.938845	3.91377e-12	3.15621e-11
	ARHGEF3	204.304	664.269	3.14344	1.65234	4.02712e-12	3.24582e-11
	SKA2	2409.26	1241.6	0.517993	-0.948995	4.04325e-12	3.25701e-11
	TDP1	1898.98	920.39	0.488551	-1.03342	4.14861e-12	3.34003e-11
	DDX55	2001.01	989.08	0.497888	-1.00611	4.15989e-12	3.34726e-11
	MAP3K6	1243.6	506.052	0.410322	-1.28517	4.16254e-12	3.34754e-11
	LOC100288637	323.83	59.2221	0.202227	-2.30595	4.18541e-12	3.36407e-11
	LINC00346	64.1631	328.818	4.69736	2.23185	4.47826e-12	3.59746e-11
	PDCD5	2115.39	946.359	0.448746	-1.15603	4.6238e-12	3.71233e-11
	SLC16A1	1336.91	587.098	0.444645	-1.16927	4.79986e-12	3.85155e-11
	RNASEH1	1699.94	781.879	0.462405	-1.11277	4.82029e-12	3.86368e-11
	ZMYM3	3037.17	1638.5	0.541877	-0.883962	4.81857e-12	3.86368e-11
	STK17A	392.988	992.084	2.48902	1.31558	4.88402e-12	3.9126e-11
	CD2AP	1425.91	2775.94	1.93521	0.952493	4.92008e-12	3.93932e-11
	ALMS1	2045.19	1012.17	0.497958	-1.0059	4.98029e-12	3.98533e-11
	UBC	30489.8	48317.5	1.57855	0.658597	5.01622e-12	4.01187e-11
	SPPL3	2522.44	4673.24	1.83461	0.875476	5.03471e-12	4.02445e-11
	FANCE	370.112	77.1132	0.225521	-2.14867	5.07217e-12	4.05216e-11
	MYO9B	3163.77	5807.37	1.81428	0.859396	5.16944e-12	4.1276e-11
	BRAT1	3734.68	2077.58	0.557859	-0.842027	5.17856e-12	4.13261e-11
	GALNT14	450.142	112.26	0.263668	-1.92321	5.30937e-12	4.23467e-11
	NEBL	2293.02	4055.29	1.76233	0.817482	5.44665e-12	4.34179e-11
	TOP3A	1616.02	754.327	0.471008	-1.08618	5.53884e-12	4.41285e-11
	BAG1	2603.58	4718.03	1.79997	0.847973	5.56971e-12	4.43501e-11
	LDLR	5192.5	8578.1	1.64565	0.71866	5.71929e-12	4.55163e-11
	PDAP1	6507.3	3843.63	0.590914	-0.758979	5.87936e-12	4.67646e-11
	MYO6	4319.42	7189.78	1.66004	0.731221	6.0756e-12	4.82991e-11
	MTO1	1243.85	2400.69	1.9182	0.939753	6.16025e-12	4.89452e-11
	DDX51	2097.37	1044.23	0.499554	-1.00129	6.2592e-12	4.96771e-11
	RUNX2	252.308	728.001	2.81551	1.49339	6.25817e-12	4.96771e-11
	GRPEL1	2511.78	1304.51	0.522402	-0.936768	6.40757e-12	5.08269e-11
	MND1	319.922	51.7265	0.180149	-2.47274	6.47775e-12	5.13555e-11
	DLC1	452.774	103.662	0.238995	-2.06495	6.7642e-12	5.35973e-11
	HIRA	2600.71	1371.02	0.530105	-0.91565	6.78381e-12	5.37234e-11
	RTKN	966.05	380.055	0.400055	-1.32173	6.79315e-12	5.3768e-11
	CCDC78	934.026	361.019	0.393216	-1.34661	6.80681e-12	5.38468e-11
	CGB7	0	77.6187	23.7273	4.56848	7.12765e-12	5.63542e-11
	RGS19	1364.84	529.413	0.393645	-1.34503	7.14548e-12	5.64645e-11
	UTP20	2128.84	1070.78	0.504092	-0.98824	7.3307e-12	5.78966e-11
	GOLGB1	4261.36	7946.86	1.84572	0.884187	7.61577e-12	6.01154e-11
	AXIN1	3163.37	1674.08	0.530037	-0.915834	7.83088e-12	6.17797e-11
	LOC100129034	1433.93	2713.94	1.88287	0.912933	7.86125e-12	6.19857e-11
	HEATR1	2863.08	1508.56	0.526278	-0.926104	7.88621e-12	6.21488e-11
	CEP152	633.675	201.662	0.328315	-1.60685	7.92033e-12	6.23838e-11
	ASNS	3013.74	5183.17	1.70788	0.77221	8.18061e-12	6.43991e-11
	EIF5AL1	4061.22	2115.73	0.517996	-0.948988	8.28636e-12	6.51962e-11
	KCNK2	205.057	20.5442	0.127987	-2.96593	8.36013e-12	6.57411e-11
	CACNG8	40.1654	259.192	5.6424	2.49631	8.8224e-12	6.93386e-11
	TSC22D2	1374.54	2617.49	1.89603	0.922981	8.93675e-12	7.01993e-11
	NT5DC2	6227.3	3606.76	0.581902	-0.781153	8.96444e-12	7.03789e-11
	TMEM123	5146.97	2985.4	0.579948	-0.786004	9.15248e-12	7.18163e-11
	KLF10	2243.98	4304.5	1.89218	0.92005	9.32988e-12	7.31688e-11
	IPO9	3750.73	2108.31	0.564694	-0.824458	9.44582e-12	7.40381e-11
	PLXNA4	54.5636	313.136	5.24564	2.39112	9.62012e-12	7.53637e-11
	LDHA	18999	10402.4	0.541121	-0.885977	9.74513e-12	7.63019e-11
	MIR21	29.679	254.724	6.9275	2.79234	9.95319e-12	7.7889e-11
	GNS	5981.34	9730.47	1.6254	0.700791	1.00422e-11	7.85429e-11
	MACC1	339.22	942.013	2.73404	1.45104	1.01747e-11	7.95369e-11
	HMGB3	5006.27	2889.9	0.580192	-0.785397	1.03164e-11	8.06014e-11
	MRPL55	1357.06	598.25	0.446241	-1.16411	1.03665e-11	8.09487e-11
	SIDT2	1688.88	3113.08	1.83313	0.874312	1.05172e-11	8.20815e-11
	PDXP	1493.55	683.848	0.461174	-1.11662	1.11531e-11	8.69979e-11
	TNFAIP8L1	315.04	57.4129	0.202737	-2.30232	1.12163e-11	8.74436e-11
	BCL7C	2998.55	1512.35	0.503537	-0.989831	1.13442e-11	8.83939e-11
	C17orf103	157.619	534.452	3.26776	1.7083	1.15108e-11	8.96434e-11
	TMEM38B	2304.49	1153.43	0.498217	-1.00515	1.15994e-11	9.02369e-11
	TSPAN6	2411.03	4275.22	1.75872	0.814529	1.15962e-11	9.02369e-11
	SNX21	550.345	1252.89	2.24657	1.16772	1.16342e-11	9.04593e-11
	FAM72B	159.203	11.4483	0.10269	-3.28363	1.18222e-11	9.18716e-11
	ANKRD39	1248.01	496.297	0.405101	-1.30365	1.18714e-11	9.22051e-11
	SLC7A10	0	76.2355	23.0949	4.52951	1.18849e-11	9.22607e-11
	LRRC20	986.909	396.634	0.408506	-1.29157	1.19001e-11	9.22843e-11
	MEPCE	5063.19	2964.69	0.58739	-0.76761	1.19007e-11	9.22843e-11
	SPRYD4	611.603	1377.27	2.22735	1.15533	1.20837e-11	9.36536e-11
	RPP40	940.197	363.517	0.392908	-1.34773	1.22069e-11	9.45583e-11
	KRT4	30.924	228.854	6.29526	2.65427	1.2329e-11	9.54531e-11
	PLA2G4F	113.966	451.995	3.75002	1.9069	1.26395e-11	9.78046e-11
	EPHA4	3347.79	5698.96	1.69881	0.764527	1.29386e-11	1.00066e-10
	LOC642846	363.848	79.3403	0.234587	-2.0918	1.32927e-11	1.0275e-10
	PAPD7	2232.84	1146.95	0.51644	-0.953328	1.34017e-11	1.03537e-10
	SUCO	3624.41	6084.21	1.67431	0.743568	1.35826e-11	1.04879e-10
	GAN	676.627	1456.23	2.13198	1.09219	1.38977e-11	1.07255e-10
	STX3	1499.2	2782.93	1.84829	0.886194	1.40368e-11	1.08271e-10
	NOS1AP	269.168	749.439	2.71993	1.44357	1.41028e-11	1.08722e-10
	RRN3	2972.76	1590.93	0.537209	-0.896446	1.41562e-11	1.09076e-10
	PKN3	1005.13	408.045	0.41235	-1.27806	1.41966e-11	1.0933e-10
	SCAF1	3562	1999.32	0.563019	-0.828745	1.4205e-11	1.09337e-10
	ARMC6	2290.54	1186.27	0.521616	-0.938941	1.43256e-11	1.10206e-10
	CHST10	747.273	253.301	0.346539	-1.52891	1.45192e-11	1.11577e-10
	TRIM14	940.415	363.071	0.390872	-1.35523	1.45121e-11	1.11577e-10
	IGSF8	1429.01	565.527	0.400978	-1.3184	1.45396e-11	1.11675e-10
	FOXRED2	2359.09	1227.5	0.523442	-0.933899	1.46115e-11	1.12168e-10
	NLRX1	123.798	475.703	3.62574	1.85828	1.47514e-11	1.13182e-10
	AZIN1	7656.91	4628.55	0.604954	-0.725102	1.50032e-11	1.15054e-10
	FLNA	108910	169134	1.54736	0.629805	1.505e-11	1.15351e-10
	LDLRAD1	4.72195	123.203	13.578	3.76319	1.50589e-11	1.15359e-10
	TNFAIP2	667.121	1495.02	2.22853	1.15609	1.51988e-11	1.16369e-10
	DCTN4	1895.19	3408.74	1.79178	0.841392	1.52259e-11	1.16515e-10
	POLR2F	2983	1627.34	0.547738	-0.868442	1.5854e-11	1.21258e-10
	BBS1	603.892	1337.72	2.19387	1.13347	1.6007e-11	1.22364e-10
	HSPA1A	4675.62	2702.58	0.581019	-0.783344	1.61896e-11	1.23694e-10
	NAA15	3077.28	1682.11	0.550111	-0.862207	1.62589e-11	1.24159e-10
	SLC35E2	631.518	1393.07	2.17635	1.12191	1.62773e-11	1.24234e-10
	TINCR	2151.56	3799.78	1.76452	0.819278	1.64763e-11	1.25687e-10
	SERINC3	3953.27	6561.2	1.6549	0.726747	1.661e-11	1.2664e-10
	PCAT6	128.65	526.708	3.7529	1.908	1.66438e-11	1.26831e-10
	UCK1	3424.11	1909	0.560191	-0.83601	1.67152e-11	1.27309e-10
	SPPL2A	3254.2	5555.49	1.69894	0.764631	1.68783e-11	1.28484e-10
	BMP1	1500.01	2784.97	1.84587	0.884301	1.736e-11	1.32082e-10
	SPECC1	2336.34	4323.27	1.84465	0.883346	1.77635e-11	1.35081e-10
	GRID1	2.57309	109.231	16.2301	4.0206	1.7796e-11	1.35257e-10
	TMPO-AS1	331.534	66.0868	0.2176	-2.20025	1.84428e-11	1.401e-10
	OXNAD1	770.156	278.228	0.36971	-1.43553	1.87439e-11	1.42312e-10
	PLP2	4770.01	2768.9	0.579342	-0.787513	1.8919e-11	1.43567e-10
	MPRIP	3522.91	5906.66	1.67024	0.740057	1.93684e-11	1.46824e-10
	PBXIP1	1768.19	3376.11	1.89775	0.924286	1.93669e-11	1.46824e-10
	GAS2L3	312.985	60.3586	0.211803	-2.2392	1.97123e-11	1.49353e-10
	LIPA	3143.19	5517.37	1.73113	0.791718	1.97328e-11	1.4943e-10
	MNS1	203.993	21.1293	0.13136	-2.9284	1.98876e-11	1.50524e-10
	DNAH1	175.271	597.985	3.25874	1.70432	2.01414e-11	1.52366e-10
	ISPD	33.9405	233.286	5.93041	2.56813	2.04212e-11	1.54402e-10
	LSM4	7148.83	4314.82	0.604277	-0.726719	2.06228e-11	1.55845e-10
	S100A4	360.936	978.771	2.62977	1.39494	2.10098e-11	1.58687e-10
	HNRNPA0	7889.37	4827.4	0.613923	-0.70387	2.15774e-11	1.6289e-10
	LOC100128494	27.0782	210.457	6.49957	2.70034	2.17541e-11	1.64138e-10
	ARHGEF10L	1752.2	3160.44	1.79362	0.842872	2.22524e-11	1.67811e-10
	TFPI2	610.243	178.97	0.305101	-1.71264	2.25747e-11	1.70153e-10
	NXPH4	329.699	67.0521	0.221617	-2.17386	2.31532e-11	1.74423e-10
	ZFPM1	746.435	1569.11	2.08471	1.05985	2.35985e-11	1.77686e-10
	CYP4B1	35.4434	238.781	5.81454	2.53967	2.41309e-11	1.816e-10
	ITPKA	293.914	39.8562	0.157173	-2.66958	2.41821e-11	1.81891e-10
	MERTK	61.9503	341.516	4.93109	2.30191	2.46929e-11	1.85637e-10
	SNAPC4	3020.6	1665.09	0.55337	-0.853683	2.48462e-11	1.86693e-10
	SEMA3F	7086.55	11296.3	1.59009	0.669112	2.52419e-11	1.89569e-10
	KIF3C	1687.5	3052.39	1.79977	0.847812	2.52756e-11	1.89724e-10
	ABCC2	67.1604	337.42	4.58673	2.19747	2.54056e-11	1.90601e-10
	MGRN1	3241.42	5512.95	1.69636	0.762446	2.56085e-11	1.92024e-10
	FANCL	665.702	225.41	0.349098	-1.5183	2.62754e-11	1.96923e-10
	USP13	1649.13	794.305	0.485062	-1.04376	2.65814e-11	1.99114e-10
	GATA3	27507.3	42241.8	1.53351	0.616836	2.67305e-11	2.00128e-10
	ATG9B	98.8882	411.817	3.86804	1.9516	2.69218e-11	2.01456e-10
	NSUN2	5608.64	3343.07	0.596537	-0.745318	2.70362e-11	2.02208e-10
	SHPK	2079.34	1046.35	0.506354	-0.981781	2.81024e-11	2.10074e-10
	OSTM1	1005.91	1983.01	1.95998	0.970838	2.83981e-11	2.12175e-10
	KLF7	182.53	574.81	3.04624	1.60703	2.84193e-11	2.12225e-10
	GNAZ	491.733	139.197	0.296047	-1.7561	2.90377e-11	2.16732e-10
	DPF1	287.898	50.5064	0.194778	-2.3601	2.91997e-11	2.17829e-10
	PRR12	2211.24	1148.51	0.523312	-0.934257	2.9215e-11	2.17831e-10
	GNA13	3942.37	6543.5	1.65261	0.724745	2.94494e-11	2.19466e-10
	S100A6	679.942	1485.09	2.16888	1.11695	2.96038e-11	2.20503e-10
	GPR19	114.862	3.95677	0.072336	-3.78914	3.03592e-11	2.26014e-10
	LOC101927501	0.848458	86.3762	19.1718	4.26092	3.04482e-11	2.26561e-10
	ILVBL	4272.38	2471.36	0.579862	-0.786218	3.04905e-11	2.2676e-10
	POLR2I	2708.67	1421.19	0.526719	-0.924896	3.10193e-11	2.30574e-10
	SIAE	987.705	1942.64	1.95336	0.96596	3.13519e-11	2.32927e-10
	NUP93	2213.52	1146.37	0.522021	-0.937821	3.19157e-11	2.36995e-10
	KCTD1	776.101	1655.38	2.11063	1.07768	3.21433e-11	2.38563e-10
	NTF4	19.7832	185.413	7.4357	2.89447	3.26845e-11	2.42456e-10
	ELAC2	5369.04	3150.49	0.58743	-0.767511	3.28695e-11	2.43704e-10
	CRKL	2448.31	4235.74	1.72401	0.785772	3.37071e-11	2.49774e-10
	KCNS3	367.18	83.2175	0.243365	-2.03881	3.37225e-11	2.49774e-10
	LINC00052	2860.37	1499.01	0.526506	-0.925478	3.40189e-11	2.51841e-10
	TBC1D2	766.734	1601.34	2.07007	1.04968	3.48587e-11	2.57926e-10
	KIAA1462	135.547	497.86	3.52954	1.81948	3.53978e-11	2.61782e-10
	TRIP6	2173.81	3788.31	1.73609	0.795841	3.55967e-11	2.63118e-10
	NHP2L1	4556.53	2641.6	0.581567	-0.781982	3.65438e-11	2.69982e-10
	RPN1	19036.9	12203.3	0.643072	-0.636948	3.67107e-11	2.71077e-10
	THAP11	2110.05	1034.39	0.493847	-1.01786	3.72443e-11	2.74877e-10
	RFC1	2392.92	1225.76	0.511922	-0.966003	3.80255e-11	2.80501e-10
	MLLT6	3690.77	2102.94	0.571723	-0.806612	3.83904e-11	2.83049e-10
	IGFL3	0	72.3205	21.69	4.43896	3.85341e-11	2.83965e-10
	CENPH	1227.48	548.237	0.451351	-1.14768	3.86754e-11	2.84861e-10
	ZFAND5	1876.37	3501.46	1.85261	0.889561	3.91468e-11	2.88187e-10
	PTPN3	2487.87	4329.09	1.73246	0.792822	3.92635e-11	2.889e-10
	FLAD1	3788.08	2173.8	0.576095	-0.795622	3.95846e-11	2.91115e-10
	ME1	1444.29	2683.46	1.85	0.887528	4.00925e-11	2.94701e-10
	SART1	4387.57	2411.16	0.544723	-0.876404	4.03044e-11	2.96109e-10
	WDR24	1103.57	469.181	0.428824	-1.22154	4.0636e-11	2.98395e-10
	KIAA1432	1129.02	2162.64	1.90322	0.928441	4.08877e-11	3.00091e-10
	ZNF333	178.518	565.288	3.05728	1.61225	4.11846e-11	3.02117e-10
	NPTX1	145.425	9.72273	0.100069	-3.32094	4.31336e-11	3.16255e-10
	TPM3	8726.36	5320.83	0.611214	-0.710251	4.34777e-11	3.18618e-10
	EMC9	1110.57	449.388	0.410829	-1.28339	4.36164e-11	3.19472e-10
	DLL1	554.393	140.067	0.259797	-1.94454	4.65698e-11	3.40933e-10
	MTFP1	1669.11	816.294	0.493302	-1.01946	4.67008e-11	3.4172e-10
	LINC00925	137.642	482.288	3.35401	1.74589	4.68663e-11	3.42759e-10
	KRI1	2178.29	1134.77	0.522899	-0.935397	4.7231e-11	3.45252e-10
	SDC1	12591.1	19849	1.57496	0.655312	4.72654e-11	3.4533e-10
	CIRH1A	3555.21	1966.69	0.555693	-0.847639	4.89275e-11	3.57294e-10
	NDUFB10	7696.22	4730.04	0.616704	-0.697349	4.98183e-11	3.63616e-10
	SMCHD1	1999.83	1029.13	0.518018	-0.948925	5.06162e-11	3.69254e-10
	RAC3	1010.1	415.285	0.417867	-1.25889	5.10251e-11	3.72051e-10
	TNFAIP8	167.92	562.709	3.2038	1.67978	5.29093e-11	3.85596e-10
	HNRNPUL1	15060.8	9566.99	0.635241	-0.654624	5.3014e-11	3.86165e-10
	KAZN	569.499	1281.25	2.22751	1.15543	5.3345e-11	3.88381e-10
	DNAJC1	3464.88	1869.14	0.544636	-0.876636	5.38609e-11	3.91941e-10
	BRWD1	4066.13	7081.63	1.72744	0.788636	5.45587e-11	3.9682e-10
[truncated: 5,254 more rows]

## Sheet: SJSA
Total RNA-seq - SJSA - DESeq2 Results (Nutlin vs. DMSO) - Refseq genes - padj < 0.05
	Gene ID	Base Mean DMSO	Base Mean Nutlin	Fold Change	Fold Change (log2)	p	padj
	BTG2	347.096	12773.1	35.8498	5.16389	0	0
	CDKN1A	5142.6	177629	33.6247	5.07145	0	0
	GDF15	602.014	42423.7	68.8226	6.10481	0	0
	KRT4	39.5613	14338.4	322.26	8.33208	0	0
	MDM2	46225.9	1.05313e+06	22.4563	4.48905	0	0
	FDXR	735.373	12791.5	17.0483	4.09155	6.59707e-279	1.78198e-275
	TP53INP1	228.066	9204.05	38.9642	5.28408	6.68037e-241	1.5467e-237
	RRM2B	993.373	13461.4	13.3554	3.73935	5.81469e-237	1.17798e-233
	CYFIP2	736.542	11403	15.2073	3.92669	4.6844e-236	8.43557e-233
	IFITM10	36.3928	3991.51	99.4509	6.63591	8.61684e-230	1.39653e-226
	AVIL	398.225	8858.52	21.682	4.43843	2.05253e-228	3.02413e-225
	KRT79	1696.25	21155.1	12.1279	3.60026	2.11022e-215	2.85003e-212
	CREBRF	438.022	6814.46	15.2305	3.92889	9.99985e-201	1.24667e-197
	NOTCH1	1327.38	13319.7	9.90772	3.30855	4.33892e-199	5.02293e-196
	INPP5D	254.911	5005.55	19.0982	4.25536	2.30999e-198	2.49587e-195
	ACTA2	925.089	10076.8	10.7538	3.42677	3.07367e-192	3.11344e-189
	PVRL4	25.3846	2765.08	95.8581	6.58283	2.71315e-173	2.58659e-170
	SESN1	525.57	6221.56	11.6198	3.53852	1.36758e-168	1.23135e-165
	SULF2	659.707	7165.49	10.686	3.41765	4.01116e-168	3.42152e-165
	BBC3	199.604	3977.96	19.2638	4.26782	1.04438e-167	8.46317e-165
	TRIM22	1896.28	15372.1	8.03298	3.00594	5.40646e-166	4.1725e-163
	TP53I3	405.088	5395.6	12.9884	3.69915	6.35604e-162	4.68238e-159
	DISP2	66.4577	2666.87	37.515	5.22939	2.1345e-150	1.50408e-147
	CUX2	21.3298	2350.75	93.7973	6.55147	2.88218e-146	1.94631e-143
	HSPA4L	545.961	5623.6	10.1146	3.33837	4.59918e-146	2.98156e-143
	ZMAT3	1050.62	8591.83	8.0712	3.01278	1.24695e-140	7.7728e-138
	KIAA1324	202.163	3490.91	16.7448	4.06564	2.1401e-138	1.28462e-135
	TRPV1	54.0329	2198.52	37.6159	5.23327	5.22322e-138	3.02331e-135
	EPPK1	63.6722	2304.98	33.5021	5.06618	2.41865e-136	1.35169e-133
	RRM2	13406.4	1919.45	0.143972	-2.79614	2.61069e-128	1.41038e-125
	FAM212B	425.153	4370.65	10.0688	3.33182	3.06602e-127	1.60294e-124
	CELF5	28.2834	1786.48	55.6844	5.7992	1.64308e-124	8.32169e-122
	HGFAC	27.336	1871.91	59.8291	5.90278	5.42533e-122	2.6645e-119
	KLHDC7A	103.75	2237.15	20.5031	4.35777	6.1945e-122	2.95277e-119
	NEB	7.00567	2503.51	242.811	7.92369	8.43101e-122	3.90404e-119
	OPRL1	56.8751	1912.58	31.2042	4.96367	9.56929e-120	4.30804e-117
	SESN2	625.474	5313.78	8.31484	3.05569	5.00626e-117	2.19288e-114
	SPATA18	32.1251	1767.55	48.6815	5.6053	2.75444e-116	1.17477e-113
	OBSCN	62.1423	2015.14	29.9351	4.90376	5.58725e-116	2.32186e-113
	CPEB4	1062.12	7352.79	6.82297	2.7704	6.80779e-116	2.75834e-113
	FAM111B	3134.74	255.834	0.0840502	-3.5726	1.13958e-113	4.50468e-111
	TNFSF9	639.489	6454.84	9.72134	3.28115	2.13528e-112	8.23964e-110
	LMNB1	8073.01	1209.75	0.151643	-2.72125	1.07792e-111	4.06277e-109
	FAT2	4.0026	2493.33	353.739	8.46654	1.12024e-111	4.1263e-109
	RYR1	5.79312	2131.55	240.512	7.90997	2.96682e-111	1.06852e-108
	DNAH1	243.458	3298.63	13.0609	3.70718	1.47049e-108	5.18091e-106
	DIDO1	3677.24	18121.5	4.88867	2.28944	3.89902e-108	1.3445e-105
	BAX	2502.63	13799.8	5.45687	2.44807	7.88702e-108	2.66302e-105
	SH2B3	7277.94	34608.7	4.72103	2.2391	8.60804e-108	2.84715e-105
	ACAN	8.84833	1703.53	141.31	7.14272	1.99404e-107	6.46348e-105
	AEN	2406.98	12819.7	5.28295	2.40134	8.01166e-106	2.54598e-103
	FSTL4	308.175	3579.73	11.372	3.50742	9.38766e-105	2.92588e-102
	ZNF300P1	3.05521	2553.65	407.069	8.66913	9.07305e-104	2.77447e-101
	TSGA10IP	3.05521	2435.02	390.969	8.61091	6.95714e-103	2.08804e-100
	GADD45A	2087.69	14547.6	6.7802	2.76133	9.95083e-103	2.93224e-100
	POLH	1566.91	9009.78	5.69412	2.50947	1.98886e-101	5.75597e-99
	C12orf5	917.512	5929.73	6.37258	2.67188	2.27881e-101	6.47941e-99
	KIF1A	90.7996	1821.35	18.8853	4.23919	3.72851e-101	1.04186e-98
	DBH-AS1	232.233	3412.88	14.1109	3.81874	6.3023e-101	1.73121e-98
	MCM6	6545.39	1060.98	0.164112	-2.60725	7.89123e-101	2.13155e-98
	MARCH9	15206.1	2735.1	0.181397	-2.46278	8.76234e-101	2.32805e-98
	ZNF79	262.325	2777.22	10.2921	3.36346	2.70462e-99	7.06996e-97
	CCNA2	6247.7	857.205	0.138347	-2.85363	4.67543e-99	1.20277e-96
	TNXB	43.2942	1524.64	31.9395	4.99727	5.86691e-99	1.4857e-96
	CDCA7	3218.18	317.205	0.101024	-3.30723	9.77583e-99	2.43749e-96
	TNFRSF10D	4974.09	21960.7	4.38595	2.13289	1.64698e-98	4.04433e-96
	RRAD	64.8326	1592.17	22.858	4.51463	1.78985e-97	4.32957e-95
	PLXNB2	5557.75	24121.6	4.31076	2.10794	3.08165e-97	7.34475e-95
	PPM1D	807.424	5299.33	6.45835	2.69117	3.61501e-97	8.49109e-95
	DDB2	1275.73	7122.46	5.51977	2.46461	1.35745e-95	3.14289e-93
	FBXW7	688.57	5038.69	7.20648	2.84929	7.15425e-95	1.63308e-92
	EPHA2	4786.59	20781.4	4.30404	2.10569	6.39448e-94	1.43938e-91
	LOC101927583	10.4258	1505.78	109.192	6.77073	9.47523e-93	2.10363e-90
	RNF213	11788.9	54334.7	4.54854	2.1854	3.56329e-92	7.80408e-90
	PHLDA3	890.536	5667.01	6.24913	2.64366	3.81983e-92	8.25439e-90
	ASCC3	3042.82	13735.6	4.47707	2.16255	5.03941e-92	1.07465e-89
	UCKL1-AS1	15.4279	1444.02	76.0079	6.24808	1.06577e-91	2.24323e-89
	DNAH17	50.726	1702.55	30.5475	4.93298	1.59491e-91	3.31395e-89
	SMG1	5362.34	22642.9	4.18908	2.06663	2.66494e-91	5.46717e-89
	IRGQ	800.346	5002.76	6.16168	2.62332	4.0179e-91	8.13976e-89
	RGS12	2249.85	11048.3	4.85471	2.27939	5.81404e-90	1.16331e-87
	FAS	425.996	3538.79	8.0802	3.01439	1.83719e-88	3.63114e-86
	LAMC2	131.934	1880.62	13.6364	3.76939	1.9169e-88	3.74305e-86
	CEP85L	343.263	2949.63	8.38951	3.06859	2.23392e-88	4.31014e-86
	SLC9A1	1599.25	8817.74	5.44642	2.44531	1.77538e-87	3.38513e-85
	STX1B	80.0565	1595.45	18.6922	4.22436	1.91852e-87	3.61552e-85
	GREB1	93.8414	1821.28	18.2409	4.18911	3.05829e-87	5.69721e-85
	CPNE7	10.0609	1284.92	95.1151	6.5716	7.47025e-87	1.3758e-84
	PSTPIP2	628.626	4828.69	7.51365	2.90951	8.01133e-87	1.45887e-84
	VWCE	27.8052	1245.56	39.1912	5.29246	2.25521e-86	4.06113e-84
	ZNF605	41.7644	1462.93	30.6916	4.93977	3.36501e-86	5.99304e-84
	PLA2G6	148.731	2014.78	12.8548	3.68423	6.18992e-86	1.09043e-83
	PLK1	5383.72	819.187	0.153581	-2.70293	2.50877e-85	4.37201e-83
	GRIN2C	3.15948	1628.1	261.754	8.03207	2.39512e-84	4.12954e-82
	CD22	587.596	3898.76	6.52718	2.70646	4.34193e-84	7.33934e-82
	CDK5R1	258.8	2455.31	9.20038	3.20169	4.34736e-84	7.33934e-82
	MCM3	11075.9	2417.91	0.219926	-2.18491	2.80979e-83	4.69467e-81
	PSRC1	3294.79	331.641	0.103119	-3.27761	3.56211e-82	5.89094e-80
	KIAA0247	959.441	5278.03	5.42961	2.44085	5.14997e-82	8.43086e-80
	VWF	96.0103	1527.68	15.0262	3.90941	1.76564e-80	2.86157e-78
	TMEM51-AS1	83.3158	1500.94	16.838	4.07365	2.0888e-80	3.3518e-78
	PYGM	26.4407	1130.14	37.0268	5.2105	1.10052e-79	1.74864e-77
	FOXD2-AS1	496.035	3487.92	6.86896	2.78009	1.15779e-79	1.82178e-77
	ATF3	406.278	3039.01	7.28182	2.8643	3.32414e-79	5.18022e-77
	VCPIP1	952.701	5090.01	5.2751	2.3992	3.41822e-79	5.2761e-77
	SDCBP2-AS1	117.639	1666.81	13.5576	3.76102	3.82117e-78	5.84242e-76
	KMT2C	1988.44	9292.02	4.6155	2.20649	3.99952e-78	6.05796e-76
	ARHGAP27	109.856	1552.73	13.4313	3.74752	2.85805e-77	4.28893e-75
	C3orf67	96.4795	1497.75	14.6679	3.87459	3.84806e-77	5.72161e-75
	TNFRSF10B	8038.07	28798.7	3.56217	1.83276	7.08717e-77	1.0442e-74
	PTCH1	6891.32	25829.8	3.71392	1.89294	8.77853e-77	1.28174e-74
	LOC101928766	6.11042	1139.26	121.539	6.92527	2.18716e-76	3.16493e-74
	ABCA1	2273.4	11390.5	4.9392	2.30428	3.54933e-76	5.09062e-74
	ANKRD33B	3186.86	13446.2	4.18675	2.06583	5.50679e-76	7.82882e-74
	PTP4A1	2576.15	10772	4.14165	2.05021	5.64903e-76	7.9612e-74
	SIK1	1013.23	5224.02	5.09327	2.34859	1.71743e-74	2.39951e-72
	PRDM1	79.2476	1823.47	21.2321	4.40818	1.02867e-73	1.42493e-71
	FAM186B	14.3763	1062.9	58.4543	5.86924	1.15017e-73	1.57973e-71
	SBNO1	1530.77	7177.62	4.63862	2.2137	1.36095e-73	1.85352e-71
	DLGAP5	4147.39	640.455	0.156671	-2.67419	4.63146e-73	6.25517e-71
	EDA2R	677.031	4512.91	6.52993	2.70707	8.62501e-73	1.15525e-70
	XPC	1685.92	7333.44	4.31002	2.1077	1.12213e-72	1.49069e-70
	REV3L	1935.76	8933.3	4.55396	2.18712	1.8061e-71	2.3798e-69
	MAP2K3	2008.65	8598.97	4.23336	2.0818	2.04745e-71	2.67606e-69
	ZNF300	516.925	3517.91	6.67275	2.73828	1.49919e-70	1.94379e-68
	RCC1	3140.09	12830.1	4.03769	2.01353	1.1378e-69	1.46352e-67
	INHBB	126.81	1682.12	12.5694	3.65185	1.38986e-69	1.77365e-67
	PPP1R10	2176.87	8626.24	3.93143	1.97505	1.32119e-68	1.67285e-66
	HMGB2	11901.7	3117.88	0.264176	-1.92043	1.81117e-68	2.27547e-66
	SLC8A2	7.90093	915.511	81.3813	6.34662	7.41897e-68	9.24917e-66
	PHF19	4907.57	985.286	0.202999	-2.30046	1.10671e-67	1.3692e-65
	KCNQ1OT1	954.41	4701.23	4.86638	2.28285	1.8074e-67	2.21913e-65
	MSH4	14.6414	867.378	47.5104	5.57017	3.67599e-67	4.47945e-65
	PKD1L1	26.3841	1001.03	32.3308	5.01484	6.39553e-67	7.73525e-65
	PATZ1	1555.83	134.646	0.0906362	-3.46377	7.33381e-67	8.80437e-65
	ABL2	3982.43	14689.9	3.65999	1.87184	1.0056e-66	1.19837e-64
	KIF22	5873.62	1327.19	0.227914	-2.13344	1.30425e-66	1.54292e-64
	TBX4	6.74051	859.436	87.6503	6.45369	2.35098e-66	2.76104e-64
	ARHGEF40	5502.97	1195.86	0.219044	-2.19071	2.38075e-66	2.77589e-64
	FCGBP	0.89526	1192.17	312.123	8.28597	1.99967e-65	2.3149e-63
	DNHD1	255.514	2347.01	8.8495	3.1456	3.62738e-65	4.16943e-63
	AHRR	382.781	2568.23	6.56653	2.71513	4.67156e-65	5.33183e-63
	TTC18	21.5429	891.352	34.8456	5.1229	5.00378e-65	5.67107e-63
	CRAMP1L	1853.59	7355.76	3.93319	1.9757	6.53482e-65	7.35485e-63
	BIRC6	4352.47	16063.6	3.65544	1.87005	8.96226e-65	1.00173e-62
	DEK	9597.72	2486.98	0.260773	-1.93913	9.91172e-65	1.10027e-62
	TOB1	338.356	2354.48	6.77817	2.7609	1.63068e-64	1.79786e-62
	SAPCD2	2073.54	234.805	0.11675	-3.0985	9.09095e-64	9.9552e-62
	GPR87	53.872	1052.76	17.9575	4.16651	1.62094e-63	1.76313e-61
	OVGP1	50.0779	1096.7	19.9759	4.32019	3.98999e-63	4.31105e-61
	TCF19	3289.56	611.212	0.188844	-2.40473	9.83997e-63	1.05614e-60
	SMCR8	2174.59	8256.05	3.76636	1.91317	1.41823e-62	1.51219e-60
	FER1L6	10.2694	768.258	56.6256	5.82338	2.18819e-62	2.31791e-60
	PLK2	2558.59	9508.93	3.67271	1.87685	2.43714e-62	2.56485e-60
	ESRRB	3.15948	919.957	148.743	7.21667	2.71124e-62	2.83491e-60
	CCNB1	7101.47	1550.76	0.220446	-2.1815	2.79656e-62	2.90537e-60
	TMPO	7198.67	1444.22	0.202496	-2.30403	3.64925e-62	3.76709e-60
	MCM4	12497.5	3634.75	0.292728	-1.77237	4.24015e-62	4.34937e-60
	AURKB	3383.58	572.897	0.171747	-2.54165	8.9198e-62	9.09202e-60
	SLC30A1	582.515	3150.16	5.31433	2.40989	1.20804e-61	1.22367e-59
	OTUD3	1100.54	4844.6	4.35307	2.12203	1.2758e-61	1.28427e-59
	FNIP1	2380.97	8738.22	3.639	1.86354	4.47866e-61	4.4806e-59
	LAD1	0	1201.5	405.574	8.66382	6.52949e-61	6.49224e-59
	KIFC1	6018.14	955.62	0.159819	-2.64549	6.88935e-61	6.80827e-59
	HDAC9	2484.6	9040	3.60912	1.85165	7.22953e-61	7.10115e-59
	TLL2	42.6075	929.876	19.652	4.29661	8.11574e-61	7.9236e-59
	CES3	6.63625	757.213	77.3159	6.27269	8.20146e-61	7.95934e-59
	EPHB3	336.101	2263.36	6.56201	2.71414	1.05627e-60	1.01899e-58
	COL11A2	219.191	1777.97	7.84944	2.97259	1.24743e-60	1.19627e-58
	RPS27L	2293.03	9254.67	3.9882	1.99574	2.00708e-60	1.91345e-58
	FAT1	19649.9	60014.9	3.03641	1.60237	2.5787e-60	2.44404e-58
	GPX8	2678.83	436.403	0.166114	-2.58975	3.53595e-60	3.33181e-58
	CCDC88B	58.0876	1027.06	16.2599	4.02325	3.86316e-60	3.61909e-58
	SERPINF2	10.5867	734.255	52.343	5.70992	1.9046e-59	1.77401e-57
	ZFC3H1	2428.7	9084.87	3.70813	1.89069	3.19908e-59	2.96271e-57
	CDC42BPG	16.4886	872.01	42.0884	5.39535	4.54448e-59	4.18479e-57
	EXOC8	637.178	3202.79	4.94923	2.3072	1.8196e-58	1.66612e-56
	LOC100130075	46.762	5390.86	79.0601	6.30488	2.97988e-58	2.7132e-56
	ZNF654	584.992	3084.93	5.17758	2.37228	3.17826e-58	2.87766e-56
	DUSP14	867.042	4197.88	4.74245	2.24563	4.27425e-58	3.84849e-56
	DLX3	55.089	988.025	16.306	4.02733	1.00763e-57	9.02242e-56
	ARMCX2	1502.66	147.564	0.102623	-3.28457	1.34255e-57	1.19554e-55
	PAQR4	1546.35	165.091	0.111272	-3.16784	1.42736e-57	1.26411e-55
	CCNK	1799.03	6679.04	3.68157	1.88032	1.62564e-57	1.43189e-55
	KIF20A	7570.02	1601.63	0.211682	-2.24003	1.67838e-57	1.47035e-55
	BLCAP	1700.12	6476.39	3.76427	1.91237	2.01751e-57	1.75794e-55
	KSR2	45.6537	1082.65	21.1952	4.40566	2.85774e-57	2.47676e-55
	UNG	1795.91	222.754	0.1283	-2.96241	3.98404e-57	3.43454e-55
	SDPR	174.075	1825.49	10.2099	3.3519	4.95457e-57	4.24861e-55
	TRIAP1	969.595	5143.71	5.20128	2.37887	2.7136e-56	2.3147e-54
	KIF11	5577.64	1099.61	0.19842	-2.33337	2.89966e-56	2.46046e-54
	ARC	26.8057	796.579	25.5844	4.67719	3.53322e-56	2.98244e-54
	WDR81	1114.68	4586.18	4.0711	2.02542	4.94293e-56	4.15078e-54
	PTCHD4	46.7054	5304.49	77.4781	6.27572	1.00931e-55	8.43193e-54
	LTBP2	583.584	2925.29	4.9319	2.30214	2.83881e-55	2.35942e-53
	CEP55	4815.03	1193.09	0.250635	-1.99634	3.29142e-55	2.72164e-53
	HMCN2	266.361	1902.77	6.95243	2.79752	4.78448e-55	3.93615e-53
	FER1L4	16.2711	741.946	36.9796	5.20866	6.58375e-55	5.38903e-53
	PLCH2	8.69193	714.889	58.0651	5.8596	7.5568e-55	6.15442e-53
	ANP32A	5754.05	1374.05	0.241401	-2.05049	1.44865e-54	1.17391e-52
	SLFN5	2393.05	8378.6	3.46583	1.7932	2.26985e-54	1.83022e-52
	SLC5A5	2.63364	707.823	125.921	6.97637	5.37374e-54	4.3115e-52
	E2F1	3071.27	630.195	0.20868	-2.26064	8.12561e-54	6.48728e-52
	ZNF596	260.611	1983.4	7.40743	2.88897	8.38609e-54	6.66242e-52
	KMT2D	7459.49	22209.9	2.9606	1.56589	1.83202e-53	1.44837e-51
	SLC1A7	200.912	1556.72	7.48526	2.90405	2.28772e-53	1.79986e-51
	LOC100507156	73.2639	1005.32	12.7595	3.6735	2.67403e-53	2.09362e-51
	SLC12A4	3350.25	10782	3.19951	1.67785	2.72049e-53	2.11976e-51
	CDCA7L	2620.47	413.282	0.16154	-2.63003	3.79875e-53	2.94576e-51
	MAFF	3149.83	11505.9	3.60753	1.85101	4.4582e-53	3.44067e-51
	MAP1A	5825.33	18402.2	3.14711	1.65403	5.11184e-53	3.92643e-51
	ASB8	10000.2	3051.06	0.30674	-1.70491	7.49273e-53	5.72805e-51
	PPP1R15A	3724.58	13896.7	3.67941	1.87947	2.78347e-52	2.11792e-50
	CTRC	5.95401	670.524	71.138	6.15255	5.36502e-52	4.06312e-50
	ESPL1	3934.46	836.849	0.214004	-2.22429	1.09205e-51	8.23206e-50
	SYNC	4595.88	14075.2	3.04153	1.6048	1.32117e-51	9.91304e-50
	MSH6	3988.27	957.827	0.242793	-2.0422	1.79116e-51	1.33776e-49
	CCNB2	3008.95	566.652	0.189841	-2.39714	1.96093e-51	1.45784e-49
	TLE4	794.938	3504.55	4.33473	2.11594	2.36801e-51	1.75243e-49
	KIF2C	5721.23	1158.93	0.202453	-2.30434	4.96849e-51	3.6602e-49
	PSD2	50.5651	850.166	15.198	3.92581	7.84915e-51	5.74646e-49
	PTAFR	200.686	1603.35	7.73632	2.95165	7.87138e-51	5.74646e-49
	KIAA2018	529.089	3261.32	5.98904	2.58232	8.22279e-51	5.97608e-49
	CDC20	5269.91	1204.58	0.229911	-2.12085	8.87481e-51	6.42116e-49
	HMP19	16.5884	652.383	31.9984	4.99993	9.69164e-51	6.981e-49
	CDKN2C	4170.89	996.579	0.241328	-2.05093	1.24748e-50	8.94601e-49
	FAM210B	745.16	3283.31	4.35348	2.12217	1.30131e-50	9.29087e-49
	ERN1	329.052	1960.89	5.81686	2.54024	1.71094e-50	1.2162e-48
	ABCA12	8.21823	667.435	55.772	5.80147	2.88892e-50	2.04458e-48
	LINC00657	5205.03	15251.6	2.91402	1.54301	2.94604e-50	2.07593e-48
	H1FX	5718.52	1613.99	0.284406	-1.81398	4.32499e-50	3.03442e-48
	AHNAK2	6010.34	17915.5	2.96048	1.56583	6.40705e-50	4.47582e-48
	KIF23	5677.67	1425.06	0.252663	-1.98471	7.21125e-50	5.016e-48
	TUBGCP3	4642.2	1186.19	0.257476	-1.95749	9.92883e-50	6.87678e-48
	CLN8	2640.71	8561.01	3.21457	1.68463	1.25558e-49	8.65921e-48
	ASPM	6619.88	1678.66	0.255223	-1.97017	1.26975e-49	8.71984e-48
	H2AFX	4539.81	1194.41	0.265806	-1.91156	1.32105e-49	9.03387e-48
	HJURP	6011.13	1519.61	0.254708	-1.97309	3.20509e-49	2.18256e-47
	AURKA	2725.94	576.348	0.214985	-2.21769	4.12328e-49	2.79606e-47
	RB1CC1	2443.16	7972.85	3.24205	1.69691	5.86579e-49	3.96112e-47
	FAM214A	487.248	2544.89	5.10198	2.35106	5.99919e-49	4.03439e-47
	FENDRR	1655.12	5744.8	3.44079	1.78274	9.0574e-49	6.06584e-47
	AP5Z1	1727.55	6963.49	3.9542	1.98339	1.01316e-48	6.75729e-47
	ZNF711	1004.94	80.3787	0.0857606	-3.54354	1.07105e-48	7.11414e-47
	SSX2IP	1004.54	67.3541	0.0724927	-3.78602	1.58958e-48	1.05153e-46
	CES2	1463.26	5474.16	3.70271	1.88858	1.66586e-48	1.0975e-46
	AEBP1	6.11042	603.484	63.2481	5.98295	2.30782e-48	1.51428e-46
	KLF7	961.874	4092.93	4.20079	2.07066	2.62235e-48	1.71372e-46
	C18orf25	1021.35	3937.55	3.81328	1.93103	5.48542e-48	3.57037e-46
	LRRC66	11.2213	691.859	44.898	5.48858	5.58019e-48	3.61752e-46
	MAP1LC3B	2883.17	9952.13	3.40728	1.76862	7.44335e-48	4.80615e-46
	RBBP6	2607.09	8143.05	3.10222	1.6333	1.42873e-47	9.18865e-46
	GOLGB1	2965.28	9047.33	3.03183	1.60019	1.9212e-47	1.23071e-45
	INO80D	539.876	3403.52	6.10902	2.61094	2.40325e-47	1.53345e-45
	EPHA8	3.58104	562.061	85.1739	6.41234	2.45988e-47	1.56342e-45
	UBE2C	4414.69	1060.82	0.242141	-2.04608	4.17713e-47	2.64448e-45
	BUB1B	4567.95	871.425	0.191355	-2.38568	5.2777e-47	3.32824e-45
	TNNT2	0	678.92	235.891	7.88198	9.45699e-47	5.94067e-45
	TYMSOS	51.8298	914.256	15.8802	3.98916	9.87813e-47	6.18127e-45
	IER5	1802.22	6113.98	3.35351	1.74567	1.08868e-46	6.78626e-45
	KAZN	801.071	3265.77	4.02468	2.00888	1.23712e-46	7.68198e-45
	ADRB2	562.914	2653.73	4.61698	2.20695	1.3765e-46	8.51483e-45
	PLK3	305.392	1873.05	5.92911	2.56781	1.48421e-46	9.14624e-45
	NCAPH	3220.4	522.593	0.164125	-2.60713	1.88314e-46	1.15606e-44
	LOC100507577	197.7	1422.46	6.93912	2.79475	2.26883e-46	1.38758e-44
	AKAP13	4420.61	12920.4	2.9041	1.53809	2.51314e-46	1.53122e-44
	ATAD2	6272.21	1915.17	0.307518	-1.70126	2.67805e-46	1.62559e-44
	ARHGAP11A	4632.52	1141.95	0.248157	-2.01067	2.9956e-46	1.81156e-44
	EFNB1	1915.16	6243.83	3.2314	1.69216	3.59335e-46	2.16496e-44
	SRSF2	15025.9	5219.9	0.34934	-1.5173	4.03891e-46	2.42439e-44
	SLC9A5	505.089	2401.95	4.67886	2.22616	4.40594e-46	2.63494e-44
	ANKRA2	478.486	2341.53	4.81034	2.26614	9.32963e-46	5.55902e-44
	CCNE2	1647.54	243.316	0.151719	-2.72053	1.01052e-45	5.99907e-44
	KRT3	64.2115	991.521	14.1833	3.82612	1.18485e-45	7.00836e-44
	ADCK3	318.844	1893.14	5.78365	2.53198	1.26341e-45	7.44582e-44
	LAPTM5	82.5248	978.634	10.9874	3.45778	1.87997e-45	1.10394e-43
	LOC100996351	11.3256	644.542	41.4431	5.37306	1.99661e-45	1.1682e-43
	CDC25B	6064.47	1736.78	0.28806	-1.79556	2.64915e-45	1.54442e-43
	RFC5	2130.95	395.707	0.189264	-2.40153	2.72498e-45	1.58293e-43
	RASGRF1	376.718	1980.67	5.13948	2.36162	3.26521e-45	1.88998e-43
	FUT3	0.89526	577.193	153.52	7.26228	3.8254e-45	2.20634e-43
	GTSE1	3635.23	901.77	0.249463	-2.0031	5.99036e-45	3.44276e-43
	MSH2	2289.01	434.494	0.193347	-2.37074	8.76605e-45	5.02019e-43
	IGF1R	2215.21	7062.24	3.16579	1.66257	1.02943e-44	5.87463e-43
	RNF19B	790.598	3250.55	4.04903	2.01758	1.46442e-44	8.32769e-43
	CENPE	3837.35	1016.38	0.267626	-1.90171	1.6173e-44	9.16491e-43
	PVT1	153.107	1284.63	8.02563	3.00461	1.74246e-44	9.83974e-43
	SUGCT	278.439	1727.82	6.00765	2.5868	1.7593e-44	9.90035e-43
	MUC20	10.2173	524.419	38.0782	5.25089	2.18932e-44	1.22776e-42
	SLFN11	2085.28	322.998	0.158331	-2.65899	2.4229e-44	1.35407e-42
	CELSR2	213.976	1466.87	6.60202	2.72291	2.60903e-44	1.45307e-42
	MAFG	4012.79	12259.6	3.04193	1.60499	4.13346e-44	2.29421e-42
	SLC2A5	0.473697	572.401	173.193	7.43624	5.02721e-44	2.78075e-42
	EZR	10407.6	3544.63	0.342727	-1.54487	5.06841e-44	2.794e-42
	SP110	379.495	2026.14	5.20688	2.38042	8.1174e-44	4.45962e-42
	NAA40	2901.8	703.063	0.245665	-2.02524	8.36219e-44	4.57858e-42
	UBR4	15620.1	39743.6	2.53367	1.34123	1.42701e-43	7.78705e-42
	ZFPM1	425.831	2104	4.8319	2.27259	1.48587e-43	8.08102e-42
	STAT3	6383.73	17936.2	2.78666	1.47854	1.54817e-43	8.39172e-42
	ADSSL1	31.7556	646.29	17.817	4.15518	1.69615e-43	9.16314e-42
	RHOBTB2	1238.78	161.599	0.136057	-2.87772	2.5462e-43	1.37097e-41
	IGFL3	0	574.86	201.386	7.65382	4.60449e-43	2.47102e-41
	KIF15	2113.14	291.76	0.141217	-2.82402	4.94816e-43	2.6467e-41
	CLP1	595.801	2825.29	4.63301	2.21195	5.05194e-43	2.69332e-41
	ZFP3	4.52843	498.978	65.1548	6.0258	5.29807e-43	2.81527e-41
	DSCC1	1122.17	125.4	0.117703	-3.08678	5.9476e-43	3.15009e-41
	SLC25A45	328.096	1788.58	5.316	2.41034	7.5209e-43	3.9704e-41
	MAFK	2143.93	6618.59	3.06139	1.61419	8.76763e-43	4.61354e-41
	ZNF407	548.438	2465.58	4.41678	2.143	9.04804e-43	4.74568e-41
	MAX	1231.72	4588.72	3.67122	1.87626	1.02914e-42	5.38042e-41
	BUB1	5161.07	1423.7	0.277368	-1.85013	1.09656e-42	5.71444e-41
	DLL4	10.2173	503.173	36.3757	5.1849	1.70687e-42	8.86637e-41
	PHLDB2	1893.63	309.26	0.168783	-2.56675	1.71233e-42	8.86637e-41
	ECT2	4729.45	1410.54	0.300891	-1.73269	1.72437e-42	8.90029e-41
	PIF1	1420.74	197.125	0.143617	-2.7997	1.75017e-42	9.00477e-41
	C15orf56	369.295	1917.2	5.0543	2.33751	2.07382e-42	1.06362e-40
	PLEKHB2	7351.73	20607.9	2.78504	1.4777	2.29483e-42	1.17326e-40
	PSME4	3376.05	9541.15	2.80966	1.49039	2.76363e-42	1.40849e-40
	CHAF1B	1615.8	255.375	0.163356	-2.6139	3.86877e-42	1.96555e-40
	MROH6	59.1482	818.289	12.6283	3.65859	4.3524e-42	2.20436e-40
	MYO1A	0	548.146	192.59	7.58939	4.66963e-42	2.35765e-40
	NCAPG	2951.54	606.522	0.207435	-2.26927	4.6914e-42	2.36129e-40
	NDC80	2941.36	734.11	0.252668	-1.98469	5.3547e-42	2.6868e-40
	LOC100272217	116.536	1144.61	9.26754	3.21219	5.5934e-42	2.79791e-40
	PARP2	1634.89	184.439	0.11694	-3.09616	1.04941e-41	5.23315e-40
	OSER1	1473.45	4904.28	3.28918	1.71773	1.39187e-41	6.91965e-40
	SOWAHB	4.37203	483.825	63.1592	5.98092	1.89414e-41	9.38785e-40
	COL15A1	590.946	2880.75	4.72454	2.24017	3.24961e-41	1.60568e-39
	ZKSCAN1	2770.46	7992.92	2.86781	1.51995	5.56226e-41	2.74005e-39
	GAL3ST1	3.89833	527.015	70.9007	6.14773	6.33884e-41	3.11314e-39
	GPR75	81.3032	931.268	10.7061	3.42036	6.5287e-41	3.1967e-39
	ABCC2	126.918	1101.08	8.20254	3.03607	6.85851e-41	3.34807e-39
	UHRF1	2678.12	624.119	0.23615	-2.08223	7.19095e-41	3.49981e-39
	VWA3A	11.6905	505.302	32.7295	5.03252	1.01269e-40	4.91395e-39
	AOC2	64.0371	814.503	11.6526	3.54258	1.15822e-40	5.60337e-39
	DEPDC1	2026.55	360.677	0.181401	-2.46274	1.69715e-40	8.18622e-39
	ICMT	6992.53	2267.07	0.325798	-1.61795	2.3713e-40	1.14041e-38
	TRIO	8631.65	22888.6	2.62908	1.39456	2.71193e-40	1.30036e-38
	ANLN	17823.2	6506.56	0.365417	-1.45239	2.77324e-40	1.32344e-38
	KIF5A	696.169	3005.27	4.21758	2.07642	2.77639e-40	1.32344e-38
	ASF1B	3329.3	917.439	0.27879	-1.84275	2.78517e-40	1.32373e-38
	APC2	27.2794	578.563	18.2545	4.19018	3.02472e-40	1.43338e-38
	KLHL42	2170.53	463.662	0.217386	-2.20167	3.11584e-40	1.47226e-38
	C6orf62	3487.52	10004.8	2.84816	1.51003	4.48921e-40	2.10889e-38
	MIS18BP1	2102.16	411.705	0.199882	-2.32278	4.47696e-40	2.10889e-38
	CELA2A	0	495.2	174.491	7.44701	6.80845e-40	3.18915e-38
	NFAT5	2469.81	8057.07	3.21889	1.68656	7.17512e-40	3.35122e-38
	USP13	1936.74	401.124	0.21108	-2.24414	8.31894e-40	3.87429e-38
	TSGA10	13.481	504.784	29.0643	4.86117	9.51e-40	4.41629e-38
	XRCC6BP1	5038.03	1400.9	0.279305	-1.84009	1.12574e-39	5.21281e-38
	FBXO5	2005.07	405.409	0.206329	-2.27698	1.34462e-39	6.20862e-38
	PRC1	10647.3	3670.82	0.345822	-1.5319	1.45947e-39	6.71978e-38
	HYDIN	6.53198	481.465	47.3538	5.56541	1.68128e-39	7.71912e-38
	SLC39A10	442.784	2059.94	4.56491	2.19059	3.07237e-39	1.40661e-37
	ARHGAP30	13.2159	589.644	33.333	5.05888	4.12703e-39	1.88413e-37
	MUS81	3983.37	1198.13	0.303689	-1.71933	4.16972e-39	1.89828e-37
	CMKLR1	0.473697	462.699	139.848	7.12772	4.294e-39	1.94938e-37
	ARHGAP4	23.1725	539.862	19.634	4.29528	4.69926e-39	2.1274e-37
	HSPA5	19846.6	48761.4	2.46093	1.2992	5.00553e-39	2.25974e-37
	TNFSF4	11.0083	467.947	31.6585	4.98452	7.54573e-39	3.39705e-37
	CDK2	3585.37	1044.46	0.294404	-1.76413	7.65636e-39	3.4373e-37
	AGAP2-AS1	7818.7	2805.28	0.360961	-1.47009	9.52716e-39	4.26538e-37
	SLC6A13	1.73839	463.418	94.9459	6.56903	1.25238e-38	5.59157e-37
	CLSPN	2005.25	407.3	0.207051	-2.27194	1.27945e-38	5.69671e-37
	LOC101060553	22.5379	540.077	20.1825	4.33503	1.28437e-38	5.70296e-37
	SLC7A11	3496.07	9611.43	2.73821	1.45323	2.19477e-38	9.71873e-37
	POGK	2636.93	675.096	0.259791	-1.94458	2.70155e-38	1.19302e-36
	MXD1	330.02	1718.33	5.10025	2.35057	2.79013e-38	1.2288e-36
	PCID2	3188.81	8666.82	2.70088	1.43343	2.97141e-38	1.30509e-36
	KIAA1161	126.918	996.549	7.47627	2.90232	3.13029e-38	1.37115e-36
	SPTBN5	190.842	1220.27	6.16817	2.62484	3.26566e-38	1.42659e-36
	FAM111A	4526.05	1258.5	0.279255	-1.84035	3.38014e-38	1.47263e-36
	PDE2A	3.5289	418.482	62.749	5.97152	4.27189e-38	1.85615e-36
	CPSF4	1183.79	3998.52	3.33681	1.73847	5.92849e-38	2.56907e-36
	ANKRD10	9739.38	23740.2	2.4283	1.27995	7.06711e-38	3.05431e-36
	FZD2	1688.6	327.543	0.198598	-2.33208	7.55311e-38	3.25567e-36
	FAM64A	3272.8	938.417	0.28997	-1.78603	8.18227e-38	3.51751e-36
	GPC1	5214.23	13603.1	2.58978	1.37283	9.26421e-38	3.97209e-36
	PNCK	0.473697	433.29	130.857	7.03185	1.22959e-37	5.25805e-36
	BRCA1	2913.1	730.874	0.253665	-1.97901	1.31763e-37	5.6197e-36
	MCM7	12572.8	4910.2	0.392454	-1.3494	1.36053e-37	5.78745e-36
	SLC9A3R1	3540.33	11494.9	3.17052	1.66472	1.56467e-37	6.63837e-36
	PLCD3	1248.34	4214.3	3.34858	1.74355	1.5913e-37	6.73375e-36
	LRRC8A	7341.22	18657.7	2.52503	1.3363	1.60537e-37	6.77557e-36
	TAC3	5.94952	463.034	48.9554	5.6134	1.79454e-37	7.55431e-36
	CELF6	65.5238	768.54	10.8044	3.43354	1.95963e-37	8.22789e-36
	SARM1	576.583	2333.05	3.97472	1.99085	2.39597e-37	1.0034e-35
	ZNF23	1152.33	3774.64	3.24474	1.6981	2.63145e-37	1.09917e-35
	PSMD3	7835.66	19858.2	2.51443	1.33023	3.11095e-37	1.29612e-35
	KRT78	20.7042	7179.06	122.025	6.93104	3.26075e-37	1.35505e-35
	MUC2	2.26422	424.154	79.174	6.30695	4.16896e-37	1.72804e-35
	CHMP1B	1280.74	4502.57	3.45475	1.78858	5.39888e-37	2.23213e-35
	SPC25	1674.89	328.221	0.2	-2.32193	5.46495e-37	2.2537e-35
	ZNF441	362.671	1784.57	4.8262	2.27089	6.94318e-37	2.85604e-35
	PRKXP1	33.3331	597.236	15.6584	3.96887	7.31937e-37	3.00316e-35
	CBX2	2491.82	614.422	0.250223	-1.99871	7.45171e-37	3.04974e-35
	KPNB1	24490.5	10024	0.410897	-1.28315	8.16252e-37	3.33224e-35
	TMEM68	710.85	2646.15	3.6737	1.87723	9.31935e-37	3.79494e-35
	PLEKHG2	2439.99	585.777	0.24353	-2.03783	9.82994e-37	3.99283e-35
	WDR76	2086.73	494.514	0.241198	-2.05171	1.03386e-36	4.18895e-35
	LINC00565	31.4905	622.303	16.9123	4.08001	1.0834e-36	4.3787e-35
	MYO15A	2.73791	430.533	72.4438	6.17879	1.20017e-36	4.83859e-35
	RBBP8	2038.32	430.136	0.214899	-2.21827	1.2699e-36	5.107e-35
	SHCBP1	4211.37	1271.41	0.304348	-1.7162	1.33562e-36	5.35803e-35
	JHDM1D-AS1	92.5901	843.909	8.55636	3.097	1.51563e-36	6.06513e-35
	MGEA5	4070.85	10541.2	2.57844	1.3665	1.59279e-36	6.3582e-35
	NEAT1	11625.8	27546.3	2.36004	1.23881	1.93482e-36	7.70458e-35
	NUF2	2746.1	645.658	0.237278	-2.07535	1.94477e-36	7.72523e-35
	SEC22C	2512.19	637.516	0.257327	-1.95832	2.26157e-36	8.96168e-35
	PARD6G	536.722	2261.18	4.14086	2.04993	2.96499e-36	1.17204e-34
	MCM2	4860.18	1632.27	0.338527	-1.56266	3.09069e-36	1.21876e-34
	LYST	863.608	3575.99	4.05113	2.01832	3.7126e-36	1.46044e-34
	MCM5	6296.26	1945.82	0.311337	-1.68345	4.79453e-36	1.88147e-34
	BLOC1S2	851.727	2960.81	3.43554	1.78054	5.18693e-36	2.03054e-34
	CDC6	3171.91	847.452	0.26967	-1.89073	5.45787e-36	2.13146e-34
	RFC3	1957.34	451.224	0.235014	-2.08918	5.56566e-36	2.16833e-34
	COL20A1	0.89526	394.334	104.206	6.70329	5.67523e-36	2.20572e-34
	NASP	5609.01	1931.32	0.346642	-1.52848	6.65078e-36	2.57869e-34
	AKAP1	2660.91	727.417	0.276929	-1.85241	6.80237e-36	2.63117e-34
	SLC2A12	89.1044	813.642	8.56561	3.09856	6.87783e-36	2.65402e-34
	ZNFX1	2152.95	6080.33	2.80285	1.48689	7.60616e-36	2.9281e-34
	ZMYM3	1678.78	285.522	0.175022	-2.51439	1.15599e-35	4.43959e-34
	EVPL	5.26729	398.354	45.9191	5.52102	1.30343e-35	4.99402e-34
	CDC42EP1	1415.42	243.818	0.177307	-2.49568	1.38879e-35	5.30852e-34
	CALML3-AS1	4.89786	384.16	47.0973	5.55757	1.75603e-35	6.69646e-34
	APPL1	1838.08	391.626	0.217391	-2.20163	1.99618e-35	7.59437e-34
	H2AFY2	1561.48	190.194	0.126146	-2.98683	2.21679e-35	8.41395e-34
	ZBED5	1704.95	345.756	0.207532	-2.26859	2.42341e-35	9.17667e-34
	ENKUR	8.27036	416.066	34.5741	5.11162	2.44983e-35	9.23358e-34
	IP6K3	402.42	1819.31	4.40895	2.14044	2.44532e-35	9.23358e-34
	ARRDC4	277.322	1427.26	5.00714	2.32399	2.68519e-35	1.00972e-33
	ANKRD11	6353.84	16338.8	2.55504	1.35335	3.76433e-35	1.41224e-33
	CALR	36269.6	81978.7	2.24992	1.16987	3.81452e-35	1.42776e-33
	XYLT2	2697.29	635.545	0.238144	-2.07009	3.93205e-35	1.46836e-33
	AMIGO2	1663.17	355.847	0.21873	-2.19278	4.2382e-35	1.57905e-33
	SLC6A19	0	391.819	138.002	7.10854	4.61473e-35	1.71539e-33
	NEK8	157.205	1045.7	6.37594	2.67264	4.91641e-35	1.82335e-33
	TACC3	3830.36	1110.95	0.292175	-1.7751	5.01787e-35	1.85673e-33
	CEP350	2226.37	6138.1	2.73976	1.45405	5.17482e-35	1.91044e-33
	FOXF1	4080.38	11018.3	2.67631	1.42024	5.8361e-35	2.14967e-33
	PLB1	52.2468	646.953	11.2235	3.48845	7.48344e-35	2.75021e-33
	TRNAU1AP	725.167	2680.73	3.65088	1.86825	8.15471e-35	2.99012e-33
	HSPB8	622.989	2602.32	4.09336	2.03329	9.74661e-35	3.56576e-33
	APOL4	8.74406	409.045	32.6688	5.02984	1.56382e-34	5.70831e-33
	RACGAP1	7126.72	2661.5	0.375417	-1.41343	2.01247e-34	7.32946e-33
	ZFR2	0.473697	373.932	111.901	6.80608	2.24004e-34	8.13998e-33
	INTS2	1278.06	3975.99	3.07733	1.62168	2.44899e-34	8.87938e-33
	ISCU	1230.66	3850.97	3.09669	1.63073	2.5451e-34	9.20722e-33
	DLG3	1187.06	154.126	0.135603	-2.88254	2.74344e-34	9.90266e-33
	PPP1R15B	1857.8	5326.93	2.84613	1.509	2.79566e-34	1.00687e-32
	PURB	2967.02	7747.82	2.59664	1.37665	3.25695e-34	1.17041e-32
	EZH2	3668.22	1130.36	0.31053	-1.68719	3.39596e-34	1.21766e-32
	FLRT1	21.4862	475.53	18.3886	4.20074	4.56709e-34	1.63397e-32
	CBX4	2327.29	6604.43	2.80486	1.48793	4.64673e-34	1.6588e-32
	FADS3	2276.98	6297.07	2.73941	1.45387	5.24871e-34	1.86958e-32
	DDN	54.4589	640.348	10.657	3.41373	5.7445e-34	2.04169e-32
	NUAK2	275.919	1405.16	4.95661	2.30935	6.2745e-34	2.22518e-32
	ABHD4	900.381	3454.31	3.76468	1.91253	6.46409e-34	2.28741e-32
	SH2B2	1256.84	3843.31	3.03354	1.601	6.91637e-34	2.44213e-32
	NADSYN1	738.437	2598.99	3.47234	1.79591	7.12788e-34	2.51134e-32
	TROAP	3941.33	1302.02	0.333242	-1.58536	7.58724e-34	2.66738e-32
	PKMYT1	1773.54	411.319	0.236717	-2.07877	9.63449e-34	3.37979e-32
	TMUB1	1056.27	159.602	0.15773	-2.66447	1.09385e-33	3.82894e-32
	PPFIA4	109.439	857.851	7.40005	2.88754	1.11782e-33	3.90443e-32
	PAGR1	1427.33	269.752	0.194017	-2.36574	1.12123e-33	3.90789e-32
	SH2D4A	904.014	116.578	0.135945	-2.87891	1.1717e-33	4.07505e-32
	CDK1	6674.37	2486.27	0.37394	-1.41912	1.22173e-33	4.23994e-32
	MYH15	28.6483	592.634	17.0841	4.09458	1.31672e-33	4.55985e-32
	ANKRD52	6259.15	2323.93	0.373853	-1.41946	1.32407e-33	4.57551e-32
	FIGNL1	1713.52	374.747	0.223486	-2.16174	1.45694e-33	5.02397e-32
	CELA2B	0	362.538	127.62	6.99571	1.50838e-33	5.19031e-32
	PATL2	50.2909	629.305	11.312	3.49979	1.65863e-33	5.6952e-32
	NEK2	1594.57	273.305	0.175149	-2.51335	2.14098e-33	7.33592e-32
	DNAH10	47.8748	599.585	11.2679	3.49415	2.5753e-33	8.80546e-32
	STPG1	605.239	2242.11	3.65109	1.86833	2.83796e-33	9.68313e-32
	LOC730668	18.5874	537.953	22.6942	4.50425	2.93793e-33	1.00032e-31
	LRRTM2	108.005	884.946	7.74641	2.95353	3.83976e-33	1.30463e-31
	ZWINT	6343.99	2387.47	0.378695	-1.40089	3.88806e-33	1.31828e-31
	FANCG	1250.43	227.039	0.187627	-2.41406	3.9079e-33	1.32224e-31
	SHROOM1	1321.4	248.803	0.194099	-2.36514	4.38739e-33	1.48138e-31
	USP1	4913.27	1727.47	0.35403	-1.49806	4.44998e-33	1.4994e-31
	DYRK3	505.314	2118.08	4.09031	2.03221	4.77555e-33	1.60575e-31
	PKD2L1	0	352.78	123.913	6.95318	5.44889e-33	1.82837e-31
	NDC1	2919.12	882.02	0.305603	-1.71027	5.88813e-33	1.97167e-31
	ATP2A1	74.8414	711.588	8.81493	3.13995	6.74225e-33	2.25302e-31
	EXOSC8	1837.3	433.445	0.240414	-2.05641	6.86309e-33	2.28868e-31
	HES2	12.9507	516.084	29.5347	4.88434	6.92083e-33	2.29848e-31
	MIDN	2076.64	5743.15	2.74172	1.45508	6.9195e-33	2.29848e-31
	KCTD3	2502.81	573.814	0.231483	-2.11102	7.14672e-33	2.36865e-31
	NCAPD3	2728.8	750.712	0.278023	-1.84672	7.26188e-33	2.4019e-31
	SNHG3	2645.53	7021.2	2.63443	1.39749	8.30338e-33	2.74079e-31
	SEC61A1	13715.5	31578.7	2.28809	1.19415	8.83102e-33	2.90903e-31
	NUSAP1	8415.12	2652.73	0.312526	-1.67795	9.03505e-33	2.9702e-31
	CYP27B1	1694.4	4762.57	2.78817	1.47932	1.04708e-32	3.43521e-31
	VPS13C	2922.67	7727.55	2.618	1.38846	1.09045e-32	3.57027e-31
	CDHR1	40.391	569.079	12.5021	3.6441	1.10585e-32	3.61342e-31
	BARD1	1440.62	276.914	0.197426	-2.34061	1.12488e-32	3.6682e-31
	APOBEC3C	549.721	2142.55	3.82956	1.93718	1.52147e-32	4.9515e-31
	RBM15	555.53	2286.06	4.03583	2.01286	2.12052e-32	6.88723e-31
	MCMBP	5262.45	1912.61	0.365894	-1.4505	2.26316e-32	7.33582e-31
	TPP1	2300.52	6571.32	2.84599	1.50893	2.2837e-32	7.38759e-31
	BIRC5	8713.53	3461.14	0.398638	-1.32685	2.33136e-32	7.52677e-31
	ANP32E	5548.88	1938.07	0.350846	-1.51109	2.70732e-32	8.72318e-31
	MAST4	611.929	2231	3.58791	1.84314	2.73976e-32	8.81017e-31
	LRP2BP	37.236	538.32	12.7279	3.66992	2.75388e-32	8.83805e-31
	UBE2T	3155.39	832.07	0.265043	-1.9157	2.93566e-32	9.40282e-31
	TFDP1	15124.5	6008.79	0.398198	-1.32844	3.33376e-32	1.06569e-30
	CCND2	717.155	2481.66	3.41844	1.77334	3.54292e-32	1.13032e-30
	IL16	4.37203	349.047	44.966	5.49076	3.67438e-32	1.16996e-30
	ZSWIM4	630.638	2450.43	3.82724	1.9363	3.88189e-32	1.2336e-30
	CSNK1G1	746.569	2556.67	3.37994	1.757	4.09213e-32	1.29787e-30
	ANP32B	4793.71	1686.76	0.354726	-1.49522	4.81967e-32	1.52563e-30
	TWIST1	1030.68	165.643	0.167655	-2.57643	5.06735e-32	1.60091e-30
	DFNB31	368.282	1652.26	4.37225	2.12838	5.11407e-32	1.61252e-30
	NIPA1	1494.35	320.828	0.219958	-2.1847	5.17167e-32	1.62752e-30
	TRA2B	8457.14	3214.66	0.380573	-1.39376	5.2103e-32	1.6365e-30
	MYCN	394.587	1687.03	4.19854	2.06989	5.47003e-32	1.71475e-30
	CTSD	18728.5	43748.8	2.32919	1.21983	6.42298e-32	2.0096e-30
	CASP10	97.5788	890.634	8.47451	3.08313	8.20906e-32	2.56347e-30
	CEACAM1	70.6779	684.184	8.93309	3.15916	1.01293e-31	3.15704e-30
	F2R	5329.29	12819.2	2.39841	1.26208	1.09716e-31	3.41298e-30
	PEPD	5765.79	13589.4	2.34241	1.22799	1.26877e-31	3.93926e-30
	NAV2	3301.72	8485.18	2.5441	1.34716	1.45106e-31	4.48804e-30
	NEURL1B	3311.63	1047.99	0.318017	-1.65283	1.44844e-31	4.48804e-30
	LBR	2832.19	848.634	0.302764	-1.72374	1.61605e-31	4.98882e-30
	TSPAN11	67.8312	663.217	9.0118	3.17182	1.70438e-31	5.25149e-30
	TCTE1	0.421563	338.109	98.2576	6.6185	1.81269e-31	5.57463e-30
	C19orf48	2130.83	533.526	0.254539	-1.97404	2.03124e-31	6.2349e-30
	TTK	1752.26	423.454	0.246285	-2.0216	2.11399e-31	6.47665e-30
	HIVEP1	985.239	3124.28	3.134	1.64801	2.41512e-31	7.38524e-30
	ITGB4	77.7357	698.633	8.35034	3.06183	2.54475e-31	7.767e-30
	YEATS2	2458.25	716.508	0.295308	-1.75971	2.60894e-31	7.94794e-30
	TNFRSF10A	12.0599	392.446	24.3083	4.60338	2.64382e-31	8.03909e-30
	MKI67	21135.2	7619.74	0.358086	-1.48162	2.70817e-31	8.21936e-30
	FAM109A	432.816	1894.26	4.27622	2.09634	4.36128e-31	1.32118e-29
	ELN	25.1194	479.204	15.9745	3.9977	4.88385e-31	1.47673e-29
	MAMDC4	276.47	1365.99	4.81515	2.26758	5.24084e-31	1.58172e-29
	PBK	4536.94	1473.32	0.324706	-1.62279	5.96208e-31	1.79605e-29
	RARA	2906.44	7257.61	2.48288	1.31202	6.41587e-31	1.92917e-29
	FOSL1	9135.93	20487.7	2.23275	1.15882	7.87908e-31	2.36475e-29
	TBC1D4	1066.95	176.262	0.172138	-2.53836	8.68932e-31	2.6031e-29
	CRISPLD1	1017	169.497	0.173563	-2.52646	9.77302e-31	2.92235e-29
	LATS2	1816.45	5019.63	2.73932	1.45382	1.0054e-30	3.00085e-29
	IFFO2	1742.7	4894.44	2.77231	1.47109	1.12096e-30	3.3396e-29
	LAT2	50.8123	718.091	12.4872	3.64237	1.20066e-30	3.57046e-29
	RTKN2	694.184	75.2863	0.117241	-3.09245	1.27228e-30	3.77653e-29
	RFC4	1841.62	375.702	0.206815	-2.27359	1.30308e-30	3.86088e-29
	DANCR	2415.26	6519.22	2.67479	1.41942	1.74228e-30	5.15275e-29
	NR1D1	737.263	2802.48	3.73143	1.89973	2.04118e-30	6.02576e-29
	TOPBP1	3613.71	1225.14	0.342693	-1.54501	2.05683e-30	6.06091e-29
	TOP2A	26008.3	9559.53	0.363784	-1.45885	2.32656e-30	6.8433e-29
	KIF18B	3957.52	1022.08	0.2586	-1.95121	2.52668e-30	7.41846e-29
	UNC5B	312.998	1417.24	4.42093	2.14435	2.55947e-30	7.50114e-29
	CKAP2	5219.28	1942.5	0.373836	-1.41952	2.67123e-30	7.81457e-29
	FBXO22	1445.76	4047.48	2.77816	1.47413	2.73122e-30	7.97565e-29
	TIGD3	22.3294	432.169	16.1068	4.0096	2.79695e-30	8.15291e-29
	RAD51AP1	1815.42	429.86	0.240538	-2.05566	3.4506e-30	1.00402e-28
	FAM219A	1021.01	3578.59	3.45613	1.78916	3.64853e-30	1.05971e-28
	USP49	695.279	2346.18	3.32946	1.73529	3.72341e-30	1.07952e-28
	DDIT3	27029.1	57876.5	2.13499	1.09423	3.90397e-30	1.12985e-28
	ZNF432	182.486	1044.21	5.49053	2.45694	4.09711e-30	1.18363e-28
	MED22	1586.98	367.282	0.237003	-2.07702	4.80895e-30	1.38681e-28
	ITPKC	396.613	1633.38	4.02852	2.01025	5.29548e-30	1.5244e-28
	COL27A1	1101.11	3329.4	2.98767	1.57902	5.42943e-30	1.56019e-28
	ETV3	365.601	1562.54	4.17576	2.06204	5.84826e-30	1.67757e-28
	MEG3	8360.36	18884.5	2.24754	1.16835	6.81112e-30	1.95031e-28
	CACNG4	1781.41	452.128	0.258504	-1.95174	7.07633e-30	2.02268e-28
	ORAOV1	1866.01	4945.67	2.6323	1.39632	7.85107e-30	2.24018e-28
	GOLGA6C	2.68578	309.069	52.5038	5.71435	7.88568e-30	2.2461e-28
	XKR7	3.05521	309.995	49.0019	5.61477	8.17125e-30	2.32336e-28
	LRRC37A3	82.638	703.352	7.93394	2.98804	8.82071e-30	2.50363e-28
	TPRG1L	2082.18	5848.49	2.77205	1.47095	9.07439e-30	2.57113e-28
	TNNI1	0.89526	295.356	77.048	6.26769	9.25274e-30	2.61709e-28
	CDCA8	3884.76	1331.02	0.345171	-1.53462	9.47019e-30	2.67393e-28
	IFFO1	1299.93	265.708	0.209164	-2.25729	9.68985e-30	2.73119e-28
	VPS13D	2253.09	6007.56	2.64007	1.40058	9.89778e-30	2.78495e-28
	SELPLG	364.497	1540.25	4.13311	2.04723	1.01148e-29	2.84107e-28
	LOC284080	50.3476	563.807	10.0988	3.33611	1.0386e-29	2.9122e-28
	LRPPRC	5344.04	12356.4	2.30195	1.20285	1.04954e-29	2.9378e-28
	EXOSC10	4163.11	1514.67	0.366634	-1.44759	1.18177e-29	3.30224e-28
	MYBL1	2902.86	887.646	0.308508	-1.69662	1.24153e-29	3.46324e-28
	C9orf117	1.79052	298.246	61.4086	5.94037	1.34943e-29	3.75776e-28
	ZNF195	1012.81	3043.84	2.97572	1.57324	1.39082e-29	3.86638e-28
	CDCA3	3335.16	907.874	0.274339	-1.86597	1.39378e-29	3.86797e-28
	PABPC4	4663.85	11030.5	2.35024	1.23281	1.42976e-29	3.96105e-28
	PRMT6	1072.74	141.522	0.138161	-2.85558	1.46523e-29	4.05238e-28
	WHSC1	5212.55	1728.44	0.332109	-1.59027	1.56622e-29	4.3243e-28
	SKI	1950.96	5329.43	2.70632	1.43633	1.65056e-29	4.54943e-28
	HERC1	2911.96	7339.28	2.50137	1.32272	1.74151e-29	4.79195e-28
	KCND1	51.2473	585.857	10.2858	3.36258	1.84558e-29	5.06971e-28
	CHD5	320.122	1447.23	4.35954	2.12418	1.86117e-29	5.10388e-28
	ASB13	718.109	87.0237	0.129933	-2.94416	1.95702e-29	5.35768e-28
	LCAT	554.805	2053.9	3.6382	1.86322	2.21611e-29	6.05675e-28
	DLGAP1-AS2	143.35	900.861	5.99964	2.58488	2.22343e-29	6.06651e-28
	OSM	0.843126	319.951	78.9389	6.30267	2.31218e-29	6.29805e-28
	FLJ31104	12.4815	360.843	21.8867	4.45198	2.67303e-29	7.26876e-28
	MTMR4	2032.65	572.591	0.286059	-1.80561	2.68667e-29	7.29362e-28
	APAF1	845.547	2678.63	3.13504	1.64849	2.70915e-29	7.34234e-28
	TMEM131	2331.01	5960.13	2.54311	1.34659	2.76913e-29	7.49236e-28
	A3GALT2	0.89526	288.252	75.0845	6.23044	2.87379e-29	7.76259e-28
	PAK6	42.7594	533.456	11.1291	3.47626	2.98662e-29	8.05394e-28
	AOC3	22.9118	432.048	15.6456	3.96768	3.03716e-29	8.17663e-28
	CCRN4L	535.54	1964.66	3.6047	1.84988	3.05951e-29	8.22313e-28
	TOP1	3676.52	9322.32	2.51358	1.32974	3.45266e-29	9.26446e-28
	IRAK2	558.961	2083.45	3.62616	1.85844	3.64226e-29	9.75703e-28
	KANK3	16.067	460.54	21.742	4.44241	3.7419e-29	1.00074e-27
	FNDC7	1.26469	331.485	71.1838	6.15348	3.76907e-29	1.00635e-27
	SEMA4A	40.4476	516.559	11.2565	3.49269	3.78148e-29	1.008e-27
	NSMCE4A	1104.19	209.812	0.196701	-2.34593	3.84676e-29	1.02372e-27
	ZNF460	83.0938	799.166	8.86039	3.14737	4.03478e-29	1.07199e-27
	TLCD2	161.947	955.595	5.65736	2.50013	4.06117e-29	1.07724e-27
	PKN3	1301.42	282.631	0.223057	-2.16451	4.31198e-29	1.1419e-27
	PPP1R26	2330.87	659.162	0.286103	-1.80539	4.50253e-29	1.19042e-27
	HUNK	679.937	78.0671	0.123868	-3.01312	4.84195e-29	1.27807e-27
	CBX1	5567.65	2191.68	0.396178	-1.33578	5.35623e-29	1.41152e-27
	TPX2	10091.3	4099.52	0.40759	-1.29481	5.42972e-29	1.42856e-27
	ZNF587	439.665	1692.9	3.78211	1.91919	5.44883e-29	1.43127e-27
	LYNX1	1366.85	3787.98	2.74884	1.45883	5.92803e-29	1.55462e-27
	PRIM1	881.758	122.778	0.14681	-2.76798	6.40304e-29	1.67648e-27
	CNTRL	1398.93	269.199	0.196949	-2.3441	6.89104e-29	1.80134e-27
	MUC19	0.473697	282.487	84.0841	6.39376	7.16643e-29	1.87031e-27
	ENTPD4	4360.53	1623.15	0.374828	-1.4157	7.24355e-29	1.8874e-27
	SIPA1	2683.59	814.682	0.306805	-1.70461	8.37983e-29	2.17997e-27
	SLC29A1	1811.16	436.467	0.246117	-2.02259	9.06922e-29	2.35553e-27
	TIA1	3094.64	1034.16	0.337456	-1.56723	9.12176e-29	2.36538e-27
	KLHDC3	2304.32	697.525	0.306652	-1.70533	9.29707e-29	2.40699e-27
	PLEC	26612.9	57007.3	2.13153	1.09189	9.59373e-29	2.47983e-27
	POLD3	1144.56	226.822	0.204719	-2.28829	1.02991e-28	2.65793e-27
	TMEM246	759.477	95.511	0.134088	-2.89874	1.0603e-28	2.73201e-27
	LMNB2	15102.9	6548.77	0.434759	-1.20171	1.10858e-28	2.85185e-27
	PRG2	17.5358	414.693	18.6407	4.22038	1.34647e-28	3.45837e-27
	ZBED4	1194.04	3392.15	2.81667	1.49399	1.44487e-28	3.70522e-27
	CIT	5410.23	1730.88	0.318398	-1.6511	1.60367e-28	4.10596e-27
	CD97	1891.06	502.811	0.269701	-1.89056	1.63138e-28	4.17031e-27
	ZDHHC11	50.0258	601.644	10.7267	3.42314	1.78367e-28	4.55242e-27
	TRIM47	1038.96	149.251	0.149924	-2.7377	1.79909e-28	4.58457e-27
	VEGFA	4062.69	9509.78	2.32568	1.21765	1.80834e-28	4.60089e-27
	TNFRSF12A	9022.1	3564.08	0.394756	-1.34097	1.85259e-28	4.7061e-27
	KIAA1656	183.46	1003.66	5.24155	2.38999	2.10524e-28	5.33954e-27
	DLX1	552.372	48.1886	0.097555	-3.35764	2.17285e-28	5.50241e-27
	ZNF778	277.687	1264.53	4.43785	2.14986	2.18283e-28	5.51906e-27
	HMGA2	5626.77	2044.71	0.364292	-1.45683	2.24481e-28	5.66693e-27
	KLHL24	254.85	1234.35	4.69352	2.23067	2.89564e-28	7.29854e-27
	KIAA1524	3362.93	1118.7	0.335667	-1.5749	3.03762e-28	7.64452e-27
	ST3GAL1	3291.99	7770.82	2.34919	1.23216	3.06738e-28	7.70745e-27
	DEPDC1B	1153.84	210.909	0.189384	-2.40062	3.12031e-28	7.82831e-27
	FYB	16.4841	373.205	17.9796	4.16829	3.12725e-28	7.83359e-27
	FAM102B	1790.15	439.479	0.249014	-2.0057	3.20514e-28	8.01632e-27
	C1orf21	992.578	146.698	0.155326	-2.68663	3.41212e-28	8.52084e-27
	EP400	6327.86	14592.6	2.29088	1.1959	3.78936e-28	9.44834e-27
	ACER2	37.3924	489.539	11.4731	3.52018	3.8269e-28	9.52729e-27
	ELL	662.936	2248.31	3.33604	1.73814	3.95194e-28	9.82348e-27
	PCNXL2	1016.9	3026.91	2.94222	1.55691	4.0396e-28	1.0026e-26
	SEPT8	5934.17	2398.67	0.406748	-1.29779	4.05551e-28	1.00501e-26
	MED26	432.911	1704.85	3.8561	1.94714	4.27498e-28	1.05778e-26
	NPC1	4779.54	10920.6	2.27601	1.18651	4.55448e-28	1.12522e-26
	CHAF1A	3035.87	1026.45	0.341385	-1.55053	4.9774e-28	1.22783e-26
	ZNF423	136.657	933.502	6.44044	2.68716	5.11158e-28	1.25902e-26
	DNAJC9	1660.8	387.016	0.237555	-2.07367	5.61248e-28	1.3803e-26
	PLEKHM1	988.881	2909.14	2.91255	1.54228	6.37993e-28	1.56666e-26
	CARHSP1	3965.57	1452.79	0.369019	-1.43823	6.55634e-28	1.60754e-26
	CMBL	236.296	1133.83	4.65474	2.2187	7.57799e-28	1.85523e-26
	ITIH5	105.593	752.217	6.6993	2.74401	7.65515e-28	1.8713e-26
	ZNF121	163.094	931.772	5.48806	2.45629	7.99626e-28	1.95174e-26
	EPS8L2	6.84478	314.929	30.1729	4.91518	8.38007e-28	2.04234e-26
	DUOX2	3.15948	294.058	45.1154	5.49555	8.89141e-28	2.16371e-26
	IGFN1	16658.2	35441.4	2.10659	1.07491	9.48006e-28	2.30005e-26
	PCGF2	2535.19	798.04	0.318669	-1.64987	9.46968e-28	2.30005e-26
	SRGAP3	82.2641	660.304	7.46915	2.90094	9.851e-28	2.38648e-26
	SGK223	528.874	1996.5	3.70111	1.88796	1.03024e-27	2.4921e-26
	DLGAP1	145.197	878.666	5.76603	2.52758	1.04139e-27	2.51532e-26
	TRANK1	756.982	2656.68	3.43645	1.78092	1.0575e-27	2.55043e-26
	NPAS4	34.072	480.046	12.1967	3.60842	1.09478e-27	2.63643e-26
	LOC101926975	11.5862	345.365	21.9259	4.45456	1.18867e-27	2.85828e-26
	PSMC3IP	1279.99	287.279	0.23018	-2.11917	1.26757e-27	3.04347e-26
	EGR1	328.313	1419.37	4.20728	2.07289	1.27974e-27	3.06815e-26
	LSG1	2422.64	6056.02	2.47626	1.30816	1.38471e-27	3.31493e-26
	KIF5B	13781	6138.83	0.446923	-1.1619	1.45465e-27	3.47722e-26
	RAD51	1108.1	225.148	0.209864	-2.25248	1.50181e-27	3.58466e-26
	RFPL3S	12.7943	390.253	22.6595	4.50205	1.6015e-27	3.81698e-26
	TNFSF14	8.69193	325.178	25.6115	4.67872	1.68325e-27	4.00594e-26
	JADE1	1849.56	511.971	0.280932	-1.83171	1.69066e-27	4.01768e-26
	FUCA1	682.936	2209.77	3.1947	1.67568	2.41998e-27	5.74241e-26
	RPS6KA2	1967.86	4956.48	2.50346	1.32392	2.87186e-27	6.80472e-26
	PKP1	0.421563	270.017	78.0383	6.28611	3.00953e-27	7.1205e-26
	DCK	2367.42	747.266	0.319477	-1.64622	3.03017e-27	7.1589e-26
	POLA2	3535.32	1230.69	0.350934	-1.51073	3.10647e-27	7.32848e-26
	RC3H1	426.71	1652.43	3.80289	1.9271	3.31238e-27	7.80287e-26
	ZBTB43	754.987	2364.27	3.09402	1.62948	3.31818e-27	7.8052e-26
	PNPLA7	41.3473	506.517	10.8292	3.43686	3.35511e-27	7.88061e-26
	LOC100129917	76.1537	629.364	7.66241	2.9378	3.41645e-27	8.01309e-26
	ZIC2	1305.58	303.119	0.238122	-2.07023	3.50831e-27	8.21665e-26
	ARL4C	1787.8	4681.54	2.59605	1.37632	3.68424e-27	8.61624e-26
	H3F3B	24996.6	11106	0.446242	-1.1641	4.89124e-27	1.14225e-25
	PRR14L	1594.95	4151.78	2.58367	1.36942	4.93286e-27	1.15031e-25
	TGFB1I1	1955.38	480.022	0.250716	-1.99587	5.68744e-27	1.32437e-25
	LRRC32	177.74	991.717	5.33582	2.41571	6.48724e-27	1.50845e-25
	PRR11	6217.82	2576.48	0.416191	-1.26468	6.69613e-27	1.55479e-25
	GLI1	39930.5	18940.8	0.475198	-1.0734	6.85363e-27	1.58908e-25
	ING1	4041.54	10878	2.65367	1.40799	6.94421e-27	1.60778e-25
	IL36G	24.0111	457.668	15.608	3.96421	7.00522e-27	1.61959e-25
	KRT17	25464.6	52195.2	2.04884	1.03481	7.37457e-27	1.70256e-25
	DCLRE1A	1019.39	186.64	0.189632	-2.39873	7.88042e-27	1.81676e-25
	TTN	31.7556	475.764	12.6864	3.66521	7.92176e-27	1.82369e-25
	DNAI2	2.58151	269.137	45.8405	5.51855	8.45864e-27	1.94453e-25
	SPATA31E1	13.6941	349.489	19.4026	4.27818	8.87365e-27	2.03704e-25
	SKP2	1354.09	302.977	0.229338	-2.12445	9.29868e-27	2.13159e-25
	TCIRG1	4538.44	1702.41	0.3771	-1.40698	1.01463e-26	2.32262e-25
	DDX3X	8787.51	3696.95	0.421845	-1.24521	1.02638e-26	2.34619e-25
	LYPD6	922.189	159.288	0.180843	-2.46719	1.17495e-26	2.68203e-25
	ITGA7	292.342	1295.33	4.29436	2.10244	1.2255e-26	2.79348e-25
	HLTF	2481.03	799.515	0.325223	-1.6205	1.22922e-26	2.79803e-25
	C9orf24	2.58151	268.438	45.5511	5.50941	1.3095e-26	2.97658e-25
	KIAA1279	1747.1	490.998	0.285912	-1.80636	1.41232e-26	3.20581e-25
	RGS20	340.795	1380.44	3.95867	1.98502	1.57874e-26	3.57855e-25
	OVOL1-AS1	0.89526	251.021	64.6162	6.01382	1.61998e-26	3.66691e-25
	FAM57A	897.569	129.42	0.152083	-2.71707	1.63705e-26	3.70038e-25
	EPAS1	930.707	2779.65	2.95459	1.56296	1.86188e-26	4.20272e-25
	ALKBH3-AS1	0	244.963	85.0628	6.41046	1.95536e-26	4.40757e-25
	DAZAP2	4457.01	11058.6	2.45842	1.29773	1.99342e-26	4.48713e-25
	MLLT6	2539.82	812.253	0.32219	-1.63402	2.09221e-26	4.70297e-25
	ZSWIM6	1632.02	4182.31	2.54535	1.34787	2.3521e-26	5.27984e-25
	RNF112	17.3227	383.473	17.6012	4.13761	2.5046e-26	5.61439e-25
	GRK6	2792.33	944.52	0.342197	-1.5471	2.92258e-26	6.54229e-25
	GFPT2	14856.5	30482	2.0453	1.03231	3.1679e-26	7.08167e-25
	SEC14L5	4.89786	274.096	32.7734	5.03445	3.33741e-26	7.45033e-25
	MPP2	783.746	121.694	0.163355	-2.61392	3.44469e-26	7.67925e-25
	ZZEF1	3031.69	7427.99	2.42478	1.27785	3.71057e-26	8.2606e-25
	FN3KRP	2590.15	776.97	0.303773	-1.71894	4.02714e-26	8.94565e-25
	TRAF4	1399.99	3900.46	2.75478	1.46194	4.02932e-26	8.94565e-25
	FHL2	3385.18	7727.12	2.27182	1.18385	4.03871e-26	8.95421e-25
	RNF152	162.781	889.504	5.24266	2.3903	4.07754e-26	9.02796e-25
	MAD2L1	2731.85	926.685	0.342165	-1.54724	4.15008e-26	9.17603e-25
	TRIM59	1595.66	396.093	0.252283	-1.98688	4.39686e-26	9.70844e-25
	CLCF1	1182.02	266.043	0.231361	-2.11179	4.54444e-26	1.00206e-24
	BRIP1	2083.64	637.843	0.309324	-1.69281	5.24934e-26	1.15593e-24
	BAG2	1538.95	411.003	0.272182	-1.87736	5.81069e-26	1.2778e-24
	ZNF251	559.025	1872.54	3.29971	1.72234	5.86592e-26	1.2882e-24
	LINC01000	1097.68	3049.21	2.75191	1.46043	6.3085e-26	1.38352e-24
	HAUS5	1404.67	356.63	0.259307	-1.94727	6.72615e-26	1.47312e-24
	C9	4.84573	273.205	32.6162	5.02752	6.91847e-26	1.51319e-24
	HTATSF1P2	26.4884	403.336	12.9038	3.68972	7.18195e-26	1.5687e-24
	GAL3ST4	84.2632	637.599	7.053	2.81824	7.28403e-26	1.58886e-24
	SLC12A7	4866.97	11020	2.2531	1.17191	7.899e-26	1.72069e-24
	GLUL	2621.92	873.602	0.336885	-1.56967	8.25587e-26	1.79601e-24
	MYH3	38.7047	468.282	10.6637	3.41464	9.75524e-26	2.11935e-24
	SLC7A7	10.5346	314.521	21.4817	4.42504	1.00555e-25	2.18165e-24
	KPTN	422.268	1578.19	3.65386	1.86942	1.02343e-25	2.21747e-24
	L1CAM	279.743	1235.2	4.29386	2.10228	1.02518e-25	2.2183e-24
	MTFP1	1775.56	489.255	0.279948	-1.83677	1.1363e-25	2.45548e-24
	ZNF674-AS1	165.745	898.622	5.2078	2.38067	1.19004e-25	2.56817e-24
	N4BP2L1	47.9791	497.622	9.29027	3.21572	1.20951e-25	2.60671e-24
	BAG3	3508.8	8654.7	2.42758	1.27952	1.22858e-25	2.6443e-24
	GOLGA3	2128.52	5294.01	2.47773	1.30902	1.32177e-25	2.8411e-24
	GINS3	863.324	152.415	0.184934	-2.43492	1.33193e-25	2.85914e-24
	CARD14	12.1687	351.766	21.0002	4.39233	1.51952e-25	3.25753e-24
	METTL1	12472.8	5775.55	0.465196	-1.10409	1.52448e-25	3.26384e-24
	SRSF7	6679.12	2750.73	0.4128	-1.27649	1.60625e-25	3.43437e-24
	STK17A	1506.01	4100.81	2.68218	1.42341	1.62691e-25	3.47397e-24
	TOR3A	968.029	184.208	0.197478	-2.34024	1.84066e-25	3.92521e-24
	VIL1	0.421563	243.389	69.9505	6.12826	1.9557e-25	4.16506e-24
	STXBP2	17.5403	362.275	16.3254	4.02904	1.98691e-25	4.22596e-24
	SERPINE1	6521.02	13907.9	2.12145	1.08505	2.16185e-25	4.59201e-24
	HAUS1	924.651	176.911	0.199041	-2.32886	2.31194e-25	4.90441e-24
	OR52N4	0	229.651	79.4414	6.31182	2.34154e-25	4.96071e-24
	TRIM14	999.538	202.939	0.210102	-2.25084	2.42982e-25	5.141e-24
	RUSC1	1930.54	523.349	0.274294	-1.8662	2.47568e-25	5.2312e-24
	AKAP12	6276.75	2435.38	0.389875	-1.35892	2.56063e-25	5.40367e-24
	C1orf35	550.034	58.7944	0.117546	-3.08871	2.74333e-25	5.78169e-24
	ZNF337	717.928	2504.07	3.42982	1.77813	2.77004e-25	5.8304e-24
	CBX3	5680.14	2392.86	0.423561	-1.23936	2.90381e-25	6.10403e-24
	ABLIM1	788.423	2718.73	3.4065	1.76829	3.21653e-25	6.75262e-24
	PRKAB1	1021.06	2848.65	2.76311	1.46629	3.2391e-25	6.79122e-24
	TOMM40L	487.33	42.1094	0.0981253	-3.34923	3.29063e-25	6.89033e-24
	SLC7A5	17932.2	36053.8	2.0039	1.00281	3.37582e-25	7.05961e-24
	XPNPEP3	693.987	2149.91	3.05491	1.61113	3.57574e-25	7.46804e-24
	POLN	8.4789	288.997	23.4506	4.55155	3.6177e-25	7.54596e-24
	MAP1LC3B2	524.849	1783.76	3.33999	1.73984	3.7168e-25	7.74269e-24
	NEIL3	754.74	90.829	0.129066	-2.95382	3.74261e-25	7.78646e-24
	TGFA	715.249	2195.81	3.03261	1.60056	4.6781e-25	9.72025e-24
	FOSB	106.393	767.065	6.75058	2.75501	4.83555e-25	1.00345e-23
	EMG1	2685.16	938.825	0.353054	-1.50204	4.89537e-25	1.01457e-23
	RPA2	2296.21	761.892	0.335939	-1.57373	5.10753e-25	1.05719e-23
	TOE1	914.284	160.72	0.184081	-2.44159	5.19271e-25	1.07345e-23
	CHPF2	3248.61	7581.18	2.31727	1.21243	5.37359e-25	1.10942e-23
	ARSJ	2375.76	758.596	0.32291	-1.6308	5.64682e-25	1.16435e-23
	TUBGCP5	1363.6	336.972	0.253074	-1.98237	5.69478e-25	1.17275e-23
	DTX3	24351.3	11164.5	0.457263	-1.1289	6.24608e-25	1.28465e-23
	C1orf213	141.469	808.651	5.46212	2.44946	6.28086e-25	1.29016e-23
	MTRNR2L8	2583.18	6006.35	2.30873	1.2071	6.38381e-25	1.30965e-23
	SSH2	1422.04	3661.91	2.55522	1.35345	6.51042e-25	1.33394e-23
	ITGB2-AS1	255.267	1117.19	4.24997	2.08745	6.52337e-25	1.3349e-23
	SCRN1	7695.8	3077.7	0.400642	-1.31961	6.85101e-25	1.40018e-23
	ANKRD34C	0.89526	229.857	58.7601	5.87677	7.0937e-25	1.44795e-23
	DNMT1	11291.2	5176.95	0.459727	-1.12115	7.23035e-25	1.47399e-23
	UQCC1	1316.58	3437.6	2.58962	1.37274	7.27189e-25	1.4806e-23
	VPS53	1447.14	3704.95	2.54128	1.34555	8.97458e-25	1.82498e-23
	LTA	5.26729	262.806	29.5517	4.88517	1.02735e-24	2.08651e-23
	ARHGEF25	12014.7	4902.48	0.405464	-1.30236	1.15772e-24	2.34833e-23
	SH3RF2	1597.08	454.391	0.289548	-1.78813	1.16042e-24	2.35088e-23
	VAV2	3844.74	8662.44	2.24069	1.16395	1.24547e-24	2.52002e-23
	LHX4	107.914	706.034	6.16727	2.62463	1.28661e-24	2.60002e-23
	GPD2	3446.88	1226.39	0.357219	-1.48512	1.33375e-24	2.69191e-23
	YBX3	8888.88	18672.2	2.08891	1.06275	1.34437e-24	2.70998e-23
	MGAM	1.26469	257.006	54.7524	5.77485	1.37782e-24	2.77396e-23
	FBXO21	1753.33	518.519	0.300085	-1.73656	1.62299e-24	3.26349e-23
	FEN1	6716.18	2867.46	0.429318	-1.21988	1.68868e-24	3.39138e-23
	HMGXB3	6497.87	13610.7	2.08708	1.06148	1.73596e-24	3.48203e-23
	SNED1	2653.46	6086.5	2.28203	1.19032	1.74657e-24	3.49896e-23
	PI4K2A	1842.37	4649.9	2.50166	1.32288	1.77369e-24	3.54891e-23
	INHBC	72.0468	585.635	7.44681	2.89662	1.8738e-24	3.74459e-23
	PER2	439.708	1633.73	3.6083	1.85132	1.923e-24	3.83819e-23
	HYOU1	4977.39	10662.6	2.12949	1.09051	1.94503e-24	3.87739e-23
	EDEM1	3160.83	7073.21	2.22774	1.15558	2.05311e-24	4.08781e-23
	ZMIZ1	5923.84	12678.4	2.12923	1.09033	2.11393e-24	4.20374e-23
	EDN2	65.8187	606.179	8.45683	3.08012	2.12097e-24	4.21257e-23
	RBL1	1604.05	443.137	0.281044	-1.83113	2.17931e-24	4.32315e-23
	DRAM1	1658.94	4114.61	2.46338	1.30064	2.19497e-24	4.34889e-23
	CUBN	23.594	380.457	13.255	3.72847	2.29e-24	4.53163e-23
	PVRL2	5764.94	12404.6	2.1343	1.09376	2.34964e-24	4.64397e-23
	FLJ42627	104.546	707.79	6.35857	2.6687	2.38557e-24	4.70924e-23
	MMP25	12.69	330.664	19.336	4.27321	2.39434e-24	4.72082e-23
	ATP6V1A	2189.12	5153.97	2.34096	1.2271	2.47985e-24	4.88347e-23
	SPRY4	5972.52	12515.5	2.08812	1.0622	2.62445e-24	5.16194e-23
	STXBP5-AS1	739.656	2206.38	2.94963	1.56053	2.63075e-24	5.16807e-23
	MYOF	11458.9	23121	2.01095	1.00787	2.68601e-24	5.27025e-23
	EYA3	1005.32	2831.7	2.79104	1.4808	2.69317e-24	5.27789e-23
	ADRBK1	6282.55	2757.65	0.441283	-1.18022	2.77464e-24	5.43098e-23
	MTRNR2L2	2107.14	5043.38	2.37437	1.24754	2.78018e-24	5.43527e-23
	SMC4	12626.9	6025.75	0.478905	-1.06219	2.79868e-24	5.46484e-23
	CEP131	1451.67	387.228	0.271988	-1.87838	2.86101e-24	5.57983e-23
	DDX11	1706.16	471.8	0.280737	-1.83271	2.89083e-24	5.63122e-23
	ATP6V1C1	2259.89	5579.43	2.44544	1.29009	2.94723e-24	5.73419e-23
	TIMELESS	3643.38	1319.99	0.362731	-1.46303	3.13251e-24	6.08736e-23
	CCDC13	11.9035	304.312	18.8772	4.23857	3.13745e-24	6.08967e-23
	POLE	6671.26	2929.41	0.440663	-1.18225	3.26677e-24	6.33307e-23
	KCNJ2	7545.63	3412.81	0.454127	-1.13883	3.30282e-24	6.39533e-23
	EMP2	1487.32	391.529	0.2686	-1.89647	3.74942e-24	7.25141e-23
	ITGAM	132.004	795.943	5.7843	2.53214	3.79697e-24	7.33462e-23
	LPCAT4	1222.08	257.255	0.218629	-2.19345	3.81233e-24	7.35552e-23
	RFC2	2252.52	758.811	0.341161	-1.55147	3.9322e-24	7.57779e-23
	KIAA1462	2356.2	5620.22	2.37148	1.24579	4.03963e-24	7.77557e-23
	ILF3-AS1	579.16	2012.76	3.39867	1.76497	4.08927e-24	7.86177e-23
	PARD6B	34.6023	419.844	10.5122	3.39399	4.79387e-24	9.20548e-23
	COL6A4P2	3.95047	246.746	33.1119	5.04928	4.94099e-24	9.47675e-23
	INHBA	1045.51	2941.54	2.78626	1.47833	5.72169e-24	1.09612e-22
	CANX	30717	60745.8	1.96743	0.976309	6.12647e-24	1.17228e-22
	GPCPD1	770.93	2351.12	3.03225	1.60039	6.47834e-24	1.23814e-22
	CDCA5	6376.57	2436.74	0.381866	-1.38886	6.54184e-24	1.24881e-22
	KCNS3	974.486	159.266	0.17045	-2.55258	6.57438e-24	1.25354e-22
	NSUN6	309.608	1252.76	3.94101	1.97856	6.5932e-24	1.25565e-22
	FANCA	2714.94	885.12	0.328176	-1.60746	6.73005e-24	1.28021e-22
	L3MBTL2	1483.29	412.003	0.283199	-1.82011	7.18491e-24	1.36513e-22
	KNTC1	3537.22	1248.94	0.353591	-1.49985	7.28102e-24	1.38177e-22
	DGKA	607.691	1900.67	3.08449	1.62503	7.37396e-24	1.39778e-22
	LINC00324	52.0815	501.497	8.67707	3.11721	7.57237e-24	1.43371e-22
	MYLK	935.01	2623.68	2.76572	1.46765	7.99793e-24	1.51251e-22
	DNAJB6	2168.05	5063.89	2.32175	1.21522	8.21139e-24	1.55107e-22
	EGR3	15.4801	347.433	17.2857	4.11151	9.00206e-24	1.69844e-22
	STK10	4266.58	9134.13	2.13187	1.09212	9.50259e-24	1.7908e-22
	STAB1	1.42109	251.546	52.1073	5.70341	9.65505e-24	1.81741e-22
	WDHD1	1800.18	474.066	0.265557	-1.91291	9.79808e-24	1.8422e-22
	INTS7	1561.22	442.775	0.288769	-1.79201	1.01172e-23	1.89999e-22
	CEP152	2294.93	622.51	0.273081	-1.8726	1.07865e-23	2.02334e-22
	AOX2P	0.421563	211.389	61.8428	5.95053	1.13591e-23	2.12828e-22
	FGF2	1884.03	592.036	0.318467	-1.65079	1.1416e-23	2.13648e-22
	DSN1	1309.52	333.035	0.260473	-1.9408	1.1559e-23	2.16075e-22
	KIAA1731	1319.88	330.737	0.256056	-1.96547	1.21458e-23	2.26781e-22
	CCNG1	3235.24	7127.84	2.19181	1.13212	1.37364e-23	2.56185e-22
	LOC286059	52.1902	487.882	8.42455	3.0746	1.3927e-23	2.59442e-22
	IKZF3	2.15995	226.693	41.4977	5.37496	1.41371e-23	2.63054e-22
	THRIL	6.90141	274.329	25.0188	4.64494	1.44313e-23	2.6822e-22
	NOMO1	4038.28	8822.02	2.17603	1.1217	1.45201e-23	2.69562e-22
	LPXN	237.683	1050.49	4.28754	2.10015	1.45577e-23	2.6995e-22
	ASXL3	15.7452	343.174	16.6724	4.05939	1.46491e-23	2.71334e-22
	RING1	2216.77	673.852	0.305508	-1.71072	1.53244e-23	2.8352e-22
	BOD1L1	1463.48	3770.92	2.5574	1.35468	1.57522e-23	2.91101e-22
	MEIS2	502.628	54.2437	0.119582	-3.06393	1.71868e-23	3.17251e-22
	PAPLN	610.855	1975.93	3.17248	1.66561	1.8325e-23	3.37876e-22
	KIF18A	1348.18	363.538	0.275566	-1.85953	1.98625e-23	3.65808e-22
	GTPBP2	3695.64	1295.4	0.350589	-1.51215	2.00046e-23	3.68008e-22
	ZC3H6	270.012	1131.54	4.0654	2.0234	2.0977e-23	3.85458e-22
	PRRX1	763.749	82.6796	0.117489	-3.0894	2.1333e-23	3.91556e-22
	VCAM1	1210.23	224.215	0.186896	-2.41969	2.27204e-23	4.1655e-22
	GALNT2	10218.7	20933.1	2.03774	1.02697	2.28742e-23	4.18896e-22
	COMMD2	2017.2	654.598	0.328571	-1.60572	2.32464e-23	4.25231e-22
	LRP1	6067.24	14531.7	2.36534	1.24205	2.35914e-23	4.31055e-22
	PIDD1	335.475	1273.38	3.71043	1.89159	2.40897e-23	4.39663e-22
	SPAG5	7002.93	2728.24	0.389253	-1.36122	2.45415e-23	4.47406e-22
	PABPC1	23261.9	45175.9	1.93594	0.953037	2.71364e-23	4.94156e-22
	DHCR24	3891.43	1566.88	0.405736	-1.30139	2.89313e-23	5.26251e-22
	WDR6	4492.47	1830.23	0.408199	-1.29266	2.94143e-23	5.34438e-22
	TTC16	1.73839	217.951	44.0423	5.46082	3.09206e-23	5.61176e-22
	CSF2	2207.54	5088.77	2.29281	1.19712	3.23609e-23	5.86659e-22
	PTX3	4572.49	1852.06	0.409617	-1.28765	3.31251e-23	5.99841e-22
	C17orf64	0	201.311	68.7628	6.10356	3.38789e-23	6.12807e-22
	PSCA	37.4445	421.188	9.84091	3.29879	3.52354e-23	6.36634e-22
	ISG20	142.038	798.265	5.31949	2.41129	3.88813e-23	7.01726e-22
	GCGR	38.2831	451.106	10.2579	3.35867	4.08274e-23	7.36028e-22
	MBP	12.5336	301.124	17.8137	4.15492	4.24283e-23	7.64039e-22
	IGF2R	17724	35760.3	2.0065	1.00468	4.89195e-23	8.79955e-22
	PTPN9	2404.26	791.835	0.332476	-1.58868	5.11773e-23	9.19546e-22
	UBL4A	1275.13	333.794	0.267566	-1.90203	5.26355e-23	9.447e-22
	ARFGEF2	3140.16	6992.33	2.21302	1.14602	5.66637e-23	1.01587e-21
	TBX3	1766.52	4273.64	2.40495	1.26601	6.73655e-23	1.2064e-21
	GOLGA7B	310.786	1211.99	3.79017	1.92226	7.67263e-23	1.37252e-21
	MTRNR2L1	2010.41	4684.42	2.31284	1.20967	8.28966e-23	1.48126e-21
	CPLX3	1.36896	208.932	46.6932	5.54514	8.31389e-23	1.48396e-21
	SHOX2	870.732	145.193	0.174846	-2.51585	8.44565e-23	1.50582e-21
	MED8	1577.04	472.001	0.304523	-1.71537	8.54816e-23	1.52242e-21
	CEP78	1464.27	421.491	0.293293	-1.76958	9.1562e-23	1.6279e-21
	ISOC1	2430.94	877.456	0.364796	-1.45484	9.16053e-23	1.6279e-21
	KIF4A	3223.72	1112.72	0.345392	-1.53369	9.77438e-23	1.73509e-21
	RAB7A	10311.3	21213.3	2.04544	1.03241	1.04106e-22	1.84601e-21
	PLA2G12B	0	194.838	66.4559	6.05433	1.05439e-22	1.8676e-21
	GGT1	475.031	1568.02	3.24573	1.69854	1.06514e-22	1.88458e-21
	SOX12	796.69	113.666	0.151341	-2.72413	1.12281e-22	1.98445e-21
	MAP3K4	1933.66	580.795	0.303818	-1.71872	1.13643e-22	2.00634e-21
	FAM129B	11264	22200.9	1.96678	0.975832	1.1479e-22	2.02437e-21
	SPSB1	2566.53	5980.95	2.31413	1.21047	1.15361e-22	2.03223e-21
	HSP90B1	24999.3	47936.9	1.91284	0.935714	1.21974e-22	2.1464e-21
	RPL23AP53	546.022	1798.91	3.22698	1.69018	1.22819e-22	2.15893e-21
	CCHCR1	2109.26	723.902	0.347158	-1.52633	1.23085e-22	2.16125e-21
	GRM4	12.4815	288.483	17.2226	4.10623	1.24576e-22	2.18507e-21
	DCTPP1	1802.67	463.402	0.25851	-1.95171	1.27602e-22	2.23573e-21
	SFXN1	4696.06	1897.57	0.406132	-1.29998	1.28086e-22	2.24178e-21
	HHATL	0.473697	199.871	57.4358	5.84388	1.29167e-22	2.25827e-21
	CDC45	2431.37	878.073	0.364785	-1.45488	1.29945e-22	2.26942e-21
	KDM2A	6462.73	13244.6	2.03992	1.02851	1.32571e-22	2.31278e-21
	EXOG	970.989	187.997	0.20126	-2.31287	1.36638e-22	2.38117e-21
	ALB	4.79359	240.956	28.3067	4.82307	1.45721e-22	2.53673e-21
	LAMP1	13319.4	27136.5	2.02577	1.01847	1.50656e-22	2.61983e-21
	KLHL30	42.7549	479.309	9.90916	3.30876	1.53857e-22	2.67263e-21
	ZNF367	1522.8	412.188	0.274841	-1.86333	1.55089e-22	2.69115e-21
	STAMBPL1	740.162	114.953	0.165097	-2.59861	1.60166e-22	2.77627e-21
	SLC4A2	4662.62	1931.57	0.415619	-1.26667	1.62702e-22	2.81722e-21
	TBX18	1039.88	235.574	0.23391	-2.09597	1.64838e-22	2.85115e-21
	NPC1L1	2.15995	215.001	39.2074	5.29306	1.67883e-22	2.89855e-21
	RAB1A	4619.98	9617.52	2.07305	1.05175	1.67936e-22	2.89855e-21
	LOC101928773	0	191.961	65.4147	6.03154	1.76842e-22	3.04901e-21
	SOX18	7755.91	3537.78	0.454436	-1.13785	1.97193e-22	3.39629e-21
	MYOM1	3.21161	223.547	33.9654	5.08599	1.97983e-22	3.40628e-21
	SYDE1	4700.36	2037.46	0.436048	-1.19744	2.00095e-22	3.43896e-21
	CDC25A	1370.61	385.171	0.28689	-1.80143	2.10664e-22	3.61677e-21
	RRAGC	2385.02	5606.3	2.33626	1.2242	2.30524e-22	3.95355e-21
	GRIK5	10.4824	295.246	19.6752	4.2983	2.48332e-22	4.25446e-21
	SYNDIG1L	1.31682	203.132	45.4762	5.50704	2.48698e-22	4.25622e-21
	ERAL1	2347.52	802.331	0.34545	-1.53345	2.5536e-22	4.36563e-21
	DFNA5	1288.08	3223	2.48239	1.31173	2.59507e-22	4.43185e-21
	MESDC2	2111.54	718.19	0.343823	-1.54026	2.66006e-22	4.53806e-21
	LARP4B	3222.26	6951.34	2.14783	1.10288	2.68317e-22	4.57267e-21
	CAMSAP3	4.84573	236.693	27.7289	4.79332	2.68883e-22	4.57751e-21
	DLGAP1-AS3	0.421563	194.715	56.3263	5.81574	2.89871e-22	4.92718e-21
	RPS19	24247.7	56943.2	2.30677	1.20587	2.90031e-22	4.92718e-21
	PSIP1	1828.76	574.605	0.318374	-1.65121	3.2747e-22	5.55739e-21
	EXOSC2	1547.48	468.486	0.307962	-1.69917	3.63891e-22	6.16902e-21
	EML4	3597.63	1477.19	0.413331	-1.27463	3.88471e-22	6.57884e-21
	ADAMTS2	3084.62	6678.87	2.1589	1.1103	4.17769e-22	7.06762e-21
	KPNA2	13423.9	6462.7	0.483149	-1.04946	4.19208e-22	7.08458e-21
	POLE2	705.7	107.887	0.162225	-2.62393	4.24428e-22	7.16531e-21
	DIS3L	1208.82	317.651	0.268894	-1.89489	4.45717e-22	7.5169e-21
	CENPB	4701.08	1983.4	0.424558	-1.23597	4.46808e-22	7.52009e-21
	SAMD9L	824.098	164.514	0.207494	-2.26886	4.46834e-22	7.52009e-21
	ETV4	2889.16	1048.27	0.365068	-1.45376	4.50703e-22	7.57733e-21
	KDM7A	254.514	1083.47	4.13113	2.04654	4.59469e-22	7.71669e-21
	FOXL1	996.648	2976.8	2.93347	1.55261	4.76506e-22	7.99454e-21
	GNPNAT1	1283.27	333.453	0.265639	-1.91246	4.85206e-22	8.13209e-21
	ASXL1	6492.26	2871.14	0.443355	-1.17347	4.8795e-22	8.16964e-21
	CCDC184	1075.66	265.488	0.253753	-1.9785	4.89503e-22	8.18718e-21
	IGF2BP1	4668.58	1977.73	0.426	-1.23107	4.9052e-22	8.19574e-21
	GCM1	0.473697	191.936	55.2595	5.78815	4.98204e-22	8.31554e-21
	NXPH2	283.559	9.3776	0.0487644	-4.35803	5.17059e-22	8.62137e-21
	EPHA1-AS1	4.10687	238.572	30.6043	4.93566	5.52534e-22	9.2034e-21
	GABPB1-AS1	351.903	1274.85	3.54287	1.82492	5.56531e-22	9.26047e-21
	MARCKS	3706.95	1314.86	0.356548	-1.48783	6.00645e-22	9.98426e-21
	BMF	225.168	973.396	4.20165	2.07095	6.0795e-22	1.00953e-20
	AP1G1	3292.22	7028.75	2.1253	1.08767	6.15711e-22	1.02137e-20
	RGS16	86.5229	625.312	6.6697	2.73762	6.2282e-22	1.03211e-20
	EXO1	1550.62	365.062	0.237415	-2.07451	6.24867e-22	1.03444e-20
	PNN	6301.3	12791.7	2.02179	1.01563	6.34195e-22	1.04882e-20
	ABI2	3344.95	1191.85	0.357625	-1.48348	6.54481e-22	1.08126e-20
	NUP205	4877.1	2114.85	0.435912	-1.19789	6.66007e-22	1.09918e-20
	CCNF	2658.92	1006.47	0.381967	-1.38848	6.78468e-22	1.11861e-20
	TULP4	739.711	2181.71	2.90631	1.53919	6.85388e-22	1.12887e-20
	PECAM1	0.843126	207.586	50.1916	5.64937	7.49701e-22	1.23354e-20
	POR	3622.83	7639.24	2.09972	1.0702	7.58827e-22	1.24729e-20
	CTRL	22.2296	349.288	12.7933	3.67732	7.87568e-22	1.29322e-20
	LCE1B	0	183.822	62.434	5.96426	7.93779e-22	1.3021e-20
	TRIM6	602.759	75.769	0.136073	-2.87754	8.04056e-22	1.31763e-20
	POLR2J4	231.417	977.81	4.0966	2.03443	8.24376e-22	1.34956e-20
	CD7	1.79052	200.952	40.2121	5.32956	8.44086e-22	1.38043e-20
	TKT	10159.6	20108.6	1.96825	0.97691	9.60374e-22	1.56903e-20
	MCM10	2058.89	677.845	0.333022	-1.58631	1.04265e-21	1.70174e-20
	ANXA4	1220.78	3275.67	2.64941	1.40567	1.04488e-21	1.70365e-20
	CX3CR1	0	182.39	61.8787	5.95137	1.05359e-21	1.71613e-20
	TRIP13	4922.54	2101.58	0.428916	-1.22123	1.11308e-21	1.81121e-20
	INPP5J	121.764	694.103	5.39965	2.43287	1.11553e-21	1.81338e-20
	PLXNA2	2642.38	6007.95	2.26335	1.17846	1.17178e-21	1.9029e-20
	AFF4	6436.89	12889.9	1.99598	0.997095	1.22378e-21	1.98536e-20
	LRP2	7.00567	245.783	22.4084	4.48597	1.23962e-21	2.00905e-20
	CDC25C	1236.24	311.585	0.257496	-1.95738	1.31359e-21	2.12682e-20
	CDCA2	1815.86	539.382	0.301746	-1.72859	1.32258e-21	2.13922e-20
	C2CD5	1240.32	333.467	0.275287	-1.86099	1.32549e-21	2.1418e-20
	SLC25A40	1301.54	359.191	0.28185	-1.827	1.33806e-21	2.15995e-20
	PGF	295.637	1291.7	4.2491	2.08716	1.44869e-21	2.33621e-20
	METTL17	1811.03	603.939	0.338138	-1.56431	1.48025e-21	2.38474e-20
	ETV6	1304.64	3740.27	2.82689	1.49922	1.51489e-21	2.43812e-20
	GPSM2	2009.01	644.789	0.324739	-1.62265	1.55756e-21	2.50431e-20
	MYRIP	0.89526	189.684	47.6638	5.57482	1.56189e-21	2.50878e-20
	PHF2	2507.65	912.18	0.366387	-1.44856	1.60773e-21	2.57985e-20
	SCN11A	3.5289	214.317	30.3945	4.92574	1.64245e-21	2.63296e-20
	RBFOX3	19.9564	342.088	13.7213	3.77834	1.65352e-21	2.64808e-20
	C16orf59	579.716	85.7231	0.158904	-2.65377	1.67551e-21	2.68065e-20
	PDE4C	13.7417	2648.36	53.9413	5.75332	1.78418e-21	2.8517e-20
	KDR	115.346	684.956	5.61603	2.48955	1.79184e-21	2.86111e-20
	TMEM30A	13141.1	25604.1	1.94332	0.958523	1.80419e-21	2.87801e-20
	PIK3CB	1312.91	349.709	0.271761	-1.87959	1.89595e-21	3.0214e-20
	FLJ44511	12.5858	280.561	16.5687	4.05038	1.91154e-21	3.04325e-20
	PDLIM7	4339.25	1892.48	0.438765	-1.18848	1.91941e-21	3.05278e-20
	TRIM69	10.9517	312.585	19.7389	4.30297	2.01381e-21	3.19979e-20
	LOC101060091	11.0559	288.539	18.7659	4.23004	2.07527e-21	3.29422e-20
	DBF4B	2065.52	728.626	0.35732	-1.48471	2.09244e-21	3.31822e-20
	LOC101928292	0.473697	186.353	52.8215	5.72305	2.14344e-21	3.39578e-20
	IKBIP	2407.9	5551.63	2.27826	1.18793	2.27073e-21	3.59391e-20
	SV2A	2380.09	758.047	0.320401	-1.64205	2.32465e-21	3.67568e-20
	TMEM223	643.997	97.895	0.161798	-2.62773	2.43199e-21	3.84164e-20
	CENPO	2622.48	966.797	0.371455	-1.42874	2.51593e-21	3.97037e-20
	FTL	24883.1	46843.8	1.8785	0.909577	2.67299e-21	4.21411e-20
	MRPL3	3440.66	1430.5	0.418882	-1.25538	3.02529e-21	4.76491e-20
	SEZ6	10.5346	266.391	17.9581	4.16656	3.08045e-21	4.84708e-20
	CBX6	2042.2	656.633	0.326149	-1.61639	3.13927e-21	4.93483e-20
	NF2	2640.6	5725.62	2.15959	1.11076	3.23644e-21	5.08266e-20
	KLHL21	1484.84	4107.61	2.7339	1.45096	3.30822e-21	5.19035e-20
	NEDD1	2372.59	840.133	0.356822	-1.48672	3.39923e-21	5.32798e-20
	SLC39A1	5123.34	2227.55	0.436323	-1.19653	3.41855e-21	5.35309e-20
	KANK2	13827	26525.6	1.91125	0.934515	3.45273e-21	5.40139e-20
	TNRC6C	1424.48	3420.79	2.38338	1.25301	3.45648e-21	5.40203e-20
	RALGDS	840.989	2272.83	2.67444	1.41924	3.46412e-21	5.40876e-20
	PDE6G	4.26776	276.96	31.4312	4.97412	3.48838e-21	5.44141e-20
	GNA15	14.1156	282.055	15.1682	3.92298	3.51833e-21	5.48284e-20
	ALK	8.27036	254.343	20.4185	4.35181	3.56072e-21	5.54357e-20
	SMARCC2	4378.58	1698.19	0.390263	-1.35748	3.95651e-21	6.15385e-20
	ARHGAP29	3636.73	1538.93	0.426119	-1.23067	4.40869e-21	6.85058e-20
	RAB27A	1691.54	496.89	0.296777	-1.75255	4.5739e-21	7.10049e-20
	PRRC2A	17438.7	7852.82	0.448846	-1.15571	4.68259e-21	7.26227e-20
	GPT2	1005.79	240.715	0.246418	-2.02082	5.11194e-21	7.92058e-20
	LOC401286	4.94999	218.959	25.5007	4.67247	5.2e-21	8.04932e-20
	ZFYVE1	756.816	2095.84	2.73736	1.45279	5.2303e-21	8.0885e-20
	UBTF	6013.5	2648	0.441883	-1.17826	5.36334e-21	8.28633e-20
	RGS4	506.498	62.8865	0.137868	-2.85864	5.4512e-21	8.41406e-20
	NUPR1	34.2805	377.464	9.5671	3.25808	5.56171e-21	8.57129e-20
	TONSL	1143.24	306.731	0.274923	-1.8629	5.56364e-21	8.57129e-20
	SZT2	2632.09	5837.1	2.20259	1.1392	5.71125e-21	8.79034e-20
	TEX101	0.421563	181.138	51.6731	5.69134	5.91446e-21	9.09447e-20
	SREBF2	3127.55	6643.54	2.11547	1.08098	6.01433e-21	9.23926e-20
	FUT5	5.63223	247.682	26.0205	4.70158	6.05344e-21	9.29054e-20
	MTF1	809.841	2237.94	2.72235	1.44485	6.16957e-21	9.45981e-20
	TEKT1	0	173.616	58.3773	5.86734	6.41069e-21	9.82024e-20
	DTX4	2066.42	4620.19	2.22367	1.15294	6.95787e-21	1.06484e-19
	CDH13	6190.21	12270.3	1.97598	0.982566	7.03742e-21	1.076e-19
	UAP1	2888.56	1155.67	0.403607	-1.30898	7.25005e-21	1.10746e-19
	POMGNT2	1090.25	269.703	0.253935	-1.97747	7.42301e-21	1.13281e-19
	ZKSCAN5	850.659	2318.91	2.69809	1.43194	7.70381e-21	1.17456e-19
	BTAF1	4058.91	8330.34	2.0441	1.03147	7.71847e-21	1.17569e-19
	GRN	10749.9	21070.8	1.95298	0.965677	8.11295e-21	1.23462e-19
	SOCS3	3482.61	7292.46	2.08467	1.05982	8.20973e-21	1.24817e-19
	EHMT2	2527.41	883.568	0.351531	-1.50828	8.38299e-21	1.27332e-19
	NUP62	5055.65	2290.44	0.455417	-1.13474	8.59348e-21	1.30407e-19
	CASD1	1067.88	243.147	0.235165	-2.08826	8.62172e-21	1.30713e-19
	SPATA13	3763.92	7856.36	2.07962	1.05632	8.75913e-21	1.32672e-19
	BCL9	1188.57	323.268	0.277604	-1.8489	9.01481e-21	1.36417e-19
	WNK4	129.604	699.609	5.12422	2.35733	9.46084e-21	1.43033e-19
	PYY2	17.9528	346.877	15.0547	3.91214	9.80625e-21	1.48117e-19
	COX7A2L	3286.41	7224.52	2.18029	1.12452	1.04116e-20	1.57114e-19
	RFPL1S	0.421563	176.177	50.5066	5.6584	1.08666e-20	1.63828e-19
	RAG1	43.1855	413.524	8.45537	3.07987	1.09807e-20	1.65394e-19
	MRPL17	1764.14	597.343	0.343337	-1.5423	1.111e-20	1.67187e-19
	PLEKHO1	1752.18	568.451	0.3304	-1.59771	1.12697e-20	1.69433e-19
	RAD21	11697.6	5909.83	0.506942	-0.980108	1.13728e-20	1.70825e-19
	GPR180	1004.15	248.875	0.255227	-1.97014	1.14201e-20	1.71375e-19
	GTPBP3	837.856	177.118	0.219359	-2.18864	1.14878e-20	1.72232e-19
	COL22A1	1113.07	2893.9	2.55278	1.35207	1.28746e-20	1.92667e-19
	RQCD1	3137.02	1286.59	0.413038	-1.27565	1.28726e-20	1.92667e-19
	INPPL1	2660.96	1031.61	0.390054	-1.35825	1.30139e-20	1.94572e-19
	ATP1B1	1649.49	526.46	0.323805	-1.6268	1.38008e-20	2.06147e-19
	YWHAH	5213.17	2241.74	0.431029	-1.21414	1.4138e-20	2.1099e-19
	ENDOU	5.11089	238.945	25.9	4.69488	1.42815e-20	2.12935e-19
	DNAH12	2.73791	934.843	57.8919	5.85529	1.48895e-20	2.21797e-19
	WDFY3	3338.48	7019.3	2.09178	1.06473	1.51375e-20	2.25283e-19
	GPR132	1.26469	201.483	42.3651	5.4048	1.52601e-20	2.26899e-19
	CHST10	959.197	230.855	0.248553	-2.00838	1.56362e-20	2.32278e-19
	MDM4	921.732	2715.91	2.87417	1.52315	1.67066e-20	2.47952e-19
	ANK1	228.075	982.581	4.21516	2.07559	1.6793e-20	2.49006e-19
	DUSP10	448.851	1436.44	3.14473	1.65294	1.7355e-20	2.57104e-19
	ENO1-AS1	2.68578	195.305	32.1272	5.00572	1.79061e-20	2.65026e-19
	CDKN3	2705.73	1004.28	0.37445	-1.41716	1.81657e-20	2.68624e-19
	FAM102A	863.535	2294.26	2.62842	1.39419	1.86854e-20	2.76057e-19
	LSMEM2	0.473697	173.771	49.4159	5.6269	1.94482e-20	2.87064e-19
	UBXN7	798.895	2266.23	2.80197	1.48644	1.97732e-20	2.91596e-19
	STK39	1179.01	329.399	0.285877	-1.80653	2.03698e-20	3.00121e-19
	NUP85	4824.07	2128.18	0.443611	-1.17263	2.10237e-20	3.09474e-19
	SLC6A6	4436.38	9004.89	2.02082	1.01494	2.12465e-20	3.1247e-19
	LCE1C	5.31942	216.146	23.8195	4.57407	2.13388e-20	3.13542e-19
	NR2F6	803.173	122.971	0.163753	-2.61041	2.16852e-20	3.18345e-19
	CENPU	2474.13	952.158	0.387942	-1.36609	2.20066e-20	3.2277e-19
	UBN1	3390.11	7745.43	2.26201	1.1776	2.2655e-20	3.3198e-19
	MFNG	4.79359	220.514	25.5022	4.67255	2.28394e-20	3.3438e-19
	SKA1	1016.71	231.214	0.235112	-2.08858	2.32955e-20	3.40749e-19
	TRIM65	1034.99	261.707	0.259697	-1.9451	2.59579e-20	3.7935e-19
	LRRC45	1333.91	399.727	0.30525	-1.71194	2.63362e-20	3.84532e-19
	HDGFRP3	2179.84	812.151	0.376626	-1.4088	2.77842e-20	4.05309e-19
	SGMS2	795.369	152.039	0.199616	-2.3247	3.06173e-20	4.46236e-19
	CD79A	9.95212	257.99	18.0891	4.17705	3.09931e-20	4.51307e-19
	ZC3H11A	2226.7	4883.76	2.18245	1.12595	3.19248e-20	4.64458e-19
	RANBP2	3823.32	7808.39	2.03374	1.02413	3.22045e-20	4.68106e-19
	USP21	875.942	202.926	0.239878	-2.05963	3.2963e-20	4.78702e-19
	FAM189B	876.443	176.324	0.208683	-2.26061	3.41347e-20	4.95275e-19
	LIF	4628.36	9472.23	2.04143	1.02958	3.55975e-20	5.16036e-19
	CACNB3	618.477	106.248	0.182512	-2.45394	3.60547e-20	5.22196e-19
	SYNE1	1656.42	4530.86	2.69336	1.42941	3.87413e-20	5.60607e-19
	MICAL2	3582.68	7426.61	2.05829	1.04144	3.91854e-20	5.66528e-19
	DENND4B	2172.55	803.438	0.373309	-1.42156	3.97046e-20	5.73523e-19
	KIF26A	781.945	165.222	0.22019	-2.18318	4.00989e-20	5.78702e-19
	STIP1	17421	35049.3	1.98675	0.990412	4.05213e-20	5.84278e-19
	UCK2	1777.77	573.86	0.326733	-1.61382	4.07013e-20	5.86352e-19
	HTR4	0	163.562	54.8475	5.77735	4.27574e-20	6.15426e-19
	PADI4	0.421563	174.23	48.7376	5.60696	4.33417e-20	6.23283e-19
	PRMT8	10.8995	276.145	17.7734	4.15165	4.40352e-20	6.32694e-19
	CHEK1	778.316	151.104	0.202936	-2.3009	4.51529e-20	6.48178e-19
	TREM2	0.421563	173.747	48.652	5.60443	4.68631e-20	6.72132e-19
	RPUSD3	769.599	150.068	0.203493	-2.29695	5.01643e-20	7.18845e-19
	CSF2RB	12.9597	288.869	16.1929	4.01729	5.12176e-20	7.33289e-19
	LINC00552	4.3199	212.282	26.0991	4.70593	5.13674e-20	7.34785e-19
	TP53TG1	279.947	1066.96	3.71929	1.89503	5.26759e-20	7.52838e-19
	CACNA1S	3.58104	212.236	28.6622	4.84108	5.37832e-20	7.67986e-19
	CEP85	2879.45	1177.39	0.412326	-1.27814	5.72052e-20	8.16131e-19
	NPLOC4	10171.1	19572	1.91553	0.937741	5.8465e-20	8.33371e-19
	FAM135B	0.473697	170.283	47.6584	5.57466	5.85722e-20	8.34164e-19
	ZNF561	616.673	1767.16	2.8301	1.50086	5.92472e-20	8.43037e-19
	MXD3	1383.59	404.025	0.297147	-1.75075	6.2837e-20	8.93333e-19
	ZIC1	584.622	82.3899	0.151921	-2.71861	6.39253e-20	9.08008e-19
	C17orf89	941.01	2408.35	2.5352	1.3421	6.54252e-20	9.28499e-19
	CDKN2D	1320.89	401.076	0.309308	-1.69288	6.6591e-20	9.44217e-19
	CYP2E1	0.473697	170.832	47.7937	5.57875	6.74414e-20	9.5544e-19
	PXMP4	738.494	129.568	0.184892	-2.43524	6.79521e-20	9.61833e-19
	PRKD3	3637.96	1529.66	0.422361	-1.24345	6.9203e-20	9.78685e-19
	WNT2B	73.7897	549.993	6.80562	2.76673	6.92655e-20	9.78715e-19
	HIST1H2BJ	40.5518	392.223	8.49119	3.08597	6.99145e-20	9.87025e-19
	CATSPERG	5.89739	221.622	22.6958	4.50435	7.06365e-20	9.96349e-19
	CCDC85C	2446.63	913.06	0.37575	-1.41215	7.75228e-20	1.09253e-18
	NCAPH2	3528.17	1526.18	0.435562	-1.19905	7.78626e-20	1.09637e-18
	DNAJC1	1628.06	514.39	0.321506	-1.63708	8.63721e-20	1.21513e-18
	UBR3	1800.22	4030.11	2.22492	1.15375	8.9634e-20	1.25993e-18
	RNASEH2B	781.711	165.38	0.220171	-2.1833	9.08423e-20	1.27581e-18
	ATG2A	2249.61	4860.06	2.14973	1.10416	9.19981e-20	1.29092e-18
	CACNA1E	8.4789	233.204	18.5294	4.21174	9.4619e-20	1.32655e-18
	MDFIC	2437.11	900.226	0.372588	-1.42435	9.63301e-20	1.34937e-18
	SEMA3B	278.995	1091.8	3.81434	1.93143	9.68441e-20	1.3554e-18
	MELK	1505.27	488.389	0.329021	-1.60375	1.01388e-19	1.41777e-18
	YEATS4	659.287	109.26	0.174521	-2.51853	1.09352e-19	1.52782e-18
	CD200	13.9026	267.295	14.5155	3.85952	1.101e-19	1.53694e-18
	DOCK10	3720.66	1632.57	0.441433	-1.17973	1.11327e-19	1.55273e-18
	MYD88	1535.48	499.354	0.330237	-1.59843	1.16761e-19	1.62712e-18
	CDC23	2757	1111.72	0.406665	-1.29809	1.18476e-19	1.64819e-18
	PLEKHA5	1645.59	542.788	0.334532	-1.57978	1.18438e-19	1.64819e-18
	VWA5A	802.232	2124.16	2.61962	1.38936	1.19268e-19	1.65779e-18
	HNRNPUL2	3800.62	1620.79	0.42968	-1.21867	1.33635e-19	1.85589e-18
	KCNN3	273.868	1065.9	3.74548	1.90515	1.37571e-19	1.90891e-18
	SYNE3	246.4	1019.52	4.00892	2.00322	1.44534e-19	2.00382e-18
	LZTS2	1939.91	648.787	0.337104	-1.56873	1.47233e-19	2.03949e-18
	FOXN3	2023.09	4420.11	2.17268	1.11948	1.49139e-19	2.06413e-18
	SOX2	1153.92	2794.1	2.40278	1.2647	1.61226e-19	2.22952e-18
	LDLRAP1	1003.44	261.924	0.268242	-1.89839	1.6216e-19	2.24051e-18
	LOC400684	40.1779	381.725	8.37829	3.06666	1.73781e-19	2.39904e-18
	SLC1A6	0.843126	178.394	42.5209	5.4101	1.75734e-19	2.42393e-18
	PGP	1739.94	610.115	0.355406	-1.49246	1.77506e-19	2.44629e-18
	KDM4B	1196.96	2934.96	2.4429	1.28859	1.7865e-19	2.45996e-18
	AP1S1	1797.92	3996.08	2.20927	1.14357	1.80768e-19	2.48702e-18
	ITGA5	8572.5	16300.9	1.89455	0.921854	1.86131e-19	2.55863e-18
	CENPA	1229.58	330.209	0.273336	-1.87125	1.87927e-19	2.58114e-18
	DHRS13	337.062	22.8849	0.0836368	-3.57972	1.8912e-19	2.59531e-18
	GCNT1	615.995	110.088	0.189596	-2.399	1.89807e-19	2.60254e-18
	UBC	25892.8	51082.5	1.9547	0.966947	1.90738e-19	2.6131e-18
	ABHD10	1195.18	327.964	0.280727	-1.83276	1.94014e-19	2.65572e-18
	ZBTB20	65.345	550.361	7.61408	2.92867	1.97436e-19	2.70029e-18
	MAB21L3	3.5289	191.443	26.9589	4.75269	2.1565e-19	2.94691e-18
	PSAP	34305.2	63517.1	1.84749	0.885567	2.29136e-19	3.12857e-18
	ATP6V1E1	4386.12	9103.77	2.0595	1.04229	2.4514e-19	3.34163e-18
	SH2D4B	4.74146	209.742	24.1892	4.59629	2.45153e-19	3.34163e-18
	MTAP	786.534	164.415	0.21789	-2.19833	2.56376e-19	3.49166e-18
	PITX1	1149.96	314.47	0.280551	-1.83366	2.89178e-19	3.93511e-18
	FBN2	8827.65	17515.8	1.97659	0.983011	2.9104e-19	3.95711e-18
	RNF26	1846.76	660.943	0.361912	-1.46629	2.94926e-19	4.00573e-18
	TDRD7	665.631	126.58	0.200507	-2.31828	2.9511e-19	4.00573e-18
	SLC25A12	1033.72	198.067	0.197446	-2.34047	3.07689e-19	4.17298e-18
	BORA	794.938	165.898	0.217983	-2.19771	3.28551e-19	4.4522e-18
	CENPF	13483.8	6859.19	0.508663	-0.975219	3.43796e-19	4.65489e-18
	OLFM1	3801.97	8447.32	2.19636	1.13511	3.58648e-19	4.85193e-18
	GINS2	1970.44	717.205	0.36888	-1.43878	3.70934e-19	5.01395e-18
	BEND3	458.599	52.86	0.128712	-2.95778	3.93187e-19	5.31032e-18
	DOK1	783.211	171.025	0.228024	-2.13274	3.97848e-19	5.36879e-18
	CNGB1	17.1663	290.18	13.1466	3.71662	4.11499e-19	5.54838e-18
	GPR157	55.6625	440.366	7.15657	2.83927	4.22648e-19	5.69398e-18
	PRKAA1	3441.22	1319.69	0.385307	-1.37592	4.34001e-19	5.84208e-18
	ADCY10P1	57.0881	461.077	7.21592	2.85118	4.51897e-19	6.07791e-18
	LOC101927045	89.5349	541.284	5.64406	2.49673	4.66483e-19	6.26889e-18
	SYNCRIP	6169.12	3007.12	0.489674	-1.03011	4.74619e-19	6.37294e-18
	MRPL16	1804.98	646.156	0.362653	-1.46334	4.83055e-19	6.48085e-18
	NUP160	3274.99	1316.06	0.403958	-1.30772	4.86311e-19	6.51914e-18
	SLU7	2015.32	4359.6	2.15129	1.1052	4.89089e-19	6.55096e-18
	PIP5K1C	2033.93	4410.74	2.15555	1.10806	4.94353e-19	6.61601e-18
	COL7A1	32579.2	62542.4	1.90575	0.930358	4.98454e-19	6.66538e-18
	GABBR2	48.2964	419.329	7.64411	2.93435	5.16575e-19	6.90201e-18
	C9orf169	9.74359	232.289	16.5825	4.05159	5.23853e-19	6.98773e-18
	TNFAIP1	1952.76	4494.79	2.27978	1.1889	5.23544e-19	6.98773e-18
	TMC8	16.2234	270.848	12.8997	3.68927	5.26143e-19	7.01249e-18
	ZNF385A	234.633	935.95	3.87091	1.95267	5.29236e-19	7.04793e-18
	LINC00202-1	3.58104	187.024	26.2136	4.71224	5.43719e-19	7.23486e-18
	TRAF5	1159.5	340.463	0.299956	-1.73718	5.87336e-19	7.80882e-18
	MSI2	1259.82	3022.64	2.37824	1.24989	5.92595e-19	7.87229e-18
	PGC	0.473697	156.917	44.1063	5.46291	6.55558e-19	8.70158e-18
	WDR19	423.154	1435.17	3.29596	1.7207	6.68088e-19	8.86064e-18
	ATP6V0E1	6194.81	12758.4	2.04416	1.03151	6.73845e-19	8.92968e-18
	CTNNAL1	3836.42	1728.64	0.452979	-1.14249	6.91597e-19	9.15745e-18
	SMC2	4515.37	2037.47	0.453063	-1.14222	7.12975e-19	9.4328e-18
	LOC730101	1010.41	252.718	0.256856	-1.96097	7.18959e-19	9.50422e-18
	PAIP2	3933.08	7828.65	1.98156	0.986637	7.35753e-19	9.71829e-18
	PPP2R5D	2726.45	1135.26	0.419805	-1.25221	7.40933e-19	9.77875e-18
	WRAP73	1171.27	344.796	0.301461	-1.72996	7.41803e-19	9.78227e-18
	LOC100287036	53.4549	427.476	7.17791	2.84356	7.43135e-19	9.79186e-18
	WFIKKN2	0	150.31	49.6851	5.63474	7.44486e-19	9.80169e-18
	ATP6V0D1	3066.82	6780.09	2.18748	1.12927	7.49254e-19	9.85646e-18
	PIK3R5	12.6424	250.337	14.4857	3.85656	7.59954e-19	9.98911e-18
	UBR7	3701.01	1621.45	0.441307	-1.18015	7.65622e-19	1.00555e-17
	LINC00673	707.677	1900.37	2.65527	1.40886	7.6712e-19	1.0067e-17
	PNMA1	2445.06	962.924	0.397327	-1.3316	8.12704e-19	1.06566e-17
	ASPRV1	17.9052	275.49	12.1594	3.60401	8.33519e-19	1.09207e-17
	DOK7	10.7386	312.424	19.3726	4.27594	8.67411e-19	1.13555e-17
	FARSA	3145.51	1360.93	0.435723	-1.19852	8.74791e-19	1.14429e-17
	JRK	2376.5	4997.74	2.09272	1.06538	8.77659e-19	1.14619e-17
	RAB8A	3193.68	1387.43	0.437542	-1.19251	8.77013e-19	1.14619e-17
	ZNF451	1217.14	2869.18	2.33911	1.22596	8.84419e-19	1.15409e-17
	CCDC150	593.219	106.911	0.191334	-2.38583	9.15574e-19	1.19378e-17
	MUC6	2.21208	178.939	31.0695	4.95743	9.21036e-19	1.19994e-17
	AADAC	126.862	647.577	4.85496	2.27946	9.51754e-19	1.23896e-17
	MAPK1	6976.01	3410.81	0.490737	-1.02698	9.71186e-19	1.26324e-17
	HSPH1	9812.08	19479.3	1.95743	0.968957	1.00993e-18	1.31258e-17
	LOC101929690	736.896	2060.72	2.73869	1.45348	1.01683e-18	1.3205e-17
	HSD17B11	1449.52	475.311	0.333156	-1.58573	1.03089e-18	1.33768e-17
	RRM1	13125.6	6889.16	0.526324	-0.925977	1.05086e-18	1.36251e-17
	ZNF394	466.797	1494.18	3.15037	1.65552	1.08685e-18	1.40804e-17
	VPS4B	1686.83	3918.52	2.2966	1.1995	1.13665e-18	1.47138e-17
	ARVCF	230.19	938.34	3.93082	1.97483	1.15047e-18	1.48809e-17
	RMND5B	1456.12	420.914	0.296358	-1.75459	1.15203e-18	1.48891e-17
	SMTN	4828.71	9897.36	2.03	1.02148	1.18682e-18	1.53265e-17
	FRMD4B	386.083	40.857	0.12094	-3.04764	1.2207e-18	1.57516e-17
	PALD1	59.7172	441.954	6.74221	2.75322	1.29561e-18	1.67048e-17
	RPS19BP1	1695.83	592.95	0.354369	-1.49667	1.31239e-18	1.69077e-17
	SAMD9	915.087	226.835	0.255746	-1.96722	1.32244e-18	1.70237e-17
	DTL	2970.11	1216	0.411584	-1.28074	1.39173e-18	1.79014e-17
	GAS6-AS1	9.90448	267.596	17.9339	4.16462	1.3979e-18	1.79666e-17
	IGFBP7	19188.1	35907.2	1.86119	0.896222	1.40201e-18	1.8005e-17
	DIAPH1	8474.41	4164.45	0.492984	-1.02039	1.4389e-18	1.84642e-17
	E2F8	764.749	135.515	0.185341	-2.43175	1.45337e-18	1.86351e-17
	SMUG1	1373.34	447.601	0.331519	-1.59283	1.50078e-18	1.92278e-17
	FAM136A	1112.22	324.548	0.298502	-1.74419	1.53766e-18	1.96847e-17
	PEG10	6388.32	3088.57	0.485351	-1.0429	1.60403e-18	2.05181e-17
	CARD8	1024.56	259.784	0.260877	-1.93856	1.62286e-18	2.07427e-17
	C6orf52	35.441	349.524	8.55861	3.09738	1.62613e-18	2.0768e-17
	BRD8	4774.94	2263.98	0.47642	-1.06969	1.64563e-18	2.10005e-17
	BCKDK	1480.2	501.086	0.343888	-1.53999	1.74617e-18	2.22661e-17
	MYCBPAP	0.473697	154.826	42.6027	5.41287	1.76574e-18	2.24979e-17
	ZNF70	243.381	978.322	3.89975	1.96338	1.78377e-18	2.27098e-17
	NCKIPSD	956.212	255.172	0.274552	-1.86485	1.83827e-18	2.33853e-17
	KRI1	2117.96	792.862	0.378127	-1.40306	1.85346e-18	2.356e-17
	SERPINB5	0	145.832	48.0342	5.58599	1.92061e-18	2.43945e-17
	APLP2	12597.5	23074.7	1.82642	0.869015	1.94111e-18	2.46355e-17
	CKAP2L	3245.84	1397.64	0.432307	-1.20987	1.97285e-18	2.50188e-17
	KPNA7	0.421563	155.354	42.9226	5.42367	1.9774e-18	2.50568e-17
	TNKS1BP1	3784.85	1724.31	0.458325	-1.12556	1.99054e-18	2.52037e-17
	GTF2I	1487.2	499.04	0.341598	-1.54963	2.02892e-18	2.56504e-17
	KCTD15	979.885	240.68	0.252204	-1.98733	2.02899e-18	2.56504e-17
	HOXC4	412.386	50.0067	0.135452	-2.88414	2.07155e-18	2.6168e-17
	PRPS2	2496.23	977.317	0.395091	-1.33974	2.11443e-18	2.66889e-17
	PDE7A	1517.48	511.236	0.341706	-1.54917	2.12166e-18	2.67593e-17
	UBE2H	3240.46	6504.01	1.99835	0.998811	2.2373e-18	2.81959e-17
	MANEA	1095.46	319.3	0.298331	-1.74502	2.23948e-18	2.82015e-17
	RAVER2	970.611	231.399	0.24474	-2.03068	2.41284e-18	3.03609e-17
	SOX9	2072.77	4401.21	2.11187	1.07852	2.54718e-18	3.20264e-17
	PGS1	2513.71	5207.33	2.06125	1.04352	2.59911e-18	3.26541e-17
	URB1	2932.49	5960.28	2.0239	1.01714	2.64331e-18	3.31836e-17
	SSRP1	11478.7	5970.76	0.521834	-0.938338	2.6847e-18	3.36772e-17
	IQGAP3	7922.06	3753.45	0.47143	-1.08488	2.76141e-18	3.46126e-17
	CCR6	3.89833	187.075	24.3554	4.60617	2.78811e-18	3.49203e-17
	ERLIN2	4270.17	8343.21	1.94515	0.959879	2.90898e-18	3.6406e-17
	OSTM1	5106.49	9966.25	1.94252	0.957931	2.91151e-18	3.64096e-17
	HSPA4	10089.1	19128.5	1.88298	0.913015	3.09885e-18	3.87224e-17
	GS1-259H13.2	141.503	668.81	4.51406	2.17443	3.1014e-18	3.87245e-17
	ECE1	12553.4	23066	1.83065	0.872353	3.2426e-18	4.04564e-17
	C15orf39	2296.05	4809.82	2.08364	1.05911	3.26604e-18	4.07175e-17
	HECTD4	2992.81	6089.64	2.02393	1.01716	3.35988e-18	4.18552e-17
	ZBTB37	103.481	590.894	5.34515	2.41823	3.40505e-18	4.23853e-17
	CHMP6	1482.95	506.924	0.34727	-1.52587	3.47991e-18	4.32839e-17
	NAE1	1941.97	736.24	0.383962	-1.38096	3.48521e-18	4.33166e-17
	CTSB	58336	103578	1.7709	0.824486	3.52262e-18	4.37479e-17
	TRIM55	7.84431	2876.14	51.3651	5.68272	3.58451e-18	4.44825e-17
	PMP22	4510.07	2134.29	0.475734	-1.07177	3.70131e-18	4.58968e-17
	MAGI2-AS3	1333.67	406.482	0.30956	-1.69171	3.76952e-18	4.67069e-17
	SLC26A8	1.31682	158.845	34.3498	5.10223	3.81436e-18	4.72264e-17
	UNC5B-AS1	3.05521	182.401	26.9219	4.75071	3.81837e-18	4.72399e-17
	RAB5C	5510.8	10572.8	1.90937	0.933096	3.89476e-18	4.81483e-17
	CATSPERD	0	142.268	46.8047	5.54858	3.94746e-18	4.87625e-17
	SQSTM1	32368	57561.1	1.77317	0.826332	4.179e-18	5.15835e-17
	STRN4	4906.54	2362.29	0.48369	-1.04784	4.44304e-18	5.48009e-17
	HTT	2243.62	4725.22	2.09292	1.06552	4.5158e-18	5.5656e-17
	CD82	4691.95	9195.7	1.95606	0.96795	4.56208e-18	5.61836e-17
	TRO	1725.4	608.034	0.357228	-1.48508	4.61819e-18	5.68314e-17
	NKPD1	3.10734	174.506	26.1259	4.70741	4.67865e-18	5.75317e-17
	BRPF3	2100.43	802.693	0.385336	-1.37581	4.71906e-18	5.79846e-17
	LINC00622	9.00473	217.347	16.5149	4.04569	4.74023e-18	5.82007e-17
	TRERF1	889.955	227.101	0.262572	-1.92922	4.81324e-18	5.90524e-17
	HLA-B	87122	154033	1.76215	0.817335	4.88417e-18	5.98772e-17
	HS6ST1	2162.18	5403.04	2.42793	1.27972	5.0004e-18	6.12559e-17
	TMEM97	1610.54	570.894	0.359506	-1.47591	5.06951e-18	6.20556e-17
	FADS1	3964.28	1796.66	0.454056	-1.13906	5.15751e-18	6.30851e-17
	ASIC4	1.36896	163.552	34.3742	5.10325	5.22916e-18	6.38775e-17
	DDIT4	550.68	1556.89	2.7857	1.47804	5.23018e-18	6.38775e-17
	LOC150776	1463.35	463.289	0.321905	-1.63529	5.33449e-18	6.51025e-17
	CDK5RAP2	3610.66	1587.65	0.441704	-1.17885	5.53267e-18	6.74703e-17
	MYH10	7122.8	3548.57	0.499399	-1.00174	5.56798e-18	6.78498e-17
	PGBD1	868.15	192.347	0.229735	-2.12196	5.62849e-18	6.85357e-17
	NLRP7	0.421563	150.323	41.2559	5.36653	5.83404e-18	7.09851e-17
	ARL6IP1	9949.9	5217.79	0.526143	-0.926474	6.04881e-18	7.35431e-17
	SLC13A3	2.21208	164.453	29.1521	4.86553	6.4629e-18	7.85189e-17
	ZCCHC6	1282.13	2950.28	2.28556	1.19255	6.4961e-18	7.88631e-17
	CCDC50	3996.87	1857.35	0.467188	-1.09792	6.61043e-18	8.0191e-17
	ASH1L	2969.84	5970.23	2.00046	1.00033	6.62533e-18	8.03117e-17
	CLMP	685.12	147.853	0.225475	-2.14896	7.37999e-18	8.93928e-17
	TPBG	2484.45	985.372	0.398961	-1.32568	7.4159e-18	8.97606e-17
	COQ9	1321.25	410.249	0.315473	-1.66441	7.44683e-18	9.00006e-17
	SRPRB	1993.08	734.944	0.371477	-1.42866	7.44401e-18	9.00006e-17
	MYO9B	4733.72	9073.03	1.90966	0.933315	7.52554e-18	9.08841e-17
	RANBP6	1093.99	318.828	0.298153	-1.74588	7.70358e-18	9.2965e-17
	LAMA5	6320.36	12990.4	2.04186	1.02989	7.79819e-18	9.40366e-17
	BTK	6.89692	217.613	19.5766	4.29106	7.82955e-18	9.43446e-17
	MUC4	1.36896	158.76	33.6966	5.07453	8.39516e-18	1.01085e-16
	COL5A1	19327.9	35651.9	1.84196	0.881239	8.59113e-18	1.03368e-16
	RALGPS2	1010.25	267.593	0.271865	-1.87904	9.08942e-18	1.09282e-16
	PTPRG	2183.5	4653.84	2.11661	1.08176	9.32575e-18	1.1204e-16
	ATAD5	825.726	2146.84	2.56225	1.35741	9.34536e-18	1.12193e-16
	PBDC1	861.514	222.223	0.266239	-1.9092	9.43452e-18	1.13179e-16
	DZIP1L	650.09	134.671	0.217549	-2.20059	9.73275e-18	1.16671e-16
	NFATC4	846.536	189.11	0.228548	-2.12943	9.86217e-18	1.18135e-16
	FAM109B	326.088	28.3259	0.103889	-3.26689	1.0839e-17	1.29739e-16
	MAP7D1	6045.15	2971.55	0.493172	-1.01984	1.11555e-17	1.3343e-16
	MARK1	676.24	138.173	0.215254	-2.21589	1.14968e-17	1.37411e-16
	DNAJB5	312.59	26.6043	0.102659	-3.28407	1.17848e-17	1.40749e-16
	C19orf82	200.203	881.672	4.26525	2.09263	1.20496e-17	1.43806e-16
	FAM129C	1.26469	183.087	35.5016	5.14981	1.24439e-17	1.48402e-16
	PARP1	10776.6	5722	0.532291	-0.909714	1.25477e-17	1.49529e-16
	C17orf62	2514.71	1052.33	0.421887	-1.24507	1.32151e-17	1.5727e-16
	SLC43A3	4479.44	2120.8	0.474699	-1.07492	1.32166e-17	1.5727e-16
	NLRP12	0.421563	145.252	40.071	5.32449	1.37692e-17	1.63725e-16
	TEX10	1567	3470.15	2.19319	1.13303	1.39629e-17	1.65906e-16
	CXXC1	2467.95	1036.71	0.423677	-1.23896	1.41234e-17	1.67691e-16
	SLC4A5	73.8805	526.672	6.47377	2.69461	1.42648e-17	1.69246e-16
	TMEM177	468.712	70.7356	0.164424	-2.60451	1.43105e-17	1.69664e-16
	RECQL4	1846.81	694.693	0.380797	-1.39291	1.45339e-17	1.72187e-16
	EIF3A	9685.98	17770.8	1.82969	0.871598	1.45998e-17	1.72841e-16
	SARS	6146.88	11474.3	1.8602	0.895455	1.47213e-17	1.74152e-16
	ASCL5	3.58104	179.443	24.3389	4.60519	1.49563e-17	1.76803e-16
	PEBP4	0.947394	164.297	36.9284	5.20666	1.50581e-17	1.77877e-16
	FAM83D	2742.18	1179.56	0.433154	-1.20705	1.51983e-17	1.79402e-16
	SPAG9	11517.7	20815.9	1.80244	0.849954	1.59967e-17	1.88689e-16
	TUBB4B	25095.7	13848.2	0.55269	-0.855459	1.64983e-17	1.94463e-16
	MALAT1	34823.9	62988.1	1.79942	0.847536	1.65295e-17	1.94691e-16
	BCRP3	21.1734	276.638	10.547	3.39877	1.66354e-17	1.95795e-16
	CALCOCO1	750.085	1924.54	2.53833	1.34388	1.74723e-17	2.05497e-16
	CREB3L1	2001.04	787.48	0.397198	-1.33207	1.78063e-17	2.09272e-16
	FBXL5	740.819	1924.02	2.56661	1.35986	1.83413e-17	2.15404e-16
	FRYL	1502.5	3356.39	2.21648	1.14827	1.88137e-17	2.20792e-16
	CDC42EP2	500.146	1477.4	2.89368	1.5329	1.90176e-17	2.23023e-16
	ABCC3	944.904	2299.21	2.40981	1.26892	1.90869e-17	2.23674e-16
	ZNF843	9.00473	211.437	16.0135	4.00122	1.9256e-17	2.25493e-16
	MYO7A	3.21161	186.809	26.2084	4.71196	1.9463e-17	2.27752e-16
	RHNO1	1962.15	720.306	0.369553	-1.43615	1.95896e-17	2.29068e-16
	ABCB10	1020.13	297.619	0.298857	-1.74247	1.99433e-17	2.33036e-16
	SHANK3	655.892	1774.82	2.66215	1.41259	2.02124e-17	2.36011e-16
	MRPL19	1737.78	641.622	0.373285	-1.42165	2.06271e-17	2.40679e-16
	SLC3A2	12816.9	25161	1.94528	0.959979	2.12083e-17	2.47283e-16
	ZFX	874.596	2168.74	2.45332	1.29474	2.13566e-17	2.48833e-16
	DST	9133.84	18739.2	2.03229	1.02311	2.15301e-17	2.50674e-16
	PDIA4	10260	18570.9	1.80422	0.851373	2.15666e-17	2.50919e-16
	TNFAIP8L1	712.128	151.667	0.222657	-2.16711	2.16799e-17	2.52056e-16
	IRS2	3810.54	8363.29	2.16824	1.11652	2.20785e-17	2.56506e-16
	PMPCB	2578.79	1087.98	0.425317	-1.23339	2.22368e-17	2.58161e-16
	CNP	4196.98	1954.52	0.468565	-1.09368	2.24683e-17	2.60662e-16
	PPP1R32	46.9796	378.228	7.14781	2.8375	2.36649e-17	2.74347e-16
	CTTN	37642.2	66295.6	1.75742	0.813463	2.41222e-17	2.79449e-16
	KLHL20	954.122	2296.87	2.38546	1.25427	2.4628e-17	2.85104e-16
	NRSN2	1170.71	360.302	0.314156	-1.67045	2.57622e-17	2.98021e-16
	ZNF425	112.556	619.069	5.16884	2.36984	2.64577e-17	3.05849e-16
	TTI1	1536.76	540.79	0.356404	-1.48841	2.68735e-17	3.10434e-16
	HAUS8	974.388	270.607	0.283971	-1.81618	2.69344e-17	3.10915e-16
	ARPC5L	2348.05	4803.6	2.03615	1.02584	2.7119e-17	3.12601e-16
	RRP12	1167.87	2686.89	2.28313	1.19101	2.71104e-17	3.12601e-16
	SCAF4	1747.72	3770.87	2.14311	1.0997	2.78394e-17	3.20678e-16
	GNL1	3776.26	1659.7	0.440213	-1.18373	2.96104e-17	3.40835e-16
	PSMD13	7015.65	13159.6	1.86626	0.900149	3.0301e-17	3.48536e-16
	PRKX	422.458	1269.59	2.95175	1.56157	3.13605e-17	3.60467e-16
	SGOL2	2532.31	1065.99	0.424328	-1.23675	3.19366e-17	3.6683e-16
	ADAM8	48.5049	379.971	6.99788	2.80692	3.25904e-17	3.74074e-16
	PLCG1	6849.05	3524.29	0.516607	-0.95286	3.34687e-17	3.83884e-16
	LHFPL3-AS2	0.473697	142.879	38.7008	5.27429	3.49042e-17	4.00065e-16
	ARFGAP2	2634.76	1138.72	0.435822	-1.19819	3.51115e-17	4.02157e-16
	SREK1	3132.85	1344.3	0.431506	-1.21255	3.67056e-17	4.20118e-16
	ILVBL	2140.79	856.236	0.403692	-1.30867	3.70802e-17	4.23807e-16
	SCRIB	2896.95	5786.64	1.98924	0.992218	3.70618e-17	4.23807e-16
	DNM1P46	80.7954	486.887	5.54831	2.47205	3.84086e-17	4.38681e-16
	MRGPRF	5946.91	2959.41	0.50049	-0.998588	3.90202e-17	4.45352e-16
	ACP2	1426.04	493.744	0.35153	-1.50828	3.93315e-17	4.4859e-16
	UBL3	1378.14	3146.97	2.25765	1.17482	3.98089e-17	4.53715e-16
	EEF2	64981.7	113534	1.74288	0.801474	4.01e-17	4.56711e-16
	ZC3H7A	2452.71	5008.71	2.03146	1.02252	4.48127e-17	5.10028e-16
	NHLH1	9.32202	213.446	15.5259	3.9566	4.63939e-17	5.27653e-16
	LOXL4	20.4301	285.412	11.1423	3.47797	4.68223e-17	5.32153e-16
	WDR63	6.26682	187.914	18.3643	4.19883	4.81452e-17	5.46804e-16
	SOGA3	618.49	127.508	0.217006	-2.20419	4.86946e-17	5.52656e-16
	CNOT10	1449.29	505.479	0.355136	-1.49356	4.94429e-17	5.60756e-16
	SASS6	622.658	130.289	0.219973	-2.1846	5.43252e-17	6.15699e-16
	CCDC147	35.8149	331.327	8.00564	3.00102	5.46213e-17	6.18622e-16
	PACSIN3	673.818	146.336	0.227699	-2.1348	5.66509e-17	6.4116e-16
	CASP2	1541.05	519.506	0.34296	-1.54389	5.69128e-17	6.43674e-16
	LOC101926889	0	130.023	42.3217	5.40333	5.80167e-17	6.55702e-16
	HLA-C	32594.7	57727.3	1.76611	0.820579	6.02224e-17	6.80157e-16
	CYHR1	699.377	1820.59	2.56874	1.36106	6.108e-17	6.89361e-16
	ATP6V1H	3047.85	6062.38	1.97886	0.984671	6.26751e-17	7.06872e-16
	SMARCA2	1333.85	454.499	0.346652	-1.52844	6.54929e-17	7.38138e-16
	PRELP	6.68838	191.046	17.7494	4.1497	6.65246e-17	7.49245e-16
	RPL28	14475.1	25645.2	1.76607	0.820544	6.73759e-17	7.58306e-16
	ARAP3	2700.93	1142.59	0.426598	-1.22905	6.94156e-17	7.79639e-16
	C15orf38	1329.72	428.525	0.326036	-1.6169	6.93657e-17	7.79639e-16
	HNRNPAB	14082.3	7272.14	0.516501	-0.953156	6.93796e-17	7.79639e-16
	C1orf68	0	130.026	41.9658	5.39114	7.08066e-17	7.94161e-16
	NUDT21	4879.54	2413.52	0.496956	-1.00881	7.08054e-17	7.94161e-16
	NARFL	825.873	216.902	0.271269	-1.8822	7.0925e-17	7.94938e-16
	PPP4R1	4008.76	1917.34	0.480916	-1.05614	7.16184e-17	8.02156e-16
	ANKDD1A	201.343	785.176	3.76519	1.91272	7.3248e-17	8.19841e-16
	TNFAIP3	2469.78	5006.82	2.01148	1.00826	7.47538e-17	8.36117e-16
	ASH2L	3006.48	1328.82	0.445158	-1.16761	7.74935e-17	8.66163e-16
	PHPT1	2554.66	6052.86	2.33275	1.22203	7.76345e-17	8.67142e-16
	BRD3	1719.51	654.078	0.385165	-1.37645	7.87198e-17	8.78658e-16
	REPIN1	2516.73	1085.36	0.434434	-1.20279	8.01693e-17	8.94221e-16
	ACBD3	1570.06	3383.54	2.13997	1.09759	8.05355e-17	8.97689e-16
	C19orf38	2.68578	158.711	25.4244	4.66814	8.08112e-17	9.00142e-16
	ATP6AP2	3970.93	7729.24	1.93568	0.952842	8.3078e-17	9.24756e-16
	LMO4	1452.54	517.495	0.361995	-1.46596	8.37156e-17	9.31214e-16
	ISYNA1	147.727	658.451	4.25251	2.08831	8.48823e-17	9.43544e-16
	SPSB4	242.06	13.8318	0.0774196	-3.69116	8.53291e-17	9.47861e-16
	ZEB2	2116.46	853.735	0.406406	-1.29901	8.56788e-17	9.51094e-16
	H6PD	2330.84	5057.46	2.14812	1.10308	8.65846e-17	9.6049e-16
	PML	1874.24	3936.46	2.08878	1.06266	8.71439e-17	9.66034e-16
	KATNAL1	2124.21	816.045	0.386718	-1.37065	8.886e-17	9.83919e-16
	TTF2	2120.05	857.934	0.40836	-1.29209	8.88788e-17	9.83919e-16
	SH3D19	1119.73	316.111	0.288455	-1.79358	9.15691e-17	1.01295e-15
	UBL4B	0.843126	146.505	34.3751	5.10329	9.16259e-17	1.01295e-15
	CCNG2	648.299	1739.28	2.64178	1.40151	9.65924e-17	1.06713e-15
	TSPAN9	2823.14	5694.01	2.0057	1.00411	9.70601e-17	1.07156e-15
	TADA1	523.806	91.6468	0.187228	-2.41713	9.92844e-17	1.09537e-15
	NCAPG2	5225.39	2562.02	0.491248	-1.02548	9.95237e-17	1.09727e-15
	CYB5R3	9124.89	16383.4	1.79042	0.840295	1.00394e-16	1.10611e-15
	PELP1	2320.43	959.548	0.416843	-1.26242	1.00759e-16	1.10938e-15
	C1S	2976.74	5860.27	1.95731	0.968871	1.01536e-16	1.11718e-15
	LOC338694	0.947394	153.691	34.4323	5.10569	1.03764e-16	1.14091e-15
	MAD2L2	2710.68	1193.17	0.443367	-1.17343	1.12765e-16	1.23904e-15
	ATP6V1B2	10454.9	18660.3	1.77963	0.831576	1.14232e-16	1.2543e-15
	C3	4310.26	8139.05	1.87931	0.910203	1.14331e-16	1.25454e-15
	ARF1	12556.9	23130.3	1.82961	0.871533	1.19644e-16	1.31196e-15
	CD47	4403.45	2135.5	0.487273	-1.0372	1.23932e-16	1.35806e-15
	AMZ1	61.0952	418.613	6.22836	2.63885	1.27604e-16	1.39735e-15
	SLC26A4	17.9052	260.857	11.2929	3.49734	1.32495e-16	1.44993e-15
	LOC574538	0.89526	137.62	33.1681	5.05173	1.39338e-16	1.52379e-15
	CDC7	806.601	180.623	0.230543	-2.11689	1.40632e-16	1.5369e-15
	CENPI	712.345	162.72	0.237761	-2.07241	1.45906e-16	1.59346e-15
	TEX15	378.969	31.9139	0.101235	-3.30422	1.5115e-16	1.64963e-15
	GBAS	1586.75	512.65	0.324242	-1.62486	1.51263e-16	1.64975e-15
	TIMP2	26463.2	45840.8	1.72769	0.788846	1.54191e-16	1.68055e-15
	FANCL	1151.45	358.988	0.31922	-1.64738	1.71101e-16	1.8636e-15
	SNX24	1097.49	345.435	0.32116	-1.63864	1.74183e-16	1.8959e-15
	SMAD7	1414.67	3164.19	2.22407	1.1532	1.76167e-16	1.9162e-15
	TCHP	1662.74	619.804	0.377712	-1.40464	1.79779e-16	1.95417e-15
	RIOK3	1807.71	3768.95	2.07378	1.05227	1.86097e-16	2.0215e-15
	PDLIM1	3445.44	6636.06	1.92034	0.941364	1.88825e-16	2.04975e-15
	ZNF767P	688.833	1778.15	2.54496	1.34764	1.89934e-16	2.06042e-15
	FANCI	5557.35	2674.17	0.479563	-1.06021	1.94034e-16	2.10349e-15
	RRP36	2701.5	1197.08	0.446584	-1.163	1.94676e-16	2.10903e-15
	LINC00184	2.15995	151.117	26.3837	4.72157	1.9848e-16	2.14881e-15
	C16orf72	1615.57	3457.81	2.12512	1.08754	2.04574e-16	2.21331e-15
	CYP2B7P	13.5377	233.577	12.7159	3.66857	2.05761e-16	2.22467e-15
	ELF4	1839.64	728.68	0.400918	-1.31862	2.07247e-16	2.23923e-15
	TRIB1	272.286	930.018	3.32811	1.73471	2.13713e-16	2.30756e-15
	PDCD2L	348.521	40.9536	0.13431	-2.89636	2.32252e-16	2.50606e-15
	AMZ2P1	369.665	1150.96	3.05234	1.60992	2.38234e-16	2.5689e-15
	STX2	1560.71	583.101	0.378903	-1.4001	2.3863e-16	2.57146e-15
	SFXN4	574.253	114.832	0.211494	-2.24131	2.39727e-16	2.58156e-15
	L3MBTL3	840.549	219.034	0.269388	-1.89225	2.54788e-16	2.74193e-15
	KIAA0895L	1042.13	322.995	0.316891	-1.65794	2.55941e-16	2.75251e-15
	ACSL6	1.84265	873.927	44.0708	5.46175	2.58916e-16	2.78266e-15
	FGF5	715.731	162.321	0.237153	-2.07611	2.59608e-16	2.7864e-15
	TSPAN17	2556.88	1124.84	0.44342	-1.17326	2.59607e-16	2.7864e-15
	POM121L9P	0.473697	130.796	35.588	5.15332	2.75988e-16	2.96025e-15
	CLIC5	232.767	842.879	3.50991	1.81143	2.84653e-16	3.05118e-15
	GMNN	2060.21	841.925	0.41189	-1.27967	2.91374e-16	3.12115e-15
	ZGRF1	1282.88	436.709	0.345498	-1.53325	3.04444e-16	3.259e-15
	APP	22718.5	39290	1.72549	0.787002	3.14451e-16	3.3639e-15
	C17orf85	2743.26	1234.59	0.453264	-1.14158	3.3811e-16	3.61461e-15
	PLA2G4C	183.868	729.646	3.82917	1.93703	3.38589e-16	3.61734e-15
	DKK3	21792.1	38658.5	1.76547	0.820053	3.47415e-16	3.7092e-15
	LOC283693	33.5462	321.059	8.15908	3.02841	3.55868e-16	3.79694e-15
	ARHGAP9	926.217	2182.15	2.33498	1.22341	3.83844e-16	4.09274e-15
	C4orf46	1076.59	343.099	0.325387	-1.61977	3.84916e-16	4.10147e-15
	PRR12	1640.19	621.239	0.384397	-1.37933	3.87241e-16	4.12353e-15
	CLTC	31402.3	53829.1	1.71033	0.774278	3.92432e-16	4.17606e-15
	RRBP1	6769.69	12324.1	1.81222	0.857756	4.03035e-16	4.28608e-15
	CTDSPL	2116.7	888.711	0.423714	-1.23884	4.23421e-16	4.49993e-15
	LOC101929505	0.843126	136.548	32.284	5.01275	4.26676e-16	4.53154e-15
	NXPE3	1101.62	355.906	0.329851	-1.60011	4.34901e-16	4.61588e-15
	LRRC4C	36.3362	325.307	7.75496	2.95512	4.35899e-16	4.62344e-15
	ECI2	2022.85	813.848	0.407371	-1.29558	4.3791e-16	4.64173e-15
	PLK4	1615.9	469.902	0.2941	-1.76562	4.59341e-16	4.86571e-15
	AMZ2	2409.41	4893.93	2.01512	1.01087	4.60303e-16	4.87272e-15
	VTCN1	0	120.911	38.9058	5.28191	4.88336e-16	5.1661e-15
	ZNF768	1971.72	811.647	0.415647	-1.26657	5.10422e-16	5.39623e-15
	IDI2-AS1	14.8545	239.86	12.0668	3.59297	5.11404e-16	5.40308e-15
	HMCN1	351.256	1085.5	3.02225	1.59562	5.29159e-16	5.58702e-15
	HPS1	2904.37	5734.95	1.96237	0.972599	5.43566e-16	5.7354e-15
	FAM43A	1483.9	3458.11	2.28905	1.19475	5.4974e-16	5.79677e-15
	CNOT6	2490.76	4910.81	1.96244	0.97265	5.61664e-16	5.91866e-15
	DHX57	1036.56	324.834	0.320217	-1.64288	5.68474e-16	5.98652e-15
	POLA1	2264.25	892.572	0.395834	-1.33703	5.71796e-16	6.0176e-15
	PRR26	96.2278	508.472	4.92085	2.29891	5.75549e-16	6.05317e-15
	IRF2BPL	1008.91	311.174	0.316385	-1.66025	5.80363e-16	6.09983e-15
	POLD1	2933.5	1315.82	0.450478	-1.15047	5.83409e-16	6.12788e-15
	DNAJC16	715.231	1783.44	2.46604	1.3022	5.88475e-16	6.17708e-15
	DMBX1	655.579	139.608	0.22276	-2.16644	5.93658e-16	6.22745e-15
	VPS54	1288.04	450.562	0.355803	-1.49085	5.97782e-16	6.26666e-15
	PTPN14	3548.66	6787.58	1.90639	0.930843	6.17655e-16	6.47081e-15
	PANDAR	0	119.949	38.5178	5.26745	6.24308e-16	6.53627e-15
	FAM98B	2196.89	911.569	0.418203	-1.25773	6.60575e-16	6.91152e-15
	SSH1	2713.24	6042.01	2.19731	1.13574	6.6103e-16	6.91182e-15
	ARHGEF37	85.8317	491.623	5.34938	2.41937	6.62776e-16	6.9256e-15
	DNAJB9	449.285	1277.78	2.79315	1.48189	6.97079e-16	7.27936e-15
	PRKD1	1040.5	314.256	0.30969	-1.6911	7.01425e-16	7.32002e-15
	FAM92B	6.26682	178.84	17.2392	4.10762	7.03759e-16	7.33965e-15
	NEXN-AS1	37.3357	327.353	7.622	2.93017	7.04843e-16	7.34624e-15
	LOC100131564	267.222	908.675	3.30703	1.72554	7.21981e-16	7.52002e-15
	SEC24A	1912.55	3943.74	2.05247	1.03736	7.24645e-16	7.54292e-15
	RAB29	1417.78	519.758	0.372272	-1.42557	7.38265e-16	7.67976e-15
	BCL2L1	2131	4276.62	1.99713	0.997927	7.46612e-16	7.76161e-15
	UBTD1	438.326	1302.97	2.90588	1.53898	7.60877e-16	7.90483e-15
	FANCC	997.038	308.68	0.316919	-1.65782	7.69517e-16	7.98946e-15
	MDM1	734.144	178.791	0.252684	-1.98459	8.03089e-16	8.33269e-15
	DYNC1H1	20073.3	35887.7	1.77713	0.82955	8.39909e-16	8.70915e-15
	FNDC3A	2673.61	1088.37	0.410674	-1.28393	8.55958e-16	8.86989e-15
	ADCK2	653.111	145.829	0.234364	-2.09318	8.65543e-16	8.96349e-15
	C12orf43	705.988	166.257	0.245941	-2.02361	8.7122e-16	9.01652e-15
	ZNF618	2370.52	947.009	0.400971	-1.31843	8.73034e-16	9.02952e-15
	FZD8	1092.97	357.328	0.33368	-1.58346	9.0592e-16	9.36367e-15
	PNPT1	2146	876.378	0.411557	-1.28083	9.12834e-16	9.42913e-15
	VSIG10	768.187	189.394	0.256346	-1.96383	9.17631e-16	9.47264e-15
	CDC27	5530	2715.25	0.492892	-1.02066	9.26141e-16	9.5544e-15
	EIF3B	8436.92	15696.2	1.84698	0.885169	9.28265e-16	9.57022e-15
	EP400NL	121.386	609.386	4.70703	2.23482	9.30816e-16	9.59042e-15
	RHOA	19570.8	33610.8	1.71326	0.77674	9.49267e-16	9.77432e-15
	HCFC1	4153.93	1944.14	0.469066	-1.09214	9.55581e-16	9.83308e-15
	SMOX	618.348	1638.72	2.61321	1.38582	9.76274e-16	1.00396e-14
	MID1IP1	1125.74	367.92	0.334259	-1.58096	9.98701e-16	1.02638e-14
	SPARC	63230.7	106756	1.68452	0.752335	1.0033e-15	1.03045e-14
	GPRIN1	1341.76	484.101	0.366529	-1.448	1.03456e-15	1.06188e-14
	TUBG1	3735.33	1718.71	0.463626	-1.10897	1.03586e-15	1.06254e-14
	PXDNL	1.73839	139.162	26.5824	4.7324	1.03732e-15	1.06336e-14
	SMPD4	3053.08	1425.31	0.470118	-1.08891	1.04324e-15	1.06876e-14
	TRIT1	775.988	197.882	0.26489	-1.91654	1.06806e-15	1.0935e-14
	NBEAP1	2.26422	153.38	25.3751	4.66534	1.06881e-15	1.09357e-14
	LGALSL	387.28	55.0991	0.157708	-2.66467	1.07802e-15	1.1023e-14
	BBX	2750.89	1242.07	0.455283	-1.13516	1.08519e-15	1.10894e-14
	NIPBL	2861.73	5524.69	1.92177	0.942437	1.10152e-15	1.12491e-14
	EFNB2	3096.81	1449.17	0.470873	-1.08659	1.12297e-15	1.14609e-14
	CTSL	10039.8	17857.3	1.77055	0.824198	1.19244e-15	1.21623e-14
	MAPRE2	1947.12	809.716	0.4202	-1.25085	1.23847e-15	1.26238e-14
	APOE	85.215	471.548	5.12816	2.35844	1.25045e-15	1.2738e-14
	F11R	1127.86	2521.55	2.21738	1.14886	1.30914e-15	1.33274e-14
	ZNF324	320.439	1122.74	3.41351	1.77125	1.31071e-15	1.3335e-14
	H2AFZ	11828.9	5734.38	0.487754	-1.03578	1.31978e-15	1.34189e-14
	JAZF1	1020.51	322.802	0.323548	-1.62795	1.3388e-15	1.36037e-14
	CCDC71L	1288.84	438.237	0.345547	-1.53305	1.34623e-15	1.36707e-14
	CMTM3	1473.78	543.555	0.374256	-1.4179	1.35333e-15	1.37341e-14
	SLC11A2	1374.41	460.516	0.342518	-1.54575	1.37208e-15	1.39157e-14
	KCTD5	1768.98	4045.86	2.24472	1.16653	1.38311e-15	1.40188e-14
	ZNF808	136.866	632.268	4.38581	2.13284	1.39119e-15	1.40918e-14
	PLAC8	918.314	2136.23	2.30442	1.2044	1.42323e-15	1.44074e-14
	PANK3	1899.75	3944.29	2.06448	1.04578	1.44564e-15	1.46251e-14
	TCF3	2590.53	1165.55	0.453093	-1.14212	1.45274e-15	1.46878e-14
	ADRM1	5670.77	10763.2	1.88193	0.912213	1.50523e-15	1.52091e-14
	C19orf45	2.15995	157.504	25.7119	4.68437	1.51144e-15	1.52622e-14
	FLJ32255	162.695	700.604	4.12373	2.04395	1.51373e-15	1.52759e-14
	BRIX1	2237.95	930.67	0.41756	-1.25994	1.53719e-15	1.55029e-14
	KCTD12	585.756	116.578	0.211379	-2.2421	1.58638e-15	1.59791e-14
	VEZF1	3964.08	1857.35	0.468832	-1.09286	1.58591e-15	1.59791e-14
	KDM5A	3694.58	6953.97	1.87477	0.906715	1.6048e-15	1.61546e-14
	NUDT22	1131.86	344.089	0.309031	-1.69418	1.62096e-15	1.63072e-14
	VCP	10904.9	19203.8	1.75504	0.811505	1.6274e-15	1.63618e-14
	EAF1	1120.46	2762.89	2.42614	1.27866	1.63639e-15	1.6442e-14
	JAKMIP2	223.45	13.3142	0.0815179	-3.61674	1.64002e-15	1.64581e-14
	NUP107	3448.7	1641.65	0.47862	-1.06305	1.63921e-15	1.64581e-14
	CAB39	3696.98	6937.12	1.8699	0.902964	1.66377e-15	1.66758e-14
	EFCAB12	5.84525	174.482	17.4832	4.12789	1.66302e-15	1.66758e-14
	HSPG2	5538.31	10531.1	1.88783	0.916727	1.66611e-15	1.66889e-14
	C3orf18	562.706	116.975	0.219911	-2.18501	1.67422e-15	1.67598e-14
	FERMT2	3017.23	1405.26	0.468211	-1.09477	1.69409e-15	1.69482e-14
	TSPEAR	0.843126	133.469	30.8186	4.94573	1.7076e-15	1.70729e-14
	BAZ1B	6226.8	3284.91	0.529799	-0.916483	1.72808e-15	1.7267e-14
	CKM	0.421563	122.054	33.2621	5.05581	1.77348e-15	1.77097e-14
	MTTP	6.90141	203.443	17.322	4.11454	1.79255e-15	1.78891e-14
	EXOSC9	2829.55	1274.18	0.452909	-1.14271	1.83704e-15	1.83218e-14
	NFIC	2608.72	1140.12	0.440386	-1.18316	1.87402e-15	1.86791e-14
	CERS5	1516.53	3340.87	2.18025	1.1245	1.89582e-15	1.88848e-14
	CLDN12	1560.39	590.714	0.382109	-1.38794	1.91683e-15	1.90823e-14
	TLR9	5.89739	187.22	18.0446	4.17349	1.92921e-15	1.91938e-14
	SCML2	665.352	159.626	0.250315	-1.99818	1.93457e-15	1.92353e-14
	SHMT1	1272.22	442.126	0.352802	-1.50307	1.9896e-15	1.97704e-14
	MRPS9	1005.97	319.31	0.324773	-1.6225	2.00222e-15	1.98836e-14
	PPARD	2774.87	5490.17	1.96443	0.974112	2.05603e-15	2.04054e-14
	ADAMTS7	401.112	1169.44	2.86611	1.51909	2.23808e-15	2.21986e-14
	ZSWIM8	3333.59	6271.04	1.87421	0.906281	2.32042e-15	2.30012e-14
	MAST2	4833.47	2426.06	0.50317	-0.990883	2.36738e-15	2.34525e-14
	JTB	2440.18	1076.05	0.444051	-1.1712	2.40149e-15	2.37758e-14
	TSEN2	381.177	52.2217	0.153235	-2.70618	2.41441e-15	2.38891e-14
	XYLT1	3177.68	6028.54	1.88951	0.918014	2.42935e-15	2.40222e-14
	ISLR2	30.126	288.424	8.07703	3.01383	2.44252e-15	2.41378e-14
	ANKRD13D	1519.93	567.36	0.376991	-1.4074	2.47363e-15	2.44303e-14
	B2M	75230.4	127783	1.69171	0.758485	2.53404e-15	2.50117e-14
	EVPLL	0	114.231	36.2444	5.17969	2.69799e-15	2.66137e-14
	RPS12	8773.49	16063.1	1.82193	0.865471	2.72097e-15	2.6824e-14
	SMG9	2097.87	843.692	0.407721	-1.29435	2.74229e-15	2.70178e-14
	TAF9B	958.494	289.073	0.308688	-1.69578	2.75762e-15	2.71524e-14
	VAV1	3.63317	167.381	21.4241	4.42116	2.80666e-15	2.76184e-14
	DRAP1	9058.12	15822.1	1.742	0.800747	2.84415e-15	2.79703e-14
	PTPLAD1	4383.82	2105.3	0.482638	-1.05099	2.91089e-15	2.86093e-14
	LRRC8B	656.608	160.516	0.254984	-1.97152	2.92496e-15	2.87302e-14
	METTL21B	2604.92	1188.58	0.459786	-1.12096	2.99355e-15	2.93861e-14
	CASC5	3248.63	1505.36	0.464653	-1.10578	3.00584e-15	2.94889e-14
	LRRC20	4720.19	2393.64	0.509167	-0.97379	3.06943e-15	3.00945e-14
	ANO2	51.4559	361.709	6.30123	2.65563	3.08137e-15	3.01933e-14
	HSPA9	16257.2	28521.1	1.74529	0.803467	3.22092e-15	3.15417e-14
	ZBTB1	1285.55	2789.18	2.15542	1.10797	3.32027e-15	3.24949e-14
	PNMA2	1136.16	379.105	0.340214	-1.55549	3.3585e-15	3.28492e-14
	AGRN	10831.9	18769	1.72857	0.789582	3.41046e-15	3.33374e-14
	BAHD1	1900.73	4147.21	2.1569	1.10896	3.42288e-15	3.34385e-14
	PDGFRA	400.39	50.6932	0.143215	-2.80374	3.42643e-15	3.34531e-14
	AP3B2	35.7061	313.355	7.52926	2.91251	3.58663e-15	3.49878e-14
	BSG	14598.1	25383	1.73176	0.792239	3.58793e-15	3.49878e-14
	CCDC8	834.327	217.876	0.269935	-1.88932	3.61788e-15	3.52586e-14
	USP36	2608.26	5128.4	1.96091	0.971523	3.62239e-15	3.52813e-14
	PIKFYVE	1872.23	3773.69	2.00514	1.0037	3.6315e-15	3.53488e-14
	COL6A1	9467.47	16609.7	1.74672	0.804647	3.71145e-15	3.61054e-14
	SMO	1279.78	455.292	0.362617	-1.46348	3.77701e-15	3.6721e-14
	LDOC1L	2224.33	958.272	0.436434	-1.19617	3.78573e-15	3.67838e-14
	ZNF77	232.525	809.711	3.37877	1.7565	3.82665e-15	3.71591e-14
	PLXNB1	511.227	1440.64	2.78079	1.47549	3.88192e-15	3.76732e-14
	BAIAP2L2	11.9035	203.349	12.2841	3.61872	3.89678e-15	3.77948e-14
	EPB41L3	4769.4	2417.72	0.508189	-0.976562	4.0136e-15	3.89046e-14
	CBR3	440.404	75.2863	0.185933	-2.42714	4.05311e-15	3.92641e-14
	CEP41	1052.38	319.386	0.309704	-1.69104	4.08931e-15	3.9591e-14
	RBMX	5394.99	2812.29	0.523633	-0.933371	4.13607e-15	4.00199e-14
	NRXN2	148.656	665.18	4.27074	2.09448	4.17132e-15	4.03368e-14
	ADD2	764.488	202.121	0.272945	-1.87332	4.17739e-15	4.03715e-14
	OSMR	4573.92	8312.2	1.81104	0.856821	4.19428e-15	4.05106e-14
	KBTBD8	181.851	719.259	3.78838	1.92158	4.27249e-15	4.12413e-14
	RPL11	24786.8	42058.1	1.69156	0.758353	4.29364e-15	4.14209e-14
	CXCL8	16431.2	28367.2	1.72753	0.78871	4.38579e-15	4.22846e-14
	IGF2BP3	3849.46	1911.4	0.499397	-1.00174	4.53582e-15	4.37051e-14
	ATP6V0C	5402.01	10445.5	1.9115	0.934707	4.6095e-15	4.43887e-14
	WHAMM	461.167	1269.2	2.71003	1.43831	4.65291e-15	4.47801e-14
	RPLP2	12924	22401.2	1.72775	0.788897	4.76734e-15	4.58542e-14
	MCM8	2444.86	921.947	0.379251	-1.39877	4.77055e-15	4.58578e-14
	PITRM1	5012.42	9161.86	1.8199	0.863863	4.89164e-15	4.6994e-14
	C17orf103	235.276	908.836	3.73255	1.90016	4.96686e-15	4.76883e-14
	NUP88	2605.24	1155.43	0.447023	-1.16158	5.03262e-15	4.82911e-14
	DNAH3	3.8462	155.019	19.6746	4.29826	5.0404e-15	4.83371e-14
	GNG7	44.8241	339.742	6.70388	2.745	5.05649e-15	4.84628e-14
	ITGB2	6498.81	11562.5	1.77326	0.826401	5.08539e-15	4.87109e-14
	TM4SF1	3594.3	1682.39	0.470775	-1.08689	5.15538e-15	4.93522e-14
	ITGAL	8.74406	190.419	14.3162	3.83958	5.18127e-15	4.95708e-14
	SOCS4	1498.57	3117.65	2.06775	1.04806	5.20714e-15	4.97888e-14
	MSN	18449.6	31492.7	1.70142	0.76674	5.39838e-15	5.1587e-14
	TRIM7	564.093	124.655	0.232819	-2.10272	5.43392e-15	5.1896e-14
	ZDHHC5	4516.85	8339.25	1.83752	0.87776	5.46117e-15	5.21256e-14
	C1orf167	3.95047	151.621	19.3736	4.27602	5.49539e-15	5.23905e-14
	YRDC	1037.7	2542.58	2.40451	1.26575	5.49454e-15	5.23905e-14
	EDIL3	6625.5	11772.3	1.76941	0.823271	5.5574e-15	5.29505e-14
	CAPN3	24.4372	266.046	8.85579	3.14662	5.61115e-15	5.34312e-14
	GRIP2	1039.95	2325.35	2.21481	1.14718	5.61798e-15	5.34648e-14
	CAHM	28.0182	274.023	8.20403	3.03633	5.76608e-15	5.4842e-14
	MTERFD3	365.456	49.2961	0.152629	-2.7119	5.78568e-15	5.49962e-14
	STOM	2982.61	5650.37	1.8881	0.916937	5.79374e-15	5.50083e-14
	UBIAD1	750.472	191.416	0.264319	-1.91965	5.79301e-15	5.50083e-14
	USP7	5352.21	9599.74	1.78917	0.83929	5.80531e-15	5.50859e-14
	STX16	3595.08	6706.22	1.85683	0.892844	5.84995e-15	5.5477e-14
	KIAA1549L	1704.95	625.492	0.371462	-1.42871	5.88596e-15	5.57858e-14
	C6orf136	342.664	44.5416	0.147003	-2.76608	5.89333e-15	5.5823e-14
	PADI1	143.289	628.487	4.18328	2.06464	5.90002e-15	5.58538e-14
	FKBP5	922.11	286.302	0.31827	-1.65168	5.90697e-15	5.58869e-14
	SNIP1	818.16	1967.6	2.3795	1.25066	6.01981e-15	5.69213e-14
	AADAT	575.366	129.53	0.236894	-2.07769	6.06014e-15	5.72692e-14
	MIR22HG	1672.99	3418.41	2.03005	1.02152	6.16097e-15	5.81881e-14
	TUG1	8170.59	14285.1	1.74318	0.801722	6.29923e-15	5.94593e-14
	NSUN4	882.88	260.326	0.302273	-1.72608	6.44422e-15	6.07925e-14
	PRC1-AS1	11.1125	197.761	12.5804	3.6531	6.55371e-15	6.17894e-14
	SPEN	4704.82	8492.12	1.79926	0.847404	6.70511e-15	6.31801e-14
	CYP7A1	0	110.174	34.8179	5.12176	6.95949e-15	6.55379e-14
	TSFM	15294.8	8232.31	0.54003	-0.888889	6.96342e-15	6.55379e-14
	FAM87A	0.843126	127.401	29.2384	4.86979	7.05867e-15	6.63958e-14
	MTMR6	2833.88	1323.24	0.470982	-1.08626	7.33042e-15	6.89119e-14
	UBA52	12422.8	21712.5	1.73775	0.797219	7.40272e-15	6.95512e-14
	ANKRD32	645.856	157.338	0.254489	-1.97433	7.45736e-15	7.0024e-14
	SEH1L	1264.53	407.353	0.327036	-1.61248	7.53266e-15	7.06901e-14
	CES4A	0.473697	116.916	31.2009	4.96351	7.93326e-15	7.43864e-14
	ERCC3	2883.52	1366.85	0.47668	-1.06891	7.93571e-15	7.43864e-14
	INSIG2	619.512	136.306	0.231837	-2.10882	7.94864e-15	7.44645e-14
	FAM107B	2095.09	4356.56	2.06417	1.04556	8.166e-15	7.64566e-14
	MKS1	643.424	159.674	0.258735	-1.95045	8.22351e-15	7.69505e-14
	RAB15	1193.54	396.069	0.336731	-1.57033	8.54248e-15	7.98892e-14
	POU2F2	483.685	1300.24	2.64678	1.40424	8.73036e-15	8.15992e-14
	TXNRD1	12519.4	22489.2	1.78241	0.833832	8.88961e-15	8.30397e-14
	CIRBP	6283.11	3384.13	0.540666	-0.887189	8.94311e-15	8.34913e-14
	XPO7	4840.25	2522.48	0.523495	-0.933753	9.18031e-15	8.56565e-14
	GYG2	644.1	155.051	0.252247	-1.98709	9.20482e-15	8.58358e-14
	TBL1XR1	1710.81	635.883	0.373626	-1.42034	9.23523e-15	8.60698e-14
	DAB2IP	2339.06	972.096	0.417706	-1.25944	9.47376e-15	8.82421e-14
	TMEM39B	839.953	225.306	0.277668	-1.84857	9.52898e-15	8.87054e-14
	ZNF48	387.521	52.7393	0.153808	-2.7008	9.60119e-15	8.93264e-14
	N4BP3	1021.03	338.548	0.338717	-1.56185	9.99988e-15	9.29823e-14
	FAM163B	1.36896	129.64	26.413	4.72317	1.0016e-14	9.30783e-14
	LIPH	45.9189	339.125	6.56188	2.71411	1.00359e-14	9.32103e-14
	CD6	20.5955	249.875	9.62681	3.26706	1.03008e-14	9.56155e-14
	SIX4	545.501	118.13	0.22866	-2.12873	1.06082e-14	9.84125e-14
	TMPRSS9	0.421563	116.819	31.0806	4.95794	1.06769e-14	9.89931e-14
	KCNK4	6.31895	165.246	15.8551	3.98687	1.1017e-14	1.02088e-13
	SLC38A1	3226.53	1377.09	0.427435	-1.22622	1.10251e-14	1.02105e-13
	EIF3H	5723.7	10148.3	1.76696	0.821267	1.10701e-14	1.02464e-13
	RPL3	21674.9	36747.8	1.68864	0.755863	1.12536e-14	1.04102e-13
	NSUN5	963.174	310.402	0.329759	-1.60051	1.1284e-14	1.04324e-13
	TSKU	806.765	1887.52	2.3166	1.21201	1.14623e-14	1.05912e-13
	FANCF	401.738	59.6016	0.163752	-2.61042	1.15162e-14	1.0635e-13
	NAB1	1862.96	789.472	0.427875	-1.22474	1.15606e-14	1.06699e-13
	DVL2	1998.89	867.322	0.437888	-1.19137	1.17294e-14	1.08195e-13
	NEFL	186.892	696.485	3.60035	1.84814	1.17801e-14	1.086e-13
	SLC8A1	329.426	42.0128	0.14582	-2.77774	1.17937e-14	1.08664e-13
	MED13	3814.05	7130.18	1.85879	0.894364	1.20162e-14	1.10652e-13
	AIM1	1082.29	357.762	0.337031	-1.56905	1.22963e-14	1.13167e-13
	DMAP1	1294.55	468.706	0.367247	-1.44518	1.24975e-14	1.14953e-13
	LIMD1	1625.73	641.166	0.397676	-1.33033	1.28343e-14	1.17983e-13
	RPS18	18610.7	31400.3	1.68255	0.750646	1.32838e-14	1.22046e-13
	SAMD14	69.9956	406.734	5.3327	2.41487	1.34766e-14	1.23748e-13
	SARDH	1266.81	2807.8	2.19449	1.13389	1.35047e-14	1.23936e-13
	LINC01089	97.0575	489.062	4.71374	2.23687	1.38757e-14	1.27227e-13
	LOC100506175	0	107.442	33.7887	5.07847	1.3879e-14	1.27227e-13
	BSDC1	1935.63	3830.69	1.9689	0.977392	1.45636e-14	1.33427e-13
	PPM1E	577.587	1478.42	2.5197	1.33325	1.47426e-14	1.3499e-13
	STON2	51.2518	381.162	6.59956	2.72237	1.48699e-14	1.36079e-13
	SEC31A	4542.83	8161.64	1.79081	0.84061	1.48972e-14	1.36253e-13
	LRRC8C	1988.76	825.411	0.418064	-1.2582	1.49504e-14	1.36661e-13
	RBM10	3444.24	1695.56	0.495888	-1.01191	1.53313e-14	1.40064e-13
	KIF7	1154.68	396.321	0.34863	-1.52023	1.5347e-14	1.40129e-13
	RPL19	20263.2	34364.1	1.69057	0.757511	1.53599e-14	1.40168e-13
	C4orf27	682.754	174.058	0.265368	-1.91393	1.54618e-14	1.41018e-13
	UTP3	1631.62	3367.96	2.04667	1.03328	1.55935e-14	1.42139e-13
	CHD1L	2378.12	1054.41	0.445949	-1.16505	1.56985e-14	1.43016e-13
	DKFZp434J0226	2.52938	154.643	22.9407	4.51984	1.58236e-14	1.44075e-13
	PFAS	2486.62	1139.58	0.461238	-1.11642	1.59472e-14	1.45119e-13
	RPS5	20317.5	35089.1	1.71827	0.780961	1.61028e-14	1.46452e-13
	WDR87	0	107.117	33.5542	5.06842	1.61724e-14	1.47003e-13
	CNR2	0	106.573	33.5658	5.06892	1.62303e-14	1.47446e-13
	UBAC2-AS1	412.98	1159.99	2.76184	1.46563	1.62647e-14	1.47676e-13
	ANP32AP1	485.514	95.0042	0.209357	-2.25597	1.62819e-14	1.4775e-13
	HARS2	1968.78	805.315	0.413871	-1.27275	1.63295e-14	1.48098e-13
	EPG5	3054.47	5688.16	1.85497	0.891394	1.70474e-14	1.54523e-13
	RPL13A	5856.02	11492.5	1.94804	0.962024	1.70705e-14	1.54646e-13
	ARID4B	1281.55	2736.88	2.12164	1.08518	1.74694e-14	1.58172e-13
	METTL5	947.806	300.649	0.323936	-1.62622	1.75141e-14	1.58399e-13
	MINA	1156.39	402.411	0.354284	-1.49702	1.75066e-14	1.58399e-13
	ETAA1	799.78	220.708	0.285419	-1.80885	1.76616e-14	1.59644e-13
	CDIP1	663.392	1621.52	2.41769	1.27363	1.79446e-14	1.62112e-13
	RBM19	37001.4	61544.8	1.65944	0.730693	1.79895e-14	1.62426e-13
	GPR1	321.921	39.0765	0.139186	-2.84491	1.81065e-14	1.63392e-13
	GRIA1	19.0656	231.134	9.54886	3.25533	1.82879e-14	1.64937e-13
	FAM126B	670.916	1637.24	2.40909	1.26849	1.8425e-14	1.66081e-13
	KLLN	50.8302	383.653	6.66782	2.73721	1.89153e-14	1.70406e-13
	KIAA1430	1206.62	436.164	0.367904	-1.4426	1.99468e-14	1.79599e-13
	ARTN	59.6219	373.605	5.68213	2.50643	2.06479e-14	1.85808e-13
	PPP2R5C	2782.78	1325.64	0.479491	-1.06042	2.06862e-14	1.86049e-13
	WDFY1	3042.83	1460.71	0.482689	-1.05084	2.09655e-14	1.88457e-13
	MRPS26	1432.73	556.727	0.393785	-1.34452	2.10624e-14	1.89223e-13
	ORC2	1013.31	330.52	0.33307	-1.5861	2.12279e-14	1.90605e-13
	LMAN1L	0.421563	111.965	30.0246	4.90807	2.20919e-14	1.98252e-13
	TALDO1	4837.88	9119.16	1.87168	0.904332	2.22027e-14	1.99136e-13
	PLEKHM3	566.014	1437.57	2.50627	1.32554	2.23487e-14	2.00335e-13
	LOC146880	861.307	1970.98	2.26489	1.17944	2.34055e-14	2.09692e-13
	NMI	742.106	182.929	0.256057	-1.96546	2.37143e-14	2.12341e-13
	RREB1	1885.4	795.313	0.425237	-1.23366	2.47155e-14	2.21184e-13
	RGS19	668.659	167.523	0.261123	-1.9372	2.48884e-14	2.22608e-13
	CTB-12O2.1	0	104.864	32.934	5.04151	2.49521e-14	2.23055e-13
	EME1	1388.22	459.634	0.331493	-1.59295	2.52534e-14	2.25624e-13
	INSR	438.795	1239.4	2.76511	1.46734	2.52836e-14	2.2577e-13
	LAMC1	22435.9	37845.4	1.68257	0.750669	2.54104e-14	2.26777e-13
	HERPUD1	929.148	2111.5	2.2593	1.17587	2.6133e-14	2.33097e-13
	RIF1	3556.98	1761.98	0.497232	-1.00801	2.63742e-14	2.35119e-13
	MYBL2	8546.88	4486.36	0.524292	-0.931557	2.65955e-14	2.36962e-13
	IL13	2.52938	151.887	22.4899	4.49121	2.716e-14	2.41858e-13
	SNAPIN	918.04	271.629	0.305145	-1.71243	2.75835e-14	2.45495e-13
	TOLLIP	884.969	2086.78	2.32488	1.21716	2.78912e-14	2.48097e-13
	FZD1	1128.94	397.353	0.358828	-1.47863	2.82668e-14	2.513e-13
	CEBPB	1902.87	3911.84	2.04242	1.03028	2.96086e-14	2.63085e-13
	PAQR3	2001.13	874.471	0.441315	-1.18012	2.96622e-14	2.63416e-13
	TEAD4	2067.64	911.893	0.444184	-1.17077	2.98922e-14	2.65314e-13
	GINS1	1080.48	359.28	0.338146	-1.56428	3.04131e-14	2.69789e-13
	C18orf54	912.323	290.059	0.325335	-1.62	3.06306e-14	2.7157e-13
	PHF10	927.325	293.503	0.323648	-1.6275	3.15471e-14	2.79543e-13
	HSD52	4.37203	148.323	17.6953	4.1453	3.16639e-14	2.80425e-13
	MAGEF1	2121.53	950.962	0.452094	-1.14531	3.18521e-14	2.81937e-13
	FAM213B	790.711	227.522	0.296139	-1.75565	3.21437e-14	2.84363e-13
	PNPO	1192.46	2569.72	2.13252	1.09256	3.23956e-14	2.86435e-13
	USP51	232.62	18.3342	0.101371	-3.30229	3.27803e-14	2.89679e-13
	NFE2L2	4022.35	7388.81	1.8266	0.869158	3.30596e-14	2.91987e-13
	RPS24	11101.9	19008.3	1.70713	0.77157	3.33136e-14	2.9407e-13
	SOCS7	1659.38	3338.72	2.00062	1.00044	3.35779e-14	2.96243e-13
	DCST2	5.79312	156.459	15.8043	3.98224	3.39935e-14	2.99746e-13
	CHERP	2352.26	4491.43	1.90238	0.927807	3.40901e-14	3.00271e-13
	CLCN7	2127.66	4157.4	1.9438	0.958879	3.40798e-14	3.00271e-13
	BMP10	0	103.564	32.4699	5.02103	3.43333e-14	3.02249e-13
	CEP68	670.386	175.973	0.273148	-1.87224	3.46947e-14	3.05265e-13
	CHP1	1489.71	3054.06	2.03426	1.0245	3.5217e-14	3.09692e-13
	TANGO6	564.548	128.64	0.239948	-2.0592	3.56391e-14	3.13234e-13
	CDH22	10.6388	187.396	12.2741	3.61755	3.59627e-14	3.15907e-13
	PDXP	1435.74	567.92	0.4009	-1.31869	3.7469e-14	3.2896e-13
	POLR1B	1524.55	616.868	0.409656	-1.28751	3.79428e-14	3.32939e-13
	THUMPD3-AS1	396.04	1124.99	2.78518	1.47777	3.88572e-14	3.40778e-13
	POPDC2	30.3346	275.386	7.65228	2.93589	3.89431e-14	3.41347e-13
	NECAP1	1390.22	535.44	0.3902	-1.35771	3.9089e-14	3.42441e-13
	RNMT	1276.3	2707.29	2.10794	1.07583	3.94583e-14	3.4549e-13
	ZNF692	661.737	174.986	0.274845	-1.86331	3.97557e-14	3.47905e-13
	APH1B	959.362	314.891	0.335419	-1.57597	3.99679e-14	3.49574e-13
	S100A11	6646.54	11724.4	1.76152	0.816819	3.99954e-14	3.49625e-13
	LOC646268	0	103.658	32.2115	5.00951	4.02682e-14	3.51821e-13
	ST13	2684.62	5030.96	1.86579	0.89979	4.17971e-14	3.64982e-13
	C17orf82	2.79005	136.993	20.9166	4.38658	4.19865e-14	3.66438e-13
	LOC100507053	50.5606	340.318	6.02086	2.58997	4.2533e-14	3.71008e-13
	METAP1	2900.53	1408.84	0.488777	-1.03275	4.2952e-14	3.74461e-13
	LOC284889	141.703	613.558	4.14136	2.05011	4.39101e-14	3.82608e-13
	CABP4	1.26469	121.874	25.1159	4.65053	4.48972e-14	3.90999e-13
	DPYSL2	1806.6	4320.18	2.33713	1.22474	4.58856e-14	3.99392e-13
	FAM212B-AS1	14.3242	210.212	10.8454	3.43901	4.65632e-14	4.05072e-13
	CYP4F2	0.947394	119.273	26.8761	4.74825	4.65919e-14	4.05105e-13
	RTKN	733.111	208.453	0.293693	-1.76762	4.67941e-14	4.06644e-13
	CHD9	2763.65	5204.43	1.87205	0.904619	4.75384e-14	4.12891e-13
	DSC3	747.628	1752.42	2.32391	1.21655	4.82584e-14	4.1892e-13
	KANK4	10.904	194.945	12.3534	3.62684	4.86827e-14	4.22377e-13
	SLC35B4	3403.86	1710.27	0.505063	-0.985464	4.95983e-14	4.30091e-13
	NUP43	1848.67	796.039	0.434253	-1.20339	5.04598e-14	4.37328e-13
	PANK4	1478.23	577.332	0.395323	-1.3389	5.06683e-14	4.389e-13
	FST	992.011	325.738	0.337379	-1.56756	5.07412e-14	4.39296e-13
	ZDHHC13	662.75	171.398	0.26955	-1.89137	5.10888e-14	4.4207e-13
	FGD5-AS1	6182.41	3376.78	0.547505	-0.869055	5.23045e-14	4.52347e-13
	ADAMTS18	5.79312	154.823	15.5982	3.96331	5.34727e-14	4.62204e-13
	LOC100128770	0.473697	108.729	28.813	4.84865	5.37855e-14	4.64659e-13
	MYCBP2	3290.74	6260.64	1.89035	0.918651	5.51878e-14	4.7652e-13
	CUEDC1	3290.45	1644.38	0.502698	-0.992236	5.75753e-14	4.96871e-13
	NYNRIN	221.646	831.308	3.61173	1.85269	5.85479e-14	5.04995e-13
	WDR26	4861.28	8659.93	1.77357	0.826654	6.0244e-14	5.19348e-13
	USP34	2788.49	5436.04	1.93051	0.948982	6.14381e-14	5.29361e-13
	BCAM	8004.23	13688.2	1.70574	0.770397	6.20178e-14	5.34071e-13
	SHANK2	880.088	2201.25	2.4603	1.29884	6.30505e-14	5.42677e-13
	GLE1	2018.92	3955.11	1.94773	0.961795	6.31538e-14	5.43277e-13
	FIP1L1	1884.42	813.18	0.434548	-1.20241	6.3777e-14	5.48347e-13
	SLC25A24	3286.56	1597.19	0.487321	-1.03706	6.40525e-14	5.50424e-13
	TRAF3IP2-AS1	225.553	808.834	3.4523	1.78756	6.41425e-14	5.50905e-13
	ABTB2	598.092	1540.57	2.54547	1.34793	6.46195e-14	5.54708e-13
	PRKY	528.96	1452.81	2.67733	1.4208	6.49536e-14	5.57281e-13
	THOP1	2687.22	1211.98	0.452869	-1.14283	6.56181e-14	5.62684e-13
	CRY2	913.548	2123.23	2.29637	1.19936	6.70499e-14	5.74658e-13
	ALPK3	22.9073	243.941	8.64117	3.11123	6.74633e-14	5.77895e-13
	FLYWCH1	1395.17	2864.38	2.03993	1.02852	7.08416e-14	6.06513e-13
	DONSON	1504.71	610.021	0.409866	-1.28678	7.10522e-14	6.07995e-13
	HNRNPC	11991.9	20770.7	1.72538	0.786911	7.25387e-14	6.20388e-13
	TTL	2309.63	1065.59	0.464906	-1.10499	7.36019e-14	6.29148e-13
	LRP6	2150.89	4120.06	1.90625	0.930734	7.37487e-14	6.30071e-13
	HOXC13	439.751	1196.44	2.67291	1.41841	7.42119e-14	6.33695e-13
	FZR1	2408.52	1127.6	0.471714	-1.08402	7.47889e-14	6.38285e-13
	GATA4	384.776	64.1388	0.18327	-2.44796	7.61772e-14	6.49792e-13
	CASP8AP2	1417.79	539.648	0.384527	-1.37884	7.63197e-14	6.50665e-13
	TELO2	1918.14	838.969	0.441472	-1.17961	7.76272e-14	6.61464e-13
	GSK3B	2535.48	4803.22	1.88588	0.915241	7.95725e-14	6.77574e-13
	UGT8	899.037	267.429	0.303915	-1.71826	7.96015e-14	6.77574e-13
	CEP57	1087.58	381.451	0.35803	-1.48185	7.96489e-14	6.77622e-13
	ZNF521	431.773	81.7276	0.20368	-2.29562	8.44222e-14	7.17855e-13
	CLDN15	310.19	940.624	2.96014	1.56567	8.45874e-14	7.18882e-13
	COL13A1	3994.9	7135.4	1.78106	0.832737	8.68352e-14	7.37599e-13
	MAT2A	7393.53	4151.11	0.563295	-0.828038	8.69633e-14	7.383e-13
	USP6	43.6071	313.269	6.33185	2.66263	8.7679e-14	7.43986e-13
	HSP90B2P	1888.73	3872.06	2.03293	1.02356	8.79277e-14	7.45706e-13
	HEIH	479.564	96.6051	0.215451	-2.21457	8.80057e-14	7.45978e-13
	SMAGP	691.324	182.677	0.274236	-1.86651	8.8273e-14	7.47851e-13
	FLJ33360	0	99.9276	31.1046	4.95906	8.83647e-14	7.48237e-13
	CAMKK1	2721.03	5048.38	1.84837	0.886253	9.22388e-14	7.80634e-13
	GRTP1-AS1	0.421563	107.997	28.2662	4.82101	9.50295e-14	8.03832e-13
	SRSF10	4547.09	2402.41	0.530713	-0.913996	9.50971e-14	8.03985e-13
	ADAM11	158.592	614.213	3.7229	1.89643	9.51765e-14	8.04236e-13
	ZNF639	1036.58	292.974	0.290922	-1.78129	9.78722e-14	8.26584e-13
	ARRDC3-AS1	43.4462	313.373	6.34542	2.66571	9.81053e-14	8.28121e-13
	HNF1B	0	99.689	30.9169	4.95032	1.00206e-13	8.45417e-13
	CLK4	1002.98	328.077	0.333633	-1.58367	1.00264e-13	8.45462e-13
	WDR90	1244.07	464.104	0.379453	-1.39801	1.0147e-13	8.55185e-13
	ADCY3	2488.07	1181.95	0.478405	-1.0637	1.01622e-13	8.56024e-13
	FOXD2	396.357	1139.27	2.80881	1.48996	1.02697e-13	8.64629e-13
	KLHL3	4.42416	142.244	16.8893	4.07804	1.0338e-13	8.69928e-13
	MYO1B	3570.95	1795.14	0.505986	-0.982832	1.05108e-13	8.84012e-13
	SNRNP40	2262.4	1050.21	0.467922	-1.09566	1.06394e-13	8.94362e-13
	MBOAT1	860.611	263.89	0.313631	-1.67286	1.06577e-13	8.95431e-13
	SGSM2	2218.54	1007.32	0.457139	-1.1293	1.07077e-13	8.99172e-13
	FLNC	7127.75	12247	1.71416	0.777498	1.07174e-13	8.99516e-13
	HYLS1	538.003	124.582	0.244198	-2.03387	1.08502e-13	9.10191e-13
	C6orf222	0.473697	105.972	27.944	4.80447	1.0926e-13	9.16075e-13
	REEP1	320.525	43.3617	0.153839	-2.70051	1.11409e-13	9.33612e-13
	NUP50-AS1	233.141	775.689	3.22887	1.69103	1.17043e-13	9.80319e-13
	NFIB	518.19	115.698	0.236682	-2.07898	1.22184e-13	1.02285e-12
	BIVM	1642.26	653.903	0.400411	-1.32045	1.23657e-13	1.03464e-12
	MLX	2237.67	1035.98	0.466426	-1.10028	1.24004e-13	1.03702e-12
	ACCSL	6.58411	159.336	14.5621	3.86415	1.26042e-13	1.05352e-12
	TRAF3IP2	1743.45	3489.86	1.99144	0.993815	1.26411e-13	1.05605e-12
	SPIN4	918.099	264.396	0.293803	-1.76708	1.26984e-13	1.0603e-12
	C17orf70	1775.15	750.801	0.426804	-1.22836	1.27369e-13	1.06296e-12
	KRT8	444.135	1186.36	2.62126	1.39026	1.28539e-13	1.07217e-12
	MED21	972.678	313.649	0.328419	-1.60639	1.29411e-13	1.07886e-12
	PXDN	27575.7	45457.4	1.64471	0.717832	1.29474e-13	1.07886e-12
	HDAC4	829.072	1871.1	2.23558	1.16065	1.30099e-13	1.08352e-12
	SUV39H1	921.206	302.687	0.336051	-1.57325	1.30414e-13	1.08558e-12
	COPS3	3674.83	1838.63	0.503201	-0.990792	1.32762e-13	1.10455e-12
	GNS	7042.49	12043.5	1.70551	0.770204	1.35572e-13	1.12736e-12
	TEX30	2761.73	1247.19	0.454668	-1.13711	1.38431e-13	1.15054e-12
	CYP4F3	0.473697	106.549	27.7349	4.79363	1.41057e-13	1.17176e-12
	OTUD6B	799.424	246.588	0.317217	-1.65646	1.44821e-13	1.20242e-12
	ABCA4	12.3772	188.938	11.0201	3.46206	1.4514e-13	1.20444e-12
	EPM2AIP1	1338.68	2738.62	2.03256	1.02329	1.45249e-13	1.20474e-12
	MDN1	3177.07	5879.06	1.84048	0.880084	1.48697e-13	1.2327e-12
	LRIT1	0.89526	108.957	25.3542	4.66416	1.49498e-13	1.23871e-12
	UNC5CL	11.3256	193.789	11.864	3.56852	1.518e-13	1.25714e-12
	C3orf20	1.31682	113.845	23.594	4.56035	1.51903e-13	1.25735e-12
	SYTL4	1078.27	377.408	0.357009	-1.48597	1.54204e-13	1.27574e-12
	STEAP2	330.586	46.9604	0.160903	-2.63574	1.54354e-13	1.27634e-12
	HEXIM1	1891.02	840.801	0.448789	-1.15589	1.56227e-13	1.29116e-12
	COL5A3	645.604	1547.67	2.36801	1.24368	1.65076e-13	1.3636e-12
	LPP	5238.53	9769.84	1.84588	0.884307	1.68671e-13	1.39259e-12
	LINC01234	1.26469	121.249	24.1256	4.59249	1.69209e-13	1.39632e-12
	M6PR	5337.12	9880.32	1.83605	0.876606	1.69612e-13	1.39893e-12
	EHBP1	2340.09	1077.08	0.46391	-1.10808	1.69745e-13	1.39932e-12
	ACAT2	2043.1	928.702	0.458667	-1.12448	1.70974e-13	1.40873e-12
	CD2AP	2278.46	1066.91	0.471857	-1.08358	1.72126e-13	1.4175e-12
	AFF3	162.411	687.625	3.98192	1.99346	1.74414e-13	1.43562e-12
	PAICS	5893.29	3252.52	0.553814	-0.852526	1.74777e-13	1.43723e-12
	PARPBP	828.512	257.255	0.318825	-1.64916	1.74876e-13	1.43723e-12
	SPICE1	764.713	187.616	0.254567	-1.97388	1.7486e-13	1.43723e-12
	HEXA	4480.26	8007.93	1.78249	0.833893	1.75234e-13	1.43919e-12
	ITGA3	35698.5	58064.9	1.62394	0.6995	1.75292e-13	1.43919e-12
	SVIL	2974.31	5491.35	1.83722	0.877525	1.77648e-13	1.45779e-12
	KLC3	65.9364	382.068	5.26928	2.3976	1.79139e-13	1.46928e-12
	PTPN3	2025.74	903.752	0.44942	-1.15386	1.81465e-13	1.48761e-12
	LSM2	1180.03	428.643	0.369326	-1.43704	1.82842e-13	1.49814e-12
	HTR5A	0	97.112	30.0652	4.91002	1.8384e-13	1.50556e-12
	HELZ	1546.58	3085.86	1.98474	0.988953	1.85729e-13	1.52026e-12
	FLT3	9.74359	173.109	12.1022	3.59719	1.86462e-13	1.52549e-12
	TSC22D4	1004.51	2252.7	2.21248	1.14567	1.90018e-13	1.5538e-12
	TENC1	577.551	141.857	0.257632	-1.95661	1.92454e-13	1.57292e-12
	MON1A	422.272	81.3896	0.208054	-2.26497	1.98759e-13	1.62363e-12
	LEPREL1	8668.61	14772.2	1.69864	0.764384	2.01438e-13	1.64468e-12
	ARHGEF1	3709.27	1766.56	0.476666	-1.06895	2.02924e-13	1.65599e-12
	RAD54L	1516.98	562.632	0.371497	-1.42858	2.05947e-13	1.67981e-12
	TULP2	0	96.8116	29.8942	4.90179	2.06815e-13	1.68604e-12
	FAM193B	2237.83	1003.01	0.452527	-1.14392	2.07967e-13	1.69458e-12
	HLA-DMA	49.5611	332.997	5.97895	2.57989	2.08793e-13	1.70046e-12
	SPOCK1	1084.51	2299.54	2.10381	1.073	2.10166e-13	1.71078e-12
	C14orf182	19.222	218.214	8.96462	3.16424	2.11849e-13	1.72361e-12
	PRKACB	2676.09	1296.52	0.48764	-1.03611	2.13862e-13	1.73912e-12
	MAVS	3587.11	1822.92	0.51029	-0.97061	2.14042e-13	1.73971e-12
	UFD1L	3930.74	6967.24	1.76704	0.821335	2.14351e-13	1.74135e-12
	ZNF205-AS1	7.53151	160.889	13.485	3.75329	2.14716e-13	1.74344e-12
	VPS26A	2150.36	4311.17	1.9868	0.990446	2.17527e-13	1.76538e-12
	COL6A2	20155.2	33101.6	1.63794	0.711887	2.20104e-13	1.7854e-12
[truncated: 7,769 more rows]

## Sheet: HCT116 TP53 KO
Total RNA-seq - HCT116 TP53ko - DESeq2 Results (Nutlin vs. DMSO) - Refseq genes - padj < 0.05
	Gene ID	Base Mean DMSO	Base Mean Nutlin	Fold Change	Fold Change (log2)	p	padj
	KCNJ2	3741.72	835.398	0.223266	-2.16317	1.10127e-60	1.12164e-56
	NR1D1	4603.81	1804.77	0.392017	-1.35101	4.08279e-36	2.07916e-32
	SLC30A1	1258.18	333.563	0.265115	-1.91531	3.19211e-25	1.08372e-21
	NR1D2	4367.32	1786.17	0.408986	-1.28988	4.74996e-23	1.20946e-19
	DDIT4	232.503	1033.11	4.44344	2.15168	1.06567e-21	2.17077e-18
	CHAC1	89.8065	448.761	4.99698	2.32106	8.60477e-17	1.46066e-13
	SPRY4	2597.34	4723.42	1.81856	0.862799	1.96941e-16	2.86549e-13
	CYR61	3174.57	1799.57	0.566872	-0.818906	3.27115e-13	4.16459e-10
	HSPA1B	4552.62	7299.76	1.60342	0.681153	8.34322e-13	9.44174e-10
	EGR1	2145.37	3995.77	1.86251	0.897248	1.66757e-12	1.69842e-09
	F3	7627.15	4600.11	0.603122	-0.729478	3.66111e-12	3.38986e-09
	IRF2BPL	2017.56	3347.78	1.65932	0.730592	5.43772e-11	4.61527e-08
	CCND1	41640	28549.4	0.685625	-0.544508	7.69991e-11	6.03259e-08
	DNAJB1	10271.9	14911	1.45164	0.537684	3.3143e-10	2.41058e-07
	PPIA	15700.5	10515.3	0.669741	-0.578324	3.5502e-10	2.41058e-07
	ZFP36	1092.87	1973.99	1.80624	0.85299	7.03301e-10	4.47695e-07
	SLC7A11	1012.48	1847.59	1.82481	0.867749	2.38241e-09	1.42734e-06
	PLK2	4544.26	3023.32	0.665305	-0.587912	8.83685e-09	5.00019e-06
	FDXR	1896.56	2990.03	1.57655	0.656775	1.00255e-08	5.37421e-06
	SNHG3	3488.08	2272.91	0.651623	-0.61789	1.22797e-08	6.25344e-06
	RABGGTB	7840.62	5472.38	0.697953	-0.518799	1.56536e-08	7.2469e-06
	SOX9	1376.02	2228.62	1.61961	0.695644	1.5343e-08	7.2469e-06
	SRSF6	11835.5	8447.52	0.713744	-0.486521	2.26119e-08	1.00131e-05
	JUNB	2158.85	3332.86	1.54381	0.626497	2.43737e-08	1.03436e-05
	CD44	13192.6	9362.7	0.709695	-0.494729	2.96595e-08	1.20833e-05
	DUSP6	4673.81	6681.49	1.42956	0.515569	5.9851e-08	2.34455e-05
	DUSP5	4635.38	6629.58	1.43021	0.516229	1.27216e-07	4.79887e-05
	MT1X	639.684	1136.52	1.7767	0.829197	2.20908e-07	7.75844e-05
	SNHG7	4578.18	3179.6	0.694512	-0.525928	2.19573e-07	7.75844e-05
	CPA4	5175.45	3379.19	0.652927	-0.615006	2.72942e-07	9.2664e-05
	ZNF740	1252.44	1962.74	1.56714	0.648132	3.58242e-07	0.0001177
	TNFRSF1A	2523.63	3725.28	1.47616	0.561847	3.98227e-07	0.000126748
	MYL9	3996.91	2593	0.648751	-0.624264	6.29311e-07	0.000192939
	PHF13	1253.77	1956.48	1.56048	0.641994	6.44076e-07	0.000192939
	HNRNPDL	16306	12188.4	0.747481	-0.419891	7.22184e-07	0.000210155
	PPP1R18	1579.78	2368.51	1.49927	0.584256	1.05439e-06	0.000298305
	SIK1	1798.14	1155.5	0.642606	-0.637993	1.0948e-06	0.000301367
	SNHG1	10418.2	7641.32	0.733457	-0.447217	1.43598e-06	0.000384879
	RBM12	6202.36	4234.11	0.682661	-0.550759	1.69705e-06	0.000443191
	IER5L	2137.18	3134.13	1.46648	0.552359	2.31385e-06	0.000589165
	MIR17HG	811.503	441.986	0.544651	-0.876597	2.4457e-06	0.000607549
	ACTB	79882.9	58967.7	0.738178	-0.43796	2.83611e-06	0.000687758
	MTRNR2L1	10171.7	7631.01	0.750221	-0.414613	3.11561e-06	0.000737964
	TSR1	11714.5	8765.7	0.748277	-0.418357	3.38567e-06	0.000783707
	SRSF5	8159.47	6015.99	0.737301	-0.439674	3.7168e-06	0.000841236
	BTG2	269.5	541.745	2.01019	1.00733	5.67123e-06	0.00120425
	DDIT3	967.97	1534.92	1.58571	0.665126	5.6208e-06	0.00120425
	TRIB3	1559.18	2429.25	1.55803	0.63972	5.67542e-06	0.00120425
	ACTG1	290047	218498	0.75332	-0.408665	8.20748e-06	0.00170598
	SERTAD3	513.374	875.977	1.70631	0.770882	9.12139e-06	0.00185803
	TINAGL1	2896.97	4137.95	1.42837	0.514373	1.06616e-05	0.00212918
	NR4A2	1109.54	689.849	0.621746	-0.685604	1.3103e-05	0.00256643
	GADD45B	1871.38	1272.11	0.67977	-0.55688	1.5574e-05	0.00299285
	ACSL5	9841.88	7444.66	0.756427	-0.402727	1.59683e-05	0.00301179
	FLYWCH1	2021.56	2894.51	1.43182	0.517854	1.62658e-05	0.00301213
	PHLDB2	10994.5	8479.64	0.771261	-0.374709	2.22013e-05	0.00403786
	MYOF	23370.1	17641.1	0.754856	-0.405727	2.39971e-05	0.0042879
	PGPEP1	256.427	492.733	1.92153	0.942256	2.83252e-05	0.00497401
	NOP56	29437.4	22863.3	0.776675	-0.364618	3.17544e-05	0.00548166
	ANXA3	10891	8470.13	0.777721	-0.362676	3.93345e-05	0.00650408
	GID4	316.927	573.12	1.80837	0.854687	3.95928e-05	0.00650408
	SNHG12	2807.57	1951.88	0.695221	-0.524457	3.84851e-05	0.00650408
	SLC38A2	12877.2	16358	1.27031	0.345181	4.36938e-05	0.00706383
	ZBTB7B	1567.92	2214.23	1.41221	0.497955	4.69429e-05	0.00747052
	ZNF594	200.81	401.259	1.9982	0.998701	5.6962e-05	0.0089255
	SRSF7	11302.2	8806.32	0.779172	-0.359986	6.63311e-05	0.0102361
	ZBTB2	1930.17	1361.73	0.705497	-0.503288	6.87347e-05	0.0104487
	NOLC1	13757.9	10873.6	0.790355	-0.339427	7.70738e-05	0.0115441
	HNRNPH3	7940.66	6073.65	0.764879	-0.386696	7.82683e-05	0.0115531
	ARMC7	1164.11	1672.52	1.43673	0.522792	8.38446e-05	0.0120387
	CAPN2	15914.1	12455.3	0.782661	-0.353541	8.51044e-05	0.0120387
	TRIB1	10778.8	8489.43	0.787603	-0.34446	8.40316e-05	0.0120387
	MYH15	1415.23	916.972	0.647932	-0.626086	8.87665e-05	0.0123847
	BHLHE41	336.557	151.024	0.448732	-1.15608	9.10241e-05	0.0124145
	ETV5	1753.22	2411.27	1.37534	0.45979	9.25542e-05	0.0124145
	GRB7	510.855	853.69	1.6711	0.740799	9.31735e-05	0.0124145
	OR51B4	381.257	647.747	1.69898	0.764665	9.5074e-05	0.0124145
	SMIM3	942.701	1388.48	1.47287	0.558629	9.4306e-05	0.0124145
	HNRNPU-AS1	274.912	507.796	1.84713	0.885282	9.81282e-05	0.0126511
	SLC39A10	1497	1029.88	0.687959	-0.539606	9.95579e-05	0.012675
	ZNF16	761.796	467.679	0.613916	-0.703887	0.000108564	0.0136509
	CLK1	1095.16	1595.55	1.45691	0.542911	0.000120612	0.0149808
	CRY1	704.859	1100.51	1.56132	0.642764	0.000138095	0.0169457
	RSL1D1	13492.6	10769.2	0.798159	-0.325251	0.000141272	0.0171293
	IER3	23429.6	29692.9	1.26732	0.341781	0.000144103	0.0172669
	HCFC1	8488.64	6688.99	0.787994	-0.343743	0.000151639	0.0175812
	MT1E	7753.7	16918.6	2.182	1.12565	0.000149786	0.0175812
	PPP1R15A	3171.3	2334.16	0.736027	-0.44217	0.000151904	0.0175812
	SNORD22	328.759	154.455	0.469811	-1.08985	0.000159397	0.0182411
	DUS3L	4149.4	3086.75	0.743902	-0.426815	0.000167496	0.0189108
	MRTO4	9227.64	7315.23	0.792751	-0.33506	0.000168962	0.0189108
	CTDSP2	2091.75	2810.89	1.3438	0.426314	0.000171864	0.0190264
	CIRH1A	8665.13	6783.06	0.782799	-0.353286	0.00019861	0.021751
	DNTTIP2	5280.17	4101.13	0.776704	-0.364563	0.000207447	0.0222405
	PPRC1	11124.5	8890.99	0.799226	-0.323324	0.000205428	0.0222405
	SRSF3	15654.6	12614.6	0.805809	-0.31149	0.000230319	0.0244355
	GABARAPL1	651.993	991.682	1.521	0.605021	0.000236577	0.0245871
	SMAD7	360.309	185.599	0.515111	-0.957045	0.000236044	0.0245871
	SESN2	517.578	841.528	1.6259	0.701236	0.000247021	0.0254132
	CEBPB	1196.12	1727.37	1.44415	0.530218	0.00026974	0.0272839
	RARS	6814.92	5381.35	0.789642	-0.340729	0.000270562	0.0272839
	ARHGEF2	1668.84	2256.39	1.35207	0.435172	0.00027607	0.0275664
	CLIP2	1020.14	1471.97	1.4429	0.528973	0.000281755	0.027593
	STK40	1274.78	1765.63	1.38505	0.469937	0.000281002	0.027593
	KRT15	721.004	450.82	0.625267	-0.677457	0.00028466	0.027612
	CIRBP	6596.41	5210.09	0.789837	-0.340373	0.000294419	0.0282137
	GUF1	2332.5	1717.5	0.736335	-0.441566	0.000296404	0.0282137
	C15orf39	2393.75	1779.5	0.743396	-0.427798	0.000301302	0.028228
	CTSD	3951.95	5050.81	1.27806	0.353951	0.000302096	0.028228
	NOP58	7329.15	5720.14	0.780465	-0.357595	0.000305426	0.0282796
	GAS5	5167.78	3977.51	0.769674	-0.37768	0.000310451	0.0284859
	PTP4A1	19750.3	16027.6	0.811513	-0.301313	0.000315296	0.0286723
	ZNF551	901.282	594.671	0.659805	-0.599888	0.000331805	0.0299065
	EIF4A2	12355	9962.37	0.806346	-0.31053	0.000354193	0.0316443
	BBC3	231.717	431.976	1.86424	0.898586	0.000360856	0.0316837
	DDX10	3732.25	2883.14	0.772495	-0.372403	0.000360144	0.0316837
	MIR22HG	616.337	378.347	0.613864	-0.70401	0.000370859	0.0322837
	SEC24D	1176.86	1641.7	1.39499	0.480252	0.000383607	0.0331105
	USP36	4860.82	3787.38	0.779166	-0.359998	0.000409853	0.0350786
	FTL	27109.4	33023.4	1.21815	0.284694	0.000424715	0.0360477
	SNHG15	1947.16	1424.37	0.731508	-0.451054	0.000431042	0.0362823
	AARS	8022.83	9947.77	1.23993	0.310261	0.00045503	0.0377868
	GEMIN4	7200.03	5741.09	0.79737	-0.32668	0.000456336	0.0377868
	PPARA	361.735	599.331	1.65682	0.72842	0.00047706	0.0387542
	SCNN1A	855.962	1226.67	1.43308	0.519124	0.000483238	0.0387542
	TEAD3	1327.77	1810.62	1.36366	0.447482	0.000482566	0.0387542
	VCPIP1	907.879	1287.99	1.41868	0.504547	0.000481109	0.0387542
	PABPC4	11795.9	9563.85	0.810778	-0.302621	0.000490741	0.0390484
	CARS	2793.79	3631.96	1.30001	0.378525	0.000499998	0.0394766
	PVRL3	4119.57	3185.32	0.773215	-0.371058	0.000519606	0.0407091
	BCLAF1	8961.73	6904.57	0.77045	-0.376227	0.000532886	0.0414308
	MISP	3585.79	2765.31	0.771185	-0.374851	0.000554479	0.0427831
	MATR3	12400.6	10095	0.81407	-0.296775	0.000568919	0.0435672
	SQSTM1	14550.6	17757.9	1.22042	0.287382	0.000578271	0.0439529
	HMGN4	2191.35	2858.04	1.30424	0.383207	0.000589614	0.0444831
	DHRS3	686.152	1041.1	1.51731	0.601514	0.000620284	0.0464529
	PDP2	952.872	1347.99	1.41466	0.500453	0.00062486	0.046454
	KRT80	881.378	562.694	0.638425	-0.647411	0.00065754	0.0485293
	SRSF2	21299	16849.7	0.791103	-0.338063	0.000673138	0.0493231
	TRIM23	441.016	691.661	1.56833	0.649234	0.000683002	0.0496884
