# Supplementary material for: Identification of a core TP53 transcriptional program with highly distributed tumor suppressive activity
Source: HighWire-hosted journal article supplement (doi:10.1101/gr.220533.117), 2017-09-13
Supplement: Supplemental_File_S3_Polysomal_RNAseq_data.xlsx [file Supplemental_File_S3_Polysomal_RNAseq_data.xlsx]

## Sheet: HCT116
Polysomal RNA-seq - HCT116 - DESeq2 Results (Nutlin vs. DMSO) - Refseq genes - padj < 0.05
	Gene ID	Base Mean DMSO	Base Mean Nutlin	Fold Change	Fold Change (log2)	p	padj
	TP53I3	746.814	10420.4	12.2971	3.62025	8.99141e-73	1.12977e-68
	CDKN1A	12216.8	138744	10.2114	3.35211	3.92618e-69	2.46662e-65
	TP53INP1	203.358	2652.77	11.1036	3.47295	3.1075e-54	1.30152e-50
	WDR76	3644.69	373.488	0.116791	-3.098	1.9658e-48	6.17508e-45
	GPR87	138.718	1896.1	11.5452	3.52922	2.76177e-48	6.94032e-45
	BTG2	1382.62	10790.5	7.11	2.82985	1.84571e-46	3.86521e-43
	INPP5D	32.794	741.826	15.6001	3.96349	8.65531e-42	1.55363e-38
	ZNF367	2412.6	246.352	0.118032	-3.08275	3.41466e-41	5.36315e-38
	CLSPN	2013.36	236.569	0.134396	-2.89543	6.11872e-38	8.54241e-35
	MDM2	4215.06	26771.8	5.7733	2.5294	7.94365e-38	9.9812e-35
	KCNJ2	4016.33	519.992	0.145667	-2.77925	1.96245e-36	2.24165e-33
	CHAF1A	7507.84	1174.35	0.17217	-2.5381	1.25951e-35	1.31882e-32
	PVRL4	33.6892	650.629	13.1521	3.71722	2.03894e-35	1.97071e-32
	CDT1	11635.4	1982.21	0.185453	-2.43087	1.9319e-34	1.73388e-31
	GINS2	12305.2	2293.3	0.201495	-2.31119	2.25378e-32	1.88792e-29
	E2F2	3386.88	530.687	0.172097	-2.5387	1.28019e-31	1.00535e-28
	DTL	2415.9	292.428	0.143778	-2.79809	2.95699e-31	2.18556e-28
	RINL	768.195	4423.12	5.21635	2.38304	6.7038e-31	4.67963e-28
	CCNE2	1466.03	165.112	0.132588	-2.91498	8.23702e-31	5.44727e-28
	CDC45	3535.48	580.119	0.183439	-2.44663	1.19749e-30	7.52325e-28
	MCM2	6537.68	1088.85	0.183824	-2.4436	1.46334e-30	8.75566e-28
	PTAFR	145.228	1250.26	7.20864	2.84973	1.63049e-30	9.31234e-28
	PKMYT1	7981.71	1513.92	0.204691	-2.28848	8.18293e-30	4.47037e-27
	PLK1	13030.8	2363.7	0.19774	-2.33832	9.87146e-30	5.16812e-27
	CDC20	21975.1	4090.6	0.203115	-2.29963	1.29764e-29	6.52194e-27
	HES2	660.893	3767.46	5.18357	2.37395	2.38643e-29	1.15329e-26
	EXO1	3025.78	341.668	0.132999	-2.91051	2.86996e-29	1.33559e-26
	ORC1	2282.04	375.422	0.183364	-2.44722	4.57388e-29	2.05253e-26
	MCM5	9922.02	1559.92	0.176159	-2.50505	1.25016e-28	5.41665e-26
	LMNB1	5416.71	1047.45	0.210653	-2.24706	1.4596e-28	6.11329e-26
	CDC25A	3930.33	628.15	0.180605	-2.46909	5.03992e-28	2.04279e-25
	ATAD2	4074.26	778.497	0.207424	-2.26934	2.46141e-27	9.66488e-25
	E2F8	2029.24	348.078	0.191057	-2.38792	2.74656e-27	1.04577e-24
	PLK2	512.044	2750.18	4.8873	2.28904	6.82124e-27	2.52085e-24
	CDCA5	16398.2	3625.02	0.237306	-2.07518	8.96662e-27	3.21902e-24
	ASF1B	9212.65	1943.71	0.228938	-2.12697	1.1198e-26	3.9084e-24
	MKI67	16039.5	3135.25	0.216287	-2.20898	1.95907e-26	6.65288e-24
	SULF2	343.697	2525.6	6.3217	2.66031	2.90943e-26	9.62026e-24
	CDC6	6861.44	1297.11	0.205948	-2.27965	3.14784e-26	1.01417e-23
	MCM7	28975.6	5850.79	0.223368	-2.16251	5.53323e-26	1.73813e-23
	KIFC1	3242.44	530.635	0.181907	-2.45872	1.27247e-25	3.89965e-23
	RRM2	25450.8	4577.58	0.198949	-2.32953	1.40817e-25	4.21279e-23
	MCM10	3133.88	488.114	0.176545	-2.50189	1.88903e-25	5.51992e-23
	CYFIP2	2249.89	10077.7	4.16074	2.05684	3.33491e-25	9.52344e-23
	GDF15	3322.58	14568.3	4.06292	2.02252	4.17269e-25	1.16511e-22
	CCNA2	8943.53	1663.3	0.202647	-2.30296	4.95334e-25	1.35301e-22
	TACC3	9343.14	1812.93	0.21466	-2.21988	5.50302e-25	1.47118e-22
	SKA1	1842.88	339.533	0.205112	-2.28552	1.23101e-24	3.22242e-22
	ANLN	3991.18	862.349	0.233897	-2.09605	1.79064e-24	4.59171e-22
	NCAPG	4249.33	804.967	0.20776	-2.26701	2.96057e-24	7.43991e-22
	FAS	758.296	4348.36	5.06057	2.3393	3.56177e-24	8.44409e-22
	RAD51	3427.69	664.345	0.215855	-2.21186	3.48462e-24	8.44409e-22
	RAD54L	3150.8	651.268	0.22707	-2.13879	3.55354e-24	8.44409e-22
	ABCA12	9.93288	290.772	13.6592	3.7718	3.90233e-24	9.08015e-22
	PRC1	9538.29	1687.78	0.202698	-2.3026	5.87051e-24	1.34114e-21
	PSMC3IP	2994.97	601.044	0.222438	-2.16852	8.81813e-24	1.97857e-21
	E2F1	4048.47	707.755	0.197819	-2.33775	1.99116e-23	4.38929e-21
	RPS27L	4184.98	21761.5	4.57238	2.19294	2.05821e-23	4.45886e-21
	MCM4	10308.3	1944.42	0.212831	-2.23222	2.5457e-23	5.42147e-21
	SESN1	478.899	2388.34	4.5184	2.17581	5.88443e-23	1.2323e-20
	UNG	9788.02	2418.93	0.263791	-1.92253	1.08983e-22	2.24487e-20
	HJURP	4130.13	765.316	0.206953	-2.27263	1.87839e-22	3.74635e-20
	NCAPH	4473.3	774.033	0.193873	-2.36681	1.85355e-22	3.74635e-20
	BBC3	1321.49	5678.53	3.97801	1.99205	1.96035e-22	3.84871e-20
	FEN1	15675.8	3431.51	0.235924	-2.08361	2.06168e-22	3.98539e-20
	KIF2C	4658.43	851.814	0.204425	-2.29036	2.58402e-22	4.91942e-20
	CDCA3	5322.12	1273.73	0.258203	-1.95342	3.05732e-22	5.73362e-20
	FAM212B	360.324	1823.07	4.58096	2.19565	3.20336e-22	5.91915e-20
	RFC4	6286.99	1451.53	0.251825	-1.9895	3.72365e-22	6.78082e-20
	ORC6	4537.22	1080.22	0.255942	-1.96611	4.21121e-22	7.55912e-20
	ASTN2	432.166	2050.3	4.30702	2.10669	8.99664e-22	1.59215e-19
	MCM3	14838	3194.65	0.239883	-2.05959	1.31475e-21	2.29443e-19
	TCF19	2760.05	591.667	0.233511	-2.09844	1.46686e-21	2.5248e-19
	FDXR	3677.78	14150.8	3.61405	1.85362	1.7638e-21	2.99488e-19
	DSCC1	4310.67	1046.77	0.261224	-1.93664	3.12528e-21	5.23589e-19
	HMGB2	39539.1	10365.6	0.282888	-1.82169	4.77001e-21	7.8862e-19
	BLM	1239.96	232.935	0.211353	-2.24228	5.46734e-21	8.9217e-19
	DRAM1	1469.05	5800.75	3.68196	1.88047	6.04397e-21	9.61297e-19
	TPX2	11163.9	2576.93	0.254434	-1.97464	6.00249e-21	9.61297e-19
	BUB1	3488.81	783.124	0.244559	-2.03174	7.3309e-21	1.13719e-18
	ZMAT3	616.71	3023.21	4.48448	2.16494	7.31602e-21	1.13719e-18
	AURKA	4641.16	1034.95	0.24722	-2.01613	7.78564e-21	1.19301e-18
	GJB5	636.475	2777.85	4.01598	2.00575	1.02565e-20	1.55268e-18
	NEK2	3359.77	687.053	0.229926	-2.12076	1.37825e-20	2.06163e-18
	ESCO2	1651.76	248.821	0.177848	-2.49128	2.85374e-20	4.21849e-18
	SHCBP1	4309.25	757.128	0.200669	-2.31711	5.41234e-20	7.90767e-18
	CEP55	5296.41	1237.66	0.251839	-1.98942	5.68708e-20	8.21359e-18
	CENPU	2698.59	648.912	0.261295	-1.93625	8.15455e-20	1.16434e-17
	BUB1B	3187.31	743.906	0.25259	-1.98513	1.00972e-19	1.42552e-17
	CDCA8	7593.4	1760.14	0.25454	-1.97404	1.60823e-19	2.24527e-17
	MCM6	11349.7	2546.71	0.250688	-1.99603	2.07073e-19	2.8592e-17
	NDC80	1823.16	294.711	0.184518	-2.43817	2.39097e-19	3.26549e-17
	DSN1	4719.27	1155.87	0.271386	-1.88158	2.42857e-19	3.28118e-17
	BARD1	950.961	180.585	0.216457	-2.20785	5.1962e-19	6.94578e-17
	CHAF1B	3500.51	833.932	0.259537	-1.94599	5.25706e-19	6.95315e-17
	CCNF	7483.37	1947.56	0.282617	-1.82308	6.19199e-19	8.10441e-17
	GTSE1	2368.42	554.764	0.258538	-1.95155	7.61358e-19	9.86233e-17
	KIF11	2059.83	483.679	0.252238	-1.98714	7.73394e-19	9.91601e-17
	TP73	2190.91	502.864	0.253456	-1.98019	8.91629e-19	1.13165e-16
	FBXO5	2359.53	589.271	0.270304	-1.88735	1.27387e-18	1.60062e-16
	C9orf169	125.623	746.389	5.03017	2.33061	1.32015e-18	1.64235e-16
	ZBED2	694.338	3189.64	4.22646	2.07945	1.48544e-18	1.82986e-16
	NUSAP1	9791.8	2145.8	0.245018	-2.02904	1.69338e-18	2.06576e-16
	MYBL2	16590.9	4407.13	0.285091	-1.81051	1.88447e-18	2.27676e-16
	UNC5B-AS1	22.8292	298.821	8.26841	3.04761	2.01113e-18	2.40665e-16
	EME1	1882.25	406.868	0.240028	-2.05873	2.35813e-18	2.79527e-16
	YPEL2	98.6748	630.964	5.2958	2.40485	2.56652e-18	3.01386e-16
	CCNB1	18644.1	4814.14	0.268637	-1.89627	2.66683e-18	3.10266e-16
	TRAIP	1635.09	339.019	0.232146	-2.10689	3.25772e-18	3.75535e-16
	KIF20A	2289.05	510.491	0.24722	-2.01613	3.48774e-18	3.98395e-16
	CDKN2C	929.418	183.083	0.224122	-2.15764	4.00339e-18	4.53177e-16
	UHRF1	1724.22	385.458	0.247577	-2.01405	4.10937e-18	4.6102e-16
	KIF23	4511.32	1134.74	0.268299	-1.89809	6.63069e-18	7.37298e-16
	DONSON	3467.97	921.246	0.286613	-1.80282	7.09819e-18	7.82358e-16
	SYTL1	285.184	1312.57	4.14515	2.05142	9.28433e-18	1.01441e-15
	MSH6	1729.35	419.503	0.2637	-1.92303	1.05085e-17	1.13827e-15
	RFC5	8029.17	2053.31	0.277895	-1.84739	1.07779e-17	1.15747e-15
	SKA3	4360.98	1162.63	0.284687	-1.81255	1.35883e-17	1.44692e-15
	POLA2	2931.78	656.676	0.252808	-1.98389	1.51457e-17	1.59921e-15
	TOP2A	2949.92	793.506	0.287832	-1.7967	1.67312e-17	1.75189e-15
	HMMR	1899.51	448.75	0.262137	-1.93161	1.99408e-17	2.07071e-15
	TMPO	11553.6	3226.44	0.300568	-1.73424	2.07207e-17	2.13406e-15
	APOBEC3C	1328.39	4735.84	3.39223	1.76223	2.25297e-17	2.30151e-15
	RACGAP1	4575.08	1167.92	0.277667	-1.84857	2.32495e-17	2.35589e-15
	SERPINB5	919.031	4810.72	4.59095	2.19879	2.46477e-17	2.47759e-15
	BIRC5	22392.6	6710.93	0.31751	-1.65513	3.27095e-17	3.26186e-15
	PTCHD4	15.4687	243.912	8.66893	3.11585	3.82195e-17	3.78133e-15
	UBE2T	11170.6	3386.33	0.320783	-1.64033	4.15268e-17	4.07644e-15
	PSRC1	5005.01	1456.82	0.309825	-1.69047	4.21294e-17	4.10353e-15
	DLGAP5	2286.41	567.922	0.271165	-1.88276	4.2592e-17	4.11669e-15
	C19orf82	102.177	608.456	4.98685	2.31813	4.53302e-17	4.34789e-15
	AURKB	7533.16	1818.4	0.262722	-1.92839	4.63367e-17	4.41076e-15
	FAM64A	2901.7	785.393	0.292265	-1.77465	4.88122e-17	4.61146e-15
	RAD51AP1	1630.25	347.738	0.238327	-2.06899	5.73133e-17	5.37419e-15
	SPAG5	5695.64	1462.61	0.278436	-1.84458	6.38747e-17	5.94508e-15
	STIL	1998.19	479.949	0.262424	-1.93003	6.58008e-17	6.07932e-15
	MXD4	1134.84	4288.96	3.44144	1.78301	7.8279e-17	7.17938e-15
	GMNN	5454.55	1614.38	0.313719	-1.67246	7.92999e-17	7.22031e-15
	TICRR	1486.78	367.435	0.270135	-1.88825	1.00966e-16	9.12691e-15
	TTK	1939.01	416.712	0.238262	-2.06938	1.2393e-16	1.11227e-14
	RRM2B	2314.08	8819.98	3.61738	1.85495	1.29851e-16	1.15715e-14
	WDHD1	1378.94	333.715	0.26748	-1.9025	1.65687e-16	1.4661e-14
	HSPA1B	6653.86	1908.8	0.314524	-1.66876	1.92544e-16	1.69183e-14
	TK1	36702.3	11465.1	0.33233	-1.58931	2.21373e-16	1.93163e-14
	CDCA2	1796.03	470.07	0.284573	-1.81313	2.70177e-16	2.34122e-14
	FANCG	4156	1207.06	0.312131	-1.67978	2.74384e-16	2.36139e-14
	FAM111B	421.979	59.2373	0.179335	-2.47927	3.08665e-16	2.63835e-14
	CCNB2	4585.31	1239.17	0.29196	-1.77616	3.61923e-16	3.07268e-14
	SPC25	3301.45	919.544	0.303035	-1.72244	3.90716e-16	3.29486e-14
	HELLS	1201.51	289.149	0.265742	-1.9119	4.1276e-16	3.45755e-14
	POLD1	3574.54	1033.84	0.307964	-1.69917	4.20654e-16	3.50034e-14
	H1FX	7382.73	2252.51	0.324052	-1.6257	4.23595e-16	3.50163e-14
	TUBB4B	57424.4	14041.6	0.268266	-1.89827	5.06728e-16	4.16146e-14
	DEPDC1	2778.49	790.813	0.306509	-1.706	5.28323e-16	4.31063e-14
	NUF2	1844.16	428.383	0.262824	-1.92783	5.58475e-16	4.52725e-14
	RFX5	1658.43	5405.08	3.07688	1.62147	5.64784e-16	4.54904e-14
	PLK4	2036.86	532.192	0.282601	-1.82316	5.87596e-16	4.70264e-14
	BAX	4965.14	16269.5	3.08408	1.62484	6.41048e-16	5.09795e-14
	INSIG1	3258.3	957.13	0.313442	-1.67373	6.65123e-16	5.25615e-14
	SORCS2	5.84563	165.504	9.85891	3.30143	9.3979e-16	7.38029e-14
	CMBL	4086.16	12762.4	2.97378	1.5723	9.57334e-16	7.47136e-14
	NEIL3	766.81	140.204	0.217026	-2.20406	9.83844e-16	7.63086e-14
	CENPO	4947.36	1527.84	0.327622	-1.60989	1.14365e-15	8.8159e-14
	KIF18B	1603.7	394.721	0.268636	-1.89628	1.61702e-15	1.23889e-13
	CD82	349.122	1398.64	3.64578	1.86623	2.34009e-15	1.78201e-13
	PLXNB3	53.946	389.167	5.52584	2.46619	3.699e-15	2.79988e-13
	ERCC6L	959.543	223.806	0.260776	-1.93912	4.52835e-15	3.40711e-13
	KIF22	5709.35	1488.28	0.286013	-1.80585	4.58007e-15	3.42551e-13
	PHLDA3	1927.37	5964.25	2.93014	1.55097	7.89618e-15	5.87074e-13
	TNFRSF10C	91.7029	648.648	5.61358	2.48892	8.13153e-15	6.01016e-13
	KIF4A	1490.59	399.519	0.291231	-1.77977	8.64246e-15	6.35044e-13
	BRCA1	2394.51	699.317	0.314012	-1.67111	1.16794e-14	8.48651e-13
	WEE1	2806.06	824.736	0.313443	-1.67373	1.16846e-14	8.48651e-13
	PBK	4783.35	1382.49	0.3103	-1.68827	1.43653e-14	1.03735e-12
	RPL23AP82	316.448	1391.82	3.89352	1.96108	1.6668e-14	1.19676e-12
	POLD3	1359.99	339.364	0.276505	-1.85462	2.78551e-14	1.98864e-12
	ECT2	4130.51	1286.98	0.333088	-1.58603	3.28668e-14	2.33317e-12
	NTPCR	1011.44	3294.24	3.04585	1.60684	3.57894e-14	2.52637e-12
	RFC3	4105.27	1296.86	0.335379	-1.57614	3.6003e-14	2.52725e-12
	DNMT1	7631.76	2586	0.356523	-1.48793	4.00111e-14	2.793e-12
	GINS1	2836.71	874.926	0.330061	-1.5992	4.73798e-14	3.2891e-12
	RFC2	8795.68	2998.2	0.35939	-1.47638	4.78139e-14	3.301e-12
	MSH2	2450.26	716.28	0.312092	-1.67996	5.06697e-14	3.47904e-12
	MAD2L1	10280.8	3560.33	0.363909	-1.45835	7.13228e-14	4.8705e-12
	BRIP1	676.932	145.046	0.247763	-2.01297	8.21417e-14	5.57897e-12
	MTFR2	1219.21	324.731	0.292629	-1.77285	1.05191e-13	7.10603e-12
	RNASEH2A	5429.52	1825.67	0.355833	-1.49073	1.06044e-13	7.12536e-12
	PROM2	184.015	798.24	3.81136	1.93031	1.25499e-13	8.38772e-12
	MELK	5771.42	1963.88	0.359519	-1.47586	1.48134e-13	9.8482e-12
	CDC25C	1554.44	287.781	0.242037	-2.0467	1.4929e-13	9.87282e-12
	CENPE	760.258	179.774	0.266277	-1.909	1.57438e-13	1.03571e-11
	FAM210B	683.308	2544.83	3.38446	1.75892	2.18819e-13	1.43201e-11
	ANKRA2	346.532	1236.04	3.27806	1.71284	2.27752e-13	1.48275e-11
	NCAPH2	15401.6	5506.23	0.373499	-1.42082	2.37372e-13	1.53741e-11
	H2AFX	25131.1	9067.27	0.377726	-1.40459	3.3401e-13	2.15222e-11
	KRTAP2-3	309.712	1158.26	3.51039	1.81163	3.55802e-13	2.28095e-11
	SUV39H1	2595.41	774.948	0.321682	-1.63629	3.68727e-13	2.3518e-11
	DNAJC9	6720.55	2334.48	0.365031	-1.45391	3.73554e-13	2.37056e-11
	CENPF	3708.11	1176.62	0.341448	-1.55026	3.95433e-13	2.49679e-11
	TRIAP1	3256.78	9766.36	2.85676	1.51438	4.3662e-13	2.74306e-11
	TUBA1B	61999	20194	0.351292	-1.50926	4.45958e-13	2.78779e-11
	MASTL	1539.55	438.834	0.307823	-1.69983	4.53604e-13	2.8112e-11
	SLC43A3	4815.54	1529.69	0.333779	-1.58304	4.54177e-13	2.8112e-11
	FIGNL1	1147.22	309.778	0.300988	-1.73222	4.69967e-13	2.89468e-11
	FANCA	4230.12	1452.19	0.362225	-1.46504	4.72314e-13	2.89494e-11
	CDCA4	5814.78	2022.05	0.365947	-1.4503	4.96697e-13	3.02961e-11
	FANCI	4717.8	1551.47	0.351076	-1.51014	5.5406e-13	3.36317e-11
	ACTA2	189.03	763.37	3.58796	1.84317	5.9363e-13	3.58604e-11
	UBE2S	7958.46	2807.53	0.372903	-1.42313	6.64889e-13	3.99729e-11
	TROAP	4599.82	1602.54	0.36683	-1.44682	6.84351e-13	4.0947e-11
	PRIM1	2777.25	823.816	0.317094	-1.65702	7.20196e-13	4.28875e-11
	XRCC3	2772.22	807.213	0.320664	-1.64087	8.05662e-13	4.77507e-11
	GATS	252.793	938.009	3.3566	1.747	8.85522e-13	5.22375e-11
	TIMELESS	4775.57	1599.46	0.359469	-1.47606	9.9589e-13	5.84736e-11
	HAT1	5666.23	1677.32	0.313525	-1.67335	1.0831e-12	6.32982e-11
	BLOC1S2	3062.97	9718.63	3.14219	1.65177	1.09022e-12	6.34198e-11
	SMC4	3609.19	1217.36	0.359668	-1.47526	1.11799e-12	6.47354e-11
	FOXM1	12562.4	4620.88	0.385286	-1.376	1.21377e-12	6.99585e-11
	SGOL2	1067.22	285.277	0.294473	-1.76379	1.3803e-12	7.91942e-11
	CCDC90B	1228.73	3838.49	2.95233	1.56185	1.47177e-12	8.36776e-11
	CCNG1	3613.95	10541.4	2.72241	1.44488	1.46985e-12	8.36776e-11
	SERPINH1	10925.1	3783.27	0.366119	-1.44962	1.5563e-12	8.80852e-11
	EZH2	4576.8	1596.71	0.368265	-1.44118	1.76919e-12	9.96857e-11
	ESPL1	2223.43	736.595	0.352184	-1.5056	1.84406e-12	1.0344e-10
	UBR7	5297.27	1833.31	0.369871	-1.43491	1.92929e-12	1.0774e-10
	USP1	3804.81	1336.08	0.370246	-1.43344	1.95742e-12	1.08828e-10
	NASP	13724	4237.3	0.334841	-1.57845	2.01483e-12	1.11526e-10
	ZNF219	430.242	1463.7	3.2388	1.69546	2.06465e-12	1.13782e-10
	NRM	1020.62	289.834	0.31148	-1.68279	2.18729e-12	1.20014e-10
	C2orf88	84.4135	447.519	4.43039	2.14743	2.25756e-12	1.23332e-10
	MND1	2094.91	653.359	0.332972	-1.58653	2.34694e-12	1.27659e-10
	KIAA1524	2100.03	696.656	0.353473	-1.50033	2.81007e-12	1.52192e-10
	TOPBP1	4749.65	1674.12	0.37129	-1.42938	3.19472e-12	1.72282e-10
	GPX1	7246.64	21732	2.8133	1.49226	3.33855e-12	1.79269e-10
	FAM111A	1723.66	556.687	0.345848	-1.53179	3.46526e-12	1.85281e-10
	DPYSL5	1313.57	386.071	0.323854	-1.62658	3.68406e-12	1.96145e-10
	ZWINT	14339.6	5424.29	0.395631	-1.33777	4.33829e-12	2.30003e-10
	CDCA7	4387.13	1439.71	0.358366	-1.48049	4.47855e-12	2.36441e-10
	MCM8	2202.71	745.913	0.359687	-1.47519	4.93714e-12	2.59562e-10
	LINC00657	4174.39	11217.8	2.58703	1.3713	5.94413e-12	3.112e-10
	IKBIP	964.836	3002.2	2.86595	1.51902	6.26707e-12	3.26746e-10
	KIF15	807.2	220.518	0.303111	-1.72208	6.78845e-12	3.52466e-10
	LRRC45	3150.37	1120.14	0.375349	-1.4137	7.50707e-12	3.88174e-10
	IL17RB	723.116	191.158	0.295846	-1.75708	7.81605e-12	4.02495e-10
	WDR62	1238.48	350.039	0.312184	-1.67953	8.08503e-12	4.14647e-10
	UBE2C	14977.8	5650.23	0.393487	-1.34561	8.45752e-12	4.31987e-10
	CDK1	13200	4683.53	0.377666	-1.40482	8.6967e-12	4.42405e-10
	NCAPG2	4322.14	1460.36	0.362995	-1.46198	9.4708e-12	4.79841e-10
	ARHGAP11A	5466.78	2032.53	0.390494	-1.35663	9.92803e-12	5.00987e-10
	PTGES	1607.66	4361.09	2.59513	1.37581	1.11627e-11	5.61039e-10
	MXD3	1089.29	327.679	0.328784	-1.60479	1.15226e-11	5.76818e-10
	GPRIN1	3034.93	1039.3	0.367289	-1.44501	1.28629e-11	6.41358e-10
	NCAPD3	3864.95	1396.23	0.38255	-1.38628	1.42281e-11	7.06623e-10
	PRKX	973.574	2768.52	2.67208	1.41796	1.52106e-11	7.52447e-10
	CHEK1	2912.86	1026.43	0.372586	-1.42436	1.53011e-11	7.53954e-10
	CENPM	2984.24	977.521	0.350079	-1.51425	1.61444e-11	7.92402e-10
	AUNIP	1318.58	417.337	0.342187	-1.54714	1.62991e-11	7.96881e-10
	GSG2	1101.87	339.167	0.334321	-1.58069	1.8165e-11	8.84666e-10
	RAB40B	419.308	1311.58	2.90976	1.5409	1.86862e-11	9.06532e-10
	GINS3	2536.2	891.805	0.373583	-1.4205	1.92677e-11	9.31149e-10
	LYNX1	90.4854	434.134	3.98933	1.99615	2.05768e-11	9.90604e-10
	GADD45A	2229.18	6027.62	2.54982	1.3504	2.10041e-11	1.00731e-09
	PIM1	1483.97	440.847	0.330048	-1.59925	2.3978e-11	1.14556e-09
	FAM83D	4379.05	1268.25	0.316929	-1.65777	2.45172e-11	1.16689e-09
	SLBP	16521.3	6339.17	0.402896	-1.31152	2.56427e-11	1.21585e-09
	PSIP1	5164.17	1863.07	0.383314	-1.3834	2.58027e-11	1.21884e-09
	INCENP	1944.11	603.341	0.327627	-1.60987	2.73151e-11	1.28544e-09
	C14orf80	3340.73	1225.51	0.387481	-1.3678	2.81712e-11	1.32079e-09
	PHF19	4970.56	1826.14	0.387163	-1.36899	2.93578e-11	1.3713e-09
	OAS3	2152.77	731.788	0.360456	-1.4721	3.22884e-11	1.50261e-09
	POLE	3971.93	1373.62	0.373145	-1.42219	3.37441e-11	1.56455e-09
	CES2	1910.07	5824.09	2.91571	1.54385	3.7147e-11	1.716e-09
	RRM1	5574.92	1984.11	0.377429	-1.40572	3.79472e-11	1.74655e-09
	HAUS8	2110.5	680.297	0.352218	-1.50546	3.81229e-11	1.74823e-09
	EPS8L2	3002.12	8079.79	2.5463	1.3484	3.93546e-11	1.79815e-09
	PARP2	3142.71	1130.24	0.378384	-1.40208	4.00402e-11	1.82284e-09
	PTPRE	325.784	1220.33	3.40997	1.76976	4.22389e-11	1.916e-09
	POLE2	1659.54	496.265	0.327383	-1.61095	4.36758e-11	1.97405e-09
	CENPQ	1463.67	445.576	0.331628	-1.59236	4.40056e-11	1.98183e-09
	RMI2	927.856	265.325	0.314035	-1.671	4.89392e-11	2.19615e-09
	LMNB2	44228.5	17420	0.412318	-1.27817	5.02427e-11	2.24662e-09
	MCMBP	17318.4	6327.81	0.381616	-1.38981	5.13673e-11	2.28876e-09
	CKAP2L	953.361	222.859	0.272293	-1.87677	5.24675e-11	2.32952e-09
	KANK2	1954.13	651.303	0.362498	-1.46396	6.15227e-11	2.72195e-09
	TAF5	1305.72	393.338	0.323329	-1.62892	6.51988e-11	2.87447e-09
	CENPA	1949.77	576.497	0.32604	-1.61688	6.79101e-11	2.98353e-09
	CBX2	3309.5	1226.23	0.389892	-1.35885	6.94228e-11	3.03936e-09
	ANKRD33B	788.773	2228.69	2.67029	1.417	7.04238e-11	3.07248e-09
	DHCR24	21048.6	7994.91	0.406021	-1.30037	9.3696e-11	4.07367e-09
	SGOL1	903.704	258.316	0.317153	-1.65675	1.02183e-10	4.42734e-09
	ARHGEF39	1587.93	541.754	0.366449	-1.44832	1.0537e-10	4.54974e-09
	RGS16	392.437	1192.57	2.81764	1.49449	1.26677e-10	5.43584e-09
	RPA1	13047.5	4252.44	0.364609	-1.45558	1.26757e-10	5.43584e-09
	TUBA1C	40944.3	15718.2	0.403475	-1.30945	1.296e-10	5.53884e-09
	CDK2	9184.16	3511.27	0.406273	-1.29948	1.31195e-10	5.588e-09
	RIBC2	314.085	54.404	0.224305	-2.15647	1.55595e-10	6.6049e-09
	DIAPH3	857.581	245.46	0.313895	-1.67165	1.65382e-10	6.99671e-09
	LOC101928100	127.856	524.739	3.55434	1.82958	1.85339e-10	7.81472e-09
	BLCAP	2219.85	6085.52	2.56034	1.35633	1.88338e-10	7.91461e-09
	KIF14	885.948	269.107	0.330887	-1.59559	1.90181e-10	7.96542e-09
	PEG10	865.387	215.655	0.28665	-1.80264	1.92649e-10	8.04199e-09
	TUBB	102443	34547.5	0.374256	-1.4179	2.19626e-10	9.13775e-09
	EPN3	1048.87	2766.62	2.54216	1.34605	2.39145e-10	9.91702e-09
	CARHSP1	6379.69	2513.44	0.4109	-1.28314	2.55377e-10	1.05553e-08
	ACER2	47.22	279.839	4.44117	2.15094	2.60741e-10	1.07417e-08
	PASK	1058.25	343.03	0.350809	-1.51124	2.67121e-10	1.09686e-08
	PLK3	1509.6	3937.21	2.47148	1.30538	2.73593e-10	1.11252e-08
	TMEM63B	4162.67	10223.1	2.3663	1.24263	2.7233e-10	1.11252e-08
	TONSL	2930.27	1095.16	0.398009	-1.32913	2.73542e-10	1.11252e-08
	MYB	321.864	57.3116	0.233312	-2.09967	2.76864e-10	1.12219e-08
	EXOSC9	7414.22	2775.91	0.383803	-1.38156	2.97353e-10	1.20136e-08
	ATF3	1130.2	3155.34	2.63176	1.39603	3.3576e-10	1.34787e-08
	MMS22L	1720	573.24	0.36485	-1.45463	3.34701e-10	1.34787e-08
	RBL1	899.004	281.835	0.341738	-1.54904	3.415e-10	1.36654e-08
	DEPDC1B	3588.51	1409.12	0.411935	-1.27951	3.55566e-10	1.41793e-08
	RFC1	4116.08	1517.62	0.388078	-1.36558	3.56597e-10	1.41793e-08
	BIRC3	99.5083	469.623	3.95749	1.98458	3.66708e-10	1.45353e-08
	KPNA2	15867.8	5114.8	0.347636	-1.52435	3.8925e-10	1.53803e-08
	TRIM28	57518.2	22554.6	0.417142	-1.26139	3.96413e-10	1.56142e-08
	MYBL1	688.601	192.767	0.317506	-1.65515	3.98291e-10	1.56391e-08
	LACC1	98.1558	427.218	3.69033	1.88375	4.01521e-10	1.57169e-08
	PRIM2	1609.05	488.535	0.337803	-1.56575	4.13243e-10	1.61255e-08
	ARL6IP1	15644.3	6569.92	0.436212	-1.1969	5.50287e-10	2.14067e-08
	FAM222A	1116.45	376.07	0.34865	-1.52015	5.52264e-10	2.14173e-08
	SCARA3	3562.23	1369.85	0.408712	-1.29084	5.66055e-10	2.18846e-08
	ACAT2	2762.09	1021.76	0.389959	-1.35861	6.60788e-10	2.54687e-08
	DGKA	512.603	1660.91	2.91735	1.54466	6.67724e-10	2.56573e-08
	GALNT5	1911.85	4741.38	2.36083	1.2393	6.74554e-10	2.58408e-08
	SUN2	2560.35	847.404	0.362287	-1.46479	7.80052e-10	2.97913e-08
	KLHL30	4.77094	111.384	6.47087	2.69396	8.50399e-10	3.22818e-08
	LIF	2031.6	5316.97	2.48819	1.3151	8.49102e-10	3.22818e-08
	LBR	4923.2	1886.31	0.408721	-1.29081	8.81329e-10	3.33551e-08
	RAD21	16920.1	6336.03	0.397275	-1.33179	9.01699e-10	3.40236e-08
	NINJ1	1904.94	5279.37	2.65124	1.40667	9.21365e-10	3.46615e-08
	PLCD3	4177.01	10029.9	2.31261	1.20952	9.99074e-10	3.74727e-08
	SHMT1	3241.58	1185.76	0.391702	-1.35217	1.00232e-09	3.74825e-08
	BCL2L1	10228.7	26562.7	2.49611	1.31968	1.06594e-09	3.97435e-08
	MXI1	1511.68	3916.05	2.46372	1.30084	1.11491e-09	4.14464e-08
	STIP1	33733.2	13424.7	0.410205	-1.28558	1.18259e-09	4.38327e-08
	MTURN	435.798	1252	2.6602	1.41154	1.18749e-09	4.38848e-08
	TGFBR2	1241.51	3174.88	2.44406	1.28928	1.20372e-09	4.43539e-08
	KIAA1324	58.2916	340.183	4.3569	2.1233	1.37276e-09	5.04348e-08
	C12orf5	1410.87	3668.53	2.44982	1.29268	1.40841e-09	5.15938e-08
	SF3A2	11445.9	4263.47	0.403506	-1.30934	1.45594e-09	5.318e-08
	LRP1	212.983	697.257	2.9578	1.56452	1.47475e-09	5.37109e-08
	PVT1	2565.23	6822.72	2.56312	1.3579	1.50445e-09	5.46342e-08
	DUT	8161.6	3449.35	0.438399	-1.18968	1.6247e-09	5.88309e-08
	ZNF469	121.391	460.439	3.28716	1.71684	1.74147e-09	6.28779e-08
	DPYSL2	782.161	240.214	0.343835	-1.54021	1.86546e-09	6.71618e-08
	CDC7	1402.61	445.076	0.349904	-1.51497	1.9955e-09	7.16386e-08
	C16orf52	461.202	1283.36	2.59719	1.37695	2.35166e-09	8.41613e-08
	KANK3	496.152	1406.97	2.67997	1.42222	2.35772e-09	8.41613e-08
	TGFA	2891.08	7378.69	2.3698	1.24476	2.49258e-09	8.87231e-08
	RFWD3	5466.5	2304.94	0.439479	-1.18614	2.53958e-09	9.01408e-08
	KDM5B	373.99	1062.87	2.64005	1.40056	2.70462e-09	9.57284e-08
	KIAA0247	477.627	1303.5	2.55471	1.35316	2.75062e-09	9.70829e-08
	NIPAL3	781.074	2014.48	2.42977	1.28082	2.77004e-09	9.74947e-08
	EBP	8877.74	3805.44	0.445697	-1.16587	2.8878e-09	1.01355e-07
	TMEM150A	244.019	816.368	2.96944	1.57019	2.99022e-09	1.04658e-07
	SNHG8	1542.75	3795.51	2.45359	1.2949	3.10613e-09	1.08413e-07
	H2AFZ	32052.8	13337.1	0.431274	-1.21332	3.26445e-09	1.13309e-07
	TTYH3	3498.34	8169.86	2.23662	1.16132	3.25767e-09	1.13309e-07
	C1orf112	696.569	208.571	0.333911	-1.58247	4.00727e-09	1.38709e-07
	ADAP2	838.58	2169.76	2.44425	1.28939	4.07791e-09	1.40766e-07
	ABCA1	12.1634	132.095	5.36057	2.42239	4.17318e-09	1.4366e-07
	CCND3	6440.03	2765.36	0.447385	-1.16041	4.26152e-09	1.46301e-07
	IQCC	1102.2	387.056	0.376759	-1.40828	4.28273e-09	1.46628e-07
	KRT15	1450.85	3881.53	2.51434	1.33018	4.32365e-09	1.47627e-07
	TNFRSF10B	5042.26	11695.5	2.23522	1.16041	4.37183e-09	1.48867e-07
	ACSL3	4707.84	1848.98	0.414095	-1.27197	4.70558e-09	1.59799e-07
	ORAI3	186.214	627.293	3.00173	1.58579	4.7424e-09	1.60615e-07
	CWF19L1	3183.43	1283.08	0.425785	-1.2318	4.7784e-09	1.614e-07
	MAP1S	2023.02	784.771	0.404997	-1.30402	4.83614e-09	1.62912e-07
	LMF2	1647.6	618.782	0.398051	-1.32898	4.899e-09	1.64588e-07
	ZNF33B	508.206	1367.46	2.53115	1.33979	5.24389e-09	1.75705e-07
	WNT16	1570.95	3775.51	2.32638	1.21809	5.3769e-09	1.79683e-07
	ARL6IP6	2160.18	830.426	0.40704	-1.29676	5.63093e-09	1.87673e-07
	SMC1A	5472.13	2330.31	0.446353	-1.16374	5.67281e-09	1.88568e-07
	ZGRF1	370.36	86.0618	0.277334	-1.8503	5.95803e-09	1.97527e-07
	FAM222A-AS1	188.712	840.044	3.87467	1.95407	6.01448e-09	1.98874e-07
	HMCN2	3.56591	87.7174	6.01759	2.58919	6.88521e-09	2.27067e-07
	TIPIN	2871.33	1181.56	0.432626	-1.20881	6.92838e-09	2.27893e-07
	CIT	1167.54	428.421	0.392734	-1.34838	7.22572e-09	2.36435e-07
	RALGDS	1746.63	4449.07	2.42005	1.27504	7.20811e-09	2.36435e-07
	HSP90AA1	89760	36630.1	0.429623	-1.21886	7.34746e-09	2.39794e-07
	CKAP2	3550.94	1467.98	0.43186	-1.21136	7.40117e-09	2.40922e-07
	HIRIP3	2815.58	1142.34	0.42817	-1.22375	7.48333e-09	2.42967e-07
	NOP14-AS1	440.2	1187.38	2.53255	1.34059	7.51889e-09	2.43492e-07
	TM7SF3	4011.82	9302.18	2.22453	1.1535	8.43713e-09	2.72526e-07
	TUBA4A	7333.02	2920.8	0.413214	-1.27504	8.46739e-09	2.72802e-07
	TMEM249	103.478	395.947	3.26305	1.70622	8.56707e-09	2.75307e-07
	SMC2	676.396	220.773	0.359008	-1.47791	8.74598e-09	2.8034e-07
	CEACAM1	31.9628	209.744	4.42988	2.14727	9.17368e-09	2.93301e-07
	TCOF1	12064.7	5377.56	0.462619	-1.1121	9.26254e-09	2.9539e-07
	NUP85	10631.2	3899.54	0.398524	-1.32726	9.40065e-09	2.99036e-07
	DDX11	1374.65	509.115	0.398951	-1.32571	9.60651e-09	3.04045e-07
	HAUS1	3794.92	1607.32	0.445189	-1.16751	9.59141e-09	3.04045e-07
	SASS6	683.547	210.323	0.337809	-1.56572	1.13522e-08	3.58393e-07
	S100A2	1268.55	3088.65	2.35454	1.23545	1.16857e-08	3.67997e-07
	PRR11	5229.9	2286.1	0.455473	-1.13456	1.22936e-08	3.86171e-07
	C10orf32	752.851	1898.64	2.38973	1.25685	1.29047e-08	4.04356e-07
	ACD	3661.41	1573.14	0.448826	-1.15577	1.30839e-08	4.08952e-07
	MDC1	2884.21	1219.45	0.442675	-1.17568	1.31703e-08	4.1047e-07
	PTBP1	26798.7	10905.5	0.419933	-1.25177	1.31978e-08	4.1047e-07
	MALAT1	2185.61	896.545	0.429054	-1.22077	1.33242e-08	4.13381e-07
	TINAGL1	2004.14	4595.26	2.20318	1.13958	1.38286e-08	4.2797e-07
	KIAA0040	1913.2	4406.06	2.20622	1.14158	1.40704e-08	4.34383e-07
	PTP4A1	11739.1	27555.3	2.32132	1.21494	1.44259e-08	4.44267e-07
	C17orf53	1127.67	386.847	0.372863	-1.42328	1.44668e-08	4.44439e-07
	EMP2	3289.16	1406.8	0.447669	-1.1595	1.51648e-08	4.64745e-07
	ATAD5	490.791	135.673	0.320811	-1.6402	1.63764e-08	5.00656e-07
	GPSM2	2728.18	1138.82	0.438494	-1.18937	1.65303e-08	5.04134e-07
	C16orf59	2350.46	948.064	0.420451	-1.24999	1.6765e-08	5.10055e-07
	KNTC1	867.215	303.164	0.383084	-1.38427	1.78224e-08	5.40915e-07
	HHAT	123.23	443.211	3.1052	1.63469	1.91054e-08	5.78455e-07
	RECQL4	9268.7	3983.99	0.450999	-1.1488	2.03008e-08	6.13171e-07
	RAD18	2190.98	846.382	0.407241	-1.29604	2.06065e-08	6.20914e-07
	AMZ2	6049.68	13818	2.19943	1.13713	2.08336e-08	6.26253e-07
	SRSF2	18703.3	8569.43	0.474202	-1.07643	2.09786e-08	6.27712e-07
	ZNF621	701.809	1829.58	2.47872	1.3096	2.0982e-08	6.27712e-07
	HMGB1	15964.8	7038.15	0.466031	-1.1015	2.16042e-08	6.44791e-07
	POLA1	1169.61	416.451	0.382495	-1.38649	2.26937e-08	6.75704e-07
	SAMD1	3080.87	1340.49	0.448198	-1.15779	2.32422e-08	6.90398e-07
	OR51B5	1300.52	3183.24	2.37931	1.25054	2.46376e-08	7.30122e-07
	COL17A1	26.4122	189.676	4.60758	2.20401	2.72191e-08	8.04726e-07
	KIF20B	978.504	365.753	0.399563	-1.32351	2.78721e-08	8.20172e-07
	MARCH8	761.773	1912.96	2.36908	1.24433	2.78237e-08	8.20172e-07
	SRRT	8489.21	3709.52	0.453451	-1.14098	2.81314e-08	8.24651e-07
	WRAP53	2928.29	1099.18	0.404778	-1.3048	2.81556e-08	8.24651e-07
	LIG1	4554.54	1857.54	0.432462	-1.20936	2.8247e-08	8.25402e-07
	BCL2L12	3445.48	1478.3	0.448702	-1.15617	2.92581e-08	8.52966e-07
	SPDL1	1357.24	537.51	0.420527	-1.24973	2.94192e-08	8.55677e-07
	PIF1	552.89	173.634	0.350432	-1.51279	3.16082e-08	9.17222e-07
	FUS	28191.3	10582	0.390081	-1.35815	3.17952e-08	9.18406e-07
	MIS18A	3661.52	1611.43	0.458981	-1.12349	3.1755e-08	9.18406e-07
	ARHGAP19	2668.77	1019.04	0.407968	-1.29347	3.23519e-08	9.32342e-07
	SERPINE1	741.381	1796.85	2.30075	1.2021	3.28282e-08	9.43906e-07
	MTBP	624.638	208.016	0.364559	-1.45577	3.30723e-08	9.48752e-07
	NRF1	1800.93	735.285	0.428146	-1.22382	3.32965e-08	9.53008e-07
	PRPS2	5437.25	2365.51	0.455289	-1.13514	3.4023e-08	9.71588e-07
	POC1A	3037.56	1273.61	0.445189	-1.16751	3.46158e-08	9.86275e-07
	GABARAPL1	1659.24	3760.68	2.17174	1.11885	3.52845e-08	1.00305e-06
	ISCU	7086.55	16871.9	2.23826	1.16238	3.68454e-08	1.04506e-06
	FN3KRP	4353.72	1945.49	0.464344	-1.10674	3.74257e-08	1.05913e-06
	SAFB	6637.31	2926.17	0.454695	-1.13703	3.84995e-08	1.08707e-06
	SMC3	3237.79	1424.61	0.457831	-1.12711	4.27841e-08	1.20534e-06
	SSRP1	33487.8	14068.9	0.445297	-1.16716	4.35022e-08	1.22283e-06
	POLH	1686.45	3870.59	2.21425	1.14682	4.39842e-08	1.23362e-06
	HNRNPM	13890.6	5467.17	0.41463	-1.2701	4.52737e-08	1.26696e-06
	S100A6	49940.6	121349	2.27196	1.18394	4.59374e-08	1.28267e-06
	JADE1	1997.97	847.32	0.44255	-1.17609	4.72066e-08	1.31519e-06
	VRK1	3726.2	1460.15	0.404694	-1.3051	4.74925e-08	1.32023e-06
	KIAA0101	5168.95	2026.98	0.427483	-1.22606	4.78245e-08	1.32652e-06
	CENPJ	914.458	342.408	0.401844	-1.31529	4.8451e-08	1.34094e-06
	CDKN3	3632.38	1435.82	0.420068	-1.2513	4.93938e-08	1.36403e-06
	ZNF561	896.343	2100.92	2.23766	1.16199	4.9719e-08	1.37e-06
	AATK	150.67	514.753	3.05232	1.60991	4.99405e-08	1.3728e-06
	RBBP7	8957.65	3892.67	0.447912	-1.15871	5.00392e-08	1.3728e-06
	TTI1	2533.08	1048.47	0.429616	-1.21888	5.16547e-08	1.41403e-06
	XRCC1	2213.11	861.512	0.417142	-1.26139	5.29471e-08	1.44626e-06
	PGPEP1	1115.78	2624.21	2.21746	1.14891	5.62554e-08	1.5333e-06
	TLR3	52.35	249.082	3.63319	1.86124	5.67169e-08	1.54253e-06
	CTSV	853.877	288.556	0.370951	-1.4307	5.78147e-08	1.56899e-06
	POLQ	1030.97	393.321	0.403389	-1.30976	5.83604e-08	1.57699e-06
	RNF157-AS1	1.88871	73.8099	5.57782	2.4797	5.82674e-08	1.57699e-06
	DEPTOR	82.1314	319.247	3.23802	1.69511	6.13263e-08	1.65357e-06
	FANCD2	1334.05	540.383	0.429544	-1.21912	6.43439e-08	1.73122e-06
	TRIM2	654.019	1573.31	2.28517	1.1923	6.85962e-08	1.84169e-06
	MORN4	118.41	407.324	2.98254	1.57654	7.19244e-08	1.92693e-06
	TRIP13	6007.78	2707.55	0.47254	-1.08149	7.40362e-08	1.97929e-06
	KIF24	363.393	101.288	0.326783	-1.61359	7.84508e-08	2.09286e-06
	FAM83H-AS1	1024.94	2429.66	2.24154	1.16449	8.4471e-08	2.24868e-06
	CDIP1	263.818	760.39	2.61028	1.3842	8.59027e-08	2.28196e-06
	PSTPIP2	1682.71	4245.76	2.34945	1.23232	8.6286e-08	2.28731e-06
	PRKAB2	577.101	1406.59	2.29646	1.19941	9.52596e-08	2.51987e-06
	RAD54B	813.947	252.71	0.351928	-1.50665	9.77153e-08	2.5794e-06
	SRSF4	5472.09	2219.87	0.435666	-1.19871	9.92377e-08	2.61409e-06
	PHPT1	3573.7	7683.91	2.13968	1.0974	1.0085e-07	2.651e-06
	PANK1	410.249	1041.23	2.37768	1.24955	1.01923e-07	2.67362e-06
	ARAP1	2520.41	5460.73	2.08803	1.06214	1.06906e-07	2.79218e-06
	ELK3	748.598	1909.24	2.47733	1.30879	1.07109e-07	2.79218e-06
	TRAK1	1824.68	4133.96	2.15648	1.10868	1.07031e-07	2.79218e-06
	CENPL	814.45	305.627	0.404981	-1.30407	1.07434e-07	2.79484e-06
	C15orf52	223.973	641.055	2.60654	1.38214	1.14027e-07	2.96023e-06
	ZNF37A	977.321	2285.18	2.24851	1.16897	1.16619e-07	3.02126e-06
	PLXNB1	498.821	1240.24	2.35795	1.23753	1.20253e-07	3.10901e-06
	ESAM	618.358	217.079	0.382579	-1.38617	1.21851e-07	3.14115e-06
	RAB37	254.741	702.186	2.55626	1.35403	1.21996e-07	3.14115e-06
	EI24	14589	33228.2	2.18317	1.12643	1.2586e-07	3.23402e-06
	WDR63	24.9614	170.572	4.22851	2.08015	1.29189e-07	3.31278e-06
	RBM14	6990.61	3051.63	0.457357	-1.12861	1.30756e-07	3.34614e-06
	PHF13	2889.92	1153.89	0.430829	-1.21481	1.33998e-07	3.42211e-06
	CEBPZOS	1801.65	4371.37	2.28876	1.19456	1.35458e-07	3.45241e-06
	PNRC1	588.468	1432.5	2.2861	1.19289	1.43293e-07	3.64469e-06
	MYEOV	7828.3	17430.6	2.13318	1.09301	1.43968e-07	3.65445e-06
	DHFR	1953.46	852.702	0.457836	-1.1271	1.44692e-07	3.66544e-06
	KNSTRN	6203.72	2916.59	0.486834	-1.0385	1.49678e-07	3.78412e-06
	TMEM201	4308.41	1985.1	0.476959	-1.06806	1.50192e-07	3.78949e-06
	ATAD3B	6287.92	2926.69	0.482478	-1.05146	1.55566e-07	3.91722e-06
	SMIM3	3194.88	7366.31	2.23655	1.16128	1.57587e-07	3.96015e-06
	PORCN	454.651	1125.89	2.32142	1.21501	1.59507e-07	4.00041e-06
	ABLIM1	7437.59	15880.3	2.05358	1.03814	1.64121e-07	4.09975e-06
	EPB41L4A-AS1	466.788	1179.96	2.55271	1.35203	1.63805e-07	4.09975e-06
	DCAF15	2576.57	1125.24	0.458849	-1.12391	1.70844e-07	4.25923e-06
	WHSC1	7924.03	3693.3	0.484403	-1.04572	1.71519e-07	4.26758e-06
	SHPK	2713.62	1088.2	0.431978	-1.21097	1.75146e-07	4.34923e-06
	DHRS2	932.165	362.305	0.418184	-1.25779	1.78058e-07	4.40549e-06
	SUPT16H	8688.65	4072.48	0.486809	-1.03857	1.78113e-07	4.40549e-06
	DMBX1	337.035	93.8142	0.329326	-1.60241	1.78835e-07	4.41465e-06
	RGS20	134.223	441.799	2.90389	1.53799	1.83281e-07	4.51553e-06
	OR51B4	291.435	876.355	2.65972	1.41127	1.8485e-07	4.54529e-06
	RMI1	1605.16	691.712	0.453278	-1.14153	1.91745e-07	4.70562e-06
	YPEL5	444.538	1100.45	2.33814	1.22536	2.00703e-07	4.91585e-06
	POMGNT1	6629.6	14456.2	2.06268	1.04452	2.03396e-07	4.97213e-06
	DEK	9212.96	4359.87	0.490283	-1.02831	2.0449e-07	4.98915e-06
	IDS	1143.96	2536.12	2.12009	1.08413	2.10545e-07	5.12694e-06
	TRAF4	6072.32	13604.3	2.14622	1.1018	2.11807e-07	5.14769e-06
	CENPK	701.819	239.68	0.376968	-1.40749	2.44348e-07	5.92709e-06
	DNAJA1	23618.1	10710.4	0.4719	-1.08345	2.4761e-07	5.99464e-06
	LHX2	796.429	291.411	0.401927	-1.31499	2.53118e-07	6.1162e-06
	ARRDC4	678.503	1568.73	2.19482	1.1341	2.57806e-07	6.21752e-06
	PLEKHA8	610.077	1435.01	2.2268	1.15497	2.60153e-07	6.26211e-06
	PTRF	13869.7	6432.7	0.484764	-1.04464	2.62981e-07	6.31808e-06
	DBF4	2286.03	1031.22	0.471556	-1.0845	2.63644e-07	6.32193e-06
	TMEM125	629.016	1537.74	2.28883	1.19461	2.65938e-07	6.36478e-06
	NUDT16P1	91.8676	326.543	3.01948	1.5943	2.69528e-07	6.43845e-06
	ALDH1A3	16954.6	34616.6	1.97668	0.983078	2.72219e-07	6.49039e-06
	PAQR4	5450.23	2540.14	0.470606	-1.08741	2.79967e-07	6.66247e-06
	RAB17	1444.43	3148.93	2.09308	1.06563	2.82153e-07	6.70179e-06
	IMPA2	1331.41	483.252	0.40549	-1.30226	2.85998e-07	6.78031e-06
	SATB1	61.7123	252.661	3.27127	1.70985	3.05508e-07	7.22921e-06
	CLU	8663.47	3818.11	0.46929	-1.09145	3.07859e-07	7.2679e-06
	FAM86JP	261.265	717.912	2.54495	1.34764	3.083e-07	7.2679e-06
	MICALL1	1745.09	3723.2	2.05257	1.03743	3.09831e-07	7.29031e-06
	SFN	21461.6	44318.3	1.9827	0.987463	3.23161e-07	7.58974e-06
	SRR	398.317	125.007	0.357454	-1.48417	3.2653e-07	7.65457e-06
	RANGAP1	13136	6200.6	0.48863	-1.03318	3.2779e-07	7.66979e-06
	DNA2	526.923	179.446	0.373585	-1.42049	3.31227e-07	7.73582e-06
	HNRNPA2B1	103694	43983.7	0.454112	-1.13888	3.37483e-07	7.86729e-06
	BORA	2117.57	954.156	0.471304	-1.08527	3.43584e-07	7.9947e-06
	NUP62	8805.44	4179.84	0.487556	-1.03636	3.46866e-07	8.05614e-06
	FYN	503.617	1258.27	2.3078	1.20652	3.55232e-07	8.23523e-06
	C17orf89	3694.39	7930.34	2.11657	1.08173	3.76227e-07	8.70588e-06
	TNFRSF6B	152.736	551.792	2.98081	1.5757	3.81114e-07	8.80276e-06
	HNRNPAB	40126.6	19783.2	0.50987	-0.971798	3.8408e-07	8.85402e-06
	PFKP	19289.9	8186.81	0.450952	-1.14895	3.84743e-07	8.85402e-06
	ASCC3	2097.56	4422.03	2.02626	1.01882	3.87949e-07	8.91148e-06
	DGKG	809.994	1819.47	2.13705	1.09562	4.10566e-07	9.40671e-06
	RPL23AP53	174.523	538.588	2.72141	1.44436	4.11006e-07	9.40671e-06
	TMEM263	1508.25	3262.02	2.06699	1.04753	4.20877e-07	9.61513e-06
	SPC24	857.118	325.056	0.402912	-1.31146	4.30094e-07	9.80785e-06
	RASGEF1A	1300.47	2805.62	2.07393	1.05237	4.32036e-07	9.8343e-06
	EFCAB10	46.733	214.16	3.48792	1.80237	4.35302e-07	9.87287e-06
	RPA2	11369.3	5516.72	0.504484	-0.987121	4.35086e-07	9.87287e-06
	ATAD3A	5846.28	2778.53	0.491817	-1.02381	4.39191e-07	9.94312e-06
	ANP32E	12315.6	6063.75	0.509017	-0.974216	4.70562e-07	1.06342e-05
	FHL2	6513.78	13186.5	1.96024	0.971027	4.94681e-07	1.11592e-05
	TRAF2	2656.21	1236.08	0.483971	-1.04701	5.07088e-07	1.14186e-05
	SSH1	4713.07	9718.81	1.98872	0.991839	5.08381e-07	1.14272e-05
	SLC1A5	14406.9	7038.64	0.504607	-0.986767	5.16645e-07	1.15922e-05
	TMEM129	1832.42	3886.26	2.02939	1.02105	5.31081e-07	1.18949e-05
	UST	373.333	915.184	2.30396	1.20412	5.38028e-07	1.2029e-05
	FXYD3	366.127	917.839	2.34886	1.23196	5.39079e-07	1.20311e-05
	KHSRP	13971.1	6764.36	0.501134	-0.99673	5.45009e-07	1.21419e-05
	MBOAT1	586.872	215.777	0.401827	-1.31535	5.56048e-07	1.2364e-05
	PHYHIP	42.8229	207.903	3.61396	1.85358	5.56947e-07	1.2364e-05
	CNP	8090.84	3579.66	0.475459	-1.07261	5.67375e-07	1.25733e-05
	RAVER1	6753.55	3154.34	0.491096	-1.02592	5.73309e-07	1.26825e-05
	C18orf54	676.669	255.548	0.41161	-1.28065	5.75288e-07	1.27039e-05
	LOC100506860	218.002	617.112	2.62003	1.38958	6.09546e-07	1.34367e-05
	TSC22D1	19750.5	39440.8	1.93486	0.952227	6.15604e-07	1.35465e-05
	TOB1	2683.88	5522.83	1.98638	0.990141	6.35567e-07	1.39614e-05
	CDK5RAP2	2167.7	998.945	0.481825	-1.05342	6.46883e-07	1.41851e-05
	CDNF	20.0773	167.99	4.21079	2.07409	6.52196e-07	1.42767e-05
	OTUD6B-AS1	820.504	1881.33	2.23705	1.1616	6.55842e-07	1.43316e-05
	CBS	4.90127	93.4163	4.74303	2.24581	6.99623e-07	1.52618e-05
	GJB4	22.0471	137.59	3.91284	1.96822	7.08456e-07	1.54276e-05
	TMPO-AS1	269.629	71.2742	0.323134	-1.6298	7.13088e-07	1.55016e-05
	SCN2A	5.50378	78.8873	4.6637	2.22147	7.21654e-07	1.56608e-05
	ALYREF	39151.5	19491.1	0.514007	-0.96014	7.30034e-07	1.58153e-05
	LINC00086	14.7038	122.957	4.24953	2.0873	7.72252e-07	1.67011e-05
	USP46	1965.52	4065.32	2.00592	1.00426	7.7802e-07	1.67969e-05
	DDX39A	12867.7	6077.53	0.4908	-1.02679	8.05459e-07	1.73595e-05
	LTBP2	88.8574	307.181	2.93636	1.55403	8.15968e-07	1.75559e-05
	KIF18A	991.797	375.144	0.405563	-1.302	8.34854e-07	1.79315e-05
	DIAPH1	9755.67	4667.19	0.500392	-0.998869	8.5303e-07	1.82907e-05
	KDM6B	1191.98	2697.64	2.17418	1.12047	8.61805e-07	1.84473e-05
	MIR1204	38.9323	188.305	3.50931	1.81119	8.66107e-07	1.85079e-05
	C1orf116	140.944	429.655	2.70296	1.43454	8.80883e-07	1.87598e-05
	NLRP1	45.7223	201.725	3.35722	1.74727	8.79581e-07	1.87598e-05
	DCUN1D3	430.816	1018.24	2.22391	1.1531	9.03969e-07	1.91864e-05
	HSPH1	7382.81	3622.33	0.507128	-0.979578	9.02768e-07	1.91864e-05
	IQGAP3	540.594	197.074	0.398735	-1.3265	9.20653e-07	1.95076e-05
	NET1	4705.43	2139.83	0.485461	-1.04257	9.5253e-07	2.01491e-05
	PTTG1	7118.46	3527.68	0.509936	-0.971613	9.59795e-07	2.02686e-05
	PEAR1	131.717	429.362	2.89462	1.53337	9.64155e-07	2.03265e-05
	C6orf120	939.576	2084.93	2.1383	1.09647	9.80178e-07	2.05952e-05
	USP37	1068.88	440.379	0.437736	-1.19187	9.79739e-07	2.05952e-05
	SF3B2	23075.6	10517.4	0.478761	-1.06262	1.0052e-06	2.10858e-05
	DNAJB1	18249	9181.14	0.521168	-0.94018	1.00847e-06	2.1119e-05
	HMGCS1	3065.45	1428.21	0.477494	-1.06645	1.02882e-06	2.14864e-05
	ITPKC	1133.14	2430.6	2.04435	1.03164	1.02943e-06	2.14864e-05
	LOC100506710	1255.86	2862.64	2.2289	1.15633	1.04714e-06	2.18197e-05
	CCHCR1	2248.15	1050.36	0.486938	-1.03819	1.05745e-06	2.19981e-05
	EHF	2742.64	5982.39	2.08695	1.0614	1.06557e-06	2.21305e-05
	XRCC2	544.806	196.662	0.401937	-1.31496	1.09476e-06	2.26991e-05
	NMU	5351.01	2638.43	0.509173	-0.973773	1.09964e-06	2.27627e-05
	PPIG	4282.21	2056	0.493243	-1.01963	1.11006e-06	2.29407e-05
	TMEM194A	1236.46	529.125	0.454548	-1.1375	1.13896e-06	2.34992e-05
	PHGDH	3346.57	1495.07	0.453536	-1.14071	1.15074e-06	2.37033e-05
	FAM214A	105.398	352.548	2.87461	1.52337	1.1695e-06	2.40504e-05
	IDI1	3498.41	1686.31	0.497977	-1.00585	1.17157e-06	2.40536e-05
	TCAIM	696.933	1546.85	2.11304	1.07932	1.27227e-06	2.60785e-05
	TELO2	2947.16	1307.26	0.467461	-1.09708	1.27603e-06	2.61129e-05
	KDM4B	789.191	1807.32	2.14221	1.0991	1.28867e-06	2.63286e-05
	PPM1G	27703.4	13441.3	0.507818	-0.977618	1.32943e-06	2.71174e-05
	BTN3A1	176.392	501.13	2.56796	1.36062	1.36516e-06	2.7801e-05
	ASPM	732.641	295.516	0.432651	-1.20872	1.39962e-06	2.84566e-05
	FBXO22	3870.53	7764.55	1.94316	0.958403	1.41221e-06	2.86662e-05
	TAB3	645.643	1511.33	2.19987	1.13742	1.43896e-06	2.91622e-05
	HAUS5	1825.11	834.943	0.480153	-1.05843	1.50563e-06	3.04641e-05
	SYT13	140.706	455.463	2.86858	1.52034	1.51979e-06	3.06604e-05
	UBA6-AS1	381.338	966.37	2.36646	1.24273	1.52021e-06	3.06604e-05
	MPP1	677.222	253.883	0.411609	-1.28065	1.53912e-06	3.09921e-05
	PCGF3	1718.22	3723.84	2.08107	1.05732	1.56602e-06	3.14834e-05
	MARVELD1	3998.68	8188.8	1.95143	0.96453	1.59439e-06	3.20024e-05
	C11orf82	2167.51	1027.95	0.494063	-1.01723	1.59921e-06	3.20479e-05
	REV3L	949.416	2012.44	2.03139	1.02247	1.6227e-06	3.2467e-05
	PLCXD2	27.8608	148.497	3.61751	1.855	1.63243e-06	3.26097e-05
	ZNF79	396.007	947.98	2.25361	1.17224	1.67098e-06	3.33268e-05
	AREG	1275.29	2811.25	2.06571	1.04664	1.69662e-06	3.37845e-05
	ALDOC	3189.2	1555.19	0.497697	-1.00666	1.70411e-06	3.38799e-05
	BLACAT1	42.3679	188.552	3.3333	1.73695	1.75813e-06	3.48987e-05
	BIK	1222.38	2615.02	2.02676	1.01917	1.78751e-06	3.54261e-05
	LINC00346	223.046	586.349	2.40872	1.26827	1.83895e-06	3.6388e-05
	TMEM229B	42.4171	191.425	3.32311	1.73253	1.85878e-06	3.67226e-05
	MGC72080	251.726	633.402	2.35829	1.23774	1.88046e-06	3.70927e-05
	HSPA1A	980.883	345.281	0.406705	-1.29795	1.91235e-06	3.76625e-05
	ANKRD32	439.742	154.556	0.389003	-1.36215	1.91927e-06	3.77397e-05
	HAUS4	2274.09	1065.46	0.494429	-1.01616	1.96978e-06	3.86722e-05
	KIAA1279	1767.31	743.534	0.449404	-1.15392	2.04181e-06	4.0024e-05
	CENPI	356.482	103.594	0.342835	-1.54441	2.0521e-06	4.0163e-05
	DNAJC1	1397.28	587.589	0.451553	-1.14703	2.09656e-06	4.09692e-05
	RASSF7	2435.27	1161.79	0.499845	-1.00045	2.12069e-06	4.13765e-05
	TMEM40	600.093	1341.68	2.10909	1.07662	2.13053e-06	4.15039e-05
	DCK	2908.13	1407.74	0.500604	-0.998259	2.1463e-06	4.17465e-05
	GMPS	4177.86	1791.99	0.450408	-1.15069	2.28011e-06	4.42806e-05
	SLC44A5	66.8891	268.845	3.17657	1.66747	2.28422e-06	4.42919e-05
	RNF7	2522.16	5302.69	2.03393	1.02427	2.39169e-06	4.63044e-05
	TBCD	5704.72	2699.81	0.496045	-1.01146	2.41021e-06	4.65913e-05
	UPF3B	2472.49	1166.88	0.493601	-1.01858	2.4159e-06	4.66294e-05
	HNRNPD	30723.9	15697.2	0.52762	-0.922428	2.4277e-06	4.67853e-05
	CCDC9	1382.7	606.473	0.461718	-1.11491	2.43362e-06	4.68276e-05
	SART1	10108.7	4912.1	0.501275	-0.996327	2.45863e-06	4.72366e-05
	NIPAL1	76.1086	273.196	2.99937	1.58466	2.51085e-06	4.81662e-05
	LOC100506314	132.497	386.864	2.5876	1.37161	2.55071e-06	4.88563e-05
	GPR56	998.547	2185.33	2.0947	1.06674	2.56195e-06	4.89969e-05
	SAP30	1312.7	567.693	0.457149	-1.12926	2.60722e-06	4.97868e-05
	CEP131	1345.86	619.953	0.483128	-1.04952	2.7e-06	5.14802e-05
	UPP1	807.011	337.476	0.449519	-1.15355	2.73605e-06	5.20886e-05
	AMZ2P1	635.975	1450.53	2.17651	1.12202	2.76394e-06	5.254e-05
	FAM86DP	376.323	901.03	2.26864	1.18183	2.77699e-06	5.27082e-05
	NOC2L	19355	9382.12	0.506628	-0.981002	2.80045e-06	5.30734e-05
	KPNB1	22929.8	11596.9	0.520237	-0.942758	2.8268e-06	5.3492e-05
	KLLN	42.5154	183.664	3.25709	1.70359	2.87027e-06	5.41936e-05
	SH3BP1	4064.26	2001.66	0.512553	-0.964227	2.8725e-06	5.41936e-05
	GPAT2	1114.12	458.466	0.443091	-1.17433	2.95054e-06	5.55826e-05
	HMCES	10465.3	5365.4	0.531596	-0.911599	2.95939e-06	5.56658e-05
	EPB41L2	5035.63	2510.01	0.520681	-0.941528	2.98253e-06	5.60171e-05
	RACGAP1P	343.276	101.305	0.349706	-1.51578	3.04006e-06	5.70125e-05
	CREBL2	793.598	1714.89	2.08679	1.06129	3.11128e-06	5.81928e-05
	PMM1	2580.37	1275.09	0.507666	-0.978049	3.11226e-06	5.81928e-05
	COX20	2061.56	4072.92	2.0021	1.00152	3.14173e-06	5.86565e-05
	LHX5	162.46	463.108	2.61056	1.38436	3.20054e-06	5.96659e-05
	ASS1	1244.88	2533.57	1.96463	0.974259	3.20692e-06	5.96962e-05
	ITGB3BP	1983.15	920.07	0.485962	-1.04108	3.24066e-06	6.0235e-05
	KISS1R	154.529	31.222	0.29228	-1.77458	3.3107e-06	6.1446e-05
	SEMA4G	769.586	1732.71	2.10774	1.0757	3.33928e-06	6.18851e-05
	CENPN	5399.44	2713.56	0.522974	-0.935188	3.35124e-06	6.20151e-05
	PARD6G	1007.99	2116.06	2.00396	1.00286	3.4139e-06	6.30818e-05
	BDNF	991.983	2064.8	1.98932	0.992279	3.42625e-06	6.31698e-05
	PAF1	5792.55	2721.98	0.487674	-1.03601	3.42872e-06	6.31698e-05
	TMEM109	5529.81	2799.76	0.525845	-0.927291	3.47468e-06	6.3923e-05
	NRGN	2517.07	1151.05	0.4873	-1.03712	3.48134e-06	6.39518e-05
	LAMA3	52.4483	205.637	3.09041	1.6278	3.51214e-06	6.44233e-05
	MARCH2	263.25	646.289	2.27433	1.18544	3.61141e-06	6.61478e-05
	C14orf28	73.0961	254.618	2.91566	1.54382	3.84316e-06	7.029e-05
	TRIM59	1745.84	819.729	0.493229	-1.01967	3.86628e-06	7.06102e-05
	APOBEC3H	27.9099	144.137	3.52911	1.8193	3.96692e-06	7.2343e-05
	GTF2H5	2062.51	4083.09	1.92485	0.944749	3.98486e-06	7.25649e-05
	CLN8	1157.1	2490.45	2.06325	1.04492	4.10496e-06	7.46438e-05
	PRKAG2	1274.12	2569.4	1.9421	0.957616	4.12483e-06	7.48966e-05
	SYNJ2BP	1345.83	2711.59	1.93971	0.955841	4.23684e-06	7.68195e-05
	OBFC1	2360.01	4617.88	1.89105	0.919185	4.27941e-06	7.74796e-05
	WDR24	1275.98	589.858	0.483316	-1.04896	4.34793e-06	7.86069e-05
	SMPD4	8654.73	4309.18	0.523189	-0.934596	4.39764e-06	7.93912e-05
	SAMD12	328.949	775.395	2.1967	1.13534	4.41659e-06	7.9619e-05
	KDELC2	1904.78	924.665	0.506314	-0.981896	4.48719e-06	8.07758e-05
	CHTF18	1241.08	571.748	0.484322	-1.04596	4.59671e-06	8.2629e-05
	TUBGCP3	3266.08	1541.15	0.494926	-1.01471	4.66526e-06	8.37415e-05
	KDM1A	14095.3	6849.22	0.508088	-0.976848	4.67333e-06	8.37667e-05
	KSR1	239.813	611.111	2.3546	1.23548	4.80381e-06	8.59826e-05
	PGF	672.309	1428.87	2.02378	1.01705	4.90634e-06	8.7693e-05
	NDRG4	285.536	691.582	2.26514	1.1796	4.91385e-06	8.77025e-05
	ACTB	183736	95167.4	0.529682	-0.916802	4.94872e-06	8.81995e-05
	EGR1	2191.73	1023.95	0.489775	-1.02981	4.97006e-06	8.84544e-05
	TM7SF2	1122.49	2418.15	2.07706	1.05454	5.10218e-06	9.06773e-05
	IL22RA1	379.113	134.131	0.392887	-1.34781	5.1744e-06	9.17116e-05
	SLC19A1	3548.52	1788.68	0.516911	-0.952013	5.17497e-06	9.17116e-05
	CCT5	37454.6	16995.7	0.474745	-1.07477	5.24641e-06	9.2716e-05
	ZC3H18	3541.24	1789.22	0.51873	-0.946945	5.2408e-06	9.2716e-05
	ARRB1	2001.48	3915.49	1.89037	0.918672	5.25797e-06	9.27899e-05
	GLI2	450.286	166.242	0.412304	-1.27822	5.27095e-06	9.28885e-05
	LINC00674	1178.77	2397.14	1.95401	0.966438	5.33448e-06	9.38764e-05
	METTL8	1695.81	3362.89	1.91313	0.935936	5.40456e-06	9.49767e-05
	SYNCRIP	16480.8	8504.34	0.530384	-0.914892	5.42847e-06	9.52635e-05
	MAPK13	3666.38	7134.2	1.88189	0.912181	5.43965e-06	9.53266e-05
	TMEM182	171.968	468.008	2.46959	1.30427	5.50163e-06	9.62785e-05
	PLSCR1	1482.13	696.737	0.485698	-1.04187	5.53749e-06	9.67714e-05
	PRDM1	15.6802	110.682	3.80147	1.92656	5.57876e-06	9.73571e-05
	DANCR	2999.13	5851.36	1.90724	0.93149	5.60567e-06	9.76911e-05
	C9orf40	985.466	432.847	0.463946	-1.10797	5.77139e-06	0.00010044
	ZNF516	398.1	900.745	2.13976	1.09745	5.78182e-06	0.000100482
	PLCB3	7910.03	3979.54	0.525574	-0.928035	5.89047e-06	0.000102229
	KHDRBS1	10919.7	4988	0.490508	-1.02765	5.97565e-06	0.000103422
	USP5	6337	3041.34	0.514026	-0.960086	5.97475e-06	0.000103422
	SAPCD2	18659.9	9599.25	0.533895	-0.905372	6.09576e-06	0.000105211
	TAP1	3740.71	7340.41	1.90495	0.929754	6.09409e-06	0.000105211
	COX14	2330.54	4753.27	2.0039	1.00281	6.15788e-06	0.000106137
	HAPLN3	492.735	191.762	0.420126	-1.2511	6.26227e-06	0.000107788
	DHCR7	4189.91	2126.06	0.525662	-0.927791	6.28508e-06	0.000108033
	PRKG2	20.9896	128.795	3.69535	1.88571	6.37148e-06	0.000109368
	BAG3	7304.71	3589.17	0.507659	-0.978068	6.40385e-06	0.000109774
	DLST	8033.14	3944.44	0.51783	-0.94945	6.4344e-06	0.000110147
	KHK	1021.46	467.93	0.482176	-1.05237	6.78686e-06	0.000115893
	USP7	9457.6	5001.06	0.544862	-0.876036	6.78849e-06	0.000115893
	IPO9	5965.66	2947.76	0.514828	-0.957837	6.82551e-06	0.000116367
	GLRX	811.386	1701.1	1.99939	0.999563	6.88866e-06	0.000117285
	PRRG2	424.793	947.356	2.10358	1.07285	6.94161e-06	0.000117867
	SEMA3F	1127.38	2255.79	1.92617	0.945736	6.93937e-06	0.000117867
	TAF15	16276.6	7625.95	0.493584	-1.01863	7.01876e-06	0.000119016
	EIF4A3	16946.8	8213.58	0.485884	-1.04132	7.05574e-06	0.000119482
	PRSS30P	79.2812	261.682	2.75481	1.46195	7.14359e-06	0.000120806
	VAMP8	2678.42	5480.85	1.9893	0.99226	7.22687e-06	0.000122051
	ACTG1	484877	253207	0.526046	-0.926738	7.26091e-06	0.000122461
	DEGS1	3681.23	1892.27	0.532931	-0.907979	7.34496e-06	0.000123712
	PRKAB1	1210.52	2563.3	2.01615	1.01161	7.38676e-06	0.00012425
	SAT2	1628.19	3344.75	1.93313	0.950936	7.77794e-06	0.000130655
	DCLRE1B	2128.7	1062.71	0.519333	-0.945268	7.8007e-06	0.000130719
	RHOD	2528.28	5148	1.99152	0.993871	7.80259e-06	0.000130719
	BAZ1B	6547.47	3452.89	0.543636	-0.879288	7.83701e-06	0.000130947
	LOC100130899	471.361	1023.87	2.0593	1.04215	7.82705e-06	0.000130947
	DDB2	2233.4	4613.41	1.97981	0.985363	7.86574e-06	0.000131252
	SUZ12	4400.67	2192.63	0.520692	-0.941499	7.94533e-06	0.000132405
	MTHFD1	5059.85	2442.05	0.505543	-0.984095	7.97085e-06	0.000132654
	STX6	2957.62	5646.72	1.84945	0.887093	8.10402e-06	0.000134692
	CASKIN2	1592.1	743.906	0.488411	-1.03383	8.25823e-06	0.000137074
	MAML3	107.99	328.085	2.63351	1.39699	8.47675e-06	0.000140515
	LINC00662	59.1743	225.996	3.05592	1.61161	8.52636e-06	0.000141151
	CASC5	568.427	233.17	0.441739	-1.17873	8.75754e-06	0.000144787
	AP4M1	899.329	403.316	0.478689	-1.06284	8.94291e-06	0.000147658
	ODF2	2910.12	1483.4	0.529772	-0.916557	9.33271e-06	0.000153892
	KIF5B	9314.53	4740.74	0.519816	-0.943927	9.43143e-06	0.000155316
	SLC3A2	12436	6072.15	0.518391	-0.947888	9.72488e-06	0.000159939
	LOC101927501	4.68977	75.454	4.07581	2.02709	9.76672e-06	0.000160417
	NCL	56910.8	28540.7	0.518891	-0.946496	9.91771e-06	0.000162684
	TMEM200B	1501.12	730.48	0.500796	-0.997706	1.00506e-05	0.000164648
	DNAAF3	3344.58	6348.87	1.8415	0.880879	1.01078e-05	0.000165371
	CDK11B	2130.77	1046.2	0.512962	-0.963075	1.01252e-05	0.00016541
	SHC1	10802.4	20354.7	1.81575	0.860569	1.01365e-05	0.00016541
	LOC100996579	225.07	575.997	2.40253	1.26455	1.02358e-05	0.000166813
	TRIM5	444.833	977.657	2.08105	1.05731	1.0377e-05	0.000168896
	C12orf49	1086.47	2283.64	2.05188	1.03695	1.04843e-05	0.0001702
	DSE	1706.08	3290.35	1.86515	0.899288	1.04742e-05	0.0001702
	TEP1	368.672	839.907	2.18945	1.13057	1.05421e-05	0.000170918
	LOC257396	325.631	773.222	2.20828	1.14292	1.06532e-05	0.000172382
	SLC16A5	868.416	1821.34	2.01087	1.00782	1.06599e-05	0.000172382
	MAP3K13	323.388	763.367	2.24685	1.1679	1.08023e-05	0.000174462
	UBTF	12179.7	6565.47	0.554694	-0.850236	1.08721e-05	0.000175363
	C10orf54	1356.96	2821.45	1.95957	0.970539	1.10175e-05	0.000177481
	JPH1	873.295	394.622	0.476359	-1.06988	1.10333e-05	0.000177507
	PARP1	12025.2	5453	0.492969	-1.02043	1.12863e-05	0.000181345
	CACYBP	12927.4	6969.37	0.554944	-0.849586	1.13359e-05	0.000181679
	RIMS3	345.133	791.551	2.12733	1.08904	1.13313e-05	0.000181679
	HOXB13	917.726	1902.16	1.96158	0.972017	1.17576e-05	0.000188196
	MALL	733.755	1560.04	2.03697	1.02642	1.19879e-05	0.000191638
	PALM3	574.532	242.256	0.435556	-1.19907	1.22047e-05	0.000194778
	WDR72	212.988	574.684	2.48755	1.31472	1.22153e-05	0.000194778
	HSPB1	37052.3	20217.9	0.560013	-0.836468	1.23922e-05	0.000197349
	FANCB	226.924	66.9405	0.360254	-1.47291	1.2501e-05	0.000198829
	VPS13C	153.127	412.477	2.42296	1.27677	1.25352e-05	0.000199121
	GPR19	123.734	24.0824	0.297116	-1.7509	1.27412e-05	0.000202138
	DPYSL3	1711.36	825.035	0.509249	-0.973557	1.39956e-05	0.000221758
	PGP	4448.69	2356.06	0.547514	-0.869034	1.42366e-05	0.000225294
	RAP2B	4288.4	7942.99	1.79919	0.847349	1.44504e-05	0.00022839
	ANP32B	25802.7	14094.3	0.561097	-0.833679	1.45483e-05	0.000229648
	BANP	932.307	431.398	0.490004	-1.02913	1.45848e-05	0.000229935
	PTTG3P	741.086	308.741	0.448074	-1.15819	1.48062e-05	0.000233133
	TCTA	900.861	2001.91	2.05265	1.03749	1.48345e-05	0.000233286
	HMGA2	8994.82	18008.1	1.96169	0.972099	1.49278e-05	0.000234446
	HNRNPF	29591.3	15381.4	0.530897	-0.913496	1.49456e-05	0.000234446
	DDX46	6718.87	3502.61	0.537797	-0.894867	1.52059e-05	0.000238232
	ASRGL1	2818.73	1460.75	0.529508	-0.917277	1.52903e-05	0.000239257
	PCNP	5961.26	11407.8	1.86026	0.895506	1.53421e-05	0.000239768
	WIPI1	940.388	1858.48	1.90961	0.933278	1.54912e-05	0.000241798
	CCT2	25468.3	12868.5	0.522635	-0.936126	1.55716e-05	0.000242047
	GLTP	2633.69	5325.28	1.93281	0.950697	1.55841e-05	0.000242047
	HAUS3	939.603	438.561	0.488644	-1.03314	1.55842e-05	0.000242047
	SCD	36943	17703	0.512411	-0.964627	1.55653e-05	0.000242047
	BTG1	1539	2980.18	1.86758	0.901166	1.56162e-05	0.000242244
	ADAMTS7	98.2518	292.228	2.56019	1.35625	1.63892e-05	0.000253921
	TMEM209	1634.14	763.992	0.478164	-1.06442	1.64909e-05	0.000255182
	FANCC	901.879	407.461	0.481266	-1.05509	1.65188e-05	0.0002553
	FAM84B	1265.82	2445.46	1.867	0.900724	1.70159e-05	0.00026266
	DVL2	3144.39	1570.98	0.523288	-0.934323	1.71985e-05	0.000265152
	ANXA6	2956.11	1385.05	0.503023	-0.991305	1.74341e-05	0.000268127
	CTCF	4381.36	2187.41	0.515559	-0.955791	1.74305e-05	0.000268127
	HAS3	5430.47	9990.89	1.78986	0.839846	1.76497e-05	0.00027111
	FOXN3	481.368	1021.8	2.03627	1.02593	1.77737e-05	0.000272681
	AGPAT9	2861.28	1452.79	0.531859	-0.910886	1.81553e-05	0.000278196
	GGH	3690.99	1961.64	0.548911	-0.865357	1.86127e-05	0.000284858
	SPRY1	92.5536	284.745	2.61887	1.38895	1.8822e-05	0.000287711
	P2RY2	311.98	698.733	2.10403	1.07315	1.89087e-05	0.000288685
	JMJD6	6992.83	3739.11	0.544983	-0.875716	1.94743e-05	0.00029696
	EIF3J-AS1	155.112	400.795	2.33145	1.22122	1.9671e-05	0.000299595
	HNRNPH1	19696	10319.5	0.518474	-0.947657	1.99235e-05	0.000303073
	RTN3	5339.98	2763.69	0.544333	-0.877439	2.01977e-05	0.000306873
	MBOAT2	659.134	292.167	0.473937	-1.07723	2.04665e-05	0.000310474
	TREX1	816.585	363.804	0.479328	-1.06091	2.04842e-05	0.000310474
	LRR1	2081.8	1074.09	0.535224	-0.901785	2.08633e-05	0.0003158
	SOCS4	873.322	1778.69	1.97672	0.983106	2.08857e-05	0.0003158
	NOXO1	658.1	258.168	0.452488	-1.14405	2.14064e-05	0.000323283
	NUPR1	6.78998	68.4218	3.7681	1.91384	2.14682e-05	0.000323826
	GNG12	3222.37	6294.99	1.85272	0.889642	2.19447e-05	0.000330618
	OSBPL5	1402.16	2695.77	1.87053	0.903444	2.22785e-05	0.000335245
	HDGFRP2	4473.49	2069.19	0.488531	-1.03348	2.24487e-05	0.000337402
	RGP1	388.839	842.344	2.0397	1.02836	2.26184e-05	0.000339547
	ABHD2	1934.33	953.345	0.517235	-0.951108	2.27208e-05	0.000340383
	C1RL	554.046	1137.15	1.95703	0.968669	2.27283e-05	0.000340383
	HNRNPU	17096.2	9272.72	0.555657	-0.847733	2.27896e-05	0.000340576
	KITLG	27747.2	49887.4	1.75041	0.807695	2.27954e-05	0.000340576
	FIP1L1	5258.84	2626.38	0.509121	-0.973919	2.34145e-05	0.00034941
	APOBEC3B	787.411	324.536	0.442349	-1.17674	2.39315e-05	0.000356702
	RBBP4	5986.49	3004.14	0.529083	-0.918433	2.454e-05	0.000365338
	RNF11	2283.86	4561.69	2.06376	1.04527	2.55635e-05	0.000380124
	NUP107	1283.46	592.318	0.485684	-1.04191	2.57272e-05	0.000382107
	LUC7L3	9231.66	4998.08	0.551546	-0.858448	2.61836e-05	0.000388425
	CASC10	107.078	306.347	2.49016	1.31624	2.6384e-05	0.000390938
	SF3B4	11088.7	5822.29	0.538548	-0.892852	2.66463e-05	0.00039436
	ENO1	136994	66576.9	0.504041	-0.988386	2.68954e-05	0.000397578
	HAUS7	2681.41	1418.76	0.545311	-0.874849	2.69536e-05	0.00039797
	USP11	2786.2	1379.91	0.519737	-0.944145	2.73473e-05	0.000403308
	RTKN2	456.146	173.181	0.429933	-1.21782	2.79505e-05	0.000411721
	EFNB1	1580.5	2976.06	1.81912	0.86324	2.82857e-05	0.000415684
	PNN	4528.13	2453.91	0.557386	-0.843251	2.82662e-05	0.000415684
	BUD13	3118.69	1644.25	0.546788	-0.870945	2.91575e-05	0.000427995
	STMN1	47581.3	26611	0.575902	-0.796104	2.93285e-05	0.000430003
	CEP152	650.924	185.09	0.384036	-1.38069	2.94214e-05	0.000430862
	GEMIN4	5214.19	2655.99	0.529174	-0.918185	3.01121e-05	0.000440464
	LOC283335	116.423	321.838	2.4186	1.27417	3.01472e-05	0.000440464
	AAAS	3285.52	1714.32	0.543172	-0.880519	3.05323e-05	0.000445573
	TUBG1	11052.9	6109.78	0.569158	-0.813099	3.08294e-05	0.000449387
	FSCN1	18117.2	9870.15	0.559784	-0.837057	3.08784e-05	0.000449579
	FAM132B	747.289	339.376	0.485506	-1.04244	3.09368e-05	0.000449908
	IDH2	2490.87	1310.09	0.543033	-0.880889	3.09889e-05	0.000450145
	SLC25A15	2294.87	4340.57	1.81989	0.863849	3.1108e-05	0.000451354
	RHBDL3	301.592	107.213	0.4031	-1.31079	3.13143e-05	0.000453823
	DUOX1	160.131	440.394	2.47126	1.30525	3.15061e-05	0.000454505
	HCFC1	4198.64	2284.53	0.560527	-0.835145	3.14913e-05	0.000454505
	PPAPDC2	331.89	720.067	2.06966	1.0494	3.14383e-05	0.000454505
	PRIMA1	131.306	29.0697	0.320223	-1.64285	3.14354e-05	0.000454505
	TOP3A	1886.97	976.614	0.535072	-0.902195	3.15599e-05	0.000454759
	FAM198B	52.318	184.762	2.79895	1.48489	3.17906e-05	0.000457559
	CCNE1	3581.41	1935.98	0.557951	-0.841791	3.20294e-05	0.000460064
	SCAMP4	3778.42	2048.16	0.55886	-0.839441	3.20379e-05	0.000460064
	WWP1	2090.64	3854.16	1.78808	0.838414	3.21054e-05	0.000460507
	CEP85L	134.353	353.182	2.36753	1.24338	3.24427e-05	0.000464815
	SRSF11	9204.67	5112.49	0.569889	-0.811248	3.25756e-05	0.000466187
	ATXN7L3B	3874.48	7058.82	1.76407	0.818907	3.27287e-05	0.000467845
	SLC44A2	4575.71	2486.3	0.562215	-0.830805	3.29516e-05	0.000470497
	FOXO4	598.721	1204.25	1.91958	0.940793	3.31364e-05	0.000472081
	LAS1L	3792.7	1672.48	0.480743	-1.05666	3.31378e-05	0.000472081
	COMMD4	6715.45	3704.65	0.56609	-0.820896	3.32231e-05	0.000472482
	HIST1H2BL	77.5376	10.1837	0.280822	-1.83227	3.3241e-05	0.000472482
	ICK	445.325	972.045	2.03213	1.023	3.33416e-05	0.000473375
	NEDD1	1361.05	669.878	0.510663	-0.969555	3.36297e-05	0.000476389
	STAU1	8001.5	4354.24	0.562758	-0.829414	3.36126e-05	0.000476389
	DGCR8	3616.67	1877.05	0.543902	-0.878581	3.36803e-05	0.000476569
	RNF40	8178.64	4260.5	0.5436	-0.879382	3.42578e-05	0.000484195
	CEP72	752.746	345.171	0.488162	-1.03457	3.43004e-05	0.000484252
	UCA1	1829.69	3693.23	1.97217	0.979782	3.45422e-05	0.000487119
	MIS18BP1	898.964	431.627	0.498288	-1.00495	3.47704e-05	0.000489787
	EIF4A2	5624.02	10057.5	1.74632	0.80432	3.49401e-05	0.000491626
	GPR110	3128.9	5731.77	1.78162	0.833188	3.5306e-05	0.000495111
	MOSPD1	2713.03	4979.52	1.816	0.860763	3.52968e-05	0.000495111
	TMEM97	4895.2	2690.1	0.564977	-0.823736	3.52293e-05	0.000495111
	EED	3220.08	1697.97	0.538374	-0.893321	3.55657e-05	0.000498198
	CSE1L	8650.66	4694.51	0.557432	-0.843133	3.57087e-05	0.000499644
	ZDHHC21	263.38	592.368	2.10122	1.07123	3.57989e-05	0.000500348
	SNRNP70	9011.37	4384.32	0.509719	-0.972226	3.60036e-05	0.00050265
	DBF4B	1913.75	957.563	0.520536	-0.94193	3.64832e-05	0.000508781
	ILF2	27991.9	13810.3	0.529219	-0.918064	3.73444e-05	0.000520213
	ADIRF	5400.28	10266.1	1.92315	0.943475	3.75036e-05	0.000521852
	FUCA1	1603.09	3036.86	1.81421	0.859341	3.76687e-05	0.000523569
	BSDC1	2644.27	4818.5	1.77948	0.831458	3.79494e-05	0.000526889
	CHST6	561.876	1155.7	1.95539	0.967459	3.8391e-05	0.000532431
	CHORDC1	5182.91	2713.83	0.54288	-0.881295	3.86427e-05	0.000535331
	CHMP1B	2048.15	3889.36	1.81889	0.863055	3.86971e-05	0.000535494
	CEP78	1450.26	733.684	0.529431	-0.917486	3.91192e-05	0.00054074
	TAOK2	5200.01	2869.91	0.568195	-0.815542	3.9362e-05	0.000543499
	SOWAHB	105.497	296.73	2.43256	1.28248	3.94464e-05	0.000544066
	SNN	823.871	1748.39	2.0402	1.02871	3.95981e-05	0.000545559
	SSX2IP	3986.11	2155.61	0.558402	-0.840624	3.99861e-05	0.000550301
	TMSB10	33140.9	57879.9	1.7885	0.838753	4.02607e-05	0.000553474
	RFNG	2539	4657.43	1.77224	0.825572	4.03498e-05	0.000554094
	DDX12P	437.51	179.629	0.44814	-1.15798	4.05729e-05	0.000556549
	CEP135	537.815	235.506	0.470586	-1.08747	4.09086e-05	0.00055993
	RNF43	2419.06	4409.05	1.77383	0.826872	4.09082e-05	0.00055993
	LINC01234	1973.8	3933.08	1.87951	0.910353	4.1228e-05	0.000563689
	MYOM3	370.8	790.714	2.01774	1.01274	4.12848e-05	0.000563852
	ZNF385A	3537.08	6371.63	1.74962	0.807045	4.13377e-05	0.000563961
	GNA11	8993.43	4972.17	0.566251	-0.820487	4.16828e-05	0.000568052
	CORO1C	10585.7	5485.13	0.539264	-0.890938	4.18325e-05	0.000569475
	FDPS	9453.75	5247.97	0.572641	-0.804297	4.20782e-05	0.0005722
	MFSD4	37.2551	149.798	2.95268	1.56202	4.29719e-05	0.000583721
	GINS4	2409.25	1280.15	0.551883	-0.857566	4.38824e-05	0.000594843
	TBC1D10B	6766.34	3768.18	0.571681	-0.806717	4.38854e-05	0.000594843
	EWSR1	14540.3	7478.44	0.533347	-0.906853	4.40695e-05	0.000596695
	DTYMK	10321.4	5638.64	0.553602	-0.853079	4.42338e-05	0.000598276
	ANGPTL4	596.361	234.817	0.446958	-1.16179	4.43391e-05	0.000598788
	EPCAM	19621.7	10639.3	0.559248	-0.83844	4.4367e-05	0.000598788
	GIPR	17.3574	97.9562	3.29749	1.72137	4.53058e-05	0.000610802
	FBLN1	1222.1	568.23	0.495827	-1.01209	4.55744e-05	0.000613765
	FOXRED1	3123.2	1604.26	0.543968	-0.878406	4.60715e-05	0.000619794
	G2E3	1365.01	699.389	0.533721	-0.905843	4.61642e-05	0.000620378
	LRRC20	4679.41	2623.64	0.562972	-0.828865	4.66885e-05	0.000626753
	TSPAN31	481.904	1023.84	1.95954	0.970513	4.67478e-05	0.000626879
	BRAT1	2289.23	1096.5	0.504831	-0.986127	4.68622e-05	0.000627744
	PCNXL2	322.719	724.927	2.12645	1.08845	4.74567e-05	0.000635031
	SESN3	107.435	294.665	2.40504	1.26606	4.80565e-05	0.000642372
	DBR1	1281.45	627.462	0.504649	-0.986648	4.88877e-05	0.000652788
	CCAR2	8305.24	4565.4	0.569081	-0.813293	4.96032e-05	0.00066164
	CEP128	490.312	202.367	0.451636	-1.14677	4.98997e-05	0.000664888
	NXPH4	2170.42	1155.49	0.539498	-0.89031	5.00268e-05	0.000665876
	OIP5	1489.2	742.102	0.520023	-0.943353	5.04925e-05	0.000671364
	COL6A2	2021.11	1075.47	0.547898	-0.86802	5.12032e-05	0.000680094
	CHERP	4340.74	2346.52	0.558038	-0.841565	5.14846e-05	0.000683109
	FDFT1	8355.97	4306.33	0.538696	-0.892455	5.17461e-05	0.000685855
	SIDT2	915.707	1746.23	1.83638	0.876864	5.19555e-05	0.000687904
	PRRG1	557.4	1109.93	1.90224	0.927696	5.30532e-05	0.000701699
	NELFA	3828.64	2086.2	0.558904	-0.839328	5.34179e-05	0.000705038
	NOP58	8367.9	4613.27	0.565543	-0.822292	5.33675e-05	0.000705038
	DUSP18	129.877	367.455	2.53104	1.33973	5.34895e-05	0.000705241
	TRA2B	15459.8	8809.7	0.580778	-0.783942	5.40154e-05	0.000711429
	AP3D1	11741.9	6307.44	0.558978	-0.839136	5.71386e-05	0.000751776
	MFAP1	3531.36	1800.18	0.535879	-0.900021	5.77971e-05	0.000759645
	RDM1	470.766	202.901	0.451841	-1.14611	5.79227e-05	0.0007605
	C5orf34	207.787	65.1425	0.382125	-1.38788	5.83746e-05	0.000765633
	IKZF5	1056.49	2001.74	1.83697	0.87733	5.95749e-05	0.000779749
	TMEM64	1974.62	3633.59	1.80416	0.851327	5.95623e-05	0.000779749
	ZFP90	582.182	1150.83	1.88708	0.916153	5.98977e-05	0.000783157
	CLSTN1	8053.62	4391.12	0.564835	-0.824098	6.03122e-05	0.000786939
	HSD17B11	2983.25	1603.93	0.556378	-0.845862	6.02935e-05	0.000786939
	LINC00909	534.591	1087.23	1.91832	0.939847	6.13829e-05	0.000800079
	TAF13	575.659	1218.55	2.15456	1.10739	6.19856e-05	0.000807098
	FANCM	482.13	210.395	0.466128	-1.1012	6.31609e-05	0.000821276
	XRCC5	19886.1	10112.3	0.533748	-0.90577	6.32052e-05	0.000821276
	RBMX	12007.5	6083.66	0.530607	-0.914284	6.32894e-05	0.00082152
	RAD9A	810.702	393.571	0.511895	-0.966081	6.36763e-05	0.000825689
	BMS1P20	384.06	814.483	2.04836	1.03447	6.39597e-05	0.000828509
	UFM1	1625.55	3182.98	1.91923	0.940531	6.41686e-05	0.000830359
	SEMA3G	186.423	444.216	2.18106	1.12503	6.52153e-05	0.000843036
	PELP1	4319.5	2323.04	0.558479	-0.840424	6.5667e-05	0.000848002
	CAV1	24870.8	43261.6	1.69536	0.761594	6.57793e-05	0.00084858
	TMEM184C	992.657	1859.1	1.81562	0.860459	6.61627e-05	0.000852651
	PSKH1	1026.02	1939.92	1.8141	0.859254	6.68184e-05	0.000860219
	HNRNPUL2	3809.45	1926.66	0.535045	-0.902268	6.78657e-05	0.000872807
	HSPG2	376.112	871.216	2.15162	1.10542	6.82024e-05	0.00087583
	LOC401010	998.131	483.365	0.508505	-0.975667	6.82402e-05	0.00087583
	LINC00920	37.7125	151.579	2.94339	1.55748	6.89524e-05	0.000884068
	LINC00998	995.952	1908.21	1.83273	0.873993	6.90553e-05	0.000884485
	ING1	2342.62	1262.26	0.560438	-0.835372	7.08376e-05	0.000905437
	ITPKA	1324.34	669.364	0.527173	-0.92365	7.09073e-05	0.000905437
	RNH1	8998.56	4974.6	0.568051	-0.815909	7.08139e-05	0.000905437
	GPX8	2223.81	1212.64	0.559813	-0.836983	7.1269e-05	0.000909131
	INTS7	1686.73	889.632	0.543561	-0.879487	7.14874e-05	0.00091007
	TMEM117	189.485	445.215	2.15455	1.10739	7.14803e-05	0.00091007
	CXCL8	61.0115	196.729	2.63388	1.39719	7.19048e-05	0.000914358
	FMNL3	273.965	91.5515	0.397324	-1.33161	7.19698e-05	0.000914358
	RTN4R	1022.79	507.41	0.526019	-0.926812	7.29992e-05	0.000926499
	CTIF	535.917	1055.42	1.88792	0.916794	7.36158e-05	0.000933383
	LOXL2	518.95	225.398	0.475019	-1.07394	7.42512e-05	0.00094049
	SNX13	1124.01	2092.74	1.81127	0.857004	7.48907e-05	0.000947636
	LOC150776	1376.23	708.731	0.531919	-0.91072	7.57921e-05	0.000958076
	ASNS	3172.02	1699.17	0.540322	-0.888109	7.594e-05	0.000958981
	CSTF2	2636.83	1295.91	0.508683	-0.975161	7.60208e-05	0.000959037
	PLEKHG1	97.9248	289.401	2.49697	1.32018	7.67217e-05	0.000966909
	UBALD2	4943.53	2792.12	0.579699	-0.786625	7.74402e-05	0.000974986
	GTF2F1	10746.7	5783.46	0.564028	-0.826162	7.85217e-05	0.000987613
	TUSC2	2927.03	5355.17	1.79547	0.84436	7.96773e-05	0.00100115
	C14orf182	30.5807	145.712	3.11245	1.63805	8.02671e-05	0.00100755
	COPS3	8251.82	4555.63	0.563745	-0.826885	8.08508e-05	0.00101386
	CCT7	36558.9	18175.2	0.53291	-0.908037	8.10751e-05	0.00101566
	FOXD2-AS1	377.162	153.815	0.447413	-1.16032	8.14959e-05	0.00101992
	H2AFY2	3437.19	1844.36	0.560555	-0.835073	8.16201e-05	0.00102045
	TCIRG1	611.737	278.863	0.485398	-1.04276	8.22172e-05	0.0010269
	CDCA7L	5105.01	2801	0.564369	-0.825288	8.30732e-05	0.00103611
	DLGAP1-AS1	82.4756	244.972	2.54827	1.34952	8.31193e-05	0.00103611
	DNM2	7268.42	3903.32	0.55507	-0.849259	8.47471e-05	0.00105326
	RRP1	6157.32	3484.22	0.578635	-0.789275	8.46907e-05	0.00105326
	SFR1	1465.04	762.281	0.543671	-0.879194	8.46044e-05	0.00105326
	CCDC77	666.941	241.762	0.420649	-1.24931	8.51938e-05	0.00105777
	CCNB1IP1	1919	3468.82	1.80001	0.848003	8.58529e-05	0.00106385
	LINC00673	1265.21	2536.72	1.8662	0.900102	8.58416e-05	0.00106385
	TMEM42	288.848	641.418	2.0758	1.05366	8.6012e-05	0.00106477
	WIPF3	731.117	1399.77	1.85084	0.888182	8.61488e-05	0.00106541
	APBB2	2053.26	3663.67	1.73291	0.793199	8.63565e-05	0.00106693
	MYH16	33.9819	135.873	2.89589	1.534	8.74999e-05	0.00108
	SAMD5	263.151	581.763	2.05682	1.04042	8.76573e-05	0.00108088
	CKAP5	4054.27	2264.2	0.577714	-0.791572	8.81174e-05	0.00108549
	GEN1	520.799	233.827	0.484306	-1.04601	8.84236e-05	0.00108819
	SQLE	3227.69	1730.55	0.556702	-0.845022	8.86557e-05	0.00108998
	DUSP14	3823.13	6748.73	1.71469	0.777952	8.89264e-05	0.00109153
	NUP93	5295.06	2598.3	0.510278	-0.970644	8.89559e-05	0.00109153
	ENO2	2930.05	1517.05	0.545976	-0.87309	8.92648e-05	0.00109426
	CCAT1	208.413	493.72	2.26293	1.17819	8.98992e-05	0.00110096
	S100PBP	837.007	414.632	0.521507	-0.939241	9.04881e-05	0.00110709
	NUDT1	4854.99	2595.16	0.551971	-0.857335	9.12205e-05	0.00111497
	REEP4	4052.58	2211.7	0.565891	-0.821405	9.14989e-05	0.00111728
	C5orf55	66.2398	203.967	2.54902	1.34994	9.18109e-05	0.00112
	PRR24	524.495	234.309	0.482522	-1.05133	9.25382e-05	0.00112778
	LOC100505549	176.136	424.023	2.20348	1.13978	9.26559e-05	0.00112812
	SRSF8	2970.14	5253.99	1.72218	0.784235	9.34791e-05	0.00113704
	CMTM4	3286.23	5867.41	1.7308	0.791438	9.43638e-05	0.00114669
	PLLP	121.6	311.636	2.28195	1.19027	9.51206e-05	0.00115477
	CDC25B	12227.6	6945.56	0.588004	-0.766103	9.53172e-05	0.00115604
	RYK	2597.63	4793.44	1.81705	0.861598	9.61947e-05	0.00116556
	C1orf35	1987.91	1049.66	0.555863	-0.847199	9.64752e-05	0.00116783
	DNAJC22	621.119	1292.86	1.94411	0.959112	9.70181e-05	0.00117327
	NCAPD2	7364.13	4213.94	0.588673	-0.764463	9.79826e-05	0.0011838
	LDHA	75191.8	41169.1	0.568728	-0.814188	9.84424e-05	0.00118821
	TPST2	899.872	1683.47	1.79563	0.844489	9.9702e-05	0.00120226
	IRX4	778.196	375.028	0.515582	-0.955726	0.000100002	0.00120472
	WDR18	7945.03	4538.95	0.588929	-0.763835	0.000100577	0.00121049
	PCBP1	16894.3	9297.59	0.564049	-0.826108	0.000102237	0.00122929
	ELOVL5	2502.76	1374.21	0.568062	-0.815878	0.000102685	0.0012335
	CCNG2	439.558	914.118	1.93393	0.951535	0.000102889	0.00123359
	DDIT4L	209.073	471.035	2.08511	1.06013	0.000102882	0.00123359
	EFNA2	448.588	178.505	0.450182	-1.15142	0.000103427	0.00123886
	FKBP4	34457.2	17870.5	0.553992	-0.852063	0.000104761	0.00125364
	AP1AR	1799.94	3371.23	1.84787	0.885865	0.000105871	0.00126572
	WDR34	20526.2	11394.5	0.567409	-0.81754	0.000106071	0.00126691
	RNF19B	1507.18	2811.04	1.78311	0.834393	0.000106257	0.00126792
	ACIN1	10953.9	6308.66	0.591974	-0.756394	0.000106378	0.00126816
	PGAP1	136.973	344.988	2.24191	1.16473	0.000106679	0.00127054
	C1orf210	277.317	622.201	2.05594	1.03979	0.000107157	0.00127502
	NFAT5	2383.48	4241.14	1.72487	0.78649	0.000107372	0.00127638
	SF1	22614.3	12813.9	0.58025	-0.785253	0.000111722	0.00132683
	SLC9B2	906.305	1764.91	1.8645	0.89879	0.000112423	0.0013339
	NRG1	43.3466	153.694	2.75375	1.4614	0.000113534	0.00134581
	KCNJ12	765.725	1524.08	1.86788	0.901401	0.000113652	0.00134594
	CPSF3	3217.59	1712.89	0.534274	-0.904349	0.000114021	0.00134777
	TMEM241	577.846	1160.17	1.94105	0.956834	0.000113955	0.00134777
	TOB1-AS1	19.2632	107.495	3.15201	1.65627	0.000114719	0.00135406
	ZNF337	797.936	1491.12	1.79801	0.846403	0.00011477	0.00135406
	APLP2	12435.3	6758.92	0.560547	-0.835093	0.00011502	0.00135448
	BTN3A2	991.526	1820.62	1.78684	0.837412	0.000115012	0.00135448
	MBNL2	2100.04	3849.74	1.76257	0.817678	0.000116051	0.00136534
	GLUD1	4842.41	2517.59	0.551351	-0.858958	0.000116472	0.00136901
	SRRM1	3485.26	1968.77	0.58176	-0.781504	0.000116584	0.00136905
	POLD4	2877.53	5484.32	1.80333	0.85066	0.000117371	0.001377
	MUTYH	1422.7	755.272	0.549978	-0.862553	0.000118751	0.00139189
	ZBTB11-AS1	326.071	685.438	1.98757	0.991006	0.000119173	0.00139554
	KLF9	221.005	490.188	2.08324	1.05883	0.000120775	0.00141298
	LINC00847	397.943	824.849	1.94827	0.962196	0.000122415	0.00143083
	RNF41	2449.48	4320.22	1.70946	0.773543	0.000124214	0.00145051
	FAM217B	558.711	1082.23	1.86899	0.902259	0.000124786	0.00145449
	SNRNP40	10719.1	5960.93	0.573616	-0.801843	0.000124726	0.00145449
	ZBTB38	677.47	1304.42	1.83926	0.879124	0.000125378	0.00146003
	BET1	675.365	1325.9	1.8961	0.923037	0.0001255	0.0014601
	RDX	2897.58	1571.06	0.562179	-0.8309	0.000127221	0.00147875
	C2CD4C	211.825	69.4297	0.396594	-1.33427	0.000127882	0.00148504
	RELT	1163.76	604.75	0.54501	-0.875644	0.000127998	0.00148504
	ETS1	462.906	203.677	0.480254	-1.05813	0.000132208	0.00153247
	TMEM167A	3599.2	6633.89	1.81355	0.858817	0.000132651	0.00153618
	S100A14	12023.5	21281	1.7608	0.816232	0.000133712	0.00154704
	SYT17	386.64	776.525	1.90553	0.930192	0.000134021	0.0015492
	SART3	4747.03	2653.79	0.565793	-0.821654	0.000134732	0.00155464
	ZWILCH	3779.93	2145.44	0.583802	-0.776449	0.00013474	0.00155464
	SRSF10	7365.77	4264.39	0.5942	-0.75098	0.000136464	0.00157309
	ACP6	711.836	1341.93	1.82797	0.87024	0.000136619	0.00157343
	TMEM121	331.74	136.388	0.454771	-1.13679	0.000137139	0.00157798
	GPR173	193.324	444.965	2.15431	1.10723	0.000137629	0.00158217
	MTFR1L	2580.84	4498.89	1.69477	0.761086	0.000138367	0.0015892
	WBP11	8355.15	4798.82	0.591933	-0.756495	0.000138504	0.00158932
	SMC6	1586.56	857.846	0.556413	-0.845772	0.000141018	0.00161669
	LOC100294145	230.704	506.347	2.09417	1.06638	0.000141276	0.00161817
	LYRM9	117.987	313.408	2.29952	1.20133	0.000142443	0.00163005
	MNX1	552.061	258.763	0.501401	-0.995963	0.000142636	0.00163078
	CHRNA5	1635.53	891.857	0.565004	-0.823667	0.000143931	0.00164408
	HNRNPA0	12988.6	7533.38	0.590138	-0.760875	0.000144666	0.00165098
	PDIA3P1	5684.18	3066.7	0.565748	-0.821767	0.000144828	0.00165133
	HNRNPK	20262.6	10017.7	0.525467	-0.928328	0.000145387	0.00165485
	KAZN	973.308	1847.68	1.81756	0.862006	0.0001454	0.00165485
	LOC100288637	425.398	183.074	0.472893	-1.08042	0.000146598	0.00166697
	ABCF1	8681.07	4871.23	0.574895	-0.798631	0.000146937	0.0016685
	KLF15	126.927	314.649	2.21743	1.14889	0.000147038	0.0016685
	NES	339.627	139.246	0.445718	-1.1658	0.000147131	0.0016685
	MAPK15	164.359	48.9549	0.381184	-1.39144	0.000147321	0.00166915
	CAP1	14337.2	7687.69	0.562249	-0.830719	0.000147953	0.0016748
	EXOSC8	4260.46	2426.44	0.589467	-0.762516	0.000148911	0.00168261
	INTS1	5054.85	2905.73	0.588678	-0.764449	0.000148802	0.00168261
	ABHD4	731.193	1359.64	1.81241	0.857908	0.000151007	0.00170477
	HSPA9	14749.5	8359.45	0.579655	-0.786735	0.00015163	0.00171026
	FAM214B	661.085	1292.76	1.83213	0.87352	0.000152426	0.0017177
	SIX2	65.7972	8.18529	0.304139	-1.7172	0.000154533	0.00173988
	WWC2	726.571	1460.28	2.00891	1.00641	0.000154862	0.00174203
	ZBTB14	723.67	359.868	0.524313	-0.931498	0.000157226	0.00176703
	HTR7P1	70.1647	208.391	2.48788	1.31492	0.000157502	0.00176855
	FANCE	2029.44	1104.86	0.565103	-0.823414	0.000157892	0.00177135
	KCNN4	3546.81	6111.19	1.67722	0.746071	0.000158975	0.00178191
	SRSF7	9560.6	5610.15	0.601513	-0.733333	0.000159132	0.00178208
	MKNK2	4879.09	8636.06	1.70919	0.773311	0.000161995	0.00181253
	C4orf3	1184.88	2244.05	1.89867	0.924989	0.000164189	0.00183544
	AARS	4267.08	2367.86	0.577713	-0.791576	0.000165316	0.00184458
	CHD5	662.091	324.228	0.519031	-0.946107	0.000165594	0.00184458
	OSBPL6	894.999	425.231	0.515862	-0.954942	0.000165368	0.00184458
	PCDH7	2410.9	4299.03	1.7846	0.835598	0.000165543	0.00184458
	FAM178A	2765.35	1563.55	0.581496	-0.782159	0.000167964	0.00186933
	POR	3926.65	2035.49	0.542309	-0.882814	0.00016846	0.00187319
	SMIM14	293.393	630.352	2.03286	1.02351	0.000168783	0.00187511
	SCLT1	709.925	350.62	0.520477	-0.942095	0.000169011	0.00187599
	BRMS1L	565.383	1073	1.82118	0.864877	0.00016917	0.0018761
	HEATR2	6116.23	3353.14	0.571126	-0.808119	0.000171632	0.00190172
	MGST2	602.864	1135.87	1.80822	0.85457	0.000173622	0.00192208
	ZSWIM4	231.346	498.545	2.01413	1.01016	0.000173899	0.00192345
	PSMB10	2820.43	4972.72	1.75956	0.815218	0.000176821	0.00195405
	PACSIN2	2521.05	1365.7	0.559065	-0.838912	0.000178342	0.00196913
	SEC14L4	462.451	895.949	1.85156	0.888743	0.000179663	0.00198197
	PTTG2	705.775	351.264	0.525288	-0.928818	0.000180694	0.00199159
	CCDC150	354.062	145.383	0.460588	-1.11845	0.000181425	0.0019979
	CD79B	15.8105	85.3385	3.05836	1.61276	0.000181975	0.00200221
	YPEL3	111.866	289.195	2.28936	1.19494	0.000183232	0.00201427
	LEPREL2	1772.89	982.511	0.573476	-0.802195	0.000183968	0.00202059
	HMGN4	4429.05	8188.61	1.73313	0.793383	0.000184334	0.00202285
	HDAC2	11183.6	6303.34	0.578619	-0.789316	0.000185428	0.00203307
	DYNLL1-AS1	634.684	1230.12	1.84875	0.886553	0.000186321	0.00204109
	PKNOX1	1480.82	809.713	0.567195	-0.818082	0.000188359	0.00206161
	PPTC7	1107.2	1988.68	1.75373	0.810423	0.000188918	0.00206593
	NSUN5	4100.85	2354.39	0.589285	-0.762963	0.000191345	0.00209065
	HNRNPR	9426.15	5279.3	0.574726	-0.799054	0.000191589	0.0020915
	PLOD1	13532.7	7539.43	0.582489	-0.779697	0.000191954	0.00209367
	NADSYN1	864.321	1570.89	1.75454	0.811092	0.00019377	0.00211146
	SAT1	10826.6	20761.7	1.95912	0.970206	0.000193921	0.00211146
	PPP1R3B	488.197	940.765	1.83943	0.879258	0.000196616	0.00213894
	CASP8AP2	790.423	390.89	0.529131	-0.918302	0.000197176	0.0021403
	KIAA1191	2586.2	4479.38	1.71554	0.778662	0.000197422	0.0021403
	PUF60	19173.7	10993.1	0.583923	-0.776151	0.000197413	0.0021403
	RAB5B	2395.42	4130.32	1.70727	0.771693	0.00019727	0.0021403
	SMCHD1	1771.04	986.996	0.57505	-0.798241	0.000199437	0.00216029
	SETD8	2817.74	1591.78	0.58664	-0.769452	0.000202696	0.00219369
	PMAIP1	2638.34	5264.33	1.96724	0.976169	0.000203427	0.0021997
	LINC00883	63.4067	190.704	2.47884	1.30966	0.000204024	0.00220427
	GPI	30643.7	17537.6	0.587956	-0.766219	0.000206055	0.00222429
	NUP43	2660.72	1494.56	0.580575	-0.784445	0.000206806	0.00223048
	HIGD1A	4965.65	9196.03	1.80707	0.853652	0.000211064	0.00227446
	PBX3	540.864	240.287	0.487618	-1.03618	0.000211794	0.00228037
	TFAP4	2838.72	1612.94	0.583809	-0.776431	0.000212973	0.00228915
	TRAPPC6B	1013.33	1819.72	1.73565	0.795479	0.00021288	0.00228915
	DCLRE1A	1985.5	1111.66	0.579333	-0.787535	0.000213467	0.00229104
	HCP5	222.134	478.764	2.00391	1.00282	0.000213514	0.00229104
	ICAM1	12.0823	75.3174	3.12204	1.64249	0.00021523	0.00230748
	CTDSPL2	2212.3	1195.61	0.567965	-0.816127	0.000215515	0.00230857
	GTF3A	3601.11	6187.39	1.73179	0.792265	0.000218235	0.00233372
	OTUB2	735.253	1361.49	1.7922	0.841729	0.000218124	0.00233372
	LOC100507459	64.2699	190.931	2.46227	1.29999	0.000222042	0.00237242
	OAT	5289.39	2809.69	0.561824	-0.83181	0.00022241	0.00237433
	LOXL3	555.988	268.462	0.511588	-0.966946	0.000223662	0.00238566
	ALDH9A1	2405	1311.53	0.569475	-0.812295	0.000230518	0.0024567
	SYCE2	96.5254	21.2388	0.344087	-1.53915	0.00023116	0.00246146
	MTERFD1	3353.56	1884.95	0.57918	-0.787917	0.000231701	0.00246513
	MFSD3	1128.69	2042.51	1.76633	0.820755	0.000233957	0.00248704
	HTATSF1	5303.13	3050.92	0.593786	-0.751985	0.000234444	0.0024901
	ADCK2	1857.24	994.835	0.556074	-0.846652	0.000238403	0.00252787
	ADORA2B	5726.41	9860.68	1.68507	0.752808	0.000238304	0.00252787
	INF2	2916.43	1684.66	0.59293	-0.754065	0.000238808	0.00253004
	GGA2	4984.74	2819.64	0.588642	-0.764537	0.000240993	0.00255103
	TUBB4A	1956.36	1017.56	0.556179	-0.846379	0.000241403	0.00255322
	EDC4	3292.11	1913.82	0.590806	-0.759245	0.000242512	0.00255635
	GAS5	2022.33	3497.67	1.72261	0.7846	0.00024233	0.00255635
	SFPQ	14766.1	8485.65	0.587544	-0.76723	0.000242178	0.00255635
	STARD10	2470.07	4294.98	1.68366	0.751605	0.000242024	0.00255635
	ZBTB22	847.107	1556.88	1.75886	0.814641	0.000242768	0.0025569
	TIMM8B	2320.8	4004.61	1.72059	0.782907	0.00024378	0.0025654
	EIF5B	13635.1	8187.34	0.612178	-0.707978	0.000244135	0.002567
	C12orf76	133.065	317.701	2.14782	1.10288	0.000246729	0.00259209
	RNF26	4718.39	2765.7	0.601394	-0.733617	0.000247347	0.00259425
	UNC13B	1879.08	3260.27	1.69807	0.763895	0.000247188	0.00259425
	YBX3P1	1020.88	2036.38	1.79853	0.846818	0.000247631	0.00259507
	ANXA5	13606.7	7872.56	0.596636	-0.745077	0.000249217	0.00260951
	NUDC	38187.4	22639	0.609528	-0.714235	0.000251753	0.00263387
	NFYB	1880.61	1031.04	0.570795	-0.808956	0.000252753	0.00264213
	PKM	65836.9	37153.4	0.575259	-0.797716	0.00025353	0.00264805
	HOOK1	1005.53	530.809	0.545938	-0.87319	0.000256238	0.00267374
	WBSCR27	592.813	1138.22	1.81046	0.856357	0.000256552	0.00267374
	ZNF791	280.105	574.089	1.94829	0.962209	0.000256628	0.00267374
	TMEM242	1905.1	3294.81	1.69197	0.758705	0.000257038	0.00267579
	TMEM68	1052.25	1869.21	1.72332	0.785189	0.00025893	0.00269326
	PDHA1	6128.72	3381.42	0.570117	-0.810671	0.000260132	0.00270353
	ANKRD29	115.302	297.209	2.2629	1.17817	0.000260511	0.00270523
	CCNJ	784.55	1446.6	1.82372	0.866887	0.000261461	0.00271285
	SERTAD1	1725.86	2986.31	1.72093	0.783188	0.000262709	0.00272355
	PPM1D	2214.07	4042.58	1.75855	0.814384	0.00026567	0.00275197
	BSG	43435.9	26043.9	0.616093	-0.698779	0.000266673	0.00276009
	CDC27	5692.67	3334.83	0.604335	-0.726579	0.000268372	0.00277538
	ILVBL	4316.84	2398.6	0.577763	-0.791449	0.000268765	0.00277716
	VPS35	4762.52	2571.19	0.571752	-0.80654	0.000269913	0.00278674
	AHSA2	296.452	119.23	0.45645	-1.13147	0.000272622	0.00281239
	HNRNPH3	11683.1	6832.97	0.594222	-0.750925	0.000274813	0.00283267
	SMARCA4	5597.58	3312.37	0.606534	-0.72134	0.000275265	0.00283501
	GJB3	3767.43	6731.87	1.72035	0.782705	0.000278698	0.00286801
	RCC1	22852.8	13628.1	0.610085	-0.712919	0.000280828	0.00288757
	PLEKHH3	2865.53	1662.69	0.596763	-0.744771	0.000282608	0.00290349
	HGS	9136.75	5338.26	0.594326	-0.750674	0.000284961	0.00292528
	GUSB	1931.81	1050.79	0.554956	-0.849556	0.000287119	0.00294502
	MAX	3369.56	6022.27	1.73085	0.791483	0.000289493	0.00296695
	NUAK1	652.15	1196.1	1.76257	0.817684	0.000291863	0.00298637
	ZBED5-AS1	183.073	428.766	2.14254	1.09932	0.000291772	0.00298637
	TUBA1A	3055.77	1501	0.531158	-0.912788	0.000293345	0.00299908
	PHLPP1	566.258	278.012	0.522107	-0.937583	0.000293874	0.00299962
	RWDD2B	1984.44	3412.7	1.67366	0.743005	0.00029376	0.00299962
	TCP11L1	347.398	734.059	1.93332	0.951084	0.000294408	0.00300262
	SSFA2	33960.2	55976.6	1.61163	0.688524	0.000294647	0.00300263
	SLC2A12	76.5121	217.122	2.40999	1.26903	0.000295262	0.00300645
	DYNC1LI1	4340.66	2493.26	0.576854	-0.793723	0.000295969	0.00301052
	GNB1L	425.917	196.345	0.498662	-1.00387	0.00029614	0.00301052
	CASP2	3345.51	1938.36	0.598946	-0.739501	0.000296993	0.00301675
	PLCL2	203.033	439.31	2.00156	1.00112	0.000297939	0.00302391
	KIF26A	1263.8	676.472	0.561703	-0.832121	0.000298468	0.00302601
	NONO	14324.7	7794.17	0.574791	-0.79889	0.000298868	0.00302601
	ZNF655	1978.04	3587.05	1.76236	0.817506	0.000298785	0.00302601
	SUGCT	108.64	274.614	2.22193	1.15181	0.000299979	0.00303481
	LOC101927045	97.0663	255.908	2.35235	1.2341	0.000302545	0.0030583
	LONP1	11195.3	6677.47	0.611409	-0.709791	0.00030416	0.0030697
	SMTNL2	162.436	365.799	2.07198	1.05101	0.00030401	0.0030697
	GRK5	401.779	780.069	1.83783	0.878	0.000306169	0.00308749
	PROCR	5289.94	9107.34	1.66124	0.732262	0.000307809	0.00310034
	SLC35E2B	449.329	866.92	1.82651	0.86909	0.000307936	0.00310034
	ST6GAL1	623.458	1145.14	1.76791	0.822042	0.000308311	0.00310162
	LINC00493	2189.65	3827.06	1.70169	0.766966	0.000310161	0.00311773
	ZNF70	164.46	371.08	2.06451	1.0458	0.000310505	0.0031187
	SNRPB	40561.9	24592	0.620111	-0.689401	0.000311141	0.0031226
	UBE2D4	551.78	1044.75	1.86981	0.902891	0.000312277	0.00313149
	EMC3-AS1	647.551	319.799	0.528175	-0.920913	0.000312808	0.0031329
	FAM188A	1261.7	2290.53	1.75079	0.808008	0.000312916	0.0031329
	ARVCF	708.801	1285.21	1.74645	0.804422	0.000314863	0.00314989
	FARP1	1244.03	677.892	0.569179	-0.813045	0.000315797	0.00315671
	PRPF19	15915.3	8807.15	0.573222	-0.802835	0.000316216	0.00315839
	HNRNPL	25148.8	14047.3	0.592549	-0.754993	0.000318804	0.00318171
	SLC29A3	548.267	1018.94	1.78182	0.83335	0.0003201	0.00319211
	RHOBTB2	1702.05	960.778	0.58446	-0.774825	0.000321683	0.00320535
	COLGALT1	12377.3	7315.53	0.610451	-0.712054	0.000323007	0.00321599
	NUDT16	1461.54	2558.5	1.68433	0.752174	0.000324063	0.00322395
	HSP90B1	27580.6	16496.9	0.612131	-0.708088	0.000324686	0.00322759
	AP1B1	5413.89	3100.56	0.592896	-0.754148	0.000327931	0.00325727
	HYLS1	1817.56	990.594	0.5723	-0.805157	0.0003283	0.00325836
	SLC30A1	220.164	486.142	1.99981	0.999861	0.000334746	0.00331972
	CSPG5	337.467	143.004	0.470272	-1.08843	0.000335609	0.00332565
	PLCB1	126.7	313.188	2.20491	1.14072	0.00033648	0.00333165
	CENPP	838.945	442.566	0.552517	-0.85591	0.000338502	0.00334903
	UBL3	549.267	1058.63	1.85532	0.891665	0.000341104	0.00337213
	FGFR3	1454.98	816.812	0.578725	-0.78905	0.000342158	0.00337988
	ZNF28	283.962	588.231	1.93697	0.953804	0.000342689	0.00338247
	AGPAT2	6796.41	3874.58	0.59005	-0.761092	0.000347498	0.00342724
	RSPO4	12.0011	80.9321	3.06219	1.61457	0.000349374	0.00344305
	CDKN2D	1186.04	654.541	0.571383	-0.807471	0.000350712	0.00345082
	ZNF252P	674.298	1228.49	1.74965	0.807065	0.000350568	0.00345082
	ALDH16A1	810.734	415.632	0.532008	-0.910481	0.000351356	0.00345445
	CYS1	92.325	244.74	2.26882	1.18194	0.000352538	0.00346337
	NEU3	160.616	360.734	2.05131	1.03655	0.000352916	0.00346437
	PRPF3	1851.38	1058.83	0.582774	-0.77899	0.000353699	0.00346934
	MIEN1	4896.84	10032.1	1.84654	0.884826	0.000355934	0.00348854
	SLC27A5	409.218	796.805	1.89794	0.924431	0.000357242	0.00349863
	GJC1	3184.33	1842	0.596707	-0.744905	0.000358366	0.00350691
	MVD	5001.99	2977.64	0.611258	-0.710147	0.000359221	0.00351254
	XAB2	3518.84	2007.88	0.575791	-0.796384	0.000363398	0.00355062
	C5orf24	1963.42	3337.66	1.65612	0.727809	0.000364535	0.0035567
	KLK8	2572.18	4483.58	1.68623	0.753805	0.000364587	0.0035567
	EHMT2	4794.59	2801.22	0.600773	-0.735109	0.000366168	0.00356936
	ZNF276	2408.42	4069.64	1.66187	0.732809	0.00036656	0.00357041
	TOMM40	19957.3	12115.8	0.622305	-0.684306	0.000366964	0.00357158
	NTN4	59.5629	175.78	2.41173	1.27007	0.000367625	0.00357524
	C12orf73	674.555	1236.22	1.8064	0.853114	0.00036996	0.00359239
	OXCT1	2470.81	1385.92	0.580201	-0.785376	0.000369874	0.00359239
	PMP22	5176.81	3038.24	0.610319	-0.712364	0.000370365	0.00359354
	PPP1R15A	2344.93	4234.5	1.75375	0.810442	0.000372485	0.00360854
	PSMC3	21603.1	12003.7	0.583647	-0.776831	0.000372335	0.00360854
	ILF3	14799	8952.03	0.619323	-0.691236	0.000373767	0.00361817
	RHOQ	1089.03	1955.57	1.73197	0.792413	0.000374162	0.0036192
	NUP35	2406.59	1356.71	0.561385	-0.832938	0.000374815	0.00362273
	RPS6KA2	219.497	515.435	2.09162	1.06462	0.000376364	0.00363491
	LINC00663	27.5018	110.838	2.72684	1.44723	0.000376803	0.00363636
	LOC150381	284.116	598.688	2.0765	1.05416	0.000377935	0.00364447
	CECR7	267.78	550.889	1.96049	0.971215	0.000379788	0.00365954
	CKAP4	7364.88	4411.42	0.616901	-0.696889	0.000388566	0.00374125
	SCAF1	6422.19	3868.07	0.617077	-0.696477	0.000391637	0.00376794
	DDX24	8109.09	4599.95	0.59004	-0.761115	0.000393333	0.00377994
	METTL21B	201.08	429.382	1.98037	0.985767	0.000393487	0.00377994
	LYPD6	189.664	66.4699	0.419805	-1.25221	0.000394309	0.00378495
	RAD1	2174.84	1246.32	0.591766	-0.756902	0.000395183	0.00379044
	GOLT1A	221.29	483.089	2.03439	1.0246	0.000396324	0.00379849
	TUBD1	860.633	430.46	0.531022	-0.913156	0.00039999	0.00383069
	DBNDD1	4503.49	8101.91	1.74489	0.803139	0.000400842	0.00383447
	SKP2	2449.67	1427.1	0.600591	-0.735546	0.000400994	0.00383447
	YWHAH	16403.8	9951.41	0.621345	-0.686533	0.000401641	0.00383773
	TSKU	1884.54	3189.24	1.64758	0.720348	0.000402533	0.00384333
	PDGFA	1396.05	2412.95	1.6708	0.740537	0.00040335	0.00384821
	DDX18	5529.98	3071.8	0.57331	-0.802613	0.000404218	0.00385064
	UBB	107177	62392.3	0.614507	-0.702498	0.000404174	0.00385064
	DSC3	494.173	918.44	1.77933	0.831335	0.000404972	0.00385491
	MMP24-AS1	2807.75	4993.48	1.7278	0.788937	0.00040896	0.00388992
	KIAA2018	608.601	1144.61	1.80782	0.854255	0.000422608	0.00401168
	MBD3	9604.85	5515.39	0.597455	-0.743097	0.000422537	0.00401168
	NAPB	338.591	658.355	1.84434	0.883107	0.000422719	0.00401168
	FZR1	3999.03	2276.61	0.590794	-0.759273	0.000423411	0.00401219
	SESN2	1242.22	2292.85	1.78535	0.836207	0.000423217	0.00401219
	DDX23	9915	5759.01	0.601392	-0.733622	0.000428099	0.00405356
	CPSF6	7387.97	4186.33	0.576982	-0.793402	0.000431872	0.00408312
	PHRF1	3978.06	2389.83	0.61016	-0.712741	0.000431743	0.00408312
	SMKR1	198.006	439.148	2.07229	1.05123	0.000433291	0.00409346
	PDIA3	16286.3	8874.36	0.582464	-0.77976	0.000435226	0.00410866
	ARHGEF3	634.712	1209.49	1.79766	0.846122	0.000438707	0.0041384
	GRIN2C	13.2061	80.3773	2.98767	1.57902	0.000444446	0.00418939
	PYGB	3907.9	2185.09	0.581348	-0.782525	0.000447313	0.00421326
	AHNAK2	183.02	407.978	2.0066	1.00475	0.000454093	0.00427392
	GATC	2782.35	4635.2	1.62314	0.698789	0.000455273	0.00428181
	ZNF397	299.334	593.268	1.88084	0.911375	0.00045732	0.00429785
	SDHA	5305.82	2700.56	0.552518	-0.855908	0.000458422	0.00430499
	GTF2IRD1	1753.73	931.27	0.576034	-0.795775	0.000461029	0.00432624
	IFT20	751.449	1333.14	1.71372	0.77713	0.000462335	0.00433499
	LRRC75A-AS1	14159.9	22683	1.62619	0.701494	0.000462652	0.00433499
	UBE2H	6037.29	9880.61	1.60182	0.679716	0.000463818	0.00434268
	HNRNPUL1	18244	11104.5	0.623867	-0.680689	0.000469151	0.00438934
	NAA15	5142.27	3060.31	0.603574	-0.728397	0.00047209	0.00440699
	RANBP3	4990.57	2983.93	0.611821	-0.708818	0.000471687	0.00440699
	ZBED8	334.482	149.328	0.488615	-1.03323	0.000471946	0.00440699
	FH	4172.45	2314.95	0.568128	-0.815711	0.000474	0.00442153
	SYNC	73.9717	200.545	2.32706	1.21851	0.00047525	0.00442991
	STARD8	290.125	118.414	0.469064	-1.09214	0.000480369	0.0044743
	TTF2	1873.81	1087.28	0.597344	-0.743366	0.000485167	0.00451565
	GSPT1	12134.8	7161.44	0.601463	-0.733453	0.000488929	0.00454729
	PLAU	2451.18	4102.79	1.64045	0.714093	0.000489378	0.0045481
	LGALS3BP	13672.3	8088.11	0.600973	-0.734628	0.000493874	0.00458649
	OSER1-AS1	61.5328	177.462	2.3596	1.23854	0.000496148	0.00460421
	NUP153	3059.57	1821.78	0.610999	-0.710759	0.00049665	0.00460546
	ALDOA	105600	63075.4	0.611936	-0.708547	0.0005014	0.00464609
	DEXI	2673	4412.65	1.64818	0.720876	0.000502458	0.00465245
	EREG	17511.9	28786.4	1.60732	0.684655	0.000502851	0.00465267
	KLHL22	387.176	173.788	0.490261	-1.02838	0.000504047	0.0046603
	ADM5	331.41	147.89	0.490554	-1.02752	0.000506704	0.00468143
	SHMT2	8185.94	4673.66	0.594294	-0.750752	0.000510244	0.00471067
	PCMTD2	876.264	1539.13	1.70635	0.77091	0.000512122	0.00472453
	TTI2	1825.97	995.974	0.569537	-0.81214	0.000516873	0.00476487
	PGK1	20077.3	10873.9	0.563177	-0.82834	0.00051901	0.00478106
	G3BP1	6621.63	3626.73	0.580256	-0.785238	0.000520507	0.00479133
	TUBB2A	2308.97	1262.04	0.574622	-0.799316	0.000523251	0.00481306
	TERT	293.867	120.909	0.473443	-1.07874	0.000526646	0.00484075
	REEP1	384.978	179.405	0.503154	-0.990929	0.00052968	0.00486153
	SMCO4	1244.11	626.268	0.539865	-0.889329	0.000529656	0.00486153
	CEL	12.0011	79.2881	2.9667	1.56886	0.000534009	0.00489769
	FAM96A	3070.45	5241.08	1.7203	0.782657	0.000539439	0.00493308
	ILK	5112.4	3087.15	0.618289	-0.693646	0.000539233	0.00493308
	LIN9	466.295	207.624	0.481065	-1.0557	0.000538954	0.00493308
	MYPOP	991.56	1878.11	1.78088	0.83259	0.000539219	0.00493308
	PRMT6	673.228	1199.1	1.72333	0.785195	0.00054003	0.00493489
	APOLD1	103.07	25.5812	0.371864	-1.42715	0.00054128	0.00494014
	SAFB2	2505.79	1476.49	0.590694	-0.759517	0.000541391	0.00494014
	HNRNPA3	10906.2	6291	0.604973	-0.725058	0.000545303	0.00497223
	LOC654342	139.857	317.969	2.05117	1.03645	0.000548022	0.00498978
	PAK6	2820.16	1671.01	0.60562	-0.723516	0.0005477	0.00498978
	HCG11	26.6877	108.509	2.69068	1.42797	0.00054977	0.00500207
	NAP1L4	15431.4	9467.82	0.628051	-0.671046	0.000551124	0.00501077
	NOLC1	23031.4	12955.2	0.577806	-0.791342	0.000553338	0.00502725
	CLUHP3	60.7531	172.716	2.36358	1.24097	0.000553835	0.00502813
	MED16	4646.39	2741.88	0.604031	-0.727306	0.000554367	0.00502933
	PHACTR2	779.244	1386.52	1.71433	0.777642	0.00055625	0.00504277
	RUSC1	5542.39	3363.56	0.620882	-0.687609	0.000558017	0.00505515
	C6orf1	368.232	720.628	1.89432	0.921683	0.000558991	0.00506032
	AK1	3892.34	6429.71	1.62279	0.698473	0.000560706	0.00506854
	CDK5RAP1	3416.92	1883.76	0.580017	-0.785832	0.000560335	0.00506854
	TMA7	1957.54	3571.07	1.76356	0.818494	0.000562406	0.00508025
	COL4A5	165.613	362.009	1.99693	0.99778	0.000567972	0.00512685
	KAT5	5769.67	3358.03	0.612313	-0.707659	0.000569355	0.00513564
	C5orf28	567.539	1061.83	1.82129	0.864964	0.00057085	0.00514543
	BAG1	5409.22	9020.46	1.66059	0.731697	0.000571364	0.00514637
	CCT6A	28073.7	16474.3	0.605086	-0.724788	0.000576742	0.00519109
	MYC	12081.3	20171.9	1.61613	0.692544	0.000580726	0.00521685
	RCCD1	2004.23	1179.26	0.60174	-0.732787	0.000580338	0.00521685
	RSG1	233.173	476.24	1.90673	0.931101	0.00058085	0.00521685
	LSM10	1464.69	2432.74	1.68402	0.751911	0.000581937	0.00521915
	ZNF326	1756.77	994.838	0.584947	-0.773621	0.000581662	0.00521915
	SRSF1	36171.2	22462.5	0.63259	-0.660658	0.000582892	0.00522399
	RBM25	4421.07	2685.24	0.621355	-0.686509	0.000590305	0.00528666
	SGTA	13697.5	8461.02	0.632094	-0.66179	0.000592724	0.00530454
	LETM1	5746.83	3454.29	0.615887	-0.699263	0.000593303	0.00530594
	PRIMPOL	560.152	285.361	0.540014	-0.888931	0.000604525	0.00540245
	U2AF2	41352.7	25514.9	0.627176	-0.673059	0.000605351	0.005406
	THOP1	9430.45	5794.97	0.625937	-0.67591	0.00060673	0.00541446
	DUSP16	683.997	1212.89	1.70574	0.770395	0.000618475	0.00549744
	HLTF	1550.94	887.503	0.594939	-0.749187	0.000618653	0.00549744
	IFNAR1	2265.32	3765.59	1.62209	0.69785	0.000618448	0.00549744
	RAD51C	5318.77	3243.89	0.623906	-0.6806	0.000617533	0.00549744
	ZNF383	118.216	277.449	2.10364	1.07289	0.000617301	0.00549744
	ZW10	1516.55	849.798	0.576272	-0.795179	0.000618173	0.00549744
	SGCE	859.14	468.563	0.569641	-0.811875	0.000622655	0.00552909
	ASIC1	1438.59	2521.52	1.6634	0.734136	0.000626593	0.00555668
	CCDC71L	748.078	1354	1.7207	0.782999	0.000627089	0.00555668
	PEX2	2607.82	4313.03	1.61313	0.689864	0.000626661	0.00555668
	CRIPT	1341.99	2295.25	1.6645	0.735086	0.000630193	0.00557632
	FAM134B	119.013	279.11	2.09203	1.0649	0.000630063	0.00557632
	FERMT2	1010.39	531.367	0.555196	-0.848931	0.000637395	0.00563489
	KCTD11	629.233	1117.89	1.7262	0.787596	0.000637709	0.00563489
	MSI2	1156.37	1968.41	1.66217	0.733067	0.000639195	0.00564405
	ELFN1-AS1	2265.83	3824.25	1.73212	0.792538	0.000641204	0.00565782
	CEP41	655.925	332.361	0.538581	-0.892765	0.000643409	0.00567329
	MFI2	2049.61	1208.81	0.607455	-0.719152	0.000645775	0.00569015
	NCOA5	3365.28	1882.76	0.592845	-0.754273	0.000647009	0.00569704
	SLC27A3	367.296	168.437	0.499078	-1.00266	0.000649057	0.00571107
	NIF3L1	3272.91	1875.46	0.596378	-0.745702	0.000650998	0.00572414
	OLFM2	408.451	814.637	1.9002	0.926154	0.000654074	0.00574716
	NOL11	6375.56	3737.72	0.597206	-0.743699	0.000655111	0.00575225
	ACOT7	9832.25	6081.87	0.632503	-0.660856	0.000656744	0.00576256
	UQCRC1	13941	8562.42	0.627503	-0.672307	0.00065722	0.00576272
	BBS9	142.459	317.739	2.02741	1.01964	0.000659344	0.00577731
	KCNK5	775.014	419.512	0.563583	-0.827299	0.000661293	0.00579035
	MREG	835.402	1485.16	1.75961	0.815259	0.000662289	0.00579503
	FGFR1	4091.52	2494.31	0.622511	-0.683829	0.000663947	0.00580549
	PUSL1	2921.32	1703.95	0.60573	-0.723253	0.00066812	0.00583386
	SRRD	3694.15	6344.44	1.63752	0.71151	0.00066804	0.00583386
	NUCKS1	20842.7	12985.7	0.636711	-0.65129	0.000670343	0.0058492
	PCED1A	548.156	997.127	1.74823	0.805892	0.000674535	0.0058817
	NUP50	5927.11	3599.13	0.623664	-0.68116	0.000676695	0.00589644
	ANAPC4	1900.25	1105.46	0.598234	-0.741218	0.000679247	0.00591458
	ZNF534	379.884	179.757	0.511793	-0.966368	0.000685918	0.00596853
	ACTN4	7388.34	4562.18	0.62827	-0.670543	0.000688312	0.00598178
	NMRK1	113.28	289.111	2.14674	1.10215	0.000688393	0.00598178
	LINC00963	321.465	632.286	1.87957	0.910406	0.000689326	0.00598575
	HSPA4	10632.5	6055.95	0.578151	-0.790481	0.000691456	0.0060001
	MCC	922.375	1686.11	1.76029	0.815814	0.000698576	0.00605415
	MYEOV2	2746.5	4854.79	1.70591	0.770546	0.000698648	0.00605415
	KLHDC7A	47.0725	149.9	2.50464	1.3246	0.000700014	0.0060618
	LINC00294	288.307	563.095	1.8402	0.879865	0.00070097	0.0060659
	GMPPB	1762.96	1008.11	0.586882	-0.768857	0.000701739	0.00606837
	ACADVL	10340.3	5968.3	0.616498	-0.697831	0.000702713	0.00607262
	STT3A	5911.05	3383.89	0.593825	-0.751889	0.000704244	0.00608167
	MYO19	7795.85	4820.4	0.63243	-0.661021	0.000705579	0.00608819
	PLEKHG3	2136.19	1267.4	0.610406	-0.712159	0.000705968	0.00608819
	RPARP-AS1	675.751	1209.98	1.72701	0.788274	0.000710385	0.00611788
	SCAMP1-AS1	77.8842	204.592	2.29408	1.19792	0.000710117	0.00611788
	CXorf57	249.255	79.567	0.414541	-1.27041	0.000716412	0.00616556
	ZFAS1	5658.7	9130.66	1.62323	0.698872	0.0007294	0.00627304
	ZNF165	818.843	424.95	0.533928	-0.905282	0.000732205	0.00629285
	MGME1	4060.72	2394.96	0.603435	-0.728731	0.000738588	0.00634337
	CBX5	5261.77	3222.92	0.629094	-0.668653	0.000742307	0.00637096
	TRIM47	5332.15	3276.65	0.629348	-0.668071	0.00074345	0.00637641
	ARHGEF1	6283.34	3749.1	0.609507	-0.714286	0.000745149	0.00638663
	FAM78A	217.867	474.456	1.95819	0.96952	0.000748581	0.00641167
	S100A13	4086.97	6747.15	1.63565	0.709866	0.000755042	0.0064626
	CTNNBL1	3632.84	2055.33	0.590266	-0.760563	0.000755686	0.00646372
	DTD2	642.632	1199.08	1.78027	0.832095	0.000759516	0.00649205
	ATG4B	3851.9	2353.68	0.624878	-0.678353	0.000765205	0.00653624
	CABLES2	1083.76	612.569	0.584576	-0.774536	0.0007661	0.00653943
	LPIN3	242.649	487.638	1.88002	0.910751	0.0007696	0.00656106
	SAAL1	3504.76	2101.14	0.618321	-0.693572	0.000769678	0.00656106
	MFAP3L	447.964	828.916	1.75805	0.813972	0.000771286	0.00657031
	CHD4	12006.6	7461.89	0.636637	-0.651456	0.000775119	0.00659849
	GDA	4025.07	2171.48	0.589726	-0.761883	0.000781513	0.00664841
	LURAP1L	48.0192	151.471	2.43498	1.28391	0.000786686	0.00668596
	MMP15	4368.14	2664.24	0.627426	-0.672482	0.000787567	0.00668596
	SMARCB1	10990.7	6846.35	0.636375	-0.652051	0.000787157	0.00668596
	TAF1A	1360.04	774.881	0.584668	-0.77431	0.000788055	0.00668596
	PDLIM7	7868.19	4884.42	0.635111	-0.654919	0.000788605	0.00668611
	EMR2	240.337	503.93	1.91783	0.939473	0.000791045	0.00670228
	MBP	2044.05	3386.99	1.6259	0.701238	0.000792302	0.00670389
	S100A11	11390.9	18487.3	1.6093	0.686435	0.000792138	0.00670389
	RBM10	7623.63	4636.44	0.617674	-0.695082	0.000796574	0.0067355
	LINC00094	756.761	1385.43	1.75331	0.810079	0.000798053	0.00673894
	RSBN1L	1260.85	723.823	0.592738	-0.754532	0.00079799	0.00673894
	XPR1	1381.49	2316.86	1.63943	0.713197	0.000804238	0.0067866
	CMTM7	4829.24	8344.08	1.63207	0.706705	0.000809378	0.00682108
	FKBP14	428.437	785.628	1.75455	0.811102	0.000809409	0.00682108
	HNRNPDL	15402.3	9458.55	0.608772	-0.716026	0.000812991	0.00684383
	SAMD4A	333.983	645.371	1.82191	0.86545	0.000813743	0.00684383
	TSPAN12	273.633	567.411	1.87157	0.904246	0.000813384	0.00684383
	MVK	1924.94	1143.34	0.61058	-0.711747	0.000817702	0.00687252
	SCML2	218.206	84.1737	0.453614	-1.14046	0.000819284	0.00688122
	SNRPA	10900.6	6486.79	0.61533	-0.700568	0.000822092	0.00690019
	EIF4G1	21725.3	13656.3	0.641801	-0.639801	0.00082775	0.00694304
	RC3H2	592.469	1052.57	1.73709	0.796675	0.000829845	0.00695597
	PRPF38B	3324.74	1990.72	0.621818	-0.685435	0.000831433	0.00696464
	KLHL21	4089.92	2508.5	0.622828	-0.683094	0.000835477	0.00699385
	ANAPC13	3166.51	5498.26	1.7037	0.768672	0.000839821	0.00702086
	HNRNPA1	4286.11	2549.33	0.614228	-0.703155	0.000839334	0.00702086
	SPAG9	2684.96	1595.9	0.6068	-0.720707	0.000841797	0.0070327
	CEP85	1965.7	1144.04	0.604472	-0.726252	0.000844316	0.00703724
	DNAJC2	5852.37	3611.16	0.633636	-0.658273	0.000843815	0.00703724
	EHBP1	1455.32	2411.38	1.61783	0.694061	0.000845141	0.00703724
	LRP10	2406.16	4025.28	1.6112	0.688132	0.000844092	0.00703724
	TYRO3	4163.43	2564.27	0.627759	-0.671718	0.000845034	0.00703724
	SLC25A30	1568.85	2602.04	1.61426	0.690874	0.00084723	0.00704996
	POC5	910.292	495.678	0.554664	-0.850315	0.000854194	0.00710321
	SNW1	6420.75	3738.1	0.595195	-0.748566	0.000855724	0.00711122
	TFDP2	1550.77	2589.36	1.62811	0.7032	0.00085679	0.00711538
	SH3BGRL2	444.246	813.609	1.76051	0.815994	0.000859105	0.00712989
	GPS1	18174.2	11097.9	0.63142	-0.663328	0.00086426	0.00716794
	SLC35D2	1398.55	2415.67	1.68363	0.751572	0.000865569	0.00717406
	ELL2	958.636	1628	1.65743	0.728949	0.00086624	0.00717489
	SLC43A2	874.559	1513.48	1.67152	0.741162	0.000869835	0.00719992
	VCAN	647.084	1135.66	1.68835	0.755617	0.000872508	0.00721729
	SNCG	1218.15	2172.1	1.72702	0.788285	0.000883947	0.0073071
	ZYX	18036.4	11094.8	0.632928	-0.659886	0.000885031	0.00731125
	AP2A1	4824.2	2925.27	0.625774	-0.676286	0.000888081	0.00733162
	MAP3K12	386.234	713.099	1.76145	0.816767	0.000890935	0.00734554
	ZNF271	757.612	1303.44	1.67874	0.747379	0.000890927	0.00734554
	SLCO4A1	2514.22	1527.5	0.611645	-0.709235	0.000893887	0.00736504
	HADH	2940.11	1723.53	0.607	-0.720232	0.000895648	0.00737472
	PTPN4	515.913	920.871	1.71467	0.777929	0.000898014	0.00738452
	TPM3	26080.7	16238.4	0.641452	-0.640586	0.000897946	0.00738452
	PTRH1	893.677	1514.94	1.65402	0.725979	0.000898754	0.00738577
	TM2D1	802.043	1380.01	1.66971	0.739593	0.00090289	0.00741491
	LRRC8C	1101.78	578.893	0.554226	-0.851454	0.00090409	0.00741992
	ZNF775	590.613	296.57	0.538719	-0.892394	0.000906059	0.00743122
	OR51B2	44.4041	140.384	2.4074	1.26747	0.000910291	0.0074562
	SLC6A17	1229.01	704.231	0.59399	-0.751489	0.000909879	0.0074562
	EFTUD2	7554.24	4361.27	0.59843	-0.740745	0.00091368	0.00747908
	EDARADD	5890.27	3243.17	0.547872	-0.86809	0.000921217	0.00753586
	TCHP	1846.46	1082.76	0.603946	-0.727509	0.000923899	0.00755289
	FHL1	646.676	343.41	0.560966	-0.834014	0.000927279	0.00757559
	C2orf68	760.232	1323.62	1.66923	0.73918	0.000933994	0.00762549
	DUSP11	2198.79	3595.61	1.61005	0.687108	0.000935773	0.00763506
	COG4	3693.7	2022.35	0.585202	-0.772993	0.000938228	0.00764809
	RBM18	2570.36	4316.49	1.64983	0.722314	0.000938588	0.00764809
	FAHD2CP	175.612	368.129	1.93172	0.949888	0.00094021	0.00765139
	GAS6-AS1	98.987	238.076	2.15318	1.10647	0.000939828	0.00765139
	CAND1	3439	2103.43	0.628099	-0.670937	0.00094119	0.0076544
	SAE1	25549.6	16174.7	0.645194	-0.632196	0.000944033	0.00767256
	FBXO41	2933.9	5064.89	1.66295	0.733741	0.000945702	0.00768115
	GJA3	704.161	1219.77	1.67285	0.742308	0.000946774	0.00768489
	PSMD12	10514.3	6203.99	0.606177	-0.72219	0.000948005	0.00768991
	CUL1	5060.47	3069.76	0.612833	-0.706434	0.000950731	0.00770705
	PCMTD1	214.04	431.563	1.87968	0.910489	0.000951716	0.00771006
	CD9	8858.86	5486.75	0.635003	-0.655165	0.000958004	0.00775101
	DDX3X	10082.2	5580.24	0.57255	-0.804527	0.000957742	0.00775101
	SORT1	1710.1	965.914	0.59472	-0.749718	0.000962547	0.00777775
	VTI1B	1974.29	3208.21	1.59347	0.672173	0.000962446	0.00777775
	SLC8A2	33.4777	120.087	2.50944	1.32737	0.000971678	0.00784325
	TNIP1	3973.1	6372.33	1.5674	0.648374	0.000971902	0.00784325
	TUBA4B	125.508	34.4375	0.391614	-1.3525	0.000972731	0.00784491
	CYP4F11	674.473	1182.45	1.69091	0.757804	0.000977305	0.00787674
	PEX26	2012.85	3423.9	1.65902	0.730333	0.000978098	0.00787808
	SIVA1	6586.45	3459.36	0.583026	-0.778368	0.000984282	0.00792281
	PAQR5	1047.98	1771.91	1.64048	0.714115	0.000985773	0.00792973
	SPPL3	3364.85	5405.32	1.57002	0.650781	0.000994374	0.0079938
	PCSK9	1304.34	727.062	0.586905	-0.768802	0.0010025	0.00805398
	HP1BP3	7046.09	4086.88	0.612933	-0.706199	0.00100527	0.00807104
	EOMES	165.256	349.223	1.94157	0.95722	0.00101231	0.00811208
	FOXRED2	1696.94	996.462	0.607885	-0.718129	0.00101206	0.00811208
	GALNT11	1745.11	3018.35	1.68297	0.751007	0.00101189	0.00811208
	LOC646762	576.727	1015.23	1.69238	0.759056	0.00101359	0.00811715
	SET	43465.6	27685.8	0.647727	-0.626543	0.00101728	0.0081415
	PNPLA4	993.153	1801.76	1.76896	0.822901	0.0010189	0.00814925
	ZSCAN2	575.205	1028.45	1.72963	0.790468	0.00102489	0.00819196
	OST4	3523.29	5713.1	1.66233	0.733203	0.00103521	0.00826919
	DUSP9	1005.58	571.689	0.591578	-0.757359	0.00103664	0.00827146
	PTPRU	3370.24	5485.71	1.60862	0.685826	0.00103681	0.00827146
	GAS7	142.216	319.104	2.00193	1.00139	0.00104817	0.00835673
	LOC148413	1802.72	3012.69	1.62771	0.702847	0.00104973	0.00836392
	SEC11C	3224.34	5244.8	1.6054	0.682936	0.00105534	0.00840328
	TBL3	2626.52	1515.09	0.584554	-0.774593	0.00105692	0.00841052
	DHX38	4549.03	2788.29	0.62841	-0.670222	0.00105776	0.00841188
	CHCHD7	862.351	1498.25	1.71993	0.782351	0.00106364	0.00845327
	MICB	3548.77	2133.6	0.626038	-0.675678	0.00106474	0.00845666
	LINC01278	316.869	606.464	1.80363	0.850903	0.00107318	0.00851828
	ATG4A	675.238	1169.54	1.67487	0.744049	0.00107604	0.00853566
	RALY	14812.5	9396.07	0.646388	-0.629528	0.00108152	0.00857292
	SOX12	4571.15	7457.9	1.57633	0.656574	0.00108211	0.00857292
	EXOSC10	4068.62	2387.59	0.603867	-0.727697	0.00108295	0.00857421
	ATXN7L1	263.051	510.767	1.83035	0.872122	0.00108399	0.00857707
	UBA1	9613.38	5856.04	0.622746	-0.683284	0.00108516	0.00858093
	FAM86C1	549.066	986.766	1.71795	0.780691	0.00108707	0.00858516
	XPC	1572.14	2749.01	1.70027	0.765766	0.00108676	0.00858516
	IMMT	5120.27	2883.44	0.597408	-0.743211	0.00108793	0.0085866
	DDX5	16959.7	10887.8	0.636766	-0.651164	0.00109582	0.00864347
	SLC39A8	1616.53	946.02	0.598108	-0.741523	0.00109738	0.00865027
	UGT8	553.716	277.347	0.536707	-0.897793	0.00110415	0.00869818
	DPH3	1244.51	2270.58	1.79107	0.840823	0.00110807	0.00871816
	UTP6	2928.7	1654.42	0.58928	-0.762975	0.00110774	0.00871816
	PITPNA-AS1	407.816	739.337	1.76134	0.816674	0.00110903	0.00872026
	ZNF485	117.729	266.31	2.05934	1.04218	0.00111396	0.00875356
	BRI3BP	3387.8	2068.8	0.629726	-0.667205	0.00111516	0.00875749
	GAREM	443.368	800.018	1.73199	0.792433	0.00112282	0.00881212
	OSBPL11	1088.72	620.235	0.587662	-0.766941	0.00112551	0.00882776
	ACTR3	11377.6	6906.89	0.624115	-0.680116	0.00112685	0.00883273
	MSX1	7790.75	12506.5	1.55984	0.641397	0.00113112	0.00886065
	HIP1	1281.45	707.833	0.587465	-0.767425	0.00113275	0.00886795
	CDC23	2240.52	1253.66	0.585608	-0.771993	0.00113565	0.00888512
	ZNF600	164.378	346.286	1.93051	0.948985	0.00113743	0.00889351
	SLC1A4	113.979	28.7328	0.386549	-1.37128	0.0011392	0.00890175
	ARL5A	1464.41	2423.88	1.68788	0.755215	0.00114887	0.00897176
	DAP	7182.28	11770.2	1.60627	0.683717	0.00115129	0.00898507
	FKBP1AP1	370.704	721.952	1.83622	0.876739	0.00115267	0.00899028
	TRAP1	30897.8	19077.9	0.634153	-0.657098	0.00115412	0.00899595
	CTNNAL1	8367.61	5256.05	0.643173	-0.63672	0.00115589	0.00900418
	BRD1	1631.33	971.476	0.614816	-0.701774	0.00115734	0.00900991
	CAV2	9375.4	15470.3	1.63994	0.713641	0.00116192	0.00903433
	TEAD4	4496.85	2795.01	0.636411	-0.651969	0.00116162	0.00903433
	C11orf84	9128.78	5469.1	0.603886	-0.727651	0.00117162	0.00910416
	NUDT21	11706.3	7343.1	0.641462	-0.640563	0.00117574	0.00913052
	ATL3	2742.08	1649.11	0.614925	-0.701519	0.00119145	0.00924112
	KRT8	51610	29223.2	0.586487	-0.76983	0.00119089	0.00924112
	LINC00659	64.9879	179.257	2.33267	1.22198	0.00119684	0.00927288
	MID1IP1	5889.47	9392.43	1.54907	0.631401	0.00119702	0.00927288
	CYP51A1	3006.64	1787.37	0.61388	-0.703971	0.00119964	0.00928741
	SLC30A3	957.357	540.952	0.580338	-0.785034	0.00120117	0.00929356
	CDKN1B	2685.23	1649.78	0.630083	-0.666386	0.00120209	0.00929497
	FLJ32255	19.8978	82.3118	2.61518	1.38691	0.00120404	0.00930425
	XRCC6	35716.7	20676.3	0.602877	-0.730065	0.00121031	0.00934702
	SZRD1	12367.7	20259.6	1.62918	0.704143	0.00121525	0.00937937
	PNKP	1633.61	972.629	0.612547	-0.707108	0.00121719	0.0093886
	MR1	322.466	600.785	1.77539	0.828136	0.0012194	0.00939986
	VPS13D	1033.91	1725.72	1.61967	0.6957	0.00123032	0.0094782
	ZNF316	1723.26	1029.99	0.617642	-0.695158	0.00123731	0.00952625
	RNF185	1412.91	2311.99	1.59449	0.673095	0.00124705	0.0095953
	PPP1R18	3050.23	1852.65	0.617003	-0.696651	0.00125483	0.00964929
	CENPT	1614.56	949.017	0.604921	-0.725183	0.00126208	0.00969321
	LAMP2	1775.46	1030.55	0.597258	-0.743574	0.00126177	0.00969321
	GNL1	13690.8	8759.06	0.648541	-0.624731	0.00126506	0.00971011
	NUPL1	5163.55	3234.86	0.639947	-0.643975	0.00127474	0.00977844
	MVB12B	827.457	1426.13	1.65868	0.730033	0.00127867	0.00980265
	PPARA	311.66	590.064	1.79735	0.845869	0.00128039	0.00980985
	EHBP1L1	6628.75	4189.32	0.645394	-0.631749	0.00128284	0.00981662
	RABL2B	1166.37	1921.14	1.60615	0.68361	0.00128281	0.00981662
	MRAS	663.817	1157.62	1.66232	0.7332	0.00128534	0.00982428
	NUP188	7219.75	4534.01	0.64078	-0.642099	0.00128619	0.00982428
	PTCD3	3307.53	2002.66	0.611411	-0.709785	0.00128554	0.00982428
	GNPTAB	1928.67	3120.16	1.57833	0.658396	0.00129013	0.00984843
	INPP1	1387.2	2267.59	1.5966	0.675005	0.00129316	0.00986551
	NUP155	1861.31	1106.59	0.609131	-0.715176	0.00129814	0.00989754
	EEPD1	545.067	279.985	0.552444	-0.856101	0.0013001	0.00990645
	IL17RD	281.581	541.35	1.79895	0.847156	0.00130252	0.00991886
	CPEB4	437.131	782.991	1.71169	0.775422	0.00131005	0.00997022
	FANCL	759.106	408.762	0.572683	-0.804191	0.00131744	0.0100204
	DHRS7	3229.88	5133.82	1.55378	0.635783	0.00132895	0.0101018
	ABCD3	2709.24	1556.46	0.589454	-0.762549	0.00133952	0.010176
	SZT2	541.009	989.255	1.74668	0.804616	0.00134249	0.0101903
	UPF1	4179.47	2615.91	0.641105	-0.641368	0.00134302	0.0101903
	SLC27A2	751.951	412.036	0.569191	-0.813015	0.0013446	0.010196
	COA4	4659.83	7552.47	1.64141	0.714939	0.00134989	0.01023
	TMEM214	6528.91	3941.99	0.634112	-0.657189	0.00135679	0.0102761
	ITGA7	226.251	93.4395	0.475959	-1.07109	0.0013608	0.0103002
	NUDT18	867.762	1451.5	1.62759	0.702738	0.00136701	0.0103349
	USP39	8668.06	5306.77	0.633818	-0.65786	0.00136644	0.0103349
	GPR15	31.4267	106.293	2.45164	1.29375	0.00136905	0.010344
	LOC441242	28.1043	101.863	2.49279	1.31776	0.00137193	0.0103596
	RRN3	4659.72	2824.01	0.623949	-0.6805	0.00137505	0.0103768
	LRP11	1332.86	763.928	0.597834	-0.742184	0.00138331	0.010433
	FAM167A	120.867	270.422	1.99809	0.998625	0.0013929	0.010499
	ZDHHC13	1599.12	946.83	0.615243	-0.700772	0.00139443	0.0105042
	C21orf119	293.459	555.531	1.82837	0.870557	0.00139694	0.0105116
	PLA2G12A	1614.55	2695.32	1.69297	0.759555	0.00139708	0.0105116
	DDX55	3273.1	2036.23	0.637385	-0.649764	0.00139901	0.0105198
	KIAA1462	577.601	1056.8	1.75579	0.812118	0.00140197	0.0105357
	AP1M1	3032.98	1869.74	0.628016	-0.671127	0.00140289	0.0105364
	B3GALTL	419.71	213.062	0.542818	-0.881459	0.00141009	0.0105841
	GNB2	19755.2	12674.8	0.654536	-0.611456	0.00141597	0.0106156
	PRKCDBP	664.994	338.377	0.553289	-0.853895	0.00141518	0.0106156
	SIK2	751.981	411.919	0.573282	-0.802682	0.00142076	0.0106451
	C11orf83	4321.47	2670.25	0.636174	-0.652506	0.00142745	0.0106889
	ANKLE2	5105.56	3225.48	0.645469	-0.63158	0.00143477	0.0107309
	PTPLAD1	8722.06	5478	0.63601	-0.652878	0.0014345	0.0107309
	PLEKHF1	396.022	715.22	1.72077	0.783053	0.00143627	0.0107357
	ABCE1	3889.4	2313.38	0.609906	-0.713341	0.0014413	0.0107541
	NCBP1	3973.32	2353.64	0.61883	-0.692386	0.00144034	0.0107541
	SRSF6	15324.4	8891.94	0.606016	-0.722572	0.0014409	0.0107541
	CBX3	22896.4	14715.4	0.655661	-0.608978	0.00145182	0.0108262
	NUP210	3121.55	1945.12	0.638035	-0.648292	0.00145347	0.010832
	DZIP1L	314.392	148.564	0.515526	-0.955884	0.00145682	0.0108377
	RHNO1	2090.66	1167.21	0.582517	-0.779627	0.00145653	0.0108377
	SH3RF1	4144.66	6530.56	1.54381	0.626498	0.00145524	0.0108377
	UQCRHL	2655.2	4334.07	1.66643	0.736763	0.00146273	0.0108752
	ADCY7	1500.99	2437.96	1.58129	0.661104	0.00146829	0.0109102
	FABP6	363.882	659.535	1.74371	0.80216	0.00147553	0.010951
	TEAD2	1458.64	2438.67	1.61605	0.692475	0.00147498	0.010951
	RBMX2	2878.66	1768.4	0.634646	-0.655976	0.00148457	0.0110116
	HDDC3	1234.22	2039.47	1.62683	0.702062	0.00149463	0.0110797
	BRPF1	2376.47	1467.92	0.632275	-0.661375	0.00149888	0.0111047
	ANKIB1	690.836	1182.95	1.68185	0.750049	0.00150198	0.0111116
	ANXA4	1757.69	2927.28	1.60387	0.681559	0.00150159	0.0111116
	ATRIP	1452.03	865.05	0.609282	-0.714818	0.00150248	0.0111116
	GRAMD3	355.344	656.665	1.75144	0.808538	0.00150777	0.0111442
	SESTD1	412.774	209.39	0.543123	-0.88065	0.00151242	0.011172
	COL27A1	135.199	298.144	1.99177	0.994048	0.00151567	0.0111894
	DHX16	5130.93	3085.35	0.618687	-0.692718	0.00151822	0.0112017
	TMEM159	945.853	1609.2	1.64054	0.714172	0.00151981	0.0112068
	EIF2S1	14769.5	8848.65	0.613045	-0.705936	0.00152302	0.0112239
	TMED8	88.9042	211.9	2.08417	1.05947	0.00152611	0.0112401
	PCMT1	7764.87	4942.04	0.650057	-0.621363	0.00152762	0.0112446
	CUEDC1	2205.97	3584.41	1.58001	0.659933	0.00152878	0.0112465
	PI4KA	1493.46	872.759	0.605816	-0.723048	0.00153062	0.0112535
	ABCB9	751.897	1270.11	1.63149	0.706189	0.00153786	0.0112907
	LIME1	546.579	282.863	0.555916	-0.847061	0.00153913	0.0112907
	PDS5B	763.905	430.878	0.586915	-0.768777	0.00153792	0.0112907
	STX17	882.913	1470.43	1.61589	0.692331	0.00154017	0.0112907
	UBAC2-AS1	59.9243	172.298	2.38315	1.25287	0.00154005	0.0112907
	SLC18B1	1388.84	2252.37	1.58168	0.66146	0.00155061	0.0113606
	PRMT2	4619.25	7494.52	1.58241	0.662125	0.00155726	0.011396
	RNF125	496.696	869.247	1.68255	0.750651	0.00155671	0.011396
	TBC1D17	873.229	1500.82	1.6492	0.721767	0.0015599	0.0114087
	HOMER1	836.898	1455.98	1.707	0.771466	0.00156712	0.0114521
	SERPINB9	1841.29	1058.19	0.608905	-0.715712	0.00156766	0.0114521
	RSAD1	5365.75	8417.73	1.53289	0.616258	0.00156907	0.0114558
	ATP1A3	1496.11	888.705	0.61525	-0.700756	0.00157168	0.0114615
	GPBP1L1	4870.67	7777.84	1.56002	0.641569	0.0015715	0.0114615
	KRT18	40196	25485.9	0.645688	-0.63109	0.00158625	0.011561
	TIMM10B	1736.35	2869.01	1.62102	0.696904	0.00159532	0.0116204
	LPAR5	211.744	415.611	1.83561	0.876262	0.00160243	0.0116654
	CASP3	1127.34	657.583	0.603746	-0.727987	0.00160458	0.0116743
	ZDBF2	128.491	284.109	1.99201	0.994221	0.00160964	0.0117044
	LOC100129361	1137.53	1900.84	1.67918	0.747753	0.00161846	0.0117617
	SMARCC2	3132.93	1946.34	0.637842	-0.648728	0.00162185	0.0117738
	SMIM20	2226.13	3568.66	1.58184	0.661602	0.001622	0.0117738
	EDEM2	2879.92	4602.23	1.55281	0.634881	0.00163183	0.0118383
	TGIF1	5620.08	8839.55	1.5365	0.619649	0.00163317	0.0118412
	ZNF587	321.3	626.523	1.82571	0.86846	0.00163533	0.01185
	ATP8B2	1587.48	2596.79	1.585	0.664484	0.00163855	0.0118665
	ZNF195	1204.99	1963.6	1.59198	0.670821	0.00164598	0.0119134
	LAMC3	320.125	591.174	1.75089	0.808089	0.00165516	0.011973
	BLOC1S6	2344.82	3901.81	1.63028	0.705117	0.00166635	0.0120332
	SLC37A1	657.755	1115.76	1.63968	0.713415	0.00166507	0.0120332
	UBA2	7432.25	4584.92	0.639641	-0.644666	0.0016658	0.0120332
	ZNF480	719.675	1204.25	1.64501	0.718101	0.00167055	0.0120566
	TNPO3	5768.36	3610.33	0.637116	-0.650372	0.00167309	0.0120679
	FUBP1	5193.71	3226.45	0.620944	-0.687465	0.00167939	0.0121064
	DFNB31	311.22	572.32	1.75032	0.807615	0.00168906	0.0121692
	RSPH3	480.76	839.518	1.67718	0.746041	0.00169053	0.0121728
	TBC1D14	6520.47	10596.5	1.57493	0.655283	0.00169729	0.0122144
	LATS2	641.784	1089.12	1.64339	0.716671	0.00170379	0.0122542
	KIAA1656	49.1751	140.588	2.2773	1.18733	0.00170651	0.0122667
	ETV7	80.6829	200.113	2.10744	1.07549	0.00171076	0.0122832
	SH2D5	1064.43	1756.89	1.60498	0.682554	0.00171068	0.0122832
	CENPBD1P1	2186.22	3665.81	1.63141	0.706118	0.00171354	0.0122962
	LRRC47	5106.55	3188.15	0.633546	-0.658478	0.00171682	0.0123127
	LAMP1	14042.4	8651.88	0.634489	-0.656332	0.00172161	0.01234
	HSF2	796.23	412.782	0.556218	-0.846276	0.00173383	0.0124205
	ADD1	5256.51	3051.41	0.605758	-0.723187	0.00174148	0.0124682
	KATNA1	1511.06	909.383	0.622065	-0.684863	0.00174254	0.0124687
	ANP32A	18362.9	11537.3	0.653187	-0.614432	0.00174968	0.0125127
	MGC57346	859.408	1435.72	1.62223	0.697974	0.00175195	0.0125218
	TADA1	1292.31	762.281	0.612237	-0.707839	0.00175736	0.0125533
	THOC1	618.775	340.834	0.572227	-0.80534	0.00175868	0.0125555
	CACNA2D2	366.708	183.547	0.538042	-0.894211	0.00176014	0.0125589
	LOC100130075	36.2148	126.544	2.47949	1.31004	0.00176724	0.0125952
	PAICS	23743.9	14712.6	0.641605	-0.640243	0.00176722	0.0125952
	AP2A2	3933.38	2441.5	0.633437	-0.658727	0.00176966	0.0126053
	PSD4	537.178	931.087	1.66541	0.735875	0.00177334	0.0126244
	CLUH	7003.29	4499.38	0.648875	-0.623987	0.00177561	0.0126333
	ARID1A	3618.29	2277.59	0.643254	-0.636539	0.00178032	0.0126548
	KIF4B	119.175	35.0184	0.406155	-1.2999	0.00178064	0.0126548
	HNRNPC	28041.5	16946.4	0.631349	-0.66349	0.00179334	0.0127379
	GATA6	356.741	169.765	0.524463	-0.931088	0.00180125	0.0127868
	CCT4	20397.9	12197.5	0.608484	-0.716708	0.00180592	0.0128055
	RPL23AP7	196.292	400.553	1.86709	0.900794	0.00180505	0.0128055
	GALNT14	1694.81	998.739	0.612574	-0.707043	0.00181661	0.0128741
	GPD1	119.5	264.177	1.99218	0.994349	0.00182099	0.0128978
	DHX37	4945.18	3096.02	0.640463	-0.642813	0.00182878	0.0129457
	CALML4	737.636	417.775	0.58974	-0.761848	0.00183554	0.0129716
	CCNYL2	97.4869	224.378	2.03003	1.0215	0.00183543	0.0129716
	LLGL2	5322.43	3384.85	0.649942	-0.621618	0.00183485	0.0129716
	TOE1	1711.67	997.493	0.596032	-0.746537	0.00183729	0.0129767
	ADRM1	19908.8	12939.2	0.658938	-0.601785	0.00184104	0.0129959
	NUP98	4818.26	3070.16	0.651476	-0.618216	0.00184671	0.0130286
	FBXO21	1916.33	1059.68	0.57885	-0.788738	0.00186372	0.0131412
	PABPC1	29145.9	45275.9	1.50888	0.593475	0.00187182	0.0131909
	TCEA1	3002.37	1840.31	0.638114	-0.648115	0.001876	0.0132129
	SHFM1	4957.69	8060.33	1.65479	0.726645	0.00188185	0.0132467
	BCL2L2	2779.62	4568.42	1.60491	0.682488	0.00188346	0.0132506
	MAP4	11962.8	7721.92	0.659273	-0.601052	0.00188804	0.0132606
	RAE1	6253.38	3647.47	0.602042	-0.732064	0.00188749	0.0132606
	RUVBL2	27168.8	16442.3	0.627307	-0.672756	0.00188739	0.0132606
	SLC35D1	665.337	1124.24	1.62965	0.704565	0.00189003	0.0132671
	ACHE	69.8868	175.452	2.13171	1.09201	0.00190508	0.0133653
	UBN1	4493.89	2863.41	0.651409	-0.618364	0.0019069	0.0133707
	CTDP1	2395.99	1450.75	0.614383	-0.702789	0.00190837	0.0133735
	CYB561D1	579.159	1011.96	1.6807	0.74906	0.00191219	0.0133808
	LINC00839	943.798	1539.8	1.59845	0.676671	0.0019126	0.0133808
	STRIP2	302.31	142.139	0.514906	-0.957619	0.00191158	0.0133808
	ASB1	2179.44	3466.9	1.55289	0.634953	0.00191657	0.013401
	EEF1A2	28583.4	17305	0.624758	-0.67863	0.00192085	0.0134161
	PARPBP	1189.46	710.363	0.61668	-0.697407	0.00192002	0.0134161
	POU2F1	1304.7	786.241	0.620936	-0.687484	0.00192741	0.0134544
	SH3TC1	116.278	259.423	1.97741	0.983611	0.00193445	0.0134961
	U2SURP	3952.84	2435.43	0.625997	-0.675771	0.00193717	0.0135075
	LAMTOR5	5578.06	9137.25	1.66649	0.736815	0.00194095	0.0135264
	AGBL5	2102.38	3470.64	1.6138	0.690461	0.00194587	0.0135467
	RNMTL1	4143.08	2578.27	0.628392	-0.670263	0.00194602	0.0135467
	FAM83F	1661.45	2714.32	1.59367	0.672357	0.00195629	0.0136106
	DAG1	7799.32	4562.1	0.615068	-0.701183	0.00195939	0.0136246
	PPIF	15003.8	9734.54	0.661843	-0.595438	0.00196178	0.0136337
	LPXN	50.7219	140.814	2.23915	1.16295	0.00196468	0.0136463
	LOC642852	757.346	1299.13	1.65638	0.72803	0.00196743	0.0136579
	KHDRBS3	696.011	389.769	0.588671	-0.764467	0.00196981	0.0136669
	GAPDH	254704	162251	0.646777	-0.628659	0.00199335	0.0138225
	DCP1B	896.727	1494.9	1.63424	0.70862	0.00202346	0.0140158
	PABPC3	1477.62	2420.44	1.56456	0.645759	0.00202254	0.0140158
	MANEAL	3590.6	2243.42	0.643041	-0.637017	0.00202997	0.0140532
	PAX8-AS1	1901.72	3073.62	1.57136	0.652017	0.00203381	0.014072
	SNHG12	1254.18	1999.57	1.5737	0.654164	0.00203765	0.0140909
	NCR3LG1	17.1139	77.2258	2.57717	1.36579	0.00205156	0.0141792
	ACLY	7830.69	4901.03	0.640876	-0.641882	0.00206738	0.0142807
	MSANTD2	283.047	133.974	0.520441	-0.942194	0.00206938	0.0142859
	SH3TC2	300.972	550.006	1.73901	0.798264	0.0020704	0.0142859
	MED25	3548.37	2152.31	0.633154	-0.659371	0.00207317	0.0142972
	NCKAP5L	575.215	986.502	1.6482	0.720889	0.00207912	0.0143303
	COX6C	9938.71	15979	1.59822	0.676462	0.00208726	0.0143785
	FBXL19-AS1	80.2599	209.158	2.1503	1.10454	0.00209748	0.014441
	NXF1	3729.82	2283.92	0.62409	-0.680175	0.0021052	0.0144862
	TECR	4548.04	2802.06	0.631873	-0.662293	0.00211137	0.0145128
	TTC39A	737.548	1232.27	1.61131	0.688231	0.00211033	0.0145128
	GTF3C5	9903.33	6290.83	0.653216	-0.614367	0.00211602	0.014536
	KIAA1328	156.037	341.621	1.90334	0.928535	0.00211707	0.014536
	ARL15	259.91	488.204	1.76945	0.823298	0.00212149	0.0145584
	PPFIBP1	1385.05	2289.47	1.59718	0.675528	0.00212309	0.0145615
	LOC100131691	146.566	322.991	1.98604	0.989896	0.00212703	0.0145805
	CSNK1G1	1575.33	2507.65	1.55313	0.635176	0.00213272	0.0146036
	NFATC2IP	2927.37	1781.46	0.635642	-0.653713	0.00213218	0.0146036
	DARS	5177.65	3064.26	0.611922	-0.70858	0.00213467	0.014609
	PGD	8182.82	4859.99	0.618019	-0.694277	0.00214049	0.0146408
	CNN2	12495.3	8116.2	0.661075	-0.597114	0.0021494	0.0146778
	PPP6R1	13710	8932.89	0.663265	-0.592343	0.00214727	0.0146778
	RND3	827.737	1366.42	1.59832	0.676555	0.0021488	0.0146778
	DHX15	7114.49	4449.16	0.631873	-0.662293	0.00215702	0.014718
	GTF3C6	2300.96	3647.13	1.57205	0.652647	0.0021588	0.014718
	ZNF440	430.685	751.926	1.67519	0.744321	0.0021578	0.014718
	S100A4	14901.2	23555.4	1.5374	0.62049	0.00216547	0.0147555
	PRPS1	9800.75	6148.91	0.654855	-0.610753	0.00216848	0.01476
	TRIOBP	12629.1	19543	1.51117	0.595668	0.0021674	0.01476
	ATP2B1	2480.78	1524.09	0.631444	-0.663273	0.00217139	0.0147718
	CREBBP	2953.42	1871.68	0.646491	-0.629298	0.00218148	0.0148253
	CSTF3	2038.14	1264.2	0.638873	-0.646399	0.00218162	0.0148253
	ORC3	1470.92	893.364	0.626391	-0.674865	0.0021828	0.0148253
	ITPRIP	1584.2	969.518	0.625817	-0.676188	0.00218483	0.0148311
	RILPL2	1465.5	2351.37	1.56682	0.647836	0.00219249	0.0148751
	UFSP1	98.6428	230.336	2.0235	1.01685	0.00219664	0.0148952
	CEBPA-AS1	135.231	284.153	1.91633	0.938343	0.0021994	0.0149058
	NRD1	5856.28	3698.41	0.641409	-0.640682	0.0022026	0.0149195
	UTP18	8696.42	5523.2	0.64896	-0.623799	0.00221291	0.0149813
	TRIM11	2553.8	1604.92	0.644237	-0.634337	0.00221792	0.0150071
	LINC00938	108.039	240.113	1.99738	0.998108	0.00222803	0.0150674
	HECW1	46.2757	135.499	2.27988	1.18896	0.00223873	0.0151262
	SYNE2	340.674	170.183	0.540125	-0.888634	0.00223914	0.0151262
	RNF170	463.251	814.46	1.67212	0.741679	0.00224137	0.0151332
	RFK	4252.66	6650.78	1.53611	0.619286	0.00224582	0.015155
	GDI2	14374	8315.74	0.616279	-0.698345	0.0022472	0.0151562
	LSS	1956.14	1143.06	0.609903	-0.713349	0.002251	0.0151737
	SEPT3	886.6	516.141	0.60728	-0.719566	0.00225643	0.015194
	UBQLN1	10568.4	6525.14	0.626215	-0.67527	0.00225557	0.015194
	ST14	22270.9	14547.7	0.666837	-0.584593	0.00227279	0.0152887
	TMEM104	2259.76	1398.62	0.638977	-0.646164	0.00227293	0.0152887
	PPP2R1A	23770.2	14315.8	0.633997	-0.657451	0.00229609	0.0154363
	ABCD4	1134.69	1853.79	1.57638	0.656613	0.00230308	0.015475
	MED13L	4149.35	6411.55	1.51377	0.598142	0.00231086	0.0155126
	TSPAN14	4935.52	7762.37	1.52562	0.609398	0.00231115	0.0155126
	BRPF3	1561.16	944.474	0.627179	-0.67305	0.00231974	0.0155569
	VWA1	5735.49	3687.23	0.657639	-0.604633	0.00232023	0.0155569
	CNTLN	374.46	191.968	0.549648	-0.86342	0.00232443	0.0155768
	ARID5B	164.831	361.855	1.95871	0.969905	0.00232855	0.0155901
	GSTCD	1070.42	639.504	0.618233	-0.693778	0.0023289	0.0155901
	ITPRIPL2	3726.86	5778.23	1.51629	0.600543	0.00233096	0.0155956
	YY1	7320.71	4743.31	0.661253	-0.596727	0.00233388	0.0156068
	LITAF	4020.54	6243.56	1.51572	0.6	0.00233643	0.0156156
	AURKAPS1	279.914	108.201	0.476096	-1.07068	0.00237207	0.0158419
	P4HB	105216	67028	0.659474	-0.600612	0.00237282	0.0158419
	GAA	3362.13	2136.11	0.646255	-0.629825	0.00239225	0.01595
	PAK4	6712.05	4347.45	0.6619	-0.595315	0.00239237	0.01595
	TINCR	164.477	351.044	1.92695	0.946321	0.00239282	0.01595
	SNHG16	2551.19	3973.85	1.52507	0.608876	0.00239887	0.0159818
	SEPT10	3114.58	1910.38	0.634291	-0.656783	0.00240209	0.0159948
	DDX56	10719.9	6829.59	0.650038	-0.621404	0.0024053	0.0160077
	NUS1	1464.1	2365.83	1.57841	0.658473	0.00241082	0.016036
	SMARCA5	4706.81	3010.48	0.651205	-0.618816	0.00241309	0.0160426
	VPS52	3149.48	1921.58	0.636028	-0.652837	0.00241554	0.0160503
	PIGU	1834.59	1066.86	0.608587	-0.716464	0.00241709	0.0160522
	MARS	6275.61	3764.35	0.620826	-0.687739	0.00242048	0.0160662
	ANK1	38.3298	116.168	2.30351	1.20383	0.00242575	0.0160673
	CFLAR	1141.2	1833.24	1.56399	0.645232	0.00242202	0.0160673
	SREK1	2891.79	1827.24	0.645807	-0.630825	0.00242536	0.0160673
	TGFBR1	1242.12	2001	1.58646	0.665815	0.00242348	0.0160673
	ECM1	194.888	74.3444	0.46641	-1.10033	0.0024329	0.0161061
	ADCK3	1106.9	1932.62	1.66212	0.733021	0.00243593	0.0161177
	CBWD1	885.692	1502.07	1.64144	0.714963	0.00244386	0.0161576
	TMEM52	1179.73	1909.46	1.60295	0.680729	0.00244454	0.0161576
	RNF135	870.641	1453.1	1.61196	0.688817	0.00244692	0.0161649
	UNC5B	1351.11	2173.87	1.59815	0.676399	0.00245121	0.0161847
	DGUOK-AS1	125.788	266.527	1.92157	0.942287	0.00245997	0.016234
	WDR54	3392.07	2169.18	0.654016	-0.612603	0.00246196	0.0162353
	YBX1	26039	14930.8	0.605441	-0.723942	0.00246275	0.0162353
	TBC1D15	1237.01	752.489	0.623048	-0.682585	0.00246907	0.0162684
	TRIQK	378.128	669.076	1.70024	0.765736	0.0024841	0.0163588
	TAF6	4845.38	3108.32	0.65768	-0.604543	0.00248623	0.0163643
	TUBGCP4	1809.58	1090.87	0.625585	-0.676722	0.00249118	0.0163883
	CAPRIN1	12776.8	8111.4	0.651556	-0.618038	0.00249849	0.0164278
	SRA1	6536.08	10127.4	1.51858	0.602718	0.0025046	0.0164593
	ABAT	156.364	321.053	1.89398	0.921422	0.00250757	0.0164703
	OAZ2	5653.76	9244.1	1.58342	0.663042	0.00251319	0.0164985
	PDS5A	8337.98	5389.62	0.659311	-0.600968	0.00251809	0.0165221
	C4orf27	1866.06	1164.25	0.638857	-0.646434	0.00252416	0.0165479
	FSCN2	17.0327	70.792	2.5236	1.33548	0.00252466	0.0165479
	OLFML2A	129.415	46.1664	0.449703	-1.15296	0.00253001	0.0165657
	ZNF143	1135.52	673.044	0.599832	-0.737369	0.00252937	0.0165657
	LRRC26	76.989	17.7503	0.39996	-1.32207	0.00254061	0.0166178
	XPO1	8381.83	5461.79	0.663477	-0.591881	0.00254013	0.0166178
	THAP7	2762.6	1706.08	0.641841	-0.639712	0.00254196	0.016618
	HES4	1626.01	865.14	0.586723	-0.769249	0.00254824	0.0166503
	METTL17	2391.44	1496.38	0.644758	-0.63317	0.00256041	0.0167211
	DHX34	3736.74	2405.19	0.656749	-0.606585	0.0025698	0.0167574
	FOSB	168.837	353.272	1.90024	0.926184	0.00256874	0.0167574
	TLX3	268.328	127.296	0.522251	-0.937184	0.00256998	0.0167574
	UHMK1	6147.08	9437.47	1.50551	0.590255	0.00257129	0.0167574
	C9orf41	578.786	972.513	1.62894	0.703938	0.00257437	0.0167688
	HAUS6	1769.28	1102.99	0.640234	-0.643328	0.00257804	0.0167706
	MBD5	270.841	519.162	1.83125	0.872827	0.00257635	0.0167706
	SNX29	291.431	537.574	1.75442	0.810997	0.00257865	0.0167706
	RFX2	1115.56	602.171	0.5832	-0.777938	0.00258819	0.0168239
	GOLM1	11015.8	7215.63	0.667802	-0.582508	0.00258994	0.0168266
	MBTPS1	12214.7	19064.4	1.51124	0.595728	0.00259395	0.0168439
	ICMT	11277.1	7168.48	0.653857	-0.612953	0.00259673	0.0168533
	BCAS4	916.558	1536.22	1.61017	0.687217	0.00260681	0.0169012
	USP13	1471.67	854.23	0.611398	-0.709816	0.00260635	0.0169012
	SLC37A2	117.434	252.03	1.93341	0.951147	0.0026088	0.0169054
	IMPACT	1881.23	3037.45	1.55782	0.639532	0.00261153	0.0169056
	NOTCH2NL	313.438	559.76	1.71509	0.778284	0.00261145	0.0169056
	CNOT10	2213.09	1353.67	0.62004	-0.689566	0.0026152	0.0169187
	SNORD25	229.969	501.374	1.93687	0.953725	0.00261624	0.0169187
	CTSA	5668.69	3663.19	0.656499	-0.607135	0.00261903	0.0169193
	SORBS3	10074.3	6332	0.642431	-0.638386	0.00261774	0.0169193
	NUP50-AS1	52.8221	142.714	2.18301	1.12632	0.00262964	0.0169791
	HSPBP1	7998.14	5215.59	0.662215	-0.594627	0.00264577	0.0170707
	PES1	20175.2	12329.1	0.638519	-0.647199	0.00264653	0.0170707
	WDR53	918.705	542.268	0.611067	-0.710597	0.00266105	0.0171555
	CIPC	1763.75	2766.13	1.53485	0.618098	0.00267196	0.0171977
	CYP4F3	23.2522	85.1177	2.42264	1.27658	0.00267258	0.0171977
	GAK	2935.31	1837.54	0.635803	-0.653349	0.00267172	0.0171977
	NPAS1	72.1345	190.063	2.14504	1.10101	0.00267307	0.0171977
	CXCL1	24.1153	85.2455	2.40791	1.26778	0.0026873	0.0172716
	PRPF6	5714.36	3620.24	0.645344	-0.63186	0.00268637	0.0172716
	DDIT4	5209.23	7983.49	1.50074	0.58567	0.00270905	0.0174025
	SEPT7	6232.5	3854.34	0.639791	-0.644328	0.00271909	0.017458
	DKC1	14681.3	9369.66	0.644921	-0.632807	0.00272597	0.0174932
	ANAPC2	3145.63	1899.48	0.623638	-0.681219	0.00273429	0.0175174
	ATXN2L	7424.68	4851.84	0.665138	-0.588274	0.00273378	0.0175174
	PMS2P5	70.5065	176.08	2.11457	1.08036	0.00273531	0.0175174
	PRMT7	1497.78	924.287	0.635264	-0.654572	0.00273231	0.0175174
	CHKA	2122.83	1330.81	0.643013	-0.63708	0.00273882	0.017531
	CEP89	632.223	358.041	0.590417	-0.760193	0.00274356	0.0175422
	RHOF	5704.71	9050.36	1.54863	0.630994	0.00274476	0.0175422
	SNHG5	857.545	1372.73	1.65687	0.728457	0.0027442	0.0175422
	HOXB6	725.725	1236.63	1.64533	0.718376	0.00274898	0.0175602
	FAM198A	121	42.2771	0.443961	-1.1715	0.00275776	0.0176073
	COBL	819.204	1335.07	1.58085	0.660702	0.00276683	0.0176473
	TPR	3747.4	2328.75	0.647048	-0.628056	0.00276618	0.0176473
	PLCG1	1264.13	768.592	0.627374	-0.672603	0.00277681	0.017702
	ACTL6A	3586.19	2294.38	0.653849	-0.612971	0.00277988	0.0177126
	RBM28	1444.5	865.192	0.609674	-0.713889	0.00278439	0.0177323
	EPM2AIP1	230.097	431.317	1.76543	0.820016	0.00279971	0.0178102
	GAS6-AS2	96.9656	218.967	1.98782	0.991189	0.00280185	0.0178102
	RNF141	7309.19	11372.3	1.51058	0.5951	0.00280108	0.0178102
	TMEM8B	327.389	597.433	1.73167	0.792166	0.00280229	0.0178102
	SNHG1	3894.07	6017.09	1.62244	0.698162	0.00280445	0.0178149
	NPAT	623.802	349.629	0.585971	-0.7711	0.00280779	0.0178271
	PIK3CD	405.23	712.992	1.70335	0.768375	0.00281014	0.017833
	SMYD4	755.451	435.438	0.599401	-0.738406	0.00281526	0.0178565
	ATP6AP1	6769.26	4329.5	0.656142	-0.607921	0.00282245	0.0178931
	LYRM1	1059.84	1854.57	1.66054	0.731649	0.00283198	0.0179445
	JMY	959.806	1552.53	1.56866	0.649531	0.00283638	0.0179633
	C1orf43	11222.4	17940.3	1.56602	0.647106	0.00286842	0.0181518
	EIF3B	35130.3	22266.3	0.646404	-0.629492	0.00286904	0.0181518
	GRHL3	28.2838	94.6014	2.35389	1.23504	0.00287719	0.0181942
	MID2	258.019	474.488	1.73688	0.796496	0.00287959	0.0182002
	ATP6V0A2	662.43	380.561	0.59817	-0.741372	0.00288769	0.0182422
	PHOSPHO1	106.687	235.363	1.96236	0.972589	0.0028892	0.0182426
	FAM161A	346.37	170.145	0.535793	-0.900251	0.00290973	0.0183567
	SYTL4	182.727	77.0341	0.489425	-1.03084	0.00291019	0.0183567
	RGS6	42.7269	127.162	2.2562	1.1739	0.00292004	0.0184096
	APP	11641.7	7216.65	0.634277	-0.656815	0.002923	0.018413
	EML4	2543.88	1534.05	0.624444	-0.679355	0.00292351	0.018413
	GAS6	9342.97	14755.3	1.52306	0.606969	0.00294285	0.0185255
	CCAR1	3423.67	2208.7	0.656773	-0.606534	0.00295038	0.0185636
	ERP29	11610.5	7575.68	0.663671	-0.59146	0.00295991	0.0186142
[truncated: 769 more rows]

## Sheet: MCF7
Polysomal RNA-seq - MCF7 - DESeq2 Results (Nutlin vs. DMSO) - Refseq genes - padj < 0.05
	Gene ID	Base Mean DMSO	Base Mean Nutlin	Fold Change	Fold Change (log2)	p	padj
	KIF20A	1624.46	121.416	0.0874746	-3.51499	3.3426e-61	1.76464e-58
	PBK	958.49	72.6947	0.0914315	-3.45116	5.38671e-45	1.2323e-42
	DMC1	146.938	5.02117	0.104148	-3.2633	1.18606e-14	3.96102e-13
	CDCA3	2503.79	231.308	0.104697	-3.25571	2.82884e-60	1.33892e-57
	FAM64A	1742.3	186.031	0.11571	-3.11142	1.28047e-53	4.1847e-51
	HMMR	603.373	56.4618	0.116108	-3.10645	1.40568e-31	1.4617e-29
	AURKB	3786.43	413.233	0.116152	-3.10591	1.78975e-80	1.75472e-77
	MKI67	5459.38	634.263	0.122747	-3.02624	1.44949e-80	1.53043e-77
	KIF4A	615.524	62.4736	0.124225	-3.00897	1.82962e-30	1.79381e-28
	KIF2C	1653.28	190.023	0.126804	-2.97932	1.48642e-53	4.74478e-51
	DLGAP5	932.729	103.449	0.127855	-2.96743	5.28198e-37	7.88049e-35
	PIF1	263.147	22.3722	0.130272	-2.9404	2.40075e-17	9.83662e-16
	RRM2	4888.43	596.018	0.131273	-2.92936	5.75143e-79	5.26295e-76
	MNS1	271.121	23.6753	0.132034	-2.92102	2.10406e-17	8.67276e-16
	TACC3	7366.66	917.679	0.133438	-2.90576	1.20603e-80	1.37949e-77
	KIF14	568.112	63.0964	0.135952	-2.87883	7.93572e-27	6.2601e-25
	ASPM	511.201	55.9069	0.136432	-2.87375	3.20018e-25	2.24111e-23
	CDC45	2639.33	336.28	0.138846	-2.84844	3.40074e-59	1.55595e-56
	CCNA2	2518.57	335.946	0.141627	-2.81983	1.7566e-55	6.22335e-53
	IQGAP3	624.384	72.3331	0.142132	-2.8147	4.19257e-25	2.90643e-23
	BUB1	1179.26	152.345	0.144396	-2.7919	3.66331e-40	6.20772e-38
	BUB1B	787.667	95.9363	0.147918	-2.75713	1.47739e-25	1.0673e-23
	CDC20	5484.01	760.475	0.14844	-2.75205	1.73668e-71	1.40222e-68
	RAD54L	1806.65	249.81	0.149108	-2.74557	2.12799e-44	4.63631e-42
	NCAPH	1339.28	179.744	0.153341	-2.70518	4.45521e-33	5.18239e-31
	NUF2	596.038	77.1526	0.155833	-2.68192	2.5517e-21	1.4473e-19
	NEK2	581.943	75.8004	0.156117	-2.6793	2.27337e-24	1.5002e-22
	PLK1	7898.74	1161.12	0.157673	-2.66499	5.62941e-66	3.86346e-63
	SPC25	1353.44	198.306	0.159171	-2.65135	4.45304e-34	5.82119e-32
	ESPL1	1079.31	153.829	0.160657	-2.63795	2.18161e-33	2.58145e-31
	SPAG5	2025.69	302.243	0.162273	-2.6235	3.59401e-47	8.96934e-45
	NCAPG	725.262	99.4715	0.163848	-2.60957	2.18239e-25	1.5521e-23
	BIRC5	9238.52	1429.7	0.165896	-2.59165	3.41065e-65	2.22927e-62
	KIF18B	503.339	66.6933	0.167244	-2.57997	1.78233e-18	8.29297e-17
	CDKN3	2463.24	385.643	0.167252	-2.5799	1.42647e-50	3.99587e-48
	BLM	509.811	71.5828	0.169077	-2.56425	3.43856e-21	1.93433e-19
	MAD2L1	2004.46	312.6	0.17243	-2.53592	3.91428e-34	5.1661e-32
	CCNB2	1830.8	297.041	0.174031	-2.52258	4.89163e-42	9.32535e-40
	NDC80	851.23	132.254	0.176333	-2.50363	6.24316e-26	4.58255e-24
	MCM2	4040.75	681.346	0.177679	-2.49266	5.49513e-54	1.83966e-51
	CDK1	2349.01	390.518	0.178116	-2.48911	7.53442e-46	1.78306e-43
	CIT	738.425	115.098	0.178265	-2.4879	1.1107e-24	7.54725e-23
	NUSAP1	2255.65	372.238	0.178624	-2.48501	2.10241e-42	4.12252e-40
	CDCA7	606.775	92.6498	0.179094	-2.48121	1.09352e-20	6.00384e-19
	PRC1	4488.49	765.865	0.180739	-2.46802	1.89122e-53	5.89976e-51
	GTSE1	1170.03	191.496	0.181426	-2.46255	2.61874e-32	2.89878e-30
	KIF11	1180.37	195.858	0.182004	-2.45796	2.67996e-32	2.94281e-30
	NEIL3	95.6833	5.33153	0.182157	-2.45674	4.84647e-08	7.06936e-07
	WDR62	1130	186.673	0.182726	-2.45225	1.69841e-31	1.75281e-29
	UBE2C	7814.33	1390.42	0.185675	-2.42915	4.55759e-64	2.71989e-61
	TCF19	1981.29	344.03	0.185793	-2.42823	5.27105e-41	9.51979e-39
	HMGB2	8700.29	1563.68	0.187683	-2.41363	7.98179e-64	4.56492e-61
	MCM3	4718.96	845.62	0.188285	-2.40901	1.76825e-55	6.22335e-53
	CDCA7L	1095.09	190.257	0.189763	-2.39773	1.29066e-28	1.14294e-26
	POLE2	376.128	57.6353	0.191552	-2.38419	4.7948e-15	1.64123e-13
	POLQ	459.526	74.1357	0.191677	-2.38325	9.51047e-17	3.70854e-15
	GINS2	10375.6	1925.43	0.192852	-2.37443	2.07069e-64	1.29192e-61
	SHCBP1	956.041	167.081	0.193178	-2.372	2.5868e-27	2.17831e-25
	CCNB1	8192.19	1531.9	0.193607	-2.3688	1.1115e-60	5.44876e-58
	BRCA1	1395.84	250.077	0.194362	-2.36318	2.15624e-33	2.57754e-31
	BRIP1	2793.79	517.567	0.196337	-2.34859	2.41272e-43	4.87015e-41
	EME1	583.291	99.1057	0.197206	-2.34223	1.11714e-19	5.74303e-18
	CASC5	236.06	33.4093	0.197604	-2.33932	2.50944e-11	5.73121e-10
	GPR19	76.5949	4.21548	0.198452	-2.33314	3.0577e-07	3.82589e-06
	PTTG1	2885.24	535.32	0.199752	-2.32372	2.85786e-36	4.12916e-34
	PRR11	11235.3	2112.34	0.200718	-2.31676	2.95317e-56	1.09554e-53
	EXO1	750.735	133.366	0.201609	-2.31037	1.24431e-22	7.52395e-21
	TROAP	3818.08	726.286	0.202108	-2.30681	1.70057e-39	2.74613e-37
	KIF15	240.058	35.329	0.202132	-2.30663	1.79845e-11	4.16281e-10
	KIFC1	2222.36	417.65	0.203481	-2.29703	2.69437e-37	4.10922e-35
	KNTC1	430.496	73.6445	0.203584	-2.2963	2.47023e-13	7.01996e-12
	FOXM1	7348.1	1427.79	0.204159	-2.29223	1.42113e-44	3.1462e-42
	RAD51	2464.32	492.956	0.204491	-2.28989	2.5688e-32	2.86661e-30
	TPX2	6527.65	1271.55	0.20514	-2.28532	2.07435e-48	5.37217e-46
	UBE2T	3675.89	719.016	0.205457	-2.28309	2.13346e-46	5.13753e-44
	ANLN	977.004	182.164	0.205895	-2.28002	3.51627e-24	2.28741e-22
	TRIP13	3691.06	721.874	0.207389	-2.26959	1.18624e-45	2.75972e-43
	MND1	463.106	80.9469	0.20754	-2.26854	3.41968e-16	1.30385e-14
	E2F2	911.287	167.63	0.20791	-2.26597	3.77825e-24	2.44624e-22
	TK1	16461.6	3309.39	0.212304	-2.2358	3.51741e-57	1.42e-54
	MCM10	1190.42	241.981	0.212431	-2.23494	7.11584e-22	4.19193e-20
	PTTG3P	255.943	41.462	0.215178	-2.21639	4.1414e-11	9.18333e-10
	CENPF	1243.06	241.903	0.215651	-2.21323	7.73418e-26	5.6169e-24
	FAM72B	153.675	19.1515	0.216366	-2.20846	3.13133e-08	4.72315e-07
	CDC25C	675.729	127.86	0.21704	-2.20397	5.12261e-19	2.47581e-17
	CDCA5	7609.02	1594.81	0.217311	-2.20217	4.82118e-53	1.47057e-50
	CSPG5	210.08	32.7228	0.217632	-2.20004	5.96946e-10	1.15567e-08
	DSCC1	1135.08	231.715	0.219549	-2.18738	2.55737e-25	1.80918e-23
	CENPE	388.258	70.2201	0.219825	-2.18557	6.89618e-14	2.08956e-12
	SKA3	2029.46	427.488	0.222369	-2.16897	2.40679e-34	3.20734e-32
	SKA1	414.044	77.8904	0.223022	-2.16474	4.39149e-14	1.35455e-12
	RAD51AP1	304.04	53.3007	0.223173	-2.16377	8.63053e-12	2.09298e-10
	PKMYT1	6483.5	1351.37	0.223337	-2.16271	7.00225e-45	1.57562e-42
	MELK	1694.06	354.521	0.223976	-2.15858	3.00036e-31	3.05059e-29
	DEPDC1B	660.634	129.973	0.225092	-2.15142	2.43151e-18	1.1125e-16
	ORC1	650.143	130.468	0.226649	-2.14147	4.31055e-18	1.92368e-16
	KIF23	1461.52	309.639	0.226963	-2.13947	6.33201e-29	5.79421e-27
	FANCI	2701.43	579.137	0.227107	-2.13856	5.32074e-34	6.82547e-32
	FAM111B	469.317	93.5109	0.227483	-2.13617	3.00265e-14	9.45285e-13
	MYBL2	25517.2	5662.83	0.228188	-2.13171	5.67882e-36	8.11953e-34
	PRIM1	1405.67	302.496	0.229655	-2.12246	2.61506e-27	2.18868e-25
	MXD3	1131.02	238.362	0.231773	-2.10921	1.38314e-23	8.78934e-22
	MCM6	3925.57	877.793	0.231858	-2.10869	3.72663e-39	5.8795e-37
	FANCA	1952.42	417.749	0.232021	-2.10767	2.57023e-25	1.80918e-23
	DEPDC1	385.408	76.0366	0.232238	-2.10633	1.81148e-12	4.82804e-11
	E2F1	2729.64	604.909	0.23284	-2.10259	7.18832e-37	1.06093e-34
	CENPU	1605.26	352.023	0.233449	-2.09882	2.75807e-29	2.57533e-27
	TICRR	821.782	173.739	0.234372	-2.09313	8.95075e-18	3.86346e-16
	CCM2L	626.812	132.275	0.235486	-2.08629	2.6234e-16	1.00303e-14
	ZWINT	5186.84	1180.48	0.237174	-2.07598	2.46685e-43	4.90724e-41
	CTNNAL1	1445.06	318.931	0.237526	-2.07384	7.89188e-27	6.2601e-25
	CENPK	426.012	86.3997	0.23813	-2.07018	1.2381e-13	3.64683e-12
	KHK	2447.06	555.469	0.239985	-2.05899	6.72382e-34	8.54547e-32
	CEP55	2237.28	516.106	0.241455	-2.05017	6.8893e-27	5.52997e-25
	ASF1B	6096.82	1411.62	0.241999	-2.04693	7.20514e-44	1.5215e-41
	DBF4B	848.072	186.377	0.242282	-2.04524	1.10675e-18	5.22038e-17
	ARHGEF39	586.784	123.893	0.243397	-2.03861	2.39864e-15	8.35627e-14
	PSMC3IP	781.463	174.828	0.245157	-2.02822	2.32746e-18	1.06845e-16
	BRCA2	359.759	71.8932	0.245908	-2.02381	1.76971e-11	4.11016e-10
	ATAD2	1789.76	403.968	0.246058	-2.02293	5.5395e-24	3.55304e-22
	CNTRL	320.784	65.6431	0.247906	-2.01214	6.3447e-11	1.36501e-09
	CDC6	1649.8	389.864	0.247944	-2.01192	7.65171e-27	6.10624e-25
	NCAPG2	2893.52	686.068	0.248062	-2.01123	1.9703e-31	2.01823e-29
	PTTG2	208.203	36.258	0.248623	-2.00797	3.56956e-08	5.30832e-07
	FAM133A	148.795	22.995	0.24881	-2.00688	4.68155e-07	5.67658e-06
	LMNB1	2575.79	610.579	0.248909	-2.00631	3.01755e-33	3.54008e-31
	CENPM	3416.88	753.091	0.249099	-2.00521	1.01168e-22	6.14436e-21
	KCNJ2	12484.3	2567.5	0.251235	-1.99289	5.53048e-26	4.10331e-24
	CDCA8	2983.77	711.067	0.252133	-1.98774	7.38804e-34	9.30351e-32
	TOP2A	3252.23	769.283	0.252145	-1.98768	1.12989e-28	1.01365e-26
	ORC6	785.73	176.813	0.252385	-1.9863	9.70206e-18	4.16158e-16
	SGOL1	975.289	214.925	0.252585	-1.98516	2.77471e-18	1.25695e-16
	E2F8	442.472	97.6114	0.254968	-1.97161	8.5031e-13	2.31116e-11
	POLE	2143.49	525.243	0.25565	-1.96776	3.17788e-27	2.64361e-25
	IL17RB	162.691	29.3109	0.257084	-1.95969	3.36889e-07	4.19233e-06
	RPL36A	422.565	93.4659	0.257776	-1.95581	2.06562e-12	5.41082e-11
	CHEK1	1004.09	237.731	0.257923	-1.95499	1.58481e-17	6.65234e-16
	C11orf82	1023.31	249.559	0.259862	-1.94418	1.48066e-18	6.93638e-17
	TRAIP	1000.19	235.62	0.260184	-1.9424	1.29131e-19	6.61364e-18
	MCM7	14801.6	3687.59	0.260639	-1.93987	3.99521e-35	5.48383e-33
	ARHGAP11A	1759.21	435.164	0.260894	-1.93847	1.85753e-26	1.43855e-24
	MMP16	97.0982	12.519	0.26097	-1.93804	7.86599e-06	7.51871e-05
	CLSPN	882.522	212.306	0.263067	-1.9265	1.62842e-18	7.60263e-17
	HELLS	565.042	132.568	0.263813	-1.92241	3.30281e-14	1.03503e-12
	TTK	605.76	141.871	0.264562	-1.91832	4.00797e-14	1.24465e-12
	WDR76	373.873	82.3546	0.266647	-1.907	1.05e-08	1.69557e-07
	MT1F	211.293	43.5112	0.269816	-1.88995	5.63409e-08	8.12327e-07
	ERCC6L	328.739	74.4973	0.270579	-1.88588	3.59887e-10	7.13845e-09
	PHF19	4123.02	656.973	0.270702	-1.88522	6.91841e-06	6.68748e-05
	CKAP2L	209.329	43.1967	0.271344	-1.8818	6.95454e-08	9.86137e-07
	DUT	4103.56	1078.45	0.271447	-1.88126	5.5306e-27	4.4919e-25
	TMPO-AS1	373.897	87.1396	0.272901	-1.87355	7.6002e-11	1.6224e-09
	KIF4B	67.9787	6.87916	0.273195	-1.87199	4.11321e-05	0.000330937
	KIF18A	276.093	61.9741	0.274698	-1.86408	4.82996e-09	8.21513e-08
	FLT4	194.946	40.4714	0.278291	-1.84534	2.48828e-07	3.17713e-06
	LOC100288637	161.739	31.985	0.279134	-1.84097	1.06381e-06	1.20676e-05
	NPHP3	250.972	55.0312	0.280544	-1.8337	1.10106e-07	1.5023e-06
	MCM8	882.34	228.628	0.281053	-1.83109	3.76039e-17	1.52257e-15
	CDCA2	437.989	108.7	0.281554	-1.82851	2.08368e-11	4.79072e-10
	KIF24	193.775	41.2154	0.281799	-1.82726	2.9363e-07	3.69758e-06
	RECQL4	4473.09	1215.21	0.281847	-1.82702	1.64944e-33	2.00356e-31
	POLA2	2690.17	719.708	0.284053	-1.81577	8.7447e-27	6.81987e-25
	NCAPD3	917.879	238.442	0.285918	-1.80633	1.78128e-16	6.88728e-15
	SPDL1	810.249	214.381	0.286925	-1.80125	5.31339e-16	1.99813e-14
	SGOL2	461.693	117.932	0.287099	-1.80038	8.28297e-11	1.75722e-09
	LINC00669	95.1085	14.9402	0.287217	-1.79978	3.85129e-05	0.000312797
	SEMA3D	185.114	39.674	0.287265	-1.79954	2.48842e-06	2.62335e-05
	AURKA	5893.85	1635.47	0.287606	-1.79783	1.20809e-34	1.62571e-32
	FAM161A	204.977	46.5386	0.288511	-1.7933	4.32914e-07	5.28193e-06
	KIAA1524	616.254	164.343	0.28879	-1.79191	6.22839e-12	1.5314e-10
	CHAF1B	1930.72	533.556	0.289691	-1.78741	5.06014e-24	3.26082e-22
	MTFR2	405.622	103.798	0.290681	-1.78249	3.99934e-09	6.89636e-08
	RFC4	2117.19	589.321	0.290838	-1.78171	2.05242e-23	1.28637e-21
	KIF22	6687.37	1902.31	0.29105	-1.78066	4.98896e-34	6.46024e-32
	ESCO2	205.838	46.8511	0.29173	-1.77729	3.34936e-07	4.17181e-06
	DUSP9	317.118	78.2237	0.291854	-1.77668	1.17828e-08	1.88278e-07
	IGFLR1	375.377	94.5799	0.292052	-1.7757	5.94353e-10	1.15227e-08
	KNSTRN	3041.4	850.187	0.292283	-1.77456	7.23974e-28	6.24986e-26
	H2AFZ	25461.3	6939.41	0.292392	-1.77403	3.74214e-25	2.60734e-23
	RFC2	6669.98	1861.56	0.29254	-1.77329	8.77967e-32	9.26998e-30
	RACGAP1	2528.79	713.664	0.294111	-1.76557	2.40167e-26	1.84164e-24
	MTHFD1	3699.97	1054.71	0.295237	-1.76005	6.53633e-29	5.94157e-27
	PSRC1	4023.97	1143.2	0.29625	-1.75511	6.56026e-27	5.29683e-25
	CENPJ	510.671	134.926	0.296386	-1.75445	1.20956e-11	2.87738e-10
	DOC2A	561.243	148.752	0.296463	-1.75408	8.91452e-12	2.15424e-10
	WDHD1	557.924	144.352	0.297697	-1.74809	1.9626e-11	4.51992e-10
	PEG10	158.803	33.7793	0.297853	-1.74733	4.30156e-06	4.33185e-05
	NRM	1579.3	433.115	0.299038	-1.7416	3.58501e-16	1.3631e-14
	C16orf59	1635.26	459.426	0.299736	-1.73824	1.71522e-20	9.26892e-19
	TIMELESS	6303.93	1843.7	0.301837	-1.72816	5.92849e-31	5.8967e-29
	GINS1	1632.32	475.462	0.304373	-1.71609	3.86584e-19	1.91561e-17
	FEN1	8207.63	2455.96	0.304384	-1.71603	6.12387e-33	7.06355e-31
	USP51	113.755	22.4997	0.305669	-1.70996	3.05224e-05	0.000254372
	AARD	1262.06	365.811	0.305964	-1.70856	2.60982e-18	1.19011e-16
	PLK4	576.861	160.652	0.306578	-1.70567	5.12586e-12	1.27691e-10
	RDM1	238.888	59.8674	0.308327	-1.69746	3.67219e-07	4.5308e-06
	CAMK2N2	1578.92	461.108	0.30876	-1.69544	7.42886e-20	3.8645e-18
	ANP32E	5475.08	1629.42	0.309512	-1.69194	1.16663e-28	1.03981e-26
	MCM5	4580.65	1343.18	0.310023	-1.68955	3.50846e-26	2.6754e-24
	RNASEH2A	8380.75	2553.28	0.310459	-1.68753	2.41913e-32	2.72172e-30
	ARHGAP33	260.076	65.4477	0.310697	-1.68642	2.23423e-07	2.88224e-06
	DPF1	757.805	222.595	0.311295	-1.68364	2.38202e-13	6.79742e-12
	PCDH10	505.545	145.731	0.312789	-1.67674	4.38132e-10	8.59115e-09
	SPSB4	215.979	54.6592	0.313129	-1.67517	9.72716e-07	1.11077e-05
	C17orf53	696.498	192.321	0.313735	-1.67238	5.85666e-11	1.26796e-09
	NASP	4110.05	1254.44	0.314296	-1.6698	6.24518e-25	4.28607e-23
	GALNT16	249.756	66.8866	0.316031	-1.66186	9.27663e-07	1.06375e-05
	FANCD2	1043.7	313.624	0.318489	-1.65069	1.00785e-15	3.62139e-14
	RFC3	2903.87	890.607	0.318768	-1.64942	1.97283e-24	1.31452e-22
	MCM4	4766.33	1474.64	0.3192	-1.64747	2.68373e-28	2.36134e-26
	UNG	5525.18	1707.01	0.319856	-1.64451	6.30471e-29	5.79421e-27
	BARD1	408.782	116.882	0.321198	-1.63846	2.71317e-09	4.81149e-08
	LOXL3	467.57	137.447	0.322688	-1.63179	1.37583e-08	2.17066e-07
	LRRCC1	481.266	139.949	0.323114	-1.62988	3.63516e-10	7.18966e-09
	NKD1	99.8804	19.0878	0.323611	-1.62767	0.000147597	0.0010155
	HAUS8	1750.96	532.197	0.323876	-1.62649	6.53942e-18	2.86773e-16
	SLITRK4	134.19	27.268	0.324294	-1.62462	8.77382e-05	0.000646081
	LHX4	171.439	42.6418	0.324434	-1.624	8.26161e-06	7.85855e-05
	BRINP3	341.219	96.0125	0.324719	-1.62274	2.80457e-08	4.26307e-07
	DHRS13	908.895	273.638	0.324853	-1.62214	2.13155e-13	6.10807e-12
	SMC4	3227.21	1014.2	0.325875	-1.61761	3.01238e-24	1.96895e-22
	CDC7	315.084	85.3411	0.326682	-1.61404	3.05376e-07	3.82444e-06
	TMEM194B	142.608	34.2725	0.329133	-1.60326	3.09105e-05	0.000256672
	CEP152	168.079	41.717	0.330414	-1.59765	1.42994e-05	0.000128451
	SKP2	780.667	240.902	0.331163	-1.59439	6.7498e-13	1.85667e-11
	ZNF534	164.833	41.5833	0.331626	-1.59237	2.16545e-05	0.000186468
	FAM83D	2467.08	776.654	0.333637	-1.58365	8.02291e-18	3.4739e-16
	DNA2	214.917	58.3877	0.333686	-1.58344	3.00536e-06	3.11098e-05
	HJURP	1830.32	590.837	0.333868	-1.58265	4.99395e-19	2.42215e-17
	ZGRF1	134.279	32.3549	0.33391	-1.58247	5.16632e-05	0.000404292
	RCN3	103.747	22.5592	0.333947	-1.58231	0.000143831	0.00099457
	OIP5	668.59	206.692	0.3346	-1.57949	1.64925e-11	3.8434e-10
	PTPRG-AS1	257.578	72.7051	0.335103	-1.57732	7.97891e-07	9.2577e-06
	WNT5B	42.1971	3.71807	0.335674	-1.57487	0.000704297	0.00400795
	MASTL	1174.14	373.672	0.335824	-1.57422	1.24191e-15	4.40478e-14
	YBX1	26937.5	9466.84	0.337896	-1.56535	6.0238e-19	2.90114e-17
	POLD1	2070.31	660.193	0.338631	-1.56221	8.96721e-17	3.51668e-15
	MIS18BP1	682.131	212.155	0.339048	-1.56044	2.65352e-11	6.04018e-10
	RBL1	430.079	130.343	0.339312	-1.55931	9.17661e-09	1.49063e-07
	VRK1	1297.81	418.838	0.339574	-1.5582	4.01276e-16	1.51733e-14
	GPX8	305.87	87.9557	0.339707	-1.55764	2.92087e-07	3.68153e-06
	TMPO	4124.08	1361.96	0.340462	-1.55443	1.37547e-24	9.2665e-23
	TERT	32.7634	1.23936	0.341254	-1.55108	0.000698175	0.00397476
	OVOL2	633.379	192.497	0.343424	-1.54194	7.70721e-10	1.4632e-08
	ITGA2B	104.388	23.924	0.344889	-1.5358	0.000209902	0.00137853
	SNORA6	35.569	1.67303	0.345459	-1.53341	0.000836041	0.0046516
	KCNJ3	1985.27	659.687	0.345661	-1.53257	6.79633e-19	3.26176e-17
	POLR3G	360.067	111.053	0.346067	-1.53088	2.07059e-07	2.68122e-06
	PAICS	7742.6	2610.83	0.347378	-1.52542	8.42313e-27	6.60662e-25
	SLITRK6	702.234	224.742	0.347446	-1.52514	3.49287e-11	7.83385e-10
	TEAD4	1648.85	532.972	0.347541	-1.52474	5.45045e-16	2.04407e-14
	ESAM	149.943	39.3533	0.347863	-1.52341	6.2459e-05	0.000480826
	TIPIN	667.641	217.712	0.349522	-1.51655	3.30672e-10	6.58753e-09
	C5orf34	135.339	34.8953	0.350074	-1.51427	9.20738e-05	0.000674389
	DHTKD1	2809.07	928.32	0.350451	-1.51272	3.66378e-16	1.3892e-14
	POLA1	613.778	199.017	0.350849	-1.51108	2.76187e-10	5.54231e-09
	SMC2	688.522	215.316	0.352045	-1.50617	4.11081e-09	7.06196e-08
	TGFBR3L	276.623	83.3003	0.352257	-1.5053	1.44459e-06	1.59649e-05
	LRRC26	274.105	82.7349	0.352384	-1.50478	1.31307e-06	1.46173e-05
	RHEBL1	139.757	36.1963	0.352941	-1.5025	9.73082e-05	0.000706473
	MAP2K6	88.3261	19.3386	0.353014	-1.5022	0.000464201	0.00279248
	PSIP1	2354.59	802.746	0.353599	-1.49981	4.63954e-19	2.26627e-17
	CALML4	416.38	133.516	0.353676	-1.4995	1.85509e-07	2.42736e-06
	HIST1H4J	190.592	48.3412	0.353817	-1.49893	7.53787e-05	0.000563132
	ZNF711	63.6481	10.2273	0.354051	-1.49797	0.00101998	0.00552934
	SNHG4	68.3984	12.5231	0.354978	-1.4942	0.00101607	0.00551247
	CENPI	183.259	51.681	0.355168	-1.49343	7.21764e-05	0.000543441
	CENPA	1543.48	523.3	0.356191	-1.48928	5.75856e-16	2.14788e-14
	CNIH2	546.794	179.2	0.356265	-1.48898	7.76266e-08	1.09507e-06
	CDC25A	786.657	272.289	0.356359	-1.4886	2.58659e-10	5.21343e-09
	DTL	440.397	144.271	0.358228	-1.48105	3.45909e-08	5.1777e-07
	MDC1	1262.7	436.177	0.358276	-1.48086	5.56371e-14	1.70845e-12
	GEN1	366.628	117.318	0.358527	-1.47985	1.95452e-07	2.54775e-06
	RIBC2	298.253	93.513	0.35861	-1.47951	9.97201e-07	1.13779e-05
	RAD54B	462.264	142.113	0.358771	-1.47886	2.53591e-07	3.22594e-06
	FANCG	3071.4	1044.16	0.358987	-1.478	9.05246e-16	3.26126e-14
	BCL2	126.901	33.2798	0.359857	-1.47451	0.000176174	0.00118247
	ACACB	202.169	60.6856	0.36043	-1.47221	2.88098e-05	0.000241566
	SLC39A8	1295.71	447.458	0.360525	-1.47183	2.08307e-14	6.77539e-13
	MYO19	2642.93	912.817	0.36078	-1.47081	1.66608e-17	6.97215e-16
	ZNF367	734.935	254.876	0.361136	-1.46939	1.63946e-08	2.56886e-07
	KCNIP3	265.973	82.6179	0.36193	-1.46622	2.82709e-06	2.94868e-05
	ZBTB8B	87.4651	20.2017	0.363803	-1.45877	0.000738275	0.00417874
	NRGN	1251.35	436.584	0.365418	-1.45238	4.23731e-14	1.3129e-12
	RPS28	1333.95	442.953	0.365493	-1.45208	5.39535e-11	1.1755e-09
	TNFRSF25	245.935	75.6112	0.366395	-1.44853	9.49614e-06	8.8972e-05
	METTL7B	529.098	178.49	0.366479	-1.4482	5.82318e-09	9.72372e-08
	SNORA76C	88.1943	20.5142	0.366966	-1.44628	0.00073149	0.00414723
	XRCC2	254.574	80.5645	0.367081	-1.44583	6.39678e-06	6.24038e-05
	DONSON	812.348	280.649	0.367521	-1.4441	1.09127e-10	2.29033e-09
	CKS1B	976.448	347.983	0.369567	-1.43609	1.22569e-11	2.90568e-10
	STIL	442.605	148.684	0.369832	-1.43506	5.03399e-08	7.3118e-07
	HPDL	728.948	254.646	0.370056	-1.43419	1.15762e-09	2.14113e-08
	SNORD104	124.361	30.8669	0.370149	-1.43382	0.000486781	0.00290629
	NPTX1	183.922	54.9758	0.370701	-1.43167	5.30926e-05	0.000414533
	RADIL	190.572	57.4566	0.371134	-1.42999	4.97328e-05	0.000390075
	JADE1	928.362	319.233	0.373501	-1.42082	5.69764e-11	1.23919e-09
	SYCE2	98.4013	24.6043	0.374471	-1.41707	0.00070684	0.00401909
	GOLGA8A	111.368	30.0037	0.374659	-1.41635	0.000515574	0.00305956
	CCDC19	140.554	40.0356	0.374781	-1.41588	0.000202835	0.00133787
	TTF2	1702.13	615.71	0.375296	-1.4139	2.91884e-15	1.01172e-13
	PAX5	240.435	76.8548	0.375452	-1.4133	1.26573e-05	0.000114903
	CDT1	9358.31	3387.63	0.375758	-1.41213	7.78982e-23	4.79476e-21
	CHAF1A	2825.84	1034.29	0.376313	-1.40999	1.85247e-18	8.56128e-17
	DUSP2	1297.97	466.98	0.376513	-1.40923	1.13038e-13	3.34387e-12
	CCDC18	199.895	63.1498	0.37814	-1.40301	4.30953e-05	0.000344511
	COCH	278.986	91.912	0.378401	-1.40201	5.01221e-06	4.96733e-05
	DLL1	179.944	56.2214	0.379394	-1.39823	9.33897e-05	0.000682934
	NEIL1	114.417	31.3643	0.380112	-1.3955	0.000522681	0.00309238
	C19orf81	498.564	172.359	0.380743	-1.39311	7.58712e-08	1.07141e-06
	CEP192	407.32	142.878	0.381053	-1.39194	3.45632e-07	4.29723e-06
	GPER1	1023.27	374.813	0.3815	-1.39025	1.89939e-11	4.38169e-10
	KIF20B	357.901	122.592	0.382437	-1.3867	8.79643e-07	1.01377e-05
	SNAR-E	117.995	24.2918	0.38463	-1.37846	0.00189386	0.00936085
	SNHG10	565.969	202.865	0.385006	-1.37705	1.69816e-08	2.64574e-07
	DOK1	1172.64	438.386	0.38507	-1.37681	6.23671e-12	1.5314e-10
	CDKN2C	675.107	244.456	0.385095	-1.37671	4.60373e-09	7.84004e-08
	HNRNPD	11664.3	4402.41	0.385164	-1.37646	1.86732e-23	1.17573e-21
	AKAP5	74.6294	17.5381	0.386055	-1.37312	0.00180687	0.0089924
	AURKAPS1	184.364	59.1213	0.386868	-1.37008	9.55004e-05	0.000695405
	ADCY3	1990	745.138	0.387747	-1.36681	2.21375e-13	6.33041e-12
	GLB1L2	809.682	273.623	0.387873	-1.36635	3.63292e-08	5.39086e-07
	CHRNA5	1315.31	490.657	0.38942	-1.3606	7.29395e-12	1.77512e-10
	LOC642846	70.6083	16.422	0.391576	-1.35264	0.00240339	0.0114307
	FBXO5	563.076	204.897	0.39171	-1.35214	2.21342e-08	3.40599e-07
	PRRT2	228.859	77.2184	0.392271	-1.35008	3.6598e-05	0.000298659
	LOC284454	115.899	32.4145	0.392503	-1.34923	0.000845701	0.00469773
	CTSC	713.461	263.285	0.392833	-1.34801	2.15427e-09	3.86903e-08
	ATAD3B	1108.77	404.196	0.393009	-1.34737	5.79226e-11	1.256e-09
	ADAM11	546.619	195.052	0.393159	-1.34681	3.01675e-07	3.78846e-06
	DSN1	1744.62	653.091	0.39316	-1.34681	6.74333e-14	2.04776e-12
	RPL31P11	835.36	278.404	0.393168	-1.34678	4.8696e-07	5.88381e-06
	ANKRD30BL	39.9213	5.26779	0.393215	-1.34661	0.00377071	0.0167978
	MARC1	590.562	217.646	0.393892	-1.34413	1.69407e-08	2.64236e-07
	CENPH	1325.09	492.395	0.394303	-1.34262	2.34881e-12	6.09447e-11
	HPRT1	4050.05	1556.27	0.394599	-1.34154	4.14505e-17	1.6636e-15
	ADM5	194.307	59.8716	0.394742	-1.34102	0.000205625	0.00135367
	HNRNPA2B1	45175.7	17479.7	0.394747	-1.341	2.8442e-24	1.86792e-22
	TONSL	1781.94	673.959	0.395115	-1.33966	3.01354e-14	9.46543e-13
	HAUS4	2414.51	925.141	0.395236	-1.33921	7.43477e-13	2.03286e-11
	UHRF1	566.413	207.199	0.396523	-1.33452	1.02002e-07	1.40148e-06
	POC1A	1578.55	580.625	0.396997	-1.3328	6.49576e-10	1.24875e-08
	NXPH4	1097.57	412.847	0.397953	-1.32933	3.06357e-10	6.11199e-09
	CACYBP	8583.63	3364.64	0.398062	-1.32894	3.54104e-19	1.76102e-17
	MT1X	367.049	128.791	0.398541	-1.3272	4.35228e-06	4.37331e-05
	PARPBP	742.357	278.461	0.398818	-1.3262	3.63278e-09	6.31985e-08
	VPS9D1-AS1	3236.38	1257.72	0.398858	-1.32605	2.26286e-17	9.2994e-16
	SNORA57	64.3564	14.1303	0.398925	-1.32581	0.00327465	0.0148883
	H2AFX	32209.2	12236.4	0.398944	-1.32574	1.61371e-21	9.3583e-20
	CCDC150	86.6476	23.1779	0.399083	-1.32524	0.00193801	0.00955166
	MAP1A	75.3143	18.4691	0.399711	-1.32297	0.00261194	0.0122527
	INCENP	1431.54	550.985	0.400495	-1.32014	9.2593e-13	2.51172e-11
	FANCE	452.612	168.847	0.401672	-1.31591	2.33626e-06	2.48519e-05
	DNAJC9	3824.74	1505.66	0.4018	-1.31545	1.90362e-17	7.89398e-16
	LRRC4B	62.7205	14.0112	0.401977	-1.31481	0.00395243	0.0174666
	C21orf58	1226.81	457.373	0.402146	-1.31421	9.83645e-11	2.08036e-09
	SOX2	615.792	232.395	0.402396	-1.31331	2.1364e-08	3.29857e-07
	HIST1H4C	122.263	28.2565	0.402854	-1.31167	0.00201217	0.00986042
	RANGRF	221.015	76.3615	0.403374	-1.30981	7.94484e-05	0.000590102
	HTR6	60.5781	13.4501	0.404054	-1.30738	0.00393191	0.0173871
	ANKRD32	227.268	79.6355	0.404866	-1.30449	6.95177e-05	0.00052602
	GSG2	404.914	149.796	0.405386	-1.30263	1.52415e-06	1.67767e-05
	HSD17B6	78.1632	20.5184	0.405405	-1.30257	0.00282613	0.0131407
	CD320	3556.86	1361.77	0.406646	-1.29815	1.59487e-15	5.59876e-14
	NOLC1	6182.83	2460.65	0.406908	-1.29723	1.03266e-18	4.88769e-17
	P2RX5	192.58	62.3482	0.407751	-1.29424	0.000329882	0.0020591
	RPP25	2492.65	993.259	0.407986	-1.29341	6.80858e-15	2.30184e-13
	CENPO	2597.2	1022.46	0.4083	-1.2923	3.08672e-15	1.06453e-13
	ZMYND10	216.972	76.1661	0.408805	-1.29051	0.000105987	0.000760864
	EPHA7	102.443	30.497	0.409267	-1.28888	0.00172258	0.00863242
	RFC5	2900.14	1144.98	0.409697	-1.28737	1.24194e-14	4.11761e-13
	GAS2L3	63.936	15.3101	0.410807	-1.28347	0.00430757	0.0188092
	EXOSC2	5050.45	2038.52	0.411209	-1.28206	3.3546e-18	1.50968e-16
	ATF7IP2	153.719	51.264	0.411263	-1.28187	0.000510374	0.00303527
	FGFR4	917.779	360.865	0.412816	-1.27643	7.07695e-10	1.34914e-08
	BORA	396.12	146.582	0.412934	-1.27602	3.66854e-06	3.74382e-05
	NES	759.678	298.065	0.413417	-1.27433	7.43982e-09	1.22445e-07
	TMEM26	240.743	86.336	0.413698	-1.27335	6.7734e-05	0.000515191
	SPC24	902.913	343.448	0.413808	-1.27297	3.41292e-09	5.95244e-08
	SUV39H1	1522.84	608.86	0.414541	-1.27041	2.38825e-12	6.18511e-11
	CCNE2	546.31	213.801	0.414867	-1.26928	2.01215e-07	2.61295e-06
	LOC728819	78.8048	20.8266	0.415302	-1.26777	0.00385657	0.017104
	STRIP2	76.861	21.1924	0.416373	-1.26405	0.00380603	0.0169121
	TUBA1B	53625.4	21777.8	0.41684	-1.26244	2.48397e-21	1.41473e-19
	ECT2	1517.36	598.461	0.417151	-1.26136	9.51305e-11	2.01506e-09
	STMN1	15718	6442.55	0.417271	-1.26094	9.81397e-19	4.66113e-17
	PARP2	2310.21	937.242	0.417888	-1.25881	2.59562e-14	8.28546e-13
	SNORD4A	36.9172	5.26779	0.418996	-1.25499	0.00688943	0.027928
	DNMT1	4322.45	1790.38	0.419027	-1.25488	2.9638e-14	9.37354e-13
	XRCC3	3234.96	1309.59	0.41908	-1.2547	2.01576e-15	7.05824e-14
	PASK	605.869	238.368	0.419445	-1.25345	8.99986e-08	1.25032e-06
	HPSE	187.478	66.2429	0.419889	-1.25192	0.000779799	0.00438079
	EXOSC5	4340.53	1753.05	0.420593	-1.2495	5.23139e-16	1.97269e-14
	GOLGA2P5	150.428	52.4438	0.420671	-1.24923	0.00113116	0.00603903
	SLFN11	167.329	58.0115	0.42188	-1.2451	0.000514228	0.00305554
	LBR	707.185	281.758	0.421989	-1.24472	2.4745e-08	3.7823e-07
	CYP2J2	223.534	81.8676	0.422514	-1.24293	0.000135649	0.000946099
	ISL2	153.323	52.5629	0.422769	-1.24206	0.000950171	0.00518364
	GINS3	793.02	316.996	0.42304	-1.24113	9.13206e-09	1.48515e-07
	SLC29A1	2372.98	993.328	0.423287	-1.24029	2.90632e-08	4.41284e-07
	KIAA0101	3401.04	1384.64	0.423311	-1.24021	1.52752e-13	4.4421e-12
	HOTAIR	251.523	99.9343	0.42358	-1.23929	0.000441223	0.00266677
	GFI1	128.226	42.6481	0.423708	-1.23886	0.00191127	0.00944351
	LOC100506472	57.066	11.9003	0.423713	-1.23884	0.00705456	0.0284713
	IMPA2	2494.44	1030.73	0.42411	-1.23749	6.10492e-14	1.86213e-12
	C1QL4	199.43	72.7543	0.425647	-1.23227	0.000406546	0.00247898
	SEMA6A	319.923	123.593	0.426075	-1.23082	2.56889e-05	0.000218197
	RBBP7	12354.9	5161.49	0.426688	-1.22875	2.65797e-19	1.35123e-17
	WNT10B	129.53	44.0003	0.427901	-1.22465	0.00149543	0.00766476
	NPFF	46.0413	9.41953	0.428166	-1.22376	0.00822113	0.0322041
	DDX12P	123.41	41.2196	0.428487	-1.22268	0.00191506	0.00945544
	WRAP53	1805.06	757.559	0.428687	-1.222	2.95337e-11	6.6784e-10
	KIF26A	1582.69	667.746	0.42898	-1.22102	1.42942e-11	3.34816e-10
	CCDC109B	787.402	320.44	0.429726	-1.21851	1.70809e-08	2.6582e-07
	RLTPR	751.729	303.614	0.430967	-1.21435	4.10651e-08	6.04379e-07
	NUP85	3858.56	1614.51	0.430992	-1.21427	6.35542e-15	2.15927e-13
	DEK	7181.39	3030.56	0.431539	-1.21244	2.05722e-17	8.50523e-16
	ELOVL6	1384.35	585.871	0.432043	-1.21075	1.05332e-09	1.95906e-08
	NFKBID	75.3802	21.5686	0.43224	-1.21009	0.00548106	0.0229719
	CCDC28B	547.61	223.883	0.43248	-1.2093	9.56882e-07	1.09451e-05
	C1orf112	625.73	255.417	0.433062	-1.20736	1.76039e-07	2.31226e-06
	SDC2	1432.31	603.753	0.433947	-1.20441	1.23239e-10	2.56688e-09
	DHFR	1866.33	771.928	0.43398	-1.2043	6.10334e-11	1.31721e-09
	TELO2	4952.07	2069.95	0.434162	-1.20369	7.27439e-16	2.6769e-14
	PRKAR2B	355.825	141.184	0.434867	-1.20135	1.56049e-05	0.000138906
	TRIM59	578.147	239.389	0.434898	-1.20125	4.73801e-07	5.72986e-06
	UBE2S	2736.89	1167.47	0.435489	-1.19929	1.14258e-13	3.37269e-12
	POLD3	1068.01	451.225	0.435636	-1.19881	3.90024e-09	6.73392e-08
	FAM132B	273.53	105.549	0.436527	-1.19586	9.87513e-05	0.000716038
	C4orf46	330.019	129.105	0.43658	-1.19568	3.23637e-05	0.000266677
	RANBP1	8720.17	3742.14	0.437477	-1.19272	1.13242e-17	4.84224e-16
	LHX2	465.956	189.706	0.437766	-1.19177	4.13744e-06	4.17884e-05
	EMC3-AS1	1567.67	624.253	0.438227	-1.19025	2.74204e-09	4.85642e-08
	BDH1	2760.6	1175.32	0.438404	-1.18967	1.3778e-13	4.02377e-12
	GMNN	1994.73	847.204	0.438464	-1.18947	2.59269e-12	6.68933e-11
	DTYMK	9795.94	4162.68	0.438467	-1.18946	8.84475e-17	3.4786e-15
	DMBX1	121.29	40.0356	0.438558	-1.18916	0.00260995	0.0122476
	GPRC5B	781.333	316.105	0.43858	-1.18909	2.21848e-06	2.37897e-05
	MMS22L	548.584	224.244	0.43953	-1.18597	2.42192e-06	2.56903e-05
	BRI3BP	1854.53	792.524	0.439738	-1.18529	6.0328e-12	1.48932e-10
	LEPREL2	250.684	101.042	0.439908	-1.18473	0.000262427	0.0016896
	HAUS5	1526.03	643.775	0.440809	-1.18177	8.05133e-10	1.52431e-08
	RACGAP1P	176.411	62.9094	0.441011	-1.18111	0.00115954	0.00616415
	MSH2	1040.03	438.578	0.44216	-1.17736	3.68243e-09	6.39811e-08
	PLCH1	205.018	77.7304	0.442174	-1.17731	0.000434295	0.00262605
	ZWILCH	1913.87	822.923	0.442657	-1.17574	1.23288e-11	2.91264e-10
	MIRLET7BHG	189.978	56.5276	0.442852	-1.1751	0.00369184	0.0165009
	SLC25A19	1433.47	615.715	0.443568	-1.17277	1.34962e-10	2.79832e-09
	FANCL	572.51	241.26	0.443693	-1.17237	2.23034e-06	2.38796e-05
	SNRPA1	4582.55	1988.67	0.443818	-1.17196	3.03736e-15	1.05015e-13
	RPRM	622.262	262.619	0.444235	-1.1706	1.09323e-06	1.23809e-05
	KCNK2	203.474	77.2268	0.444329	-1.1703	0.000567523	0.00332356
	RTEL1	351.96	137.411	0.444956	-1.16827	0.000119235	0.000844153
	KCNJ8	78.3184	23.4945	0.445712	-1.16582	0.00835226	0.0326247
	TOPBP1	2178.11	947.671	0.44652	-1.1632	4.06989e-12	1.0269e-10
	KPNA2	9213.15	4091.35	0.448146	-1.15796	1.0335e-15	3.70385e-14
	ESYT3	41.8876	8.73924	0.448662	-1.1563	0.0127752	0.0462915
	RRM1	2260.96	1002.82	0.44977	-1.15274	1.03054e-10	2.16952e-09
	F12	2041.72	902.537	0.450254	-1.15119	2.53814e-09	4.51862e-08
	BTN2A3P	59.0973	16.1796	0.45079	-1.14947	0.0110897	0.0411424
	WHSC1	4743.79	2144.6	0.451487	-1.14724	6.0793e-12	1.49811e-10
	FAM124A	98.9094	34.3917	0.452629	-1.1436	0.00576318	0.0239932
	CENPL	758.641	327.547	0.452885	-1.14278	1.37329e-07	1.84876e-06
	BAG2	344.204	142.609	0.453048	-1.14226	4.45195e-05	0.00035507
	MARC2	118.483	42.2061	0.453482	-1.14088	0.0035696	0.0160276
	APITD1	439.201	183.257	0.453626	-1.14043	4.09944e-05	0.000330023
	DDX11	622.749	266.752	0.453755	-1.14001	8.30944e-07	9.6087e-06
	LIME1	269.884	109.837	0.454355	-1.13811	0.000422411	0.00256549
	ODC1	2674.09	1188.19	0.454434	-1.13786	1.2818e-12	3.44305e-11
	NR5A2	54.9444	14.564	0.454511	-1.13761	0.012536	0.0456174
	FIGNL1	521.123	225.393	0.454779	-1.13676	7.35236e-06	7.07207e-05
	CAD	1564.69	698.739	0.454969	-1.13616	7.25261e-10	1.38071e-08
	RPL21	111.545	35.1994	0.45517	-1.13552	0.0075568	0.030135
	DND1	28.588	3.59476	0.455606	-1.13414	0.0132678	0.0477364
	FAM216A	646.874	279.399	0.45613	-1.13248	7.14576e-07	8.39749e-06
	ITGB3BP	523.441	224.491	0.456212	-1.13222	3.30749e-06	3.4032e-05
	DGKE	421.683	178.127	0.456596	-1.13101	1.82603e-05	0.00015995
	HMGB1	13862.6	6153.2	0.456751	-1.13052	6.28474e-16	2.33147e-14
	NUP188	2778.26	1242.04	0.456901	-1.13005	3.14171e-11	7.06936e-10
	KBTBD11	248.72	101.272	0.457688	-1.12756	0.000299054	0.00189249
	GGH	1685.25	750.649	0.457886	-1.12694	1.98136e-10	4.05307e-09
	TAF5	383.598	156.059	0.458507	-1.12499	7.98319e-05	0.00059231
	KCTD21-AS1	57.9928	16.2412	0.458516	-1.12495	0.0130193	0.0470271
	SMC1A	2545.42	1147.53	0.458961	-1.12356	1.22851e-11	2.90733e-10
	LOC150776	768.073	336.672	0.459059	-1.12325	2.15184e-07	2.78381e-06
	PRSS53	106.973	36.9404	0.459369	-1.12227	0.00589927	0.0244559
	KCNQ1OT1	109.956	38.6134	0.459481	-1.12192	0.00532796	0.0224468
	SGK494	102.09	35.0865	0.459521	-1.1218	0.00825062	0.032292
	PARD6A	515.314	217.31	0.460171	-1.11976	5.05408e-05	0.000395961
	CCHCR1	1243.36	541.338	0.460249	-1.11951	2.7505e-07	3.48922e-06
	JPH1	367.754	156.731	0.461109	-1.11682	8.32053e-05	0.00061435
	VAMP1	148.021	56.7105	0.461211	-1.1165	0.00231998	0.0110878
	ASB3	317.312	104.552	0.461425	-1.11583	0.00275554	0.012843
	TNFAIP8L1	1367.03	613.795	0.461541	-1.11547	2.85686e-09	5.05326e-08
	MRM1	857.73	377.974	0.461676	-1.11505	9.44099e-08	1.30369e-06
	C1orf233	4305.55	1927.49	0.462134	-1.11362	1.74423e-13	5.0297e-12
	UBR7	2946.25	1323.96	0.462215	-1.11337	1.86367e-12	4.92884e-11
	FBL	26852.2	12185.8	0.464552	-1.10609	7.90662e-16	2.88634e-14
	BCL2L12	2717.11	1233.03	0.464768	-1.10542	4.00851e-12	1.01328e-10
	CHN1	572.664	253.074	0.465169	-1.10417	7.69267e-06	7.37873e-05
	S1PR5	263.566	109.954	0.465352	-1.1036	0.00036697	0.0022618
	H1F0	28408.3	13090.8	0.465733	-1.10242	1.65941e-14	5.44905e-13
	CENPN	4079.49	1873.63	0.466374	-1.10044	2.97155e-13	8.35808e-12
	STOX1	193.047	77.3438	0.466553	-1.09989	0.00116858	0.00619782
	MTBP	122.459	46.6149	0.466995	-1.09852	0.00544418	0.0228453
	PTCD3	1249.56	560.349	0.467732	-1.09625	1.23925e-08	1.97103e-07
	RMI2	2558.53	1167.96	0.468188	-1.09484	2.32243e-11	5.32182e-10
	NRTN	193.112	79.091	0.468404	-1.09417	0.0014234	0.00734218
	MB21D1	185.468	75.6196	0.468442	-1.09406	0.00150569	0.00770873
	PRPF3	3438.2	1577.1	0.468959	-1.09247	1.394e-12	3.72982e-11
	MLKL	408.517	175.642	0.469628	-1.09041	4.81001e-05	0.000380401
	DBF4	1046.46	479.854	0.469954	-1.08941	1.69166e-07	2.23052e-06
	ACD	3737.69	1718.58	0.470517	-1.08768	1.19609e-12	3.21912e-11
	DLG4	563.471	271.275	0.47065	-1.08727	9.62165e-05	0.000699877
	LOC81691	306.714	128.667	0.47129	-1.08531	0.000307158	0.00193575
	SLIT2	99.107	35.4544	0.471573	-1.08445	0.00795847	0.0313901
	LTB4R	249.028	105.115	0.471738	-1.08394	0.000479029	0.00286499
	PPP1R26-AS1	166.513	66.6954	0.47178	-1.08382	0.00304573	0.0139913
	HAT1	3172.93	1466.11	0.471824	-1.08368	6.84369e-12	1.67339e-10
	COL9A2	374.847	164.825	0.471993	-1.08316	0.000618794	0.00357925
	PELP1	3878.8	1795.31	0.472359	-1.08204	7.33565e-13	2.00976e-11
	HAUS7	5120.67	2372.87	0.47281	-1.08067	1.30083e-13	3.80709e-12
	PDE3B	334.859	146.014	0.4735	-1.07856	0.000124489	0.000878229
	HIST2H2AC	943.116	432.637	0.473582	-1.07831	1.37385e-07	1.84876e-06
	NCAPH2	4403.98	1990.23	0.473651	-1.0781	5.2265e-11	1.14599e-09
	AADAT	258.861	109.329	0.474207	-1.07641	0.00050993	0.00303488
	PABPC1L	473.313	216.457	0.474213	-1.07639	7.88704e-05	0.000586444
	NPIPB5	1279.68	580.597	0.474393	-1.07584	3.81389e-06	3.88061e-05
	MGC27345	312.171	134.979	0.474455	-1.07566	0.000185637	0.00123932
	MSH6	1518.03	699.053	0.474608	-1.07519	1.92994e-09	3.49017e-08
	DNAAF3	705.31	318.144	0.474776	-1.07468	2.78231e-06	2.90861e-05
	IQCC	499.361	222.871	0.474858	-1.07443	1.27281e-05	0.000115394
	SAMD11	5089.76	2338.61	0.475129	-1.07361	1.10848e-12	2.99509e-11
	EXOSC8	2650.37	1238.99	0.475138	-1.07358	1.0121e-10	2.13396e-09
	TBC1D31	352.488	156.632	0.476517	-1.0694	0.000127252	0.000894346
	SLC16A7	454.07	203.171	0.477144	-1.0675	2.55985e-05	0.000217564
	DNMT3B	557.045	250.894	0.477431	-1.06663	1.07001e-05	9.87022e-05
	GNAZ	888.299	404.792	0.477987	-1.06496	2.99669e-07	3.76672e-06
	SNHG1	967.06	462.609	0.477999	-1.06492	3.7024e-06	3.77557e-05
	PRSS36	135.759	52.7396	0.478736	-1.0627	0.00577113	0.024019
	CHPT1	820.674	386.852	0.479514	-1.06035	2.11127e-06	2.27467e-05
	FARSB	3087.92	1460.61	0.480549	-1.05724	3.69205e-11	8.24832e-10
	HNRNPDL	5765.41	2722.58	0.480823	-1.05642	2.12691e-13	6.10753e-12
	SASS6	137.527	54.91	0.481093	-1.05561	0.00490285	0.0209647
	MUTYH	770.55	351.999	0.481667	-1.05389	1.83216e-05	0.000160384
	KLHL13	119.056	46.1174	0.48181	-1.05346	0.0067787	0.0275361
	QSOX2	1452.49	678.45	0.481943	-1.05307	5.73982e-09	9.60789e-08
	MTMR4	1656.11	776.253	0.481959	-1.05302	4.54597e-08	6.65934e-07
	CHTF18	1432.52	655.476	0.482282	-1.05205	1.02545e-07	1.40753e-06
	RHBG	204.49	86.2168	0.482286	-1.05204	0.00193836	0.00955166
	LOC102800310	184.915	77.4692	0.482577	-1.05117	0.00226987	0.0108976
	C20orf27	17436.7	8243.35	0.482588	-1.05114	7.00539e-15	2.36256e-13
	SSRP1	12701.6	6005.93	0.482913	-1.05016	7.40445e-14	2.2337e-12
	CBX5	7975.37	3766.74	0.482935	-1.0501	1.53909e-13	4.4663e-12
	PPAN	1324.33	639.878	0.483023	-1.04984	3.88658e-08	5.73626e-07
	SIVA1	10916.8	5182.84	0.483181	-1.04936	2.20783e-14	7.14731e-13
	CEP57L1	205.064	87.6432	0.483304	-1.049	0.0017311	0.00867193
	FGD1	930.23	439.281	0.483839	-1.0474	4.46727e-07	5.43598e-06
	HOXC11	591.775	273.973	0.484071	-1.04671	7.96408e-05	0.000591212
	PRR3	1017.7	478.377	0.484178	-1.04639	1.7561e-07	2.30884e-06
	NPR2	127.254	50.8941	0.484339	-1.04591	0.0095201	0.0362384
	DCLRE1A	466.551	208.492	0.484421	-1.04567	6.57656e-05	0.000503457
	SNHG3	871.376	419.587	0.484659	-1.04496	3.53593e-06	3.61386e-05
	UGGT2	200.468	85.5961	0.485042	-1.04382	0.00165881	0.00837704
	FKBP5	1869.05	871.165	0.485156	-1.04348	1.98958e-09	3.58856e-08
	HEY2	558.745	260.642	0.485393	-1.04277	2.21752e-05	0.000190474
	GLMN	185.026	79.3231	0.485504	-1.04244	0.00268716	0.0125627
	DARS2	2501.82	1191.12	0.486346	-1.03995	2.22332e-10	4.52778e-09
	NUP107	1236.3	584.798	0.486609	-1.03917	3.50605e-08	5.23656e-07
	PRIMPOL	174.333	74.5694	0.486697	-1.03891	0.00353357	0.0158918
	LYAR	3229.5	1529.73	0.48694	-1.03819	2.37471e-11	5.43255e-10
	RPL14	30740.7	14591.8	0.487114	-1.03767	2.78032e-14	8.81355e-13
	AMH	103.328	37.5569	0.487507	-1.03651	0.0113127	0.0418428
	CCDC15	97.054	34.6445	0.487909	-1.03532	0.0127845	0.0463129
	FKBP7	146.319	58.6939	0.48864	-1.03315	0.00543649	0.02282
	MALAT1	8129.21	3717.38	0.488853	-1.03253	1.84989e-09	3.34981e-08
	FOXD2-AS1	202.148	86.4613	0.48886	-1.03251	0.00206661	0.0100697
	CHAC2	432.396	195.541	0.489111	-1.03176	8.82415e-05	0.00064943
	KATNAL1	293.455	127.923	0.48992	-1.02938	0.000674741	0.00385735
	PKIB	2766.6	1300.14	0.490074	-1.02893	1.95583e-10	4.01282e-09
	EPB41L2	455.925	210.985	0.490779	-1.02685	4.86763e-05	0.000383323
	SLC1A4	276.734	122.962	0.49082	-1.02673	0.000602674	0.00350521
	SUPT16H	3983.38	1929.71	0.490948	-1.02636	1.13317e-11	2.70503e-10
	PCOLCE2	270.327	121.036	0.490974	-1.02628	0.00063677	0.00366163
	C5	202.28	88.1385	0.490984	-1.02625	0.00204019	0.00996411
	CEP85	429.857	198.405	0.49156	-1.02456	0.000135985	0.000947958
	BRICD5	213.285	89.1763	0.491881	-1.02362	0.00201924	0.00989154
	H1FX	24216.2	11646.3	0.491888	-1.0236	2.72104e-14	8.64562e-13
	FBXO17	1369.35	654.87	0.493104	-1.02004	4.10816e-08	6.04379e-07
	RAB27A	965.468	452.658	0.493168	-1.01985	1.19564e-05	0.000109118
	CCDC14	406.04	186.687	0.493303	-1.01945	0.000102216	0.000736881
	MPP2	769.552	381.907	0.494523	-1.01589	2.96606e-05	0.000247943
	YBX2	2915.16	1401.64	0.494761	-1.0152	4.57754e-08	6.69843e-07
	PRIM2	399.039	184.811	0.495046	-1.01436	0.000117204	0.000832681
	CMSS1	3933.57	1921.62	0.495273	-1.01371	2.52046e-11	5.74682e-10
	SAP30	976.142	466.318	0.495435	-1.01323	4.47298e-07	5.4381e-06
	EXOSC9	1333.85	645.519	0.495592	-1.01278	4.86417e-08	7.08764e-07
	HIST1H2BE	99.5275	38.8579	0.495688	-1.0125	0.012659	0.0459553
	MDM1	435.157	202.246	0.497008	-1.00866	8.3526e-05	0.000616386
	FANCC	884.286	412.023	0.497169	-1.00819	4.43798e-06	4.44965e-05
	NUP160	1142.6	550.291	0.497397	-1.00753	1.44705e-07	1.93589e-06
	SMCHD1	523.461	259.983	0.4978	-1.00636	0.000130331	0.000913179
	TEX30	500.906	234.95	0.497913	-1.00603	6.47683e-05	0.000496653
	FAM101B	384.235	179.436	0.498658	-1.00388	0.000171876	0.00115816
	NPM3	7284.18	3615.51	0.498824	-1.0034	2.42741e-10	4.9288e-09
	TEX14	131.827	54.9737	0.499544	-1.00132	0.00768101	0.0304886
	GABBR1	257.18	117.832	0.500217	-0.999374	0.00108972	0.00584965
	GEMIN5	1032.14	490.643	0.500986	-0.997158	7.94752e-07	9.23689e-06
	ZBTB2	1127.25	552.387	0.501393	-0.995987	4.37225e-07	5.3298e-06
	MNX1-AS1	615.876	294.962	0.501819	-0.994762	1.34499e-05	0.000121776
	FFAR2	110.376	43.4413	0.501842	-0.994695	0.012278	0.0448689
	FKTN	1575	752.135	0.502888	-0.991692	1.32451e-07	1.79116e-06
	GSC	560.184	267.915	0.503662	-0.989472	2.61717e-05	0.000221749
	HSPB11	519.771	242.469	0.503807	-0.989056	6.65874e-05	0.000508308
	PCOLCE	525.226	255.58	0.503819	-0.989024	4.63969e-05	0.000368118
	LAS1L	1822.78	890.185	0.505038	-0.985537	3.22006e-08	4.84103e-07
	HSPE1	3444.75	1714.77	0.505132	-0.985269	2.64126e-09	4.69003e-08
	CDC42EP2	1251.36	612.658	0.505265	-0.984889	1.33827e-07	1.80799e-06
	CPNE7	132.291	56.1556	0.506069	-0.982593	0.00936885	0.0357611
	TAF1A	149.699	64.5228	0.506179	-0.982282	0.00665348	0.0270996
	SPATA33	2751.44	1366.01	0.50649	-0.981395	2.51345e-09	4.48047e-08
	NUP35	741.784	367.736	0.50659	-0.98111	3.96099e-05	0.000320003
	CCT5	32620.5	16299.1	0.507384	-0.978851	9.57026e-14	2.85568e-12
	PSMG1	5287.49	2656.09	0.50756	-0.978351	2.54769e-10	5.14258e-09
	TP73	583.054	296.87	0.507698	-0.977958	4.61105e-05	0.000366057
	CEP78	873.326	425.53	0.507788	-0.977703	2.26219e-06	2.41453e-05
	CDC42EP5	140.287	57.0825	0.507911	-0.977353	0.0103421	0.0388815
	THOC6	3265.17	1608.87	0.508213	-0.976494	3.48157e-08	5.20567e-07
	CASP8AP2	447.086	211.425	0.508299	-0.976252	0.000128109	0.000898991
	MATK	2221.42	1104.87	0.51003	-0.971346	4.54776e-09	7.764e-08
	METTL1	2400.1	1233.18	0.510083	-0.971196	1.19897e-08	1.91361e-07
	NUP155	751.061	367.04	0.5104	-0.970301	6.7717e-06	6.56415e-05
	FREM2	476.252	232.19	0.510526	-0.969945	0.000215547	0.00141222
	ASRGL1	1244.81	616.641	0.511129	-0.968242	8.97503e-07	1.03175e-05
	HIRIP3	1290.39	638.951	0.511168	-0.968131	7.32937e-07	8.58386e-06
	FAM117A	577.434	286.12	0.511238	-0.967932	5.32037e-05	0.000415164
	SCLT1	315.439	148.871	0.511447	-0.967344	0.000682664	0.00389292
	CDK5RAP2	1543.19	779.807	0.512394	-0.964676	2.18559e-07	2.82215e-06
	PMS1	295.71	139.76	0.512898	-0.963255	0.000886399	0.00488035
	HSPA9	7477.17	3775.84	0.513061	-0.962798	6.85156e-12	1.67339e-10
	RAD18	900.829	447.771	0.513159	-0.962521	3.11435e-06	3.21894e-05
	MPP3	219.512	101.899	0.513231	-0.962321	0.0028631	0.0132856
	MROH6	354.612	166.65	0.513649	-0.961145	0.000516239	0.00306219
	MIS18A	3268.97	1627.5	0.513865	-0.960538	6.98668e-10	1.33606e-08
	ST8SIA4	329.491	159.516	0.513887	-0.960477	0.000790819	0.00443233
	RPA2	3268.67	1639.43	0.514011	-0.960128	6.23519e-10	1.20372e-08
	AXIN2	155.929	68.9849	0.514114	-0.95984	0.00715096	0.0287842
	CSTF2	2343.64	1185.25	0.515516	-0.955911	4.22904e-09	7.25597e-08
	RPS10	3354.53	1711.96	0.515529	-0.955875	1.32529e-08	2.09573e-07
	AHSA1	18811	9500.59	0.516196	-0.95401	1.9559e-12	5.14305e-11
	LRR1	1262.81	633.129	0.516408	-0.953418	2.89063e-07	3.64677e-06
	TOMM40	18608.5	9313.33	0.516516	-0.953114	1.84009e-12	4.8853e-11
	EZH2	2100.24	1059.59	0.516558	-0.952997	2.24772e-08	3.45103e-07
	HNRNPUL2	4228.81	2146.05	0.517255	-0.951053	1.6205e-10	3.34984e-09
	DDX39A	7581.98	3771.29	0.517421	-0.950591	5.26874e-11	1.15341e-09
	ABCE1	2067.98	1058.43	0.517457	-0.95049	3.7527e-07	4.62384e-06
	ITPKA	1051.68	539.205	0.517959	-0.94909	1.25835e-05	0.000114309
	ATAD3A	3074.2	1518.09	0.518435	-0.947764	4.09136e-09	7.04618e-08
	RPS14P3	8716.61	4419.84	0.518661	-0.947137	1.61934e-11	3.78011e-10
	VAT1L	266.857	129.736	0.519783	-0.944019	0.00256752	0.0120815
	ACOT4	460.569	223.662	0.519864	-0.943793	0.000177402	0.00119014
	XYLB	196.516	93.2622	0.519956	-0.943539	0.00466182	0.0200999
	REEP1	140.09	62.5311	0.520965	-0.940742	0.0114238	0.0421967
	IFRD2	5248.89	2690.05	0.521321	-0.939755	1.58477e-10	3.28093e-09
	SHMT1	2887.85	1465.66	0.521823	-0.938369	4.30288e-09	7.36425e-08
	GAL	977.472	488.242	0.521868	-0.938244	3.33742e-06	3.43142e-05
	ZNF300	136.133	57.5841	0.522149	-0.937468	0.0129179	0.0467468
	NSMCE4A	1714.72	869.157	0.522469	-0.936584	4.03347e-07	4.94316e-06
	CREB3L4	2287.5	1165.97	0.522678	-0.936005	1.48786e-08	2.33933e-07
	ACTL8	187.305	88.913	0.523033	-0.935025	0.00617533	0.025428
	GPR137C	134.213	59.625	0.523201	-0.934564	0.0123241	0.0450255
	CEP72	421.793	207.937	0.523279	-0.934348	0.000277576	0.00177457
	ARL13B	381.828	188.28	0.523523	-0.933676	0.000457456	0.00275396
	MSTO1	377.654	189.815	0.523894	-0.932654	0.000624748	0.00360913
	NUP210	3091.19	1678.76	0.524165	-0.931908	7.29252e-07	8.55531e-06
	TP63	358.274	175.918	0.524667	-0.930526	0.000627383	0.00362127
	TMEM56	225.611	107.424	0.524843	-0.930043	0.00775993	0.0307396
	TUBB	77580.1	39504.5	0.524845	-0.930036	4.2362e-11	9.37839e-10
	SOBP	520.86	254.842	0.524878	-0.929945	0.000152379	0.00104525
	GK5	711.34	358.973	0.525042	-0.929495	1.96866e-05	0.000171024
	MRTO4	11503.2	5903.15	0.52507	-0.929418	1.20953e-11	2.87738e-10
	OXNAD1	866.808	441.261	0.525554	-0.928089	6.33486e-06	6.18878e-05
	IPO4	7495.97	3882.55	0.525805	-0.927399	3.6957e-11	8.24832e-10
	NUDT8	994.373	504.417	0.526687	-0.924982	3.19614e-06	3.29604e-05
	PDSS1	681.672	348.654	0.526762	-0.924778	3.14649e-05	0.000260644
	ARHGAP19	588.77	296.511	0.527008	-0.924103	8.161e-05	0.00060387
	MYBBP1A	2601.7	1344.12	0.527658	-0.922325	8.21182e-09	1.34026e-07
	WDR12	1686.81	867.795	0.527704	-0.922199	1.05439e-07	1.44292e-06
	GCAT	1188.99	599.942	0.527932	-0.921577	1.35845e-06	1.50493e-05
	HSPA8	41355.3	21060.6	0.528098	-0.921124	4.08857e-10	8.05161e-09
	FANCM	155.532	71.5849	0.528354	-0.920422	0.00956636	0.0363935
	ADD3	236.655	114.609	0.528405	-0.920283	0.00315207	0.0144011
	HNRNPA1L2	359.623	174.589	0.528622	-0.919693	0.00112733	0.00602325
	LRRC45	3998.27	2007.89	0.528718	-0.919431	6.6944e-08	9.53026e-07
	PGBD5	446.253	222.415	0.528725	-0.91941	0.000268793	0.00172485
	FIRRE	192.007	92.2986	0.528754	-0.919331	0.00875618	0.0337984
	FAM65C	131.186	59.0022	0.52899	-0.918688	0.0139121	0.0496898
	SPIN4	200.845	95.5005	0.52928	-0.917898	0.00512263	0.0217428
	PSMG4	1059.78	541.284	0.529512	-0.917266	2.69364e-05	0.000227246
	FHL1	1044.25	545.336	0.530082	-0.915713	4.98188e-06	4.94442e-05
	TYRO3	2308.64	1196.41	0.530352	-0.914978	2.5629e-08	3.90871e-07
	CLN6	4639.68	2325.87	0.53038	-0.914902	9.32911e-09	1.51361e-07
	RPL39	1758.48	898.571	0.530837	-0.913658	9.44705e-06	8.86331e-05
	GALNT14	714.104	358.383	0.530941	-0.913376	0.000359421	0.00222226
	GALNT12	212.509	101.895	0.53126	-0.91251	0.00456411	0.01975
	CENPQ	300.042	147.254	0.532289	-0.909718	0.00157855	0.00803074
	LOC101927746	276.534	135.914	0.532442	-0.909304	0.00203769	0.00995705
	KIAA0020	1846.16	965.864	0.532572	-0.908951	1.03247e-07	1.41575e-06
	TRIM45	703.146	376.025	0.532939	-0.907958	0.000160753	0.00109322
	NPHP4	464.961	239.074	0.533178	-0.90731	0.000358975	0.0022205
	VKORC1	6122.11	3214.74	0.533238	-0.907148	1.96901e-10	4.03383e-09
	GTPBP3	1363.52	709.459	0.534061	-0.904923	6.36311e-07	7.54231e-06
	UTP20	399.347	201.874	0.534705	-0.903185	0.000768956	0.00432747
	KCNS3	635.423	310.605	0.535104	-0.90211	0.000131278	0.00091888
	PPARGC1B	204.224	99.2969	0.535683	-0.900549	0.00589566	0.0244483
	SEPT1	217.147	105.188	0.536582	-0.89813	0.00499561	0.0212817
	FAM213B	3879.98	2021.39	0.536599	-0.898083	4.24477e-09	7.27387e-08
	RBM28	1288.82	676.022	0.536711	-0.897782	1.25546e-06	1.40558e-05
	HAUS1	1329.53	698.159	0.536734	-0.89772	1.0418e-06	1.18375e-05
	PRELID2	267.629	130.963	0.536761	-0.897647	0.00281226	0.0130851
	GART	2038.91	1065.85	0.536819	-0.897492	1.1851e-07	1.61537e-06
	RBFA	2672.18	1407.81	0.537038	-0.896903	1.48526e-08	2.33793e-07
	NOD1	263.433	130.583	0.537317	-0.896155	0.00279637	0.01302
	RPL9	1334.75	698.205	0.537358	-0.896045	8.41881e-06	7.97158e-05
	UCK2	4173.42	2203.08	0.537829	-0.894781	4.10144e-09	7.05469e-08
	MYBL1	230.117	112.052	0.538317	-0.893471	0.00524779	0.0221976
	C16orf93	371.203	185.304	0.5387	-0.892447	0.000941222	0.005143
	TIGD3	243.705	119.801	0.538724	-0.892381	0.00372304	0.0166295
	C2CD4C	256.297	127.122	0.538728	-0.892372	0.00330454	0.0150055
	CLCN2	514.912	264.596	0.53877	-0.892259	0.000198165	0.00131022
	BRD8	995.184	525.551	0.538852	-0.892038	1.02789e-05	9.52655e-05
	ICA1L	364.726	181.415	0.539004	-0.891632	0.0011318	0.00604006
	OSBPL6	616.782	319.233	0.539141	-0.891267	0.000154191	0.00105452
	KIAA1731	321.272	162.081	0.539248	-0.890979	0.00174407	0.00873052
	TCF7L1	302.56	152.207	0.539806	-0.889487	0.00184806	0.0091675
	PRPS2	1650.61	872.314	0.540062	-0.888802	3.52996e-07	4.37689e-06
	NCAM2	362.273	181.734	0.540395	-0.887914	0.00104309	0.00563681
	LRP8	1289.9	674.878	0.540561	-0.887472	2.77209e-06	2.90013e-05
	TMEM180	482.02	245.367	0.540938	-0.886464	0.000374673	0.00230307
	POLR1E	1868.52	972.246	0.541006	-0.886283	3.51865e-07	4.36682e-06
	HLTF	586.246	294.666	0.541142	-0.885922	0.000191751	0.00127642
	ARL6IP6	523.991	266.089	0.541156	-0.885884	0.000250775	0.00162365
	EBP	11149.9	5860.31	0.541482	-0.885014	2.30388e-10	4.6849e-09
	KPNB1	11534.4	6046.35	0.541508	-0.884944	1.12241e-09	2.0791e-08
	LOC100289092	441.503	217.24	0.541602	-0.884696	0.00176145	0.00880468
	TAF15	5767.96	3084.65	0.541821	-0.884112	8.86936e-10	1.66556e-08
	CTPS1	2635.31	1393.97	0.541981	-0.883685	4.12375e-08	6.06023e-07
	RPS23	17268.3	9071.29	0.542207	-0.883083	8.07379e-09	1.32087e-07
	RMI1	497.44	255.841	0.542633	-0.881952	0.000299987	0.00189752
	SNHG12	378.094	197.425	0.543669	-0.879199	0.00238211	0.0113413
	SLC30A3	640.73	337.99	0.544136	-0.87796	0.000117193	0.000832681
	SRSF7	11344.5	6094.13	0.544143	-0.877943	1.18887e-10	2.48757e-09
	GRK6	6462.55	3464.59	0.544345	-0.877407	8.86396e-10	1.66556e-08
	JAG2	1297.88	691.144	0.544625	-0.876666	2.6672e-06	2.79679e-05
	PGRMC1	6757.26	3649.46	0.545117	-0.875361	9.38243e-08	1.29691e-06
	TRAP1	20041.1	10609.6	0.545256	-0.874994	3.75724e-08	5.55133e-07
	PARP1	5488.43	2957.82	0.545526	-0.874281	2.8972e-09	5.11801e-08
	GPSM2	2429.68	1295.82	0.545591	-0.874109	1.51954e-07	2.01909e-06
	NFATC2IP	4263.12	2295.57	0.545598	-0.874089	5.556e-09	9.34578e-08
	IVNS1ABP	3738.68	1987.1	0.546546	-0.871585	3.74805e-08	5.54372e-07
	LOC100505666	188.428	91.3571	0.54679	-0.870941	0.00963925	0.0366505
	ARG2	247.149	125.768	0.547145	-0.870004	0.00456251	0.01975
	ORC3	722.894	381.772	0.547153	-0.869984	6.94175e-05	0.000525551
	NFKBIZ	270.191	139.596	0.547312	-0.869563	0.00361388	0.0161946
	MANEA	157.609	75.862	0.547803	-0.868271	0.013831	0.0494771
	G2E3	484.779	253.789	0.548163	-0.867322	0.000456203	0.00274763
	NDC1	1447.4	776.302	0.548491	-0.86646	1.30536e-06	1.45433e-05
	PUS7	1095.29	588.445	0.548699	-0.865914	1.18936e-05	0.000108617
	SNRPB	27444.7	14752.1	0.549165	-0.864689	2.95472e-10	5.90341e-09
	NAT10	2169.55	1168.94	0.549451	-0.863937	1.41363e-07	1.90044e-06
	STK32C	1906.65	1016.85	0.550115	-0.862195	6.90412e-07	8.13635e-06
	BEND3	550.265	291.519	0.550277	-0.86177	0.00023781	0.00154554
	SLCO4A1	1008.86	539.51	0.55034	-0.861606	1.10692e-05	0.000101833
	ELOVL7	779.606	418.258	0.55034	-0.861605	0.000111989	0.000801025
	SH3BP1	2287.13	1228.28	0.550707	-0.860642	7.67637e-06	7.36824e-05
	TMEM194A	611.372	320.855	0.55079	-0.860427	0.000180966	0.00121082
	PPP1R26	2999.43	1679.56	0.550942	-0.860028	1.55813e-07	2.06437e-06
	ODF2	2358.58	1266.92	0.550962	-0.859974	1.59302e-07	2.10653e-06
	MTERFD1	1041.05	562.718	0.551	-0.859876	1.4096e-05	0.00012704
	NOC2L	9964.29	5359.45	0.551114	-0.859577	8.8702e-10	1.66556e-08
	TTC26	267.343	136.901	0.551188	-0.859385	0.00445881	0.0193676
	PHF10	1745.19	940.5	0.55166	-0.85815	6.01592e-07	7.1555e-06
	ALDH9A1	1633.18	882.763	0.551736	-0.85795	8.14009e-07	9.42082e-06
	CGREF1	1676.9	904.596	0.551815	-0.857745	7.00132e-07	8.24186e-06
	HEXIM2	681.404	363.205	0.552072	-0.857072	0.000119351	0.00084444
	MPHOSPH9	598.576	318.72	0.552255	-0.856594	0.000176001	0.00118189
	ANP32B	24924.4	13606.3	0.55319	-0.854152	4.14908e-10	8.1474e-09
	SIGMAR1	1572.38	847.986	0.553973	-0.852112	2.22925e-06	2.38796e-05
	MAT2A	2146.03	1161.27	0.554193	-0.851539	2.41004e-07	3.08584e-06
	FUS	15033.5	8199.72	0.554322	-0.851204	2.7057e-10	5.43755e-09
	PRMT5	4675.37	2558.26	0.554811	-0.849931	6.49643e-09	1.07693e-07
	PDCD11	1934.26	1053.73	0.555117	-0.849135	1.75533e-06	1.91219e-05
	SFI1	659.113	352.348	0.55534	-0.848556	0.000133135	0.000930928
	LINC00052	1452.1	807.555	0.555782	-0.84741	4.47176e-06	4.48025e-05
	MBNL3	713.509	378.971	0.555957	-0.846954	9.91544e-05	0.000718202
	HOXC6	292.594	154.653	0.556317	-0.846021	0.00397233	0.0175319
	BOP1	1852.01	1021.91	0.55634	-0.845962	8.93168e-07	1.02763e-05
	HAUS6	501.568	262.851	0.556552	-0.845411	0.000647243	0.00371718
	DIS3L	661.764	354.704	0.556825	-0.844703	0.000143614	0.000993572
	NCL	18631.4	10250.8	0.556907	-0.844492	2.50132e-10	5.05643e-09
	HADH	2337.87	1276.99	0.557089	-0.844021	1.99841e-07	2.59755e-06
	C12orf65	1246.58	677.743	0.557306	-0.843458	6.80673e-06	6.58447e-05
	RUVBL1	7230.68	3978.42	0.557698	-0.842444	1.94631e-09	3.51513e-08
	KCNK5	245.606	119.186	0.55805	-0.841535	0.0112204	0.0415572
	SRRT	5286.03	2919.92	0.558384	-0.840671	6.19661e-09	1.02847e-07
	METTL16	3186.09	1755.57	0.558743	-0.839743	2.16447e-07	2.7975e-06
	BUD13	1184.7	645.855	0.558745	-0.839737	9.44317e-06	8.86331e-05
	RPS29	15688.9	8634.86	0.558751	-0.839722	2.85358e-07	3.60666e-06
	HSPA2	238.423	121.54	0.559308	-0.838285	0.00706694	0.0284961
	TMEM106C	5537.02	3125.41	0.559398	-0.838053	6.06412e-08	8.67946e-07
	TMEM191A	681.736	367.916	0.559529	-0.837716	0.000209729	0.00137804
	PAQR8	248.74	127.243	0.559755	-0.837131	0.00628334	0.0258219
	MED30	694.834	373.309	0.5598	-0.837017	0.00012673	0.000891137
	PYCR1	13137.5	7199.37	0.560077	-0.836303	1.73454e-09	3.14509e-08
	DKC1	9345.68	5182.74	0.560193	-0.836005	1.40457e-09	2.56713e-08
	CCDC74A	696.69	393.93	0.560283	-0.835773	0.000550424	0.00324115
	GDPD1	350.365	184.591	0.560347	-0.835607	0.00207978	0.0101231
	BCS1L	1608.58	901.165	0.560523	-0.835156	3.07629e-06	3.182e-05
	GALM	689.113	376.049	0.560754	-0.83456	0.000152797	0.00104603
	LINC00339	455.548	241.858	0.560998	-0.833931	0.00081579	0.00455261
	THOC1	748.877	403.964	0.561256	-0.833268	0.000103109	0.000741755
	RFWD3	3158.31	1722.45	0.561383	-0.832942	2.42587e-07	3.10322e-06
	NOP2	2422.4	1323.88	0.561618	-0.832338	4.72351e-07	5.71737e-06
	KIAA0586	344.91	183.715	0.561797	-0.83188	0.00240784	0.0114479
	VGF	2741.59	1515.1	0.561845	-0.831757	1.2927e-07	1.75506e-06
	TRMT1	2398.82	1290.9	0.561867	-0.831698	7.92885e-07	9.223e-06
	NUP37	1183.32	638.92	0.562021	-0.831304	4.56082e-05	0.000362699
	TBC1D4	217.7	113.68	0.562055	-0.831217	0.00968058	0.0367873
	NFIX	1310.75	699.433	0.56278	-0.829358	9.16436e-06	8.63697e-05
	MNX1	656.351	357.879	0.563066	-0.828623	0.000251898	0.00163015
	PKN3	1055.5	578.636	0.563132	-0.828454	1.99368e-05	0.000173088
	SLBP	3125.99	1738.4	0.56334	-0.827922	8.2728e-08	1.16107e-06
	SRSF2	13108.5	7444.42	0.563566	-0.827343	4.76595e-08	6.9593e-07
	RRP9	2665.41	1465.53	0.563657	-0.827112	1.96203e-07	2.5551e-06
	OIP5-AS1	439.621	239.879	0.564034	-0.826147	0.00125593	0.00660748
	HNRNPA3	4601.62	2572.94	0.564409	-0.825186	5.26417e-08	7.60589e-07
	SLC39A4	4154.16	2325.97	0.565145	-0.823307	8.1845e-08	1.15103e-06
	ABHD3	332.361	175.895	0.565175	-0.82323	0.00294537	0.0135907
	HHEX	605.246	314.434	0.565367	-0.82274	0.000654667	0.00375667
	GEMIN4	2069.27	1144.77	0.565464	-0.822492	7.45513e-07	8.70886e-06
	ZNF789	253.511	122.041	0.565644	-0.822033	0.0115097	0.0424682
	PHB2	18010.1	9998.54	0.565817	-0.821593	8.9308e-09	1.45414e-07
	PPT1	4516.91	2492.97	0.566047	-0.821006	4.0298e-08	5.94125e-07
	CCDC85B	8470.85	4643.16	0.566236	-0.820524	1.36414e-08	2.15468e-07
	SLC25A37	943.005	521.148	0.566358	-0.820214	4.40641e-05	0.000351846
	POLR3K	4319.76	2417.66	0.566505	-0.81984	7.04218e-08	9.97533e-07
	CCSAP	355.691	189.655	0.567206	-0.818056	0.0024681	0.0116979
	RPLP1	21029.7	11815.8	0.567211	-0.818043	1.08462e-09	2.01455e-08
	SNRPD1	4987.86	2719.23	0.567272	-0.817887	4.1129e-06	4.16018e-05
	DCK	633.063	340.565	0.56753	-0.817231	0.000551602	0.00324669
	RUVBL2	16807	9340.99	0.567545	-0.817193	5.32732e-09	8.98315e-08
	SAPCD2	16971.4	9397.55	0.568438	-0.814925	2.27876e-09	4.07269e-08
	TFAP4	1654.68	904.451	0.568793	-0.814023	5.29197e-06	5.22573e-05
	BCAT2	3968.08	2199.89	0.56906	-0.813348	1.24862e-07	1.69857e-06
	ING5	1038.34	584.679	0.569421	-0.812432	3.18971e-05	0.000263588
	PNPT1	849.772	470.047	0.569907	-0.811201	7.3677e-05	0.000553498
	HNRNPAB	42060.1	23568.4	0.570139	-0.810614	6.98884e-10	1.33606e-08
	RRP7B	348.558	183.754	0.570252	-0.810329	0.00323279	0.0147302
	EMG1	4196.59	2369.24	0.570613	-0.809416	5.08992e-08	7.38523e-07
	EXOC6	380.059	203.043	0.570642	-0.809343	0.00246405	0.0116827
	NTHL1	3589.9	1994.91	0.571687	-0.806703	1.50697e-07	2.00776e-06
	CCDC78	354.19	190.901	0.571717	-0.806628	0.00362243	0.0162223
	BLMH	1472.32	823.229	0.571723	-0.806612	5.40943e-06	5.33021e-05
	C14orf80	5108.78	2836.18	0.571867	-0.806249	7.46546e-08	1.05531e-06
	DLX1	336.603	181.462	0.571915	-0.806127	0.00413903	0.0181393
	RAVER1	6495.78	3657.02	0.572051	-0.805784	1.27511e-08	2.02337e-07
	TRMU	1517.93	816.246	0.57228	-0.805207	2.17822e-05	0.000187332
	TOMM5	4403.52	2396.38	0.572316	-0.805115	1.00118e-06	1.14135e-05
	TTI1	1289.22	721.034	0.572452	-0.804775	1.08767e-05	0.000100265
	POLD2	10144.9	5678.94	0.572626	-0.804335	5.1448e-08	7.45697e-07
	RTN4RL2	216.884	114.979	0.573624	-0.801822	0.0136838	0.0489889
	SFXN4	2216.91	1250.8	0.573854	-0.801244	9.48654e-07	1.08691e-05
	LRRC3	225.168	118.629	0.573906	-0.801114	0.0104381	0.0391458
	DPY19L1	663.378	374.001	0.573924	-0.801069	0.000485813	0.00290177
	BCL11B	371.358	193.248	0.574105	-0.800614	0.00535248	0.0225293
	ANKRD28	1414.21	800.147	0.574249	-0.800253	8.82815e-06	8.33392e-05
	FPGS	5277.92	2919.59	0.574617	-0.799327	8.03363e-07	9.31331e-06
	FBXO4	282.919	153.223	0.574632	-0.799291	0.00760662	0.0302633
	HNRNPU	8133.4	4631.61	0.574659	-0.799222	1.1526e-08	1.84604e-07
	MT2A	1310.83	724.886	0.574778	-0.798923	3.48178e-05	0.000285149
	MRPL17	8274.4	4729.76	0.574808	-0.798848	1.28033e-08	2.02931e-07
	PPFIBP2	207.538	108.466	0.575051	-0.798238	0.0131609	0.0474139
	DHX9	4020.34	2284.34	0.575091	-0.798138	8.58719e-08	1.20151e-06
	NUP205	1354.54	768.409	0.575174	-0.797929	1.23903e-05	0.000112629
	NAF1	572.975	314.471	0.575245	-0.797752	0.000627236	0.00362127
	MIIP	2527.58	1421.38	0.575248	-0.797744	9.50773e-07	1.08843e-05
	SMARCA2	787.468	441.69	0.575361	-0.797461	0.000141486	0.000980726
	ICAM3	1743.5	963.542	0.575467	-0.797194	1.15644e-05	0.000105822
	PFAS	507.513	282.64	0.575912	-0.796079	0.00133367	0.00694987
	SLC16A1	417.64	230.482	0.576173	-0.795426	0.00225406	0.0108407
	PRCP	1135.96	640.139	0.576781	-0.793905	2.63467e-05	0.000222957
	NLN	2105.88	1196.56	0.576982	-0.793403	1.86373e-06	2.02136e-05
	LIAS	439.888	243.005	0.577028	-0.793286	0.00157839	0.00803074
	IPO9	2361.73	1340.05	0.577148	-0.792986	8.56433e-07	9.89511e-06
	PRADC1	1654.88	932.197	0.577218	-0.792811	4.64485e-06	4.63338e-05
	PGAM5	7284.92	4110.39	0.577327	-0.79254	3.02941e-08	4.59466e-07
	CWF19L1	1248.48	706.211	0.577397	-0.792365	2.14457e-05	0.000185018
	LOC646762	309.341	167.965	0.577554	-0.791972	0.004809	0.0206534
	POLR2I	10039.3	5735.68	0.577885	-0.791145	1.28346e-08	2.03193e-07
	CCNF	3737.76	2112.03	0.577955	-0.790971	2.766e-07	3.50564e-06
	METTL3	1326.98	758.921	0.578069	-0.790686	2.73605e-05	0.000230125
	CXCL12	2968.63	1670.97	0.578154	-0.790475	4.64936e-07	5.64253e-06
	LARS2	569.617	315.287	0.578461	-0.789708	0.000841322	0.00467909
	PCNT	1902.99	1094.8	0.578584	-0.789401	8.37063e-06	7.94573e-05
	RPL13AP6	264.935	143.238	0.578742	-0.789008	0.00770858	0.0305627
	DCLRE1B	6498.82	3717.01	0.578767	-0.788946	8.3018e-08	1.16395e-06
	BRIX1	3450.26	1976.81	0.57889	-0.78864	7.58459e-07	8.85256e-06
	RNF26	4861.04	2759.91	0.579526	-0.787054	5.58165e-07	6.66206e-06
	FOXRED2	2335.39	1272.58	0.579987	-0.785907	6.66104e-06	6.47518e-05
	LINGO1	1211.05	689.934	0.580288	-0.785158	2.49642e-05	0.0002127
	ASPHD1	1085.1	612.238	0.580342	-0.785024	4.14545e-05	0.000333336
	ZMYM3	1870.74	1069.97	0.580705	-0.784123	4.52577e-06	4.52775e-05
	FZD9	299.269	162.677	0.581424	-0.782337	0.00593661	0.024581
	HSPA13	830.66	468.754	0.58151	-0.782125	0.000139286	0.00096949
	RPL13AP20	465.976	253.487	0.582325	-0.780104	0.00286628	0.0132914
	SULF1	1770.35	1039.93	0.582343	-0.78006	0.000247018	0.00160083
	NEURL4	1144.62	649.183	0.583219	-0.77789	3.82776e-05	0.000311071
	UCHL5	2578.59	1482.81	0.583298	-0.777696	5.90257e-06	5.79119e-05
	HAGHL	3692.46	2119.51	0.583318	-0.777645	2.76997e-07	3.50744e-06
	COL12A1	597.872	344.08	0.583328	-0.77762	0.00217107	0.0104927
	HSPH1	5552.61	3198.3	0.583448	-0.777323	6.70715e-08	9.53026e-07
	PWP2	1620.06	926.575	0.583558	-0.777052	7.55094e-06	7.25292e-05
	TMEM177	1352.05	770.376	0.583575	-0.777011	2.44806e-05	0.000208838
	CLEC2D	1090.9	603.953	0.583646	-0.776835	0.000135372	0.000944648
	PHKA2	719.206	408.091	0.583721	-0.77665	0.000856907	0.00475037
	SMPD4	5073.91	2892	0.583781	-0.776501	2.52768e-07	3.22144e-06
	PBX3	825.27	471.555	0.584744	-0.774124	0.000205178	0.00135138
	SHISA2	2458.53	1409.05	0.584763	-0.774077	1.34139e-06	1.48843e-05
	C6orf211	6357.46	3586.45	0.585191	-0.773019	4.87813e-07	5.88894e-06
	TPP2	412.711	231.013	0.585245	-0.772888	0.00246245	0.0116792
	CCDC58	1532.18	873.919	0.585389	-0.772532	1.26817e-05	0.000115049
	LEPRE1	747.684	422.762	0.585463	-0.772349	0.000429233	0.00260002
	NXT1	4530.99	2612.46	0.585997	-0.771034	1.86801e-07	2.43961e-06
	NOC3L	427.914	242.499	0.586199	-0.770537	0.00274475	0.0128014
	RPS16	64523.9	37323	0.586672	-0.769373	5.28297e-09	8.93029e-08
	RPL27	28693.6	16903.2	0.586848	-0.768942	8.81407e-07	1.01495e-05
	POLR1B	1269.38	726.576	0.587103	-0.768316	3.18253e-05	0.000263153
	RHNO1	2088.79	1196.29	0.587306	-0.767815	4.09801e-06	4.14818e-05
	SMC6	844.844	481.511	0.587468	-0.767418	0.000179421	0.00120192
	NKTR	525.362	300.123	0.587531	-0.767263	0.00133173	0.00694502
	YEATS4	1128.75	633.072	0.587627	-0.767026	0.000748939	0.00422174
	SMCO4	279.095	150.855	0.587735	-0.766763	0.010222	0.0384826
	HYLS1	989.4	570.966	0.58776	-0.766702	0.000118214	0.000838991
	TLN2	491.008	273.691	0.587903	-0.76635	0.00223135	0.010739
	ECHDC3	712.442	407.341	0.588853	-0.764021	0.000370358	0.00228064
	PRKDC	1713.67	1011.49	0.589072	-0.763485	1.35542e-05	0.00012264
	C9orf116	2013.02	1162.05	0.589254	-0.763039	1.20762e-05	0.000110138
	U2SURP	1342.79	776.921	0.589998	-0.761219	2.70911e-05	0.000228411
	NOP58	4623.95	2698.73	0.590305	-0.760467	1.99405e-07	2.59434e-06
	CARHSP1	12740.8	7396.25	0.590366	-0.760319	3.53113e-08	5.26829e-07
	MYB	1842.62	1069.04	0.591135	-0.758441	1.04408e-05	9.66358e-05
	TCOF1	9322.75	5355.09	0.592371	-0.755427	5.23561e-06	5.17379e-05
	MRPS25	8795.24	5199.87	0.592437	-0.755266	8.90184e-08	1.23796e-06
	SRR	694.326	393.49	0.59276	-0.754481	0.00107031	0.00576797
	COQ3	617.909	353.265	0.593484	-0.752719	0.00109909	0.0058916
	SLC16A14	492.023	281.345	0.593505	-0.752667	0.001766	0.00882067
	PRKAR1B	5631.33	3451.67	0.59355	-0.752559	6.27893e-07	7.44897e-06
	L2HGDH	891.547	512.119	0.594327	-0.75067	0.000316248	0.00198756
	RASSF8	373.078	210.782	0.594417	-0.750453	0.00479691	0.0206144
	MST4	2499.92	1466.03	0.594425	-0.750432	2.93608e-06	3.04793e-05
	UTP18	3210.2	1883.33	0.594741	-0.749666	1.02057e-06	1.1606e-05
	TCIRG1	628.802	361.03	0.594759	-0.749622	0.000967242	0.0052684
	DDX51	1827.54	1026.75	0.59487	-0.749354	2.92816e-05	0.000244923
	DDX46	4673.97	2743.78	0.594895	-0.749292	2.85878e-07	3.6099e-06
	PRR24	1475.23	855.925	0.594992	-0.749058	3.02507e-05	0.000252414
	PRPF39	456.964	260.313	0.595331	-0.748237	0.00237062	0.0112983
	KREMEN2	3414.61	1996.16	0.595794	-0.747114	1.32958e-06	1.47772e-05
	SVIP	1936.01	1134.24	0.595953	-0.746728	7.54582e-06	7.25292e-05
	VPRBP	483.562	279.175	0.596365	-0.745733	0.00210814	0.0102357
	CNTROB	2042.21	1195.35	0.596993	-0.744214	7.25856e-06	7.00147e-05
	NAE1	1881.49	1098.86	0.597	-0.744198	9.91647e-06	9.24056e-05
	NT5C3A	1259.75	737.507	0.597153	-0.743829	9.60582e-05	0.000699096
	NARS2	974.615	566.752	0.597204	-0.743705	0.000147364	0.00101491
	ACYP1	307.396	171.381	0.59737	-0.743304	0.00840171	0.0327712
	RPA3	3093.66	1735.21	0.597891	-0.742046	3.71806e-05	0.000302873
	USP1	1817.72	1071.61	0.597893	-0.74204	2.83928e-05	0.000238361
	SORD	1415.99	819.811	0.597991	-0.741803	4.85145e-05	0.000383147
	ID2	1439.58	840.784	0.598314	-0.741025	5.26437e-05	0.000411262
	CERK	1620.27	957.987	0.598374	-0.74088	3.17998e-05	0.000263101
	IFRD1	1415.54	847.71	0.59839	-0.740843	6.31514e-05	0.00048534
	C1QBP	14508.3	8596.01	0.598548	-0.740461	3.67494e-08	5.44145e-07
	LMNB2	10631	6168.32	0.599	-0.739372	2.92987e-06	3.04471e-05
	MUM1	1560.98	918.475	0.599257	-0.738754	3.2368e-05	0.000266677
	PRPS1	2136.72	1258.17	0.599417	-0.738369	9.86025e-06	9.19441e-05
	TRERF1	1009.92	592.727	0.599519	-0.738124	0.000146195	0.00100834
	DPYSL5	1201.34	686.889	0.599928	-0.737138	0.00025845	0.00166784
	ARL2	4890.49	2884.97	0.600628	-0.735457	5.51268e-07	6.60271e-06
	TMEM254-AS1	340.606	183.437	0.600913	-0.734773	0.00971081	0.0368817
	DDX23	9805.14	5830.61	0.600922	-0.734751	8.71863e-08	1.21866e-06
	RPL22L1	2307.63	1389.11	0.601163	-0.734171	4.71246e-05	0.000373459
	PRPF4	4632.65	2747.68	0.601238	-0.733992	4.94384e-07	5.96302e-06
	EMC1	1218.27	719.192	0.601271	-0.733912	7.30973e-05	0.000549772
	FMNL3	524.571	299.228	0.601338	-0.733751	0.00266605	0.0124724
	AK2	5989.56	3585.62	0.601434	-0.733521	5.7198e-07	6.81511e-06
	IMMP1L	347.006	190.535	0.60194	-0.732307	0.00863691	0.0334509
	NOP16	9650.11	5864.57	0.602523	-0.730911	1.11861e-06	1.26371e-05
	CENPW	3062.78	1788.44	0.602589	-0.730755	1.83517e-05	0.000160443
	ZNF714	502.037	283.423	0.602887	-0.730039	0.0039592	0.0174796
	DHODH	1821.67	1082.59	0.602929	-0.729939	2.11556e-05	0.00018286
	SMKR1	649.389	375.975	0.603055	-0.729639	0.00101434	0.00550528
	RND2	653.63	384.983	0.603424	-0.728756	0.000939196	0.00513397
	FAM92A1	993.905	587.264	0.60354	-0.728478	0.000227765	0.00148518
	SSB	5783.04	3450.57	0.603581	-0.72838	1.17211e-06	1.3198e-05
	BLOC1S1	2112.8	1217.15	0.603738	-0.728005	7.37137e-05	0.000553498
	NUDC	12742.4	7477.33	0.60383	-0.727785	2.24383e-07	2.8919e-06
	SKA2	4515.16	2644.91	0.604172	-0.726969	2.34712e-06	2.49162e-05
	NTMT1	16415	9807.5	0.604857	-0.725334	6.34141e-08	9.05746e-07
	ARHGEF25	1189.83	697.965	0.604945	-0.725123	0.000105042	0.00075448
	USP13	1131.21	670.81	0.605181	-0.724562	0.000117383	0.000833523
	NLE1	1722.22	1000.64	0.605466	-0.723881	0.000172997	0.00116514
	FKBP4	30222.9	17628.1	0.605514	-0.723767	5.54558e-07	6.63054e-06
	NUP93	1557.36	925.323	0.607321	-0.719469	4.49542e-05	0.00035812
	RRN3	2196.1	1313.27	0.607592	-0.718824	9.85916e-06	9.19441e-05
	POMT1	2750.92	1653.31	0.607676	-0.718625	4.57463e-06	4.57329e-05
	PRMT1	29264.8	17616.1	0.608167	-0.717461	4.88203e-08	7.10613e-07
	C9orf142	5173.62	3067.34	0.608234	-0.717302	1.6816e-06	1.83955e-05
	MRPL16	3129.65	1879.05	0.608317	-0.717105	5.32097e-06	5.25059e-05
	TMEM38B	1403.79	838.207	0.608568	-0.71651	5.98399e-05	0.000463261
	SLC19A1	2665.82	1579.66	0.6089	-0.715723	1.5441e-05	0.000137625
	ZNF692	661.147	387.494	0.609076	-0.715306	0.00177266	0.00884142
	LYRM4	1276.61	765.934	0.60914	-0.715154	9.70583e-05	0.000705253
	EMC9	3541.88	2126.54	0.609151	-0.715127	2.12726e-06	2.28651e-05
	TTC27	662.957	391.878	0.609177	-0.715066	0.00104565	0.00564841
	RNF157	420.554	249.367	0.609515	-0.714265	0.00500011	0.0212877
	NCBP1	2755.73	1655.96	0.609823	-0.713537	4.99686e-06	4.9557e-05
	NR2C2AP	3971.26	2404.63	0.609894	-0.713369	1.9233e-06	2.08195e-05
	C19orf40	503.096	291.741	0.610154	-0.712755	0.00542225	0.0227811
	QTRTD1	814.758	484.703	0.610336	-0.712324	0.000519227	0.00307725
	KCTD15	2383.47	1425.11	0.610388	-0.712201	1.53436e-05	0.000137024
	SALL2	1036.8	662.975	0.610636	-0.711615	0.00155649	0.00793037
	SOAT1	670.954	400.66	0.610679	-0.711515	0.00170683	0.00857226
	ACTL6A	3137.47	1895.03	0.611185	-0.710319	6.53511e-06	6.36628e-05
	SMYD5	3213.37	1910.98	0.611525	-0.709516	6.41421e-06	6.25294e-05
	CSE1L	5978.97	3607.24	0.611585	-0.709375	9.02219e-07	1.03631e-05
	C4orf27	567.206	335.291	0.612164	-0.70801	0.00247987	0.0117415
	KLHDC4	3231.21	1949.87	0.61222	-0.707878	3.56686e-06	3.64276e-05
	CENPV	537.846	321.132	0.612309	-0.707668	0.00366881	0.0164086
	MAP3K6	868.574	518.706	0.61231	-0.707667	0.000547945	0.00322932
	DHX33	1646.38	965.839	0.612321	-0.70764	7.1056e-05	0.000535887
	RPARP-AS1	581.657	342.491	0.612652	-0.70686	0.00229156	0.0109787
	NDUFAF2	2581.49	1544.24	0.612698	-0.706751	1.17285e-05	0.000107181
	SACS	411.741	241.78	0.612741	-0.706652	0.00531564	0.0224086
	LSG1	4910.87	2988.97	0.613687	-0.704424	1.28063e-06	1.4291e-05
	DPYSL2	770.53	460.02	0.614177	-0.703273	0.000748818	0.00422174
	SF3B3	8818.15	5385.39	0.614351	-0.702866	1.6247e-06	1.7812e-05
	ILF2	18052.7	10978.5	0.614526	-0.702453	1.35945e-07	1.83299e-06
	RAD21	8437.31	5119.73	0.614573	-0.702343	4.14989e-07	5.07225e-06
	C4orf48	7695.23	4517.2	0.614601	-0.702277	0.000169354	0.00114285
	SAAL1	890.667	534.791	0.614865	-0.701658	0.000453735	0.00273396
	SLIRP	11867.8	7204.24	0.615087	-0.701137	1.12503e-05	0.000103292
	TMEM201	1855.89	1087.7	0.615164	-0.700958	9.26037e-05	0.000677909
	GLA	4417.67	2658.73	0.615193	-0.700888	2.89375e-06	3.01134e-05
	TRA2B	10357.2	6317.49	0.615241	-0.700777	4.01923e-07	4.93011e-06
	GAR1	1755.53	1067.55	0.615275	-0.700697	0.000389654	0.00238555
	HSP90AA1	66806.9	39597.9	0.615455	-0.700275	1.27004e-06	1.41843e-05
	GPR68	573.636	345.866	0.615547	-0.700059	0.00374025	0.0167009
	EPOR	377.562	224.571	0.615691	-0.699722	0.00758614	0.0302072
	MZT1	561.835	330.622	0.615961	-0.69909	0.00248823	0.0117649
	MCMBP	3362.05	2041.47	0.616064	-0.698848	4.11667e-06	4.16093e-05
	FKBP11	1797.84	1087.1	0.616067	-0.698841	3.50607e-05	0.000286967
	ENTPD2	1742.48	1032.19	0.616303	-0.698288	0.000303146	0.00191486
	NUDCD1	1785.39	1073	0.616327	-0.698232	0.000146262	0.00100834
	DDX55	2307.39	1405.88	0.616679	-0.697407	1.5599e-05	0.000138906
	TCTN2	591.199	353.475	0.616727	-0.697295	0.00200194	0.00981731
	EIF2B3	1540.99	945.367	0.616927	-0.696828	7.84768e-05	0.000583833
	FH	2223.28	1342.31	0.616932	-0.696816	2.00516e-05	0.000173975
	TUBA1C	19838.9	12254.5	0.617045	-0.696553	5.08438e-07	6.1164e-06
	RAN	29035.1	17837.9	0.617051	-0.696539	1.49289e-07	1.99138e-06
	HNRNPR	5091.18	3121.75	0.617177	-0.696244	1.92493e-06	2.08208e-05
	LRRC20	1930.94	1177.3	0.61732	-0.695908	3.04336e-05	0.000253786
	FN3KRP	2992.22	1835.09	0.617605	-0.695244	8.41503e-06	7.97158e-05
	PODXL2	6141.92	3704.31	0.617615	-0.69522	2.11825e-06	2.2804e-05
	LSM2	6272.35	3772.79	0.618093	-0.694104	1.71239e-06	1.87014e-05
	RP9P	454.957	265.63	0.618111	-0.694061	0.00585479	0.0243229
	ISY1	3214.91	1979.23	0.618467	-0.693232	8.19512e-06	7.80071e-05
	CKAP5	2832.16	1775.06	0.618624	-0.692865	7.66801e-05	0.000571086
	SLC7A1	3899.49	2383.86	0.618732	-0.692613	6.80705e-06	6.58447e-05
	C9orf40	690.065	415.675	0.619544	-0.690722	0.00131659	0.00688702
	RPL18	57570.2	34857.7	0.620027	-0.689597	5.56241e-07	6.64488e-06
	PPM1E	389.337	239.271	0.620096	-0.689437	0.00995323	0.0376561
	NAA10	25501.5	15528.4	0.620387	-0.68876	2.37407e-07	3.04547e-06
	PPIH	2297.12	1367.78	0.620532	-0.688422	6.61258e-05	0.000505369
	RPS21	32552	19644.9	0.620722	-0.68798	4.59768e-06	4.593e-05
	NOC4L	2977.73	1811.31	0.62099	-0.687358	9.81131e-06	9.16123e-05
	CNPY4	604.809	365.406	0.62103	-0.687265	0.0023461	0.0112009
	SLC2A4RG	12926	7943.45	0.621033	-0.687258	3.61133e-07	4.46971e-06
	C19orf48	8059.88	4882.47	0.621309	-0.686616	3.09883e-05	0.000257162
	DNPEP	10471.2	6432.42	0.621378	-0.686457	4.96747e-07	5.98626e-06
	KAT2A	3300.93	1970.72	0.621433	-0.68633	2.66177e-05	0.000224972
	CDV3	10532.2	6460.04	0.621613	-0.685911	5.19447e-07	6.23245e-06
	FSD1	2521.8	1526.85	0.621648	-0.68583	0.000103077	0.000741755
	PTDSS1	7435.44	4490.1	0.622258	-0.684415	6.62243e-06	6.4422e-05
	DIAPH2	438.449	270.385	0.622273	-0.684381	0.0080511	0.0316918
	CD3EAP	3343.71	2069.84	0.622983	-0.682736	7.34586e-06	7.07078e-05
	RPL35	65805.2	40692	0.623151	-0.682347	1.55017e-07	2.05581e-06
	BRCC3	1419.64	860.38	0.623191	-0.682255	0.000140753	0.000977187
	FAM195A	3666.34	2186.92	0.623246	-0.682127	9.73292e-05	0.000706473
	ST7	611.04	367.852	0.623473	-0.681602	0.0036089	0.0161776
	NQO2	2855.37	1757.94	0.623484	-0.681575	1.16582e-05	0.000106609
	PAXBP1	719.311	421.323	0.623509	-0.681518	0.00432221	0.0188518
	SNHG9	792.264	485.754	0.623681	-0.681121	0.00132027	0.00690362
	ANKHD1	405.731	242.839	0.623914	-0.680581	0.0073755	0.0295321
	SLC27A3	2593.58	1581.47	0.623953	-0.68049	2.12526e-05	0.000183583
	PRPF19	11016.9	6609.36	0.623972	-0.680447	2.81027e-06	2.9356e-05
	RNASEH2B	1477.49	905.206	0.624155	-0.680023	0.000110036	0.000788286
	THYN1	1282.45	788.152	0.624625	-0.678939	0.000197238	0.00130598
	RIF1	562.851	339.493	0.624673	-0.678826	0.00309051	0.0141496
	FJX1	1714.12	1052.5	0.624872	-0.678367	7.38943e-05	0.000554551
	TUBGCP5	389.782	233.709	0.624982	-0.678113	0.00839453	0.0327618
	C2orf81	2078.48	1275.65	0.62534	-0.677288	7.41797e-05	0.000556388
	ALYREF	20657.9	12735.1	0.625407	-0.677134	3.64931e-07	4.51266e-06
	DIAPH3	629.638	376.71	0.625431	-0.677078	0.00290914	0.0134447
	TIMM50	5604.07	3454.28	0.625846	-0.676121	2.44965e-06	2.59043e-05
	WDR24	1964.49	1177.68	0.625895	-0.676007	0.000104717	0.000752537
	RPP40	1625.25	1013.12	0.626166	-0.675383	0.000123722	0.000874017
	RFT1	1502.06	913.612	0.626235	-0.675225	0.000257577	0.00166455
	ATIC	8181.08	5013.32	0.626291	-0.675095	5.06368e-06	5.01473e-05
	MRE11A	439.932	264.964	0.626421	-0.674796	0.00748042	0.0298825
	TPR	2480.88	1567.8	0.626829	-0.673855	4.87176e-05	0.000383428
	XPO5	2074.41	1288.15	0.6271	-0.673233	8.60944e-05	0.000634657
	TAF6	7263.85	4506.24	0.627343	-0.672673	2.99395e-06	3.10151e-05
	GINS4	1255.98	751.53	0.627467	-0.672388	0.000370707	0.00228176
	ILF3	11540.9	7181.66	0.62747	-0.672382	1.71264e-06	1.87014e-05
	TCERG1	1315.68	810.705	0.627479	-0.67236	0.000196335	0.00130251
	TMEM97	2227.62	1349.34	0.627527	-0.67225	9.89065e-05	0.000716785
	RAC3	2948.97	1838.18	0.627529	-0.672246	3.12741e-05	0.00025922
	PLCG1	3872.1	2470.51	0.627587	-0.672113	3.05503e-05	0.00025445
	FLJ44635	1482.51	916.242	0.627668	-0.671927	0.000266708	0.00171468
	RABEPK	2618.97	1626.96	0.627813	-0.671594	2.0278e-05	0.000175828
	BCLAF1	2201.79	1353.29	0.627912	-0.671365	6.29385e-05	0.000483974
	CCNL1	899.788	551.812	0.627958	-0.671261	0.000742302	0.00419812
	GPRIN1	3168.65	1989.19	0.628053	-0.671041	2.15111e-05	0.000185349
	PPP1R3C	381.451	234.924	0.628148	-0.670823	0.0125347	0.0456174
	ELOVL5	2352.55	1461.89	0.628169	-0.670775	3.23406e-05	0.000266677
	TRIM28	32262	19560.4	0.62831	-0.670452	2.93779e-06	3.04793e-05
	HIP1	2378.91	1435.45	0.628355	-0.670348	0.000744737	0.00420496
	ARHGEF26	564.955	345.57	0.62848	-0.670062	0.00347519	0.01566
	VARS	5087.73	3162.48	0.628563	-0.669871	3.43283e-06	3.51898e-05
	CHD1L	3427.23	2139.65	0.628706	-0.669543	1.57368e-05	0.000139899
	RIPPLY3	662.487	408.19	0.628929	-0.669031	0.00221336	0.0106599
	SART3	2799.69	1736.11	0.629049	-0.668755	2.19715e-05	0.000188842
	SMC3	1084.35	671.878	0.629377	-0.668004	0.000483392	0.00288856
	TDP1	2159.25	1348.35	0.629489	-0.667746	7.02212e-05	0.000530758
	MRPL4	13117.7	8039.48	0.629717	-0.667225	3.36261e-06	3.45214e-05
	TP53BP1	689.289	426.445	0.630124	-0.666293	0.00209293	0.0101798
	PTPLAD1	5877.29	3615.9	0.630261	-0.66598	1.09695e-05	0.000100984
	C2orf15	936.216	564.441	0.630307	-0.665874	0.0015315	0.0078292
	NOL11	2778.77	1735.24	0.630311	-0.665865	4.03696e-05	0.000325757
	IRX3	1550.98	942.68	0.630333	-0.665815	0.000201051	0.00132866
	ARAP1	2175.02	1362.54	0.630979	-0.664336	9.00782e-05	0.000660125
	RBM14	2966.88	1825.07	0.631105	-0.664047	8.92583e-05	0.000655165
	SNRNP25	5278.76	3240.22	0.631414	-0.663341	0.000140819	0.000977187
	SLC29A2	2353.21	1462.37	0.631521	-0.663096	0.000193689	0.00128683
	COLGALT1	3315.7	2053.99	0.631549	-0.663033	1.65452e-05	0.00014661
	STRA13	13996.9	8690.19	0.631747	-0.662581	2.20211e-06	2.36326e-05
	RPL18A	12467.9	7490.15	0.631773	-0.662521	8.95822e-05	0.000657191
	LSM8	1634.96	990.473	0.631822	-0.662409	0.000593482	0.00345974
	NFYB	1378.4	846.391	0.631884	-0.662268	0.000309896	0.00195121
	NAA15	1997.76	1245.89	0.632173	-0.66161	6.28353e-05	0.000483451
	DNLZ	3920.89	2479.99	0.632286	-0.661352	9.78006e-06	9.14449e-05
	NEDD1	1162.34	721.088	0.632486	-0.660894	0.000378914	0.00232498
	RBM6	1606.86	991.302	0.632715	-0.660373	0.000177552	0.00119056
	MAPT	2023.96	1259.73	0.632747	-0.660298	0.00013415	0.000937069
	TOE1	532.922	326.595	0.632964	-0.659804	0.00451303	0.0195831
	TIMM10	6368.87	3989.35	0.633024	-0.659667	6.76808e-06	6.56415e-05
	HEBP1	2682.04	1661.58	0.633137	-0.659411	3.93387e-05	0.000318563
	LSM6	1033.71	636.826	0.633192	-0.659285	0.000780027	0.00438079
	SIMC1	531.591	323.726	0.633721	-0.658081	0.0048857	0.0209109
	PACSIN1	1631.94	1017.46	0.633749	-0.658016	0.000127699	0.0008966
	MAGOHB	1133.51	706.883	0.633951	-0.657556	0.000949757	0.00518345
	RERG	774.212	477.512	0.634077	-0.65727	0.00155264	0.00791956
	SYT3	386.047	236.523	0.634323	-0.65671	0.0119204	0.0438093
	XRCC5	11713.9	7360.27	0.634607	-0.656066	1.32211e-06	1.47061e-05
	C3orf14	4289.56	2653.63	0.634725	-0.655797	0.000166732	0.00112571
	RPA1	4402.98	2765.21	0.635036	-0.65509	7.84585e-06	7.50468e-05
	BMS1	2141.79	1342.67	0.635185	-0.65475	6.06439e-05	0.000468166
	CDC25B	9847.35	6163.77	0.635337	-0.654405	2.4592e-06	2.59454e-05
	CCP110	1084.99	676.442	0.635661	-0.653669	0.000587371	0.00342865
	HTATSF1	4925.16	3098.83	0.635867	-0.653203	7.70999e-06	7.39018e-05
	SRSF1	14059.9	8768.46	0.635879	-0.653175	1.61161e-06	1.76827e-05
	ACTR5	715.034	435.49	0.63601	-0.652878	0.00252768	0.0119268
	TPMT	955.349	584.399	0.636102	-0.65267	0.00152838	0.00781617
	SRM	10591	6769.95	0.63624	-0.652357	3.17416e-06	3.2783e-05
	USP28	558.459	344.476	0.636323	-0.652169	0.00436584	0.0190119
	NUDT21	4691.11	2960.57	0.63654	-0.651676	1.38597e-05	0.000124992
	NCOA7	420.136	257.326	0.63663	-0.651473	0.00996564	0.0376827
	RPL27A	19518	12276.2	0.636639	-0.651452	1.09668e-06	1.23995e-05
	TOP3A	1296.18	797.171	0.636824	-0.651033	0.000446187	0.0026944
	TUBB4B	53071.9	33666.9	0.636846	-0.650984	6.10424e-07	7.248e-06
	RPL19	41311.5	26012.9	0.636919	-0.650818	6.61311e-07	7.82513e-06
	MRPS2	13125	8195.13	0.63732	-0.64991	2.12588e-06	2.28651e-05
	NUP88	2396.66	1502.32	0.637386	-0.64976	5.25387e-05	0.000410676
	QPCTL	1129.25	706.766	0.637719	-0.649006	0.000522258	0.00309121
	PLP2	7497.47	4664.67	0.63772	-0.649004	8.3633e-06	7.94427e-05
	FASTKD2	1054.16	665.583	0.637766	-0.648902	0.000755521	0.00425534
	WDR4	2103.49	1333.87	0.637997	-0.648378	0.00015314	0.00104786
	TFPI2	628.808	411.69	0.638565	-0.647095	0.00459117	0.019842
	ACIN1	6277.29	3946.48	0.638864	-0.64642	1.92811e-05	0.000167714
	NUP133	722.207	450.79	0.639053	-0.645992	0.00226936	0.0108976
	AURKAIP1	23757.3	15156.9	0.639207	-0.645645	1.24425e-06	1.3953e-05
	PRDX4	8243.49	5225.92	0.639215	-0.645626	3.225e-06	3.32081e-05
	ISOC2	11323.9	7164.35	0.639254	-0.645539	2.01341e-06	2.17265e-05
	GMPS	3828.64	2417.13	0.639298	-0.64544	1.52615e-05	0.00013638
	NME2	1483.96	932.98	0.639386	-0.645242	0.000231594	0.00150729
	DCTPP1	22014.1	13954.1	0.639785	-0.644341	1.14861e-06	1.2944e-05
	ANAPC4	706.523	439.665	0.639803	-0.6443	0.00287011	0.0133002
	IKBKAP	1438.41	906.698	0.640434	-0.642879	0.000297415	0.00188473
	NDUFS3	9273.93	5905.28	0.640491	-0.64275	3.53273e-06	3.61369e-05
	NOP56	5862.27	3705.95	0.640565	-0.642582	6.35935e-06	6.20828e-05
	DCLRE1C	860.334	547.402	0.640615	-0.64247	0.00251371	0.0118772
	SLC46A1	970.028	594.636	0.640738	-0.642193	0.00454704	0.0197072
	PCNA	6382.17	4120.75	0.641574	-0.640312	1.8011e-05	0.000158069
	C6orf136	877.346	548.319	0.64179	-0.639826	0.00165786	0.00837532
	NUPL2	424.377	263.67	0.641804	-0.639795	0.0106808	0.0398816
	MANEAL	2816.85	1783.31	0.64207	-0.639197	3.90213e-05	0.000316552
	NUP153	1273.86	799.265	0.642207	-0.638889	0.000453068	0.00273114
	HSPD1	8534.02	5434.93	0.64229	-0.638704	4.64966e-06	4.63481e-05
	CBX3	12659.1	8116.58	0.642896	-0.637343	5.35037e-06	5.2758e-05
	ANP32C	578.497	363.028	0.643491	-0.636008	0.00810469	0.0318571
	NAA38	6666.04	4197.83	0.643558	-0.635857	3.40212e-05	0.000278791
	LOC728554	1650.2	1041.05	0.643592	-0.635781	0.00021422	0.00140419
	AFG3L1P	1424.62	908.592	0.64372	-0.635494	0.000452198	0.00272709
	MUC1	1813.3	1160.68	0.644502	-0.633743	0.000209293	0.00137584
	MRPL55	4408.11	2790.41	0.644559	-0.633615	1.70598e-05	0.000150781
	MTERFD2	998.013	630.514	0.644748	-0.633193	0.001029	0.00556722
	RAVER2	494.08	308.28	0.644831	-0.633006	0.00760885	0.0302634
	RPL15	52177.3	33423.4	0.644832	-0.633004	1.24797e-06	1.39834e-05
	HEATR1	624.78	394.14	0.644944	-0.632755	0.00514982	0.0218438
	CMC2	4180.32	2646.01	0.64495	-0.632741	2.9952e-05	0.000250074
	TNPO2	4180.91	2659.46	0.645439	-0.631647	2.73681e-05	0.000230125
	DDX10	614.486	385.566	0.645548	-0.631404	0.00444211	0.0193073
	PHTF2	895.654	562.615	0.645565	-0.631365	0.00154031	0.00786638
	SNRNP40	2330.23	1510.08	0.645998	-0.630399	0.000215832	0.00141274
	PNISR	1664.73	1060.04	0.646025	-0.630339	0.00022991	0.00149846
	DHX37	2931.57	1868.55	0.646199	-0.629951	4.47585e-05	0.000356768
	LSM5	2215.32	1317.95	0.646456	-0.629377	0.00411686	0.0180595
	DPAGT1	2774.47	1775.5	0.646777	-0.628659	5.46159e-05	0.000425217
	PPAT	694.085	437.86	0.646851	-0.628494	0.00403167	0.0177595
	FUBP1	2535.59	1616.91	0.646863	-0.628468	0.000111141	0.000795784
	TMEM121	1338.55	861.124	0.646909	-0.628365	0.00121713	0.00643294
	NUP214	1609.45	1032.74	0.647309	-0.627473	0.00047527	0.00284623
	SAMD1	4372.87	2736.41	0.647756	-0.626478	8.87057e-05	0.000652156
	PES1	8737.81	5635.86	0.647845	-0.626279	6.11117e-06	5.97876e-05
	SORBS3	2611.9	1707.91	0.648049	-0.625826	0.000424336	0.00257604
	PDCD2L	1265.56	804.696	0.648053	-0.625816	0.000572145	0.00334608
	ANAPC1	641.594	404.603	0.648183	-0.625528	0.00512821	0.0217588
	NSUN5	2804.39	1772.47	0.648304	-0.625257	8.59488e-05	0.000633925
	RAB3IL1	1197.54	757.781	0.648711	-0.624351	0.000806586	0.00450965
	EIF2S1	6396.91	4148.38	0.648733	-0.624304	1.47052e-05	0.000131923
	AIMP2	4442.3	2871.48	0.648819	-0.624113	2.71239e-05	0.000228547
	ARRB2	2379.38	1542.5	0.649097	-0.623494	0.000325591	0.00203788
	CISD3	2366.53	1509.21	0.649211	-0.623241	0.000102727	0.000739786
	GPATCH4	6108.77	3952.01	0.649307	-0.623028	1.23132e-05	0.000112002
	FHOD1	2194.48	1405.87	0.649517	-0.622561	0.000118642	0.00084159
	OSGEP	1547.62	987.26	0.649552	-0.622483	0.000335432	0.00208805
	HSPA1B	2240.55	1435.88	0.649807	-0.621916	0.000141543	0.000980726
	MRPL15	4601.25	2986.63	0.650378	-0.62065	3.93775e-05	0.000318688
	RPL13	84124.8	53402.9	0.650445	-0.620501	7.19468e-06	6.94474e-05
	ILF3-AS1	4429.99	2820.28	0.650448	-0.620495	0.000297985	0.00188747
	WDR74	6340.57	4041.81	0.650708	-0.619918	1.46543e-05	0.000131554
	DCAF13	6383.41	4161.79	0.650891	-0.619512	2.5416e-05	0.000216146
	B4GALNT1	1070.11	679.747	0.651469	-0.618232	0.00118726	0.0062823
	CETN3	925.126	583.478	0.651582	-0.617982	0.00214831	0.0104001
	SLC25A40	434.296	270.547	0.65188	-0.617321	0.0132568	0.0477092
	TTLL12	6557.24	4106.08	0.65212	-0.61679	4.7501e-05	0.000376009
	COPS3	3124.27	2008.12	0.652597	-0.615737	5.9235e-05	0.000459097
	NDUFAF4	1066.35	698.725	0.652713	-0.615479	0.00215009	0.0104026
	ELP5	3155.97	2025.43	0.652901	-0.615063	0.0002885	0.00183416
	RPL8	169055	107992	0.652945	-0.614966	6.01857e-06	5.89236e-05
	RFC1	1433.4	923.704	0.652975	-0.614899	0.00127273	0.00668048
	RPL39L	2540.27	1619.58	0.653013	-0.614817	0.000566846	0.00332217
	SLC27A2	608.498	391.795	0.653244	-0.614306	0.00762529	0.0303113
	GCDH	1254.32	797.926	0.653261	-0.614269	0.000850745	0.00472193
	MRPS34	30733.8	19785.4	0.653464	-0.613821	3.71175e-06	3.78229e-05
	SLC25A22	1892.63	1190.94	0.653472	-0.613802	0.000405268	0.00247341
	REEP6	4481.11	2888.73	0.653649	-0.613411	3.08136e-05	0.000256022
	IARS2	3033.15	1959.37	0.65398	-0.612682	6.59062e-05	0.000503972
	DNAJC12	674.461	410.562	0.654566	-0.611388	0.00919582	0.0352182
	TCFL5	945.894	616.245	0.654657	-0.61119	0.0023232	0.0110993
	DCDC2	655.687	416.48	0.654751	-0.610981	0.00694651	0.0281218
	DCPS	2038.36	1315.34	0.654877	-0.610705	0.000197777	0.00130828
	NPY1R	2134.84	1384.34	0.655215	-0.609959	0.000192554	0.00128114
	MAGOH	2653.86	1721.76	0.655856	-0.608549	0.000116728	0.00083016
	SYNCRIP	8435.93	5489.83	0.655906	-0.608439	1.09121e-05	0.000100523
	PDHA1	6155.23	4004.28	0.656043	-0.608138	1.79246e-05	0.000157613
	ALG3	5371.68	3425.62	0.656465	-0.60721	7.06368e-05	0.000533312
	MVK	3132.05	2032.72	0.656607	-0.606898	7.1043e-05	0.000535887
	KCNH2	838.105	551.354	0.65673	-0.606628	0.00455076	0.0197171
	DNAJC10	1892.21	1202.09	0.656872	-0.606316	0.00206543	0.0100675
	USP5	4665.68	3026.09	0.656936	-0.606175	3.07931e-05	0.000256006
	RPL29	21067.5	13356.5	0.65714	-0.605726	1.53902e-05	0.000137262
	ALMS1	640.62	410.679	0.657146	-0.605714	0.00557097	0.0232706
	SLC19A2	676.983	430.358	0.657323	-0.605325	0.00936762	0.0357611
	NDUFC2	5703.18	3851.85	0.657358	-0.605248	0.00227156	0.0108981
	RPS27A	11260.9	7323.87	0.657384	-0.605191	8.41844e-06	7.97158e-05
	SERPINH1	11288.8	7002.2	0.657749	-0.604392	0.000104182	0.000749084
	NOL9	1199.06	786.298	0.657899	-0.604062	0.00128406	0.00672451
	MYEF2	829.778	534.134	0.657951	-0.603947	0.00283539	0.0131749
	DDX24	6617.3	4312.24	0.657989	-0.603865	1.77518e-05	0.000156393
	LRSAM1	1140.14	737.307	0.657993	-0.603857	0.0013551	0.00703483
	KDM1A	5464.52	3560.03	0.6586	-0.602526	6.90834e-05	0.00052331
	CCT2	12223.2	7961.37	0.658699	-0.602308	9.08608e-06	8.57151e-05
	IMP4	11936.8	7768.02	0.65889	-0.601891	9.20259e-06	8.65762e-05
	MTR	500.508	321.375	0.658968	-0.601719	0.01099	0.0408472
	TUBGCP4	927.382	597.66	0.65897	-0.601716	0.00225785	0.0108475
	UCKL1	2762.72	1778.26	0.65925	-0.601102	0.000333402	0.00207729
	GGCT	6094.07	3950.76	0.65954	-0.600467	3.62469e-05	0.000296322
	DDX28	1290.13	837.528	0.659594	-0.600351	0.000878474	0.00484449
	PTBP1	15068	9728.5	0.659647	-0.600234	1.47655e-05	0.000132292
	UPF3B	3089.24	1974.1	0.659914	-0.599651	0.000163197	0.00110456
	GTF2H4	2003.81	1300.16	0.66012	-0.5992	0.000327297	0.00204668
	NEIL2	1047.37	679.755	0.660416	-0.598553	0.00170425	0.00856244
	NAGA	1456.51	948.332	0.660557	-0.598244	0.000653029	0.00374884
	PFDN6	4371.74	2870.43	0.660806	-0.597702	0.00015525	0.00106071
	TTC38	717.241	461.157	0.661039	-0.597193	0.00475217	0.0204413
	RBBP8	1716.05	1121.88	0.661279	-0.596669	0.00059617	0.00347032
	TP53	11323.5	7526.39	0.661458	-0.596279	1.84062e-05	0.000160714
	GNL3	3168.46	2074.34	0.662022	-0.595049	9.41472e-05	0.00068701
	PNN	2668.74	1717.33	0.66224	-0.594573	0.000337526	0.00210013
	RPL32	67924.8	43983.5	0.66249	-0.594029	1.47182e-05	0.000131954
	MRPS35	3547.34	2343.29	0.662628	-0.59373	0.000123874	0.00087464
	WBSCR22	15957.8	10488.2	0.662814	-0.593323	9.2006e-06	8.65762e-05
	RCN2	3466.94	2231.89	0.662831	-0.593288	0.000242413	0.00157322
	EIF2B5	4394.5	2877.42	0.662848	-0.593249	5.51767e-05	0.000429097
	PCK2	2823.94	1874.36	0.662872	-0.593197	0.000265111	0.00170601
	WDR18	4664.87	3025.38	0.662945	-0.593039	7.64132e-05	0.000569407
	ANXA6	1148.4	743.104	0.663056	-0.592798	0.00174609	0.00873743
	USP37	505.636	323.703	0.663077	-0.592752	0.0120576	0.0441813
	KIF1A	756.719	496.546	0.663399	-0.592051	0.00928288	0.0354823
	PIK3R4	665.055	434.806	0.663566	-0.591687	0.00744879	0.0297822
	OGG1	1902.78	1245.76	0.663614	-0.591583	0.000360754	0.00222849
	CSPP1	960.374	618.002	0.663637	-0.591535	0.00261946	0.0122754
	POLE3	7034.84	4590.17	0.663846	-0.59108	0.000183758	0.00122798
	COMMD4	7925.32	5242.13	0.666107	-0.586174	2.40525e-05	0.000205569
	CCT6A	7904.88	5196.09	0.666282	-0.585795	2.66896e-05	0.000225441
	KRI1	3184.8	2099.5	0.666424	-0.585487	0.000119249	0.000844153
	GEMIN6	1694.6	1115.81	0.66661	-0.585086	0.000678673	0.0038766
	NOP14	3322.26	2180.96	0.666841	-0.584586	0.000143093	0.000990463
	INTS4	705.927	460.446	0.666858	-0.584549	0.00610516	0.025165
	CHDH	640.847	407.044	0.666928	-0.584396	0.00922692	0.0353077
	ZNF326	634.014	410.983	0.667064	-0.584103	0.00786489	0.0310848
	TCHP	1201.42	789.141	0.667526	-0.583104	0.00147652	0.00758767
	TSFM	3555.03	2359	0.667667	-0.582799	0.00012928	0.000906278
	CEP57	785.613	513.205	0.667888	-0.582322	0.00455249	0.0197184
	AIF1L	10619.5	7018.77	0.667976	-0.582133	3.97362e-05	0.000320835
	PPCDC	2701.64	1758.94	0.66848	-0.581044	0.000385832	0.00236531
	TMEM109	6776.26	4406.74	0.668646	-0.580685	6.87289e-05	0.000521201
	HOXC9	1200.98	787.699	0.668771	-0.580417	0.00271312	0.0126711
	HAUS2	785.683	514.464	0.668896	-0.580145	0.0046661	0.0201089
	TRAPPC4	3796.15	2537.34	0.669252	-0.579379	0.000125371	0.000882939
	SNHG17	1230.1	818.229	0.669332	-0.579206	0.00351893	0.0158363
	PMM1	2400.04	1591.2	0.669512	-0.578817	0.000280256	0.00178921
	AHCTF1	642.561	422.867	0.669667	-0.578485	0.0080916	0.0318148
	RUSC1	6848.14	4565.56	0.669728	-0.578353	5.8642e-05	0.000455272
	C16orf80	1947.14	1295.26	0.669906	-0.577969	0.000612901	0.00355115
	ANAPC7	3573.97	2337.33	0.670056	-0.577647	0.000161115	0.00109424
	TIMM23	4556.84	3033.17	0.670578	-0.576523	7.57092e-05	0.000564824
	RPS20	13824.7	9186.99	0.670608	-0.576458	1.8753e-05	0.000163535
	SMG9	2119.06	1352.64	0.670934	-0.575758	0.00123089	0.00649816
	HSD3B7	2273.34	1512.92	0.671008	-0.575599	0.000369344	0.00227541
	SLC25A11	7467.7	4985.21	0.671082	-0.575438	4.09653e-05	0.000329982
	SMARCA5	2327.67	1519.83	0.671188	-0.575211	0.000410725	0.00250005
	HMGN2	3916.42	2609.44	0.671279	-0.575016	0.000107132	0.000768685
	MRPL35	2698.29	1800.37	0.67186	-0.573767	0.000400692	0.00244657
	FZD4	565.641	369.555	0.672151	-0.573142	0.011279	0.0417516
	BRAT1	3243.15	2154.66	0.672239	-0.572954	0.000159036	0.00108388
	MRPL12	17590.9	11630.5	0.672297	-0.57283	2.63229e-05	0.000222892
	RPP30	1519.94	1022.35	0.672779	-0.571796	0.0012815	0.00671367
	HSP90B1	10681.6	7126.96	0.672925	-0.571482	2.68743e-05	0.000226861
	PPRC1	2348.28	1564.08	0.672989	-0.571345	0.000359663	0.00222275
	SMYD4	668.989	441.942	0.673026	-0.571266	0.00846809	0.0329458
	PNP	7633.98	5070.26	0.673067	-0.571177	4.21734e-05	0.000338521
	RPS19BP1	8138.1	5426.34	0.673069	-0.571175	3.64982e-05	0.000298022
	SRSF10	3531.38	2367.11	0.673147	-0.571008	0.000362385	0.00223555
	AHRR	543.144	354.928	0.67317	-0.570957	0.0129437	0.0468156
	EWSR1	10386.5	6886.53	0.673195	-0.570905	4.27296e-05	0.000342386
	GLOD4	3045.85	2033.48	0.673421	-0.57042	0.000216868	0.00141884
	SLC27A5	757.114	510.691	0.673482	-0.570288	0.00929518	0.0355194
	XRCC6	15152.8	10060.8	0.673592	-0.570054	2.50748e-05	0.000213509
	NUFIP1	995.209	666.212	0.673702	-0.569817	0.00490095	0.020964
	DDX20	676.742	445.321	0.6739	-0.569394	0.00780092	0.0308664
	RTKN	1215.93	805.2	0.673947	-0.569292	0.00247002	0.011703
	RAD1	1613.54	1071.35	0.673981	-0.569221	0.00094764	0.00517601
	GEMIN2	975.147	647.386	0.674064	-0.569043	0.00351707	0.0158331
	MRPS12	9598.12	6413.34	0.674208	-0.568734	3.28869e-05	0.000269979
	CHD1	626.082	413.733	0.674369	-0.56839	0.00964396	0.0366583
	KIAA1467	843.526	541.917	0.674446	-0.568226	0.00813376	0.0319256
	CTU2	3930.83	2619.39	0.674724	-0.567631	0.000126489	0.000889896
	TSEN34	7713.35	5160.56	0.67478	-0.56751	6.37496e-05	0.000489662
	CDK10	2671.14	1778.69	0.674952	-0.567142	0.000307736	0.0019385
	HSP90AB1	37600.5	25187.7	0.675045	-0.566945	5.13556e-05	0.000402114
	TRIT1	885.848	585.317	0.675053	-0.566926	0.00461269	0.0199163
	SQLE	4900.88	3331.94	0.675523	-0.565924	0.00162696	0.00825569
	SFPQ	5844.97	3914.26	0.675827	-0.565273	7.52042e-05	0.000562536
	TFAM	2152.05	1435.83	0.676135	-0.564617	0.00055706	0.00327321
	WDR46	6278.39	4157.79	0.676352	-0.564154	9.76311e-05	0.00070829
	LAP3	2527.33	1696.37	0.676406	-0.564038	0.00125296	0.0065944
	TIMM21	1420.77	930.741	0.676843	-0.563107	0.00260492	0.0122365
	NUP43	897.497	590.118	0.676864	-0.563063	0.00474874	0.020433
	PAQR4	8257.08	5602.84	0.676931	-0.562919	7.00203e-05	0.000529531
	CDC123	6674.92	4477.51	0.677178	-0.562392	6.47549e-05	0.000496653
	EDC4	1947.8	1316.63	0.677248	-0.562245	0.00109961	0.0058916
	TUBG1	7158.73	4765.2	0.677254	-0.562231	0.000112692	0.000804792
	GDAP1	1055.17	702.508	0.677345	-0.562037	0.00318423	0.0145253
	MRPS27	2387.56	1592.4	0.677464	-0.561784	0.000595461	0.00346767
	IQCB1	703.049	453.405	0.677693	-0.561296	0.0102088	0.0384433
	GPR160	831.05	536.015	0.677822	-0.561023	0.00656691	0.0268186
	DLAT	1717.13	1144.16	0.678265	-0.560079	0.00139411	0.00721553
	UTP6	970.644	648.376	0.678339	-0.559921	0.00381231	0.0169345
	EML4	1259.55	842.622	0.678486	-0.559609	0.00202785	0.00991956
	HMGB3	12342.4	8328.33	0.678886	-0.558759	3.73667e-05	0.000304209
	EIF4A3	7441.77	5002.75	0.678961	-0.558599	6.01047e-05	0.000464525
	FGFRL1	3859.33	2592.17	0.679082	-0.558342	0.000185017	0.00123579
	PINX1	1149.11	770.495	0.679112	-0.558278	0.00258715	0.0121656
	SNRNP200	5661.45	3875.39	0.679122	-0.558258	0.000121995	0.000862699
	PEX3	642.278	427.628	0.679295	-0.557889	0.0121058	0.0443287
	UBTF	8053.94	5352.22	0.679359	-0.557754	0.000108868	0.000780731
	PPWD1	810.269	536.908	0.679363	-0.557746	0.00769821	0.0305304
	CCT3	29178.6	19477.8	0.679537	-0.557377	6.71794e-05	0.000511712
	PTPN18	3485.02	2322.31	0.679638	-0.557162	0.000329731	0.00205909
	SLC39A6	7039.85	4708.07	0.679649	-0.557138	9.34884e-05	0.000683055
	ALG8	1729.77	1168.89	0.679664	-0.557107	0.00148138	0.0076041
	EIF4E	887.902	586.733	0.679775	-0.556871	0.00841839	0.0328176
	CHORDC1	888.989	598.849	0.679793	-0.556833	0.00590755	0.0244828
	EPCAM	12831.8	8666.73	0.679817	-0.556783	3.85804e-05	0.000313161
	ACP2	2605.87	1717.75	0.679917	-0.55657	0.000734431	0.00416218
	C12orf57	4405.66	2982.69	0.679988	-0.556418	0.000162001	0.00109917
	CHCHD6	2307.67	1551.32	0.680227	-0.555911	0.000520346	0.00308255
	U2AF1	17421	11728.2	0.68035	-0.555651	3.19788e-05	0.000264104
	ATP6V0A2	732.042	488.856	0.680397	-0.555551	0.00792588	0.0313157
	RRP15	3212.89	2178.99	0.680556	-0.555215	0.000278732	0.0017803
	ARL6IP1	8463.6	5705.51	0.680694	-0.554921	5.89804e-05	0.000457381
	WDR5	8396.69	5656.03	0.680971	-0.554335	6.20936e-05	0.000478281
	VDAC2	2768.21	1880.66	0.681174	-0.553905	0.000680384	0.00388153
	ERLIN1	1306.23	878.221	0.681223	-0.5538	0.0020297	0.00992505
	NPM1	29284.3	19701.7	0.681283	-0.553675	2.73783e-05	0.000230125
	PIH1D1	6295.91	4239.55	0.681708	-0.552775	0.000152108	0.00104444
	SENP3	1642.78	1097.41	0.681906	-0.552354	0.0012631	0.00663248
	SHPK	2492.8	1658.43	0.682025	-0.552104	0.000632645	0.00364248
	NOM1	1268.41	854.638	0.682162	-0.551814	0.00239312	0.0113858
	TSN	4210.33	2851.43	0.68226	-0.551607	0.000340585	0.00211628
	SNRPD3	14106.6	9684.25	0.682419	-0.55127	0.000151845	0.00104316
	C10orf35	1031.44	687.152	0.682633	-0.550817	0.00532257	0.022431
	ECI2	1304.28	865.67	0.682898	-0.550259	0.00307937	0.014108
	TCEB3	2278.02	1539.97	0.68357	-0.54884	0.000608918	0.00353138
	TBL1X	3767.74	2544.14	0.683901	-0.54814	0.000798767	0.0044714
	IGSF8	1705.87	1140.02	0.684	-0.547932	0.00141749	0.00731994
	SNX5	5208.27	3516.25	0.684196	-0.547518	0.000373374	0.00229714
	MAP1S	1088.47	715.645	0.684494	-0.546891	0.00688037	0.027916
	IRX4	635.958	426.24	0.684555	-0.546761	0.0121547	0.0444776
	EFTUD2	4085.08	2761.43	0.684809	-0.546226	0.000668483	0.00382795
	MIR600HG	680.098	468.179	0.684834	-0.546174	0.0140103	0.0499625
	C21orf59	5549.33	3772.6	0.685207	-0.545389	0.000138301	0.000963615
	ANP32A	11878.3	8034.91	0.685257	-0.545282	9.29186e-05	0.000679851
	PFKM	1212	828.529	0.685539	-0.544689	0.00371729	0.0166092
	AAMP	15641.2	10633.1	0.685895	-0.543941	4.86322e-05	0.000383195
	LOC341056	718.65	478.847	0.686213	-0.543271	0.0112568	0.0416807
	ARMC6	4364.45	2998.32	0.686226	-0.543244	0.000252547	0.00163358
	FGFR1	1358.59	922.123	0.686232	-0.543231	0.00235612	0.0112375
	RPS13	19825.8	13027.7	0.686291	-0.543107	0.000386175	0.00236635
	AFG3L2	3913.76	2626.29	0.686645	-0.542363	0.000477638	0.00285791
	ZC3H18	5632.85	3816.88	0.686999	-0.541621	0.000163347	0.00110502
	PCYOX1L	714.458	479.429	0.687065	-0.541482	0.0100364	0.0379086
	WDR92	1136.47	774.967	0.687517	-0.540533	0.00376237	0.016767
	GTPBP4	5856.24	3991.68	0.68786	-0.539813	0.000141123	0.000978806
	VPS35	4227.3	2827.33	0.688169	-0.539165	0.00182348	0.00906193
	FAM155B	883.001	605.658	0.6882	-0.539101	0.00925802	0.035407
	PRPF38B	4733.01	3229.04	0.688214	-0.53907	0.000196744	0.00130457
	FAM86A	1725.4	1177.95	0.68829	-0.538911	0.00153338	0.00783588
	ENO2	765.423	518.781	0.689074	-0.537269	0.0123936	0.0452192
	MRPL18	3673.56	2504.37	0.689488	-0.536403	0.00122779	0.00648428
	EXOSC10	1882.36	1279.96	0.689674	-0.536013	0.00132203	0.00690702
	SERPINB6	3347.09	2276.69	0.689708	-0.535943	0.000399355	0.00244044
	GSTO1	3766.57	2591	0.690083	-0.535159	0.000397573	0.00243186
	ATP13A1	2740.78	1868.29	0.690274	-0.534758	0.000853335	0.00473439
	TSPAN3	4289.62	2940.49	0.690556	-0.53417	0.00056884	0.00332818
	TACC1	1262.12	864.916	0.690599	-0.53408	0.00319791	0.0145829
	LEO1	4605.73	3160.69	0.690647	-0.533979	0.000345885	0.00214727
	HMCES	8878.49	6068.1	0.690717	-0.533833	0.000111767	0.000799851
	AARS	8296.18	5819.19	0.690789	-0.533683	0.000361745	0.0022326
	USP39	5753.8	3945.35	0.690948	-0.53335	0.00060855	0.00353138
	ACLY	4091.66	2792.58	0.691102	-0.53303	0.000304734	0.00192135
	DDX42	5441.69	3731.45	0.691411	-0.532385	0.000192749	0.00128182
	SLC45A4	827.99	561.095	0.691541	-0.532113	0.00944743	0.036021
	CDH24	1728.59	1211.8	0.691999	-0.531157	0.00389197	0.0172364
	ORC5	1179	802.628	0.692126	-0.530893	0.0038222	0.016962
	ARMC9	900.566	611.382	0.692155	-0.530833	0.006974	0.0282042
	CEBPZ	1802.44	1249.93	0.692421	-0.530278	0.00231722	0.0110784
	DIMT1	1460	1006.26	0.692685	-0.529729	0.00290637	0.0134365
	NUMA1	5849.48	4060.17	0.692692	-0.529715	0.000317883	0.001996
	EIF5A	42074.1	28182.3	0.692776	-0.529539	0.00020323	0.00133983
	UBA2	4287.06	2942.93	0.693267	-0.528518	0.000303697	0.00191657
	PHGDH	6274.01	4360.44	0.693423	-0.528192	0.000716823	0.0040708
	PECR	717.77	486.46	0.693434	-0.52817	0.0121386	0.0444307
	PRRC2A	24029.3	16463.2	0.693544	-0.527941	0.000162924	0.00110335
	TCP1	8323.87	5713.11	0.693719	-0.527576	0.000248588	0.00161025
	KDELR3	1559.28	1074.98	0.693786	-0.527438	0.00992263	0.0375615
	AGPAT5	1129.71	772.2	0.693866	-0.527271	0.00449724	0.0195284
	PPA1	5679.56	3910.87	0.693918	-0.527162	0.00039788	0.00243265
	GLRX5	10126.1	6925.63	0.694616	-0.525712	0.000275507	0.00176217
	DIAPH1	5535.36	3792.49	0.694914	-0.525093	0.000282008	0.00179872
	TMX2	3017.45	2067.8	0.695099	-0.52471	0.000621918	0.00359429
	P2RX4	1608.39	1097.37	0.695118	-0.52467	0.00282009	0.0131171
	NKRF	1172.24	802.621	0.695207	-0.524486	0.0043116	0.0188137
	DPH1	913.801	622.343	0.6953	-0.524292	0.00750745	0.029973
	SCO1	2244.44	1548.25	0.695471	-0.523937	0.00113104	0.00603903
	NANS	7811.41	5402.75	0.695569	-0.523734	0.000161573	0.00109681
	ITPK1	7541.49	5018.3	0.696018	-0.522803	0.00192206	0.0094866
	POLR1A	1110.07	765.756	0.696134	-0.522562	0.0060537	0.0249979
	HNRNPA1	1675.31	1150.07	0.6962	-0.522426	0.00213893	0.0103632
	CLASRP	1900.7	1304.31	0.696307	-0.522204	0.00176318	0.0088101
	LONP1	5600.33	3854.56	0.696525	-0.521753	0.000470007	0.00282093
	BAZ1B	3411.6	2350.16	0.696546	-0.521709	0.00182658	0.00907405
	EML3	3482.62	2409.67	0.696564	-0.521673	0.000862159	0.00477369
	GPN3	1056.56	722.239	0.696661	-0.52147	0.00723745	0.0290642
	ALKBH2	1916.92	1318.63	0.69674	-0.521308	0.00157912	0.00803074
	RPL7A	55680.2	37804	0.69718	-0.520397	0.00107984	0.00581249
	CDK5RAP1	1414.66	970.898	0.697294	-0.52016	0.00407763	0.017916
	WDR3	1032.06	708.141	0.697345	-0.520055	0.00750456	0.0299702
	ZDHHC6	1819.03	1238.7	0.697356	-0.520033	0.00219466	0.0105846
	SHQ1	998.657	696.197	0.697592	-0.519545	0.00893704	0.0343902
	PHLDB1	1920.07	1329.99	0.697651	-0.519422	0.00334412	0.015159
	YRDC	1495.52	1023.23	0.698392	-0.51789	0.00338733	0.0153245
	DYNC1LI1	2685.4	1879.18	0.698443	-0.517786	0.00116345	0.00617778
	STT3A	2374.77	1645.31	0.698589	-0.517483	0.00116726	0.00619318
	MARS	7644.93	5315.32	0.698953	-0.516732	0.000211161	0.00138613
	AAAS	2997.92	2044.82	0.699174	-0.516276	0.00127415	0.00668541
	C16orf91	2889.89	1990.18	0.699201	-0.51622	0.00115046	0.00612778
	EBNA1BP2	13895.4	9646.99	0.699571	-0.515458	0.000124511	0.000878229
	HSPA14	2769.47	1917.5	0.69973	-0.51513	0.000875722	0.00483514
	CCDC86	7493.68	4997.03	0.69986	-0.514861	0.000719147	0.0040823
	WDR75	1118.06	770.393	0.699888	-0.514804	0.00555355	0.023219
	DDX56	5748.11	3955.49	0.699978	-0.514618	0.000321699	0.00201443
	MRPS6	2950.15	2055.95	0.699987	-0.5146	0.00142414	0.00734325
	SRSF4	3049.61	2120.34	0.700203	-0.514156	0.00114745	0.00611645
	TUT1	1290.32	890.558	0.700321	-0.513912	0.00418616	0.0183342
	TMEM237	853.591	585.482	0.700453	-0.51364	0.0101085	0.0381389
	RPL31	27672.2	19294.3	0.700595	-0.513347	0.000160885	0.00109322
	EEF1B2	13077.1	9120.63	0.700859	-0.512804	0.000302305	0.00191042
	FOXRED1	1931	1303.07	0.701517	-0.51145	0.00596826	0.0247046
	TARS2	3061.37	2119.5	0.701635	-0.511207	0.000989777	0.00538687
	POLR2B	1952.72	1340.75	0.701859	-0.510747	0.00248823	0.0117649
	TMEM258	7319.38	5021.09	0.701895	-0.510673	0.00102485	0.00554886
	DUS3L	2330.88	1563.75	0.702038	-0.51038	0.00381481	0.0169402
	PUF60	16341.9	11289.5	0.702071	-0.51031	0.000268475	0.00172361
	HMGN3	2101.08	1376.61	0.702191	-0.510065	0.00729211	0.0292409
	NCAPD2	3579.18	2513.48	0.702545	-0.509337	0.00121533	0.00642587
	MAPK12	1198.2	828.951	0.70259	-0.509244	0.0053639	0.0225636
	PRELID1	16092.3	11060.9	0.702645	-0.509132	0.000564567	0.00331306
	NDUFB10	27533.2	19181	0.702738	-0.508942	0.000132605	0.000927694
	FARSA	11758.4	8215.9	0.702769	-0.508877	0.000171124	0.00115366
	PQBP1	7807.38	5382.64	0.702859	-0.508693	0.00028976	0.001841
	ADSL	5943.63	4131.61	0.702866	-0.508679	0.000361583	0.0022326
	NXF1	2319.85	1602.44	0.703003	-0.508398	0.00164086	0.00831086
	PAGR1	10235.2	7156.19	0.703044	-0.508312	0.000269155	0.00172556
	BAHCC1	855.23	590.912	0.703075	-0.508249	0.0122482	0.0447838
	HNRNPM	8103.51	5627.86	0.70317	-0.508055	0.00025827	0.00166746
	NUP98	1348.29	938.94	0.703679	-0.507011	0.0054046	0.0227278
	MBNL1	1670.87	1166.83	0.703795	-0.506773	0.00286585	0.0132914
	XPO1	3053.77	2118.4	0.704321	-0.505695	0.00107219	0.00577585
	MRPL24	7422.9	5170.98	0.704417	-0.505498	0.000289844	0.001841
	CKS2	3720.68	2559.91	0.704568	-0.505189	0.00288074	0.0133359
	RPS3	101122	69577.6	0.704809	-0.504696	0.00127603	0.00669013
	FIP1L1	2403.6	1679.05	0.704831	-0.50465	0.00149739	0.00767193
	LTV1	1777.25	1243.96	0.704956	-0.504395	0.00349983	0.0157659
	PPP2R1B	924.933	644.352	0.705204	-0.503888	0.0103662	0.0389612
	TOMM6	6394.38	4466.32	0.705266	-0.50376	0.000348219	0.00215981
	U2AF2	27816	19049.4	0.705377	-0.503533	0.00033989	0.00211372
	TBCE	1310.21	917.471	0.705743	-0.502785	0.00737945	0.0295393
	STIP1	18341.3	12784.3	0.705843	-0.50258	0.000207673	0.00136585
	BNIP1	1152.29	801.556	0.705971	-0.50232	0.00636021	0.0260909
	SRSF3	16919	11950.5	0.705981	-0.502299	0.000318214	0.00199717
	ADSS	1337.4	927.085	0.706283	-0.501682	0.00531058	0.022401
	RPL28	45189	30709.8	0.706649	-0.500934	0.00171933	0.00862243
	RBMX	6526.01	4474.08	0.70669	-0.50085	0.00210317	0.0102224
	NME3	4797.02	3340.67	0.706692	-0.500847	0.000743353	0.00420091
	ARHGAP39	1680.83	1181.48	0.706928	-0.500365	0.00410155	0.0179981
	C1GALT1C1	1061.05	740.609	0.707091	-0.500032	0.00813017	0.0319207
	HSPA1A	2727.52	1907.79	0.707229	-0.499751	0.00127513	0.00668797
	SNRPF	8354.02	5845.19	0.707511	-0.499176	0.000877045	0.00483855
	CLEC11A	1296.2	899.5	0.707519	-0.49916	0.00608094	0.0250802
	NKAIN1	1127.55	786.776	0.707603	-0.498988	0.00701227	0.0283256
	ASXL1	1560.34	1094.58	0.707824	-0.498537	0.00404508	0.0178072
	MRPL19	3840.63	2700.46	0.707879	-0.498425	0.0013254	0.00691991
	TMA16	2383.45	1673.16	0.707908	-0.498365	0.00178174	0.00888345
	NUDT1	7366.78	5158.9	0.707951	-0.498279	0.000354298	0.00219256
	DERA	903.678	630.134	0.70913	-0.495878	0.0113522	0.0419774
	C1orf56	1020.66	710.427	0.709142	-0.495853	0.00916488	0.0351193
	ASUN	1122.11	786.763	0.709172	-0.495793	0.00758076	0.0301955
	FLJ22184	2572.32	1804.65	0.709191	-0.495754	0.00242405	0.011509
	GANAB	8641.87	6157.94	0.709242	-0.495651	0.00108738	0.00584394
	ENOSF1	1160.97	811.811	0.709278	-0.495577	0.00697004	0.0281965
	CCT8	3595.34	2526.88	0.709279	-0.495576	0.000907021	0.00498789
	PTGES3	15929.1	11283.1	0.709378	-0.495374	0.000630957	0.0036354
	CLPP	5606.78	3930.51	0.70942	-0.495288	0.000738571	0.00417874
	PSMC3	19180.1	13464.7	0.709564	-0.494995	0.000196884	0.00130457
	TSEN54	10747.2	7548.97	0.709654	-0.494813	0.000292465	0.00185679
	CTXN1	6992.3	4948.85	0.709802	-0.494511	0.000668207	0.00382795
	GIGYF1	2125.18	1493.01	0.710002	-0.494104	0.00235622	0.0112375
	SLC25A4	992.008	705.491	0.710429	-0.493239	0.0131069	0.0472936
	CYCS	6343.3	4543.72	0.710987	-0.492104	0.00222521	0.0107132
	MRPL37	7705.44	5401.46	0.711264	-0.491544	0.000492989	0.0029407
	SEH1L	2072.5	1466.92	0.711291	-0.491488	0.00270847	0.0126536
	NIF3L1	1412.45	992.129	0.711442	-0.491182	0.00529276	0.0223533
	ENOPH1	2531.17	1770.01	0.711444	-0.491177	0.00221303	0.0106599
	HNRNPH3	7446.75	5255.97	0.71145	-0.491166	0.000408506	0.00248765
	SEPHS1	8240.68	5815.27	0.711459	-0.491147	0.000376468	0.00231203
	KCTD3	3030.33	2135.47	0.71174	-0.490578	0.00130917	0.00685079
	PPP1R16A	4637.2	3256.31	0.71185	-0.490356	0.00180894	0.0089977
	CS	6558.78	4513.54	0.712061	-0.489926	0.00213581	0.0103517
	MRPS18B	9730.98	6884.68	0.712069	-0.489911	0.000340018	0.00211372
	CHERP	2359.72	1664.01	0.712717	-0.488598	0.00244399	0.0115997
	LRRC42	2008.13	1416.36	0.713082	-0.48786	0.00279637	0.01302
	SLC1A5	13849.7	9802.38	0.713143	-0.487737	0.000286396	0.00182163
	TEX264	3677.97	2605.02	0.713371	-0.487275	0.00109062	0.0058522
	RBM25	4579.08	3194.58	0.713803	-0.486403	0.00137709	0.0071355
	CHD4	8496.05	6071.39	0.713943	-0.486118	0.00063115	0.0036354
	WBP11	4352.35	3082.76	0.714079	-0.485844	0.000866418	0.00479024
	NPRL2	940.994	662.523	0.714239	-0.485521	0.0123817	0.0451877
	DANCR	3881.26	2754.08	0.714346	-0.485306	0.00111779	0.00597693
	AASDHPPT	1107.73	772.709	0.714443	-0.48511	0.0101646	0.0383188
	RDH11	5103.91	3625.14	0.714518	-0.484958	0.00138026	0.00714653
	PPP5C	5533.33	3854.5	0.714976	-0.484032	0.00193617	0.00954935
	TBRG4	4454.48	3118.92	0.715003	-0.483978	0.00108847	0.00584747
	CCDC34	4183.46	2844.88	0.715322	-0.483336	0.00260799	0.0122426
	DCP1A	1277.14	901.999	0.715794	-0.482384	0.0071473	0.0287779
	C11orf84	4333.15	3082.71	0.715855	-0.48226	0.00205742	0.0100356
	SNRPA	7317.61	5111.08	0.715867	-0.482237	0.00158719	0.0080658
	MLH1	1438.52	1035.49	0.716113	-0.481741	0.0126584	0.0459553
	RPS9	40531.1	28618.6	0.716273	-0.481419	0.00035088	0.00217435
	NDUFV2	3027.27	2203.08	0.716417	-0.481129	0.0103825	0.0389903
	SRSF6	5040.12	3589.36	0.71676	-0.480438	0.000827101	0.00460933
	PLXDC2	1267.11	897.831	0.71678	-0.480398	0.007563	0.030151
	SIN3A	3009.71	2137.96	0.716832	-0.480294	0.00168456	0.00848211
	RTN3	5786.37	4105.52	0.716839	-0.480279	0.000864588	0.00478522
	NUPL1	1406.11	996.38	0.716846	-0.480266	0.00642908	0.0263341
	RBM5	1766.31	1271.58	0.716871	-0.480214	0.00811482	0.0318773
	ITPR3	2962.13	2198.04	0.716912	-0.480132	0.00720403	0.0289696
	PAFAH1B3	10360.5	7281.83	0.717102	-0.47975	0.000671206	0.00383874
	GADD45GIP1	14541	10265.3	0.717148	-0.479656	0.000406722	0.00247898
	POP7	9052.86	6460.94	0.717172	-0.479609	0.000536048	0.00316465
	C9orf114	7754.85	5460.8	0.717341	-0.47927	0.000735238	0.00416481
	IGSF1	2692.42	1929.23	0.717504	-0.478941	0.00230382	0.0110297
	PIGU	1597.2	1108.9	0.717563	-0.478823	0.00699197	0.0282686
	PHF5A	2991.17	2124.27	0.71768	-0.478587	0.00176658	0.00882067
	INTS10	1851.39	1315.62	0.717825	-0.478295	0.00390754	0.0172904
	BMP4	1296.77	921.087	0.718249	-0.477444	0.00852908	0.0331174
	ISOC1	6225.72	4418.38	0.718903	-0.476131	0.00090818	0.00499226
	JADE2	3609.58	2599.71	0.719085	-0.475767	0.00262532	0.0122987
	IBTK	1503.68	1046.27	0.719205	-0.475525	0.00773744	0.0306594
	RRP1	7731.95	5513.02	0.719356	-0.475223	0.000608064	0.00353058
	MAPK9	3466.81	2460.05	0.719442	-0.47505	0.00170168	0.00855575
	RPL23A	9529.49	6621.71	0.719506	-0.474921	0.0025162	0.0118848
	WDR34	39024.4	27589.1	0.719756	-0.474421	0.000675478	0.00385996
	DAZAP1	11795.8	8339.25	0.720005	-0.47392	0.00085834	0.00475639
	PPM1G	18937	13257.7	0.720454	-0.473023	0.00124852	0.00658109
	NUP62	8196.32	5815.67	0.720467	-0.472996	0.000670184	0.00383609
	CPSF3	2460.16	1748.83	0.720789	-0.47235	0.0028695	0.0133002
	CBX2	6889.88	4929.08	0.721465	-0.470999	0.000752879	0.00424221
	CDK2	4105.95	2926.17	0.721604	-0.470721	0.00358982	0.0161026
	FAM98B	1899.9	1364.87	0.72167	-0.470589	0.00690668	0.0279897
	HSPBP1	6296	4377.57	0.721885	-0.47016	0.00188462	0.00932527
	SMIM4	3383.32	2364.93	0.721943	-0.470044	0.00880661	0.0339836
	CBX1	10694.1	7668.75	0.722258	-0.469414	0.000559978	0.00328894
	CHCHD10	4771.36	3394.03	0.722445	-0.46904	0.0014575	0.00749555
	RQCD1	3728.43	2666.88	0.722511	-0.468909	0.00166933	0.00842086
	FDPS	11632	8403.77	0.722678	-0.468575	0.000694328	0.0039545
	RPL26	24720.5	17383.1	0.722686	-0.468559	0.00430834	0.0188092
	HEATR2	4248.99	3035.23	0.722688	-0.468555	0.00137605	0.00713282
	TFDP1	4118.33	2906.72	0.722729	-0.468474	0.00176105	0.00880468
	GRPEL1	4490.55	3220.8	0.722991	-0.467951	0.00178596	0.00889803
	STXBP1	1131.48	806.213	0.723125	-0.467684	0.0119524	0.0438777
	METTL17	1539.28	1099.48	0.723643	-0.46665	0.00756804	0.0301535
	EFHD1	2080.58	1480.01	0.723748	-0.466441	0.00509616	0.0216429
	NIFK	2702.52	2018.47	0.723828	-0.466281	0.00890409	0.0342826
	SUPV3L1	1216.05	862.034	0.723861	-0.466215	0.0119159	0.0438093
	DDX21	4654.83	3336.84	0.723877	-0.466183	0.00140934	0.0072806
	POLR2A	2205.6	1600.63	0.723908	-0.466121	0.00848324	0.0329933
	GFRA1	22044.8	15560.6	0.724668	-0.464607	0.00260484	0.0122365
	YWHAH	7135.35	5161.23	0.724939	-0.464069	0.00105303	0.00568378
	ZNF511	4166.78	3017.17	0.725858	-0.462242	0.00242133	0.0115001
	CMTR1	2057.03	1470.19	0.726357	-0.46125	0.00496735	0.0211877
	DNAJC11	4411	3171.68	0.726408	-0.461147	0.0015405	0.00786638
	TMEM161A	1821.96	1309.33	0.726794	-0.460381	0.0055661	0.0232615
	SLC25A10	13771.6	9643.94	0.726814	-0.460343	0.00323343	0.0147302
	SRGAP2	1677.81	1187.17	0.727505	-0.458971	0.0114384	0.0422393
	SAFB	2605.28	1889.75	0.727612	-0.458759	0.00801657	0.031574
	PAPD7	1427.08	1024.58	0.727659	-0.458666	0.0121075	0.0443287
	ESF1	2074.29	1483.58	0.727669	-0.458646	0.00492864	0.0210507
	EED	1770.77	1278.56	0.728072	-0.457847	0.00647533	0.0264919
	LIG1	2648.12	1912.28	0.72821	-0.457574	0.00330479	0.0150055
	ATG3	3972.31	2889.25	0.728258	-0.457478	0.0032679	0.0148675
	C1orf35	3984.6	2806.25	0.728647	-0.456708	0.00289598	0.013402
	DSG2	1657.14	1200.05	0.728912	-0.456183	0.00719535	0.0289459
	ALDH18A1	1823.9	1326.16	0.729026	-0.455957	0.00730885	0.0292995
	TLE2	1318.15	944.621	0.72915	-0.455712	0.0107679	0.0401522
	APEH	6911.07	5002.67	0.729159	-0.455695	0.00123718	0.00652632
	SF3B4	15186.8	10755.2	0.729326	-0.455364	0.00155513	0.00792636
	TUFM	41238.8	29764.9	0.729464	-0.455091	0.000610676	0.00353975
	SIGIRR	3566.44	2538.3	0.72963	-0.454763	0.0046333	0.0199989
	PLEKHO1	6231.47	4487.39	0.729764	-0.454499	0.00340874	0.015398
	GTF3C1	3397.84	2498.13	0.730016	-0.454001	0.00375534	0.0167629
	EIF4G1	24574.8	17851.3	0.730064	-0.453905	0.000605156	0.00351816
	RPL37A	55758.5	39606.9	0.730106	-0.453823	0.00329688	0.0149795
	CEP41	1376.86	1000.01	0.73015	-0.453736	0.0110227	0.0409354
	SART1	10511	7562.25	0.730363	-0.453315	0.00136752	0.00709395
	RPS6	67592.9	48021.6	0.730432	-0.453179	0.00304601	0.0139913
	NAT14	2740	1980.05	0.730777	-0.452498	0.00458605	0.0198262
	CCAR2	3481.65	2522.09	0.731047	-0.451963	0.0025271	0.0119268
	PCMT1	7045.11	5138.08	0.731221	-0.451621	0.00332817	0.0150917
	RPF2	2100.13	1543.93	0.731229	-0.451604	0.0101635	0.0383188
	DDX27	7214.82	5259.29	0.731385	-0.451297	0.00132243	0.00690702
	SSBP1	10502.1	7731.84	0.731519	-0.451033	0.00285603	0.013263
	MRPL22	3108.54	2250.58	0.731553	-0.450966	0.00301101	0.0138549
	ARHGEF19	3707.47	2700.4	0.732008	-0.450069	0.00859115	0.0333019
	SPATC1L	2166.48	1568.79	0.732257	-0.449578	0.00583317	0.0242404
	FAM173A	2495.32	1823.22	0.732296	-0.449501	0.00808374	0.0317929
	PIGM	1637.23	1202.07	0.732329	-0.449437	0.0085256	0.0331133
	SSSCA1	6041.18	4387.79	0.732336	-0.449421	0.00145184	0.00747432
	TARBP2	5314.14	3864.56	0.732376	-0.449344	0.00164771	0.00833325
	MRPS26	8728.99	6376.49	0.732423	-0.449251	0.00122645	0.00647968
	ERAL1	3881.06	2804.57	0.73289	-0.448331	0.00254342	0.0119805
	SHMT2	8313.94	6096.75	0.732929	-0.448254	0.00476279	0.0204806
	DVL2	2175.63	1567.3	0.732942	-0.448229	0.00831108	0.0325008
	ZNF276	1666.99	1197.57	0.733115	-0.447888	0.0101038	0.0381317
	HCFC1	3329.99	2415.62	0.73329	-0.447544	0.00317896	0.0145061
	CIRH1A	3169.73	2309.36	0.733699	-0.44674	0.00340783	0.015398
	ENDOG	6313.45	4780.7	0.73432	-0.44552	0.00542715	0.0227947
	DTNBP1	1544.57	1125.41	0.734371	-0.445419	0.011016	0.0409217
	UBQLN4	6716.94	4861.12	0.734381	-0.445399	0.00307693	0.014102
	PPP1R35	3445.86	2507.09	0.734566	-0.445036	0.00306173	0.0140412
	PDCD5	4003.51	2929.18	0.734776	-0.444624	0.00276042	0.0128613
	ZMYND19	4891.15	3579.58	0.735038	-0.44411	0.00241248	0.011462
	C10orf2	2332.95	1709.17	0.735585	-0.443035	0.00550035	0.0230457
	CYC1	22975.3	16724.9	0.735801	-0.442612	0.000918963	0.00504144
	IRF3	6774.02	4887.66	0.735955	-0.44231	0.00213148	0.0103344
	THAP4	8069.33	5897.37	0.736209	-0.441813	0.00138026	0.00714653
	EMC8	7386.24	5434.34	0.736651	-0.440947	0.00184161	0.00913879
	SNAPC4	1780.56	1294.32	0.736659	-0.44093	0.0085724	0.033248
	GNB5	3443.7	2499.83	0.736661	-0.440928	0.00556711	0.0232615
	PRDX6	19304.5	14150.2	0.737164	-0.439943	0.00118407	0.00626786
	EIF3B	29654.3	21660.3	0.73751	-0.439266	0.000845259	0.00469718
	RMND1	3732.12	2730.74	0.737863	-0.438575	0.00307705	0.014102
	SEC23IP	1385.45	1003.21	0.738001	-0.438306	0.0139313	0.0497358
	RPL5	24596.6	17882	0.73808	-0.438151	0.00166513	0.00840277
	C1orf159	1650.46	1195.04	0.738161	-0.437994	0.0103732	0.0389771
	NDUFA6	7361.77	5404.5	0.738278	-0.437764	0.0126114	0.0458312
	CPNE2	1591.2	1162.44	0.738577	-0.437179	0.0110989	0.0411424
	SRRM1	2262.8	1648.13	0.738608	-0.437119	0.00914413	0.0350621
	HABP4	1944.62	1419.79	0.739009	-0.436336	0.00875042	0.0337857
	SNRNP70	6741.83	5040.68	0.739087	-0.436185	0.00298785	0.0137529
	SNRPC	7565.9	5559.86	0.739131	-0.436099	0.00225497	0.0108412
	NOP9	4245.87	3122.49	0.739556	-0.435269	0.00294899	0.0135969
	SMARCC2	3579.22	2631.94	0.739597	-0.435189	0.00746083	0.0298216
	TSTA3	10830.2	7868.14	0.739777	-0.434838	0.00164903	0.00833378
	SURF2	7705.14	5660.45	0.739893	-0.434611	0.00170032	0.00855205
	EBPL	2780.94	2060.01	0.739898	-0.434602	0.00817579	0.0320539
	HDGF	57696.5	42233.3	0.739995	-0.434412	0.00155424	0.00792477
	UGGT1	2806.86	2026.02	0.740353	-0.433715	0.00922399	0.0353063
	CCDC137	6289.03	4577.42	0.74036	-0.433702	0.0023068	0.0110401
	TMEM138	1819.45	1345.88	0.740823	-0.4328	0.0109799	0.0408209
	CLDN7	14100.5	10278.4	0.740849	-0.432749	0.00225629	0.0108438
	PYCR2	4203.56	3085.04	0.741269	-0.43193	0.00436411	0.0190104
	TMX4	1581.07	1161.79	0.741368	-0.431738	0.0114042	0.0421583
	D2HGDH	1818.52	1341.99	0.741599	-0.431288	0.0100679	0.0380171
	RPS7	9032.04	6529.27	0.741924	-0.430656	0.00316505	0.0144522
	PKN1	10705.8	8059.3	0.742119	-0.430277	0.00466253	0.0200999
	RPAP3	1429.7	1049.09	0.742199	-0.430122	0.0139028	0.0496695
	DHPS	5527.52	4087.15	0.742478	-0.42958	0.00329192	0.0149619
	ATP5B	40514.6	29742	0.742707	-0.429135	0.00115502	0.00614487
	GPI	20210.6	14876.1	0.743087	-0.428396	0.00248584	0.0117617
	DDX18	2930.23	2153.62	0.743148	-0.428279	0.00520407	0.0220629
	ACAT2	2609.91	1928.65	0.743164	-0.428247	0.00599705	0.0248013
	PSMB2	8175.47	6024.44	0.743303	-0.427978	0.00202696	0.00991956
	CBR1	7357.57	5432.89	0.743389	-0.427812	0.0020735	0.0100997
	MRPL2	3186.4	2346.86	0.7434	-0.427789	0.00467222	0.0201227
	FTL	9106.7	6719.98	0.743631	-0.427342	0.00272217	0.012709
	HSD17B4	1707.14	1246.03	0.744111	-0.426411	0.0118999	0.0437669
	RPL37	27202.9	19690.5	0.745036	-0.424617	0.00195108	0.00959534
	EFNA3	2519.61	1865.94	0.745053	-0.424586	0.00673906	0.0274156
	SF3A3	3856.18	2821.97	0.745183	-0.424333	0.00802034	0.0315798
	CINP	3542.67	2621.67	0.745261	-0.424182	0.00495738	0.0211517
	POFUT1	2277.91	1681.35	0.745289	-0.424128	0.00843724	0.0328631
	IMPDH2	13017	9419.22	0.745418	-0.423879	0.00458604	0.0198262
	CXXC1	2411.72	1787.7	0.745489	-0.42374	0.00723444	0.0290605
	UMPS	2907.82	2154.33	0.745638	-0.423453	0.00586624	0.0243631
	PAF1	5524.44	4089.81	0.746415	-0.421949	0.00302163	0.0138944
	TXLNG	1765.34	1317.43	0.746434	-0.421912	0.0135736	0.0486453
	DHX15	2704.35	1976.2	0.746468	-0.421847	0.00994555	0.0376379
	SF3B2	18803.5	13962.9	0.747119	-0.420589	0.00154842	0.00790097
	DFFA	4514.55	3347.68	0.747271	-0.420296	0.00385669	0.017104
	MTFP1	5201.31	3754.86	0.747334	-0.420176	0.00759511	0.0302263
	MRPS15	8213.93	6105.31	0.747566	-0.419726	0.00246205	0.0116792
	PRDX3	4825.7	3582.17	0.747639	-0.419586	0.00356563	0.0160202
	MATR3	4220.24	3140.33	0.747692	-0.419484	0.00412602	0.0180881
	ALG1	1931.84	1413.96	0.747803	-0.41927	0.0114181	0.0421967
	DNAJA3	6832.92	5029.36	0.748019	-0.418853	0.00353105	0.0158857
	RNF166	1928.49	1424.07	0.748047	-0.4188	0.012943	0.0468156
	MKKS	3868.85	2808.13	0.748117	-0.418665	0.0124565	0.0454006
	MPZL1	2962.31	2183.19	0.748385	-0.418147	0.00782336	0.0309373
	CNPY3	5710.13	4144.9	0.748411	-0.418097	0.00692308	0.0280479
	VDAC3	3734.23	2753.24	0.748417	-0.418085	0.00512285	0.0217428
	ENO1	60361.4	44534.1	0.74857	-0.417791	0.00145532	0.00748714
	TBL3	2093.73	1554.33	0.748944	-0.41707	0.00973518	0.0369443
	DPH7	2500.35	1844.51	0.749053	-0.41686	0.00862462	0.0334222
	RNMTL1	2985.8	2181.48	0.749073	-0.416822	0.00753461	0.0300627
	ELAC2	4220.05	3108.43	0.749103	-0.416763	0.00620569	0.0255334
	NDUFA9	3690.95	2741.34	0.749486	-0.416026	0.00504646	0.021465
	CAND1	3103.63	2306.77	0.749808	-0.415407	0.00617531	0.025428
	MRPL11	7174.26	5315.59	0.749946	-0.415141	0.00597579	0.0247283
	TUBD1	5783.36	4322.78	0.749974	-0.415088	0.00397643	0.0175444
	MRPL3	7095.4	5306.18	0.750054	-0.414933	0.00332005	0.0150648
	CECR5	7215.06	5368.25	0.750097	-0.41485	0.00315279	0.0144011
	PRPF6	10259	7642.47	0.75072	-0.413653	0.00321127	0.0146389
	RPL36AL	14181.6	10535.6	0.75099	-0.413134	0.0104327	0.0391361
	ATF5	5721.74	4053.68	0.750998	-0.413118	0.00677695	0.0275361
	SLC25A15	2323.22	1730.81	0.751516	-0.412124	0.00946244	0.0360481
	MCM3AP	2887	2157.46	0.751548	-0.412062	0.00765028	0.030393
	NDUFS1	2262.52	1664.33	0.751744	-0.411687	0.013944	0.0497614
	SAP18	18569.8	13821.6	0.751763	-0.41165	0.00395417	0.0174686
	SET	25454.8	19009.9	0.75209	-0.411022	0.00180924	0.0089977
	CCT7	21505.9	15916.7	0.752395	-0.410437	0.00260294	0.0122356
	MRPS11	7521.46	5539.37	0.752771	-0.409716	0.00543079	0.022803
	ALDH1B1	1984.77	1486.39	0.753073	-0.409139	0.0123312	0.0450393
	ALG5	1895.84	1418.81	0.753158	-0.408975	0.0138865	0.049624
	GNL1	9467.75	7105.11	0.753482	-0.408355	0.00407231	0.0179041
	OPA1	2275.94	1692.97	0.753724	-0.407892	0.0110994	0.0411424
	TRAF2	3264.1	2442.85	0.754578	-0.406258	0.00699801	0.0282847
	YDJC	5026.59	3732.65	0.755419	-0.40465	0.00710856	0.0286555
	GCN1L1	3656.28	2749.17	0.75612	-0.403313	0.00664227	0.0270661
	NUCKS1	56601.7	41347.5	0.75645	-0.402683	0.0090264	0.0346757
	ANKRD52	8581.74	6434.22	0.757428	-0.40082	0.00362557	0.0162311
	MRPL40	3582.09	2716.43	0.757644	-0.400409	0.00868689	0.0336161
	DHCR7	12249	9281.37	0.757692	-0.400317	0.00325589	0.0148227
	GALK1	7247.14	5390.86	0.758201	-0.399347	0.00546036	0.0228991
	HNRNPK	12430.2	9371.17	0.758257	-0.399242	0.00305291	0.0140101
	EHMT2	6198.19	4596.89	0.758421	-0.398929	0.0101251	0.038191
	RBBP4	3094.79	2329.03	0.758672	-0.398453	0.00856843	0.033242
	NRP1	3138.62	2360.05	0.759047	-0.397739	0.00934882	0.0357045
	EIF5AL1	9809.86	7342.1	0.75915	-0.397542	0.00400161	0.0176441
	XPOT	6129.78	4609.02	0.759302	-0.397253	0.00488143	0.0208991
	MRPS23	9051.67	6825.07	0.759478	-0.39692	0.00457797	0.0198037
	PTMA	43488.5	32652.7	0.759621	-0.396649	0.00316806	0.0144612
	PSMB6	20435.2	15458.8	0.759709	-0.396481	0.00279907	0.0130282
	C8orf33	5502.75	4152.75	0.759746	-0.39641	0.00526089	0.0222393
	ERP29	12822.6	9630.01	0.759806	-0.396297	0.00388023	0.0171973
	BCL7C	8912.38	6581.44	0.759959	-0.396006	0.0120134	0.0440544
	FAU	28063.9	21090.3	0.760259	-0.395437	0.00290158	0.0134188
	UQCC2	5751.53	4330.54	0.760488	-0.395002	0.00648183	0.0265033
	PRPF40A	3442.74	2592.58	0.760561	-0.394865	0.00870317	0.0336696
	ADIPOR2	6165.95	4654.6	0.760712	-0.394579	0.00506778	0.0215419
	RPS8	40994	30303.9	0.760871	-0.394276	0.0105127	0.0393289
	COPRS	3083.16	2320.12	0.761241	-0.393574	0.0138614	0.049573
	TSPAN13	5484.38	4110.94	0.761626	-0.392846	0.0139802	0.049868
	DDX1	2512.15	1892.69	0.761808	-0.392502	0.0134646	0.0482925
	VPS29	3159.33	2375.18	0.762241	-0.391681	0.0137285	0.0491362
	DCXR	12652	9366.13	0.76227	-0.391625	0.00566677	0.0236204
	TNNT1	8359.48	6393.72	0.762299	-0.391571	0.00756606	0.0301535
	DCAF15	2545.02	1916.88	0.762727	-0.390762	0.0124942	0.0455137
	HNRNPL	13470.3	10037.1	0.762746	-0.390725	0.0059864	0.0247647
	PRPF31	9834.93	7426.71	0.762837	-0.390552	0.00483696	0.0207401
	GNL3L	4828.75	3546.44	0.763064	-0.390123	0.00981493	0.0371948
	TIMM17B	5437.51	4131.62	0.76346	-0.389375	0.00740899	0.0296489
	ARHGEF1	3739.23	2827.76	0.76363	-0.389054	0.010908	0.0405755
	NUDT16L1	4242.52	3250.85	0.763723	-0.388878	0.00852141	0.0331064
	FDX1L	3510.78	2645.88	0.763876	-0.38859	0.00977613	0.0370785
	CNDP2	3632.01	2770.42	0.764025	-0.388308	0.00919989	0.0352239
	CTCF	3936.64	2986.89	0.764306	-0.387777	0.00832333	0.0325302
	GRWD1	8149.39	6220.78	0.764338	-0.387718	0.00499924	0.0212877
	XRCC1	3212.45	2437.61	0.76462	-0.387186	0.010796	0.0402459
	RPL22	4825.29	3651.72	0.765164	-0.386159	0.0079493	0.0313811
	KNOP1	5356.74	4069.28	0.765403	-0.385709	0.00677658	0.0275361
	TXNL4A	6463.53	4914.66	0.765442	-0.385636	0.00592167	0.0245339
	SEMA4C	4704.94	3595.38	0.765572	-0.38539	0.00899006	0.0345458
	AIFM1	3918.25	2976.92	0.765981	-0.384619	0.00904196	0.0347258
	NAP1L1	10333.4	7841.84	0.766121	-0.384356	0.00815761	0.0320009
	TSPAN4	2862.16	2169.01	0.766244	-0.384124	0.0133922	0.048083
	LGMN	2693.45	2050.49	0.76659	-0.383474	0.0132187	0.0475845
	PSMB3	10478.3	8038.53	0.766768	-0.383137	0.00525531	0.0222225
	LRRC75A-AS1	8187.51	6308.67	0.766846	-0.382992	0.00843222	0.0328528
	PPP2R5C	3916.09	2994.27	0.767104	-0.382506	0.00963714	0.0366505
	ABCF2	5343.73	4041.83	0.767292	-0.382153	0.00805512	0.0316986
	TPI1	46898	36266.8	0.767384	-0.38198	0.00442695	0.0192597
	CDK4	25443	19322.8	0.76838	-0.380108	0.00706493	0.0284961
	METAP1	3266.09	2490.71	0.768666	-0.379571	0.011921	0.0438093
	NHP2L1	10111.2	7720.7	0.76869	-0.379525	0.00533141	0.0224544
	PLOD3	6081.81	4600.06	0.768787	-0.379343	0.00896682	0.0344854
	PYCRL	3222.38	2476.08	0.769341	-0.378305	0.012268	0.0448444
	WDR77	7159.37	5475.69	0.769711	-0.377611	0.00661624	0.0269719
	EIF2S3	5066.14	3876.16	0.769755	-0.377529	0.00905619	0.0347707
	SF3B5	12753.6	9951.07	0.769776	-0.377489	0.00831706	0.0325149
	ATP5A1	11604.5	8862.53	0.769939	-0.377183	0.00581432	0.0241694
	HDAC2	5705.69	4367.22	0.770176	-0.376741	0.00777046	0.0307724
	PPIG	5857.4	4468.76	0.770228	-0.376643	0.00915199	0.0350797
	ANKRD39	3078.51	2355.05	0.770582	-0.37598	0.0130812	0.0472259
	ILVBL	4118.49	3125.88	0.770855	-0.375468	0.0127569	0.0462376
	ZNF512B	4135.64	3166.74	0.770894	-0.375396	0.0104624	0.0392048
	RPL35A	41039.8	31604	0.771499	-0.374264	0.00439679	0.0191345
	HNRNPC	17114.7	13103.6	0.77172	-0.37385	0.0056584	0.0235927
	RPL24	18171.4	14002.8	0.772218	-0.372919	0.0050781	0.0215729
	RPRD2	3141.91	2408.74	0.772306	-0.372755	0.0136177	0.0487652
	TXNDC12	3238.13	2479.7	0.77244	-0.372505	0.0134127	0.048136
	SAE1	11470.8	8775.33	0.772488	-0.372415	0.00720883	0.0289696
	RPS11	51246.6	39002.4	0.773177	-0.371129	0.0139467	0.0497614
	MRPL14	12008.2	9252.29	0.773194	-0.371098	0.00634543	0.0260459
	FBP1	8597.26	6612.82	0.773486	-0.370552	0.00808299	0.0317929
	OBSL1	4320.85	3318.06	0.773992	-0.36961	0.0126043	0.0458175
	RRP7A	7700.73	5812.18	0.774088	-0.36943	0.0115209	0.0424983
	ESD	5788.84	4498.49	0.774146	-0.369322	0.0131467	0.0473764
	APOA1BP	12044.9	9265.06	0.774617	-0.368445	0.00648198	0.0265033
	POLR2G	6425.36	4951.33	0.774671	-0.368344	0.013414	0.048136
	ABCF3	4136.8	3181.41	0.774692	-0.368306	0.0116985	0.0431301
	MYO1C	10019.1	7659.28	0.774977	-0.367774	0.00832743	0.0325369
	MAGEF1	6972.63	5362.49	0.775488	-0.366825	0.00945944	0.0360467
	RPS14	77174.5	59285.8	0.776082	-0.365718	0.00527411	0.0222814
	MRPL21	7231.02	5541.46	0.776647	-0.364668	0.0107087	0.0399533
	RPUSD1	7987.78	6179.7	0.776703	-0.364566	0.00826336	0.0323326
	RPS5	48518.2	37026.8	0.776859	-0.364276	0.00846008	0.0329272
	ERI3	4100.69	3169.82	0.777551	-0.362991	0.013036	0.047075
	PMPCA	7996.31	6093.27	0.77801	-0.36214	0.0119502	0.0438777
	TOR3A	6240.37	4819.41	0.778269	-0.36166	0.0102828	0.0386795
	MRPL51	9235.22	7157.91	0.778865	-0.360555	0.0106845	0.0398847
	SLC25A3	15546	12058	0.779824	-0.35878	0.0074461	0.0297801
	MRPL38	12029.4	9207.57	0.780627	-0.357295	0.0104494	0.0391666
	MDH1	6144	4785.2	0.781356	-0.355948	0.0124265	0.0453271
	FAM136A	5075.73	3944.67	0.781855	-0.355027	0.0130047	0.0469867
	PHB	21872.8	16623	0.782301	-0.354205	0.0120059	0.0440387
	RAE1	9553.88	7386.54	0.782385	-0.354049	0.0104788	0.0392446
	BCCIP	4919.58	3828.2	0.782455	-0.35392	0.0136113	0.048755
	ATP1B3	5689.49	4457.44	0.782512	-0.353816	0.0129837	0.0469355
	ANXA5	6695.54	5248.78	0.783294	-0.352374	0.0126957	0.0460642
	INO80E	8702.42	6805.94	0.784543	-0.350075	0.0108709	0.0404811
	RPS15	24665	19122.7	0.784982	-0.349269	0.0102042	0.0384433
	BLVRB	10066.7	7843.08	0.785022	-0.349194	0.0127421	0.0461958
	ANAPC5	8968	7007.46	0.785859	-0.347657	0.0111219	0.0412037
	PTMS	26102.4	20431.6	0.786376	-0.346709	0.00998174	0.0377332
	RPS25	16035.1	12600	0.787319	-0.344979	0.0120285	0.0440981
	NPDC1	13727.2	10719.9	0.787804	-0.344092	0.0108106	0.0402895
	PSMD2	18154.7	14226.7	0.788399	-0.343003	0.0098614	0.0373606
	NHP2	19528.1	15420.9	0.793535	-0.333635	0.0117862	0.0433834
	SDC1	21281.9	26886.3	1.26066	0.334178	0.0122441	0.0447808
	PTPRF	13379.3	16921.1	1.262	0.335711	0.0133671	0.0480432
	EMP2	43911.4	55078	1.2627	0.336516	0.0114916	0.0424129
	MAP7D1	10336.4	13066.1	1.26286	0.336691	0.0126629	0.0459574
	CALR	57854.1	73487.3	1.26546	0.339661	0.0088286	0.0340397
	NRBP1	21688.6	27322.2	1.26718	0.341621	0.0117504	0.043275
	KIAA0930	8356.31	10651.4	1.26749	0.341972	0.013198	0.0475348
	SSR1	5066.77	6513	1.2722	0.347323	0.0139323	0.0497358
	ITGB4	7478.62	9580.25	1.27297	0.348194	0.0107529	0.0401071
	PXN	13400.4	17150.8	1.2741	0.349481	0.00867435	0.0335865
	NCOA3	20579.6	26490.3	1.27476	0.35023	0.00837053	0.0326774
	DCTN5	8641.31	11047.9	1.27551	0.35107	0.010207	0.0384433
	CUX1	10259.9	13176.2	1.27618	0.351835	0.00991221	0.0375428
	GNAS	212135	272593	1.27704	0.352801	0.00883335	0.0340485
	GSTM4	5217.76	6760.56	1.27775	0.35361	0.0123403	0.0450605
	TRIB3	7259.75	9331.31	1.27927	0.355323	0.0101914	0.0384094
	NDUFA1	6996.42	8959.59	1.27981	0.355926	0.0131016	0.0472869
	TPM4	28221	36362.8	1.28291	0.359418	0.00602097	0.0248852
	TSC22D4	5820.48	7494.42	1.28327	0.359823	0.0109044	0.0405731
	TM7SF2	12003.3	15555.8	1.28344	0.360016	0.00747215	0.0298581
	TUBB3	28334.6	36914	1.28376	0.360376	0.00660033	0.0269151
	PRSS8	10139.8	13089.7	1.28399	0.360633	0.00793123	0.0313209
	DNM2	8489.24	10937.1	1.28567	0.362521	0.0081168	0.0318773
	LAMTOR4	10296.8	13341.1	1.28607	0.362973	0.0100711	0.0380188
	RAD23B	15461.2	20026.4	1.28636	0.363291	0.00643881	0.0263661
	NAGK	4791.16	6206.32	1.28642	0.363359	0.00977903	0.0370793
	CELSR1	3172.59	4113.88	1.28708	0.364106	0.0129108	0.0467336
	C9orf69	7127.99	9232.7	1.28925	0.366538	0.00927889	0.0354769
	ENTPD6	5375.4	6982.99	1.28943	0.366735	0.00863535	0.0334509
	SPRYD3	5160.15	6747.45	1.28983	0.367178	0.00897139	0.0344934
	GSTZ1	8077.37	10451.5	1.29099	0.36848	0.0067947	0.0275848
	TIMP2	7646.15	9959.89	1.29101	0.368495	0.00728955	0.0292392
	RNF121	3395.94	4409.81	1.29122	0.368736	0.0110911	0.0411424
	UBXN6	6297.31	8183.12	1.29139	0.368925	0.00941813	0.0359292
	TMEM50A	3475.09	4532.48	1.29142	0.368962	0.0137976	0.0493708
	CDC42BPB	7916.65	10286.1	1.29156	0.369115	0.00664329	0.0270661
	CERS2	22632.7	29124.8	1.29222	0.369857	0.0108861	0.040527
	FAM83H	9135.8	11867.2	1.29274	0.370434	0.00618485	0.0254552
	SCCPDH	5873.47	7684.31	1.29577	0.373805	0.00882507	0.0340356
	MBD6	3655.24	4786.64	1.29577	0.373815	0.00969896	0.0368469
	CST3	20822	27207.5	1.29805	0.376341	0.00428831	0.0187397
	C6orf89	5083.51	6620.56	1.2995	0.377962	0.0094658	0.0360509
	LYPLA2	5608.89	7359.14	1.30007	0.378595	0.0078652	0.0310848
	ESRP2	4906.54	6397.62	1.30018	0.378715	0.00711145	0.0286588
	HLA-E	14534.6	19076.1	1.30064	0.379223	0.00452182	0.0196103
	CLIC3	9058.3	12366.1	1.30191	0.380631	0.0100027	0.0377967
	AREG	4694.35	6141.7	1.30212	0.38086	0.00735099	0.0294512
	UBALD1	5300.7	6889.43	1.30321	0.382071	0.00693254	0.0280779
	WBP1L	2669.03	3498.78	1.30382	0.382739	0.0117283	0.0432169
	WWP2	3282.34	4293.67	1.30393	0.382872	0.0091089	0.0349535
	PTTG1IP	15409.5	20203.9	1.30438	0.38336	0.00379821	0.0168828
	TMEM132A	12168	15915.2	1.30492	0.383965	0.00409644	0.0179871
	GPR108	3283	4316.76	1.30517	0.384237	0.0104014	0.0390507
	BCAM	7196.33	9466.84	1.30521	0.384277	0.00564659	0.0235506
	BAG3	7886.16	10380.4	1.30545	0.38455	0.00502554	0.0213859
	KCNK15	3910.39	5092.47	1.30564	0.384759	0.00768567	0.0304983
	BRK1	6942.48	9241.35	1.30576	0.384885	0.00641072	0.0262687
	WIPF2	3181.27	4187.72	1.30594	0.385093	0.00840137	0.0327712
[truncated: 1,851 more rows]

## Sheet: SJSA
Polysomal RNA-seq - SJSA - DESeq2 Results (Nutlin vs. DMSO) - Refseq genes - padj < 0.05
	Gene ID	Base Mean DMSO	Base Mean Nutlin	Fold Change	Fold Change (log2)	p	padj
	GDF15	328.281	84395.5	195.804	7.61327	2.50681e-129	3.43333e-125
	RRAD	63.1449	5917.01	69.6215	6.12146	9.69342e-84	6.63806e-80
	CDKN1A	11365.1	457471	34.5288	5.10973	1.38254e-68	5.8786e-65
	TRIM55	0.807695	1748.46	351.175	8.45605	1.71688e-68	5.8786e-65
	LOC100130075	11.931	1924.79	99.5629	6.63754	3.97595e-61	1.08909e-57
	BTG2	452.846	13643.8	25.6762	4.68236	1.12697e-54	2.57251e-51
	EPS8L2	5.222	892.259	88.2923	6.46422	2.61439e-51	5.11525e-48
	BBC3	333.709	13012.5	30.3402	4.92316	7.83566e-48	1.34146e-44
	HES2	3.8704	928.947	101.917	6.67125	2.84032e-47	4.32234e-44
	KRT78	20.2321	1170.98	40.7463	5.3486	3.68887e-46	5.05228e-43
	PDE6G	1.67141	697.016	122.806	6.94024	1.0102e-45	1.2578e-42
	FDXR	2476.39	46500.4	16.5604	4.04966	2.65234e-44	3.0272e-41
	CSPG4	9.52426	731.752	48.8811	5.6112	9.18933e-44	9.68131e-41
	LINC01089	23.6869	895.988	28.2375	4.81954	8.92244e-40	8.14678e-37
	NUPR1	27.3496	1363.64	32.7688	5.03425	8.62858e-40	8.14678e-37
	SESN2	636.074	10189.2	14.0034	3.8077	4.4377e-39	3.79867e-36
	ATF3	555.951	9112.27	14.2274	3.8306	7.04801e-36	5.67821e-33
	GAL3ST1	1.23955	420.176	85.5301	6.41836	1.43104e-35	1.08886e-32
	UNC5B-AS1	5.27803	470.093	47.5392	5.57105	3.0537e-35	2.20123e-32
	ITGB2-AS1	57.274	1242.03	17.6147	4.13871	2.35756e-34	1.61446e-31
	TNFSF9	1368.25	22048	13.9909	3.80642	3.06854e-34	2.00127e-31
	KANK3	10.8759	550.512	32.4006	5.01795	9.76329e-34	6.07809e-31
	IFITM10	77.8281	1624.14	17.7838	4.15249	5.74537e-33	3.42124e-30
	PTCHD4	89.437	1517.74	14.3991	3.84791	9.22668e-33	5.26536e-30
	FOXD2-AS1	506.885	7392.95	13.084	3.70973	1.12272e-32	6.15072e-30
	FUT5	5.10995	451.648	44.9722	5.49096	2.35132e-32	1.2386e-29
	C9orf169	20.776	760.259	25.1543	4.65273	3.17777e-32	1.61196e-29
	TP53I3	1590.4	17918.2	10.139	3.34185	5.57869e-31	2.72878e-28
	TBX4	1.12751	383.414	71.6748	6.16339	1.39934e-30	6.60875e-28
	TYMSOS	116.651	1757.75	12.6972	3.66644	1.5477e-29	7.06578e-27
	MYO16-AS1	3.17475	346.574	46.0226	5.52427	3.38438e-29	1.49524e-26
	TSPAN11	32.763	699.555	16.8773	4.07702	3.75776e-28	1.60832e-25
	SESN1	565.251	6195.39	9.69885	3.27781	2.06449e-27	8.56825e-25
	EFNB1	913.29	8931.82	8.77715	3.13375	4.66145e-27	1.87774e-24
	CYFIP2	908.708	8837.55	8.76491	3.13174	5.89622e-27	2.30727e-24
	PGF	69.98	1585.21	17.2173	4.10579	9.78643e-27	3.72319e-24
	SPATA18	27.9168	625.481	17.3111	4.11363	1.34007e-26	4.96043e-24
	TP53INP1	182.595	2051.56	9.84257	3.29904	1.75413e-26	6.32226e-24
	SERPINF2	4.03847	291.605	35.3062	5.14185	2.80784e-26	9.86057e-24
	IP6K3	215.286	2350.84	9.56522	3.2578	6.04293e-26	2.0691e-23
	PSCA	119.098	1439.97	10.4856	3.39034	7.44978e-26	2.48859e-23
	FSTL4	514.294	5028.59	8.82029	3.14083	9.02455e-26	2.94286e-23
	UNC5B	64.0156	952.726	12.1902	3.60765	4.05685e-25	1.29215e-22
	VWCE	6.40553	334.762	28.2242	4.81886	5.49784e-25	1.71133e-22
	TMEM105	0.43186	234.458	57.0449	5.83403	1.58032e-24	4.8098e-22
	ARC	27.2935	545.95	15.1161	3.91802	2.84271e-24	8.46387e-22
	DDIT4	500.463	4365.09	7.8453	2.97183	1.04994e-23	3.04789e-21
	MDM2	76707.3	668307	7.76077	2.9562	1.06818e-23	3.04789e-21
	KRT4	5.76591	282.992	26.6935	4.73842	1.15508e-22	3.22858e-20
	C17orf64	0.375835	190.034	49.8382	5.63918	1.34421e-22	3.68207e-20
	UBASH3A	0	186.047	54.1339	5.75846	2.2755e-22	6.11085e-20
	HGFAC	2.42308	215.753	33.9734	5.08633	2.90155e-22	7.64223e-20
	PLK3	330.121	2821.04	7.62938	2.93157	3.45623e-22	8.93141e-20
	ZFPM1	287.105	2470.6	7.69533	2.94398	3.64913e-22	9.25529e-20
	PHLDA3	3624.47	29704.6	7.35628	2.87898	5.49876e-22	1.36929e-19
	NHLH2	2.36706	208.128	33.0832	5.04803	1.05046e-21	2.56911e-19
	FUT3	0.375835	179.969	46.6153	5.54273	1.14783e-21	2.75801e-19
	NR1D1	581.284	4526.93	7.09125	2.82604	1.60643e-21	3.7934e-19
	PRDM1	116.005	1126.57	8.49652	3.08687	3.54413e-21	8.22718e-19
	POU2F2	402.641	5091.75	9.61664	3.26553	4.83228e-21	1.10305e-18
	PDE4C	2.68687	248.51	33.0537	5.04674	5.35528e-21	1.20239e-18
	SULF2	322.025	3852.79	9.92023	3.31037	6.30531e-21	1.39286e-18
	FLJ31104	1.61539	186.003	34.9195	5.12596	7.25037e-21	1.57621e-18
	KLHL30	179.444	1557.52	7.68133	2.94136	1.0042e-20	2.14898e-18
	ICOSLG	100.369	1033.3	8.86909	3.14879	1.14843e-20	2.41983e-18
	GAS6-AS1	0	158.286	47.5878	5.57252	1.43153e-20	2.97064e-18
	LOC101929224	0.375835	165.089	43.0178	5.42686	1.58866e-20	3.24751e-18
	DFNB31	155.339	1369.61	7.83969	2.9708	3.71534e-20	7.48314e-18
	INHBB	85.4616	885.199	9.07646	3.18213	4.75662e-20	9.44154e-18
	LAPTM5	160.981	1369.14	7.62185	2.93014	7.35226e-20	1.43852e-17
	APOBEC3H	1.67141	188.742	33.1591	5.05133	1.27434e-19	2.45821e-17
	DLX3	47.3015	561.418	9.80572	3.29362	1.58465e-19	3.01436e-17
	KRT3	16.1539	318.29	14.2172	3.82957	1.65894e-19	3.11244e-17
	INPP5D	346.319	2597.61	6.80338	2.76625	1.92214e-19	3.55751e-17
	CDC42BPG	3.06271	192.491	26.509	4.72841	3.37245e-19	6.15855e-17
	LSP1	3.55059	192.533	24.7122	4.62715	4.34332e-19	7.82711e-17
	IGFL3	1.72744	194.586	32.6345	5.02833	6.49465e-19	1.15521e-16
	LOC100288181	4.35828	215.267	23.2039	4.53629	6.76453e-19	1.18778e-16
	GNG7	38.704	669.126	13.389	3.74297	1.07098e-18	1.85672e-16
	PPP1R32	72.6762	709.932	8.34635	3.06115	1.09347e-18	1.87202e-16
	C19orf83	19.3123	341.469	13.0956	3.71101	1.16432e-18	1.9687e-16
	EDA2R	334.005	2363.53	6.37844	2.6732	1.49115e-18	2.49058e-16
	CMBL	360.542	2615.87	6.47989	2.69597	2.34354e-18	3.86712e-16
	TSGA10IP	0	135.115	39.7446	5.31269	2.56052e-18	4.17486e-16
	FCGBP	2.42308	167.356	26.2517	4.71434	2.61608e-18	4.21527e-16
	EPPK1	18.5606	321.796	12.8139	3.67963	2.65923e-18	4.23497e-16
	EDN2	281.412	2047.62	6.49515	2.69936	2.7164e-18	4.27629e-16
	NOTCH1	406.924	2736.08	6.1046	2.6099	4.4685e-18	6.95461e-16
	C6orf52	68.0775	778.107	9.25232	3.20982	4.53495e-18	6.97872e-16
	RGS12	3432.46	20978.9	5.61607	2.48956	7.78762e-18	1.1851e-15
	ISG20	133.559	1051.41	6.90336	2.7873	1.50031e-17	2.25805e-15
	SPATA31E1	24.2542	354.968	11.0493	3.46589	1.76742e-17	2.63115e-15
	LOC644656	16.0255	332.182	14.2239	3.83024	1.79472e-17	2.64307e-15
	CAHM	17.6012	303.965	12.4132	3.63381	2.23827e-17	3.26121e-15
	GADD45A	3358.76	20386.2	5.60018	2.48547	2.31785e-17	3.3416e-15
	THSD1	56.3542	559.664	8.32309	3.05712	2.72122e-17	3.88228e-15
	UCKL1-AS1	11.1	247.479	14.8354	3.89098	4.41095e-17	6.22808e-15
	HLA-DMA	39.6494	450.12	9.3347	3.2226	5.15236e-17	7.20068e-15
	DAO	0	118.707	35.5167	5.15042	5.66897e-17	7.84264e-15
	LOC101928766	8.13297	209.933	15.9667	3.997	5.93483e-17	8.12835e-15
	ETV7	148.992	1240.72	7.02377	2.81225	6.46621e-17	8.76843e-15
	OPRL1	68.9412	657.806	8.04766	3.00857	6.68687e-17	8.97876e-15
	EPHB3	402.416	2531.62	5.73502	2.5198	7.71153e-17	1.02541e-14
	FAM43A	1175.28	7069.76	5.56404	2.47613	8.7413e-17	1.15116e-14
	GBX2	639.729	4159.14	5.70277	2.51166	9.51995e-17	1.24176e-14
	H1F0	3944.72	630.991	0.177388	-2.49502	9.62363e-17	1.24345e-14
	POU3F1	51.445	531.257	8.65	3.1127	1.08609e-16	1.3902e-14
	LOC400684	37.7772	440.549	9.35493	3.22573	1.27495e-16	1.61682e-14
	KIAA1324	336.073	2165.55	5.85063	2.54859	1.4596e-16	1.83401e-14
	RALGDS	418.853	2904.04	6.59526	2.72143	1.67591e-16	2.08666e-14
	LHX4	241.025	1621.06	6.13556	2.6172	1.70741e-16	2.10673e-14
	CD22	370.314	2311.62	5.67306	2.50413	1.73559e-16	2.12238e-14
	ADCK3	430.055	2731.58	5.80149	2.53642	1.90869e-16	2.29311e-14
	TREM2	0	113.668	33.8931	5.08292	1.89599e-16	2.29311e-14
	C17orf82	8.43645	271.434	17.9916	4.16925	2.06243e-16	2.43509e-14
	GAL3ST4	128.596	961.501	6.73708	2.75212	2.0571e-16	2.43509e-14
	CSF2	64.0553	770.405	9.08541	3.18355	2.09365e-16	2.45083e-14
	PLEK	0	112.15	33.4974	5.06598	2.57567e-16	2.98952e-14
	ATE1-AS1	16.4013	307.979	13.0631	3.70743	2.64428e-16	3.04337e-14
	ZBTB7C	48.4057	477.065	8.21112	3.03758	2.98802e-16	3.41033e-14
	CX3CR1	0.375835	120.94	30.6298	4.93686	3.62882e-16	4.10746e-14
	CEL	10.6518	223.777	13.8215	3.78884	4.25114e-16	4.77243e-14
	ARHGAP30	1.67141	137.392	24.6359	4.62269	4.40452e-16	4.90442e-14
	ASPRV1	12.1714	232.856	13.0432	3.70523	4.51032e-16	4.98172e-14
	AEN	5009.97	30393.7	5.48524	2.45555	4.63087e-16	5.07395e-14
	FAM111B	1172.87	168.111	0.162099	-2.62505	6.73394e-16	7.31969e-14
	OSGIN1	917.488	5150.34	5.18393	2.37405	8.48113e-16	9.14627e-14
	KIAA0247	684.559	3925.32	5.36821	2.42444	1.03488e-15	1.10732e-13
	CDX1	24.5343	378.609	11.0104	3.46079	1.1552e-15	1.22648e-13
	TLR9	2.53513	141.645	21.59	4.43229	1.99105e-15	2.09765e-13
	BOK-AS1	35.9868	383.842	8.70881	3.12248	2.51292e-15	2.62725e-13
	LINC01311	62.496	539.342	7.30402	2.86869	2.88971e-15	2.9983e-13
	PLCH2	2.91097	152.196	20.5482	4.36094	4.16722e-15	4.29129e-13
	C1orf213	41.8951	506.855	9.52173	3.25122	4.27613e-15	4.33821e-13
	TSKU	834.795	5073.8	5.65996	2.50079	4.25739e-15	4.33821e-13
	PSTPIP2	692.58	4418.41	5.67604	2.50488	4.87925e-15	4.91369e-13
	MNS1	592.302	68.5733	0.131217	-2.92997	4.97041e-15	4.96896e-13
	SLC1A7	506.039	2945.74	5.27149	2.39821	5.67181e-15	5.62906e-13
	RNF19B	848.031	4512.33	4.92213	2.29928	6.77987e-15	6.68037e-13
	STAMBPL1	728.401	84.4042	0.135566	-2.88293	8.76239e-15	8.57212e-13
	RRM2B	852.851	4495.87	4.88752	2.2891	9.91435e-15	9.63028e-13
	KMT2E-AS1	59.8651	569.947	7.60523	2.92699	1.0946e-14	1.05575e-12
	SLC2A5	0	96.0071	28.3348	4.8245	1.49446e-14	1.43134e-12
	DKFZP434A062	7.00547	170.894	14.3916	3.84716	1.59903e-14	1.52085e-12
	AGBL5-AS1	0	97.0487	28.1842	4.81681	1.62038e-14	1.53053e-12
	KRT79	243.8	1435.85	5.3785	2.42721	1.6675e-14	1.56426e-12
	SNHG10	85.3495	734.38	7.45843	2.89887	1.79327e-14	1.67079e-12
	INHBC	23.0146	286.476	9.60921	3.26442	1.82562e-14	1.68944e-12
	HUS1B	38.5616	408.703	8.38995	3.06866	2.41264e-14	2.21768e-12
	KAZN	479.414	3398.02	6.49629	2.69962	2.52943e-14	2.30954e-12
	PIDD1	293.217	1753.54	5.32971	2.41406	2.55432e-14	2.31682e-12
	JHDM1D-AS1	35.074	389.138	8.77098	3.13274	2.58403e-14	2.32835e-12
	MSX2	439.879	2352.43	4.90709	2.29487	3.33118e-14	2.96259e-12
	VEGFA	2521.14	12401.4	4.5593	2.18881	3.31939e-14	2.96259e-12
	C6orf226	307.349	1749.03	5.11782	2.35553	3.73994e-14	3.30466e-12
	SLC9A1	1806.85	9292.4	4.7216	2.23928	4.06534e-14	3.56916e-12
	CEACAM1	7.06149	196.281	15.0609	3.91274	4.77258e-14	4.16339e-12
	VAMP1	164.221	1131.2	6.34719	2.66612	5.8713e-14	5.08945e-12
	KLHDC7A	162.51	1249.21	6.92514	2.79184	6.02401e-14	5.18899e-12
	C12orf5	1823.02	9115.57	4.65845	2.21985	6.07182e-14	5.19736e-12
	CPSF4	1628.44	8691.78	4.93841	2.30405	6.10963e-14	5.19736e-12
	RBFOX3	9.73202	213.984	13.258	3.7288	6.89338e-14	5.82789e-12
	MPP2	586.492	78.3657	0.155171	-2.68807	7.03378e-14	5.9101e-12
	SAA1	42.4647	382.156	7.44565	2.8964	7.43155e-14	6.20625e-12
	APOBEC3C	1716.79	8719.82	4.59525	2.20014	7.61132e-14	6.30813e-12
	SSX2IP	653.759	92.2361	0.162157	-2.62454	7.64567e-14	6.30813e-12
	CUX2	5.97367	166.015	14.4643	3.85442	7.83104e-14	6.42239e-12
	SV2A	2182.16	412.862	0.206015	-2.27918	8.01523e-14	6.53432e-12
	DHRS2	28.4374	310.212	8.56252	3.09804	8.51183e-14	6.89811e-12
	MYRIP	1.67141	141.323	21.1942	4.4056	8.67591e-14	6.98972e-12
	C2	7.53304	167.086	13.2226	3.72494	8.90735e-14	7.13421e-12
	LGALS8-AS1	8.82862	176.137	12.4522	3.63833	9.30582e-14	7.41003e-12
	KIAA1211L	0	88.9564	26.1267	4.70745	9.39104e-14	7.43466e-12
	CCNE2	1159.74	198.092	0.18929	-2.40133	1.03248e-13	8.12689e-12
	ABCA12	0	88.1973	25.8622	4.69277	1.17432e-13	9.19059e-12
	TRIAP1	764.133	4688.62	5.67527	2.50469	1.18106e-13	9.19076e-12
	KIF1A	49.6219	542.467	8.46627	3.08173	1.22886e-13	9.4615e-12
	WDR81	608.423	3058.96	4.63953	2.21398	1.22966e-13	9.4615e-12
	GNA15	6.66932	161.033	13.7792	3.78442	1.26023e-13	9.6425e-12
	LOC100507156	14.842	233.117	10.9276	3.4499	1.40399e-13	1.06828e-11
	KCNQ1OT1	64.9681	489.754	6.45877	2.69126	1.56001e-13	1.18044e-11
	CD7	14.9143	212.707	10.1379	3.34168	1.78744e-13	1.34509e-11
	ARMCX2	534.878	50.6494	0.125991	-2.9886	2.56705e-13	1.92122e-11
	SLC9A3R1	13605.8	62339	4.27987	2.09757	2.59517e-13	1.93171e-11
	JAKMIP2	314.613	29.4973	0.116726	-3.0988	2.83086e-13	2.09575e-11
	GSG1L	0.43186	94.2751	23.0962	4.52958	3.00459e-13	2.21241e-11
	SMOX	518.225	2922.5	5.2418	2.39006	3.14462e-13	2.30314e-11
	ILF3-AS1	555.538	3818.61	5.74002	2.52106	3.29828e-13	2.40283e-11
	SOWAHB	6.44522	165.018	14.2884	3.83677	3.48985e-13	2.52894e-11
	MCM6	4104.67	722.306	0.201804	-2.30898	3.70128e-13	2.66804e-11
	CLCA2	1.67141	116.157	19.5045	4.28574	4.1977e-13	3.01003e-11
	NFATC4	763.264	120.736	0.180752	-2.46792	5.09675e-13	3.63568e-11
	C12orf45	1246.31	7451.85	5.23235	2.38746	5.14834e-13	3.65345e-11
	LINC00324	29.0933	292.861	8.04717	3.00848	5.52123e-13	3.89788e-11
	DHRS3	366.439	1932.9	5.13587	2.36061	5.73299e-13	4.02661e-11
	SERTAD1	1360.89	6898.18	4.56008	2.18906	6.89813e-13	4.82024e-11
	LCE1C	0	84.4582	23.5448	4.55734	8.01966e-13	5.5755e-11
	YEATS4	982.906	174.144	0.196915	-2.34436	8.81649e-13	6.09852e-11
	TOB1	617.585	2926.31	4.40733	2.13991	1.10985e-12	7.63846e-11
	ZNF79	191.75	1046.53	4.91855	2.29823	1.38285e-12	9.46978e-11
	MYOZ3	3.06271	121.466	16.1098	4.00986	1.43084e-12	9.74961e-11
	RGS16	475.98	2272.78	4.4128	2.1417	1.52661e-12	1.03507e-10
	MXD4	908.589	4509.3	4.57812	2.19476	1.55365e-12	1.04822e-10
	FBXO5	1458.22	272.392	0.204987	-2.28639	1.5937e-12	1.06997e-10
	CATSPERD	0.43186	88.7402	21.3134	4.41369	1.66037e-12	1.10391e-10
	PLXNB2	6299	27471.4	4.07693	2.02748	1.65636e-12	1.10391e-10
	LINC01119	10.9156	176.358	10.6155	3.4081	1.78066e-12	1.17816e-10
	POLH	1996.07	8780.19	4.1318	2.04677	1.88651e-12	1.24219e-10
	FAS	595.906	3130.53	4.64287	2.21502	1.9283e-12	1.26364e-10
	C19orf80	0.43186	86.7134	21.112	4.39999	2.10418e-12	1.37232e-10
	IBA57-AS1	0.863719	93.7641	19.9169	4.31592	2.34971e-12	1.52519e-10
	THUMPD3-AS1	49.3091	395.213	6.59049	2.72039	2.4601e-12	1.58932e-10
	MAP2K3	3903.22	18752.5	4.57072	2.19242	2.53846e-12	1.63224e-10
	CDC42EP2	1617.35	7091.49	4.09817	2.03498	2.61197e-12	1.67166e-10
	LGALS12	77.3706	516.09	5.77201	2.52907	2.8178e-12	1.795e-10
	DUSP14	2664.57	11569.1	4.14183	2.05027	2.96335e-12	1.87899e-10
	SLFN11	693.936	91.7202	0.1596	-2.64747	2.98893e-12	1.88647e-10
	GRIP2	150.691	880.19	5.38883	2.42997	3.0779e-12	1.93371e-10
	TMEM51-AS1	7.81316	148.963	11.5817	3.53378	3.36963e-12	2.10733e-10
	TNFRSF10B	5378.82	23875.3	4.08525	2.03043	3.79472e-12	2.36239e-10
	DLG3	1807.69	377.528	0.22697	-2.13943	3.88615e-12	2.39751e-10
	SRGAP3	23.911	256.266	8.12562	3.02248	3.88241e-12	2.39751e-10
	LHFPL3-AS2	0.75167	93.5258	19.2978	4.27037	4.31381e-12	2.64942e-10
	SGK223	732.145	3992.46	4.76253	2.25173	4.3427e-12	2.65525e-10
	AKAP5	292.5	30.4972	0.133709	-2.90283	4.85209e-12	2.95352e-10
	HSPB8	532.593	2422.66	4.21639	2.07601	5.68607e-12	3.44586e-10
	LINC00942	23.0146	240.369	8.08921	3.016	5.97275e-12	3.60365e-10
	TNFRSF10D	4338.39	20096.5	4.19312	2.06802	6.73112e-12	4.0434e-10
	NLRP12	1.50334	121.746	18.1406	4.18115	7.57666e-12	4.53144e-10
	ZSCAN10	0.863719	87.6961	18.7365	4.22778	7.78845e-12	4.63785e-10
	FAM212B	775.644	3831.64	4.47695	2.16251	7.8283e-12	4.6414e-10
	MMRN2	3.2868	109.629	14.4618	3.85417	8.33868e-12	4.9227e-10
	FAM87A	1.18353	88.1899	17.6129	4.13856	8.66384e-12	5.0927e-10
	PRRX1	380.553	48.1166	0.150772	-2.72956	9.62522e-12	5.63364e-10
	TNXB	10.9319	164.556	9.94127	3.31343	1.07891e-11	6.28798e-10
	ITPKC	624.136	2862.62	4.21729	2.07632	1.36973e-11	7.94907e-10
	ABTB2	175.295	1106.43	5.49875	2.4591	1.45865e-11	8.42937e-10
	HAUS1	1791.84	387.556	0.233959	-2.09567	1.51342e-11	8.70914e-10
	FAT2	0.807695	82.1318	17.7735	4.15165	1.9931e-11	1.14215e-09
	PARP2	1981.53	417.83	0.232197	-2.10658	2.49609e-11	1.42444e-09
	DLGAP5	2259.83	319.744	0.172506	-2.53528	2.61182e-11	1.48429e-09
	FOSL2	1304.91	5850.88	4.2467	2.08634	2.64778e-11	1.49851e-09
	ZMAT3	1847.35	7778.35	3.89535	1.96175	2.76337e-11	1.55749e-09
	LINC01186	14.0506	175.402	8.7577	3.13055	3.07013e-11	1.71989e-09
	PLCD3	1080.58	4739.52	4.18978	2.06687	3.07661e-11	1.71989e-09
	HHIPL1	9.14843	147.435	10.0907	3.33496	3.48648e-11	1.94108e-09
	WDR65	16.8099	196.635	8.24532	3.04358	3.50064e-11	1.94108e-09
	SH2B2	2308.38	9607.1	3.92496	1.97268	3.53083e-11	1.94993e-09
	SDCBP2-AS1	39.1359	368.455	7.59767	2.92556	3.65551e-11	2.01068e-09
	IFI44	791.135	138.869	0.203607	-2.29614	3.95269e-11	2.16544e-09
	SALL2	188.674	12.8509	0.10628	-3.23406	4.17896e-11	2.28028e-09
	UBTD1	830.42	4387.99	4.84076	2.27523	4.35864e-11	2.36888e-09
	CDH22	0.43186	74.8599	18.1515	4.18202	4.45385e-11	2.41106e-09
	KRT8	831.055	3482.13	3.90771	1.96632	5.02633e-11	2.71026e-09
	GPC1	13239.2	51650.6	3.66642	1.87437	5.39999e-11	2.90032e-09
	C11orf71	56.0904	377.037	5.69513	2.50973	5.69916e-11	3.04905e-09
	GPR87	14.5385	175.171	8.46057	3.08076	6.03795e-11	3.21774e-09
	BAX	6219.04	34744.5	5.02687	2.32966	6.30783e-11	3.34853e-09
	LOC102060414	4.15052	109.384	12.6113	3.65665	6.61891e-11	3.5001e-09
	CES2	1235.19	6240.39	4.53601	2.18142	6.66872e-11	3.51288e-09
	MAFA	155.028	801.728	4.62537	2.20957	6.71115e-11	3.52168e-09
	FBXW7	560.104	2701.19	4.19767	2.06959	6.77799e-11	3.54318e-09
	SPSB1	1833.75	7438.54	3.8954	1.96177	6.81369e-11	3.5483e-09
	EPHA2	3248.63	12768.4	3.68283	1.88082	6.89864e-11	3.57893e-09
	IQCC	515.067	84.6891	0.187572	-2.41449	7.01308e-11	3.61094e-09
	TRAF4	1418.25	6241.98	4.02574	2.00925	7.01301e-11	3.61094e-09
	RNF112	6.83739	128.295	10.6882	3.41795	7.23888e-11	3.71325e-09
	ARG2	636.716	110.381	0.200025	-2.32175	7.75849e-11	3.96494e-09
	EEF1E1	1105.8	226.602	0.222647	-2.16717	7.98278e-11	4.06439e-09
	POLE2	605.031	101.81	0.195342	-2.35593	8.04018e-11	4.07846e-09
	LOC100272217	13.4344	210.191	10.0624	3.33091	9.15119e-11	4.6249e-09
	PVT1	87.9967	602.633	5.84967	2.54836	9.29388e-11	4.67974e-09
	NEK2	2218.44	386.49	0.19591	-2.35173	9.33531e-11	4.68339e-09
	ABHD4	1381.04	5466.31	3.7166	1.89398	9.45835e-11	4.72779e-09
	TINCR	10.444	147.425	9.23724	3.20746	9.96125e-11	4.96106e-09
	GRIK5	3.11873	99.2917	13.1615	3.71825	1.03608e-10	5.14136e-09
	SRXN1	1561.23	6725.56	4.37313	2.12867	1.05528e-10	5.21772e-09
	LCE1B	0.375835	73.1108	17.216	4.10567	1.098e-10	5.40942e-09
	NHLH1	8.24502	136.596	10.1513	3.34359	1.13775e-10	5.58516e-09
	SLC25A12	912.868	157.508	0.204018	-2.29323	1.25109e-10	6.11962e-09
	ARL4C	1977.15	8432.4	3.94979	1.98178	1.28763e-10	6.27591e-09
	SLC6A13	2.36706	106.143	13.9933	3.80666	1.30629e-10	6.34431e-09
	ICAM4	35.7627	290.66	6.31997	2.65992	1.39683e-10	6.76006e-09
	TAF5	582.588	88.7083	0.185775	-2.42837	1.42154e-10	6.85541e-09
	CTC-338M12.4	76.5303	445.531	5.08898	2.34738	1.44709e-10	6.95415e-09
	SIPA1	5850.94	1503.8	0.271377	-1.88163	1.5014e-10	7.18994e-09
	LOC401286	0.863719	75.6043	16.1375	4.01235	1.52959e-10	7.2994e-09
	FAM210B	773.503	3547.64	4.23253	2.08152	1.56985e-10	7.46552e-09
	CES3	1.67141	85.9322	14.7545	3.88308	1.67585e-10	7.942e-09
	SAPCD2	2380.44	578.858	0.262253	-1.93097	1.88146e-10	8.88567e-09
	ZDHHC13	412.534	65.7776	0.187257	-2.41691	1.89277e-10	8.90838e-09
	RGS20	328.942	1535.82	4.317	2.11003	1.93306e-10	9.06685e-09
	MANEA	644.804	125.48	0.216566	-2.20712	2.2035e-10	1.03001e-08
	SYNPO	1837.03	7083.62	3.62443	1.85775	2.21939e-10	1.0339e-08
	OR7E47P	0.375835	67.5415	16.6401	4.05659	2.30486e-10	1.07008e-08
	ZNF674-AS1	61.2868	475.323	6.55034	2.71157	2.32297e-10	1.07485e-08
	PRIM1	777.348	156.751	0.225196	-2.15075	2.37621e-10	1.09578e-08
	CENPE	1094.34	240.217	0.242712	-2.04268	2.41592e-10	1.11035e-08
	NFYC-AS1	17.6736	193.535	7.94985	2.99093	2.49626e-10	1.14344e-08
	PPM1D	830.751	3455.61	3.85499	1.94673	2.71256e-10	1.23837e-08
	HS6ST1	6321.01	26133.9	3.97437	1.99073	2.94341e-10	1.3393e-08
	HOXA7	699.354	112.184	0.180459	-2.47026	3.38753e-10	1.53628e-08
	XRCC6BP1	4060.02	1025.81	0.269123	-1.89366	3.46918e-10	1.56811e-08
	PRR30	0	60.9895	17.1708	4.10188	3.49592e-10	1.57501e-08
	GS1-259H13.2	90.917	559.855	5.13715	2.36097	3.7759e-10	1.69557e-08
	PRMT6	641.494	126.475	0.221557	-2.17425	3.89417e-10	1.74296e-08
	MIDN	3792.23	14368.8	3.53402	1.82131	4.31879e-10	1.92671e-08
	CBY3	0	60.4737	16.9531	4.08348	4.34282e-10	1.93114e-08
	SHMT1	2130.76	523.747	0.266956	-1.90533	4.38245e-10	1.94246e-08
	BLCAP	1791.94	7742.38	4.17756	2.06266	4.83242e-10	2.13499e-08
	HPD	0.863719	71.3248	15.1697	3.92312	4.93366e-10	2.17271e-08
	BLOC1S2	520.627	2621.16	4.47309	2.16127	5.34224e-10	2.33843e-08
	GREB1	18.8408	192.24	7.32951	2.87372	5.34411e-10	2.33843e-08
	C11orf91	46.0549	302.705	5.54041	2.46999	5.6529e-10	2.46567e-08
	ENO1-AS1	4.30226	115.204	11.5723	3.53261	5.77501e-10	2.51094e-08
	FLJ31356	2.85494	87.7084	12.3127	3.62207	5.82521e-10	2.52475e-08
	ETV1	574.469	105.097	0.212887	-2.23184	6.2281e-10	2.69085e-08
	FOSB	131.164	658.236	4.54853	2.1854	6.40263e-10	2.75756e-08
	MAX	1098.22	4407.65	3.93833	1.97758	6.58764e-10	2.82835e-08
	GGT1	137.259	704.735	4.51518	2.17478	6.68483e-10	2.86111e-08
	GPX8	4564.86	1212.94	0.283724	-1.81744	7.0194e-10	2.99494e-08
	FOXL1	3555.3	12905.8	3.41918	1.77365	7.34853e-10	3.12564e-08
	PAN3-AS1	31.8596	240.917	6.09428	2.60745	7.59833e-10	3.22188e-08
	ADAP2	15.7781	169.137	7.53362	2.91334	7.69303e-10	3.25197e-08
	FYB	7.3813	118.464	9.51788	3.25064	7.84481e-10	3.30592e-08
	PYY2	10.1639	165.113	9.36993	3.22804	7.8917e-10	3.31548e-08
	PAK6	34.3714	322.231	6.86357	2.77896	8.16976e-10	3.42181e-08
	CD82	2229.93	8169.75	3.44413	1.78414	8.25984e-10	3.4464e-08
	TRPV1	21.9595	194.542	6.76186	2.75742	8.27882e-10	3.4464e-08
	PPP1R15A	2193.73	10910.4	4.74902	2.24763	8.94096e-10	3.71047e-08
	SLC43A2	331.209	1362.17	3.80246	1.92693	8.96733e-10	3.71047e-08
	ARRDC4	259.529	1101.05	3.8765	1.95475	9.54188e-10	3.93631e-08
	SPICE1	396.419	60.2206	0.182539	-2.45372	1.00035e-09	4.11435e-08
	SNHG3	633.548	2924.4	4.25086	2.08775	1.02535e-09	4.20456e-08
	MAFK	2095.27	8706.95	4.00108	2.00039	1.02983e-09	4.21031e-08
	TLCD2	198.149	933.408	4.15796	2.05588	1.04691e-09	4.26739e-08
	RARA	3625.62	13812.3	3.62552	1.85819	1.09611e-09	4.4547e-08
	DSCC1	1241.35	295.868	0.260148	-1.9426	1.18827e-09	4.81494e-08
	LOC100506655	14.8583	157.004	7.5021	2.90729	1.26686e-09	5.11825e-08
	LOC100129917	2.79892	86.2049	11.8797	3.57043	1.30688e-09	5.26443e-08
	ZNF48	1124.88	267.672	0.256992	-1.9602	1.3177e-09	5.29242e-08
	DCLRE1A	523.599	103.318	0.222259	-2.16968	1.33414e-09	5.3428e-08
	PPP1R3F	351.55	1433.67	3.79975	1.92591	1.34595e-09	5.3744e-08
	PEBP4	0.863719	70.3372	14.3827	3.84626	1.35491e-09	5.39442e-08
	PBK	5648.68	1209.83	0.244233	-2.03367	1.38312e-09	5.49077e-08
	PLEKHF1	388.1	1600.49	3.77221	1.91541	1.39966e-09	5.54039e-08
	DRAM1	1639.5	6105.33	3.51479	1.81344	1.44655e-09	5.70948e-08
	SYNDIG1L	0	56.9679	15.7093	3.97355	1.52751e-09	6.0117e-08
	ITGAL	0.807695	66.7628	14.1566	3.82341	1.56518e-09	6.14231e-08
	SP110	685.462	2569.4	3.57997	1.83995	1.6947e-09	6.6316e-08
	CDCA7	1964.97	424.741	0.226442	-2.14279	1.76311e-09	6.87964e-08
	FAM102A	442.015	1741.95	3.76976	1.91447	1.77681e-09	6.91341e-08
	AGAP2	1330.07	317.339	0.256182	-1.96476	1.90516e-09	7.39181e-08
	TP53TG1	190.27	934.902	4.30269	2.10524	1.95911e-09	7.57965e-08
	SOX13	1341.14	4978.92	3.43391	1.77985	1.99519e-09	7.6975e-08
	MYOM1	2.96699	86.7085	11.7849	3.55886	2.0559e-09	7.88727e-08
	SIK1	456.698	1881.49	3.74603	1.90536	2.05586e-09	7.88727e-08
	MIS18BP1	552.234	111.902	0.229242	-2.12506	2.14018e-09	8.18767e-08
	KRT42P	232.278	1020.23	4.00199	2.00072	2.18157e-09	8.32278e-08
	OVGP1	15.6497	171.127	7.64508	2.93453	2.22585e-09	8.4469e-08
	PARD6G	283.366	1189.11	4.00613	2.00221	2.22644e-09	8.4469e-08
	RANBP6	387.703	59.9676	0.186215	-2.42496	2.33555e-09	8.83639e-08
	PRKAB1	1545.05	6118.32	3.62823	1.85927	2.34728e-09	8.85631e-08
	RTN4IP1	785.362	178.972	0.25126	-1.99275	2.42977e-09	9.14233e-08
	HIST1H1C	2484.82	9067.09	3.36753	1.75169	2.52318e-09	9.44193e-08
	LINC00115	10.5957	137.098	8.337	3.05953	2.52246e-09	9.44193e-08
	CEBPB	1647.23	6368.69	3.67638	1.87829	2.57311e-09	9.60256e-08
	SYN1	246.842	1012.3	3.77468	1.91636	2.59388e-09	9.65375e-08
	PHPT1	4252.47	17556.3	3.72318	1.89654	2.62248e-09	9.73372e-08
	NEXN-AS1	16.8892	164.802	7.12903	2.83371	2.78095e-09	1.0294e-07
	LOC100289230	36.5377	263.636	5.79069	2.53373	2.79141e-09	1.03049e-07
	ST7-AS1	33.6267	237.379	5.7567	2.52524	2.84138e-09	1.04612e-07
	DOCK9-AS2	121.416	683.564	4.87709	2.28602	2.89189e-09	1.06186e-07
	SERPINC1	15.3065	162.799	7.57434	2.92112	2.9463e-09	1.07894e-07
	DNAJB5	578.881	123.989	0.238693	-2.06677	3.45491e-09	1.26182e-07
	WDR76	1842.67	482.87	0.283145	-1.82038	3.82641e-09	1.39379e-07
	SPIN4	572.21	112.639	0.224572	-2.15475	3.84933e-09	1.39842e-07
	SLC7A5	55769	194532	3.37393	1.75443	4.03255e-09	1.46111e-07
	C8orf48	125.688	8.5689	0.114772	-3.12315	4.09418e-09	1.47952e-07
	TSC22D4	1887.09	6919.59	3.512	1.81229	4.31732e-09	1.55605e-07
	RNF152	83.9022	453.095	4.81915	2.26878	4.34348e-09	1.56137e-07
	KIAA1524	1935.8	489.715	0.279648	-1.83832	4.36725e-09	1.56581e-07
	PLEKHO2	2225.3	7673.48	3.25328	1.7019	4.44709e-09	1.58351e-07
	SLC2A12	187.425	879.354	4.12807	2.04547	4.4513e-09	1.58351e-07
	TRIM6	637.831	128.757	0.227114	-2.13851	4.43651e-09	1.58351e-07
	EGR1	69.9893	435.616	4.99191	2.31959	4.70609e-09	1.66981e-07
	LOC100132354	0	53.165	14.6301	3.87086	4.79794e-09	1.69362e-07
	MICALL1	4329.64	14802.2	3.25482	1.70258	4.78819e-09	1.69362e-07
	TRIM22	1966.28	8004.94	3.78695	1.92103	4.8334e-09	1.70175e-07
	LOC284080	8.17266	121.218	8.81819	3.14048	4.90403e-09	1.7222e-07
	RASSF7	691.044	149.985	0.235741	-2.08472	5.00083e-09	1.7517e-07
	PRKX	383.064	1462.4	3.52713	1.81849	5.06496e-09	1.76963e-07
	ARHGAP19	1448.86	380.793	0.282819	-1.82205	5.17276e-09	1.8027e-07
	SLC52A1	7.70111	111.138	8.63791	3.11068	5.19855e-09	1.80709e-07
	C15orf56	152.155	698.27	4.25385	2.08877	5.33239e-09	1.84892e-07
	MMACHC	336.176	59.2257	0.205655	-2.2817	5.45346e-09	1.88613e-07
	MBP	3.55059	84.9103	10.4908	3.39106	5.49302e-09	1.89502e-07
	LOC101927583	3.2868	85.1707	10.8088	3.43413	5.57509e-09	1.9185e-07
	ACYP2	137.721	642.636	4.24911	2.08716	5.6389e-09	1.9356e-07
	DTX4	2094.98	7313.51	3.31341	1.72832	5.83298e-09	1.99721e-07
	IL16	1.9352	76.1153	11.9095	3.57404	5.99189e-09	2.04651e-07
	MKNK2	1012.59	3626.54	3.46739	1.79385	6.07433e-09	2.0695e-07
	CHAF1B	2725.24	740.699	0.293744	-1.76737	6.2151e-09	2.11221e-07
	MFNG	4.30226	93.2507	10.1241	3.33973	6.28902e-09	2.13204e-07
	MORF4L2-AS1	3.49456	98.5669	10.8206	3.43571	6.62044e-09	2.23885e-07
	SNHG21	71.1565	407.838	4.804	2.26424	6.70556e-09	2.26205e-07
	MTFR2	438.98	82.655	0.218361	-2.19521	6.72279e-09	2.26229e-07
	FRMD8	4213.68	14340.1	3.27339	1.71079	6.97498e-09	2.34141e-07
	ARMC5	673.613	2392.39	3.33684	1.73848	7.21114e-09	2.41476e-07
	KIF15	555.384	117.687	0.238911	-2.06545	7.25084e-09	2.42213e-07
	FAM222A	824.08	3312.53	3.93884	1.97777	7.50456e-09	2.50079e-07
	TOMM40L	762.263	159.301	0.233239	-2.10012	7.56282e-09	2.51409e-07
	NPM2	0.43186	57.727	13.5165	3.75665	7.85071e-09	2.60347e-07
	CCNA2	7772.94	1941.75	0.271869	-1.87902	7.87441e-09	2.60502e-07
	DEPDC1	1760.18	468.189	0.284661	-1.81268	7.97107e-09	2.63064e-07
	SLC5A5	0.43186	56.4521	13.4756	3.75228	8.1171e-09	2.6724e-07
	BUB1B	1537.4	332.588	0.240301	-2.05708	8.1996e-09	2.69309e-07
	PRODH	15.4582	148.202	6.87159	2.78064	8.53287e-09	2.79584e-07
	MKS1	744.323	169.074	0.249393	-2.00351	9.00811e-09	2.94451e-07
	LOC100289361	36.9135	281.319	5.80612	2.53757	9.194e-09	2.99812e-07
	C10orf10	352.867	1321.69	3.4729	1.79614	9.48164e-09	3.08457e-07
	MCF2L	289.491	1105.63	3.54552	1.826	9.57429e-09	3.09999e-07
	TBC1D4	996.175	212.67	0.241358	-2.05075	9.55645e-09	3.09999e-07
	LRRC32	1136.13	4247.41	3.55786	1.83101	9.63895e-09	3.11356e-07
	HNMT	972.14	232.596	0.263886	-1.92201	9.6924e-09	3.11782e-07
	PATZ1	1662.09	449.624	0.289702	-1.78736	9.69766e-09	3.11782e-07
	IFIT1	234.292	32.266	0.177373	-2.49514	9.80374e-09	3.14454e-07
	FAM207A	1763.84	6147.05	3.24019	1.69608	1.01318e-08	3.24219e-07
	LRRTM2	54.8182	305.142	4.79915	2.26278	1.04617e-08	3.33995e-07
	CNTRL	536.937	107.33	0.223505	-2.16162	1.10904e-08	3.52252e-07
	KIF18A	668.148	141.134	0.244043	-2.0348	1.11107e-08	3.52252e-07
	SRRM2-AS1	5.74958	114.931	9.73106	3.2826	1.10954e-08	3.52252e-07
	PHGR1	1.12751	64.7655	12.3068	3.62138	1.1441e-08	3.61884e-07
	CBX4	3673.17	12909.2	3.24715	1.69917	1.16912e-08	3.68948e-07
	FLJ44511	1.50334	79.8986	12.2012	3.60895	1.17918e-08	3.71266e-07
	LINC00565	23.9507	184.728	5.97017	2.57777	1.19368e-08	3.74969e-07
	FLJ30679	0.863719	61.503	12.6482	3.66086	1.20876e-08	3.77971e-07
	LOC101927322	3.23078	78.6285	10.2814	3.36196	1.20836e-08	3.77971e-07
	KIF11	2860.43	740.736	0.28939	-1.78891	1.24275e-08	3.87716e-07
	HILS1	12.3792	139.141	7.34294	2.87636	1.26141e-08	3.92644e-07
	FAM219A	848.675	3187.61	3.62214	1.85684	1.29079e-08	4.00876e-07
	OLFM1	2390.13	7953	3.19389	1.67532	1.35895e-08	4.2109e-07
	NCKAP5L	2055.87	7263.99	3.27102	1.70974	1.37867e-08	4.26236e-07
	HIST1H2BJ	57.8156	443.011	6.44399	2.68795	1.38272e-08	4.26525e-07
	ZNF423	159.179	667.021	3.80131	1.9265	1.39003e-08	4.27817e-07
	C3AR1	101.907	4.03141	0.100071	-3.3209	1.4168e-08	4.35077e-07
	TDRD7	406.093	55.6831	0.179843	-2.47519	1.46011e-08	4.47376e-07
	PLS1	384.572	62.2449	0.202025	-2.30739	1.46352e-08	4.47418e-07
	TRAF3IP2	1638.84	5734.03	3.26759	1.70822	1.47948e-08	4.5129e-07
	NOTCH4	71.8755	405.286	4.81282	2.26688	1.50771e-08	4.58879e-07
	PDCD2L	726.54	177.682	0.267126	-1.90441	1.53728e-08	4.66842e-07
	UNG	2727.05	788.41	0.304096	-1.7174	1.60849e-08	4.87387e-07
	ACER2	4.41431	87.932	9.46571	3.24271	1.64349e-08	4.96892e-07
	RGS3	1936.77	7057.72	3.44915	1.78624	1.68582e-08	5.0857e-07
	VPREB3	8.45278	115.96	8.01316	3.00237	1.6909e-08	5.0898e-07
	TOLLIP	1902.05	6359.07	3.16718	1.6632	1.73485e-08	5.21064e-07
	SELPLG	1128.12	3781.39	3.1572	1.65864	1.84145e-08	5.51871e-07
	ZEB1	1338.7	334.143	0.274166	-1.86688	1.85035e-08	5.53329e-07
	UBALD1	1537.06	6124.27	3.7265	1.89782	1.87803e-08	5.60381e-07
	LAMB2P1	20.3604	164.833	6.13506	2.61708	1.89772e-08	5.64165e-07
	RPS6KA6	432.698	90.7448	0.238027	-2.0708	1.89895e-08	5.64165e-07
	PDGFA	2006.53	7555.31	3.4534	1.78802	1.92127e-08	5.69559e-07
	FOXS1	5466.88	17515.1	3.06454	1.61567	1.95169e-08	5.77329e-07
	ELN	10.8198	123.505	7.38752	2.88509	1.9896e-08	5.87274e-07
	UBE2T	8516.16	2441.35	0.310943	-1.68528	2.05032e-08	6.03897e-07
	SUGCT	545.257	2063.85	3.54305	1.82499	2.12152e-08	6.23527e-07
	TNFAIP1	2453.98	7981.17	3.13238	1.64726	2.13527e-08	6.26223e-07
	CDA	57.3604	351.553	5.33411	2.41525	2.17148e-08	6.34715e-07
	PLEC	6486.13	20926.1	3.06325	1.61506	2.17349e-08	6.34715e-07
	MAFF	4026.68	13093.2	3.25439	1.70239	2.23478e-08	6.51226e-07
	ZNF385A	356.616	1484.64	3.94157	1.97877	2.24695e-08	6.53379e-07
	ZFAND2A	647.68	2920.95	3.99623	1.99864	2.29652e-08	6.6638e-07
	E2F5	110.045	7.30862	0.119201	-3.06853	2.37638e-08	6.88094e-07
	ANKRD33B	1095.49	3617.79	3.16421	1.66185	2.39679e-08	6.9254e-07
	CRIP2	157.234	648.406	3.7799	1.91835	2.44226e-08	7.04193e-07
	NACAD	391.529	74.349	0.225321	-2.14995	2.4552e-08	7.06437e-07
	NCBP2-AS2	1114.99	4193.32	3.41241	1.77079	2.62838e-08	7.54682e-07
	CLN8	2410.56	8189.74	3.19725	1.67683	2.72121e-08	7.79702e-07
	AP5Z1	2843.08	9168.33	3.10324	1.63378	2.74477e-08	7.84809e-07
	IPO8	1351.11	344.517	0.284098	-1.81554	2.75589e-08	7.86348e-07
	MARCH9	13466.6	3292.8	0.265575	-1.91281	2.80322e-08	7.9819e-07
	TADA1	441.769	87.4333	0.227033	-2.13902	2.83811e-08	8.06447e-07
	FAM132A	27.9098	193.083	5.51182	2.46253	2.8549e-08	8.09538e-07
	AP3B2	15.2505	140.392	6.64271	2.73177	2.88147e-08	8.15385e-07
	FAM109A	527.154	1933.06	3.42194	1.77482	2.93325e-08	8.28324e-07
	F11R	923.38	3103.5	3.16891	1.66399	2.9617e-08	8.31218e-07
	PLTP	343.569	1228.73	3.35567	1.7466	2.95377e-08	8.31218e-07
	PSMC3IP	1221.06	315.774	0.284354	-1.81424	2.96032e-08	8.31218e-07
	TMPO	6586.01	1704.94	0.284304	-1.81449	2.99714e-08	8.39444e-07
	NUF2	2578.06	549.063	0.248067	-2.0112	3.01303e-08	8.42174e-07
	PTAFR	253.759	1018.8	3.62122	1.85648	3.09259e-08	8.62651e-07
	ORC2	797.47	181.93	0.255017	-1.97133	3.12612e-08	8.70231e-07
	NCAPH	2935.77	732.742	0.273975	-1.86788	3.4379e-08	9.55081e-07
	IL1B	866.288	2954.43	3.24624	1.69877	3.65846e-08	1.01225e-06
	LOC100996351	1.9352	66.7849	10.674	3.41603	3.65111e-08	1.01225e-06
	GCA	364.2	74.8624	0.232775	-2.10299	3.67896e-08	1.01587e-06
	DONSON	1791.86	500.694	0.298684	-1.74331	3.70758e-08	1.02171e-06
	DHRS13	659.326	164.32	0.273139	-1.8723	3.71784e-08	1.02248e-06
	ZNF367	1138.99	314.991	0.297763	-1.74776	3.81901e-08	1.0482e-06
	SOX8	1112.99	3639.06	3.08968	1.62746	3.8385e-08	1.05144e-06
	EXOC6	451.268	71.3052	0.199023	-2.32899	3.84629e-08	1.05147e-06
	CLSPN	1835.98	540.946	0.30983	-1.69045	3.87707e-08	1.05777e-06
	SFXN4	748.159	192.82	0.27858	-1.84384	3.93598e-08	1.07171e-06
	RFPL3S	1.67141	63.0065	10.8502	3.43965	4.09094e-08	1.1117e-06
	LINC00452	4.79014	91.4426	8.8775	3.15015	4.36177e-08	1.18295e-06
	CCNB1	16046.7	3793.09	0.273363	-1.87111	4.4259e-08	1.19797e-06
	FLJ32255	121.231	575.377	4.28273	2.09853	4.48589e-08	1.21181e-06
	GMNN	3582.39	1090.26	0.324234	-1.62489	4.51947e-08	1.21848e-06
	BRCA1	1593.61	463.762	0.309233	-1.69323	4.54194e-08	1.22213e-06
	LAT2	18.3692	150.219	6.08863	2.60612	4.65885e-08	1.25113e-06
	ZNF711	231.211	21.41	0.141208	-2.82411	4.73119e-08	1.26807e-06
	EXOSC8	3484.52	1049.8	0.323933	-1.62623	4.8207e-08	1.28954e-06
	FANCL	1274.92	357.12	0.302598	-1.72453	4.8743e-08	1.30133e-06
	LYNX1	2172.2	7211.94	3.1208	1.64192	5.16814e-08	1.3771e-06
	CHPF2	3230.41	10415.8	3.02356	1.59625	5.23195e-08	1.39139e-06
	FLYWCH1	2172.16	6860.17	2.99542	1.58276	5.40623e-08	1.43496e-06
	KIAA0930	11781.8	38621.4	3.13921	1.6504	5.44125e-08	1.44146e-06
	ST3GAL1	2526.23	7928.12	2.97577	1.57326	5.53939e-08	1.46462e-06
	SPDYC	2.04725	64.2643	10.2836	3.36227	5.57546e-08	1.47132e-06
	ESRRB	9.48458	110.671	7.27803	2.86355	5.6189e-08	1.47993e-06
	GPR56	812.254	2880.16	3.28151	1.71436	5.67942e-08	1.493e-06
	RFC4	2751.61	798.677	0.315387	-1.6648	5.88338e-08	1.54365e-06
	FADS3	7290.87	22774.4	2.95403	1.56269	6.18786e-08	1.62044e-06
	ASPM	756.495	192.041	0.280877	-1.83199	6.27592e-08	1.64036e-06
	DDN	45.0302	257.05	4.81356	2.2671	6.43499e-08	1.67873e-06
	C1orf68	0	45.3651	12.2503	3.61474	6.52911e-08	1.70005e-06
	SCNN1G	2.79892	70.2955	9.63933	3.26893	6.55586e-08	1.70378e-06
	TOLLIP-AS1	6.83739	94.7689	7.87846	2.97791	6.57344e-08	1.70511e-06
	LMNB1	7724.04	1966.81	0.28622	-1.8048	6.68921e-08	1.73186e-06
	AMIGO2	883.343	239.612	0.289807	-1.78683	6.73625e-08	1.74075e-06
	NUAK2	160.857	724.428	3.93978	1.97811	6.84171e-08	1.76467e-06
	C7orf61	53.6183	323.368	5.03608	2.3323	6.90357e-08	1.77728e-06
	TMEM31	1.55936	64.5321	10.5806	3.40335	7.03528e-08	1.80779e-06
	ANP32A	11982	3876.27	0.340924	-1.55248	7.20394e-08	1.84631e-06
	DDB2	4973.4	16000.9	3.12929	1.64583	7.21215e-08	1.84631e-06
	GPR37L1	11.156	116.194	6.9735	2.80188	7.49566e-08	1.91531e-06
	TAF9B	2021.82	613.983	0.322658	-1.63192	7.53393e-08	1.9215e-06
	CHAC1	37.7049	234.377	5.12335	2.35709	7.59788e-08	1.93421e-06
	JADE1	2582.11	780.33	0.324894	-1.62196	7.67009e-08	1.94897e-06
	PKD2L1	0.375835	50.9245	11.6013	3.53621	7.77254e-08	1.97135e-06
	FAM90A1	2.31104	68.8018	9.99108	3.32064	7.88007e-08	1.99493e-06
	BUB1	2181.77	461.087	0.244958	-2.02939	7.99424e-08	2.0201e-06
	ARHGAP4	6.94944	94.0049	7.81189	2.96567	8.15514e-08	2.05696e-06
	PPP1R10	1644.51	5340.5	3.05202	1.60977	8.17655e-08	2.05857e-06
	ANP32E	9371.94	3024.75	0.341322	-1.55079	8.30002e-08	2.0798e-06
	KLHL36	306.455	1157.8	3.52074	1.81588	8.30643e-08	2.0798e-06
	PDE6C	0	45.1218	12.0308	3.58866	8.29821e-08	2.0798e-06
	C11orf96	7262.99	28875.3	3.64604	1.86633	8.49407e-08	2.1229e-06
	CLIC5	55.9387	284.017	4.36926	2.12739	8.54322e-08	2.12742e-06
	KLLN	6.57361	92.241	7.94175	2.98946	8.53056e-08	2.12742e-06
	CCDC116	13.1145	162.588	7.46414	2.89998	8.62367e-08	2.13967e-06
	PAX6	272.522	50.669	0.214538	-2.22069	8.62175e-08	2.13967e-06
	FAM26E	405.897	75.8402	0.221083	-2.17734	8.70578e-08	2.14837e-06
	MSH2	1222.15	272.141	0.257518	-1.95726	8.67855e-08	2.14837e-06
	SASS6	276.612	52.4378	0.2192	-2.18968	8.69012e-08	2.14837e-06
	DNHD1	51.9399	291.382	4.62726	2.21016	8.77129e-08	2.16064e-06
	CENPF	3567.65	1101.86	0.33024	-1.59841	8.81479e-08	2.16746e-06
	HEXIM2	643.789	159.812	0.26815	-1.89889	8.87882e-08	2.17929e-06
	TNFAIP8L1	1542.95	458.709	0.316166	-1.66125	8.96902e-08	2.19749e-06
	LOC100506082	0	44.3603	11.9049	3.57349	9.64618e-08	2.35918e-06
	TCTA	532.855	1953.73	3.60382	1.84953	1.00189e-07	2.44597e-06
	NFIB	1307.89	390.754	0.312646	-1.6774	1.05918e-07	2.58124e-06
	ZNF596	126.857	508.874	3.66489	1.87377	1.0653e-07	2.59154e-06
	BAMBI	1152.38	3722.68	2.9974	1.58371	1.07518e-07	2.61093e-06
	NCAPG	2083.61	505.305	0.283533	-1.81841	1.07918e-07	2.616e-06
	PRKCG	1.55936	61.2499	10.2744	3.36098	1.09533e-07	2.65046e-06
	INSIG2	339.97	66.5318	0.231417	-2.11143	1.12706e-07	2.71763e-06
	SPTBN5	57.1619	313.32	4.51777	2.17561	1.12669e-07	2.71763e-06
	ARID3A	264.21	968.055	3.37888	1.75655	1.13505e-07	2.7321e-06
	CALR	112608	356053	2.96917	1.57006	1.13764e-07	2.73354e-06
	KRTAP20-2	7.36497	96.5034	7.65779	2.93693	1.18433e-07	2.84074e-06
	GPR132	0.807695	51.1579	10.8457	3.43905	1.19318e-07	2.85696e-06
	MED26	555.351	1806.95	3.05776	1.61247	1.21758e-07	2.91029e-06
	TRIT1	1073.13	291.556	0.295817	-1.75723	1.24618e-07	2.97346e-06
	CCNK	2056.33	6267.18	2.90616	1.53911	1.24924e-07	2.97559e-06
	ANKDD1A	129.831	525.425	3.66649	1.8744	1.25857e-07	2.99215e-06
	HIST1H2BO	39.0401	227.29	4.92358	2.29971	1.26057e-07	2.99215e-06
	BEND3	348.614	75.3611	0.24609	-2.02274	1.26686e-07	3.00188e-06
	KCNJ2	8062.31	2151.08	0.31182	-1.68122	1.28187e-07	3.03221e-06
	ZNF561	276.764	976.024	3.29386	1.71978	1.29438e-07	3.05652e-06
	OR52N4	0	43.3432	11.6345	3.54033	1.32014e-07	3.11199e-06
	IL17D	251.774	898.305	3.28541	1.71607	1.32331e-07	3.11409e-06
	COL27A1	87.5882	381.191	3.97297	1.99022	1.32679e-07	3.11694e-06
	PSORS1C1	33.7224	223.052	5.27969	2.40045	1.33465e-07	3.13004e-06
	ARHGAP11A	2792.37	851.992	0.324682	-1.6229	1.34423e-07	3.14711e-06
	NPC1L1	0	43.3506	11.6134	3.53772	1.34959e-07	3.15425e-06
	CLDN6	2.85494	69.7919	9.27064	3.21267	1.36543e-07	3.18585e-06
	LHX3	0.75167	51.9146	10.823	3.43603	1.38227e-07	3.21965e-06
	CRISPLD1	755.351	153.174	0.230373	-2.11795	1.39484e-07	3.24342e-06
	DCK	1524.26	455.353	0.318491	-1.65068	1.41372e-07	3.28175e-06
	LINC00842	31.6752	195.783	5.07733	2.34407	1.42729e-07	3.30765e-06
	DUSP5	1921.77	5825.37	2.89723	1.53468	1.45841e-07	3.37406e-06
	RBM38	1170.64	4011.05	3.23773	1.69498	1.47693e-07	3.41113e-06
	DGKA	687.241	2207.51	3.05497	1.61116	1.49892e-07	3.45028e-06
	LRRC45	2761.68	862.275	0.327811	-1.60906	1.49651e-07	3.45028e-06
	LAD1	0.375835	47.893	11.0938	3.47168	1.50681e-07	3.46264e-06
	CACNB3	537.484	122.232	0.259817	-1.94443	1.51881e-07	3.48435e-06
	ATL1	254.214	37.5528	0.199394	-2.3263	1.54098e-07	3.52931e-06
	RFC5	2123.34	588.11	0.298894	-1.74229	1.55632e-07	3.55848e-06
	CREBRF	123.89	499.762	3.68406	1.8813	1.57304e-07	3.59072e-06
	PNRC1	339.68	1182.88	3.23697	1.69465	1.58778e-07	3.61834e-06
	SCN4B	12.643	118.424	6.39233	2.67634	1.59108e-07	3.61984e-06
	BRIP1	792.934	215.977	0.29748	-1.74914	1.64582e-07	3.73818e-06
	FETUB	0.43186	47.8734	11.002	3.4597	1.65239e-07	3.74689e-06
	USP12-AS2	0.807695	50.1556	10.5838	3.40378	1.69474e-07	3.83655e-06
	KLHL21	1135.94	3522.48	2.92184	1.54688	1.71076e-07	3.86642e-06
	SSSCA1-AS1	2.47911	64.0113	9.34963	3.22491	1.72873e-07	3.90062e-06
	AVIL	64.7253	352.568	4.80073	2.26325	1.73862e-07	3.91648e-06
	SDC4	9873.2	31778.7	2.95888	1.56505	1.77101e-07	3.98289e-06
	H2AFY2	2700.64	856.863	0.336587	-1.57095	1.77828e-07	3.99268e-06
	SKI	2104.94	6303.19	2.95693	1.5641	1.80035e-07	4.03561e-06
	SNHG9	56.4266	300.479	4.36777	2.1269	1.80408e-07	4.03737e-06
	HTR3C	52.6682	269.387	4.36879	2.12723	1.81543e-07	4.05613e-06
	C1orf112	969.427	277.005	0.310715	-1.68633	1.88387e-07	4.18746e-06
	CXCR6	1.18353	53.1724	10.1744	3.34687	1.88248e-07	4.18746e-06
	SCRN3	549.151	136.825	0.274554	-1.86484	1.87871e-07	4.18746e-06
	ZNF512B	2333.96	736.653	0.335044	-1.57758	1.88644e-07	4.18746e-06
	PRKAA2	226.614	33.2659	0.196319	-2.34873	1.97306e-07	4.37265e-06
	CEP55	4455.33	1421.85	0.332509	-1.58854	1.99219e-07	4.40082e-06
	TRAPPC6A	581.687	1979.84	3.08474	1.62515	1.99081e-07	4.40082e-06
	DSN1	1806.72	566.309	0.332817	-1.5872	2.01019e-07	4.42629e-06
	PAQR4	2539.7	654.56	0.287928	-1.79622	2.00907e-07	4.42629e-06
	CDCA3	7148.79	2359.64	0.346592	-1.52869	2.02956e-07	4.45085e-06
	DLGAP2	0.863719	53.1675	10.5042	3.39289	2.03169e-07	4.45085e-06
	JARID2-AS1	1.18353	53.9413	10.1107	3.33781	2.03434e-07	4.45085e-06
	SLC30A1	207.164	776.721	3.51825	1.81486	2.02827e-07	4.45085e-06
	BARD1	803.206	223.106	0.288987	-1.79092	2.05949e-07	4.49869e-06
	SLC38A1	1706.57	533.635	0.32666	-1.61414	2.07917e-07	4.53444e-06
	CELF5	39.4253	225.106	4.62232	2.20862	2.09276e-07	4.55683e-06
	CASD1	301.728	60.2231	0.236736	-2.07865	2.10582e-07	4.57799e-06
	LMCD1	542.176	123.981	0.262083	-1.93191	2.11565e-07	4.59206e-06
	PHLDB3	507.013	1666.87	3.12746	1.64499	2.2352e-07	4.84387e-06
	LOC101928053	1.55936	57.4642	9.79252	3.29168	2.24857e-07	4.86515e-06
	ZMYM3	850.724	225.798	0.294056	-1.76584	2.25977e-07	4.88167e-06
	ZNFX1	933.034	2862.38	2.90701	1.53954	2.2744e-07	4.90554e-06
	SH3D19	896.877	255.502	0.305229	-1.71204	2.30798e-07	4.97015e-06
	CHST8	87.901	405.767	4.08617	2.03075	2.32046e-07	4.98917e-06
	C4orf27	1605.95	496.237	0.330416	-1.59765	2.34953e-07	5.03051e-06
	NEIL3	465.092	93.2261	0.235998	-2.08316	2.3438e-07	5.03051e-06
	PNPT1	1088.31	305.675	0.305817	-1.70926	2.35071e-07	5.03051e-06
	CEACAM19	257.732	1021.35	3.53614	1.82218	2.37677e-07	5.06377e-06
	HEYL	7176.51	21408.9	2.83531	1.50351	2.38104e-07	5.06377e-06
	KCTD12	430.816	98.7905	0.262422	-1.93004	2.37948e-07	5.06377e-06
	MDM1	369.023	76.872	0.241805	-2.04808	2.37674e-07	5.06377e-06
	PANK3	548.453	1801.3	3.06559	1.61616	2.40444e-07	5.10561e-06
	FBXO21	1338.08	372.217	0.306816	-1.70455	2.44557e-07	5.1849e-06
	KIF20A	4879.39	1287.49	0.28553	-1.80829	2.49668e-07	5.28508e-06
	TRMT11	628.263	147.408	0.265812	-1.91152	2.51442e-07	5.31443e-06
	ADRB2	753.096	2365.71	2.95097	1.56119	2.55097e-07	5.38337e-06
	PLK1	9779.46	2627.41	0.290307	-1.78435	2.57468e-07	5.42506e-06
	RPS19	46118.4	142786	2.85252	1.51224	2.58548e-07	5.43944e-06
	ZC4H2	316.679	67.7872	0.246413	-2.02085	2.7767e-07	5.83277e-06
	LAMC2	22.2396	157.992	5.38272	2.42834	2.8078e-07	5.88907e-06
	PAX8	6.82106	106.094	8.07668	3.01376	2.83568e-07	5.93845e-06
	ANK1	264.69	905.918	3.17209	1.66543	2.84613e-07	5.95123e-06
	PADI1	168.47	613.315	3.35307	1.74548	2.92328e-07	6.10324e-06
	CEP85L	150.304	577.226	3.44134	1.78297	2.99527e-07	6.24403e-06
	PLAC8	1767.36	5293.81	2.84984	1.51088	3.01129e-07	6.26787e-06
	CHD5	36.8015	211.193	4.72218	2.23945	3.07187e-07	6.38323e-06
	SGMS2	410.636	99.5471	0.270862	-1.88437	3.07603e-07	6.38323e-06
	TTK	1047.55	259.31	0.283958	-1.81625	3.15316e-07	6.53338e-06
	INHA	1.12751	57.7148	10.0181	3.32454	3.21279e-07	6.64688e-06
	XPC	1734.59	6055.2	3.21601	1.68527	3.26747e-07	6.74982e-06
	YEATS2	1677.09	483.762	0.305671	-1.70995	3.33054e-07	6.86973e-06
	PNMA2	1139.96	332.34	0.309111	-1.6938	3.35738e-07	6.91469e-06
	BRE-AS1	10.9156	123.008	6.83515	2.77297	3.36876e-07	6.9277e-06
	PAGR1	2531.47	753.842	0.321214	-1.63839	3.48432e-07	7.15462e-06
	PSIP1	2143.64	635.86	0.326378	-1.61538	3.50173e-07	7.1796e-06
	MAP9	1051.63	315.366	0.323346	-1.62885	3.53425e-07	7.23545e-06
	LIF	774.192	2505.35	3.16293	1.66126	3.59861e-07	7.35621e-06
	KCTD5	2686.24	8174.62	2.97021	1.57056	3.61432e-07	7.3773e-06
	HJURP	4819.24	1539.43	0.339704	-1.55765	3.65643e-07	7.45216e-06
	EXO1	1188.32	342.98	0.314716	-1.66788	3.69306e-07	7.51562e-06
	MARCH4	2242.01	6828.99	3.02786	1.5983	3.73117e-07	7.58192e-06
	ZNF678	87.887	6.04835	0.132795	-2.91273	3.80493e-07	7.72035e-06
	LOC286059	35.1067	197.576	4.62645	2.20991	3.81742e-07	7.73423e-06
	ABCB9	881.361	2708.22	2.8951	1.53361	3.83929e-07	7.7556e-06
	TRIM35	657.137	2040.04	2.93814	1.5549	3.83818e-07	7.7556e-06
	APC2	12.1154	110.388	6.17494	2.62643	3.86266e-07	7.79131e-06
	KCTD3	1519.38	472.715	0.329454	-1.60185	3.89772e-07	7.85046e-06
	SAC3D1	4845.68	14621.9	2.81379	1.49251	4.02832e-07	8.10159e-06
	FIGNL1	843.99	215.186	0.282935	-1.82146	4.14827e-07	8.33061e-06
	LRRC8A	6798.22	19486.1	2.76266	1.46606	4.16091e-07	8.34375e-06
	BIN1	7341.42	21036.1	2.73322	1.4506	4.20772e-07	8.42528e-06
	FENDRR	864.934	2987.03	3.29042	1.71827	4.22687e-07	8.44488e-06
	PTP4A1	1623.01	5547.95	3.25972	1.70475	4.22984e-07	8.44488e-06
	EFNA1	604.356	1856.69	2.90376	1.53792	4.23976e-07	8.45237e-06
	SYTL4	561.079	153.007	0.293768	-1.76725	4.32181e-07	8.60342e-06
	AKR1B10	54.9793	265.857	4.14994	2.05309	4.36222e-07	8.64762e-06
	FLJ10038	158.763	575.099	3.32332	1.73262	4.36295e-07	8.64762e-06
	RPUSD3	1830.81	591.696	0.342473	-1.54594	4.36167e-07	8.64762e-06
	CTRC	1.9352	64.2839	9.20819	3.20292	4.37454e-07	8.65805e-06
	GEMIN2	941.847	280.504	0.321465	-1.63727	4.43107e-07	8.75728e-06
	NMI	1521.84	472.567	0.335229	-1.57678	4.4882e-07	8.85741e-06
	ISCU	1660.39	5210.44	3.06374	1.61529	4.53924e-07	8.94525e-06
	UBOX5	740.831	2273.95	2.86903	1.52057	4.57069e-07	8.99428e-06
	RAD51AP1	2012	603.587	0.328774	-1.60483	4.63563e-07	9.10897e-06
	LINC01265	0.43186	44.1048	10.2023	3.35082	4.65221e-07	9.12847e-06
	BCAM	27593	79868.7	2.75077	1.45984	4.70496e-07	9.21877e-06
	PVRL1	1301.57	3989.06	2.97941	1.57503	4.7127e-07	9.22074e-06
	LOC730183	13.3713	118.962	6.23199	2.63969	5.20772e-07	1.01747e-05
	TMEM71	144.024	19.4053	0.18296	-2.4504	5.28253e-07	1.03062e-05
	ARHGEF37	46.3981	232.336	4.23762	2.08325	5.30098e-07	1.03153e-05
	ZNF488	219.135	751.374	3.29849	1.72181	5.30227e-07	1.03153e-05
	LOC102723354	6.29348	83.9251	7.26407	2.86078	5.36927e-07	1.04309e-05
	TTC27	936.445	250.225	0.296868	-1.75211	5.57835e-07	1.08217e-05
	GTPBP8	622.66	173.38	0.304021	-1.71775	5.71696e-07	1.10749e-05
	CCDC112	495.563	111.887	0.26449	-1.91872	5.73233e-07	1.1089e-05
	CDC42EP4	12269.1	34937.1	2.71663	1.44182	5.99846e-07	1.15874e-05
	TRIM59	1961.72	648.674	0.350063	-1.51431	6.10209e-07	1.1771e-05
	LRRC40	582.637	136.847	0.276454	-1.85489	6.12419e-07	1.1797e-05
	PLK2	4884.11	15447.8	3.02095	1.595	6.14348e-07	1.18176e-05
	USP13	2042.83	638.661	0.340881	-1.55266	6.17468e-07	1.18609e-05
	SKAP1	99.7947	393.671	3.55908	1.83151	6.22539e-07	1.19416e-05
	FOLR4	0	39.0661	10.3058	3.36538	6.27467e-07	1.20193e-05
	KIF14	816.92	218.517	0.304464	-1.71566	6.38068e-07	1.22053e-05
	PLEKHG3	3439.57	10305.9	2.82551	1.49851	6.50875e-07	1.24329e-05
	AMZ1	26.9574	176.942	5.02733	2.32979	6.62861e-07	1.26442e-05
	MKI67	5502.5	1862.12	0.354282	-1.49703	6.64993e-07	1.26672e-05
	FOXD2	1267.67	3701.3	2.77545	1.47272	7.09072e-07	1.34881e-05
	ALOX5	3.92642	68.0402	7.85718	2.97401	7.17092e-07	1.36218e-05
	INHBA	2498.93	7066.39	2.70963	1.4381	7.20042e-07	1.36423e-05
	MFSD6	278.589	58.98	0.244353	-2.03296	7.20233e-07	1.36423e-05
	SLC8A3	245.969	819.949	3.08181	1.62378	7.21161e-07	1.36423e-05
	FOXF1	5270.69	14778.4	2.68499	1.42492	7.23434e-07	1.36664e-05
	LINC00663	7.32528	85.7013	6.79694	2.76489	7.30874e-07	1.37879e-05
	CPNE7	2.85494	60.4859	8.28632	3.05073	7.35291e-07	1.38522e-05
	POLQ	501.658	135.078	0.29637	-1.75453	7.3738e-07	1.38534e-05
	PRR5	394.23	1421.34	3.27606	1.71196	7.37051e-07	1.38534e-05
	ATG4C	410.458	104.325	0.282711	-1.8226	7.53812e-07	1.41427e-05
	SIX4	264.532	56.199	0.247697	-2.01335	7.55818e-07	1.4161e-05
	RASL11A	48.0135	234.38	4.1488	2.0527	7.64381e-07	1.43019e-05
	FAM221A	153.404	21.1717	0.187027	-2.41868	7.84678e-07	1.4651e-05
	LOC100287036	17.8487	135.066	5.62277	2.49128	7.85181e-07	1.4651e-05
	IFT81	286.902	63.0114	0.255105	-1.97084	7.92425e-07	1.47661e-05
	DEPDC1B	651.523	177.871	0.29167	-1.77759	7.9779e-07	1.48458e-05
	PRKD1	583.333	152.196	0.28915	-1.79011	8.10123e-07	1.50549e-05
	PLK4	802.356	237.625	0.322441	-1.63289	8.13584e-07	1.50987e-05
	IMPA1	1016.27	307.429	0.325038	-1.62132	8.15352e-07	1.5111e-05
	DCUN1D3	442.194	1395.66	2.92053	1.54623	8.16568e-07	1.51131e-05
	UBXN2B	343.529	74.1033	0.24987	-2.00075	8.19451e-07	1.5146e-05
	ACAN	1.23955	48.9002	9.14911	3.19363	8.2372e-07	1.52044e-05
	ESCO2	859.235	251.53	0.321703	-1.6362	8.35771e-07	1.54061e-05
	KISS1	39399.4	109419	2.64934	1.40563	8.58884e-07	1.58108e-05
	KCNQ1	7.68478	100.564	7.1527	2.83849	8.60128e-07	1.58125e-05
	RRM2	26975.5	8639.01	0.347322	-1.52565	8.753e-07	1.60699e-05
	EVI2B	496.037	112.865	0.2536	-1.97937	8.7758e-07	1.60901e-05
	ADM2	38.0013	199.342	4.35705	2.12335	8.90927e-07	1.6313e-05
	NGLY1	1087.86	326.834	0.324363	-1.62432	8.92966e-07	1.63285e-05
	SOX11	290.268	58.7122	0.241995	-2.04695	9.11509e-07	1.66454e-05
	C14orf93	402.44	99.5349	0.277601	-1.84892	9.2101e-07	1.67519e-05
	MIR181A2HG	10.1639	103.333	6.38824	2.67542	9.20067e-07	1.67519e-05
	PDGFRA	289.173	59.2207	0.24567	-2.02521	9.18895e-07	1.67519e-05
	WDHD1	622.866	166.074	0.298743	-1.74302	9.24179e-07	1.67872e-05
	EBI3	786.681	2358.53	2.84124	1.50652	9.29993e-07	1.68589e-05
	OIP5	915.284	281.486	0.331278	-1.59388	9.30588e-07	1.68589e-05
	SYT11	202.743	37.0565	0.224823	-2.15314	9.32666e-07	1.68742e-05
	RFPL1S	0.75167	48.6545	9.40341	3.23318	9.40054e-07	1.69855e-05
	C11orf94	2.04725	54.1845	8.55995	3.0976	9.58743e-07	1.72669e-05
	PHLDB2	705.061	172.862	0.281336	-1.82963	9.5756e-07	1.72669e-05
	POLD3	667.798	196.591	0.318503	-1.65062	9.59414e-07	1.72669e-05
	FAM131B	22.8629	151.717	5.09368	2.34871	9.66401e-07	1.73699e-05
	ATP6V0A1	726.122	2159.85	2.83967	1.50572	9.70248e-07	1.74161e-05
	PCBP1-AS1	13.2826	110.863	5.80663	2.5377	9.77903e-07	1.75306e-05
	LRRC56	3.17475	62.2523	7.98402	2.99711	9.80353e-07	1.75515e-05
	ITIH5	208.602	702.387	3.14174	1.65156	9.91666e-07	1.77309e-05
	ZNF408	844.485	2626.65	2.84264	1.50723	1.00428e-06	1.7933e-05
	C17orf103	167.235	713.221	4.01597	2.00575	1.00819e-06	1.79561e-05
	CCNB2	4549.29	1362	0.327229	-1.61163	1.00706e-06	1.79561e-05
	PIGB	243.877	50.1531	0.244116	-2.03436	1.04508e-06	1.85888e-05
	TGFA	104.421	437.992	3.8728	1.95338	1.05845e-06	1.88022e-05
	SHCBP1	8761.97	2467.84	0.319281	-1.6471	1.07026e-06	1.89875e-05
	KIF16B	279.967	60.2255	0.251604	-1.99077	1.09602e-06	1.94192e-05
	GAST	0	37.5553	9.83559	3.29801	1.10647e-06	1.95792e-05
	TCTEX1D4	1.18353	48.3966	8.96439	3.16421	1.11905e-06	1.97761e-05
	MAD2L1	3437.63	1196.82	0.367348	-1.44478	1.12756e-06	1.99009e-05
	WDR25	766.764	2243.83	2.79998	1.48542	1.14412e-06	2.01671e-05
	PIP5K1C	2374.32	7293.4	3.08965	1.62744	1.15703e-06	2.03684e-05
	NEFL	256.796	945.513	3.47563	1.79727	1.16633e-06	2.05059e-05
	ZFYVE1	762.153	2216.29	2.76285	1.46616	1.18429e-06	2.07948e-05
	BCL9L	790.007	2278.85	2.75456	1.46182	1.19711e-06	2.0993e-05
	MUC20	11.4758	101.837	5.90689	2.5624	1.20214e-06	2.10006e-05
	REEP1	187.752	32.5166	0.213524	-2.22753	1.2007e-06	2.10006e-05
	TRIM14	839.622	255.269	0.330093	-1.59906	1.20063e-06	2.10006e-05
	MYT1	7.43733	83.9447	6.59994	2.72245	1.2167e-06	2.12279e-05
	HIST2H2BE	213.642	739.63	3.2807	1.714	1.23838e-06	2.15787e-05
	CNKSR2	86.1922	7.05804	0.146948	-2.76663	1.24472e-06	2.16616e-05
	INSL3	26.7426	161.571	4.94818	2.3069	1.25803e-06	2.18654e-05
	PMEPA1	1435.82	4121.99	2.71691	1.44197	1.29804e-06	2.25322e-05
	BAK1	822.605	2718.57	3.18714	1.67226	1.30637e-06	2.26482e-05
	RPS27L	3363.93	10412	2.90159	1.53684	1.31762e-06	2.28143e-05
	HLTF	985.745	251.989	0.293421	-1.76896	1.32723e-06	2.29517e-05
	HSD52	0.43186	41.0782	9.39823	3.23239	1.33108e-06	2.29604e-05
	ZSWIM4	320.585	1008.98	2.99332	1.58175	1.32954e-06	2.29604e-05
	LOC100288911	421.68	1272.71	2.84137	1.50659	1.34872e-06	2.32352e-05
	MTRNR2L1	64.2397	301.243	3.882	1.9568	1.35532e-06	2.33196e-05
	LRCH2	220.08	33.7646	0.207859	-2.26632	1.36068e-06	2.33694e-05
	SDK2	39.6167	200.089	4.22006	2.07726	1.36162e-06	2.33694e-05
	DYRK3	347.997	1111.06	2.98382	1.57716	1.39265e-06	2.3872e-05
	GIT1	2008.07	5883.9	2.77954	1.47485	1.41672e-06	2.4224e-05
	P2RX7	149.122	18.3956	0.184269	-2.44012	1.41559e-06	2.4224e-05
	C19orf38	11.6275	101.058	5.8277	2.54293	1.41944e-06	2.42402e-05
	SLC43A1	265.148	59.4811	0.258371	-1.95248	1.4221e-06	2.42554e-05
	SH3BP2	362.781	1179.86	2.98511	1.57778	1.45587e-06	2.48005e-05
	LRRC8B	228.68	46.1266	0.237597	-2.07341	1.4615e-06	2.48655e-05
	DOK7	1.12751	53.6883	8.95083	3.16202	1.49797e-06	2.54544e-05
	GPR180	581.354	168.106	0.313864	-1.67179	1.49994e-06	2.54562e-05
	ANKRD32	332.093	81.1589	0.277757	-1.8481	1.50186e-06	2.54573e-05
	SLC25A40	572.677	166.573	0.316209	-1.66105	1.50796e-06	2.55291e-05
	B3GALNT1	728.06	220.755	0.327449	-1.61066	1.54953e-06	2.61681e-05
	RPL32P3	84.4158	358.189	3.64556	1.86614	1.54919e-06	2.61681e-05
	BEND5	62.545	2.26752	0.1221	-3.03387	1.57662e-06	2.65601e-05
	FANCF	332.775	82.1441	0.277575	-1.84905	1.57566e-06	2.65601e-05
	SGOL1	1347.51	448.125	0.354509	-1.49611	1.58875e-06	2.67316e-05
	GJC1	4012.91	1439.48	0.373721	-1.41997	1.61629e-06	2.71616e-05
	GAMT	3553.86	9811.98	2.61494	1.38678	1.62949e-06	2.73498e-05
	ALB	6.2538	80.6405	6.9626	2.79963	1.63505e-06	2.74096e-05
	PLEKHA4	941.179	285.611	0.316378	-1.66028	1.64381e-06	2.75227e-05
	RCSD1	71.3153	295.819	3.73571	1.90138	1.65612e-06	2.7695e-05
	DMWD	1248.18	3575.32	2.73955	1.45394	1.68025e-06	2.80642e-05
	VGLL3	413.605	110.865	0.296579	-1.75351	1.70354e-06	2.84186e-05
	CLDN4	9.14843	100.083	6.2835	2.65157	1.72665e-06	2.87691e-05
	RTKN2	482.483	131.801	0.303088	-1.72219	1.7512e-06	2.91426e-05
	F2RL2	121.672	445.726	3.29023	1.71819	1.77222e-06	2.94567e-05
	DYNC2LI1	379.49	98.0387	0.290319	-1.78429	1.80642e-06	2.98082e-05
	FNDC3A	1181.23	379.26	0.344025	-1.53941	1.8009e-06	2.98082e-05
	MAP1LC3B	3722.05	10421.4	2.71641	1.4417	1.80126e-06	2.98082e-05
	TPRA1	4143.79	11711	2.68027	1.42238	1.79765e-06	2.98082e-05
	VAV2	3554.55	9700.95	2.6003	1.37868	1.80518e-06	2.98082e-05
	ZFAND1	579.528	165.588	0.311499	-1.6827	1.80272e-06	2.98082e-05
	ABHD8	249.151	49.4038	0.236885	-2.07774	1.83817e-06	3.02673e-05
	NDC80	3012.8	914.917	0.344988	-1.53538	1.83867e-06	3.02673e-05
	MPV17L2	1635.16	4744.5	2.78218	1.47622	1.85218e-06	3.04167e-05
	NADSYN1	1904.63	5315.47	2.71321	1.44	1.85156e-06	3.04167e-05
	TG	4.90219	69.0671	7.02996	2.81352	1.89503e-06	3.1083e-05
	STK17A	2380.46	6731.89	2.70372	1.43495	1.89934e-06	3.11165e-05
	TFAP2A-AS1	30.3796	188.523	4.88818	2.2893	1.94826e-06	3.18797e-05
	WAS	33.9068	179.689	4.33952	2.11753	1.96985e-06	3.21946e-05
	PODNL1	18.0891	125.011	5.09538	2.34919	1.98704e-06	3.24369e-05
	ACP2	3184.92	1132.95	0.376208	-1.4104	2.00731e-06	3.27287e-05
	MCM3	10581.3	3444.74	0.355901	-1.49045	2.01832e-06	3.2869e-05
	ZBED5	762.753	212.955	0.31521	-1.66562	2.02368e-06	3.29172e-05
	CCDC109B	804.763	238.153	0.325617	-1.61875	2.02666e-06	3.29266e-05
	C1orf210	0	35.7865	9.34067	3.22353	2.03507e-06	3.30241e-05
	TRIM47	1400.12	471.343	0.353405	-1.50061	2.042e-06	3.30974e-05
	APPL1	1184.74	384.345	0.350099	-1.51417	2.05655e-06	3.32937e-05
	USP51	104.041	11.8461	0.172426	-2.53595	2.06781e-06	3.34365e-05
	EVI2A	467.613	125.733	0.295572	-1.75842	2.07985e-06	3.35915e-05
	RPL23P8	1300.74	4028.09	2.86411	1.51808	2.0906e-06	3.37254e-05
	MAP1A	5745.61	15433.5	2.57667	1.36551	2.1068e-06	3.3867e-05
	MOB2	740.638	2405.81	3.00969	1.58961	2.10404e-06	3.3867e-05
	PGBD1	724.68	216.719	0.325319	-1.62007	2.10533e-06	3.3867e-05
	PICK1	766.119	241.776	0.321318	-1.63793	2.15891e-06	3.46641e-05
	MAPK8IP3	610.655	1899.03	2.94869	1.56008	2.16436e-06	3.47109e-05
	MSH6	1390.33	417.845	0.334875	-1.5783	2.17643e-06	3.48636e-05
	CHN1	1018.86	332.676	0.349678	-1.5159	2.19423e-06	3.50667e-05
	RHOBTB2	2307.57	795.783	0.368894	-1.43872	2.19196e-06	3.50667e-05
	RAB6B	616.61	185.229	0.325964	-1.61722	2.20465e-06	3.51922e-05
	DLGAP1-AS2	24.7421	161.057	4.93868	2.30413	2.21171e-06	3.52638e-05
	MAGI2-AS3	286.445	60.9822	0.258288	-1.95295	2.21966e-06	3.53493e-05
	TGFB1I1	10958.8	4069.33	0.387918	-1.36618	2.23796e-06	3.55995e-05
	GNL1	7462.08	2756.67	0.384292	-1.37973	2.2453e-06	3.56748e-05
	CCRN4L	466.164	1372.82	2.81038	1.49076	2.24867e-06	3.56869e-05
	NDRG4	277.623	65.2814	0.267171	-1.90417	2.26069e-06	3.58361e-05
	MAB21L2	30.8278	189.051	4.69162	2.23009	2.26802e-06	3.59108e-05
	NMU	392.075	101.8	0.289566	-1.78804	2.27853e-06	3.60192e-05
	VWF	78.4421	311.478	3.52585	1.81797	2.28013e-06	3.60192e-05
	CENPU	3692.92	1325.69	0.376577	-1.40898	2.31962e-06	3.66008e-05
	C8orf44	28.1409	164.833	4.60674	2.20375	2.39088e-06	3.76818e-05
	CXADR	172.819	26.9694	0.213748	-2.22602	2.39984e-06	3.77795e-05
	STAC3	8.189	83.6868	6.16962	2.62518	2.46491e-06	3.87594e-05
	ARL6	146.057	22.9331	0.207589	-2.2682	2.47662e-06	3.88989e-05
	C2orf54	135.284	468.484	3.16883	1.66395	2.49097e-06	3.90794e-05
	TMEM200B	9.26048	88.7205	5.98037	2.58023	2.49904e-06	3.91611e-05
	SOBP	166.271	29.2296	0.222128	-2.17053	2.52435e-06	3.95126e-05
	AHRR	438.48	1278.76	2.81464	1.49295	2.54988e-06	3.98666e-05
	WDR63	3.39885	74.322	7.79986	2.96345	2.57025e-06	4.01393e-05
	NDRG1	2876.59	8308.19	2.68478	1.4248	2.59838e-06	4.05323e-05
	PSRC1	5565.91	2051.35	0.383234	-1.3837	2.6044e-06	4.05744e-05
	TSPAN14	5818.11	15624.6	2.58695	1.37125	2.607e-06	4.05744e-05
	TNFSF4	3.2868	58.4714	7.44461	2.8962	2.6364e-06	4.09854e-05
	CEP57	834.169	241.145	0.317086	-1.65705	2.67675e-06	4.15184e-05
	LOC101927755	6.51758	82.6992	6.49927	2.70028	2.67518e-06	4.15184e-05
	EDNRA	212.48	43.5963	0.245996	-2.0233	2.68024e-06	4.15256e-05
	SNAI3	15.7617	125.276	5.42508	2.43964	2.70677e-06	4.18892e-05
	C17orf75	907.361	297.104	0.349761	-1.51556	2.74834e-06	4.24845e-05
	MCM10	1398.81	413.776	0.328264	-1.60707	2.75146e-06	4.24847e-05
	CC2D1A	2032.3	726.973	0.372942	-1.42298	2.7737e-06	4.27799e-05
	RNF44	804.1	2243.27	2.6538	1.40806	2.81899e-06	4.34295e-05
	TMEM106B	989.944	326.603	0.352261	-1.50528	2.84054e-06	4.37125e-05
	CAND2	126.248	16.6391	0.182825	-2.45147	2.86282e-06	4.39073e-05
	EID2B	239.026	850.94	3.21566	1.68512	2.8585e-06	4.39073e-05
	LBR	2150.04	708.924	0.358237	-1.48101	2.861e-06	4.39073e-05
	SEC1P	0	35.0372	9.05264	3.17834	2.90249e-06	4.44659e-05
	ODF2L	312.057	75.5921	0.275264	-1.86111	2.90584e-06	4.44675e-05
	MORN4	227.191	47.8832	0.251209	-1.99304	2.91114e-06	4.44989e-05
	GTF2IRD1	1026.94	331.91	0.347649	-1.5243	2.92445e-06	4.46028e-05
	TNFRSF1A	7934.86	21348	2.61006	1.38408	2.92409e-06	4.46028e-05
	ACADM	1279.4	403.655	0.335913	-1.57384	2.97516e-06	4.53257e-05
	CHEK1	861.831	252.237	0.321441	-1.63737	2.99182e-06	4.55288e-05
	IMPA2	459.051	117.449	0.290554	-1.78312	3.05925e-06	4.65034e-05
	IGF1R	1988.06	5777.88	2.74534	1.45699	3.06274e-06	4.65048e-05
	OBSCN	37.4014	199.126	4.27413	2.09563	3.08865e-06	4.68463e-05
	LOC101928674	43.7112	216.018	4.04884	2.01751	3.10359e-06	4.70208e-05
	L3MBTL3	360.393	95.0121	0.295819	-1.75721	3.11209e-06	4.70975e-05
	TRDMT1	436.627	122.981	0.310512	-1.68728	3.14677e-06	4.75698e-05
	LINC00959	3.55059	59.7268	7.24531	2.85705	3.16438e-06	4.77831e-05
	TNK1	2.68687	62.009	7.72305	2.94917	3.2559e-06	4.9111e-05
	APOD	7.86919	82.1612	6.24523	2.64276	3.28284e-06	4.94629e-05
	TNNT2	0.43186	38.565	8.72289	3.12481	3.2975e-06	4.96292e-05
	ANLN	4760.48	1566.09	0.353007	-1.50223	3.32084e-06	4.99256e-05
	LOC284837	21.3596	135.589	4.82387	2.27019	3.33771e-06	5.01242e-05
	HAUS5	1486.06	506.071	0.36518	-1.45332	3.3887e-06	5.08343e-05
	CCND2	1789.07	4979.31	2.68065	1.42258	3.4093e-06	5.10873e-05
	TMEM246	630.238	180.689	0.320706	-1.64068	3.41809e-06	5.1163e-05
	GPSM1	4669.59	12343.2	2.5257	1.33668	3.42346e-06	5.11875e-05
	STK10	6940.02	18303.5	2.51706	1.33174	3.51697e-06	5.25283e-05
	MYBPHL	0.375835	38.5674	8.66866	3.11581	3.56639e-06	5.32083e-05
	ZIC2	751.59	227	0.318193	-1.65203	3.57384e-06	5.32615e-05
	HSPG2	1344.59	3718.68	2.6259	1.39281	3.59952e-06	5.35859e-05
	SLC25A45	161.569	580.988	3.2202	1.68715	3.60386e-06	5.35923e-05
	TMEM115	5552.66	15174.5	2.5775	1.36597	3.65178e-06	5.42459e-05
	CDC6	4356	1612.33	0.389852	-1.359	3.66249e-06	5.43462e-05
	ANP32AP1	440.7	126.492	0.314252	-1.67001	3.6869e-06	5.46491e-05
	CEP131	2200.16	800.841	0.380138	-1.39541	3.69984e-06	5.47817e-05
	FKBP5	592.451	182.949	0.333891	-1.58255	3.71152e-06	5.48953e-05
	C1orf35	1644.65	570.185	0.359374	-1.47644	3.74749e-06	5.53675e-05
	NEAT1	531.743	1515.52	2.68486	1.42485	3.76244e-06	5.55284e-05
	SDC3	14315.6	38088.7	2.59155	1.37382	3.77692e-06	5.56448e-05
	ZDHHC5	4725.39	12425.9	2.53244	1.34053	3.77845e-06	5.56448e-05
	BRCC3	887.661	293.586	0.353183	-1.50151	3.78416e-06	5.56691e-05
	TMEM62	408.007	115.444	0.308095	-1.69855	3.79793e-06	5.58117e-05
	LOC101060091	6.78137	88.75	6.43195	2.68526	3.81543e-06	5.60087e-05
	GNA11	9893.65	26781	2.65492	1.40867	3.83361e-06	5.62154e-05
	ARFGAP1	5253.3	13785.4	2.52031	1.3336	3.84808e-06	5.63672e-05
	CHRM5	0	34.0201	8.81712	3.14031	3.91337e-06	5.72623e-05
	LOC646903	29.2287	157.495	4.33135	2.11482	3.92717e-06	5.74029e-05
	C12orf66	62.6874	257.529	3.60674	1.85069	3.97515e-06	5.80423e-05
	ANP32C	447.309	129.531	0.317412	-1.65557	3.9891e-06	5.8045e-05
	EMG1	6338.82	2399.8	0.394053	-1.34354	3.98224e-06	5.8045e-05
	HIC1	1176.37	3613.73	2.99044	1.58036	3.99229e-06	5.8045e-05
	YTHDF3-AS1	53.5716	234.908	3.74489	1.90492	3.98783e-06	5.8045e-05
	ALKBH8	227.193	50.9073	0.262047	-1.9321	4.0274e-06	5.84934e-05
	NEB	1.29558	51.6542	8.23684	3.04209	4.10101e-06	5.94365e-05
	RXRA	3377.24	8876.47	2.5174	1.33193	4.09963e-06	5.94365e-05
	FBXO22	1917.23	5096.71	2.53705	1.34315	4.14756e-06	6.00475e-05
	DTL	2249.64	800.46	0.379371	-1.39832	4.19056e-06	6.0606e-05
	C19orf44	231.528	49.1581	0.244946	-2.02947	4.22909e-06	6.10987e-05
	GPSM2	2016.67	687.876	0.357786	-1.48283	4.25905e-06	6.14667e-05
	PIM3	1845.52	5003.87	2.63696	1.39888	4.29384e-06	6.19036e-05
	HOXC13	689.669	1893.05	2.64828	1.40506	4.33554e-06	6.24391e-05
	ASPA	1.29558	51.9048	8.19371	3.03452	4.39588e-06	6.32415e-05
	ADAMTS7	131.654	459.63	3.16902	1.66404	4.43684e-06	6.3697e-05
	LRRC4C	13.6188	105.318	5.2793	2.40035	4.43592e-06	6.3697e-05
	TGM4	11.0439	92.9952	5.58459	2.48145	4.48815e-06	6.43661e-05
	EFCAB7	95.5974	10.8413	0.173722	-2.52514	4.50067e-06	6.44783e-05
	TMEM68	401.394	1158.92	2.7494	1.45912	4.51756e-06	6.46525e-05
	HOXA11	206	43.8419	0.252881	-1.98347	4.54314e-06	6.49508e-05
	SNORA57	28.9813	161.087	4.32	2.11103	4.55806e-06	6.50962e-05
	LIG4	386.283	88.7009	0.275061	-1.86218	4.60502e-06	6.56983e-05
	HOXA3	306.044	77.1324	0.281037	-1.83117	4.61093e-06	6.57142e-05
	ZNF654	214.847	673.86	2.91702	1.5445	4.6233e-06	6.58219e-05
	ARHGAP23	3257.63	8427.77	2.53474	1.34184	4.6503e-06	6.61376e-05
	ADIRF	4.84617	71.6048	6.6759	2.73896	4.71232e-06	6.69502e-05
	LRRCC1	449.055	127.804	0.305693	-1.70985	4.76037e-06	6.75627e-05
	NFKBIE	1618.5	4467.8	2.5789	1.36676	4.81171e-06	6.82206e-05
	SYP	51.34	261.666	4.04569	2.01639	4.8405e-06	6.85579e-05
	CCR3	30.9165	172.095	4.39228	2.13497	4.84784e-06	6.85909e-05
	CDK1	9525.58	3156.33	0.362287	-1.4648	4.92826e-06	6.96568e-05
	PTCH1	6150.31	16695.2	2.55168	1.35145	5.01158e-06	7.07614e-05
	TTC5	585.966	184.416	0.334283	-1.58086	5.02947e-06	7.09409e-05
	UMODL1	1.23955	44.0925	7.9756	2.99559	5.05974e-06	7.12944e-05
	SH2D4A	1340.26	447.573	0.360827	-1.47062	5.09073e-06	7.16574e-05
	ANKRA2	264.186	795.618	2.81859	1.49498	5.13433e-06	7.21228e-05
	KRT17	251835	653061	2.57498	1.36456	5.13286e-06	7.21228e-05
	LMBRD1	463.792	108.101	0.279071	-1.8413	5.1463e-06	7.2217e-05
	LOC728743	34.2103	228.913	4.737	2.24397	5.15909e-06	7.23223e-05
	FAM69A	799.763	253.753	0.342122	-1.54742	5.2147e-06	7.30271e-05
	TOB1-AS1	4.35828	63.7705	6.75789	2.75657	5.28135e-06	7.3885e-05
	SLC12A7	3180.44	8247.22	2.49521	1.31916	5.32044e-06	7.43558e-05
	KIF2C	4827.03	1574.98	0.357125	-1.4855	5.36247e-06	7.48669e-05
	POMGNT2	787.493	257.298	0.352164	-1.50568	5.39024e-06	7.51779e-05
	MTMR6	1831.97	607.861	0.362315	-1.46469	5.39634e-06	7.51865e-05
	AGPS	2967.33	962.601	0.352894	-1.50269	5.44512e-06	7.5789e-05
	PAQR3	361.712	94.2457	0.298954	-1.74201	5.48611e-06	7.6282e-05
	CLP1	879.418	2539.41	2.75092	1.45991	5.52389e-06	7.67294e-05
	AGXT	100.371	355.911	3.22378	1.68875	5.68801e-06	7.89291e-05
	UQCC1	1908.47	5003.39	2.50661	1.32574	5.69928e-06	7.90055e-05
	NCKIPSD	1119.75	389.632	0.370021	-1.43432	5.71627e-06	7.91608e-05
	RFC1	2044.77	675.688	0.364792	-1.45485	5.75856e-06	7.96659e-05
	MMS22L	603.588	189.007	0.339727	-1.55755	5.79424e-06	8.00786e-05
	HMCN2	384.603	1117.51	2.71062	1.43862	5.80658e-06	8.01683e-05
	IER3	8221.26	24366.2	2.69729	1.43151	5.81921e-06	8.02618e-05
	DDR1	1451.2	3836.5	2.53314	1.34093	5.86919e-06	8.0811e-05
	POLA1	586.821	186.528	0.33825	-1.56384	5.87083e-06	8.0811e-05
	DAZAP2	5997.59	15390.1	2.46657	1.3025	5.88933e-06	8.09843e-05
	NR0B1	294.087	868.13	2.76292	1.46619	6.02625e-06	8.27009e-05
	YBEY	513.848	1443.77	2.63883	1.3999	6.02052e-06	8.27009e-05
	CDC23	2687.07	918.285	0.367853	-1.4428	6.093e-06	8.35332e-05
	METTL18	316.002	82.9179	0.29726	-1.7502	6.11329e-06	8.37276e-05
	PGAP2	367.949	98.2746	0.304565	-1.71518	6.12664e-06	8.38266e-05
	SETDB2	343.462	94.5085	0.30614	-1.70774	6.16271e-06	8.4236e-05
	TMTC4	558.379	175.405	0.339622	-1.558	6.18355e-06	8.44367e-05
	SAMD1	882.759	256.505	0.337878	-1.56543	6.22967e-06	8.49816e-05
	FAM111A	2922.66	1031.38	0.383879	-1.38128	6.25473e-06	8.52386e-05
	GDNF	292.325	1177.27	3.40764	1.76877	6.26492e-06	8.52926e-05
	PHYHIP	62.4003	251.252	3.527	1.81844	6.29162e-06	8.5571e-05
	FAM169A	309.763	82.4143	0.298	-1.74661	6.32421e-06	8.59289e-05
	EPAS1	593.252	1682.7	2.64876	1.40532	6.37759e-06	8.65684e-05
	POLR2L	7179.94	20889.4	2.68511	1.42498	6.39192e-06	8.66769e-05
	CDKN3	3659.92	1368.47	0.393283	-1.34636	6.4917e-06	8.79429e-05
	GUK1	3428.68	10475	2.80334	1.48715	6.51394e-06	8.8157e-05
	STEAP2	103.24	11.3351	0.175815	-2.50787	6.53992e-06	8.84213e-05
	IER5L	401.816	1149.08	2.67968	1.42206	6.55253e-06	8.85044e-05
	TRABD2B	220.424	665.692	2.86288	1.51747	6.57135e-06	8.86712e-05
	KIFC1	5809.05	1958.83	0.368006	-1.4422	6.60641e-06	8.90565e-05
	SFI1	481.636	145.927	0.33128	-1.59387	6.62928e-06	8.92768e-05
	HOXC4	340.124	89.4723	0.296279	-1.75497	6.66135e-06	8.95327e-05
	PRC1	10566.4	3566.33	0.363018	-1.46189	6.65793e-06	8.95327e-05
	SLC43A3	6545.37	2417.64	0.393507	-1.34554	6.67796e-06	8.9668e-05
	OSER1	2480.41	6563.04	2.51938	1.33307	6.71278e-06	9.00472e-05
	SMIM4	889.172	2788.52	2.88513	1.52864	6.7374e-06	9.0289e-05
	RBL1	1054.64	350.106	0.364215	-1.45714	6.77492e-06	9.07032e-05
	EGF	348.42	92.4744	0.297222	-1.75039	6.89401e-06	9.22073e-05
	C7orf55	773.214	2321.5	2.84412	1.50798	6.92111e-06	9.24795e-05
	EPOR	226.038	50.3964	0.266942	-1.9054	6.95029e-06	9.27789e-05
	ABCB10	776.132	247.955	0.344627	-1.53689	7.06249e-06	9.40932e-05
	EHD1	7944.34	20372.6	2.46826	1.30349	7.05635e-06	9.40932e-05
	FPGT	422.515	126.035	0.322791	-1.63133	7.09304e-06	9.44085e-05
	GYG2	1702.55	625.557	0.386403	-1.37182	7.11745e-06	9.45495e-05
	RAD54B	286.295	70.0645	0.286226	-1.80477	7.11259e-06	9.45495e-05
	SLFN5	266.707	789.059	2.7761	1.47306	7.13725e-06	9.47207e-05
	CDK2	4387.53	1696.15	0.398146	-1.32863	7.16286e-06	9.49686e-05
	MTMR4	1267.26	442.507	0.37094	-1.43074	7.25369e-06	9.60798e-05
	TBC1D2	422.056	1223.9	2.70978	1.43818	7.27654e-06	9.62894e-05
	TNFRSF10A	8.77259	80.3875	5.67442	2.50447	7.32842e-06	9.68823e-05
	FLNC	1891.71	4934.08	2.5027	1.32349	7.442e-06	9.8289e-05
	DOK1	1745.52	643.181	0.387522	-1.36765	7.49945e-06	9.89523e-05
	RPL26L1	1695.37	4686.35	2.65965	1.41123	7.82244e-06	0.000103115
	PVRL2	22247.5	56338	2.42551	1.27829	7.87401e-06	0.000103595
	TCEA2	2507.62	6597.04	2.48944	1.31582	7.86823e-06	0.000103595
	TIPIN	1177.38	415.845	0.376281	-1.41012	7.89336e-06	0.00010375
	GGCT	2493.17	916.194	0.383854	-1.38137	7.96775e-06	0.000104627
	GABBR2	26.8617	143.89	4.26223	2.09161	7.98462e-06	0.000104706
	TCP10L	17.6572	113.919	4.74956	2.24779	7.9934e-06	0.000104706
	WHAMM	438.907	1243.4	2.70113	1.43356	7.99666e-06	0.000104706
	AKAP12	1128.7	343.68	0.330658	-1.59659	8.04236e-06	0.000105204
	MTURN	353.777	1209.3	3.19742	1.67691	8.05604e-06	0.000105282
	KRT16	494.463	1431.78	2.63192	1.39612	8.13743e-06	0.000106244
	TMEM67	130.552	21.9332	0.216331	-2.20869	8.18749e-06	0.000106796
	DUSP7	967.161	2677.13	2.74206	1.45526	8.27675e-06	0.000107858
	HSD17B11	2023.03	726.846	0.385057	-1.37686	8.30051e-06	0.000108064
	AKTIP	409.244	119.724	0.318901	-1.64882	8.30995e-06	0.000108085
	MRPL19	3295.11	1222.26	0.39282	-1.34806	8.35179e-06	0.000108526
	BZRAP1-AS1	11.6112	113.69	5.75534	2.5249	8.36256e-06	0.000108563
	SAT1	951.096	2841.48	2.74875	1.45878	8.47287e-06	0.000109891
	WHSC1	2050.77	771.764	0.391455	-1.35308	8.55992e-06	0.000110915
	SNAI1	651.46	1751.61	2.55423	1.35289	8.65916e-06	0.000112094
	DARS2	1376.91	454.393	0.363409	-1.46033	8.80122e-06	0.000113826
	CCDC138	300.059	70.0572	0.279911	-1.83696	8.81851e-06	0.000113942
	TMC8	2.36706	49.1459	7.13373	2.83466	8.85683e-06	0.000114329
	GINS1	1498.79	535.822	0.378146	-1.40299	8.92866e-06	0.000115148
	LRRC37A3	44.6543	201.359	3.83434	1.93898	8.98847e-06	0.00011581
	SHB	1659.64	4429.97	2.56562	1.3593	9.10283e-06	0.000117173
	MRPL36	4038.05	10680.1	2.58452	1.36989	9.11861e-06	0.000117266
	METRNL	1827.59	5268.28	2.80671	1.48888	9.23495e-06	0.000118651
	ATAD2	1167.79	376.752	0.355312	-1.49284	9.26297e-06	0.000118878
	BCL2L1	3720.25	10234.9	2.74292	1.45571	9.26996e-06	0.000118878
	ZNF541	1.23955	41.0782	7.57685	2.9216	9.37257e-06	0.000120081
	NAE1	2404.26	835.225	0.379868	-1.39643	9.39938e-06	0.000120312
	FNBP1L	668.255	190.484	0.315079	-1.66621	9.47033e-06	0.000121107
	ADRM1	18127	46261.1	2.45106	1.29341	9.54318e-06	0.000121925
	XYLT2	4663.79	1817.38	0.406994	-1.29692	9.70423e-06	0.000123867
	MZF1	206.674	654.875	2.86543	1.51875	9.72143e-06	0.000123971
	ARMC9	1048.22	354.843	0.36702	-1.44607	9.75134e-06	0.000124237
	FAM129B	24709.5	64288.2	2.46874	1.30377	9.7738e-06	0.000124407
	MARK4	1617.12	4695.03	2.87608	1.5241	9.9021e-06	0.000125923
	ZNF778	71.8031	320.619	3.79307	1.92337	9.95689e-06	0.000126502
	USP1	4195.12	1601.47	0.400594	-1.31979	1.00411e-05	0.000127454
	NSMCE4A	1621.42	595.497	0.388308	-1.36473	1.01925e-05	0.000129256
	NPRL2	1075.09	383.119	0.379484	-1.39789	1.03668e-05	0.000131344
	MGRN1	2285.23	5810.18	2.43401	1.28334	1.0488e-05	0.000132757
	CDIP1	1358.01	3763.27	2.65432	1.40834	1.05123e-05	0.000132803
	HRAS	3373.1	9247.56	2.52595	1.33683	1.05207e-05	0.000132803
	NUAK1	2633.42	6821.36	2.45232	1.29415	1.05035e-05	0.000132803
	FAM49A	171.656	569.741	3.03877	1.60349	1.06393e-05	0.000134177
	DHX57	412.223	123.249	0.329586	-1.60127	1.06883e-05	0.000134547
	KCNS3	454.172	127.271	0.317137	-1.65682	1.06838e-05	0.000134547
	COQ9	2431.78	921.57	0.399641	-1.32322	1.06982e-05	0.000134548
	ENPP4	488.006	133.061	0.315119	-1.66603	1.07196e-05	0.000134675
	MYLK-AS1	15.9298	111.16	4.87241	2.28464	1.0728e-05	0.000134675
	LOC400553	7.53304	74.855	5.76389	2.52704	1.07795e-05	0.000135198
	INTS9	777.418	251.773	0.355988	-1.4901	1.08551e-05	0.000136021
	BORA	650.388	211.94	0.353166	-1.50158	1.09451e-05	0.000137024
	IFT80	490.051	151.223	0.334935	-1.57805	1.09884e-05	0.00013744
	PAFAH2	582.714	186.469	0.345222	-1.53441	1.10372e-05	0.000137925
	THOC6	1773.25	636.356	0.385426	-1.37547	1.10807e-05	0.000138342
	SUCLA2	2603.09	838.382	0.35614	-1.48948	1.11664e-05	0.000139285
	GRIA1	5.48579	64.4977	6.11605	2.6126	1.12183e-05	0.000139805
	CDC20	14681.7	5152.08	0.382861	-1.38511	1.12863e-05	0.000140525
	GALNT9	1.50334	50.9171	7.47004	2.90112	1.13779e-05	0.000141536
	TOP2A	10563.6	4031.02	0.411207	-1.28206	1.14293e-05	0.000142047
	BAI1	3384.57	8530.89	2.40843	1.26809	1.15672e-05	0.000143631
	NXPH2	201.314	45.8613	0.268965	-1.89451	1.17251e-05	0.000145459
	KIAA1279	2238.87	724.47	0.355993	-1.49008	1.17827e-05	0.000146042
	DLK2	99.9137	13.3594	0.195204	-2.35695	1.19258e-05	0.000147336
	FAM109B	803.82	256.816	0.34958	-1.51631	1.19302e-05	0.000147336
	LINC00880	1.9352	47.8905	7.17393	2.84276	1.19156e-05	0.000147336
	MAPKAPK2	5127.38	13333.8	2.53514	1.34206	1.18984e-05	0.000147336
	NME1-NME2	74.2356	278.192	3.30747	1.72573	1.20199e-05	0.00014831
	NUP35	1484.46	480.566	0.357719	-1.4831	1.20689e-05	0.000148781
	FAM92B	3.06271	58.9824	6.89301	2.78513	1.20966e-05	0.000148989
	DHX40	1329.44	490.953	0.389837	-1.35906	1.21628e-05	0.000149669
	EXTL3	3869.76	9801.86	2.42046	1.27528	1.22658e-05	0.000150802
	ZNF232	197.843	44.8516	0.268108	-1.89911	1.23189e-05	0.000151319
	ENKD1	596.83	186.039	0.328107	-1.60776	1.23843e-05	0.000151985
	CTSW	70.0687	266.889	3.36753	1.75169	1.24607e-05	0.000152786
	LRP1	1276.78	3266.09	2.44566	1.29022	1.24946e-05	0.000153065
	SPAG1	345.371	99.7928	0.320005	-1.64383	1.254e-05	0.000153483
	IGFL2	0.375835	34.5311	7.75409	2.95496	1.26001e-05	0.000154081
	PDDC1	957.109	2689.07	2.58381	1.3695	1.2734e-05	0.00015558
	RBM41	600.722	192.297	0.351192	-1.50967	1.28014e-05	0.000156264
	DPF1	595.831	181.726	0.333355	-1.58487	1.28519e-05	0.00015674
	KDM4B	1477.39	3825.66	2.49966	1.32173	1.30589e-05	0.000159123
	SNTB1	311.656	86.9346	0.311128	-1.68442	1.34243e-05	0.00016343
	MEIS2	313.902	87.4431	0.312577	-1.67771	1.34406e-05	0.000163483
	APBA1	841.336	296.111	0.374731	-1.41607	1.35912e-05	0.000165168
	ORC4	1247.77	457.196	0.38917	-1.36153	1.36742e-05	0.00016603
	TANGO6	725.116	245.236	0.366204	-1.44928	1.37753e-05	0.00016711
	PIP4K2C	30774.4	12450.3	0.420912	-1.24841	1.38014e-05	0.000167278
	KCTD15	380.382	101.299	0.312042	-1.68019	1.38616e-05	0.000167859
	VAMP2	1485.61	4447.99	2.86201	1.51703	1.39554e-05	0.000168845
	ZNF205-AS1	1.18353	39.3118	7.33205	2.87422	1.40151e-05	0.000169419
	ZDHHC11	3.06271	59.9946	6.82764	2.77139	1.40414e-05	0.000169586
	DUS4L	227.263	55.9362	0.283668	-1.81772	1.40998e-05	0.000170142
	SOCS3	3346.65	8233.88	2.47634	1.30821	1.41347e-05	0.000170412
	ZFP1	318.292	89.9637	0.315605	-1.66381	1.42241e-05	0.000171339
	SDSL	2511.34	6381.94	2.40637	1.26686	1.42591e-05	0.000171459
	ZC2HC1A	370.573	109.379	0.326919	-1.613	1.4252e-05	0.000171459
	TSPAN9	5765.68	14263.1	2.37311	1.24678	1.43015e-05	0.000171819
	UACA	1918	702.684	0.394364	-1.3424	1.43144e-05	0.000171823
	ETAA1	603.066	201.622	0.358728	-1.47904	1.46007e-05	0.000175106
	ZNF425	114.228	406.903	3.11617	1.63978	1.46594e-05	0.000175656
	MYBL1	1843.55	704.131	0.40155	-1.31635	1.47436e-05	0.000176357
	VPS37D	87.9967	373.31	3.62143	1.85656	1.4734e-05	0.000176357
	CAMK2N1	1521.47	4438.85	2.67999	1.42223	1.51088e-05	0.000180567
	LOC101928068	2.53513	54.924	6.94577	2.79614	1.51245e-05	0.000180597
	KIF23	4600.31	1450.62	0.348681	-1.52002	1.52484e-05	0.000181919
	GPD2	1784.51	633.794	0.382383	-1.38691	1.53485e-05	0.000182794
	PHF19	5891.57	2255.76	0.410254	-1.28541	1.53402e-05	0.000182794
	USP37	585.805	193.304	0.357779	-1.48286	1.5457e-05	0.000183926
	LGR6	11.5155	87.9345	5.07136	2.34237	1.56486e-05	0.000186044
	UNKL	1078.77	2800.44	2.45098	1.29336	1.5739e-05	0.000186957
	ARHGEF1	6214.22	2453.64	0.414977	-1.2689	1.58924e-05	0.000188615
	SSU72	3687.81	9767.38	2.54131	1.34557	1.59406e-05	0.000189024
	WRAP73	1857.18	706.124	0.400389	-1.32053	1.59932e-05	0.000189484
	GPR137C	161.081	33.2635	0.253929	-1.9775	1.61637e-05	0.000191338
	FOSL1	13741.9	35581.1	2.6063	1.382	1.61798e-05	0.000191363
	EZH2	2153.7	736.609	0.374401	-1.41734	1.62323e-05	0.000191654
	SGOL2	1070.06	340.262	0.362998	-1.46197	1.62202e-05	0.000191654
	NAT14	1456.56	501.892	0.357244	-1.48502	1.62789e-05	0.000192037
	NASP	9325.38	3631.31	0.41615	-1.26482	1.63473e-05	0.000192678
	GPR1	496.044	137.8	0.298966	-1.74195	1.64084e-05	0.000193233
	LOC729987	10.9716	89.9784	5.25428	2.39349	1.64871e-05	0.000193993
	E2F8	326.306	88.4332	0.300466	-1.73473	1.65919e-05	0.000195058
	HAT1	6686.92	2332.44	0.385681	-1.37452	1.66448e-05	0.000195512
	TTYH3	7300.82	17639.6	2.44566	1.29023	1.66749e-05	0.000195697
	SLC13A1	7.42099	71.8186	5.64541	2.49708	1.67405e-05	0.000196299
	DNAH17	4.73412	60.9969	6.14248	2.61882	1.68118e-05	0.000196967
	SCLT1	773.253	231.584	0.338146	-1.56428	1.68977e-05	0.000197683
	SPAG5	7630.86	2789.72	0.399241	-1.32467	1.69018e-05	0.000197683
	ZNF195	659.434	1751.32	2.49281	1.31777	1.69899e-05	0.000198544
	CORO1A	364.653	106.379	0.328051	-1.60801	1.70767e-05	0.000199388
	DTNA	414.331	126.755	0.33569	-1.5748	1.71353e-05	0.000199902
	NKPD1	4.73412	59.9848	6.12195	2.61399	1.71647e-05	0.000200074
	ZNF771	334.862	939.032	2.64508	1.40331	1.71889e-05	0.000200187
	CTC1	237.752	58.7196	0.289031	-1.7907	1.72619e-05	0.000200866
	CCND1	107404	262096	2.36561	1.24221	1.73171e-05	0.000201337
	TMEM39B	1623.43	619.17	0.400932	-1.31857	1.74632e-05	0.000202864
	REN	2.53513	48.6423	6.78563	2.76248	1.7608e-05	0.000204372
	SKA1	2035.07	779.335	0.398865	-1.32603	1.78022e-05	0.000206451
	DNA2	250.906	63.7558	0.293789	-1.76715	1.79196e-05	0.000207637
	PARPBP	925.7	332.16	0.382696	-1.38573	1.80449e-05	0.000208912
	STX11	221.976	53.6736	0.285171	-1.8101	1.81317e-05	0.00020974
	POT1	477.294	155.009	0.351268	-1.50935	1.84574e-05	0.000213327
	ECT2	2618.78	792.199	0.339227	-1.55968	1.85322e-05	0.00021401
	ZNF521	176.061	35.2706	0.246915	-2.01791	1.87118e-05	0.000215903
	SLC16A7	354.933	107.381	0.330165	-1.59874	1.90998e-05	0.000220194
	SLC1A1	273.692	56.9385	0.257718	-1.95614	1.92555e-05	0.000221803
	KLF2	5746.42	14062.3	2.36407	1.24127	1.93841e-05	0.000223007
	STX1B	43.5268	211.994	3.88803	1.95904	1.93926e-05	0.000223007
	HOXB3	160.587	31.9983	0.247788	-2.01282	1.9442e-05	0.000223387
	LCE1E	0.375835	33.0153	7.44602	2.89647	1.94728e-05	0.000223553
	STXBP5-AS1	52.5142	232.842	3.92956	1.97437	1.94937e-05	0.000223606
	RAB27B	147.687	29.2345	0.247721	-2.01321	1.96944e-05	0.000225719
	LOC100131691	84.6609	328.362	3.61206	1.85282	1.97401e-05	0.000226054
	CENPK	804.448	279.497	0.372425	-1.42498	2.00748e-05	0.000229695
	ISOC1	2673.08	1062.3	0.411721	-1.28026	2.01821e-05	0.00023073
	ZNF767P	67.7016	288.633	3.52206	1.81642	2.02493e-05	0.000231305
	RELT	438.298	1177.32	2.58618	1.37082	2.04261e-05	0.000233129
	WIPI2	2720.79	6963.03	2.43238	1.28237	2.06274e-05	0.000235231
	RHBDF1	1240.51	3252.01	2.46161	1.2996	2.07984e-05	0.000236985
	MXD1	203.681	592.448	2.71213	1.43943	2.09591e-05	0.000238616
	TMOD2	447.293	142.148	0.344719	-1.53651	2.11657e-05	0.000240769
	BCL3	1145.34	3015.87	2.63086	1.39553	2.11896e-05	0.000240841
	RALGPS2	990.07	362.375	0.387658	-1.36714	2.12693e-05	0.000241545
	SLC25A30-AS1	2.36706	47.3893	6.65667	2.7348	2.12895e-05	0.000241575
	FZD8	682	235.085	0.365108	-1.45361	2.1605e-05	0.000244952
	C15orf41	446.567	143.863	0.348393	-1.52121	2.17598e-05	0.000246503
	TAF3	1320.68	3277.37	2.3882	1.25592	2.18087e-05	0.000246853
	FBXO3	936.636	298.084	0.347662	-1.52424	2.1873e-05	0.000247376
	XRCC1	4778.65	1836.16	0.408594	-1.29126	2.19267e-05	0.000247779
	DOCK10	720.286	237.342	0.349829	-1.51528	2.20464e-05	0.000248926
	CDC7	421.316	107.072	0.289147	-1.79012	2.21049e-05	0.000249381
	ANKRD11	2969.54	7304.69	2.35091	1.23322	2.21626e-05	0.000249827
	DYRK1B	142.894	467.732	3.08439	1.62498	2.22963e-05	0.000251127
	COL5A3	451.887	1191.61	2.50585	1.3253	2.23666e-05	0.000251536
	RACGAP1	5141.29	1663.14	0.347987	-1.5229	2.23694e-05	0.000251536
	FAM92A1	740.257	263.894	0.377311	-1.40617	2.26068e-05	0.000253998
	PCK2	662.741	226.85	0.371931	-1.42689	2.26458e-05	0.000254227
	KATNAL1	1566.53	604.557	0.405596	-1.30189	2.27968e-05	0.000255712
	KIFAP3	727.836	219.526	0.350206	-1.51372	2.28177e-05	0.000255738
	HAUS4	1920.14	736.125	0.405298	-1.30295	2.29651e-05	0.000257179
	KIF5B	14537.6	5439.69	0.412775	-1.27657	2.3077e-05	0.000258221
	GK5	1293.92	479.146	0.397642	-1.33046	2.31552e-05	0.000258885
	PRELID2	498.32	152.253	0.32881	-1.60467	2.33052e-05	0.00026035
	GBP2	1914.3	674.304	0.395696	-1.33753	2.33847e-05	0.000261024
	CKAP2L	1483.82	546.373	0.394807	-1.34078	2.34787e-05	0.000261647
	STK38L	714.684	240.652	0.36367	-1.4593	2.34752e-05	0.000261647
	DLX6	162.097	34.7719	0.26142	-1.93556	2.35114e-05	0.000261798
	HOTAIRM1	93.9797	329.426	3.11242	1.63804	2.36457e-05	0.000262866
	PPDPF	5010.74	16392.2	2.90877	1.54041	2.36325e-05	0.000262866
	WNT7A	8.75626	83.1537	5.63789	2.49515	2.37127e-05	0.000263397
	RNF126	2517.21	6742.42	2.564	1.3584	2.38411e-05	0.00026461
	EPB41L4B	361.061	989.77	2.56189	1.35721	2.3919e-05	0.000265248
	HIST1H2BK	1954.12	5257.15	2.68394	1.42435	2.39374e-05	0.000265248
	FURIN	10359.3	26028.1	2.47382	1.30674	2.39629e-05	0.000265307
	KCTD11	874.99	2280.15	2.47052	1.30481	2.40009e-05	0.000265307
	SOSTDC1	103.147	15.6294	0.214519	-2.22083	2.4e-05	0.000265307
	PI4K2A	3021.74	7514.34	2.36476	1.24169	2.40381e-05	0.000265505
	GTPBP2	1373.14	528.607	0.403132	-1.31068	2.40876e-05	0.000265593
	SCRN1	7544.58	3072.65	0.424609	-1.23579	2.41006e-05	0.000265593
	TMEM91	78.0989	305.552	3.24353	1.69757	2.41043e-05	0.000265593
	PPARD	2707.59	7174.36	2.69464	1.43009	2.41701e-05	0.000266105
	TLL2	14.6342	95.7516	4.6584	2.21984	2.4406e-05	0.000268485
	LIN9	404.576	122.719	0.334851	-1.57841	2.44328e-05	0.000268564
	POLN	21.0794	134.855	4.59436	2.19986	2.46109e-05	0.000270306
	FLNB	1964.85	4812.2	2.34733	1.23102	2.4788e-05	0.000272033
	RYR1	13.6748	92.241	4.71922	2.23855	2.48302e-05	0.000272277
	SNHG20	60.7359	241.698	3.46743	1.79387	2.52862e-05	0.000277056
	HSPA13	2344.27	764.549	0.36418	-1.45727	2.5359e-05	0.000277631
	EPN3	0.43186	32.5117	7.24807	2.8576	2.5406e-05	0.000277924
	TMA7	639.452	1954.73	2.81167	1.49143	2.56318e-05	0.00028017
	WFS1	2021.03	5089.79	2.45015	1.29287	2.58053e-05	0.000281842
	GLRB	539.879	168.577	0.343663	-1.54093	2.6081e-05	0.000284626
	UBR7	3743.8	1523.26	0.423444	-1.23976	2.61971e-05	0.000285665
	HHAT	172.772	508.501	2.74871	1.45876	2.62563e-05	0.000286083
	IFFO2	2220.29	5408.58	2.35077	1.23314	2.6402e-05	0.000287441
	PLXND1	6823.65	16446.4	2.30991	1.20784	2.66462e-05	0.00028987
	LINC00641	316.719	90.9635	0.319651	-1.64543	2.67395e-05	0.000290654
	CENPQ	588.499	204.15	0.371766	-1.42753	2.69617e-05	0.000292837
	KDM7A	33.7154	155.27	3.76211	1.91154	2.70832e-05	0.000293923
	METTL5	2294.27	873.581	0.399895	-1.32231	2.71122e-05	0.000294006
	KIF20B	858.407	321.181	0.381254	-1.39117	2.7343e-05	0.000296274
	PRKD3	1982.03	778.244	0.412295	-1.27825	2.74467e-05	0.000297162
	CATSPER1	659.303	221.585	0.349669	-1.51594	2.74854e-05	0.000297345
	CREM	354.963	990.927	2.66882	1.4162	2.7603e-05	0.000298382
	RGS5	96.1787	319.042	3.00852	1.58905	2.76856e-05	0.000299039
	WWTR1-AS1	2.10327	43.6036	6.63093	2.72921	2.78424e-05	0.000300496
	HYLS1	837.993	299.855	0.37893	-1.4	2.83448e-05	0.000305678
	ZNF32	174.957	40.324	0.274662	-1.86427	2.90126e-05	0.000312634
	KDR	18.633	109.615	4.37462	2.12916	2.91701e-05	0.000314083
	HOXA10	196.139	45.6181	0.27747	-1.8496	2.9259e-05	0.000314299
	MYO16	15.5936	98.2648	4.58711	2.19759	2.92572e-05	0.000314299
	RNF213	1218.21	3001.85	2.35777	1.23743	2.92559e-05	0.000314299
	MAN1B1-AS1	50.2288	199.608	3.41817	1.77322	2.93596e-05	0.000315132
	HES4	682.336	1923.47	2.59774	1.37725	2.9629e-05	0.000317775
	DPYSL5	202.748	49.9124	0.281298	-1.82983	2.99314e-05	0.000320688
	MAST4	229.836	668.04	2.64675	1.40422	2.99656e-05	0.000320688
	RRM1	9914.37	3931.4	0.426648	-1.22888	2.99709e-05	0.000320688
	PMM2	3055.55	7581.76	2.36304	1.24064	3.00312e-05	0.000321083
	SCAND1	4527.6	10965.9	2.30609	1.20545	3.01813e-05	0.000322436
	AURKB	6104.15	2346.36	0.40829	-1.29233	3.0512e-05	0.000325715
	RAB5C	11847.3	28261.6	2.30663	1.20579	3.06811e-05	0.000327265
	KIF18B	1934.38	737.768	0.397057	-1.33258	3.08411e-05	0.000328715
	CPEB4	340.32	957.791	2.62247	1.39093	3.09213e-05	0.000329314
	SMC2	1446.04	562.602	0.41038	-1.28497	3.10109e-05	0.000330012
	CD99	1151.77	2826.21	2.39663	1.26101	3.10759e-05	0.000330447
	PMPCB	2511.22	881.57	0.389797	-1.3592	3.13112e-05	0.000332175
	PNMAL1	678.27	231.107	0.372832	-1.4234	3.12911e-05	0.000332175
	POLG2	382.049	120.724	0.346558	-1.52883	3.12715e-05	0.000332175
	NDUFA7	1263.7	3525.18	2.61318	1.38581	3.15328e-05	0.000334046
	NUDT18	603.395	1582.87	2.46101	1.29925	3.15363e-05	0.000334046
	LY6G5B	112.835	357.044	2.96283	1.56698	3.1576e-05	0.000334141
	SPC25	2405.67	964.093	0.417389	-1.26053	3.15941e-05	0.000334141
	NTNG2	81.5188	305.702	3.402	1.76638	3.17961e-05	0.000336018
	CTIF	12430.8	29509.6	2.28226	1.19046	3.19083e-05	0.000336842
	GRIN2C	3.81438	59.2306	6.23028	2.6393	3.19232e-05	0.000336842
	NR2F1	407.314	128.75	0.341153	-1.55151	3.19689e-05	0.000337064
	HIST1H3D	41.9044	177.456	3.53945	1.82353	3.24284e-05	0.000341646
	GOLGA7B	61.5599	273.013	3.5715	1.83653	3.24746e-05	0.000341869
	FAM186B	5.54181	59.9799	5.65469	2.49945	3.26547e-05	0.000343501
	PRIMPOL	503.845	170.083	0.362129	-1.46542	3.26966e-05	0.000343678
	PGBD2	115.211	366.421	2.92004	1.54599	3.27266e-05	0.00034373
	KNTC1	469.649	158.549	0.36003	-1.47381	3.29281e-05	0.000345581
	NCOA7	418.526	132.825	0.351397	-1.50882	3.36169e-05	0.00035254
	ZNF639	641.454	219.015	0.368419	-1.44058	3.37002e-05	0.000353143
	MRPL1	1909.35	738.989	0.413744	-1.27319	3.38522e-05	0.000354465
	ACOT4	158.093	35.2927	0.264722	-1.91745	3.39367e-05	0.000355077
	CCDC181	91.573	12.8509	0.209508	-2.25492	3.42822e-05	0.000358294
	SPSB4	143.31	25.7043	0.243286	-2.03927	3.42964e-05	0.000358294
	MAMDC4	8.82862	77.1397	5.1432	2.36267	3.46534e-05	0.000361748
	FRMD6-AS1	24.0231	124.775	4.02551	2.00917	3.47504e-05	0.000362485
	HMX2	148.142	30.9959	0.260512	-1.94058	3.48597e-05	0.000363347
	C15orf39	3829.06	9209.21	2.31195	1.20911	3.49427e-05	0.000363936
	SMCHD1	1144.27	395.14	0.378263	-1.40254	3.53395e-05	0.000367788
	SIPA1L3	1184.62	2926.57	2.34425	1.22913	3.53964e-05	0.000368009
	SQRDL	1014.82	333.421	0.370271	-1.43335	3.54144e-05	0.000368009
	GKAP1	186.395	45.8834	0.279634	-1.83839	3.57354e-05	0.000371063
	RPL23AP53	282.453	788.437	2.75699	1.46309	3.61291e-05	0.000374867
	C18orf54	763.442	277.983	0.387535	-1.3676	3.63513e-05	0.000376887
	ANAPC4	426.619	132.818	0.348532	-1.52064	3.63926e-05	0.000377029
	CEP162	216.551	55.1893	0.297423	-1.74941	3.66084e-05	0.000378979
	DEK	12815.4	5411.45	0.436394	-1.1963	3.68913e-05	0.000381619
	RAP2B	2028.15	4924.08	2.35968	1.23859	3.73384e-05	0.000385952
	SYNC	5889.4	13859.1	2.2864	1.19308	3.77443e-05	0.000389854
	PYGM	11.2914	91.246	5.04134	2.33381	3.81318e-05	0.00039356
	ESPL1	793.922	273.114	0.361734	-1.467	3.8187e-05	0.000393832
	CAPN10-AS1	29.1004	170.417	4.22351	2.07844	3.83549e-05	0.000395266
	NPLOC4	18675.6	43927.2	2.26686	1.1807	3.84235e-05	0.000395675
	LINC01191	2.53513	44.8712	6.31818	2.65951	3.87989e-05	0.000399241
	MTERFD3	318.687	97.5327	0.337972	-1.56502	3.92897e-05	0.000403988
	GPRC5C	1301.45	3154.87	2.33164	1.22135	3.93387e-05	0.000404188
	MTRNR2L8	96.4682	325.436	2.96787	1.56943	3.94832e-05	0.000405065
	TMEM154	172.445	36.3023	0.2542	-1.97597	3.94718e-05	0.000405065
	KIAA1731	270.769	78.1347	0.321185	-1.63852	4.0173e-05	0.000411834
	SPTLC3	663.512	218.266	0.369922	-1.43471	4.04604e-05	0.000414469
	RAB27A	2676.17	1067.82	0.405571	-1.30197	4.08664e-05	0.000418316
	TPX2	10100.5	3985.48	0.422983	-1.24133	4.0976e-05	0.000419125
	NPPB	17621.8	41148.6	2.26868	1.18186	4.14281e-05	0.000423433
	BRPF3	934.078	352.003	0.401454	-1.31669	4.14805e-05	0.000423652
	NOP16	4505.45	11029.6	2.32645	1.21813	4.21736e-05	0.000430409
	FUCA1	785.726	1948.96	2.40075	1.26349	4.24301e-05	0.000432704
	PPP2R2D	1445.29	3567.83	2.34745	1.23109	4.26606e-05	0.000434731
	SLCO2B1	14.2187	93.7347	4.57936	2.19515	4.29728e-05	0.000437587
	MAP3K4	1023.69	379.277	0.396996	-1.3328	4.30202e-05	0.000437745
	CACNG8	222.966	625.645	2.59577	1.37616	4.30627e-05	0.000437852
	GINS3	1117.53	404.758	0.389584	-1.35999	4.31372e-05	0.000438284
	GLMN	281.038	81.9033	0.327298	-1.61132	4.33578e-05	0.000440199
	EML4	2381.16	894.72	0.41016	-1.28574	4.36614e-05	0.000442806
	METTL4	462.966	157.5	0.367521	-1.4441	4.36792e-05	0.000442806
	SNX14	1755.54	649.507	0.405875	-1.30089	4.40975e-05	0.000446715
	C7orf43	530.518	1336.79	2.43309	1.28279	4.41627e-05	0.000447045
	PPP1R26	1002.85	385.289	0.406304	-1.29937	4.42973e-05	0.000448077
	MYCN	156.796	595.505	3.05367	1.61054	4.5117e-05	0.000456031
	RHCE	11.5715	81.6404	4.7182	2.23824	4.54678e-05	0.000459203
	STAM-AS1	13.1869	88.2145	4.59295	2.19942	4.54979e-05	0.000459203
	CD97	2723.85	1058.45	0.414994	-1.26884	4.63184e-05	0.000467141
	KITLG	179.208	521.116	2.78171	1.47597	4.69e-05	0.000472659
	NOL3	1131.72	2754.25	2.31986	1.21404	4.69442e-05	0.000472756
	SLC6A15	153.758	34.0226	0.271589	-1.8805	4.74362e-05	0.00047736
	LINC00622	6.40553	61.7487	5.32891	2.41384	4.79972e-05	0.00048265
	HMGB2	22143.6	9406.37	0.440386	-1.18316	4.80373e-05	0.000482699
	EMP2	3277.25	1387.83	0.422987	-1.24131	4.82778e-05	0.00048476
	DNAJB2	3690.53	9529.1	2.39251	1.25852	4.88847e-05	0.000490495
	GDPGP1	73.9087	8.82439	0.193911	-2.36653	4.89705e-05	0.000490996
	PLAC1	26.7987	145.401	4.27652	2.09644	4.91216e-05	0.00049215
	LATS2	965.03	2473.37	2.36945	1.24455	4.91855e-05	0.00049243
	LOC101927740	7.10118	64.2569	5.22289	2.38485	4.9434e-05	0.000494557
	ARF1	26193	60867.1	2.23264	1.15875	4.9572e-05	0.000495213
	RBBP8	1276.4	506.017	0.416873	-1.26232	4.95523e-05	0.000495213
	MLF2	20902.6	50673.7	2.37657	1.24888	4.97176e-05	0.000496306
	RPA2	5766.53	2367.81	0.434523	-1.2025	4.97768e-05	0.000496535
	C16orf91	546.791	1395.84	2.4762	1.30813	4.98141e-05	0.000496546
	NUSAP1	7538.09	2909.32	0.406044	-1.30029	4.99884e-05	0.00049792
	ANXA3	4940.79	2041.73	0.436159	-1.19707	5.00926e-05	0.000498596
	CSF2RB	1.87918	45.112	6.43073	2.68498	5.02801e-05	0.000500099
	LY6K	2018	4786.26	2.27174	1.1838	5.04517e-05	0.000501442
	BLOC1S4	366.11	966.407	2.55473	1.35317	5.08251e-05	0.000504786
	CACNG6	14.242	102.579	4.83687	2.27407	5.09547e-05	0.00050534
	CARD10	2491.6	5859.2	2.26359	1.17861	5.09483e-05	0.00050534
	ZSCAN25	873.305	2223.15	2.38455	1.25372	5.12932e-05	0.00050833
	TSEN2	316.616	95.2504	0.334827	-1.57851	5.1844e-05	0.000513416
	NUP205	1068.29	399.188	0.401211	-1.31757	5.25637e-05	0.000520168
	C19orf26	26.0213	126.468	3.89262	1.96074	5.26462e-05	0.000520442
	MYO7B	85.0134	280.189	3.0698	1.61815	5.26674e-05	0.000520442
	TMEM180	126.344	25.2031	0.253791	-1.97829	5.30825e-05	0.000524166
	CLUAP1	1153.04	444.092	0.411595	-1.2807	5.33894e-05	0.000526437
	MMP11	2218.43	5231.94	2.32252	1.21569	5.33733e-05	0.000526437
	ULK1	608.939	1504.89	2.36034	1.23899	5.3447e-05	0.000526626
	LINC00672	8.62086	70.5853	4.97153	2.31369	5.3682e-05	0.000528561
	LINC00167	0.807695	32.5068	6.60689	2.72397	5.37319e-05	0.000528672
	SDHAF1	599.333	1761.18	2.6839	1.42433	5.38033e-05	0.000528995
	OSBPL9	2329.12	944.695	0.422808	-1.24193	5.42938e-05	0.000533434
	TDP2	1453.88	582.877	0.420562	-1.24961	5.43858e-05	0.000533956
	MIPOL1	176.519	35.2706	0.2554	-1.96917	5.4641e-05	0.000536076
	FAM98B	3707.8	1402.95	0.410812	-1.28345	5.4732e-05	0.000536446
	TIMELESS	3665.53	1469.25	0.425969	-1.23118	5.4757e-05	0.000536446
	ESPN	1.55936	38.3095	6.37189	2.67172	5.48045e-05	0.000536528
	RCC2	11255.9	26216.7	2.23506	1.16031	5.5275e-05	0.000540748
	ILVBL	3930.12	1629.91	0.43704	-1.19416	5.53708e-05	0.000541298
	CENPA	1223.91	449.833	0.399987	-1.32197	5.54981e-05	0.000542155
	CLASP2	806.931	275.158	0.369573	-1.43607	5.57757e-05	0.000544479
	RAD21	9049.51	3214.43	0.376041	-1.41104	5.61189e-05	0.000547439
	TSC22D3	639.312	1765.47	2.66292	1.41301	5.62411e-05	0.00054824
	CACNA1E	3.23078	46.3674	5.88763	2.55769	5.63558e-05	0.000548968
	SOX2	2237.71	5443.31	2.32006	1.21416	5.64406e-05	0.000549404
	AKT1S1	2762.1	6802.77	2.42233	1.27639	5.67189e-05	0.00055172
	CHD4	5066.47	2168.06	0.442978	-1.17469	5.73542e-05	0.000557109
	SEMA3B	493.632	1213.81	2.40617	1.26674	5.73262e-05	0.000557109
	PUS1	2539.16	5942.61	2.25143	1.17084	5.74997e-05	0.000558126
	CDCA7L	3307.83	1365.3	0.430541	-1.21578	5.75485e-05	0.000558204
	OSGEPL1	301.518	86.4187	0.319111	-1.64787	5.78618e-05	0.00056045
	RAVER2	457.664	158.001	0.372291	-1.4255	5.78449e-05	0.00056045
	ZNF469	1418.81	3363.07	2.2739	1.18517	5.82306e-05	0.000563623
	PKDCC	1228.83	2993.72	2.40155	1.26396	5.84607e-05	0.00056545
	PHF6	1036.51	381.279	0.396098	-1.33607	5.86001e-05	0.000566398
	STPG1	926.916	2211.8	2.34102	1.22714	5.94736e-05	0.000574436
	FGF5	574.117	194.749	0.380095	-1.39557	6.01888e-05	0.000580934
	KRT14	563.745	1362.53	2.43301	1.28274	6.04806e-05	0.00058334
	FHOD1	1902.48	721.999	0.408671	-1.29099	6.06908e-05	0.000584955
	ASB2	1054.39	389.421	0.404964	-1.30413	6.07816e-05	0.000585418
	CSNK1D	14472.7	33462.7	2.22039	1.15081	6.1148e-05	0.000588533
	SH2B3	1631.85	3998.58	2.50328	1.32382	6.14026e-05	0.000590569
	SPINT2	9.676	77.6213	4.98648	2.31802	6.16695e-05	0.000592706
	TUBD1	452.918	156.26	0.3736	-1.42043	6.17114e-05	0.000592706
	APBB1	1461.48	590.279	0.425315	-1.23339	6.24297e-05	0.000599185
	AARD	117.26	22.6899	0.244074	-2.03461	6.25128e-05	0.000599562
	EID3	8.56483	84.1316	5.14201	2.36233	6.33574e-05	0.000606798
	FAM196A	1.23955	35.2779	6.38081	2.67374	6.34001e-05	0.000606798
	PAOX	860.223	328.195	0.407534	-1.29501	6.3338e-05	0.000606798
	LINC00476	129.663	400.279	2.77179	1.47082	6.39023e-05	0.000611177
	RASAL2-AS1	42.3036	169.334	3.39413	1.76304	6.44013e-05	0.00061552
	ARHGAP25	9.63631	73.3466	4.79636	2.26194	6.47137e-05	0.000618074
	GALNT3	189.993	47.1216	0.294278	-1.76475	6.47723e-05	0.000618204
	SIRT1	827.082	307.191	0.397428	-1.33123	6.50237e-05	0.000619739
	TSGA10	10.8198	77.1054	4.67503	2.22498	6.50115e-05	0.000619739
	RAB44	1.67141	38.3046	6.25787	2.64567	6.51164e-05	0.000620191
	LOC100129518	13.8265	104.374	4.65014	2.21727	6.5473e-05	0.000623154
	SFR1	218.659	59.4762	0.312845	-1.67648	6.58608e-05	0.00062641
	NUP107	1385.34	490.174	0.393741	-1.34468	6.64065e-05	0.000631162
	FAIM	437.495	150.452	0.372288	-1.42551	6.65816e-05	0.000632386
	CCDC81	541.186	194.016	0.386012	-1.37328	6.69081e-05	0.000635047
	SERAC1	329.964	103.323	0.347922	-1.52316	6.74077e-05	0.000639346
	GBAS	1703.88	696.842	0.428644	-1.22215	6.78763e-05	0.000643083
	SMARCA2	597.624	205.366	0.372332	-1.42534	6.78956e-05	0.000643083
	DICER1-AS1	8.13297	67.3032	4.94265	2.30528	6.81055e-05	0.000644181
	RPS14P3	6226.9	14664.8	2.24017	1.16361	6.80908e-05	0.000644181
	AGAP1	1953.64	4531.32	2.24355	1.16578	6.81866e-05	0.000644502
	ATF7IP	398.537	131.283	0.358676	-1.47925	6.82484e-05	0.000644641
	SMG7-AS1	4.0945	49.9099	5.593	2.48362	6.87935e-05	0.000649343
	ARMCX5	345.703	102.299	0.331564	-1.59264	6.88677e-05	0.00064959
	ZNF287	245.628	71.5778	0.328367	-1.60662	6.89146e-05	0.00064959
	ATRNL1	388.529	130.523	0.363776	-1.45888	6.95609e-05	0.000655231
	GPR183	74.9732	8.82684	0.192028	-2.38061	6.96467e-05	0.000655588
	TCTE3	0.75167	32.7623	6.46249	2.69209	7.01122e-05	0.000659517
	KCTD13	510.057	1302.29	2.54606	1.34827	7.05689e-05	0.000663357
	CEP152	287.39	75.3366	0.306956	-1.7039	7.07336e-05	0.00066445
	RFX2	405.948	138.603	0.370101	-1.43401	7.18421e-05	0.0006744
	RRP12	771.528	1870.25	2.3022	1.20301	7.19243e-05	0.000674709
	IFT22	798.955	283.828	0.375472	-1.41322	7.22108e-05	0.000676933
	ARMCX1	475.905	151.452	0.357206	-1.48517	7.28491e-05	0.000682449
	RAG1	4.99791	55.9411	5.49751	2.45878	7.42341e-05	0.000694949
	CYP27B1	211.229	584.668	2.61873	1.38887	7.46522e-05	0.000698385
	FANCG	1383.39	564.727	0.427855	-1.22481	7.47986e-05	0.000699277
	RGS4	601.94	223.551	0.395666	-1.33765	7.52274e-05	0.000702807
	CSNK2A2	2197.44	5133.81	2.23908	1.16291	7.56425e-05	0.000706203
	MTTP	3.49456	48.3892	5.72557	2.51742	7.61696e-05	0.000710639
	PHKA1	153.616	36.5529	0.283653	-1.8178	7.76893e-05	0.000724325
	DCST2	2.47911	41.3361	5.91881	2.56531	7.79758e-05	0.000725962
	TRAF5	571.997	204.15	0.388766	-1.36302	7.79641e-05	0.000725962
	ZNF581	976.085	2469.97	2.35289	1.23443	7.8024e-05	0.000725962
	TREX1	383.72	966.335	2.38665	1.25499	7.84977e-05	0.000729874
	PRR34	1.55936	37.0492	6.15689	2.6222	7.87466e-05	0.00073137
	TFAP2A	1366.97	3209.57	2.24563	1.16712	7.87654e-05	0.00073137
	TBC1D31	490.1	155.736	0.358219	-1.48109	7.8943e-05	0.000732522
	EXTL2	986.961	389.853	0.416868	-1.26234	7.94491e-05	0.000736719
	VIM-AS1	26.4135	125.5	3.80312	1.92718	7.96672e-05	0.000738242
	FAM13C	7.53304	63.7582	4.97619	2.31504	7.99097e-05	0.000739489
	KBTBD4	835.773	267.334	0.354583	-1.49581	7.987e-05	0.000739489
	LTBP2	171.054	481.787	2.60335	1.38037	8.04264e-05	0.000743767
	SNRPD2	11365.3	28438.9	2.37196	1.24608	8.12043e-05	0.000750455
	SMAD7	602.347	1433.58	2.35447	1.2354	8.18947e-05	0.000756325
	C16orf59	1246.18	500.055	0.419388	-1.25364	8.20717e-05	0.000757448
	PLXNB3	54.9069	198.841	3.16031	1.66006	8.23397e-05	0.00075941
	MELK	1416.76	550.051	0.406281	-1.29945	8.34489e-05	0.000769122
	IGF2-AS	55.9784	201.612	3.14903	1.65491	8.38532e-05	0.000772288
	MICALL2	648.649	1555.86	2.31882	1.21339	8.39051e-05	0.000772288
	S100A3	235.109	712.869	2.69905	1.43245	8.40042e-05	0.00077268
	BDKRB2	2414.8	5581.25	2.22238	1.15211	8.45972e-05	0.000777613
	ALX4	1438.04	3381.92	2.23714	1.16166	8.58919e-05	0.000788653
	GATA2	1398.37	3253.46	2.23341	1.15925	8.59134e-05	0.000788653
	CDC25A	1809.28	758.37	0.437546	-1.19249	8.60193e-05	0.000789096
	CDC34	2133.1	5063.6	2.29169	1.19641	8.63642e-05	0.00079173
	C12orf29	622.747	221.529	0.38968	-1.35964	8.72579e-05	0.000798495
	CEP290	355.892	119.476	0.365183	-1.45331	8.72771e-05	0.000798495
	WLS	2720.12	1001.12	0.39755	-1.33079	8.72456e-05	0.000798495
	LOC389641	0.43186	28.9839	6.39206	2.67628	8.75037e-05	0.000800034
	VPS37B	2247.06	5654.52	2.36758	1.24341	8.8e-05	0.000804034
	SLC29A1	1430.38	542.73	0.397903	-1.32951	8.81897e-05	0.000805231
	EME1	1096.18	441.242	0.422686	-1.24234	8.83881e-05	0.00080581
	NCAPD3	1221.31	469.233	0.411812	-1.27994	8.84296e-05	0.00080581
	RFC3	1988.04	822.512	0.432828	-1.20814	8.8414e-05	0.00080581
	DDAH2	3336.92	1401.91	0.434413	-1.20286	8.86948e-05	0.000807689
	YRDC	1306.86	3031.4	2.23547	1.16058	8.93717e-05	0.000813313
	GABPB1-AS1	148.924	436.208	2.78527	1.47782	8.96222e-05	0.00081505
	METTL23	1320.86	524.705	0.421398	-1.24674	9.02727e-05	0.000820421
	BASP1	25809.2	58800.4	2.18868	1.13006	9.03855e-05	0.000820901
	TNIP1	44246.4	103478	2.25246	1.1715	9.04967e-05	0.000821367
	ADORA1	84.9107	12.8509	0.225058	-2.15163	9.06472e-05	0.000822188
	SPTY2D1-AS1	9.26048	71.5901	4.72405	2.24002	9.07566e-05	0.000822635
	ATP6V0C	12318	29216.9	2.29796	1.20035	9.11361e-05	0.000825529
	DANCR	1080.26	3057.41	2.66478	1.41402	9.16816e-05	0.000829921
	KIF4A	1506.88	573.063	0.411215	-1.28204	9.18235e-05	0.000830657
	LCLAT1	1151.24	443.63	0.419995	-1.25156	9.23533e-05	0.000834898
	C11orf68	5837.82	13664.5	2.27017	1.1828	9.25842e-05	0.000836434
	ARV1	543.387	189.526	0.379456	-1.398	9.2688e-05	0.000836819
	DSC2	366.441	113.403	0.350952	-1.51065	9.35041e-05	0.000843632
	GBP1	1321.39	448.31	0.382991	-1.38462	9.36023e-05	0.000843961
	FAM171A1	3318.14	7516.91	2.19052	1.13127	9.39483e-05	0.000845967
	FBXL3	940.838	375.221	0.419846	-1.25207	9.39339e-05	0.000845967
	ATP2A1	10.8595	78.8816	4.69719	2.2318	9.61725e-05	0.00086532
	PPME1	1959.38	4562.6	2.24103	1.16416	9.62239e-05	0.00086532
	DDA1	3432.35	8670.48	2.50963	1.32748	9.65575e-05	0.00086775
	FOXP4	2703.18	6318.26	2.33068	1.22075	9.69831e-05	0.000871004
	ZNF524	432.427	1097.67	2.37959	1.25071	9.84447e-05	0.000883551
	NDC1	2859.61	1185.17	0.436527	-1.19586	9.87675e-05	0.000885868
	C17orf89	1181.77	3104.99	2.4118	1.27011	9.94778e-05	0.000891654
	MZT2B	6386.69	16715	2.38477	1.25385	9.9597e-05	0.000892139
	HOXA2	45.1819	2.52055	0.17226	-2.53734	9.97945e-05	0.000893324
	ADD2	514.959	186.985	0.391475	-1.35301	0.000100268	0.000896979
	LYPLAL1	567.111	202.128	0.390621	-1.35616	0.000100437	0.000897902
	JUNB	1723.48	4012.31	2.22812	1.15583	0.000101105	0.000903283
	CYB5R3	21115.8	46896.5	2.1722	1.11915	0.000101417	0.000905
	THYN1	1367.8	569.891	0.434156	-1.20371	0.000101429	0.000905
	ZBTB47	410.988	135.071	0.367864	-1.44275	0.00010194	0.000908967
	FOXF2	3936.34	8825.25	2.237	1.16156	0.000102192	0.000910616
	MCM4	6690.21	2750.25	0.439082	-1.18744	0.000102508	0.000912311
	PARK2	0.863719	32.2587	6.20075	2.63244	0.000102515	0.000912311
	IQCB1	464.94	165.831	0.384432	-1.3792	0.000103125	0.000917139
	MIR22HG	490.266	1247.67	2.5117	1.32866	0.000103504	0.000919916
	COX6B1	9279.91	24306.5	2.41979	1.27488	0.000105959	0.000941127
	ATP6V0E2-AS1	67.4612	7.56166	0.201201	-2.31329	0.000106182	0.000941883
	DKFZP434I0714	33.9862	144.389	3.5756	1.83819	0.000106162	0.000941883
	CACNG4	2219.28	759.805	0.394176	-1.34309	0.000107143	0.000948654
	L2HGDH	291.349	90.9881	0.351272	-1.50934	0.000107153	0.000948654
	MMP14	5149.96	11749.3	2.20463	1.14054	0.000107074	0.000948654
	DNAH14	349.858	117.68	0.366672	-1.44744	0.000107582	0.000951837
	GTSE1	2616.71	1097.35	0.434019	-1.20417	0.000108346	0.000957977
	AURKA	3886.45	1586.34	0.432969	-1.20767	0.00010859	0.000959515
	ITGAM	2.68687	45.1169	5.75604	2.52508	0.000108689	0.000959774
	TMEM237	1107.57	431.958	0.417238	-1.26106	0.000109416	0.000965566
	AP1S1	4744.04	10802.4	2.20953	1.14374	0.000109796	0.000967679
	PEX11A	269.915	81.1417	0.339277	-1.55946	0.000109782	0.000967679
	TARBP1	420.547	140.869	0.36966	-1.43573	0.000109901	0.000967979
	DNAJC9	3165.45	1305.16	0.439144	-1.18723	0.000110449	0.000972178
	CHAC2	328.823	109.597	0.360074	-1.47363	0.000110607	0.000972944
	NEK3	256.856	70.8016	0.318151	-1.65222	0.000111337	0.000978737
	RNASEH2B	1210.72	489.206	0.42394	-1.23807	0.000111835	0.000982487
	CYP2R1	249.263	66.0478	0.302479	-1.72509	0.000111972	0.000983059
	MIS18A	2086.61	883.491	0.434657	-1.20205	0.000112501	0.000987069
	PANX2	139.472	401.174	2.71988	1.44354	0.000112702	0.000988201
	STEAP1	284.04	74.3294	0.311489	-1.68275	0.000112935	0.00098961
	VEZF1	2677.51	1137.47	0.441064	-1.18094	0.00011301	0.000989634
	SMC4	5564.73	2440.29	0.458742	-1.12424	0.000113733	0.000995326
	EHMT2	2748.74	1164.73	0.442993	-1.17465	0.000114185	0.000998648
	NUP54	1597.58	627.95	0.416649	-1.26309	0.000114274	0.000998786
	C10orf35	96.5382	16.3836	0.237842	-2.07193	0.000115837	0.0010118
	ZNF791	194.785	537.47	2.51389	1.32992	0.000116127	0.00101368
	RHOB	8031.4	17878.3	2.21685	1.14851	0.000116313	0.00101466
	CHPF	7293.41	16352.2	2.16446	1.11401	0.00011686	0.00101878
	MATN4	14.3868	90.0078	4.20511	2.07214	0.000116995	0.00101931
	TOR3A	1389.47	550.692	0.420447	-1.25001	0.000118539	0.00103211
	ITGB2	12488.9	27885.9	2.15172	1.10549	0.000119126	0.00103638
	NKD2	83.0735	266.196	2.84953	1.51072	0.00011918	0.00103638
	MGAT3	1638.77	3720.9	2.19575	1.13471	0.00011932	0.00103694
	BRD8	2567.94	974.786	0.417275	-1.26093	0.000119518	0.001038
	GCFC2	696.758	266.402	0.410841	-1.28335	0.000119816	0.00103861
	PRKAA1	1608.32	603.955	0.396998	-1.3328	0.000119815	0.00103861
	TCEB2	23051.8	55494.9	2.21739	1.14886	0.000119706	0.00103861
	DUSP8	42.7355	174.682	3.35452	1.74611	0.000120406	0.00104306
	S100A6	27584.6	71369.5	2.34822	1.23157	0.000122879	0.00106381
	NRN1	278.111	74.5922	0.325901	-1.61749	0.000123022	0.00106438
	MAG	45.8939	194.854	3.43464	1.78016	0.000123379	0.00106679
	SOCS1	218.846	602.474	2.75747	1.46334	0.000123871	0.00107037
	SRL	2.68687	41.8275	5.65481	2.49948	0.00012397	0.00107055
	RAB33A	6.51758	57.4593	4.93981	2.30446	0.000124999	0.00107876
	EXD3	524.031	1364.91	2.40808	1.26789	0.000125168	0.00107953
	STX6	1283.45	2978.2	2.25815	1.17514	0.000125674	0.00108322
	B3GNT1	2642.65	1080.81	0.432808	-1.2082	0.000126014	0.00108546
	SLC29A2	52.0286	4.2869	0.18369	-2.44465	0.000126402	0.00108812
	NMNAT2	223.71	580.049	2.48893	1.31552	0.00012726	0.00109482
	PGS1	2371.64	5374.14	2.16886	1.11693	0.000128072	0.00110043
	SDPR	936.884	2755.53	2.6261	1.39292	0.00012807	0.00110043
	CRELD1	604.611	1433.2	2.26642	1.18041	0.000128409	0.00110262
	NIPA1	950.83	371.927	0.42225	-1.24383	0.000128865	0.00110585
	SCML2	281.855	76.5895	0.312757	-1.67689	0.000128948	0.00110587
	SURF2	2792.46	1200.44	0.431569	-1.21234	0.000130689	0.0011201
	PRCD	23.5749	111.386	3.71514	1.89342	0.000131817	0.00112906
	ALG6	215.888	62.7583	0.331886	-1.59124	0.000131914	0.00112918
	ANP32B	16434.1	7386.94	0.467278	-1.09765	0.000132405	0.00113155
	SLC12A4	3348.54	7456.62	2.15704	1.10905	0.000132345	0.00113155
	TFEC	0.75167	30.7454	6.04892	2.59668	0.000132439	0.00113155
	OTUD6B	470.485	169.582	0.386328	-1.3721	0.000132775	0.00113372
	METTL10	717.149	254.306	0.387441	-1.36795	0.000133198	0.00113662
	PCNXL2	281.251	715.211	2.41064	1.26942	0.000134444	0.00114654
	MRPS9	2910.89	1192.66	0.443156	-1.17411	0.000136226	0.00116102
	C2orf72	88.0528	12.3522	0.220829	-2.179	0.000136652	0.00116392
	CASP8	340.962	110.632	0.362619	-1.46347	0.000137556	0.00117089
	DNAJC18	1209.72	504.329	0.438843	-1.18822	0.00014154	0.0012038
	ZBTB7B	429.449	1084.75	2.39114	1.2577	0.000141597	0.0012038
	FAM200A	216.341	568.734	2.45406	1.29517	0.000144435	0.00122716
	ZNF263	1108.72	2637	2.27713	1.18722	0.000144667	0.00122837
	DDX3X	6188.54	2417.89	0.422866	-1.24173	0.000145451	0.00123426
	KIAA1462	2294.52	5342.56	2.19795	1.13616	0.000146066	0.00123871
	CLTB	8638.55	20228.4	2.28182	1.19019	0.000146862	0.00124469
	NXPE3	580.343	217.75	0.40207	-1.31448	0.000147189	0.00124669
	SYNE4	3.23078	42.8494	5.39817	2.43247	0.000148076	0.00125343
	SLC27A3	117.485	25.2055	0.272396	-1.87622	0.000148568	0.00125681
	POM121C	1779.69	4046.68	2.18932	1.13048	0.000148748	0.00125756
	NUDT12	289.085	86.9346	0.342306	-1.54664	0.000149027	0.00125915
	ZGRF1	195.135	55.4497	0.326087	-1.61667	0.000149973	0.00126636
	CNOT10	1579.26	634.391	0.435798	-1.19827	0.000151122	0.00127528
	TDRKH	332.948	111.644	0.370162	-1.43377	0.000151247	0.00127555
	CDC25C	2185.34	884.329	0.435484	-1.19931	0.000151389	0.00127595
	SOX12	2316.66	826.722	0.393176	-1.34675	0.000152143	0.00128152
	SEC61A1	30941.8	68108.6	2.14905	1.1037	0.000152367	0.00128262
	PPWD1	937.596	344.203	0.396415	-1.33492	0.000152614	0.00128391
	FERMT2	3119.75	1108.76	0.397564	-1.33074	0.000152895	0.00128469
	RING1	3944.78	1727.18	0.45535	-1.13495	0.000152867	0.00128469
	RASGRF1	68.8525	223.75	2.92915	1.55048	0.00015332	0.00128747
	PSMG3-AS1	302.342	771.855	2.51207	1.32888	0.000153444	0.00128773
	HLA-DPB1	695.395	272.684	0.417799	-1.25912	0.000154683	0.00129733
	LOC339240	49.5985	180.266	3.11891	1.64104	0.000156666	0.00131315
	ENPP5	51.8372	4.79052	0.192955	-2.37366	0.000157211	0.00131692
	FOXG1	141.017	34.0177	0.292919	-1.77142	0.000158131	0.00132382
	HMMR	2042.08	746.671	0.405871	-1.30091	0.000158465	0.0013258
	COPE	19833.5	43839.6	2.1207	1.08454	0.000159151	0.00133073
	SEC22C	2179.45	896.868	0.441958	-1.17802	0.000159277	0.00133097
	CKAP2	3381.37	1337.89	0.42848	-1.2227	0.000160248	0.00133745
	TRIM67	11.7793	75.5994	4.33627	2.11645	0.000160232	0.00133745
	CBX3	11731.5	5338.94	0.470689	-1.08715	0.000161706	0.00134716
	CIRBP-AS1	35.9774	158.033	3.57658	1.83858	0.00016168	0.00134716
	RSC1A1	110.965	321.538	2.66371	1.41344	0.000161703	0.00134716
	TPRG1L	3363.82	7558.53	2.16051	1.11137	0.000161986	0.00134867
	RHNO1	1534.22	565.471	0.416016	-1.26529	0.000162153	0.00134924
	MTA2	12135.3	26553.7	2.11219	1.07874	0.000163615	0.00136057
	HPS3	1018.22	404.129	0.409437	-1.28829	0.000164079	0.0013636
	SBF1	5723.65	12496.9	2.12595	1.08811	0.000164291	0.00136454
	LOC100630918	40.6555	180.984	3.57545	1.83813	0.000164414	0.00136474
	GPN2	1069.08	2426.25	2.17875	1.1235	0.000164698	0.00136626
	KRT7	384.54	1038.27	2.46151	1.29954	0.000165097	0.00136874
	UBN1	4309.94	9551.48	2.13007	1.0909	0.000165226	0.00136899
	PPIB	48191.6	105396	2.10629	1.0747	0.000166772	0.00138096
	RRBP1	4413.83	9800.33	2.12453	1.08714	0.000167356	0.00138496
	UBE2H	3768.22	8353.82	2.16324	1.1132	0.000167634	0.00138642
	STARD10	302.645	813.19	2.43876	1.28615	0.000169054	0.00139732
	RELB	1823.72	4066.16	2.14586	1.10155	0.000169469	0.00139991
	PER2	226.091	582.914	2.43816	1.28579	0.000170087	0.00140416
	SAA2	9.91644	68.0574	4.45257	2.15464	0.000170375	0.0014057
	ECI2	4438.47	1835.92	0.443746	-1.17219	0.000170671	0.00140645
	MSX1	1367.81	3744.19	2.39924	1.26258	0.000170629	0.00140645
	CCBL2	1259.59	524.791	0.443116	-1.17424	0.000171818	0.00141505
	KIAA2013	3387.74	7451.19	2.13754	1.09595	0.000172073	0.00141629
	HMG20B	6681.28	14931.5	2.20836	1.14298	0.00017286	0.00142191
	FAM161A	148.24	37.5553	0.300815	-1.73305	0.000173383	0.00142536
	FRA10AC1	1607.53	698.25	0.451561	-1.14701	0.00017378	0.00142705
	RHBDF2	593.499	1382.99	2.22815	1.15585	0.000173796	0.00142705
	TMEM126A	348.441	120.716	0.378199	-1.40278	0.000174628	0.00143302
	ENKUR	1.99122	35.7816	5.57963	2.48017	0.000175351	0.00143809
	UQCR11	3704.04	8619.78	2.18437	1.12722	0.00017676	0.00144878
	NFKB2	2360.87	5205.53	2.13329	1.09308	0.000177406	0.0014532
	CHMP4C	43.3751	2.77114	0.18442	-2.43893	0.00017775	0.00145515
	EXD2	566.01	208.882	0.393036	-1.34727	0.000178716	0.00146172
	TMCC2	300.112	89.2193	0.343364	-1.54219	0.000178766	0.00146172
	DYRK4	1396.69	599.555	0.448895	-1.15555	0.000179338	0.00146465
	RPS15	19360.2	44486.5	2.1701	1.11776	0.00017925	0.00146465
	TTC26	413.183	139.097	0.372862	-1.42329	0.000181815	0.00148399
	ZNF746	760.494	1835.88	2.26551	1.17983	0.00018194	0.00148413
	ARMC8	1610.55	658.666	0.428244	-1.2235	0.000182766	0.00148836
	GOLGB1	1003.01	2286.38	2.17503	1.12104	0.000182783	0.00148836
	SKA3	2597.47	1120.36	0.450129	-1.15159	0.000182785	0.00148836
	RPL18A	9446.83	21460.4	2.14808	1.10305	0.000183371	0.00149225
	ARMCX3	1244.3	498.166	0.422604	-1.24262	0.000184019	0.00149663
	LOC100133445	4.95822	49.4063	5.00067	2.32212	0.000185199	0.00150534
	MARC2	536.494	200.839	0.40188	-1.31516	0.000185841	0.00150966
	OAS1	128.482	28.7358	0.285005	-1.81094	0.000186084	0.00151022
	PLXNA1	5970.68	13195.3	2.11728	1.08221	0.000186132	0.00151022
	EFNA5	1376.64	585.238	0.4483	-1.15746	0.00018671	0.00151402
	TNNT3	4.41431	49.4112	5.0759	2.34366	0.000188603	0.00152846
	APOM	159.244	445.158	2.53249	1.34056	0.000188809	0.00152923
	ZIC1	462.91	174.13	0.40286	-1.31165	0.000189782	0.0015362
	PRPS1	5258.42	2317.35	0.459148	-1.12297	0.000190217	0.00153882
	ORAI3	216.733	566.081	2.43395	1.2833	0.000190474	0.00153998
	PLIN3	28023	60680.7	2.0976	1.06874	0.00019077	0.00154146
	PSMD5	1348.49	576.283	0.444767	-1.16888	0.00019137	0.0015454
	ZBTB37	11.5155	76.081	4.26896	2.09388	0.000192339	0.00155231
	YBX3P1	782.53	1861.29	2.23065	1.15746	0.000195954	0.00158055
	ZNF394	513.972	1202.89	2.23378	1.15949	0.000196257	0.00158207
	ARHGEF3	269.324	702.567	2.46538	1.30181	0.0001967	0.00158284
	C1GALT1C1	1020.84	371.438	0.401403	-1.31688	0.000196504	0.00158284
	LOC338694	1.61539	33.5239	5.59643	2.48451	0.00019665	0.00158284
	RPS6KA2	1199.38	2879.24	2.3861	1.25466	0.000196926	0.00158373
	NINJ1	565.359	1646.83	2.85457	1.51327	0.000197165	0.00158473
	UBL5	2633.83	6353.29	2.33063	1.22072	0.000198398	0.0015937
	SCFD1	2213.27	900.442	0.438501	-1.18935	0.000199339	0.00160029
	ZNF275	548.392	1271.23	2.22507	1.15385	0.000199452	0.00160029
	MMP25	7.10118	59.2306	4.70154	2.23313	0.000200607	0.00160862
	C2CD5	635.957	240.863	0.395471	-1.33836	0.00020114	0.00161195
	LOC101927691	6.72534	55.9386	4.70978	2.23566	0.000201407	0.0016122
	SLC35F2	426.818	158.498	0.399058	-1.32533	0.000201375	0.0016122
	MYO19	1916.75	832.589	0.45691	-1.13002	0.000201621	0.00161297
	C19orf53	3073.93	8041.41	2.50065	1.3223	0.000202142	0.00161619
	TSPAN15	639.762	218.023	0.377757	-1.40447	0.000202635	0.00161919
	BIK	94.5726	300.491	2.75137	1.46015	0.000203631	0.0016243
	COTL1	29119.7	63730.4	2.26345	1.17852	0.000203441	0.0016243
	VSIG10	703.689	281.263	0.423152	-1.24075	0.00020359	0.0016243
	DNAJC1	2653.73	1165.28	0.463355	-1.10981	0.000204765	0.0016324
	IL32	5129.56	11468.2	2.12908	1.09023	0.000205288	0.00163562
	CIT	1363.64	588.687	0.451419	-1.14746	0.000205633	0.00163741
	CTF1	108.133	324.862	2.76071	1.46504	0.000206883	0.00164473
	SIRT6	2020.53	4625.9	2.16795	1.11633	0.000206912	0.00164473
	TAC3	3.06271	45.37	5.36143	2.42262	0.000206713	0.00164473
	MRPL54	2363.37	5687.02	2.20583	1.14132	0.000207812	0.00165093
	HSPA4L	123.979	367.163	2.75279	1.46089	0.000208516	0.00165555
	CBY1	877.799	318.28	0.407399	-1.29549	0.000209385	0.00166149
	CHST3	1671.36	3699.75	2.16223	1.11252	0.000209881	0.00166447
	SOX30	167.179	39.3045	0.30414	-1.71719	0.000210705	0.00167003
	CYB5D2	818.769	1938.14	2.25975	1.17617	0.000210978	0.00167123
	WDSUB1	260.517	84.6867	0.358373	-1.48047	0.000211107	0.00167128
	ARIH2OS	31.6355	141.409	3.51709	1.81438	0.000212645	0.00168249
	PYY	9.37253	66.8045	4.39568	2.13609	0.000213159	0.00168499
	SSUH2	3.43854	47.8905	5.30047	2.40612	0.000213207	0.00168499
	UNC13A	40.121	163.865	3.24682	1.69903	0.000213677	0.00168773
	NCAPG2	4391.45	1749.65	0.43309	-1.20726	0.000215313	0.00169967
	QRSL1	848.504	340.695	0.425649	-1.23226	0.000215526	0.00170037
	MAT2A	4192.89	1857.47	0.461543	-1.11546	0.000215969	0.00170289
	EI24	1704.96	4041.35	2.28356	1.19129	0.000216424	0.00170549
	ZEB2	926.368	387.78	0.43595	-1.19777	0.000216847	0.00170784
	TAF1A	236.743	72.5753	0.347639	-1.52434	0.000217634	0.00171305
	UGCG	112.323	364.503	2.71034	1.43848	0.000220733	0.00173645
	ARHGAP5-AS1	125.965	346.96	2.5948	1.37562	0.000220965	0.00173728
	TMEM168	594.106	221.752	0.403331	-1.30996	0.000221602	0.00174128
	CCNG1	2683.81	5879.38	2.12226	1.0856	0.000222018	0.00174356
	CYHR1	1372.75	3327.05	2.28838	1.19433	0.000222529	0.00174656
	ROM1	87.4715	276.288	2.75091	1.45991	0.000223234	0.00175109
	ZNF772	80.9609	13.1015	0.239927	-2.05933	0.000223395	0.00175135
	ULBP1	113.054	321.076	2.62809	1.39401	0.000224808	0.00176143
	CSGALNACT1	153.154	412.234	2.59554	1.37604	0.000225366	0.00176478
	COX4I1	26392.2	58225	2.09485	1.06685	0.000226218	0.00176949
	LRRC49	340.77	105.323	0.350798	-1.51129	0.000226225	0.00176949
	ZHX2	416.418	152.454	0.394779	-1.34088	0.000227632	0.00177948
	RPL23AP82	190.805	490.865	2.42248	1.27649	0.000227787	0.00177967
	DNAH12	0.863719	29.9887	5.68847	2.50804	0.000228522	0.0017844
	EOGT	667.116	270.431	0.428379	-1.22304	0.000228814	0.00178566
	HPDL	39.5607	2.26752	0.185886	-2.42751	0.00022945	0.00178961
	PLLP	24.1188	108.625	3.55187	1.82858	0.000233973	0.00182384
	NBPF1	944.774	381.81	0.43124	-1.21344	0.00023428	0.00182519
	HIST1H2AE	33.2112	133.577	3.31618	1.72952	0.000234625	0.00182685
	CCDC125	180.34	51.9244	0.327904	-1.60865	0.000236069	0.00183705
	VRK2	663.349	260.801	0.416515	-1.26356	0.000236344	0.00183814
	TRMT61B	591.697	235.606	0.422905	-1.24159	0.000236781	0.0018405
	C14orf182	8.88464	62.7559	4.404	2.13882	0.000237491	0.0018443
	WDR6	2730.13	1243.22	0.466817	-1.09907	0.00023754	0.0018443
	PNMA1	3542.81	1543.07	0.449003	-1.1552	0.000237935	0.00184632
	EHD3	1116.62	462.778	0.414671	-1.26996	0.00023819	0.00184726
	ITPK1	6523.03	14124.6	2.0887	1.0626	0.000238401	0.00184785
	ABHD17A	435.1	1079.52	2.55928	1.35574	0.000238796	0.00184881
	CDKN1C	2173.21	5002.81	2.2405	1.16382	0.000238706	0.00184881
	APOL3	482.313	185.482	0.411308	-1.28171	0.000239531	0.00185346
	CEP128	408.446	141.603	0.376001	-1.41119	0.000239859	0.00185402
	PDE7A	646.268	261.305	0.427691	-1.22536	0.00024001	0.00185402
	TPD52	150.509	39.3094	0.311679	-1.68187	0.00023988	0.00185402
	CLDN23	215.444	65.527	0.344387	-1.5379	0.000240275	0.00185502
	RAB37	2415.28	5478.92	2.13429	1.09376	0.000240973	0.00185936
	DNAJC19	372.287	130.3	0.38307	-1.38432	0.000242622	0.00186998
	MIEF1	2230.5	5050.71	2.17533	1.12124	0.000242594	0.00186998
	L3MBTL2	2691.48	1215.47	0.469616	-1.09045	0.000242923	0.00187124
	ARRB2	932.502	393.907	0.444057	-1.17118	0.000243628	0.00187562
	LDB1	1182.55	2619.14	2.12886	1.09008	0.000245798	0.00189126
	TPST2	974.372	2166.29	2.1798	1.1242	0.00024742	0.00190267
	MUT	530.84	180.19	0.387234	-1.36872	0.000248164	0.00190733
	POC5	483.359	172.631	0.396265	-1.33546	0.000248618	0.0019076
	PSMD3	19048.5	42045	2.13424	1.09373	0.000248538	0.0019076
	UPF3B	1501.27	665.726	0.457945	-1.12675	0.000248401	0.0019076
	BUD13	1060.93	452.196	0.440929	-1.18138	0.000252133	0.00193349
	TRIB1	146.153	417.52	2.59851	1.37769	0.000253242	0.00194091
	ARL4D	1383.16	3107.56	2.15146	1.10532	0.000255278	0.00195516
	OAZ1	21401.2	48214.2	2.21216	1.14545	0.000255386	0.00195516
	POM121	1641.75	3838.45	2.21173	1.14517	0.000256372	0.0019616
	MEF2D	1673.18	3895.26	2.19192	1.1322	0.000256892	0.00196449
	IGSF23	23.8784	120.235	3.76364	1.91213	0.000257087	0.00196488
	KLHL4	226.638	58.7098	0.317456	-1.65537	0.000257418	0.00196631
	PML	4792.24	10251.6	2.0966	1.06805	0.000259683	0.00198251
	FOXN3	1598.84	3818.46	2.20098	1.13815	0.000259915	0.00198317
	GPAM	688.072	266.113	0.416992	-1.26191	0.0002604	0.00198577
	LYRM1	713.379	1865.32	2.38993	1.25697	0.000260805	0.00198664
	TICRR	553.677	217.767	0.415647	-1.26657	0.000260709	0.00198664
	ABCB6	977.423	2185.58	2.17676	1.12218	0.000261302	0.00198933
	C8G	16.3056	90.7448	3.9153	1.96912	0.000261528	0.00198993
	NECAP1	1532.37	680.547	0.457781	-1.12727	0.00026206	0.00199288
	CPA5	14.1463	83.9325	4.07405	2.02646	0.000262309	0.00199366
	DLAT	1178.31	477.873	0.441523	-1.17944	0.000263515	0.00200172
	BAHCC1	855.02	1910.33	2.1441	1.10037	0.000263845	0.00200312
	FAR2	182.485	44.3456	0.302906	-1.72306	0.000265195	0.00201225
	DALRD3	953.241	407.052	0.445989	-1.16492	0.000267527	0.00202882
	FBXO4	260.533	86.9542	0.366972	-1.44626	0.000267737	0.00202929
	MVB12B	686.837	1583.06	2.27174	1.18379	0.000267944	0.00202973
	BIN3	1663.19	3743.16	2.13797	1.09624	0.00026865	0.00203396
	DYRK2	573.431	1304.3	2.19437	1.13381	0.000270191	0.00204449
	GADD45B	5031.19	11322.2	2.2004	1.13776	0.000270512	0.00204579
	UBAC2-AS1	70.2204	231.881	2.90412	1.5381	0.00027187	0.00205493
	SAMD9L	259.408	80.3851	0.353266	-1.50117	0.000272227	0.00205649
	CCDC94	2391.43	5181.12	2.08465	1.05981	0.000274009	0.00206881
	PROSC	1876.6	838.976	0.465773	-1.1023	0.000276438	0.00208601
	KNSTRN	3402.7	1551.74	0.475414	-1.07274	0.000276711	0.00208691
	NTHL1	1819.52	808.83	0.465827	-1.10213	0.000278634	0.00210026
	FER1L4	6.19777	53.4475	4.63877	2.21374	0.000279006	0.00210191
	CEP57L1	458.74	171.11	0.404178	-1.30694	0.000279232	0.00210245
	CDO1	675.856	271.394	0.425651	-1.23226	0.000279619	0.00210421
	C17orf49	274.971	678.15	2.36785	1.24358	0.000281385	0.00211633
	HOXB2	166.364	34.0299	0.276819	-1.85299	0.000281839	0.00211859
	C4orf48	429.764	1074.99	2.2584	1.1753	0.000282753	0.00212429
	DBH-AS1	265.141	645.94	2.31809	1.21294	0.000286454	0.00215091
	MAP3K3	2076.42	4761.2	2.24045	1.16379	0.000286805	0.00215237
	C18orf25	827.399	1863.07	2.15985	1.11093	0.000287278	0.00215474
	RPL37	6819.81	16510.7	2.22326	1.15268	0.000287544	0.00215556
	DUSP19	78.1853	13.1039	0.24675	-2.01888	0.000288086	0.00215844
	GUCY1B3	140.772	32.0007	0.291383	-1.77901	0.000288726	0.00216205
	CPEB2	11.4034	71.826	4.18137	2.06398	0.000288912	0.00216226
	ETFDH	445.451	164.819	0.40389	-1.30797	0.000289212	0.00216332
	TOPBP1	1980.36	890.25	0.46536	-1.10358	0.000290539	0.00217206
	MTPAP	787.33	301.427	0.423015	-1.24122	0.000290705	0.00217212
	ZNF319	666.091	1502.79	2.15702	1.10904	0.000291305	0.00217542
	ARHGEF39	302.64	106.576	0.382021	-1.38828	0.000292143	0.00218049
	HIST3H2A	40.8796	159.542	3.26976	1.70919	0.000292488	0.00218187
	ZNF441	85.576	257.043	2.7232	1.4453	0.000292976	0.00218432
	PANK1	159.809	435.51	2.53482	1.34188	0.000293449	0.00218599
	TMEM53	145.233	37.5626	0.301321	-1.73063	0.000293519	0.00218599
	TOM1L1	1427.63	569.94	0.419614	-1.25286	0.000294087	0.00218903
	FRMD8P1	36.6007	140.34	3.36612	1.75109	0.000294466	0.00219066
	NUP133	1079.34	413.796	0.422045	-1.24453	0.000295158	0.00219224
	RPL35	35093	83793.9	2.17075	1.11819	0.000295143	0.00219224
	UBA6	887.993	360.65	0.437454	-1.1928	0.000295027	0.00219224
	NSL1	2163.35	970.669	0.469917	-1.08952	0.000295936	0.00219683
	COX5B	7581.95	18783.2	2.27689	1.18707	0.000298487	0.00221336
	PIBF1	342.049	115.415	0.377235	-1.40647	0.000298373	0.00221336
	TKT	24837.9	53150.6	2.14857	1.10338	0.000298687	0.00221365
	ZNF70	82.3755	245.926	2.70336	1.43475	0.000299313	0.00221709
	EPB41L3	1802.17	774.734	0.436075	-1.19735	0.000299666	0.0022185
	ASB15	2.36706	36.2925	5.21394	2.38237	0.000300558	0.0022227
	CRYAB	31.5958	125.75	3.28381	1.71537	0.000300467	0.0022227
	P2RX1	980.462	2159.63	2.1188	1.08325	0.000300754	0.00222295
	GEMIN6	1203.16	523.234	0.453062	-1.14222	0.00030107	0.00222408
	SORBS1	101.858	318.74	2.78361	1.47695	0.000302936	0.00223666
	COL7A1	1832.2	4139.94	2.1394	1.0972	0.000303863	0.00224168
	FANCA	1288.21	568.097	0.460371	-1.11913	0.000304107	0.00224168
	SEMA4A	8.07695	59.4664	4.41003	2.14079	0.000303975	0.00224168
	ZNF260	201.074	61.4907	0.347591	-1.52454	0.000305304	0.0022493
	WTIP	601.175	1374.1	2.2562	1.1739	0.000305801	0.00225175
	FBRS	2768.39	6019.42	2.10611	1.07458	0.00030642	0.00225509
	ORAOV1	1618.62	3745.59	2.32941	1.21996	0.000306804	0.00225671
	LRRC38	3.49456	41.5769	5.01911	2.32743	0.000308156	0.00226543
	CWC27	1565.85	688.084	0.463648	-1.1089	0.000308723	0.00226838
	ARNTL	632.432	213.412	0.375777	-1.41205	0.000308975	0.00226902
	RAD51	3117.55	1426.21	0.476735	-1.06874	0.000309371	0.00227071
	NFU1	3762.54	1750.61	0.475237	-1.07328	0.000309539	0.00227073
	AMPH	467.753	168.826	0.3929	-1.34777	0.000310265	0.00227483
	SELM	5406.72	13113.7	2.32609	1.21791	0.000312719	0.0022916
	SMTN	5575	12075.3	2.1005	1.07073	0.000314116	0.00230061
	RRAGA	589.963	219.713	0.398782	-1.32633	0.00031483	0.0023046
	VPS54	630.495	251.962	0.418282	-1.25745	0.000316014	0.00231204
	DPM3	1168.16	2797.8	2.24953	1.16963	0.000316689	0.00231399
	MST4	531.311	205.875	0.414365	-1.27103	0.000316811	0.00231399
	PLEKHG2	1131.28	494.208	0.45718	-1.12917	0.000316465	0.00231399
	SH3GL1	10954.4	23208.2	2.04806	1.03426	0.000316957	0.00231399
	MTBP	223.902	64.51	0.339595	-1.55811	0.000318453	0.00232367
	WEE1	446.356	170.081	0.405591	-1.3019	0.000319054	0.00232681
	GREM1	763.094	295.522	0.432785	-1.20828	0.000319745	0.00233062
	ZNHIT1	6624.31	15666.3	2.16116	1.1118	0.00032082	0.00233721
	SRA1	6260.02	14444.2	2.17716	1.12245	0.000322313	0.00234683
	DPP9	4906.39	10406.4	2.05077	1.03617	0.000322778	0.00234897
	PRAM1	2.1593	37.5553	5.29759	2.40534	0.000323233	0.00235103
	COQ10A	332.336	120.704	0.393705	-1.34481	0.000325563	0.00236547
	LINC00472	12.643	73.3295	4.0122	2.00439	0.000325531	0.00236547
	IL18	101.146	21.4223	0.27776	-1.84809	0.000326051	0.00236776
	GSK3B	2787.82	5952.47	2.06104	1.04337	0.000326589	0.00237041
	MARK1	185.985	55.6979	0.341831	-1.54865	0.000327861	0.00237838
	BPNT1	1135.42	470.243	0.442359	-1.17671	0.000328331	0.00237949
	SLC22A5	248.698	82.4044	0.368352	-1.44084	0.000328535	0.00237949
	SYCE2	53.6837	182.996	2.92971	1.55076	0.000328495	0.00237949
	LETM1	892.134	1956.66	2.11763	1.08245	0.000330068	0.00238933
	CASP3	2262.46	4901.15	2.08502	1.06006	0.000330628	0.00239212
	MPRIP	13417.3	28294.1	2.03786	1.02706	0.000330806	0.00239214
	ZFP69	128.309	31.7452	0.302837	-1.72339	0.000333716	0.00241191
	TET2	305.74	106.846	0.383477	-1.38279	0.000334794	0.00241843
	LPL	1951.81	754.071	0.435024	-1.20083	0.00033564	0.00242326
	FSD1	593.511	239.204	0.421884	-1.24508	0.000336609	0.00242898
	EHHADH	271.915	89.2119	0.370082	-1.43408	0.00033687	0.00242958
	FAM179B	206.107	59.2109	0.333105	-1.58595	0.000337918	0.00243585
	HEATR2	2252.85	911.394	0.430295	-1.2166	0.000340232	0.00245101
	IRF1	2425.77	5211.14	2.06452	1.04581	0.000340379	0.00245101
	KHK	130.151	32.7623	0.306581	-1.70566	0.000340557	0.00245101
	PCSK1N	366.497	882.867	2.28425	1.19172	0.000341952	0.00245975
	PDLIM4	9411.79	20515	2.06051	1.043	0.000342344	0.00246128
	ABHD12	7715.65	16713.3	2.10974	1.07706	0.000343245	0.00246647
	GPBAR1	35.4825	134.321	3.17395	1.66628	0.00034367	0.00246823
	KCNIP1	49.4935	171.658	2.96051	1.56585	0.000344065	0.00246977
	NDUFA11	17534.8	38947.7	2.08818	1.06225	0.000344671	0.00247236
	NDUFA13	24549	56513.1	2.11925	1.08355	0.000344788	0.00247236
	SCAMP1-AS1	42.9666	160.79	3.21838	1.68634	0.000348948	0.00250088
	SERTAD3	730.59	1686.16	2.18919	1.1304	0.000349741	0.00250526
	BMPER	165.561	45.8589	0.324887	-1.62199	0.000350346	0.00250828
	CLDN12	390.112	143.654	0.400037	-1.32179	0.000352141	0.00251981
	CC2D2A	101.562	20.6607	0.272737	-1.87442	0.000353042	0.00252494
	AGRN	4509.67	9544.72	2.04904	1.03495	0.00035385	0.0025294
	GATS	183.071	528.818	2.63345	1.39696	0.000357035	0.00255084
	TSPAN4	3309.62	7015.73	2.04795	1.03418	0.000358566	0.00256044
	IGFN1	148.056	389.644	2.43993	1.28684	0.000359846	0.00256824
	CEP78	1010.35	410.723	0.430001	-1.21759	0.000360542	0.00257053
	SEZ6	1.67141	32.0081	5.25707	2.39426	0.000360515	0.00257053
	PDHB	7746.27	3367.02	0.46737	-1.09736	0.000361086	0.00257307
	HELZ2	410.897	944.24	2.19262	1.13266	0.000361659	0.00257581
	CAPRIN2	605.584	237.08	0.406784	-1.29767	0.000362287	0.00257894
	C19orf82	73.7477	232.395	2.77	1.46989	0.000363208	0.00258294
	UROS	1767.33	4371.08	2.24755	1.16835	0.000363226	0.00258294
	SH3BP4	5979.96	14093.6	2.18348	1.12663	0.00036372	0.00258511
	ZNRF3-AS1	4.84617	46.3797	4.70204	2.23329	0.00036531	0.00259507
	PREB	4910.5	10324.8	2.04084	1.02916	0.000365591	0.00259572
	LINC00936	43.207	154.233	3.06422	1.61552	0.000367403	0.00260588
	NUP155	1210.24	485.189	0.444215	-1.17067	0.000367395	0.00260588
	LOC100288637	151.403	40.5647	0.32277	-1.63142	0.000369663	0.0026192
	ZMIZ1	2494.52	6111.86	2.21536	1.14754	0.000369612	0.0026192
	DGKZ	1296.66	2849.15	2.11307	1.07934	0.000370426	0.00262325
	TMEM259	5442.86	11726.7	2.09174	1.0647	0.000371134	0.0026269
	PTK2B	129.404	354.816	2.60069	1.3789	0.000372757	0.00263702
	STRBP	726.335	307.23	0.445552	-1.16633	0.000373193	0.00263874
	ATE1	743.546	309.733	0.442951	-1.17478	0.0003783	0.00267348
	SLC46A3	298.303	105.844	0.388619	-1.36357	0.000380836	0.00269001
	ZDHHC17	487.561	186.216	0.410471	-1.28465	0.000381446	0.00269293
	TNFAIP3	548.903	1236.84	2.15498	1.10767	0.000382557	0.00269938
	MRPL46	1877.42	857.888	0.475505	-1.07247	0.000385388	0.00271796
	CLN3	1386.03	621.756	0.467312	-1.09754	0.000385951	0.00272053
	CSF1	8415.75	18364.3	2.08594	1.0607	0.000389073	0.00274112
	TTC8	638.922	233.559	0.392023	-1.35099	0.000390099	0.00274694
	NTN1	6538.3	14204.5	2.07153	1.0507	0.000391305	0.00275402
	PTGER2	52.7383	5.29169	0.214744	-2.21931	0.000392527	0.00276119
	CBS	6010.23	2828.86	0.489461	-1.03074	0.000395036	0.00277672
	ITGB3BP	1349.53	605.186	0.46299	-1.11095	0.000395164	0.00277672
	ZFC3H1	347.759	836.402	2.30211	1.20296	0.000395342	0.00277672
	PCYT1A	1311.94	2828.1	2.07969	1.05637	0.000397681	0.00279172
	GLI4	291.835	688.291	2.24539	1.16697	0.000398098	0.00279321
	ARL8A	1766.4	4019.28	2.29279	1.1971	0.000399252	0.00279988
	AK1	3563.3	7808.5	2.07395	1.05238	0.00040355	0.00282623
	BBS10	406.982	152.452	0.404543	-1.30563	0.000403629	0.00282623
	HIST1H3H	27.5807	112.877	3.38714	1.76007	0.000403247	0.00282623
	IGFBP4	4047.38	8856.15	2.14299	1.09963	0.000404575	0.00283133
	SCRIB	3192.88	6977.82	2.07896	1.05586	0.000404771	0.00283133
	NAV1	1465.95	648.913	0.464389	-1.1066	0.000406749	0.00284372
	LINC01004	37.5298	139.891	3.10332	1.63381	0.000408169	0.00285218
	DTX3	16091.7	7222.51	0.473691	-1.07798	0.000409	0.00285653
	SERTAD4	257.944	89.2413	0.369336	-1.43699	0.000410283	0.00286404
	LRPAP1	9585.39	19989.8	2.02221	1.01593	0.000411272	0.00286948
	RPL29	19847.9	45133.2	2.113	1.07929	0.000411844	0.002872
	NUDT22	2651.73	1160.45	0.454858	-1.13651	0.000412389	0.00287434
	SCG2	224.133	570.77	2.40236	1.26445	0.000412989	0.00287706
	ZBTB14	324.649	116.933	0.395155	-1.33951	0.000417979	0.00291034
	INO80	1694.75	3604.97	2.0542	1.03858	0.00041829	0.00291102
	C1orf21	721.68	280.231	0.427321	-1.22661	0.000420036	0.00292169
	AHI1	480.924	193.827	0.426651	-1.22887	0.000420753	0.0029238
	NFYB	968.26	425.126	0.459758	-1.12105	0.000420766	0.0029238
	NFIA	400.983	146.949	0.408318	-1.29224	0.000421184	0.00292522
	C1orf110	171.743	49.6593	0.32929	-1.60257	0.000422355	0.00293187
	SMAD6	785.283	1733.91	2.21455	1.14702	0.000423391	0.00293757
	SLC11A2	591.966	245.715	0.439209	-1.18702	0.000424226	0.00294187
	CPAMD8	2.53513	36.295	5.03988	2.33339	0.000424738	0.00294393
	NUTF2	5845.02	13251.5	2.1933	1.1331	0.000426571	0.00295514
	GSTCD	579.836	229.796	0.419026	-1.25489	0.000427687	0.00295988
	KCNK7	18.9528	96.0488	3.62505	1.858	0.000427598	0.00295988
	MCM8	1305.82	582.985	0.469153	-1.09187	0.000429375	0.00297006
	LRRC17	565.356	153.985	0.357617	-1.48351	0.000432224	0.00298826
	ACSS3	209.643	62.5004	0.350732	-1.51156	0.000433055	0.00299249
	METTL21A	288.487	90.2486	0.346617	-1.52858	0.000433919	0.00299544
	SEC23B	2812.5	1150.9	0.446307	-1.16389	0.000433841	0.00299544
	AEBP1	4.03847	41.8324	4.74127	2.24527	0.000437588	0.00301773
	SP6	15.4419	79.6284	3.75064	1.90714	0.000437377	0.00301773
	NECAP2	6565.43	13657.7	2.01729	1.01242	0.000439295	0.00302797
	DNAJC24	456.625	177.203	0.408594	-1.29126	0.000441442	0.00304124
	SPAST	353.889	129.511	0.394449	-1.34209	0.000441827	0.00304236
	EIF5A	33722.5	74405.6	2.18879	1.13013	0.000442993	0.00304886
	ETV4	5479.52	2483.98	0.475504	-1.07247	0.000443281	0.00304931
	CLOCK	1591.1	727.649	0.474009	-1.07701	0.000444784	0.00305811
	AOC2	48.9729	165.578	2.93432	1.55303	0.000445816	0.00306349
	FBXW5	2722.23	5876.32	2.0991	1.06977	0.000446013	0.00306349
	SCCPDH	3720.79	1748.18	0.48898	-1.03215	0.000446543	0.00306559
	ZFAND3	3231.39	6753.41	2.0623	1.04426	0.000448919	0.00308036
	CLDN15	59.7834	204.388	3.07297	1.61963	0.000449945	0.00308585
	SOGA3	171.67	50.6469	0.340103	-1.55596	0.000451103	0.00309225
[truncated: 2,149 more rows]
