# Supplementary material for: Identification of a core TP53 transcriptional program with highly distributed tumor suppressive activity
Source: HighWire-hosted journal article supplement (doi:10.1101/gr.220533.117), 2017-09-13
Supplement: Supplemental_File_S4_TP53_ChIPseq_data.xlsx [file Supplemental_File_S4_TP53_ChIPseq_data.xlsx]

## Sheet: HCT116
TP53 ChIP-seq - HCT116 - HOMER Peak Results (Nutlin vs. Input)
	Chromosome	Start	End	Closest gene (by TSS) ID	Distance peak to TSS	Normalized read count	Fold change (vs input)	p-value (vs input)
	chr1	818390	818612	FAM41C	6208	22	34.72	4.81e-79
	chr1	1153315	1153537	TNFRSF4	3767	12.5	13.19	1.07e-29
	chr1	1186315	1186537	FAM132A	4213	38.1	240.26	6.82e-236
	chr1	1214207	1214429	SCNN1D	1388	5.06	15.97	3e-13
	chr1	1241975	1242197	ACAP3	1073	7.27	45.83	1.29e-28
	chr1	1310527	1310749	AURKAIP1	0	8.59	9.03	3.9e-17
	chr1	1400278	1400500	ATAD3B	6665	11.7	12.27	2.19e-26
	chr1	1838980	1839202	CALML6	7065	17.2	13.54	2.78e-41
	chr1	2159090	2159312	SKI	823	29.9	15.74	3.41e-76
	chr1	2921187	2921409	ACTRT2	16638	4.4	27.78	1.19e-14
	chr1	3408426	3408648	ARHGEF16	37279	14.8	11.63	1.8e-32
	chr1	3514882	3515104	MEGF6	12956	5.5	17.36	1.09e-15
	chr1	3588580	3588802	WRAP73	21909	6.83	21.53	7.54e-21
	chr1	3597684	3597906	TP73	16705	11.4	18.05	2.64e-32
	chr1	4402999	4403221	LOC284661	68891	7.71	12.15	3.98e-18
	chr1	4591056	4591278	LOC284661	118945	5.5	34.72	1.3e-20
	chr1	5143952	5144174	AJAP1	428847	10.6	33.33	4.36e-38
	chr1	6134372	6134594	KCNAB2	28391	35.7	28.12	2.59e-117
	chr1	6474605	6474827	HES2	5153	70.5	31.74	3.44e-242
	chr1	6618822	6619044	TAS1R1	3484	21.4	16.84	1.16e-56
	chr1	6709886	6710108	THAP3	24676	23.1	24.3	1.91e-71
	chr1	6924802	6925024	CAMTA1	79418	27.3	28.7	2.29e-91
	chr1	8412013	8412235	SLC45A1	33868	22.5	35.41	1.37e-80
	chr1	8427563	8427785	SLC45A1	49418	21.4	22.45	1.32e-64
	chr1	8600396	8600618	RERE	116649	10.6	8.33	1.76e-19
	chr1	9242108	9242330	MIR34A	30272	297	312.24	0
	chr1	9249150	9249372	MIR34A	37314	4.84	30.55	1.42e-17
	chr1	9590789	9591011	SLC25A33	8518	12.8	10.07	3.01e-26
	chr1	10143249	10143471	UBE4B	50208	11.7	18.4	2.64e-32
	chr1	10166915	10167137	UBE4B	73874	10.8	8.51	2.07e-20
	chr1	10804676	10804898	CASZ1	51836	45.1	284.7	4.04e-289
	chr1	10969932	10970154	C1orf127	71941	14.5	15.28	1.32e-36
	chr1	11086191	11086413	TARDBP	13512	17.2	18.05	1.33e-47
	chr1	11619382	11619604	LOC101929181	49985	19.4	61.11	7.37e-85
	chr1	12267225	12267447	MIR4632	15455	45.6	23.96	1.27e-139
	chr1	12292399	12292621	VPS13D	2286	13	8.19	8.55e-23
	chr1	12344625	12344847	VPS13D	54512	8.81	13.89	1.8e-21
	chr1	12678373	12678595	DHRS3	636	53.7	33.89	2.17e-189
	chr1	12700618	12700840	AADACL4	3727	15.2	23.96	7.68e-47
	chr1	15059665	15059887	KAZN	190739	22.5	14.17	5.13e-54
	chr1	15234000	15234222	KAZN	16404	19.8	62.49	1.19e-86
	chr1	15373031	15373253	TMEM51-AS1	105708	10.6	33.33	4.36e-38
	chr1	15499497	15499719	C1orf195	1377	7.27	22.91	3.42e-22
	chr1	15629678	15629900	FHAD1	55910	15.4	24.3	3.2e-48
	chr1	16001030	16001252	PLEKHM2	9576	9.91	15.62	3.77e-26
	chr1	16243031	16243253	ZBTB17	59375	22.7	17.88	1.27e-61
	chr1	16393216	16393438	FAM131C	6690	8.59	9.03	3.9e-17
	chr1	16479012	16479234	EPHA2	3349	10.1	15.97	3.77e-26
	chr1	16511194	16511416	ARHGEF19	27689	35.4	18.63	3.52e-97
	chr1	16723133	16723355	SZRD1	29608	11.7	73.6	2.37e-53
	chr1	16819343	16819565	CROCCP3	147	27.1	21.35	1.02e-79
	chr1	16840378	16840600	CROCCP3	21182	16.3	8.56	8.76e-30
	chr1	16886261	16886483	NBPF1	53618	117.4	28.47	0
	chr1	17252152	17252374	CROCC	3707	10.1	15.97	3.77e-26
	chr1	17591738	17591960	PADI3	16145	5.94	18.75	6.06e-17
	chr1	17636278	17636500	PADI4	1588	31.9	20.14	5.99e-91
	chr1	17770022	17770244	RCC2	3772	25.1	13.19	8.92e-59
	chr1	17818663	17818885	ARHGEF10L	47446	45.6	71.87	3.97e-206
	chr1	18284421	18284643	IGSF21	149598	13.9	43.75	6.23e-54
	chr1	18492150	18492372	IGSF21	57910	13.2	10.42	2.93e-27
	chr1	18519543	18519765	IGSF21	85303	15.6	24.65	1.3e-49
	chr1	19008268	19008490	PAX7	50768	12.1	19.1	7.5e-35
	chr1	19249480	19249702	ALDH4A1	20187	5.06	31.94	1.42e-17
	chr1	19324832	19325054	IFFO2	42006	6.61	10.42	6.44e-14
	chr1	20460142	20460364	PLA2G2F	5460	91.2	95.82	0
	chr1	21210364	21210586	HP1BP3	97183	28.4	11.2	5.29e-60
	chr1	21723082	21723304	NBPF3	43280	28.8	30.32	3.02e-97
	chr1	22056948	22057170	USP48	52519	42.5	26.8	1.61e-137
	chr1	22107706	22107928	USP48	1761	8.15	25.69	2.47e-26
	chr1	22197803	22198025	LDLRAD2	59045	10.8	34.02	1.28e-39
	chr1	22282357	22282579	HSPG2	18567	10.3	8.16	1.46e-18
	chr1	22301281	22301503	CELA3B	1916	21.8	17.19	6.83e-58
	chr1	22373324	22373546	CDC42	5575	5.72	18.05	6.06e-17
	chr1	22385020	22385242	CDC42	5900	13.4	14.12	4.17e-33
	chr1	23144014	23144236	MIR4253	45484	76.4	34.42	1.54e-269
	chr1	23512434	23512656	HTR1D	8567	13.4	42.36	2.68e-52
	chr1	23581450	23581672	LINC01355	30340	10.1	15.97	3.77e-26
	chr1	23703916	23704138	ZNF436	7559	14.3	9.03	1.8e-27
	chr1	23919165	23919387	ID3	32880	110.3	57.98	0
	chr1	23988442	23988664	RPL11	29606	6.83	21.53	7.54e-21
	chr1	24160677	24160899	HMGCL	8728	26.2	41.32	1.41e-99
	chr1	24192055	24192277	FUCA1	2583	38.7	20.37	2.27e-111
	chr1	24455811	24456033	IL22RA1	13743	31.9	33.56	2.83e-112
	chr1	24646102	24646324	GRHL3	46	13.9	87.49	1.14e-66
	chr1	24745516	24745738	NIPAL3	3271	23.8	18.75	2.09e-65
	chr1	25298843	25299065	RUNX3	42073	46.2	36.46	4.65e-167
	chr1	25418864	25419086	SYF2	139928	7.71	24.3	6.18e-25
	chr1	26075073	26075295	SEPN1	51373	9.25	9.72	4.29e-19
	chr1	26464798	26465020	FAM110D	20492	4.84	15.28	3e-13
	chr1	26656280	26656502	CD52	11869	5.28	33.33	4.42e-19
	chr1	26728482	26728704	LIN28A	8566	8.15	8.56	3.07e-15
	chr1	27187714	27187936	SFN	1698	31.3	24.65	2.03e-97
	chr1	27193496	27193718	SFN	3863	7.93	50	5.83e-32
	chr1	27204944	27205166	GPN2	11704	9.25	14.58	8.8e-24
	chr1	27669459	27669681	SYTL1	976	20.5	32.29	2.03e-71
	chr1	27803816	27804038	WASF2	12641	16.5	13.02	4.98e-39
	chr1	27869470	27869692	WASF2	52792	33.5	52.77	5.17e-138
	chr1	27963287	27963509	FGR	10536	10.1	31.94	4.62e-35
	chr1	28568424	28568646	ATPIF1	5822	24.2	12.73	1.97e-55
	chr1	28619262	28619484	SESN2	33299	8.81	9.26	3.9e-17
	chr1	28678862	28679084	PHACTR4	17010	114.5	45.13	0
	chr1	28699860	28700082	PHACTR4	3767	41.2	64.92	1.88e-180
	chr1	29517846	29518068	SRSF4	9209	11	69.44	1.2e-49
	chr1	29565820	29566042	PTPRU	2792	52	54.62	1.49e-215
	chr1	30182741	30182963	LOC101929406	327497	97.3	43.85	0
	chr1	30216135	30216357	LOC101929406	294103	7.27	22.91	3.42e-22
	chr1	30272042	30272264	LOC101929406	238196	15.6	24.65	1.3e-49
	chr1	30460616	30460838	LOC101929406	49622	70.2	110.75	0
	chr1	31221037	31221259	MIR4420	8958	26.9	84.71	1.12e-127
	chr1	31520542	31520764	PUM1	17801	50.6	39.93	3.4e-189
	chr1	31939639	31939861	LINC01225	31979	36.5	16.47	5.09e-95
	chr1	32219236	32219458	MIR4254	4879	11.4	72.22	2.37e-53
	chr1	32529984	32530206	TMEM39B	8298	20.3	21.29	3.02e-59
	chr1	32698640	32698862	MTMR9LP	8450	34.1	21.53	3.55e-100
	chr1	33282821	33283043	S100PBP	1	6.38	10.07	6.44e-14
	chr1	33936263	33936485	ZSCAN20	1748	12.8	10.07	3.01e-26
	chr1	34883790	34884012	C1orf94	241237	5.72	18.05	6.06e-17
	chr1	35220862	35221084	GJB5	214	8.59	9.03	3.9e-17
	chr1	37182809	37183031	CSF3R	233894	20	31.59	6.5e-70
	chr1	37566086	37566308	MIR4255	60857	51.1	161.1	4.88e-288
	chr1	38029136	38029358	DNALI1	6616	7.93	12.5	3.98e-18
	chr1	38300399	38300621	MTF1	24672	11.9	18.75	1.43e-33
	chr1	38390606	38390828	INPP5B	21902	48.7	306.92	2.65e-316
	chr1	38412669	38412891	INPP5B	0	82.8	261.09	0
	chr1	38583373	38583595	MIR3659	28470	7.49	47.22	2.8e-30
	chr1	38752918	38753140	LINC01343	72479	12.5	79.16	5.41e-59
	chr1	38968578	38968800	LINC01343	288139	9.25	9.72	4.29e-19
	chr1	38980291	38980513	LINC01343	299852	18.3	57.63	9.24e-78
	chr1	39302886	39303108	RRAGC	22388	10.1	10.65	4.13e-21
	chr1	39367196	39367418	GJA9-MYCBP	19898	16.7	52.77	4.65e-69
	chr1	39367196	39367418	GJA9	19898	16.7	52.77	4.65e-69
	chr1	39487619	39487841	NDUFS5	4127	12.3	19.44	7.5e-35
	chr1	39493539	39493761	NDUFS5	1572	21.6	22.68	5.84e-66
	chr1	39812643	39812865	KIAA0754	62312	39.2	24.72	5.44e-122
	chr1	39943734	39943956	BMP8A	13363	13	8.19	8.55e-23
	chr1	40268604	40268826	BMP8B	14071	16.3	17.13	7.34e-44
	chr1	40442617	40442839	MFSD2A	21833	77.7	61.28	0
	chr1	40729779	40730001	ZMPSTE24	6057	7.49	11.8	4.79e-17
	chr1	41168522	41168744	NFYC-AS1	10589	15.4	8.1	5.11e-27
	chr1	41177173	41177395	NFYC-AS1	19240	19.4	20.37	1.31e-56
	chr1	41201991	41202213	MIR30E	17815	9.69	10.18	4.28e-20
	chr1	41235535	41235757	MIR30C1	12579	31.5	99.3	3.98e-157
	chr1	41333052	41333274	CITED4	5034	6.38	20.14	1.59e-19
	chr1	41352376	41352598	CITED4	24358	59.2	62.26	3.66e-256
	chr1	41472661	41472883	SLFNL1-AS1	7380	30.6	24.13	1.21e-94
	chr1	41878402	41878624	FOXO6	50799	6.83	10.76	6.11e-15
	chr1	41939570	41939792	EDN2	10553	11.2	35.41	3.66e-41
	chr1	41947998	41948220	EDN2	2125	108.3	341.64	0
	chr1	42081906	42082128	EDN2	131562	18.7	8.43	5.4e-34
	chr1	42657854	42658076	GUCA2A	27459	11.9	12.5	1.77e-27
	chr1	42872806	42873028	RIMKLA	26338	18.1	11.39	1.44e-38
	chr1	42998848	42999070	CCDC30	1491	62.1	391.63	0
	chr1	43187677	43187899	CLDN19	18027	22	23.15	2.54e-67
	chr1	43618573	43618795	FAM183A	4979	88.7	279.84	0
	chr1	44047970	44048192	PTPRF	51423	21.4	11.23	1.02e-45
	chr1	45265502	45265724	PLK3	313	72	227.06	0
	chr1	45379520	45379742	PTCH2	70904	6.83	10.76	6.11e-15
	chr1	46023267	46023489	AKR1A1	6812	20.3	12.78	4e-46
	chr1	46079000	46079222	CCDC17	10510	8.59	9.03	3.9e-17
	chr1	46423171	46423393	MAST2	153886	81.5	32.12	6.27e-280
	chr1	46648904	46649126	TSPAN1	8155	11.2	11.8	2.63e-25
	chr1	46822877	46823099	NSUN4	17028	26.9	28.24	1.86e-88
	chr1	47105302	47105524	MOB3C	22739	22.5	17.71	2.26e-60
	chr1	48198295	48198517	TRABD2B	264046	17.2	18.05	1.33e-47
	chr1	48534211	48534433	TRABD2B	71649	11.4	36.11	1.02e-42
	chr1	48691278	48691500	SLC5A9	2921	11.7	36.8	1.02e-42
	chr1	48760463	48760685	SLC5A9	72106	23.6	18.57	2.09e-65
	chr1	49020994	49021216	SPATA6	83114	15	47.22	1.45e-60
	chr1	50604961	50605183	ELAVL4	91275	17.8	11.25	1.44e-38
	chr1	50632027	50632249	ELAVL4	118341	14.1	14.81	1.98e-35
	chr1	51069311	51069533	DMRTA2	180192	72.4	45.69	1.08e-283
	chr1	51076359	51076581	DMRTA2	187240	10.6	33.33	4.36e-38
	chr1	51615878	51616100	C1orf185	47972	8.15	25.69	2.47e-26
	chr1	51816605	51816827	TTC39A	5820	17.6	27.78	3.98e-58
	chr1	51875892	51876114	TTC39A	65107	5.06	15.97	3e-13
	chr1	52058416	52058638	EPS15	73421	8.59	27.08	3.5e-29
	chr1	52143100	52143322	OSBPL9	52165	13.4	42.36	2.68e-52
	chr1	52157988	52158210	OSBPL9	37277	49.1	30.97	9.87e-167
	chr1	52159364	52159586	OSBPL9	35901	71.6	75.22	0
	chr1	52294770	52294992	MIR761	7083	38.5	40.51	3.4e-145
	chr1	52539584	52539806	BTF3L4	17727	9.25	29.16	4.3e-32
	chr1	52834691	52834913	CC2D1B	2814	18.3	11.53	1.26e-39
	chr1	52952887	52953109	ZCCHC11	65654	6.38	20.14	1.59e-19
	chr1	53226271	53226493	ZYG11B	34140	13	10.24	3.01e-26
	chr1	53666988	53667210	CPT2	4887	13.9	14.58	2.9e-34
	chr1	55525774	55525996	PCSK9	20625	11.9	12.5	1.77e-27
	chr1	55590213	55590435	PCSK9	85064	17.8	8.03	3.09e-31
	chr1	56576800	56577022	PPAP2B	468236	19.2	12.08	7.65e-43
	chr1	56905416	56905638	PPAP2B	139620	10.1	15.97	3.77e-26
	chr1	56999422	56999644	PPAP2B	45614	12.1	12.73	1.39e-28
	chr1	57583916	57584138	C8B	152103	6.83	21.53	7.54e-21
	chr1	58096463	58096685	DAB1-AS1	229531	16.1	101.38	1.77e-80
	chr1	58672569	58672791	DAB1	43421	27.1	28.47	6.58e-90
	chr1	59481517	59481739	LINC01358	4410	8.37	26.39	9.47e-28
	chr1	59588790	59589012	HSD52	23468	7.71	12.15	3.98e-18
	chr1	60195939	60196161	MIR4711	2808	11.2	70.83	1.71e-51
	chr1	60825921	60826143	C1orf87	286479	19.8	124.99	4.18e-105
	chr1	62339250	62339472	INADL	131101	9.69	10.18	4.28e-20
	chr1	62368967	62369189	INADL	160818	26.2	27.54	1.45e-85
	chr1	63088621	63088843	ANGPTL3	25463	9.91	10.42	4.13e-21
	chr1	64473579	64473801	ROR1-AS1	104088	13.2	13.89	5.85e-32
	chr1	64876897	64877119	CACHD1	59358	39.6	31.25	5.68e-135
	chr1	65607193	65607415	AK4	5818	5.5	17.36	1.09e-15
	chr1	65611416	65611638	AK4	1595	26	27.31	3.95e-84
	chr1	66866450	66866672	PDE4B	68657	121.5	63.88	0
	chr1	66928032	66928254	SGIP1	71572	24.4	77.08	2.57e-114
	chr1	67400151	67400373	MIER1	9573	10.3	32.64	1.44e-36
	chr1	67612333	67612555	C1orf141	11679	19.6	12.36	6.26e-44
	chr1	67680996	67681218	IL23R	48827	14.8	15.51	8.57e-38
	chr1	67832696	67832918	IL12RB2	59649	26	13.66	4.95e-61
	chr1	67875520	67875742	SERBP1	20382	27.5	28.93	2.29e-91
	chr1	68152353	68152575	GADD45A	1493	122.9	55.35	0
	chr1	68190934	68191156	GADD45A	40074	210.5	82.98	0
	chr1	68204245	68204467	GADD45A	53385	13.9	21.87	2.06e-41
	chr1	69521013	69521235	DEPDC1	558109	284	223.94	0
	chr1	72466574	72466796	NEGR1-IT1	163879	108.5	342.33	0
	chr1	74625801	74626023	LRRIQ3	37849	42.3	66.66	1.01e-187
	chr1	74916168	74916390	TNNI3K	215097	20.7	65.27	4.53e-92
	chr1	75557851	75558073	LHX8	42495	68	214.56	0
	chr1	75837635	75837857	LHX8	237068	121.1	190.96	0
	chr1	76106629	76106851	SLC44A5	29830	6.61	10.42	6.44e-14
	chr1	76157911	76158133	ACADM	31900	7.71	24.3	6.18e-25
	chr1	77385040	77385262	ST6GALNAC5	51854	30.6	19.3	9.04e-86
	chr1	77875127	77875349	AK5	126840	40.1	63.19	4.93e-175
	chr1	78414685	78414907	FUBP1	29871	9.25	14.58	8.8e-24
	chr1	78578949	78579171	GIPC2	67360	50.4	159.01	1.26e-283
	chr1	79554764	79554986	ELTD1	82269	8.15	25.69	2.47e-26
	chr1	82340175	82340397	LPHN2	74093	27.3	28.7	2.29e-91
	chr1	82346371	82346593	LPHN2	80289	16.5	26.04	7.85e-54
	chr1	83477062	83477284	LINC01361	26457	11.9	12.5	1.77e-27
	chr1	84957580	84957802	RPF1	12660	9.25	9.72	4.29e-19
	chr1	85051539	85051761	CTBS	11376	42.5	268.03	1.4e-269
	chr1	85528285	85528507	WDR63	304	16.7	8.8	1.01e-30
	chr1	85697649	85697871	C1orf52	27485	13.2	20.83	9.34e-39
	chr1	86021960	86022182	CYR61	24263	7.93	8.33	2.57e-14
	chr1	86979857	86980079	CLCA4	32681	13	20.48	1.92e-37
	chr1	87640490	87640712	LOC101927844	37641	41.2	64.92	1.88e-180
	chr1	88501387	88501609	PKN2	648314	18.1	113.88	1.18e-92
	chr1	88522843	88523065	PKN2	626858	11.2	17.71	4.76e-31
	chr1	89010789	89011011	PKN2	138912	10.3	10.88	3.86e-22
	chr1	89113063	89113285	PKN2	36638	34.1	53.81	1.82e-141
	chr1	89230444	89230666	PKN2-AS1	79557	17	8.91	1.14e-31
	chr1	89267638	89267860	GTF2B	89442	225	354.83	0
	chr1	89771959	89772181	LOC729930	15914	26.2	27.54	1.45e-85
	chr1	89789575	89789797	LOC729930	33530	16.7	8.8	1.01e-30
	chr1	91521491	91521713	ZNF644	33679	36.1	113.88	1.66e-185
	chr1	91665345	91665567	ZNF644	177533	11.7	12.27	2.19e-26
	chr1	91725160	91725382	HFM1	145045	11.4	36.11	1.02e-42
	chr1	91995529	91995751	CDC7	29125	149.9	59.11	0
	chr1	92070547	92070769	CDC7	104143	40.7	42.82	1.56e-156
	chr1	92402995	92403217	BRDT	11712	9.03	56.94	7.41e-39
	chr1	93310164	93310386	SNORA66	3888	8.59	27.08	3.5e-29
	chr1	93687557	93687779	CCDC18	41284	16.1	8.45	7.46e-29
	chr1	93688949	93689171	CCDC18	42676	111.8	117.58	0
	chr1	93961959	93962181	FNBP1L	48271	9.47	14.93	8.8e-24
	chr1	94058656	94058878	LOC100129046	1131	5.5	34.72	1.3e-20
	chr1	94426458	94426680	GCLM	51446	5.94	18.75	6.06e-17
	chr1	94887472	94887694	ABCD3	3539	12.3	9.72	2.95e-24
	chr1	95302548	95302770	SLC44A3	16650	165.1	130.2	0
	chr1	95633113	95633335	TMEM56-RWDD3	49634	8.15	8.56	3.07e-15
	chr1	95720583	95720805	RWDD3	20872	17.8	18.75	3.87e-50
	chr1	95818037	95818259	RWDD3	118326	4.84	15.28	3e-13
	chr1	96250681	96250903	LOC100996635	275009	27.7	87.49	1.77e-133
	chr1	96573831	96574053	LOC101928241	265629	13	8.19	8.55e-23
	chr1	96799909	96800131	LOC101928241	39551	28.6	30.09	3.02e-97
	chr1	97527252	97527474	DPYD-AS1	34006	27.3	86.1	1.54e-131
	chr1	98636356	98636578	LOC729987	39690	13.9	14.58	2.9e-34
	chr1	98930553	98930775	SNX7	196462	45.4	14.3	1.27e-109
	chr1	98981929	98982151	SNX7	145086	90.9	71.7	0
	chr1	100039333	100039555	PALMD	71877	6.83	21.53	7.54e-21
	chr1	100508198	100508420	HIAT1	4409	6.38	10.07	6.44e-14
	chr1	101301480	101301702	EXTL2	59034	14.1	14.81	1.98e-35
	chr1	101992441	101992663	S1PR1	290136	53.1	83.67	1.7e-251
	chr1	102220872	102221094	OLFM3	91543	10.8	11.34	3.08e-24
	chr1	103489722	103489944	COL11A1	84109	15	23.61	7.68e-47
	chr1	107412842	107413064	PRMT6	186204	12.1	19.1	7.5e-35
	chr1	108265170	108265392	VAV3	34044	6.38	40.27	2.38e-25
	chr1	109112807	109113029	FAM102B	9836	11.9	9.37	2.81e-23
	chr1	109388601	109388823	AKNAD1	10904	17	26.73	2.96e-55
	chr1	109462843	109463065	CLCC1	43057	11.9	12.5	1.77e-27
	chr1	109571111	109571333	WDR47	13518	8.15	8.56	3.07e-15
	chr1	109740686	109740908	KIAA1324	11515	18.9	119.43	7.59e-99
	chr1	109756948	109757170	SARS	433	22.7	23.84	4.59e-70
	chr1	109839555	109839777	MYBPHL	9887	15.2	15.97	5.46e-39
	chr1	110108923	110109145	GNAI3	17737	16.5	8.68	1.01e-30
	chr1	110363251	110363473	EPS8L3	56607	21.6	22.68	5.84e-66
	chr1	110454087	110454309	CSF1	854	15.6	98.6	1.77e-78
	chr1	111447201	111447423	CD53	31479	15.4	12.15	1.27e-34
	chr1	111757157	111757379	DENND2D	9997	226.3	118.97	0
	chr1	111907466	111907688	PIFO	18271	189.1	149.12	0
	chr1	112862314	112862536	CTTNBP2NL	76265	21.6	13.61	9.92e-52
	chr1	112901347	112901569	CTTNBP2NL	37232	18.9	19.91	5.34e-54
	chr1	112928813	112929035	CTTNBP2NL	9766	6.16	19.44	3.18e-18
	chr1	112944802	112945024	CTTNBP2NL	6002	8.59	27.08	3.5e-29
	chr1	113188914	113189136	CAPZA1	26839	39.6	62.49	1.94e-171
	chr1	113230062	113230284	MOV10	13128	41.2	43.28	3.62e-158
	chr1	113246445	113246667	RHOC	3012	17	8.91	1.14e-31
	chr1	113305772	113305994	FAM19A3	42583	103.7	81.76	0
	chr1	113417153	113417375	LINC01356	23888	15	9.44	2.07e-29
	chr1	114459784	114460006	DCLRE1B	11869	9.03	9.49	4.16e-18
	chr1	114879041	114879263	TRIM33	174519	25.3	79.85	4.16e-118
	chr1	114977406	114977628	TRIM33	76154	10.6	8.33	1.76e-19
	chr1	115071959	115072181	TRIM33	18178	14.3	90.27	1.44e-70
	chr1	115153298	115153520	BCAS2	29033	21.4	22.45	1.32e-64
	chr1	115843231	115843453	NGF	37405	18.9	19.91	5.34e-54
	chr1	116381915	116382137	NHLH2	1197	17.2	108.32	1.46e-88
	chr1	116420172	116420394	NHLH2	36839	29.5	93.05	3.21e-145
	chr1	116576051	116576273	SLC22A15	56932	8.15	12.85	3.17e-19
	chr1	117096441	117096663	CD58	17053	16.1	101.38	1.77e-80
	chr1	117421819	117422041	PTGFRN	30649	112.5	88.71	0
	chr1	118087169	118087391	FAM46C	61214	5.72	36.11	3.61e-22
	chr1	119839466	119839688	HAO2	71715	6.38	40.27	2.38e-25
	chr1	119901380	119901602	HAO2	9801	55	57.87	4.78e-233
	chr1	120147794	120148016	LINC00622	5880	16.1	16.9	1.25e-42
	chr1	120460009	120460231	ADAM30	20862	11.2	35.41	3.66e-41
	chr1	121285911	121286133	EMBP1	25001	45.1	28.47	4.65e-149
	chr1	142705741	142705963	ANKRD20A12P	7643	7.27	22.91	3.42e-22
	chr1	142834256	142834478	ANKRD20A12P	120651	11.7	36.8	1.02e-42
	chr1	144010734	144010956	FAM72C	97574	432.6	124.04	0
	chr1	145468988	145469210	POLR3GL	1178	11	17.36	8.35e-30
	chr1	146642202	146642424	PRKAB2	1745	10.1	31.94	4.62e-35
	chr1	147314622	147314844	GJA8	60103	14.8	15.51	8.57e-38
	chr1	149869454	149869676	BOLA1	1480	30.6	48.26	1.1e-122
	chr1	150596830	150597052	ENSA	5047	5.94	18.75	6.06e-17
	chr1	150720367	150720589	CTSS	17845	17.6	27.78	3.98e-58
	chr1	150851740	150851962	ARNT	2496	9.47	14.93	8.8e-24
	chr1	151496687	151496909	CGN	12825	6.16	38.89	9.51e-24
	chr1	151962837	151963059	S100A10	3656	15	9.44	2.07e-29
	chr1	152140327	152140549	RPTN	8623	66.7	15.03	4.09e-164
	chr1	152450133	152450355	LCE5A	32966	38.5	60.76	4.52e-166
	chr1	152758553	152758775	LCE1E	0	32.8	103.46	3.75e-165
	chr1	152783584	152783806	LCE1B	642	10.8	34.02	1.28e-39
	chr1	152877840	152878062	IVL	2978	17.2	108.32	1.46e-88
	chr1	153498686	153498908	S100A6	9810	78.2	35.22	8.67e-279
	chr1	153540046	153540268	S100A2	1740	101.9	80.37	0
	chr1	154363862	154364084	IL6R	13586	17.6	11.11	1.62e-37
	chr1	154786014	154786236	KCNN3	56519	20	31.59	6.5e-70
	chr1	154834830	154835052	KCNN3	7703	13.4	21.18	4.44e-40
	chr1	154905655	154905877	PMVK	3608	6.61	10.42	6.44e-14
	chr1	154976250	154976472	ZBTB7B	1144	14.1	22.22	9.37e-43
	chr1	155411606	155411828	POU5F1P4	8635	23.6	18.57	2.09e-65
	chr1	155516293	155516515	ASH1L-AS1	15258	24.7	77.77	2.57e-114
	chr1	155966637	155966859	ARHGEF2	18301	5.5	34.72	1.3e-20
	chr1	156093590	156093812	LMNA	9129	53.7	56.48	5.11e-226
	chr1	156700963	156701185	RRNAD1	2700	10.8	68.05	1.2e-49
	chr1	157043995	157044217	ETV3L	25384	13.7	10.76	2.58e-29
	chr1	160373932	160374154	VANGL2	3568	9.69	15.28	5.86e-25
	chr1	161044490	161044712	ARHGAP30	4730	17.8	56.24	5.27e-76
	chr1	161074412	161074634	KLHDC9	6231	14.8	9.3	1.95e-28
	chr1	161451614	161451836	FCGR2A	23370	7.27	11.46	5.53e-16
	chr1	161661755	161661977	RPL31P11	6713	11.7	9.2	2.61e-22
	chr1	162515178	162515400	UAP1	15897	15.4	16.2	3.41e-40
	chr1	163252276	163252498	RGS5	39084	12.3	38.89	7.22e-46
	chr1	163793356	163793578	LOC100422212	400375	9.25	9.72	4.29e-19
	chr1	165827660	165827882	UCK2	30928	15.6	16.43	2.08e-41
	chr1	165873027	165873249	MIR3658	3910	12.1	9.55	2.95e-24
	chr1	166172565	166172787	FAM78B	36607	13.4	42.36	2.68e-52
	chr1	166315390	166315612	FAM78B	179432	25.8	81.24	6.42e-122
	chr1	166871144	166871366	TADA1	25490	13.4	21.18	4.44e-40
	chr1	166992392	166992614	MAEL	47573	11.4	18.05	2.64e-32
	chr1	167542332	167542554	CREG1	19276	24.9	19.62	1.56e-70
	chr1	168961058	168961280	LINC00970	94964	45.6	47.91	2.23e-181
	chr1	169172239	169172461	ATP1B1	96292	11	11.57	3.08e-24
	chr1	169553793	169554015	F5	1755	18.7	11.8	9.19e-42
	chr1	170594615	170594837	PRRX1	38477	12.8	13.42	8e-31
	chr1	170618876	170619098	PRRX1	14216	5.72	18.05	6.06e-17
	chr1	171723615	171723837	VAMP4	12236	11.9	18.75	1.43e-33
	chr1	171853769	171853991	DNM3	43151	15.6	8.22	6.24e-28
	chr1	171871771	171871993	DNM3	61153	46.7	16.36	1.43e-120
	chr1	172040772	172040994	MIR3120	66955	13	10.24	3.01e-26
	chr1	172176182	172176404	DNM3OS	62207	9.47	9.95	4.29e-19
	chr1	172345773	172345995	C1orf105	43834	14.1	8.89	1.62e-26
	chr1	172392570	172392792	C1orf105	2742	70.2	31.64	1.09e-240
	chr1	172445448	172445670	PIGC	32218	52.2	164.57	1.13e-294
	chr1	173265005	173265227	TNFSF4	88534	20	15.8	8.38e-52
	chr1	173611666	173611888	LOC730159	7005	12.5	19.79	3.84e-36
	chr1	173830098	173830320	GAS5-AS1	2067	13	20.48	1.92e-37
	chr1	174567227	174567449	GPR52	150015	23.3	147.21	1.44e-128
	chr1	175500045	175500267	TNR	212486	17.8	28.12	1.42e-59
	chr1	175705910	175706132	TNR	6621	13	40.97	4.62e-49
	chr1	175763814	175764036	TNR	51062	8.81	55.55	4.15e-37
	chr1	175782996	175783218	TNR	70244	39.4	124.29	2.46e-208
	chr1	175787414	175787636	TNR	74662	8.59	13.54	1.8e-21
	chr1	177782483	177782705	LOC101928778	112824	11.2	17.71	4.76e-31
	chr1	177884007	177884229	SEC16B	54822	15.4	8.1	5.11e-27
	chr1	177915116	177915338	SEC16B	23713	8.37	8.8	3.53e-16
	chr1	178247290	178247512	RASAL2-AS1	184162	21.6	17.01	6.83e-58
	chr1	179008265	179008487	FAM20B	13191	10.8	8.51	2.07e-20
	chr1	179606646	179606868	TDRD5	45657	15.4	12.15	1.27e-34
	chr1	180179174	180179396	FLJ23867	12030	11.2	70.83	1.71e-51
	chr1	180226137	180226359	LHX4-AS1	17458	4.4	27.78	1.19e-14
	chr1	180485245	180485467	ACBD6	13223	124.4	98.08	0
	chr1	180491204	180491426	ACBD6	19182	21.1	13.33	1.81e-49
	chr1	180554705	180554927	XPR1	46220	6.83	21.53	7.54e-21
	chr1	181068784	181069006	IER5	11146	48.4	50.92	1.29e-196
	chr1	181104175	181104397	IER5	46537	378.5	132.63	0
	chr1	181394011	181394233	CACNA1E	58454	9.69	10.18	4.28e-20
	chr1	181491037	181491259	CACNA1E	38351	140.7	221.86	0
	chr1	181737377	181737599	CACNA1E	284691	20	21.06	3.02e-59
	chr1	182612937	182613159	LOC284648	28662	46.7	36.8	3.47e-170
	chr1	182730584	182730806	NPL	27779	226.6	178.63	0
	chr1	182838555	182838777	DHX9	30116	8.81	13.89	1.8e-21
	chr1	182931843	182932065	SHCBP1L	9290	18.3	8.23	3.79e-32
	chr1	183182132	183182354	LAMC2	26958	9.47	29.86	4.3e-32
	chr1	183283425	183283647	NMNAT2	9416	9.25	9.72	4.29e-19
	chr1	183433053	183433275	SMG7-AS1	7843	28.8	18.19	3.88e-78
	chr1	184961488	184961710	FAM129A	17770	15.4	24.3	3.2e-48
	chr1	185606254	185606476	LINC01350	8634	50.6	159.71	1.26e-283
	chr1	186708775	186708997	PTGS2	59216	43.2	27.22	2.19e-140
	chr1	186897066	186897288	PLA2G4A	99034	17	17.82	2.39e-46
	chr1	187231955	187232177	PLA2G4A	433923	11.2	8.85	2.35e-21
	chr1	187377399	187377621	PLA2G4A	579367	77.5	61.11	0
	chr1	187599839	187600061	PLA2G4A	801807	117.8	74.3	0
	chr1	187607925	187608147	PLA2G4A	809893	277.2	874.23	0
	chr1	188086645	188086867	PLA2G4A	1288613	7.93	25	6.18e-25
	chr1	189763882	189764104	BRINP3	682656	16.3	17.13	7.34e-44
	chr1	190841610	190841832	LOC440704	247590	4.84	15.28	3e-13
	chr1	191870855	191871077	RGS18	256516	33.2	104.85	3.61e-167
	chr1	192870732	192870954	RGS2	92563	41.2	21.64	1.26e-120
	chr1	194852372	194852594	B3GALT2	1696629	30.8	194.43	3.98e-182
	chr1	194996028	194996250	MIR4735	1555362	31.7	25	8.21e-99
	chr1	196466235	196466457	MIR4735	85155	17.6	11.11	1.62e-37
	chr1	198173120	198173342	NEK7	47012	16.5	13.02	4.98e-39
	chr1	198315463	198315685	NEK7	189355	8.81	13.89	1.8e-21
	chr1	199918185	199918407	NR5A2	78324	169.5	133.67	0
	chr1	200264376	200264598	LINC00862	78323	15.6	9.86	2.19e-31
	chr1	200289119	200289341	LINC00862	53580	29.1	22.91	8.68e-88
	chr1	200811860	200812082	GPR25	30002	45.8	72.22	5.51e-208
	chr1	201438184	201438406	PHLDA3	0	111.2	58.44	0
	chr1	201492354	201492576	RPS10P7	3322	20.9	21.99	6.51e-62
	chr1	202025791	202026013	ELF3	46101	85.9	67.7	0
	chr1	202206330	202206552	LGR6	23047	64.5	40.69	8.27e-243
	chr1	202323457	202323679	UBE2T	12363	48.2	50.69	1.29e-196
	chr1	202944947	202945169	CYB5R1	8543	19.2	15.1	3.13e-48
	chr1	202971695	202971917	LOC100506747	4477	140.9	88.88	0
	chr1	203220680	203220902	CHIT1	21820	27.5	10.85	7.06e-57
	chr1	203222030	203222252	CHIT1	23170	12.5	19.79	3.84e-36
	chr1	203272657	203272879	LINC01136	1575	7.93	12.5	3.98e-18
	chr1	203275670	203275892	BTG2	1006	19.8	20.83	6.34e-58
	chr1	204478587	204478809	MDM4	6699	127.5	50.26	0
	chr1	204494068	204494290	MDM4	8561	88.5	46.52	0
	chr1	205091268	205091490	RBBP5	118	9.03	14.23	1.28e-22
	chr1	205718854	205719076	NUCKS1	297	10.6	16.67	1.42e-28
	chr1	206264885	206265107	C1orf186	23541	9.03	28.47	1.25e-30
	chr1	206298237	206298459	C1orf186	9590	12.8	13.42	8e-31
	chr1	206656031	206656253	MIR6769B	7885	5.5	17.36	1.09e-15
	chr1	206820503	206820725	DYRK3	11622	20.5	10.76	1.36e-42
	chr1	206999954	207000176	IL19	27739	29.9	31.48	3.34e-103
	chr1	207047186	207047408	IL20	8032	24.7	77.77	2.57e-114
	chr1	207135120	207135342	FCAMR	8629	39.2	30.9	1.76e-133
	chr1	207414128	207414350	CD55	80468	18.1	9.49	1.47e-34
	chr1	207880734	207880956	CD46	44428	133.6	105.37	0
	chr1	208387142	208387364	PLXNA2	30302	48.7	306.92	2.65e-316
	chr1	209291181	209291403	MIR205HG	310766	7.27	11.46	5.53e-16
	chr1	209585056	209585278	MIR205HG	16891	47.8	16.74	3.14e-124
	chr1	209604430	209604652	MIR205	827	8.59	9.03	3.9e-17
	chr1	210494932	210495154	HHAT	6443	61.9	48.78	1.82e-248
	chr1	210585051	210585273	HHAT	83455	38.5	60.76	4.52e-166
	chr1	211668945	211669167	RD3	2686	53.7	338.86	0
	chr1	211750614	211750836	SLC30A1	1264	39.2	41.2	2.04e-148
	chr1	212676204	212676426	NENF	69975	60.3	47.57	4.76e-240
	chr1	212769791	212770013	ATF3	11958	286.9	301.59	0
	chr1	214612868	214613090	PTPN14	111935	338	355.29	0
	chr1	215175062	215175284	KCNK2	81277	13.2	10.42	2.93e-27
	chr1	216100955	216101177	KCTD3	360220	6.83	10.76	6.11e-15
	chr1	217065173	217065395	ESRRG	47621	5.72	18.05	6.06e-17
	chr1	218774447	218774669	LOC728463	255427	145.1	91.52	0
	chr1	218807571	218807793	LOC728463	288551	10.1	10.65	4.13e-21
	chr1	219759233	219759455	RNU5F-1	287165	33.9	53.47	9.76e-140
	chr1	220509775	220509997	RAB3GAP2	63932	23.6	10.61	1.05e-48
	chr1	221345981	221346203	C1orf140	163436	18.1	113.88	1.18e-92
	chr1	221970558	221970780	DUSP10	55040	16.5	17.36	4.23e-45
	chr1	222157954	222158176	DUSP10	242436	14.1	8.89	1.62e-26
	chr1	222545233	222545455	HHIPL2	175990	9.25	14.58	8.8e-24
	chr1	222979277	222979499	DISP1	8933	62.7	98.95	2.74e-310
	chr1	223221495	223221717	TLR5	94908	19.2	15.1	3.13e-48
	chr1	223895861	223896083	CAPN2	4037	87.8	39.58	0
	chr1	223926920	223927142	CAPN2	26801	7.93	25	6.18e-25
	chr1	225375327	225375549	LBR	241009	26	27.31	3.95e-84
	chr1	225582633	225582855	LBR	33703	10.6	11.11	3.49e-23
	chr1	225813235	225813457	ENAH	27389	10.3	10.88	3.86e-22
	chr1	226014115	226014337	EPHX1	16339	8.15	8.56	3.07e-15
	chr1	226402285	226402507	MIXL1	8813	9.03	9.49	4.16e-18
	chr1	226502682	226502904	LIN9	5233	11.7	9.2	2.61e-22
	chr1	227521334	227521556	CDC42BPA	15508	16.7	13.19	4.98e-39
	chr1	227572717	227572939	CDC42BPA	66891	13	10.24	3.01e-26
	chr1	227580640	227580862	CDC42BPA	74814	10.1	15.97	3.77e-26
	chr1	227911267	227911489	LOC100130093	4752	59.9	26.98	2.66e-192
	chr1	227938130	227938352	JMJD4	15018	7.49	23.61	1.48e-23
	chr1	228103522	228103744	MIR5008	25641	18.7	14.76	4.7e-47
	chr1	229367149	229367371	RAB4A	39439	16.3	17.13	7.34e-44
	chr1	229598316	229598538	ACTA1	28473	15.9	50	6.17e-64
	chr1	229820333	229820555	URB2	58352	17.4	13.71	2.78e-41
	chr1	230763619	230763841	COG2	14362	59.4	62.49	5.88e-258
	chr1	232266641	232266863	DISC2	312378	12.8	40.27	4.62e-49
	chr1	232884688	232884910	LOC101927683	6227	47.6	37.5	2.52e-173
	chr1	233088706	233088928	NTPCR	2336	47.8	25.11	2.39e-149
	chr1	233315435	233315657	PCNXL2	115803	178.1	187.25	0
	chr1	233844208	233844430	MIR4427	84310	56.1	35.41	1.03e-201
	chr1	234528938	234529160	COA6	19724	86.5	272.89	0
	chr1	234548604	234548826	COA6	39390	12.1	12.73	1.39e-28
	chr1	234703006	234703228	LINC01354	35481	8.15	8.56	3.07e-15
	chr1	234754220	234754442	IRF2BP2	8949	336.4	265.25	0
	chr1	234835930	234836152	LINC01132	23638	20.3	21.29	3.02e-59
	chr1	234872212	234872434	LINC01132	12423	14.1	14.81	1.98e-35
	chr1	235511576	235511798	TBCE	18878	62.5	49.3	7.54e-252
	chr1	235833295	235833517	GNG4	19241	61.2	96.52	2.51e-302
	chr1	235838432	235838654	GNG4	24378	110.3	69.58	0
	chr1	236096447	236096669	LYST	49439	14.5	22.91	4.16e-44
	chr1	241100231	241100453	MIR3123	195120	19.6	15.45	2.05e-49
	chr1	241852141	241852363	WDR64	36561	16.1	101.38	1.77e-80
	chr1	242087254	242087476	BECN1P1	33594	7.71	48.61	5.83e-32
	chr1	242363491	242363713	MAP1LC3C	201106	24.4	15.42	3.28e-62
	chr1	242464278	242464500	PLD5	148285	13.7	86.1	1.14e-66
	chr1	243617703	243617925	MIR4677	108225	19.8	15.62	1.32e-50
	chr1	244402791	244403013	C1orf100	112925	105.2	110.64	0
	chr1	244898802	244899024	DESI2	82450	686.5	721.7	0
	chr1	245305687	245305909	KIF26B	12379	13.4	42.36	2.68e-52
	chr1	245653142	245653364	KIF26B	334855	9.03	9.49	4.16e-18
	chr1	245803076	245803298	KIF26B	484789	20.9	16.49	3.22e-54
	chr1	246112418	246112640	SMYD3	558005	6.61	20.83	1.59e-19
	chr1	246164516	246164738	SMYD3	505907	47.6	74.99	2.57e-217
	chr1	247112637	247112859	AHCTF1	17911	32.4	25.52	5.1e-103
	chr1	247276558	247276780	C1orf229	839	11	11.57	3.08e-24
	chr1	247662746	247662968	OR2W5	8376	16.7	52.77	4.65e-69
	chr1	247759108	247759330	OR2G2	7446	27.1	85.41	1.32e-129
	chr1	249129856	249130078	ZNF672	2453	4.84	15.28	3e-13
	chr10	120318	120540	TUBB8	25140	8.15	25.69	2.47e-26
	chr10	419460	419682	ZMYND11	239055	10.8	11.34	3.08e-24
	chr10	524403	524625	MIR5699	163094	7.49	23.61	1.48e-23
	chr10	566458	566680	MIR5699	121039	16.1	25.34	5.21e-51
	chr10	4953326	4953548	AKR1C6P	4918	31	97.91	3.86e-153
	chr10	4958320	4958542	AKR1C6P	0	9.47	29.86	4.3e-32
	chr10	4960503	4960725	AKR1C6P	2038	18.3	19.21	2.03e-51
	chr10	5580912	5581134	CALML3-AS1	12703	7.27	11.46	5.53e-16
	chr10	5835858	5836080	GDI2	19433	29.1	45.83	2.53e-114
	chr10	7033512	7033734	LINC00707	211952	33	104.16	3.61e-167
	chr10	7515507	7515729	SFMBT2	64204	9.69	10.18	4.28e-20
	chr10	11113752	11113974	CELF2-AS2	33478	16.5	17.36	4.23e-45
	chr10	11727789	11728011	ECHDC3	56346	7.27	22.91	3.42e-22
	chr10	11880364	11880586	PROSER2	14967	15.2	47.91	1.45e-60
	chr10	12235924	12236146	CDC123	1816	17	17.82	2.39e-46
	chr10	12276797	12277019	NUDT5	38654	6.38	20.14	1.59e-19
	chr10	12363705	12363927	CAMK1D	27657	9.47	14.93	8.8e-24
	chr10	12673223	12673445	MIR4480	52471	18.1	18.98	3.87e-50
	chr10	13118605	13118827	OPTN	23256	7.71	24.3	6.18e-25
	chr10	13170565	13170787	OPTN	28483	20.7	65.27	4.53e-92
	chr10	13571700	13571922	BEND7	26724	12.3	9.72	2.95e-24
	chr10	13714954	13715176	PRPF18	86015	14.5	11.46	2.08e-31
	chr10	13800419	13800641	PRPF18	171480	46.5	48.84	1.98e-186
	chr10	13913048	13913270	PRPF18	284109	29.9	47.22	2.52e-119
	chr10	14604907	14605129	FAM107B	41289	13.2	13.89	5.85e-32
	chr10	14691021	14691243	FAM107B	44604	6.61	10.42	6.44e-14
	chr10	15047426	15047648	OLAH	38248	13	40.97	4.62e-49
	chr10	15072424	15072646	OLAH	13250	5.5	17.36	1.09e-15
	chr10	15165970	15166192	C10orf111	26652	25.8	13.54	4.95e-61
	chr10	15214535	15214757	NMT2	3840	19.6	10.3	1.59e-39
	chr10	15942693	15942915	FAM188A	40174	8.15	12.85	3.17e-19
	chr10	16076691	16076913	FAM188A	174172	8.59	54.16	4.15e-37
	chr10	16238941	16239163	PTER	239780	66.9	52.77	9.05e-276
	chr10	17289379	17289601	VIM-AS1	17395	77.9	49.16	3.53e-312
	chr10	17552599	17552821	ST8SIA6	56345	11.9	12.5	1.77e-27
	chr10	18408759	18408981	CACNB2	20626	10.1	10.65	4.13e-21
	chr10	21716759	21716981	MIR1915	68590	131	413.16	0
	chr10	21747412	21747634	MIR1915	37937	6.61	20.83	1.59e-19
	chr10	22025946	22026168	MLLT10	202845	7.49	11.8	4.79e-17
	chr10	22038433	22038655	MLLT10	215332	17.6	18.52	7.23e-49
	chr10	24545013	24545235	MIR603	19380	42.1	265.25	9.96e-265
	chr10	24577833	24578055	MIR603	13219	115.1	90.79	0
	chr10	24598831	24599053	MIR603	34217	9.47	9.95	4.29e-19
	chr10	24813021	24813243	KIAA1217	57587	8.59	13.54	1.8e-21
	chr10	25045276	25045498	ARHGAP21	32679	49.5	52.08	1.83e-203
	chr10	26540958	26541180	GAD2	35722	8.15	25.69	2.47e-26
	chr10	26712701	26712923	APBB1IP	14344	37.4	23.61	4.52e-115
	chr10	27532047	27532269	ACBD5	979	16.7	26.39	7.85e-54
	chr10	28154219	28154441	MKX	119441	18.9	14.93	4.7e-47
	chr10	28616502	28616724	MIR8086	38223	34.8	12.19	9.58e-77
	chr10	28901067	28901289	BAMBI	65136	18.5	29.16	1.72e-62
	chr10	29258831	29259053	C10orf126	123494	15.2	23.96	7.68e-47
	chr10	29381199	29381421	LYZL1	196570	27.5	21.7	4.74e-81
	chr10	29733167	29733389	LOC102724316	34704	14.8	9.3	1.95e-28
	chr10	29865515	29865737	MIR938	25539	69.1	72.68	1.10e-314
	chr10	30215637	30215859	KIAA1462	132630	19.4	8.73	7.2e-36
	chr10	30519187	30519409	MTPAP	118859	38.5	121.52	4.58e-202
	chr10	30679272	30679494	MIR7162	21678	7.93	25	6.18e-25
	chr10	31372713	31372935	ZNF438	51847	17.2	9.03	1.26e-32
	chr10	31583527	31583749	ZEB1-AS1	24276	33.5	105.55	3.43e-169
	chr10	32177158	32177380	ARHGAP12	40425	28.6	30.09	3.02e-97
	chr10	32359619	32359841	KIF5B	14248	16.3	12.85	6.49e-38
	chr10	33229890	33230112	ITGB1	17182	4.62	29.16	4.25e-16
	chr10	33316089	33316311	ITGB1	68796	6.83	10.76	6.11e-15
	chr10	33392991	33393213	ITGB1	145698	5.94	18.75	6.06e-17
	chr10	33993466	33993688	LINC00838	67921	70.2	73.84	2.78e-320
	chr10	35535318	35535540	CCNY	90263	9.25	29.16	4.3e-32
	chr10	36110230	36110452	PCAT5	43000	12.3	38.89	7.22e-46
	chr10	38297019	38297241	ZNF33A	2338	25.1	19.79	7.87e-72
	chr10	38586497	38586719	HSD17B7P2	58590	23.3	36.8	2.94e-85
	chr10	42919000	42919222	CCNYL2	48467	10.1	63.88	3.43e-44
	chr10	43136387	43136609	ZNF33B	2395	87.6	276.36	0
	chr10	44408245	44408467	LINC00841	3493	20.5	32.29	2.03e-71
	chr10	45933888	45934110	ALOX5	64264	662.3	696.23	0
	chr10	46030762	46030984	MARCH8	0	14.1	22.22	9.37e-43
	chr10	48342832	48343054	ZNF488	12036	46	48.38	9.62e-185
	chr10	49459683	49459905	FRMPD2	23037	41.4	32.64	5.41e-144
	chr10	49625471	49625693	MAPK8	15816	24.9	39.23	3.71e-93
	chr10	49684501	49684723	MAPK8	74846	21.8	34.37	1.66e-77
	chr10	49797548	49797770	ARHGAP22	15407	12.8	10.07	3.01e-26
	chr10	49935302	49935524	WDFY4	41784	11	17.36	8.35e-30
	chr10	50156789	50157011	LRRC18	34509	14.8	15.51	8.57e-38
	chr10	50784101	50784323	CHAT	32819	13.9	43.75	6.23e-54
	chr10	50799038	50799260	CHAT	17882	11.7	12.27	2.19e-26
	chr10	52081934	52082156	ASAH2	73564	26.9	42.36	8.09e-103
	chr10	53355148	53355370	CSTF2T	103986	7.71	24.3	6.18e-25
	chr10	53699294	53699516	CSTF2T	239939	15.4	24.3	3.2e-48
	chr10	54040833	54041055	PRKG1-AS1	32834	7.71	8.1	2.57e-14
	chr10	54203290	54203512	DKK1	129249	28.4	29.86	9.08e-96
	chr10	54501739	54501961	MBL2	29500	25.5	40.27	2.34e-96
	chr10	55379530	55379752	MBL2	848070	15.9	25	1.3e-49
	chr10	59383878	59384100	MIR3924	319559	10.1	31.94	4.62e-35
	chr10	60092981	60093203	UBE2D1	1537	8.59	13.54	1.8e-21
	chr10	61062928	61063150	FAM13C	59203	12.5	39.58	1.85e-47
	chr10	61097048	61097270	FAM13C	25083	42.7	44.9	2.2e-166
	chr10	61725255	61725477	C10orf40	4584	13	40.97	4.62e-49
	chr10	62188513	62188735	ANK3	304550	23.8	37.5	7.94e-87
	chr10	62247962	62248184	ANK3	245101	37.2	39.12	8.56e-139
	chr10	62254677	62254899	ANK3	238386	24.9	9.81	9.1e-49
	chr10	62520534	62520756	CDK1	17334	231.4	364.9	0
	chr10	63412237	63412459	C10orf107	10261	8.59	9.03	3.9e-17
	chr10	63648290	63648512	MIR548AV	87550	12.5	13.19	1.07e-29
	chr10	64096244	64096466	ZNF365	37451	42.5	22.34	2.44e-127
	chr10	67179097	67179319	ANXA2P3	593812	22	11.57	7.8e-48
	chr10	67375124	67375346	ANXA2P3	789839	71.8	37.73	6.51e-263
	chr10	69040320	69040542	LRRTM3	268296	12.8	80.55	6.76e-61
	chr10	69934640	69934862	ATOH7	57009	8.59	54.16	4.15e-37
	chr10	71174007	71174229	TACR2	2446	12.1	19.1	7.5e-35
	chr10	72221590	72221812	PALD1	16753	8.37	26.39	9.47e-28
	chr10	73060775	73060997	SLC29A3	18014	6.83	43.05	5.66e-27
	chr10	73272639	73272861	CDH23	115948	17	26.73	2.96e-55
	chr10	73480814	73481036	C10orf105	16546	10.8	8.51	2.07e-20
	chr10	73648841	73649063	PSAP	37759	7.05	22.22	3.42e-22
	chr10	73690542	73690764	CHST3	33357	24.4	19.27	3.04e-69
	chr10	73939787	73940009	ANAPC16	35750	37.6	39.58	2.18e-140
	chr10	74030427	74030649	DDIT4	3029	18.1	18.98	3.87e-50
	chr10	74058012	74058234	DDIT4	24335	47.3	49.76	1.64e-191
	chr10	74091727	74091949	DNAJB12	22959	6.83	21.53	7.54e-21
	chr10	74464323	74464545	MCU	12434	7.93	25	6.18e-25
	chr10	74649149	74649371	OIT3	3969	9.03	14.23	1.28e-22
	chr10	75635845	75636067	CAMK2G	1496	6.16	38.89	9.51e-24
	chr10	75647552	75647774	CAMK2G	13203	39.9	20.95	2.57e-115
	chr10	76343252	76343474	KAT6B	242698	7.05	11.11	5.53e-16
	chr10	76839612	76839834	DUPD1	21340	11.4	72.22	2.37e-53
	chr10	76901883	76902105	SAMD8	30490	49.5	156.24	4.96e-277
	chr10	77840510	77840732	C10orf11	297991	14.3	11.28	2.08e-31
	chr10	79419147	79419369	KCNMA1	21570	92	580.5	0
	chr10	79568573	79568795	DLG5	117554	9.47	29.86	4.3e-32
	chr10	79658368	79658590	DLG5	27759	29.7	31.25	1.05e-101
	chr10	80679887	80680109	ZMIZ1-AS1	147097	31.5	99.3	3.98e-157
	chr10	80707677	80707899	ZMIZ1-AS1	119307	5.94	37.5	3.61e-22
	chr10	80812563	80812785	ZMIZ1-AS1	14421	7.71	24.3	6.18e-25
	chr10	80859780	80860002	ZMIZ1	30988	41.4	261.09	6.89e-260
	chr10	81020616	81020838	PPIF	86383	9.25	14.58	8.8e-24
	chr10	81780070	81780292	TMEM254	58111	14.1	22.22	9.37e-43
	chr10	82230868	82231090	TSPAN14	16830	47.8	301.36	0
	chr10	82248380	82248602	TSPAN14	34342	12.5	39.58	1.85e-47
	chr10	82378883	82379105	SH2D4B	81225	27.3	28.7	2.29e-91
	chr10	82507303	82507525	SH2D4B	209645	41	129.16	7.45e-219
	chr10	82565142	82565364	SH2D4B	267484	49.5	78.12	1.68e-230
	chr10	82937767	82937989	SH2D4B	640109	29.9	47.22	2.52e-119
	chr10	83204037	83204259	NRG3	433185	9.91	31.25	4.62e-35
	chr10	84452359	84452581	NRG3	814916	10.8	11.34	3.08e-24
	chr10	84833901	84834123	GHITM	1065063	8.37	52.77	2.24e-35
	chr10	85743475	85743697	GHITM	155489	147.5	116.31	0
	chr10	86284905	86285127	CCSER2	196560	85.2	268.73	0
	chr10	87307953	87308175	GRID1-AS1	29314	39.4	31.07	5.68e-135
	chr10	87602092	87602314	GRID1-AS1	264604	6.38	10.07	6.44e-14
	chr10	87980235	87980457	MIR346	44089	29.1	30.55	9.97e-99
	chr10	88718684	88718906	SNCG	396	8.81	55.55	4.15e-37
	chr10	88873503	88873725	FAM35A	18550	24.7	38.89	1.45e-91
	chr10	88932826	88933048	NUTM2A	52158	4.84	30.55	1.42e-17
	chr10	89602920	89603142	KLLN	20053	150.8	79.28	0
	chr10	90020544	90020766	RNLS	322317	38.7	40.74	8.36e-147
	chr10	90176050	90176272	RNLS	166811	22.5	141.65	4.29e-122
	chr10	90280102	90280324	RNLS	62759	10.1	10.65	4.13e-21
	chr10	90750960	90751182	ACTA2	0	63	49.65	1.52e-253
	chr10	91001565	91001787	LIPA	10010	20.7	16.32	3.22e-54
	chr10	91404912	91405134	PANK1	196	33	34.72	2.08e-118
	chr10	91811309	91811531	LOC101926924	94179	29.3	18.47	1.16e-80
	chr10	92000092	92000314	LOC101926924	282962	9.25	9.72	4.29e-19
	chr10	92737205	92737427	ANKRD1	56173	62.3	196.51	0
	chr10	92749548	92749770	LINC00502	55796	9.25	9.72	4.29e-19
	chr10	92998056	92998278	PCGF5	17697	22.9	36.11	1.07e-83
	chr10	93026629	93026851	PCGF5	46270	21.1	16.67	1.95e-55
	chr10	93390459	93390681	PPP1R3C	2178	14.3	15.04	1.32e-36
	chr10	94089891	94090113	MARCH5	38971	26.2	20.66	9.47e-76
	chr10	94147141	94147363	MARK2P9	31056	4.4	27.78	1.19e-14
	chr10	94897956	94898178	CYP26A1	64724	18.3	57.63	9.24e-78
	chr10	95270887	95271109	CEP55	14518	9.91	62.49	3.43e-44
	chr10	96127617	96127839	NOC3L	4934	17.8	28.12	1.42e-59
	chr10	96346073	96346295	HELLS	40549	48.7	51.15	2.53e-198
	chr10	96494471	96494693	CYP2C19	27771	20.5	32.29	2.03e-71
	chr10	96611889	96612111	CYP2C9	86305	5.5	17.36	1.09e-15
	chr10	96747981	96748203	CYP2C9	49566	17.4	13.71	2.78e-41
	chr10	97054870	97055092	PDLIM1	3965	12.3	12.96	1.39e-28
	chr10	97099015	97099237	PDLIM1	48110	126.4	79.72	0
	chr10	97729967	97730189	CC2D2B	29660	5.94	37.5	3.61e-22
	chr10	98616273	98616495	LCOR	24256	13.7	43.05	6.23e-54
	chr10	98785429	98785651	C10orf12	44388	4.4	27.78	1.19e-14
	chr10	98896426	98896648	LOC100505540	33913	19.4	20.37	1.31e-56
	chr10	99309818	99310040	ANKRD2	22159	43.2	22.68	4.77e-130
	chr10	99411563	99411785	PI4K2A	11120	85.9	135.4	0
	chr10	99461505	99461727	MARVELD1	11739	26.6	16.8	1.12e-70
	chr10	100025204	100025426	LOXL4	2582	36.5	57.63	1.96e-155
	chr10	100342123	100342345	HPS1	135419	16.7	13.19	4.98e-39
	chr10	100768926	100769148	HPSE2	226485	80.8	50.97	0
	chr10	101803191	101803413	DNMBP	33515	71.1	22.43	8.49e-212
	chr10	102045791	102046013	BLOC1S2	457	43.2	45.37	1.08e-169
	chr10	102416258	102416480	PAX2	88989	19.2	8.63	6.29e-35
	chr10	102598410	102598632	FAM178A	73695	23.3	12.27	3.85e-52
	chr10	102769404	102769626	LZTS2	12540	25.1	15.83	1.33e-64
	chr10	102981397	102981619	LBX1	7099	81.7	64.4	0
	chr10	103650046	103650268	KCNIP2	46369	129.7	37.18	0
	chr10	104459922	104460144	ARL3	14047	27.3	21.53	4.74e-81
	chr10	104480124	104480346	SFXN2	5826	70.7	44.58	9.13e-274
	chr10	104615822	104616044	C10orf32	1855	13.4	8.47	1.23e-24
	chr10	104615822	104616044	C10orf32-ASMT	1855	13.4	8.47	1.23e-24
	chr10	104802098	104802320	CNNM2	124023	31.5	19.86	1.2e-89
	chr10	105660094	105660316	OBFC1	17730	17	10.69	1.93e-35
	chr10	105845546	105845768	COL17A1	0	9.69	15.28	5.86e-25
	chr10	106211532	106211754	CCDC147	98010	13.7	14.35	2.9e-34
	chr10	106569081	106569303	SORCS3-AS1	143107	217.5	57.17	0
	chr10	106970410	106970632	SORCS3-AS1	544436	6.38	10.07	6.44e-14
	chr10	109345392	109345614	SORCS1	420926	8.37	26.39	9.47e-28
	chr10	109799678	109799900	SORCS1	875212	90.9	573.56	0
	chr10	112816871	112817093	ADRA2A	19698	60.1	21.06	5.72e-174
	chr10	112978101	112978323	ADRA2A	141311	17.4	54.86	1.62e-72
	chr10	114475946	114476168	MIR4295	82017	123.1	55.45	0
	chr10	114484321	114484543	MIR4295	90392	41.8	13.19	5.8e-96
	chr10	114827396	114827618	TCF7L2	117387	87	91.43	0
	chr10	115100961	115101183	HABP2	211596	15	23.61	7.68e-47
	chr10	115129155	115129377	HABP2	183402	16.7	17.59	4.23e-45
	chr10	115748895	115749117	ADRB1	54690	13.4	8.47	1.23e-24
	chr10	116438535	116438757	FAM160B1	142747	14.8	9.3	1.95e-28
	chr10	117879031	117879253	GFRA1	152567	6.83	21.53	7.54e-21
	chr10	118005550	118005772	GFRA1	26048	8.59	27.08	3.5e-29
	chr10	118394061	118394283	PNLIPRP2	13596	155	244.42	0
	chr10	118507611	118507833	HSPA12A	5526	18.1	18.98	3.87e-50
	chr10	118537281	118537503	HSPA12A	35196	43.8	276.36	2.52e-279
	chr10	118976404	118976626	KCNK18	19404	49.8	39.23	2.1e-184
	chr10	119316509	119316731	EMX2OS	11930	8.81	9.26	3.9e-17
	chr10	119988207	119988429	FAM204A	113411	20	31.59	6.5e-70
	chr10	120010043	120010265	FAM204A	91575	17.8	56.24	5.27e-76
	chr10	120387439	120387661	PRLHR	32279	11.9	37.5	2.75e-44
	chr10	120756265	120756487	NANOS1	32742	17.4	10.97	1.78e-36
	chr10	120763264	120763486	NANOS1	25743	98	51.5	0
	chr10	121084666	121084888	MIR4681	52597	34.6	21.8	7.53e-103
	chr10	122155759	122155981	PPAPDC1A	60486	18.3	19.21	2.03e-51
	chr10	122263901	122264123	PPAPDC1A	47435	57.5	60.41	3.18e-247
	chr10	122773690	122773912	WDR11-AS1	162999	25.1	19.79	7.87e-72
	chr10	122919377	122919599	WDR11-AS1	308686	42.9	22.57	1.08e-128
	chr10	123370555	123370777	FGFR2	12583	59.2	93.39	1.75e-288
	chr10	123438928	123439150	FGFR2	80956	8.15	51.38	1.17e-33
	chr10	123714989	123715211	NSMCE4A	19533	23.1	14.58	2.5e-56
	chr10	123830020	123830242	TACC2	92700	16.3	25.69	2.04e-52
	chr10	124717038	124717260	C10orf88	3119	25.1	11.31	6.47e-54
	chr10	124863531	124863753	HMX3	31815	22.9	14.44	2.5e-56
	chr10	125204994	125205216	GPR26	220656	63	198.59	0
	chr10	125298453	125298675	GPR26	127197	109.2	86.1	0
	chr10	125578944	125579166	CPXM2	72335	5.5	17.36	1.09e-15
	chr10	126729695	126729917	MIR4296	8256	50	22.52	3.9e-149
	chr10	126776202	126776424	MIR4296	54763	95.8	50.34	0
	chr10	126985232	126985454	CTBP2	135608	10.3	16.32	2.35e-27
	chr10	127141705	127141927	TEX36-AS1	121014	21.4	11.23	1.02e-45
	chr10	127656220	127656442	FANK1-AS1	5401	167.1	52.7	0
	chr10	128157004	128157226	LINC00601	46556	8.37	26.39	9.47e-28
	chr10	128831930	128832152	FAM196A	162271	20.5	32.29	2.03e-71
	chr10	129017598	129017820	FAM196A	23176	16.5	26.04	7.85e-54
	chr10	129373099	129373321	NPS	25486	31.5	16.55	3.08e-82
	chr10	129661521	129661743	CLRN3	29469	797	502.73	0
	chr10	129738074	129738296	CLRN3	46863	780.7	820.76	0
	chr10	129885445	129885667	MKI67	38802	7.93	25	6.18e-25
	chr10	130318755	130318977	MKI67	394287	12.1	19.1	7.5e-35
	chr10	131517021	131517243	MIR4297	124396	37.4	118.05	7.92e-196
	chr10	132188278	132188500	GLRX3	253639	21.8	137.49	8.29e-118
	chr10	132893017	132893239	MIR378C	132086	72.9	459.68	0
	chr10	133609869	133610091	LINC01164	12445	17.2	54.16	1.62e-72
	chr10	133829334	133829556	BNIP3	33899	38.3	60.41	2.73e-164
	chr10	134577203	134577425	NKX6-2	22113	7.05	44.44	1.29e-28
	chr10	134676994	134677216	NKX6-2	77457	9.69	61.11	2.13e-42
	chr10	135038977	135039199	UTF1	4580	9.47	59.72	1.28e-40
	chr10	135058537	135058759	MIR202	2366	28.4	179.15	5.94e-164
	chr10	135513566	135513788	DUX4L3	26389	133.9	844.37	0
	chr11	283869	284091	ATHL1	5048	18.5	29.16	1.72e-62
	chr11	435395	435617	ANO9	6395	7.93	12.5	3.98e-18
	chr11	439971	440193	ANO9	1819	11	17.36	8.35e-30
	chr11	706914	707136	EPS8L2	794	27.3	43.05	4.42e-106
	chr11	804300	804522	PIDD1	729	31.3	32.87	3.12e-109
	chr11	1073661	1073883	MUC2	993	17.4	27.43	1.1e-56
	chr11	1410895	1411117	BRSK2	21266	13	40.97	4.62e-49
	chr11	1598156	1598378	KRTAP5-AS1	4185	80.8	50.97	0
	chr11	1676582	1676804	FAM99A	10026	25.1	39.58	9.38e-95
	chr11	1851982	1852204	SYT8	3337	232.7	366.98	0
	chr11	2621352	2621574	KCNQ1OT1	99655	7.71	12.15	3.98e-18
	chr11	3271862	3272084	MRGPRE	18246	29.7	93.74	3.21e-145
	chr11	3317669	3317891	MRGPRE	64053	23.6	74.3	1.13e-108
	chr11	3427621	3427843	OR7E12P	14476	10.1	63.88	3.43e-44
	chr11	3457612	3457834	OR7E12P	44467	7.05	11.11	5.53e-16
	chr11	3637309	3637531	TRPC2	10160	57.2	180.54	0
	chr11	4475354	4475576	OR52K2	4829	22.9	18.05	7.06e-63
	chr11	4485563	4485785	OR52K2	15038	221.9	174.98	0
	chr11	4888381	4888603	OR51T1	14447	18.5	29.16	1.72e-62
	chr11	5475123	5475345	OR51I2	485	7.71	8.1	2.57e-14
	chr11	5612628	5612850	TRIM6	4482	12.1	38.19	7.22e-46
	chr11	5711678	5711900	TRIM22	861	164.9	104.02	0
	chr11	5887087	5887309	OR52E8	8155	81.5	85.64	0
	chr11	6825888	6826110	OR6A2	8749	16.3	17.13	7.34e-44
	chr11	8160167	8160389	RIC3	30202	55.7	58.56	1.41e-236
	chr11	8604895	8605117	STK33	10720	14.3	11.28	2.08e-31
	chr11	8650606	8650828	TRIM66	29556	26	40.97	5.79e-98
	chr11	8854272	8854494	ST5	22048	12.1	38.19	7.22e-46
	chr11	9075567	9075789	MIR5691	36138	7.49	23.61	1.48e-23
	chr11	9166861	9167083	KRT8P41	50951	13.9	8.75	1.43e-25
	chr11	9232406	9232628	DENND5A	54246	15	15.74	5.46e-39
	chr11	9497056	9497278	ZNF143	14544	42.7	134.71	1.86e-229
	chr11	9631591	9631813	WEE1	36363	156.5	70.53	0
	chr11	9823892	9824114	LOC101928008	36576	26.4	10.42	8.5e-54
	chr11	9967775	9967997	LOC101928008	107086	10.6	11.11	3.49e-23
	chr11	10066196	10066418	LOC101928008	205507	234.9	370.45	0
	chr11	10521860	10522082	MIR4485	7792	28.6	22.57	1.98e-86
	chr11	10681190	10681412	MRVI1	33710	12.8	20.14	1.92e-37
	chr11	10921063	10921285	ZBED5-AS1	41299	22.7	14.3	3.61e-55
	chr11	11414489	11414711	CSNK2A3	39585	15	15.74	5.46e-39
	chr11	11605910	11606132	GALNT18	37430	9.03	9.49	4.16e-18
	chr11	11697342	11697564	MIR4299	19073	14.5	15.28	1.32e-36
	chr11	12087567	12087789	MICAL2	44335	59.4	37.5	2.46e-217
	chr11	12101548	12101770	MICAL2	30354	17.8	56.24	5.27e-76
	chr11	12830595	12830817	TEAD1	134626	21.8	17.19	6.83e-58
	chr11	12980645	12980867	LINC00958	30229	10.1	15.97	3.77e-26
	chr11	13458371	13458593	BTBD10	26246	7.27	22.91	3.42e-22
	chr11	13688327	13688549	FAR1	1658	12.5	9.89	3.01e-25
	chr11	14446817	14447039	RRAS2	66087	7.27	11.46	5.53e-16
	chr11	15117445	15117667	INSC	16304	9.91	10.42	4.13e-21
	chr11	16654457	16654679	C11orf58	105470	19.8	62.49	1.19e-86
	chr11	17134383	17134605	RPS13	35163	54.2	42.7	5.79e-207
	chr11	17391468	17391690	NCR3LG1	18159	26.6	28.01	1.86e-88
	chr11	17400266	17400488	KCNJ11	9719	26.2	20.66	9.47e-76
	chr11	17493091	17493313	ABCC8	5080	13.2	20.83	9.34e-39
	chr11	17909196	17909418	SERGEF	125292	14.8	23.26	1.81e-45
	chr11	18921691	18921913	MRGPRX1	34637	6.61	10.42	6.44e-14
	chr11	19554931	19555153	NAV2-AS4	9306	14.3	22.57	4.16e-44
	chr11	20072138	20072360	NAV2-AS2	1289	7.71	24.3	6.18e-25
	chr11	20496493	20496715	PRMT3	87417	12.8	8.05	8.55e-23
	chr11	20505579	20505801	PRMT3	96503	51.3	26.97	6.5e-165
	chr11	22372703	22372925	SLC17A6	13036	11	8.68	2.07e-20
	chr11	22698837	22699059	GAS2	9183	6.38	20.14	1.59e-19
	chr11	27537476	27537698	MIR8087	882	19.4	122.21	5.18e-103
	chr11	27545759	27545981	MIR8087	9165	15.9	16.67	2.08e-41
	chr11	28161470	28161692	METTL15	31672	78.6	82.63	0
	chr11	28312624	28312846	METTL15	182826	34.8	109.71	2.57e-177
	chr11	28542727	28542949	MIR8068	43632	177	279.14	0
	chr11	30219464	30219686	FSHB	32878	27.7	87.49	1.77e-133
	chr11	32102797	32103019	RCN1	9459	16.7	10.55	2.05e-34
	chr11	32325249	32325471	WT1	126893	71.8	56.59	7.62e-302
	chr11	32597106	32597328	EIF3M	7986	7.27	22.91	3.42e-22
	chr11	33067463	33067685	TCP11L1	6500	14.8	11.63	1.8e-32
	chr11	33083065	33083287	LINC00294	14410	39	20.48	2.27e-111
	chr11	34268435	34268657	ABTB2	110899	14.8	46.52	6.83e-59
	chr11	34657748	34657970	EHF	15160	14.3	9.03	1.8e-27
	chr11	34661913	34662135	EHF	19325	17	17.82	2.39e-46
	chr11	34707035	34707257	EHF	64447	126.6	66.55	0
	chr11	35059303	35059525	MIR1343	95919	14.3	45.13	3.14e-57
	chr11	35078071	35078293	LOC100507144	81287	6.16	9.72	6.48e-13
	chr11	35947992	35948214	LDLRAD3	17399	11.7	73.6	2.37e-53
	chr11	36039809	36040031	MIR3973	8161	50.6	22.82	7.6e-152
	chr11	36183857	36184079	COMMD9	126921	5.5	17.36	1.09e-15
	chr11	38616553	38616775	LOC103312105	51132	5.72	18.05	6.06e-17
	chr11	42793429	42793651	HNRNPKP3	497269	6.61	41.66	2.38e-25
	chr11	43148930	43149152	HNRNPKP3	141768	9.25	58.33	1.28e-40
	chr11	43664676	43664898	HSD17B12	37246	14.1	14.81	1.98e-35
	chr11	43973289	43973511	C11orf96	9183	7.71	8.1	2.57e-14
	chr11	44586194	44586416	CD82	726	11.2	11.8	2.63e-25
	chr11	46432225	46432447	CHRM4	24118	9.47	14.93	8.8e-24
	chr11	46679368	46679590	ATG13	40542	39.9	41.89	1.18e-151
	chr11	46709120	46709342	ARHGAP1	12874	7.05	11.11	5.53e-16
	chr11	47236427	47236649	DDB2	0	153.9	161.79	0
	chr11	47270338	47270560	ACP2	0	5.94	37.5	3.61e-22
	chr11	47604673	47604895	FAM180B	3336	9.47	59.72	1.28e-40
	chr11	47673005	47673227	MTCH2	8799	6.83	43.05	5.66e-27
	chr11	47871754	47871976	NUP160	1697	5.06	15.97	3e-13
	chr11	56977923	56978145	APLNR	26783	9.91	10.42	4.13e-21
	chr11	57304215	57304437	SMTNL1	5678	6.16	9.72	6.48e-13
	chr11	57555957	57556179	CTNND1	26723	18.3	57.63	9.24e-78
	chr11	58426064	58426286	CNTF	35918	43.2	34.02	3.91e-153
	chr11	58561706	58561928	GLYATL2	50070	11.4	18.05	2.64e-32
	chr11	58937247	58937469	DTX4	2344	15.6	24.65	1.3e-49
	chr11	59341027	59341249	MIR3162	21383	14.5	15.28	1.32e-36
	chr11	59364574	59364796	MIR3162	1943	7.71	12.15	3.98e-18
	chr11	60028283	60028505	MS4A4A	19510	22.9	36.11	1.07e-83
	chr11	60331152	60331374	MS4A13	48266	177.9	140.27	0
	chr11	60639603	60639825	ZP1	4588	4.18	26.39	1.19e-14
	chr11	60703174	60703396	TMEM132A	11261	9.03	28.47	1.25e-30
	chr11	61038358	61038580	VWCE	24209	6.38	40.27	2.38e-25
	chr11	61068126	61068348	VWCE	5338	19.8	31.25	2.05e-68
	chr11	61465203	61465425	DAGLA	17298	8.37	26.39	9.47e-28
	chr11	61526043	61526265	DKFZP434K028	907	14.8	11.63	1.8e-32
	chr11	61548394	61548616	MIR611	11418	6.83	10.76	6.11e-15
	chr11	61587684	61587906	FADS1	3155	93.6	295.11	0
	chr11	61748792	61749014	FTH1	13660	36.3	19.1	5.26e-101
	chr11	61766548	61766770	FTH1	31416	137.8	144.89	0
	chr11	61863724	61863946	INCENP	27500	24.7	25.92	1.95e-78
	chr11	61866873	61867095	INCENP	24351	25.1	158.32	1.12e-141
	chr11	61990417	61990639	SCGB2A1	14277	39	40.97	8.36e-147
	chr11	62053160	62053382	SCGB1D4	13155	16.7	105.55	1.67e-84
	chr11	62198636	62198858	SCGB1A1	12129	6.61	10.42	6.44e-14
	chr11	62367475	62367697	MTA2	1616	50	52.54	3.5e-205
	chr11	63313306	63313528	MIR3680-1	7597	12.3	9.72	2.95e-24
	chr11	63559030	63559252	C11orf84	21672	64.3	101.38	2.74e-320
	chr11	64092267	64092489	PRDX5	6707	11.4	9.03	2.61e-22
	chr11	64204919	64205141	LOC100996455	11389	18.1	14.23	1.44e-43
	chr11	64287019	64287241	SLC22A11	35858	11.2	17.71	4.76e-31
	chr11	64610534	64610756	CDC42BPG	1286	44.7	17.62	7.15e-119
	chr11	64808693	64808915	SAC3D1	317	16.5	10.42	2.05e-34
	chr11	64921481	64921703	SPDYC	16005	19.8	31.25	2.05e-68
	chr11	65188689	65188911	NEAT1	1359	142.9	90.13	0
	chr11	65551503	65551725	OVOL1	2781	9.91	31.25	4.62e-35
	chr11	65560663	65560885	OVOL1-AS1	2324	11	11.57	3.08e-24
	chr11	65617214	65617436	CFL1	8369	6.38	10.07	6.44e-14
	chr11	65666594	65666816	FOSL1	1182	22.9	72.22	6.09e-105
	chr11	66104426	66104648	RIN1	426	20.3	15.97	8.38e-52
	chr11	66386810	66387032	RBM14	2757	17.2	13.54	2.78e-41
	chr11	66386810	66387032	RBM14-RBM4	2757	17.2	13.54	2.78e-41
	chr11	66786700	66786922	SYT12	3269	7.71	8.1	2.57e-14
	chr11	66825156	66825378	RHOD	867	11.4	12.04	2.19e-26
	chr11	66850005	66850227	RHOD	25716	30.2	23.78	2.9e-93
	chr11	67423852	67424074	ACY3	5722	35.2	55.55	2.03e-148
	chr11	67965856	67966078	SUV420H1	14707	149.9	78.81	0
	chr11	68104848	68105070	LRP5	24771	11.4	36.11	1.02e-42
	chr11	68215859	68216081	PPP6R3	12106	5.06	15.97	3e-13
	chr11	68587865	68588087	CPT1A	21313	6.61	20.83	1.59e-19
	chr11	68888468	68888690	LOC338694	50341	15	47.22	1.45e-60
	chr11	68917153	68917375	LOC338694	21656	32.4	204.15	1.24e-193
	chr11	69209855	69210077	LOC101928292	90253	7.71	48.61	5.83e-32
	chr11	69316434	69316656	LOC101928292	16105	21.1	133.32	1.51e-113
	chr11	69325362	69325584	LOC101928292	25033	36.5	38.42	1.29e-135
	chr11	69624388	69624610	FGF3	9583	32.6	11.42	3.03e-69
	chr11	69811902	69812124	LOC101928443	99354	4.18	26.39	1.19e-14
	chr11	70371259	70371481	SHANK2-AS1	105719	5.06	15.97	3e-13
	chr11	70460460	70460682	SHANK2-AS1	16518	30.4	15.97	2.15e-77
	chr11	70490062	70490284	SHANK2-AS1	12863	53.9	170.12	5.1e-308
	chr11	70615750	70615972	SHANK2-AS3	92924	33.2	209.7	2.9e-198
	chr11	70971356	70971578	FLJ42102	162823	13.9	21.87	2.06e-41
	chr11	71513909	71514131	ALG1L9P	10775	8.15	25.69	2.47e-26
	chr11	71656236	71656458	RNF121	16468	7.93	50	5.83e-32
	chr11	72008636	72008858	PHOX2A	53416	5.28	16.67	1.87e-14
	chr11	72354748	72354970	MIR139	28574	8.37	13.19	2.43e-20
	chr11	72542845	72543067	ATG16L2	17394	26.9	28.24	1.86e-88
	chr11	72897480	72897702	P2RY2	31801	12.1	9.55	2.95e-24
	chr11	72898896	72899118	P2RY2	30385	11.4	12.04	2.19e-26
	chr11	72953872	72954094	P2RY6	21504	9.91	10.42	4.13e-21
	chr11	73846355	73846577	C2CD3	35488	148.4	66.86	0
	chr11	74909686	74909908	SLCO2B1	38842	8.15	8.56	3.07e-15
	chr11	75067615	75067837	ARRB1	4740	8.81	13.89	1.8e-21
	chr11	76278425	76278647	LRRC32	102398	16.5	52.08	4.65e-69
	chr11	76495650	76495872	LOC101928837	1544	18.5	29.16	1.72e-62
	chr11	77271874	77272096	AQP11	28585	24.7	11.11	8.15e-52
	chr11	77306132	77306354	AQP11	5452	7.93	50	5.83e-32
	chr11	77344465	77344687	CLNS1A	4165	6.16	9.72	6.48e-13
	chr11	77514252	77514474	RSF1	17407	9.25	58.33	1.28e-40
	chr11	77878109	77878331	KCTD21	21334	7.93	8.33	2.57e-14
	chr11	78867111	78867333	MIR708	245821	28.6	45.13	1.15e-112
	chr11	78879832	78880054	MIR708	233100	16.7	105.55	1.67e-84
	chr11	83372845	83373067	CCDC90B	375395	70.2	44.3	4.05e-272
	chr11	83744858	83745080	CCDC90B	747408	10.3	32.64	1.44e-36
	chr11	83887098	83887320	CCDC90B	889648	25.5	80.55	5.2e-120
	chr11	84995504	84995726	DLG2	342589	36.8	28.99	1.12e-121
	chr11	85518050	85518272	SYTL2	3931	21.1	13.33	1.81e-49
	chr11	86046540	86046762	C11orf73	33287	112.3	50.59	0
	chr11	86290226	86290448	ME3	93231	13.7	43.05	6.23e-54
	chr11	86377323	86377545	ME3	6134	16.7	13.19	4.98e-39
	chr11	86431169	86431391	ME3	47491	16.1	16.9	1.25e-42
	chr11	86739822	86740044	TMEM135	8843	53.9	56.71	9.01e-228
	chr11	87174683	87174905	TMEM135	425797	17.4	13.71	2.78e-41
	chr11	87315299	87315521	TMEM135	566413	47.1	74.3	1.91e-215
	chr11	89061599	89061821	TYR	150559	7.27	45.83	1.29e-28
	chr11	90672682	90672904	MIR4490	383657	9.03	14.23	1.28e-22
	chr11	92576691	92576913	MTNR1B	125877	5.06	15.97	3e-13
	chr11	92753536	92753758	MTNR1B	50747	31	97.91	3.86e-153
	chr11	93752354	93752576	HEPHL1	1803	17.2	27.08	1.1e-56
	chr11	93838008	93838230	PANX1	23865	17.4	54.86	1.62e-72
	chr11	93845837	93846059	PANX1	16036	13	8.19	8.55e-23
	chr11	93888440	93888662	PANX1	26346	8.15	25.69	2.47e-26
	chr11	94038478	94038700	FOLR4	104	24.4	77.08	2.57e-114
	chr11	94427685	94427907	AMOTL1	73602	8.59	13.54	1.8e-21
	chr11	94439427	94439649	AMOTL1	61860	9.25	9.72	4.29e-19
	chr11	94768546	94768768	KDM4E	10124	31	16.32	8.3e-80
	chr11	94798603	94798825	SRSF8	1217	190.2	85.71	0
	chr11	95302143	95302365	FAM76B	220590	41.8	65.97	4.42e-184
	chr11	95916360	95916582	MIR1260B	158021	11.4	12.04	2.19e-26
	chr11	97046360	97046582	MIR7976	444314	9.03	28.47	1.25e-30
	chr11	97562775	97562997	MIR7976	71880	16.3	17.13	7.34e-44
	chr11	97614246	97614468	MIR7976	123351	26	163.87	4.33e-146
	chr11	100383342	100383564	ARHGAP42	174844	13.7	43.05	6.23e-54
	chr11	100560658	100560880	ARHGAP42	2251	31.3	19.72	2.38e-88
	chr11	100677953	100678175	ARHGAP42	119546	15.6	12.33	1.04e-35
	chr11	101305056	101305278	MIR3920	85359	28	29.4	2.69e-94
	chr11	102127068	102127290	BIRC3	60892	168	176.6	0
	chr11	103392423	103392645	MIR4693	327990	65.4	206.23	0
	chr11	106044847	106045069	LOC101928535	77066	15.6	49.3	6.17e-64
	chr11	106100822	106101044	LOC101928535	21091	27.3	172.21	3.24e-157
	chr11	106660214	106660436	GUCY1A2	228736	8.37	26.39	9.47e-28
	chr11	107029894	107030116	GUCY1A2	140723	12.8	80.55	6.76e-61
	chr11	107103217	107103439	GUCY1A2	214046	15	15.74	5.46e-39
	chr11	107856731	107856953	CUL5	22456	5.5	17.36	1.09e-15
	chr11	107888322	107888544	CUL5	8914	11.7	12.27	2.19e-26
	chr11	108109063	108109285	ATM	15504	11.7	9.2	2.61e-22
	chr11	108205978	108206200	ATM	112419	53.7	56.48	5.11e-226
	chr11	108519192	108519414	DDX10	16339	22.2	17.53	2.26e-60
	chr11	108819074	108819296	DDX10	283322	189.8	74.82	0
	chr11	109213051	109213273	C11orf87	79574	24.9	78.47	3.29e-116
	chr11	109567044	109567266	C11orf87	274198	19.6	10.3	1.59e-39
	chr11	109893338	109893560	ZC3H12C	70528	41.6	21.87	2.66e-123
	chr11	110224170	110224392	RDX	56733	15.4	24.3	3.2e-48
	chr11	111098540	111098762	C11orf53	27946	11.4	18.05	2.64e-32
	chr11	111238207	111238429	POU2AF1	11729	13	13.66	8e-31
	chr11	111381152	111381374	BTG4	1706	77.1	60.76	0
	chr11	111461864	111462086	SIK2	11085	7.71	8.1	2.57e-14
	chr11	111590311	111590533	PPP2R1B	46637	5.06	15.97	3e-13
	chr11	112259372	112259594	LOC101928823	95475	9.03	9.49	4.16e-18
	chr11	112496679	112496901	LOC387810	70154	18.1	11.39	1.44e-38
	chr11	113215103	113215325	TTC12	29852	32.6	25.69	5.1e-103
	chr11	113255400	113255622	ANKK1	2892	39	15.36	5.46e-97
	chr11	113317722	113317944	MIR4301	2867	15.2	23.96	7.68e-47
	chr11	114069427	114069649	NNMT	96887	15.2	47.91	1.45e-60
	chr11	114297141	114297363	REXO2	12746	10.3	8.16	1.46e-18
	chr11	117045127	117045349	SIDT2	4591	11.4	12.04	2.19e-26
	chr11	117164981	117165203	BACE1-AS	2919	13.2	41.66	1.13e-50
	chr11	117377106	117377328	CEP164	178535	7.93	12.5	3.98e-18
	chr11	117615504	117615726	DSCAML1	52251	5.28	16.67	1.87e-14
	chr11	117719929	117720151	FXYD2	24470	7.49	11.8	4.79e-17
	chr11	117963755	117963977	TMPRSS4-AS1	6247	11.7	9.2	2.61e-22
	chr11	118859023	118859245	CCDC84	9599	7.49	11.8	4.79e-17
	chr11	119276123	119276345	THY1	17902	11.2	35.41	3.66e-41
	chr11	119483616	119483838	PVRL1	115598	12.5	19.79	3.84e-36
	chr11	119567165	119567387	PVRL1	32049	97.5	102.54	0
	chr11	119640341	119640563	PVRL1	40906	9.69	15.28	5.86e-25
	chr11	119716488	119716710	PVRL1	117053	12.3	12.96	1.39e-28
	chr11	119895725	119895947	TRIM29	112917	123.3	388.85	0
	chr11	120330845	120331067	GRIK4	51399	17.2	18.05	1.33e-47
	chr11	121337434	121337656	SORL1	14522	7.93	12.5	3.98e-18
	chr11	122213116	122213338	MIR100HG	139346	24.9	26.16	7.51e-80
	chr11	123487301	123487523	SCN3B	37793	10.3	16.32	2.35e-27
	chr11	123549028	123549250	SCN3B	23713	15.6	24.65	1.3e-49
	chr11	124093169	124093391	OR8G2	1954	28.8	45.48	1.15e-112
	chr11	124510664	124510886	TBRG1	17922	8.15	12.85	3.17e-19
	chr11	124816844	124817066	CCDC15	6952	17.6	11.11	1.62e-37
	chr11	125439285	125439507	EI24	2	26.2	20.66	9.47e-76
	chr11	126146809	126147031	TIRAP	5952	19.6	12.36	6.26e-44
	chr11	129495918	129496140	TMEM45B	189602	72.9	76.61	0
	chr11	129511903	129512125	TMEM45B	173617	14.5	11.46	2.08e-31
	chr11	129906996	129907218	APLP2	32499	4.84	15.28	3e-13
	chr11	130049002	130049224	ST14	19320	7.71	12.15	3.98e-18
	chr11	130752712	130752934	SNX19	33449	19.8	31.25	2.05e-68
	chr12	704631	704853	NINJ2	67903	9.47	9.95	4.29e-19
	chr12	957022	957244	WNK1	94933	114.3	60.06	0
	chr12	1554408	1554630	LINC00942	55028	4.84	15.28	3e-13
	chr12	2113718	2113940	DCP1B	41	171.1	134.88	0
	chr12	2499424	2499646	CACNA1C-IT3	120482	14.5	22.91	4.16e-44
	chr12	2507085	2507307	CACNA1C-IT3	128143	8.15	8.56	3.07e-15
	chr12	2806350	2806572	CACNA1C-AS1	6027	52.8	55.55	8.97e-221
	chr12	3326598	3326820	TSPAN9	140077	22.2	23.38	1.09e-68
	chr12	3409138	3409360	PRMT8	81156	25.3	11.41	6.47e-54
	chr12	4222050	4222272	CCND2	160631	62.5	65.73	4.97e-276
	chr12	4592188	4592410	FGF6	37408	12.8	13.42	8e-31
	chr12	5249247	5249469	KCNA5	96162	33	26.04	7.61e-106
	chr12	6381669	6381891	PLEKHG6	37712	14.1	22.22	9.37e-43
	chr12	6616873	6617095	SCARNA10	2294	92.7	73.08	0
	chr12	7001949	7002171	DSTNP2	8103	10.1	15.97	3.77e-26
	chr12	7067423	7067645	MIR200C	5218	9.47	29.86	4.3e-32
	chr12	7146795	7147017	LPCAT3	20953	18.9	11.94	9.19e-42
	chr12	7825242	7825464	APOBEC1	6740	59.9	47.22	1.07e-236
	chr12	7878654	7878876	DPPA3	14565	7.71	8.1	2.57e-14
	chr12	8028645	8028867	SLC2A14	14926	10.3	32.64	1.44e-36
	chr12	8118181	8118403	SLC2A3	29289	8.37	8.8	3.53e-16
	chr12	9108783	9109005	M6PR	6426	38.7	40.74	8.36e-147
	chr12	9878141	9878363	CLECL1	7533	29.1	45.83	2.53e-114
	chr12	10063762	10063984	CLEC2A	20997	58.6	61.57	1.4e-252
	chr12	10225964	10226186	CLEC1A	25420	14.3	11.28	2.08e-31
	chr12	10341610	10341832	TMEM52B	10053	4.84	15.28	3e-13
	chr12	10870050	10870272	YBX3	5682	77.3	60.93	0
	chr12	11394835	11395057	PRB3	27585	41.6	32.81	1.65e-145
	chr12	11438161	11438383	PRB3	15520	6.61	41.66	2.38e-25
	chr12	11481615	11481837	PRB4	18246	32.1	33.79	8.41e-114
	chr12	11496887	11497109	PRB1	11416	40.5	42.59	6.65e-155
	chr12	11522096	11522318	PRB1	13572	45.8	24.07	5.27e-141
	chr12	11561133	11561355	PRB2	12635	42.1	265.25	9.96e-265
	chr12	11788343	11788565	ETV6	14224	23.6	10.61	1.05e-48
	chr12	11983548	11983770	RNU6-19P	95338	21.4	67.36	1.02e-95
	chr12	12200040	12200262	BCL2L14	23617	38.7	122.21	3.76e-204
	chr12	12598894	12599116	LOH12CR1	88874	23.1	72.91	6.09e-105
	chr12	12954258	12954480	DDX47	11801	8.81	13.89	1.8e-21
	chr12	13252791	13253013	GSG1	3618	14.3	22.57	4.16e-44
	chr12	13259665	13259887	GSG1	3035	7.71	12.15	3.98e-18
	chr12	13492587	13492809	C12orf36	36871	34.6	21.8	7.53e-103
	chr12	13724041	13724263	C12orf36	194362	12.8	40.27	4.62e-49
	chr12	14470354	14470576	ATF7IP	47991	14.5	15.28	1.32e-36
	chr12	14652501	14652723	LOC101928290	67944	52.2	164.57	1.13e-294
	chr12	15688320	15688542	PTPRO	10737	100.8	106.01	0
	chr12	16089758	16089980	DERA	25572	393.2	1240.17	0
	chr12	16462777	16462999	SLC15A5	32158	11.9	37.5	2.75e-44
	chr12	16949264	16949486	LMO3	188116	10.3	10.88	3.86e-22
	chr12	17901644	17901866	MIR3974	75411	14.1	88.88	1.3e-68
	chr12	18502686	18502908	PIK3C2G	88212	42.1	33.16	5.01e-147
	chr12	18539600	18539822	PIK3C2G	125126	68.9	72.45	7.96e-313
	chr12	19234355	19234577	PLEKHA5	48050	13.9	87.49	1.14e-66
	chr12	19249890	19250112	PLEKHA5	32515	13	10.24	3.01e-26
	chr12	19301274	19301496	PLEKHA5	18648	13	10.24	3.01e-26
	chr12	19584861	19585083	AEBP2	7526	255	268.03	0
	chr12	20628422	20628644	PDE3A	106243	36.1	56.94	6.41e-152
	chr12	21971765	21971987	KCNJ8	44010	14.3	15.04	1.32e-36
	chr12	22254782	22255004	CMAS	55672	5.28	16.67	1.87e-14
	chr12	22984006	22984228	ETNK1	205930	53.5	24.1	3.57e-164
	chr12	25147354	25147576	C12orf77	2798	10.1	15.97	3.77e-26
	chr12	25207120	25207342	LRMP	1939	38.5	30.38	1.65e-130
	chr12	25864278	25864500	IFLTD1	62782	81.9	86.1	0
	chr12	26070310	26070532	RASSF8-AS1	41844	7.49	11.8	4.79e-17
	chr12	27165893	27166115	TM7SF3	1225	20.5	32.29	2.03e-71
	chr12	27379270	27379492	STK38L	17587	6.16	9.72	6.48e-13
	chr12	27702168	27702390	PPFIBP1	25123	28.4	89.58	2.25e-137
	chr12	28385664	28385886	CCDC91	24248	22.5	70.83	3.12e-101
	chr12	29286534	29286756	FAR2	15181	16.1	25.34	5.21e-51
	chr12	29786975	29787197	OVCH1	136356	10.1	10.65	4.13e-21
	chr12	30935560	30935782	LINC00941	12834	6.16	19.44	3.18e-18
	chr12	31589511	31589733	FAM60A	110352	34.1	53.81	1.82e-141
	chr12	31727270	31727492	DENND5B-AS1	15366	13	10.24	3.01e-26
	chr12	31907220	31907442	AMN1	25112	11.4	9.03	2.61e-22
	chr12	31999949	32000171	H3F3C	54774	6.16	9.72	6.48e-13
	chr12	32365405	32365627	BICD1	105220	4.62	29.16	4.25e-16
	chr12	32401841	32402063	BICD1	141656	94.5	74.47	0
	chr12	34382280	34382502	ALG10	207064	14.5	22.91	4.16e-44
	chr12	39449407	39449629	CPNE8	149987	7.27	11.46	5.53e-16
	chr12	40422199	40422421	SLC2A13	77241	32.6	34.26	2.47e-115
	chr12	40552798	40553020	SLC2A13	53137	8.81	9.26	3.9e-17
	chr12	40803302	40803524	MUC19	16106	30.8	32.4	1.02e-107
	chr12	40868559	40868781	MUC19	81363	56.6	89.23	8.41e-273
	chr12	41332620	41332842	CNTN1	110880	23.1	72.91	6.09e-105
	chr12	43980524	43980746	ADAMTS20	34800	16.3	17.13	7.34e-44
	chr12	44423078	44423300	TMEM117	193414	45.6	35.93	6.08e-164
	chr12	44440435	44440657	TMEM117	210771	8.59	27.08	3.5e-29
	chr12	45276660	45276882	NELL2	30830	37.4	118.05	7.92e-196
	chr12	46038885	46039107	LINC00938	82598	26.2	13.77	3.62e-62
	chr12	46465178	46465400	SCAF11	80777	44.7	17.62	7.15e-119
	chr12	46501478	46501700	SCAF11	117077	57.7	36.39	6.22e-208
	chr12	46971313	46971535	SLC38A2	204668	40.7	12.85	1.28e-92
	chr12	47255206	47255428	SLC38A4	35426	4.84	15.28	3e-13
	chr12	47697978	47698200	PCED1B-AS1	87752	16.7	13.19	4.98e-39
	chr12	47950144	47950366	RPAP3	149479	160.9	253.8	0
	chr12	48162272	48162494	SLC48A1	4474	22.7	17.88	1.27e-61
	chr12	48203397	48203619	HDAC7	10145	10.1	15.97	3.77e-26
	chr12	48270388	48270610	VDR	28205	13.9	43.75	6.23e-54
	chr12	48604358	48604580	OR10AD1	7283	42.3	26.66	4.32e-136
	chr12	48748509	48748731	ZNF641	3480	6.61	20.83	1.59e-19
	chr12	48858922	48859144	ANP32D	7305	58.1	183.32	0
	chr12	48996054	48996276	LALBA	32225	158.1	83.09	0
	chr12	49682839	49683061	PRPH	5849	9.25	14.58	8.8e-24
	chr12	50564209	50564431	CERS5	2893	125.5	79.16	0
	chr12	50640666	50640888	MIR1293	12671	10.3	8.16	1.46e-18
	chr12	50774226	50774448	FAM186A	15958	9.25	29.16	4.3e-32
	chr12	50812221	50812443	LARP4	17629	18.5	14.58	6.94e-46
	chr12	51036634	51036856	ATF1	120934	19.8	31.25	2.05e-68
	chr12	51322212	51322434	METTL7A	3678	16.3	25.69	2.04e-52
	chr12	52270717	52270939	ANKRD33	10855	4.84	15.28	3e-13
	chr12	52569869	52570091	KRT80	15694	139.6	110.06	0
	chr12	54309005	54309227	HOXC13	23350	37.9	17.06	6.4e-100
	chr12	54569752	54569974	SMUG1	12805	11.2	11.8	2.63e-25
	chr12	55075107	55075329	DCD	32958	6.83	21.53	7.54e-21
	chr12	55329125	55329347	TESPA1	38170	7.71	8.1	2.57e-14
	chr12	55566532	55566754	OR9K2	42979	41.4	65.27	2.89e-182
	chr12	56435653	56435875	RPS26	0	6.83	10.76	6.11e-15
	chr12	56445710	56445932	RPS26	10024	9.91	10.42	4.13e-21
	chr12	56829152	56829374	TIMELESS	13827	8.37	13.19	2.43e-20
	chr12	57425275	57425497	TAC3	14931	91.8	41.37	0
	chr12	57489964	57490186	NAB2	7287	188.5	198.13	0
	chr12	57521495	57521717	LRP1	566	16.7	52.77	4.65e-69
	chr12	57723785	57724007	R3HDM2	19539	28.2	22.22	9.9e-84
	chr12	57776047	57776269	INHBC	52200	22.5	70.83	3.12e-101
	chr12	57839770	57839992	INHBE	9105	8.81	27.78	3.5e-29
	chr12	57916007	57916229	MBD6	431	16.1	8.45	7.46e-29
	chr12	59300802	59301024	LRIG3	13296	20.7	32.64	6.24e-73
	chr12	59434923	59435145	LRIG3	120604	13.9	10.94	2.58e-29
	chr12	59747766	59747988	SLC16A7	241834	24	37.84	2.12e-88
	chr12	59751647	59751869	SLC16A7	237953	100.6	79.33	0
	chr12	61315001	61315223	FAM19A2	1271398	77.7	35.02	3.05e-277
	chr12	61437715	61437937	FAM19A2	1148684	13.9	10.94	2.58e-29
	chr12	62087638	62087860	FAM19A2	498761	20.5	21.53	1.41e-60
	chr12	62093206	62093428	FAM19A2	493193	11.9	37.5	2.75e-44
	chr12	62586723	62586945	FAM19A2	103	82.3	32.46	1.87e-284
	chr12	63614077	63614299	AVPR1A	67487	51.1	53.7	4.38e-212
	chr12	64563831	64564053	C12orf66	52024	7.93	50	5.83e-32
	chr12	64916061	64916283	TBK1	70221	93.8	49.3	0
	chr12	65028562	65028784	MIR548C	12273	94.2	99.07	0
	chr12	65101189	65101411	GNS	51816	18.3	115.27	1.04e-94
	chr12	65377667	65377889	FLJ41278	100113	17.8	8.03	3.09e-31
	chr12	66033478	66033700	LOC100507065	2453	84.1	88.42	0
	chr12	66064691	66064913	LOC100507065	28539	9.47	14.93	8.8e-24
	chr12	66156378	66156600	HMGA2	61641	14.5	11.46	2.08e-31
	chr12	66408795	66409017	MIR6074	8490	45.8	28.89	5.64e-152
	chr12	66526909	66527131	LLPH	2376	14.3	45.13	3.14e-57
	chr12	67468054	67468276	LOC102724421	21789	12.8	40.27	4.62e-49
	chr12	68064823	68065045	DYRK2	22311	7.27	22.91	3.42e-22
	chr12	68435932	68436154	IFNG-AS1	52707	106.3	47.91	0
	chr12	68525873	68526095	IFNG	27427	15.6	16.43	2.08e-41
	chr12	68805192	68805414	LOC100507195	39851	36.1	37.96	1.88e-132
	chr12	69175220	69175442	LOC100130075	23833	27.7	29.16	7.91e-93
	chr12	69181406	69181628	LOC100130075	17647	25.1	15.83	1.33e-64
	chr12	69193936	69194158	LOC100130075	5117	45.6	47.91	2.23e-181
	chr12	69202630	69202852	MDM2	678	307.4	161.56	0
	chr12	70484881	70485103	CNOT2	151672	74.4	58.68	6.26e-316
	chr12	70914661	70914883	PTPRB	88742	34.1	15.38	2.12e-85
	chr12	71186457	71186679	PTPRR	38069	22.5	14.17	5.13e-54
	chr12	71772810	71773032	LGR5	60519	14.3	45.13	3.14e-57
	chr12	72119600	72119822	RAB21	28837	56.6	44.61	4.41e-220
	chr12	72978729	72978951	TRHDE-AS1	311440	7.93	8.33	2.57e-14
	chr12	73369000	73369222	LOC101928137	183749	81	85.18	0
	chr12	73584526	73584748	LOC101928137	31556	16.3	17.13	7.34e-44
	chr12	73801563	73801785	LOC101928137	248593	7.93	12.5	3.98e-18
	chr12	73953140	73953362	LOC101928137	400170	37.2	29.34	1.32e-124
	chr12	74085368	74085590	LOC101928137	532398	32.4	51.04	7.28e-133
	chr12	74504303	74504525	LOC100507377	181887	6.83	21.53	7.54e-21
	chr12	74505447	74505669	LOC100507377	180743	7.93	25	6.18e-25
	chr12	75339482	75339704	KCNC2	263825	21.1	16.67	1.95e-55
	chr12	75571796	75572018	KCNC2	31511	152.4	96.1	0
	chr12	75827302	75827524	GLIPR1L2	42452	26.9	42.36	8.09e-103
	chr12	76054072	76054294	KRR1	148654	24.2	15.28	5.06e-61
	chr12	76180917	76181139	PHLDA1	244418	5.5	34.72	1.3e-20
	chr12	76272110	76272332	PHLDA1	153225	8.81	13.89	1.8e-21
	chr12	76409018	76409240	PHLDA1	16317	55	173.6	1.00e-314
	chr12	76532925	76533147	NAP1L1	54187	12.5	9.89	3.01e-25
	chr12	76938472	76938694	OSBPL8	14896	35.7	16.07	2.2e-91
	chr12	76981954	76982176	OSBPL8	28365	6.16	19.44	3.18e-18
	chr12	77001992	77002214	OSBPL8	48403	20.3	63.88	1.88e-88
	chr12	77244114	77244336	CSRP2	28464	53.7	28.24	1.94e-176
	chr12	77459751	77459973	E2F7	391	51.3	26.97	6.5e-165
	chr12	77722174	77722396	E2F7	262814	18.5	29.16	1.72e-62
	chr12	77811582	77811804	E2F7	352222	9.03	9.49	4.16e-18
	chr12	78080619	78080841	NAV3	144229	32.6	25.69	5.1e-103
	chr12	78551103	78551325	NAV3	326034	252.3	795.76	0
	chr12	79139934	79140156	SYT1	117618	170	107.21	0
	chr12	80352558	80352780	PPP1R12A	23323	22.7	17.88	1.27e-61
	chr12	80368805	80369027	PPP1R12A	39570	8.37	8.8	3.53e-16
	chr12	81171928	81172150	LOC101928420	14995	72.9	57.46	4.11e-307
	chr12	83929759	83929981	TMTC2	848825	72.7	458.29	0
	chr12	85250050	85250272	SLC6A15	56337	8.37	8.8	3.53e-16
	chr12	86075066	86075288	RASSF9	155031	30.8	48.61	2.28e-124
	chr12	86150285	86150507	RASSF9	79812	10.6	8.33	1.76e-19
	chr12	86961488	86961710	MIR548AL	14759	13.9	43.75	6.23e-54
	chr12	87124081	87124303	MGAT4C	108379	20.3	31.94	6.5e-70
	chr12	87625662	87625884	MGAT4C	392981	35.9	37.73	1.88e-132
	chr12	88605038	88605260	TMTC3	68965	7.05	11.11	5.53e-16
	chr12	88953552	88953774	KITLG	20477	343.9	216.93	0
	chr12	89248082	89248304	LOC728084	165166	13.9	10.94	2.58e-29
	chr12	89328215	89328437	LOC728084	85033	9.69	10.18	4.28e-20
	chr12	89621592	89621814	DUSP6	124823	52.6	165.96	6.82e-297
	chr12	89712971	89713193	DUSP6	33444	14.1	11.11	2.34e-30
	chr12	90628294	90628516	LINC00936	525562	94.7	42.65	0
	chr12	92296772	92296994	C12orf79	239454	110.5	116.19	0
	chr12	92428742	92428964	C12orf79	107484	36.1	37.96	1.88e-132
	chr12	92928157	92928379	CLLU1OS	106233	37.2	29.34	1.32e-124
	chr12	92986109	92986331	C12orf74	110289	70	220.81	0
	chr12	93156671	93156893	PLEKHG7	26406	7.93	12.5	3.98e-18
	chr12	93178316	93178538	PLEKHG7	48051	140.5	73.84	0
	chr12	93367495	93367717	EEA1	44388	113.4	51.09	0
	chr12	93627974	93628196	LOC102724933	59832	7.93	8.33	2.57e-14
	chr12	94018977	94019199	CRADD	51953	22	11.57	7.8e-48
	chr12	94424111	94424333	PLXNC1	231965	11	69.44	1.2e-49
	chr12	94867113	94867335	CEP83-AS1	13334	63	49.65	1.52e-253
	chr12	94902439	94902661	CEP83-AS1	48660	15.2	47.91	1.45e-60
	chr12	94946876	94947098	MIR5700	8468	8.81	13.89	1.8e-21
	chr12	95015526	95015748	TMCC3	28577	16.3	25.69	2.04e-52
	chr12	95723913	95724135	MIR3685	20214	10.3	10.88	3.86e-22
	chr12	96005311	96005533	PGAM1P5	37499	7.93	12.5	3.98e-18
	chr12	96092369	96092591	PGAM1P5	49338	8.15	8.56	3.07e-15
	chr12	96607761	96607983	ELK3	19554	19.6	20.6	1.31e-56
	chr12	96613598	96613820	ELK3	25391	15.9	16.67	2.08e-41
	chr12	96955596	96955818	CDK17	161230	27.7	29.16	7.91e-93
	chr12	97146056	97146278	NEDD1	154724	13.9	21.87	2.06e-41
	chr12	97463127	97463349	NEDD1	162126	7.71	24.3	6.18e-25
	chr12	98269004	98269226	LOC643711	118709	9.25	14.58	8.8e-24
	chr12	98739223	98739445	SLC9A7P1	111479	40.7	42.82	1.56e-156
	chr12	98974303	98974525	SLC25A3	12879	26.6	168.04	9.46e-153
	chr12	98979749	98979971	SLC25A3	7433	30.4	31.94	1.06e-104
	chr12	99890966	99891188	FAM71C	150341	26.6	42.01	8.09e-103
	chr12	100030814	100031036	FAM71C	10493	15.9	99.99	1.77e-78
	chr12	100243245	100243467	ANKS1B	134966	9.91	15.62	3.77e-26
	chr12	100503297	100503519	UHRF1BP1L	33124	41.8	43.98	1.91e-161
	chr12	101147556	101147778	ANO4	147647	13.4	21.18	4.44e-40
	chr12	102249173	102249395	DRAM1	21711	75.1	47.36	4.96e-297
	chr12	102271220	102271442	DRAM1	115	18.1	18.98	3.87e-50
	chr12	102720224	102720446	PMCH	128610	9.03	14.23	1.28e-22
	chr12	103917635	103917857	LOC101929084	23716	328.9	518.7	0
	chr12	103973838	103974060	STAB2	7010	17.6	11.11	1.62e-37
	chr12	104597419	104597641	NFYB	65379	6.61	20.83	1.59e-19
	chr12	104979555	104979777	MIR3922	5635	12.3	9.72	2.95e-24
	chr12	105162812	105163034	SLC41A2	159439	10.8	11.34	3.08e-24
	chr12	105667453	105667675	APPL2	37445	8.15	12.85	3.17e-19
	chr12	106349229	106349451	NUAK1	184361	34.6	54.51	6.2e-145
	chr12	107065121	107065343	LOC100505978	13136	7.93	8.33	2.57e-14
	chr12	107774095	107774317	BTBD11	200318	42.9	33.85	1.33e-151
	chr12	107912896	107913118	BTBD11	61517	13	10.24	3.01e-26
	chr12	108747436	108747658	CMKLR1	32997	22.5	23.61	1.09e-68
	chr12	108877387	108877609	LOC102723562	9921	11.4	12.04	2.19e-26
	chr12	108956675	108956897	ISCU	381	12.1	19.1	7.5e-35
	chr12	109192218	109192440	SSH1	58920	17.6	11.11	1.62e-37
	chr12	109208684	109208906	SSH1	42454	5.06	15.97	3e-13
	chr12	109276025	109276247	DAO	2168	26.6	21.01	2.17e-78
	chr12	109343870	109344092	DAO	70013	57.5	90.62	1.15e-278
	chr12	109433480	109433702	SVOP	25344	15.9	99.99	1.77e-78
	chr12	109638030	109638252	ACACB	60828	38.5	60.76	4.52e-166
	chr12	110167335	110167557	FAM222A	15148	5.72	18.05	6.06e-17
	chr12	110215420	110215642	FAM222A-AS1	4128	9.47	9.95	4.29e-19
	chr12	110258843	110259065	MIR4497	12089	86.3	544.4	0
	chr12	110725899	110726121	ATP2A2	6867	7.49	23.61	1.48e-23
	chr12	110778699	110778921	ATP2A2	59667	107	84.37	0
	chr12	111080596	111080818	TCTN1	28764	10.8	17.01	8.35e-30
	chr12	111572598	111572820	CUX2	100770	63	39.72	8.68e-235
	chr12	112749174	112749396	HECTD4	70501	26.2	82.63	7.83e-124
	chr12	112927979	112928201	PTPN11	71443	10.6	16.67	1.42e-28
	chr12	113554198	113554420	RASAL1	19140	51.7	40.79	1.28e-195
	chr12	114278157	114278379	LINC01234	66669	61	48.09	2.08e-243
	chr12	114707045	114707267	TBX5	136702	88.5	139.57	0
	chr12	114770424	114770646	TBX5	73323	10.6	33.33	4.36e-38
	chr12	114986751	114986973	TBX3	134997	11.2	35.41	3.66e-41
	chr12	115218743	115218965	TBX3	96774	38.7	30.55	5.42e-132
	chr12	115767869	115768091	TBX3	645900	11	17.36	8.35e-30
	chr12	115912962	115913184	MIR620	673276	23.1	18.23	7.06e-63
	chr12	116841672	116841894	MIR4472-2	24230	31.9	11.19	3.86e-67
	chr12	116935125	116935347	LINC00173	35881	30.8	97.21	3.86e-153
	chr12	117691954	117692176	NOS1	50682	9.03	56.94	7.41e-39
	chr12	118294904	118295126	KSR2	110903	35.7	28.12	2.59e-117
	chr12	118656280	118656502	PEBP1	82410	12.8	20.14	1.92e-37
	chr12	118963084	118963306	SUDS3	148726	7.93	8.33	2.57e-14
	chr12	119553907	119554129	HSPB8	62467	6.61	20.83	1.59e-19
	chr12	119807804	119808026	CCDC60	35287	151.7	478.43	0
	chr12	119825885	119826107	CCDC60	53368	97.8	154.15	0
	chr12	120105725	120105947	PRKAB1	0	17.6	27.78	3.98e-58
	chr12	120884027	120884249	TRIAP1	0	203.9	64.3	0
	chr12	120884027	120884249	GATC	0	203.9	64.3	0
	chr12	121363757	121363979	SPPL3	21602	24.9	15.69	2.1e-63
	chr12	121622263	121622485	P2RX4	25180	5.28	16.67	1.87e-14
	chr12	122335903	122336125	PSMD9	9266	8.15	25.69	2.47e-26
	chr12	122479721	122479943	BCL7A	19860	30.8	32.4	1.02e-107
	chr12	122581324	122581546	MLXIP	64690	13.4	84.71	9.82e-65
	chr12	123411759	123411981	VPS37B	31047	11.2	70.83	1.71e-51
	chr12	123431387	123431609	ABCB9	19448	165.3	104.3	0
	chr12	123453210	123453432	ABCB9	2154	9.25	58.33	1.28e-40
	chr12	124052124	124052346	LOC101927415	16529	138.7	109.37	0
	chr12	124627193	124627415	FAM101A	146296	8.81	13.89	1.8e-21
	chr12	124758232	124758454	FAM101A	15257	69.1	109.02	0
	chr12	124846181	124846403	MIR6880	24393	6.83	10.76	6.11e-15
	chr12	125073664	125073886	NCOR2	21654	22.7	35.76	3.86e-82
	chr12	125423185	125423407	MIR5188	23092	317.3	100.06	0
	chr12	125713015	125713237	TMEM132B	97926	7.27	11.46	5.53e-16
	chr12	127380806	127381028	LOC440117	21570	99.3	78.29	0
	chr12	127526507	127526729	LOC101927592	18214	6.38	10.07	6.44e-14
	chr12	127592314	127592536	LOC101927592	47372	26.2	82.63	7.83e-124
	chr12	131767455	131767677	LOC338797	64339	25.5	40.27	2.34e-96
	chr12	132114445	132114667	SFSWAP	80966	13.9	14.58	2.9e-34
	chr12	132130870	132131092	SFSWAP	64541	12.5	39.58	1.85e-47
	chr12	132168377	132168599	SFSWAP	27034	17.6	11.11	1.62e-37
	chr12	132205492	132205714	SFSWAP	9860	92.5	72.91	0
	chr12	132643528	132643750	NOC4L	14535	10.1	31.94	4.62e-35
	chr12	132934502	132934724	LOC101928416	28066	6.38	10.07	6.44e-14
	chr12	133122587	133122809	MIR6763	35775	6.38	20.14	1.59e-19
	chr13	20565804	20566026	ZMYM2	32994	28.8	30.32	3.02e-97
	chr13	20936894	20937116	MIR4499	70870	137.6	144.66	0
	chr13	21293288	21293510	IL17D	15806	6.38	20.14	1.59e-19
	chr13	21525829	21526051	LINC00367	2262	17.4	54.86	1.62e-72
	chr13	21807377	21807599	SKA3	56636	58.8	37.08	3.42e-214
	chr13	22125109	22125331	MICU2	53025	7.05	11.11	5.53e-16
	chr13	22212897	22213119	FGF9	32097	14.5	15.28	1.32e-36
	chr13	22262288	22262510	FGF9	17073	11.4	36.11	1.02e-42
	chr13	23383201	23383423	BASP1P1	88898	7.49	47.22	2.8e-30
	chr13	23899499	23899721	SACS	49962	50.4	26.5	4.65e-162
	chr13	23973506	23973728	SACS-AS1	19383	161.2	101.66	0
	chr13	24362973	24363195	C1QTNF9B-AS1	99834	20	31.59	6.5e-70
	chr13	25122306	25122528	TPTE2P6	31819	28	11.02	5.89e-59
	chr13	25223723	25223945	ATP12A	30605	31.5	19.86	1.2e-89
	chr13	25449173	25449395	CENPJ	47633	27.5	43.4	4.42e-106
	chr13	25796419	25796641	LOC102723318	40949	14.1	8.89	1.62e-26
	chr13	26062490	26062712	ATP8A2	116281	11.4	9.03	2.61e-22
	chr13	27381113	27381335	GPR12	46191	12.1	38.19	7.22e-46
	chr13	27488997	27489219	GPR12	154075	95.6	150.68	0
	chr13	27909635	27909857	RASL11A	65171	47.6	149.99	9.72e-262
	chr13	28000066	28000288	GTF3A	1385	5.5	17.36	1.09e-15
	chr13	28345164	28345386	GSX1	21395	7.27	11.46	5.53e-16
	chr13	31185343	31185565	USPL1	6266	11.4	18.05	2.64e-32
	chr13	31845162	31845384	B3GALTL	71050	8.37	8.8	3.53e-16
	chr13	31976360	31976582	B3GALTL	202248	5.94	18.75	6.06e-17
	chr13	32739929	32740151	FRY-AS1	134153	81.7	128.81	0
	chr13	32763320	32763542	ZAR1L	122550	6.61	20.83	1.59e-19
	chr13	34140999	34141221	RFC3	250986	11.7	36.8	1.02e-42
	chr13	34515070	34515292	RFC3	122864	69.1	54.51	6.98e-288
	chr13	34622895	34623117	RFC3	230689	13	20.48	1.92e-37
	chr13	34767960	34768182	RFC3	375754	48.9	51.38	4.92e-200
	chr13	35389770	35389992	NBEA	126433	6.16	38.89	9.51e-24
	chr13	35934356	35934578	MAB21L1	116255	4.84	15.28	3e-13
	chr13	36173529	36173751	MAB21L1	122697	15.6	9.86	2.19e-31
	chr13	38489219	38489441	TRPC4	45280	14.8	93.05	1.57e-72
	chr13	38920925	38921147	UFM1	2762	20	15.8	8.38e-52
	chr13	39495271	39495493	STOML3	69504	19.6	15.45	2.05e-49
	chr13	40086946	40087168	LHFP	90189	17.6	18.52	7.23e-49
	chr13	40301739	40301961	MIR4305	63467	6.61	10.42	6.44e-14
	chr13	40807851	40808073	LINC00548	13212	17.8	28.12	1.42e-59
	chr13	40826448	40826670	LINC00548	31809	6.16	19.44	3.18e-18
	chr13	40907466	40907688	LINC00548	112827	38.3	24.16	7.9e-118
	chr13	40959713	40959935	LINC00598	95209	46.5	73.26	1.04e-211
	chr13	41369511	41369733	SLC25A15	5964	5.06	31.94	1.42e-17
	chr13	41719713	41719935	LOC101929140	12649	43.8	19.74	5.83e-124
	chr13	41976725	41976947	OR7E37P	39754	103	81.24	0
	chr13	42377227	42377449	VWA8	157773	81.7	257.62	0
	chr13	43577222	43577444	EPSTI1	10815	14.1	14.81	1.98e-35
	chr13	44716222	44716444	SMIM2-AS1	21	22.9	36.11	1.07e-83
	chr13	45710959	45711181	GTF2F2	16328	31.3	32.87	3.12e-109
	chr13	46347436	46347658	SPERT	70832	67.4	42.5	2.21e-257
	chr13	46385985	46386207	SIAH3	39640	9.03	28.47	1.25e-30
	chr13	47189792	47190014	LRCH1	62496	32.8	25.87	1.98e-104
	chr13	48134849	48135071	SUCLA2	440392	5.06	31.94	1.42e-17
	chr13	48205929	48206151	SUCLA2	369312	10.6	33.33	4.36e-38
	chr13	48640777	48640999	MED4-AS1	10275	290.4	183.18	0
	chr13	48646487	48646709	MED4-AS1	4565	129.5	204.15	0
	chr13	48705681	48705903	MED4	36404	35.4	12.42	6.34e-79
	chr13	48730679	48730901	MED4	61402	47.1	49.53	8.17e-190
	chr13	49193298	49193520	LINC00462	38261	26	81.94	6.42e-122
	chr13	50787812	50788034	ST13P4	41658	78.6	82.63	0
	chr13	50997980	50998202	ST13P4	251826	17.2	54.16	1.62e-72
	chr13	51033673	51033895	ST13P4	287519	20	15.8	8.38e-52
	chr13	51103546	51103768	DLEU7-AS1	278224	250.8	395.45	0
	chr13	51305642	51305864	DLEU7-AS1	76128	46.7	147.21	2.14e-257
	chr13	52171049	52171271	WDFY2	12565	62.5	65.73	4.97e-276
	chr13	52600779	52601001	UTP14C	1952	21.6	68.05	1.51e-97
	chr13	52989156	52989378	THSD1	8527	10.3	8.16	1.46e-18
	chr13	53168919	53169141	HNRNPA1L2	22465	4.4	27.78	1.19e-14
	chr13	59564559	59564781	LOC101926897	824598	9.03	14.23	1.28e-22
	chr13	62208645	62208867	PCDH20	218990	45.4	286.09	1.41e-291
	chr13	62953061	62953283	LINC00358	349380	10.3	65.27	5.37e-46
	chr13	65838284	65838506	LINC00395	1526133	26.4	166.65	1.59e-150
	chr13	67951722	67951944	PCDH9	147254	30.8	97.21	3.86e-153
	chr13	68872241	68872463	LINC00550	586995	6.16	38.89	9.51e-24
	chr13	69684017	69684239	LINC00550	224560	21.6	68.05	1.51e-97
	chr13	70562005	70562227	ATXN8OS	119119	21.8	13.75	9.92e-52
	chr13	71385844	71386066	LINC00348	203208	22.2	140.27	4.29e-122
	chr13	72058364	72058586	DACH1	382745	7.71	24.3	6.18e-25
	chr13	72671788	72672010	DACH1	230458	61	48.09	2.08e-243
	chr13	73328292	73328514	MZT1	26354	40.1	63.19	4.93e-175
	chr13	73607998	73608220	KLF5	24711	22.2	23.38	1.09e-68
	chr13	74003908	74004130	LINC00392	134252	23.1	18.23	7.06e-63
	chr13	74087972	74088194	LINC00392	50188	186	586.75	0
	chr13	74177893	74178115	LINC00392	39512	23.3	12.27	3.85e-52
	chr13	75789117	75789339	CTAGE11P	25179	20	126.38	3.32e-107
	chr13	76143679	76143901	UCHL3	20063	8.37	13.19	2.43e-20
	chr13	76146027	76146249	UCHL3	22411	116.5	91.83	0
	chr13	76627429	76627651	LMO7DN	182255	7.27	22.91	3.42e-22
	chr13	76738663	76738885	LMO7DN	293489	5.94	37.5	3.61e-22
	chr13	77096260	77096482	KCTD12	364059	61.9	97.56	2.65e-306
	chr13	79084303	79084525	POU4F1	93171	6.61	41.66	2.38e-25
	chr13	80214874	80215096	NDFIP2-AS1	159508	22.5	70.83	3.12e-101
	chr13	80366925	80367147	LINC00382	79575	7.05	11.11	5.53e-16
	chr13	80847609	80847831	SPRY2	67256	5.28	16.67	1.87e-14
	chr13	81444353	81444575	SPRY2	529267	16.5	17.36	4.23e-45
	chr13	84515884	84516106	SLITRK1	59356	133.6	46.83	0
	chr13	85682571	85682793	LINC00351	254946	13.2	20.83	9.34e-39
	chr13	87236019	87236241	SLITRK6	862536	15	47.22	1.45e-60
	chr13	88982874	88983096	LINC00433	209989	29.5	93.05	3.21e-145
	chr13	91003231	91003453	MIR622	119795	13.7	86.1	1.14e-66
	chr13	91244243	91244465	LINC01049	98701	40.3	42.36	6.65e-155
	chr13	94997680	94997902	DCT	134035	34.8	109.71	2.57e-177
	chr13	95201860	95202082	TGDS	46430	6.38	10.07	6.44e-14
	chr13	95585572	95585794	LOC101927284	172377	14.8	46.52	6.83e-59
	chr13	96400821	96401043	DNAJC3	71428	17.2	13.54	2.78e-41
	chr13	96812049	96812271	HS6ST3	68956	9.03	28.47	1.25e-30
	chr13	99311959	99312181	SLC15A1	92749	21.4	13.47	1.35e-50
	chr13	99486906	99487128	DOCK9-AS1	2568	38.5	60.76	4.52e-166
	chr13	99878703	99878925	UBAC2-AS1	25694	16.7	13.19	4.98e-39
	chr13	100225885	100226107	CLYBL	32812	7.05	22.22	3.42e-22
	chr13	100702709	100702931	PCCA	38339	110.1	69.44	0
	chr13	100737151	100737373	PCCA	3897	9.69	61.11	2.13e-42
	chr13	100911183	100911405	PCCA	169914	8.81	9.26	3.9e-17
	chr13	101451340	101451562	NALCN-AS1	90761	26.9	169.43	9.46e-153
	chr13	103339965	103340187	METTL21C	6685	38.1	240.26	6.82e-236
	chr13	103699099	103699321	SLC10A2	19876	6.38	20.14	1.59e-19
	chr13	104200357	104200579	MIR548AS	265509	29.3	92.35	2.99e-143
	chr13	104355133	104355355	MIR548AS	420285	13.7	86.1	1.14e-66
	chr13	104657024	104657246	MIR548AS	722176	40.5	31.94	1.82e-139
	chr13	107629181	107629403	LINC00443	322953	10.6	66.66	8.13e-48
	chr13	109356203	109356425	MYO16	74632	13.2	41.66	1.13e-50
	chr13	109406445	109406667	MYO16	124874	23.3	18.4	3.86e-64
	chr13	109624970	109625192	MYO16-AS1	194460	19.6	12.36	6.26e-44
	chr13	110775319	110775541	COL4A1	183956	74.6	235.4	0
	chr13	111604715	111604937	ANKRD10	37261	64.7	51.04	9.31e-264
	chr13	112592424	112592646	LINC00403	33979	7.49	23.61	1.48e-23
	chr13	112766306	112766528	SOX1	44393	17.8	56.24	5.27e-76
	chr13	112844309	112844531	LINC01070	7117	47.6	50	1.64e-191
	chr13	113164471	113164693	TUBGCP3	77807	8.37	13.19	2.43e-20
	chr13	113959558	113959780	LAMP1	8089	13	13.66	8e-31
	chr13	114540303	114540525	GAS6-AS1	21720	196.8	124.16	0
	chr13	114907104	114907326	RASA3	9009	16.3	25.69	2.04e-52
	chr13	115109592	115109814	CHAMP1	29627	203.9	160.75	0
	chr14	20869313	20869535	TEP1	12045	12.5	13.19	1.07e-29
	chr14	21077673	21077895	RNASE12	18691	10.8	11.34	3.08e-24
	chr14	21220186	21220408	EDDM3A	6087	209.8	165.44	0
	chr14	21288572	21288794	RNASE1	17536	62.1	195.82	0
	chr14	21441451	21441673	METTL17	16293	9.03	9.49	4.16e-18
	chr14	21510250	21510472	RNASE7	0	18.1	18.98	3.87e-50
	chr14	21565419	21565641	TMEM253	1456	29.7	187.48	5.29e-173
	chr14	21600079	21600301	OR5AU1	23884	6.61	10.42	6.44e-14
	chr14	21998789	21999011	SALL2	6340	5.06	15.97	3e-13
	chr14	23005974	23006196	DAD1	51948	102.8	64.86	0
	chr14	23308482	23308704	MMP14	2740	9.47	14.93	8.8e-24
	chr14	23451880	23452102	AJUBA	29	9.47	9.95	4.29e-19
	chr14	24101091	24101313	DHRS2	4261	50.6	26.62	4.65e-162
	chr14	24139794	24140016	DHRS2	34221	100.2	157.97	0
	chr14	24865543	24865765	NYNRIN	2228	7.27	11.46	5.53e-16
	chr14	25011468	25011690	CTSG	33777	12.5	19.79	3.84e-36
	chr14	26927123	26927345	NOVA1	139616	4.84	15.28	3e-13
	chr14	30722263	30722485	G2E3	305845	8.15	25.69	2.47e-26
	chr14	31931676	31931898	DTD2	4996	19.4	12.22	6.26e-44
	chr14	32490189	32490411	ARHGAP5-AS1	55495	74.6	78.47	0
	chr14	32555274	32555496	ARHGAP5	8779	24.2	25.46	5.01e-77
	chr14	32593811	32594033	ARHGAP5	47316	8.81	13.89	1.8e-21
	chr14	32814594	32814816	AKAP6	16115	296.6	233.83	0
	chr14	33029371	33029593	AKAP6	230892	7.93	50	5.83e-32
	chr14	34504966	34505188	EGLN3	84682	6.83	10.76	6.11e-15
	chr14	34767038	34767260	SPTSSA	164209	223.9	235.4	0
	chr14	35155785	35156007	CFL2	28023	10.1	10.65	4.13e-21
	chr14	35214488	35214710	CFL2	30459	18.5	19.44	1.05e-52
	chr14	35310610	35310832	BAZ1A	34022	25.3	79.85	4.16e-118
	chr14	35312432	35312654	BAZ1A	32200	11.2	8.85	2.35e-21
	chr14	35683635	35683857	PSMA6	77667	69.4	27.34	5.49e-224
	chr14	35964459	35964681	INSM2	38568	14.8	15.51	8.57e-38
	chr14	36179492	36179714	RALGAPA1P	98637	37.6	59.37	9.76e-161
	chr14	36289295	36289517	BRMS1L	6081	11.7	12.27	2.19e-26
	chr14	37239611	37239833	PAX9	112838	16.3	12.85	6.49e-38
	chr14	37290179	37290401	MIR4503	131196	44.9	35.41	7.72e-161
	chr14	37950098	37950320	FOXA1	114006	61.9	65.04	2.13e-272
	chr14	38086120	38086342	FOXA1	21795	34.6	36.34	3.6e-126
	chr14	38189451	38189673	FOXA1	125126	16.1	12.67	8.28e-37
	chr14	39493009	39493231	SEC23A	79207	56.4	59.25	4.08e-240
	chr14	41607044	41607266	LOC644919	183128	28.2	44.44	2.31e-109
	chr14	43075266	43075488	LRFN5	998502	6.16	9.72	6.48e-13
	chr14	44114439	44114661	FSCB	861839	11.7	73.6	2.37e-53
	chr14	44577835	44578057	FSCB	398443	17.4	18.29	1.33e-47
	chr14	45550672	45550894	PRPF39	2409	8.59	13.54	1.8e-21
	chr14	45824881	45825103	MIS18BP1	102276	13.4	14.12	4.17e-33
	chr14	46184603	46184825	MIS18BP1	461998	12.1	38.19	7.22e-46
	chr14	46254621	46254843	MIS18BP1	532016	96	605.5	0
	chr14	46262387	46262609	MIS18BP1	539782	50.2	79.16	2.7e-234
	chr14	50417613	50417835	MIR6076	15283	16.1	10.14	2.18e-32
	chr14	51067003	51067225	ATL1	40260	185.4	83.52	0
	chr14	51590228	51590450	TRIM9	27806	27.1	42.7	1.9e-104
	chr14	51804205	51804427	LINC00640	4094	10.6	16.67	1.42e-28
	chr14	52011731	52011953	FRMD6-AS2	54718	18.5	19.44	1.05e-52
	chr14	52236071	52236293	GNG2	90730	28.4	17.92	6.98e-77
	chr14	53068656	53068878	GPR137C	48790	46.5	146.51	3.15e-255
	chr14	53650908	53651130	LOC101927620	30836	24	37.84	2.12e-88
	chr14	54021364	54021586	MIR5580	393617	44.7	23.49	1.68e-135
	chr14	54084334	54084556	MIR5580	330647	6.38	10.07	6.44e-14
	chr14	55679485	55679707	DLGAP5	21089	16.1	25.34	5.21e-51
	chr14	56515366	56515588	PELI2	69506	5.06	31.94	1.42e-17
	chr14	57133077	57133299	TMEM260	86566	178.1	93.63	0
	chr14	57743058	57743280	EXOC5	7441	38.7	61.11	7.41e-168
	chr14	58004139	58004361	C14orf105	43558	16.7	52.77	4.65e-69
	chr14	58532835	58533057	C14orf37	85791	8.81	13.89	1.8e-21
	chr14	58754950	58755172	FLJ31306	9684	13	8.19	8.55e-23
	chr14	58876823	58877045	TOMM20L	14179	39.2	20.6	1.11e-112
	chr14	58885394	58885616	KIAA0586	8488	18.5	8.33	4.56e-33
	chr14	60154422	60154644	CCDC175	110873	14.1	22.22	9.37e-43
	chr14	61345918	61346140	TRMT5	101658	48.9	30.83	9.87e-167
	chr14	61592561	61592783	SLC38A6	144729	28	88.19	2.01e-135
	chr14	61990543	61990765	LOC101927780	46148	43.6	34.37	1.14e-154
	chr14	62431788	62432010	SYT16	30532	30.2	13.59	1.83e-71
	chr14	64032187	64032409	PPP2R5E	57231	8.81	27.78	3.5e-29
	chr14	64240321	64240543	SGPP1	45565	135.8	85.69	0
	chr14	64527266	64527488	SYNE2	155185	20	15.8	8.38e-52
	chr14	65472274	65472496	FNTB	18767	79.9	84.02	0
	chr14	65514391	65514613	MIR4706	2985	4.84	15.28	3e-13
	chr14	66480919	66481141	LINC00238	471949	8.59	13.54	1.8e-21
	chr14	66482286	66482508	LINC00238	470582	16.1	25.34	5.21e-51
	chr14	66571255	66571477	LINC00238	381613	78.2	493.01	0
	chr14	66970311	66970533	GPHN	3593	48.4	21.82	2.08e-142
	chr14	67399420	67399642	FAM71D	256469	265.7	167.62	0
	chr14	67652909	67653131	FAM71D	2980	17.2	9.03	1.26e-32
	chr14	67944779	67945001	TMEM229B	37021	29.9	47.22	2.52e-119
	chr14	68327545	68327767	RAD51B	41049	7.71	12.15	3.98e-18
	chr14	69454987	69455209	ACTN1-AS1	8588	135.2	142.12	0
	chr14	69535176	69535398	DCAF5	84517	14.3	90.27	1.44e-70
	chr14	69573160	69573382	DCAF5	46533	10.8	17.01	8.35e-30
	chr14	69818215	69818437	ERH	46585	7.49	47.22	2.8e-30
	chr14	69894411	69894633	SLC39A9	29315	61.6	48.61	8.87e-247
	chr14	70079573	70079795	KIAA0247	1263	17	26.73	2.96e-55
	chr14	70179916	70180138	SRSF5	53697	43.6	27.5	8e-142
	chr14	70477906	70478128	SLC8A3	68807	101.1	106.24	0
	chr14	70899089	70899311	SYNJ2BP-COX16	15282	5.72	18.05	6.06e-17
	chr14	70899089	70899311	SYNJ2BP	15282	5.72	18.05	6.06e-17
	chr14	70914002	70914224	ADAM21	4651	37.2	39.12	8.56e-139
	chr14	71331824	71332046	PCNX	42077	107.4	42.36	0
	chr14	71339254	71339476	PCNX	34647	13.4	10.59	2.78e-28
	chr14	71543291	71543513	PCNX	169169	104.4	36.57	0
	chr14	72030708	72030930	SIPA1L1	22069	22.9	36.11	1.07e-83
	chr14	72142765	72142987	SIPA1L1	89767	4.84	15.28	3e-13
	chr14	72240777	72240999	RGS6	157819	152.6	80.2	0
	chr14	72252933	72253155	RGS6	145663	38.5	121.52	4.58e-202
	chr14	72441618	72441840	RGS6	42801	20	31.59	6.5e-70
	chr14	74339759	74339981	ZNF410	13338	28.8	30.32	3.02e-97
	chr14	74471730	74471952	ENTPD5	14075	24	37.84	2.12e-88
	chr14	75129560	75129782	AREL1	50026	6.38	10.07	6.44e-14
	chr14	75419793	75420015	PGF	2453	44.3	139.57	3.85e-240
	chr14	76144169	76144391	TTLL5	16618	7.05	22.22	3.42e-22
	chr14	76417870	76418092	TGFB3	30001	6.38	20.14	1.59e-19
	chr14	76860194	76860416	ESRRB	22504	26.6	168.04	9.46e-153
	chr14	77385085	77385307	LRRC74	92360	11.4	12.04	2.19e-26
	chr14	77404547	77404769	IRF2BPL	90274	13	8.19	8.55e-23
	chr14	77405844	77406066	IRF2BPL	88977	13	81.94	6.76e-61
	chr14	77425681	77425903	IRF2BPL	69140	53.5	33.75	7.35e-188
	chr14	77489352	77489574	IRF2BPL	5469	6.38	40.27	2.38e-25
	chr14	78601821	78602043	NRXN3	34674	4.84	15.28	3e-13
	chr14	79507090	79507312	NRXN3	870374	11	69.44	1.2e-49
	chr14	79626040	79626262	NRXN3	989324	30.8	32.4	1.02e-107
	chr14	81765371	81765593	GTF2A1	77796	17.2	13.54	2.78e-41
	chr14	81838188	81838410	STON2	55147	12.8	20.14	1.92e-37
	chr14	89083526	89083748	ZC3H14	54273	20.3	63.88	1.88e-88
	chr14	89692599	89692821	FOXN3	190634	9.91	15.62	3.77e-26
	chr14	89895226	89895448	FOXN3-AS1	11528	126.4	132.86	0
	chr14	90776883	90777105	NRDE2	21377	14.3	22.57	4.16e-44
	chr14	91035987	91036209	LOC101928909	72765	8.15	12.85	3.17e-19
	chr14	91100265	91100487	LOC101928909	8487	13.4	42.36	2.68e-52
	chr14	91337398	91337620	TTC7B	54637	26.6	21.01	2.17e-78
	chr14	91350143	91350365	TTC7B	67382	20.5	21.53	1.41e-60
	chr14	91975759	91975981	SMEK1	844	95.8	151.03	0
	chr14	92569805	92570027	ATXN3	2939	84.8	133.67	0
	chr14	92642917	92643139	CPSF2	54619	16.3	25.69	2.04e-52
	chr14	93064927	93065149	RIN3	84802	9.25	14.58	8.8e-24
	chr14	93102890	93103112	LGMN	111936	18.5	8.33	4.56e-33
	chr14	93602364	93602586	ITPK1	20101	4.84	30.55	1.42e-17
	chr14	94786642	94786864	SERPINA6	2825	17	10.69	1.93e-35
	chr14	94801277	94801499	SERPINA6	11589	19.4	20.37	1.31e-56
	chr14	94911951	94912173	SERPINA11	6950	18.1	28.47	1.42e-59
	chr14	96946760	96946982	PAPOLA	21732	16.1	12.67	8.28e-37
	chr14	97287901	97288123	VRK1	24217	17.2	13.54	2.78e-41
	chr14	97782107	97782329	LOC101929241	142825	14.5	9.17	1.8e-27
	chr14	97798377	97798599	LOC101929241	126555	11.9	12.5	1.77e-27
	chr14	98543583	98543805	C14orf64	99122	32.6	102.77	3.86e-163
	chr14	98700144	98700366	C14orf64	255683	6.61	20.83	1.59e-19
	chr14	99380227	99380449	C14orf177	202277	5.72	18.05	6.06e-17
	chr14	99799458	99799680	BCL11B	61408	39.9	62.84	3.11e-173
	chr14	99950538	99950760	CCNK	2799	34.3	216.65	1.41e-207
	chr14	100786856	100787078	SLC25A47	2602	13.9	87.49	1.14e-66
	chr14	100864482	100864704	WDR25	21727	39.2	61.8	1.2e-169
	chr14	100919720	100919942	WDR25	76965	9.03	14.23	1.28e-22
	chr14	101159701	101159923	DLK1	33280	19.6	10.3	1.59e-39
	chr14	102307134	102307356	PPP2R5C	30994	6.16	9.72	6.48e-13
	chr14	102657094	102657316	WDR20	50905	39.2	30.9	1.76e-133
	chr14	103453676	103453898	AMN	64683	53.3	56.01	2.88e-224
	chr14	103710466	103710688	LINC00605	55101	196	206	0
	chr14	103824314	103824536	SNORA28	20128	52	327.75	0
	chr14	104901338	104901560	C14orf180	144462	11.4	18.05	2.64e-32
	chr14	105449146	105449368	C14orf79	3249	19.4	30.55	6.35e-67
	chr14	105820663	105820885	BRF1	38749	17.6	13.89	2.02e-42
	chr14	106034559	106034781	TMEM121	41606	18.3	28.82	4.98e-61
	chr14	106154167	106154389	ELK2AP	15023	18.7	19.67	5.34e-54
	chr15	21892554	21892776	LOC646214	47964	6.16	9.72	6.48e-13
	chr15	21926049	21926271	LOC646214	14469	9.03	56.94	7.41e-39
	chr15	22696787	22697009	GOLGA8DP	18720	4.18	26.39	1.19e-14
	chr15	22921352	22921574	CYFIP1	34182	17.6	55.55	2.95e-74
	chr15	22941974	22942196	CYFIP1	13560	7.05	11.11	5.53e-16
	chr15	23051494	23051716	NIPA2	17067	6.16	19.44	3.18e-18
	chr15	23667294	23667516	GOLGA8S	67399	29.1	30.55	9.97e-99
	chr15	25103943	25104165	SNURF	95906	13.4	84.71	9.82e-65
	chr15	29387032	29387254	APBA2	173192	14.8	46.52	6.83e-59
	chr15	29894811	29895033	FAM189A1	31884	23.8	25	3.18e-74
	chr15	29983292	29983514	FAM189A1	120365	48	37.84	1.78e-176
	chr15	30038601	30038823	TJP1	75884	57.2	22.57	6.29e-171
	chr15	30222904	30223126	TJP1	108198	8.37	52.77	2.24e-35
	chr15	31302306	31302528	MTMR10	18499	12.8	10.07	3.01e-26
	chr15	31442958	31443180	TRPM1	49029	119.6	75.41	0
	chr15	31489637	31489859	LOC283710	33192	15.4	12.15	1.27e-34
	chr15	31519611	31519833	LOC283710	3218	4.62	29.16	4.25e-16
	chr15	31676809	31677031	KLF13	57726	58.6	61.57	1.4e-252
	chr15	31717786	31718008	KLF13	98703	11	11.57	3.08e-24
	chr15	31758029	31758251	KLF13	138946	6.16	9.72	6.48e-13
	chr15	33437832	33438054	FMN1	77599	112.9	118.74	0
	chr15	33779553	33779775	RYR3	176376	8.15	12.85	3.17e-19
	chr15	34974952	34975174	GJD2	71609	9.03	9.49	4.16e-18
	chr15	35024710	35024932	GJD2	21851	109.2	344.41	0
	chr15	35548776	35548998	ANP32AP1	19249	39.6	41.66	4.93e-150
	chr15	35727545	35727767	MIR3942	62980	14.8	15.51	8.57e-38
	chr15	35732774	35732996	MIR3942	68209	14.3	15.04	1.32e-36
	chr15	35800540	35800762	DPH6-AS1	37635	66.9	70.36	1.06e-301
	chr15	35849769	35849991	DPH6	11365	7.49	11.8	4.79e-17
	chr15	36160919	36161141	MIR4510	57917	16.5	26.04	7.85e-54
	chr15	36298077	36298299	MIR4510	79020	11.7	36.8	1.02e-42
	chr15	36807739	36807961	C15orf41	63844	23.3	36.8	2.94e-85
	chr15	39848788	39849010	THBS1	24271	6.83	43.05	5.66e-27
	chr15	40294671	40294893	SRP14	36497	30.4	47.91	5.3e-121
	chr15	40760789	40761011	CHST14	2150	11.7	9.2	2.61e-22
	chr15	40804717	40804939	MRPL42P5	19811	8.59	9.03	3.9e-17
	chr15	40958615	40958837	RAD51-AS1	28467	12.3	19.44	7.5e-35
	chr15	41329467	41329689	INO80	78756	40.1	42.13	2.82e-153
	chr15	41604088	41604310	OIP5	20510	9.69	15.28	5.86e-25
	chr15	41703562	41703784	RTF1	5519	19.2	20.14	2.67e-55
	chr15	41986375	41986597	MIR626	2592	11.7	9.2	2.61e-22
	chr15	42083163	42083385	MAPKBP1	16531	11.7	9.2	2.61e-22
	chr15	42323519	42323741	PLA2G4E	19161	8.37	8.8	3.53e-16
	chr15	42963750	42963972	CDAN1	65446	84.3	132.97	0
	chr15	44205662	44205884	PIN4P1	35293	7.93	12.5	3.98e-18
	chr15	44550283	44550505	CASC4	30405	11.7	12.27	2.19e-26
	chr15	44937903	44938125	SPG11	17752	146.9	115.79	0
	chr15	45174770	45174992	C15orf43	73909	5.72	18.05	6.06e-17
	chr15	45399803	45400025	DUOX2	6335	20.5	129.16	2.59e-109
	chr15	49052133	49052355	CEP152	50989	35	18.4	6.52e-96
	chr15	49558268	49558490	MIR4716	96918	34.6	36.34	3.6e-126
	chr15	49798652	49798874	FGF7	83277	26.4	16.67	1.88e-69
	chr15	49917938	49918160	DTWD1	4712	183.2	96.29	0
	chr15	49981712	49981934	DTWD1	68486	15.2	47.91	1.45e-60
	chr15	50455258	50455480	SLC27A2	18914	7.71	24.3	6.18e-25
	chr15	50938451	50938673	TRPM7	40340	5.5	17.36	1.09e-15
	chr15	51090182	51090404	SPPL2A	32272	35.2	22.22	1.54e-105
	chr15	51372547	51372769	TNFAIP8L3	24705	41	18.45	2.02e-112
	chr15	51891946	51892168	DMXL2	22800	8.81	27.78	3.5e-29
	chr15	52156767	52156989	TMOD3	34942	181.6	95.48	0
	chr15	52297107	52297329	MAPK6	14083	6.16	9.72	6.48e-13
	chr15	52359878	52360100	BCL2L10	44873	16.3	8.56	8.76e-30
	chr15	52369280	52369502	BCL2L10	35471	20.9	8.25	2.32e-36
	chr15	52632905	52633127	MYO5C	44910	41.4	65.27	2.89e-182
	chr15	52850397	52850619	ARPP19	10595	62.3	39.3	1.35e-231
	chr15	52955865	52956087	FAM214A	14745	53.5	84.37	2.03e-253
	chr15	55334102	55334324	RSL24D1	154908	17	53.47	8.77e-71
	chr15	55522946	55523168	RSL24D1	33715	7.93	8.33	2.57e-14
	chr15	56497394	56497616	RFX7	37868	42.5	44.67	2.2e-166
	chr15	56532684	56532906	RFX7	2578	36.8	19.33	2.75e-102
	chr15	56661558	56661780	TEX9	3936	83.2	87.49	0
	chr15	56922666	56922888	ZNF280D	103397	71.1	74.76	0
	chr15	57191227	57191449	LOC145783	19249	83.4	87.72	0
	chr15	57359736	57359958	TCF12	148903	37.6	237.48	3.9e-231
	chr15	57442336	57442558	LINC00926	150006	9.25	29.16	4.3e-32
	chr15	57966853	57967075	POLR2M	31645	16.5	17.36	4.23e-45
	chr15	58326776	58326998	ALDH1A2	31124	9.69	15.28	5.86e-25
	chr15	58526709	58526931	AQP9	96301	5.5	17.36	1.09e-15
	chr15	59025936	59026158	ADAM10	16020	14.1	8.89	1.62e-26
	chr15	59104802	59105024	FAM63B	41409	25.1	15.83	1.33e-64
	chr15	59458013	59458235	MIR2116	5227	155.2	69.93	0
	chr15	59692323	59692545	MYO1E	27252	11.2	35.41	3.66e-41
	chr15	59863636	59863858	GCNT3	40125	24.2	38.19	5.57e-90
	chr15	59911692	59911914	GCNT3	7710	23.6	148.6	9.71e-131
	chr15	59950806	59951028	GTF2A2	1069	18.7	19.67	5.34e-54
	chr15	59989984	59990206	BNIP2	8342	21.4	16.84	1.16e-56
	chr15	60083629	60083851	BNIP2	101987	12.5	13.19	1.07e-29
	chr15	60351472	60351694	FOXB1	55051	44	69.44	6.92e-197
	chr15	60396491	60396713	FOXB1	100070	17.4	54.86	1.62e-72
	chr15	60609195	60609417	ANXA2	80769	94	98.83	0
	chr15	60685265	60685487	ANXA2	4699	12.8	10.07	3.01e-26
	chr15	61201156	61201378	LOC100996876	227388	34.8	12.19	9.58e-77
	chr15	62554865	62555087	MIR8067	41847	137.6	108.5	0
	chr15	63189514	63189736	MIR190A	73358	16.7	10.55	2.05e-34
	chr15	63449377	63449599	RPS27L	143	210.5	132.77	0
	chr15	63720614	63720836	LOC102723344	38185	39.9	25.14	8.76e-125
	chr15	64647178	64647400	CSNK1G1	1043	9.47	14.93	8.8e-24
	chr15	64900148	64900370	OAZ2	95093	20.3	21.29	3.02e-59
	chr15	65059339	65059561	MIR1272	4625	39.9	125.68	1.97e-210
	chr15	65078856	65079078	RBPMS2	11086	12.8	40.27	4.62e-49
	chr15	65195798	65196020	ANKDD1A	8082	6.83	10.76	6.11e-15
	chr15	65299205	65299427	SPG21	16921	12.3	9.72	2.95e-24
	chr15	65538727	65538949	CILP	34887	6.83	21.53	7.54e-21
	chr15	66089026	66089248	DENND4A	4395	10.6	8.33	1.76e-19
	chr15	66106180	66106402	DENND4A	21549	16.5	26.04	7.85e-54
	chr15	66655187	66655409	TIPIN	6133	9.25	14.58	8.8e-24
	chr15	66816348	66816570	ZWILCH	18927	32.1	33.79	8.41e-114
	chr15	67458668	67458890	IQCH	88249	25.8	27.08	3.95e-84
	chr15	68295694	68295916	PIAS1	50657	9.03	9.49	4.16e-18
	chr15	69977954	69978176	LOC145837	123895	5.28	16.67	1.87e-14
	chr15	70175548	70175770	LINC00593	47975	5.28	16.67	1.87e-14
	chr15	70687829	70688051	TLE3	297573	9.03	14.23	1.28e-22
	chr15	71083006	71083228	UACA	27156	7.71	12.15	3.98e-18
	chr15	71656513	71656735	LOC101929196	175115	54.6	86.1	3.84e-261
	chr15	71740094	71740316	LOC101929173	243563	15	11.8	1.53e-33
	chr15	71952792	71953014	LOC101929173	30865	13.2	10.42	2.93e-27
	chr15	72484534	72484756	GRAMD2	5381	30.8	32.4	1.02e-107
	chr15	72495703	72495925	GRAMD2	5567	6.16	9.72	6.48e-13
	chr15	72740150	72740372	ARIH1	26296	75.7	238.87	0
	chr15	73458178	73458400	NEO1	113353	142.9	450.65	0
	chr15	74437943	74438165	ISLR2	15947	72.9	45.97	2.37e-285
	chr15	74776534	74776756	UBL7-AS1	22928	20.3	127.77	3.32e-107
	chr15	75566769	75566991	GOLGA6D	8192	9.03	14.23	1.28e-22
	chr15	75602061	75602283	COMMD4	26055	13.7	43.05	6.23e-54
	chr15	75785838	75786060	SIN3A	37714	5.5	17.36	1.09e-15
	chr15	75959054	75959276	SNX33	17706	9.25	9.72	4.29e-19
	chr15	75986425	75986647	CSPG4	18543	6.16	38.89	9.51e-24
	chr15	76196305	76196527	FBXO22	105	27.5	21.7	4.74e-81
	chr15	76555268	76555490	TYRO3P	2775	24.7	15.55	3.28e-62
	chr15	77605034	77605256	LINC00597	87288	31.7	20	1.2e-89
	chr15	77797985	77798207	HMG20A	84742	19.2	10.07	1.61e-38
	chr15	78439472	78439694	IDH3A	2026	22	69.44	2.18e-99
	chr15	79003975	79004197	LOC646938	40183	13	13.66	8e-31
	chr15	80295578	80295800	BCL2A1	31935	365	164.47	0
	chr15	80460815	80461037	FAH	15582	74.2	58.5	6.26e-316
	chr15	80533761	80533983	LINC01314	10621	19.8	31.25	2.05e-68
	chr15	80777811	80778033	LOC101929586	77253	44.7	23.49	1.68e-135
	chr15	81596400	81596622	IL16	7146	19.4	61.11	7.37e-85
	chr15	81725435	81725657	TMC3	59017	37.6	29.68	4.47e-126
	chr15	82172783	82173005	MEX3B	165480	7.71	24.3	6.18e-25
	chr15	82314452	82314674	MEX3B	23811	55.9	176.37	1.87e-321
	chr15	83410920	83411142	LOC283693	2388	53.1	83.67	1.7e-251
	chr15	84049410	84049632	SH3GL3	66460	50.4	22.72	7.6e-152
	chr15	85265902	85266124	SEC11A	6211	15.9	25	1.3e-49
	chr15	85433451	85433673	SLC28A1	5559	49.5	78.12	1.68e-230
	chr15	86160490	86160712	AKAP13	2470	20.7	130.54	1.99e-111
	chr15	86214430	86214652	AKAP13	51249	9.03	9.49	4.16e-18
	chr15	86297166	86297388	LOC101929679	4569	7.71	24.3	6.18e-25
	chr15	86307273	86307495	LOC101929679	5317	5.94	18.75	6.06e-17
	chr15	88831345	88831567	NTRK3	31383	9.69	15.28	5.86e-25
	chr15	89164424	89164646	AEN	0	124.4	98.08	0
	chr15	89247561	89247783	ISG20	65522	12.8	20.14	1.92e-37
	chr15	89432609	89432831	HAPLN3	5940	5.94	37.5	3.61e-22
	chr15	89456913	89457135	MFGE8	250	6.16	19.44	3.18e-18
	chr15	89954801	89955023	LINC00925	33528	44.9	28.33	1.32e-147
	chr15	90056556	90056778	LINC00928	10488	23.8	15	1.16e-58
	chr15	91032874	91033096	CRTC3	40023	19.8	62.49	1.19e-86
	chr15	92410221	92410443	SLCO3A1	13283	9.25	9.72	4.29e-19
	chr15	92691163	92691385	ST8SIA2	245756	4.4	27.78	1.19e-14
	chr15	93166665	93166887	FAM174B	32145	7.49	11.8	4.79e-17
	chr15	93345545	93345767	ASB9P1	6831	160.7	168.97	0
	chr15	93355554	93355776	ASB9P1	16840	7.93	8.33	2.57e-14
	chr15	93493230	93493452	MIR3175	45601	197.3	88.88	0
	chr15	95770161	95770383	LINC01197	99947	13.9	8.75	1.43e-25
	chr15	96232710	96232932	LINC00924	256388	33.2	34.95	2.08e-118
	chr15	98264084	98264306	LINC00923	153354	14.8	93.05	1.57e-72
	chr15	99099265	99099487	FAM169B	41654	5.5	17.36	1.09e-15
	chr15	99161782	99162004	IGF1R	29765	12.1	76.38	4.22e-57
	chr15	99718001	99718223	SYNM	72715	14.5	9.17	1.8e-27
	chr15	99804455	99804677	HSP90B2P	6725	49.3	31.11	3.18e-168
	chr15	99810839	99811061	HSP90B2P	13109	39.4	62.15	1.94e-171
	chr15	100508034	100508256	DNM1P46	160902	32.4	34.02	2.47e-115
	chr15	101125728	101125950	LINS	16496	13.2	13.89	5.85e-32
	chr15	101202575	101202797	ASB7	59820	43.2	27.22	2.19e-140
	chr15	101417750	101417972	ALDH1A3	2038	103.9	163.87	0
	chr15	101675331	101675553	CHSY1	116585	16.1	25.34	5.21e-51
	chr16	1571626	1571848	TMEM204	11811	15.9	99.99	1.77e-78
	chr16	1751542	1751764	MAPK8IP3	4458	15.2	11.98	1.53e-33
	chr16	1884144	1884366	FAHD1	6919	4.62	29.16	4.25e-16
	chr16	1960472	1960694	HS3ST6	7538	28.8	22.74	1.98e-86
	chr16	2583298	2583520	MIR3178	1292	26	27.31	3.95e-84
	chr16	2773092	2773314	PRSS27	2540	9.03	14.23	1.28e-22
	chr16	2790172	2790394	SRRM2	11937	21.6	68.05	1.51e-97
	chr16	3150376	3150598	ZSCAN10	1058	10.8	34.02	1.28e-39
	chr16	3788816	3789038	TRAP1	21218	6.38	10.07	6.44e-14
	chr16	3889412	3889634	CREBBP	40488	14.8	15.51	8.57e-38
	chr16	4190761	4190983	ADCY9	24575	255.8	100.86	0
	chr16	4225156	4225378	ADCY9	58970	12.8	8.05	8.55e-23
	chr16	4351780	4352002	LOC101926896	26340	42.3	266.64	3.75e-267
	chr16	4586689	4586911	CDIP1	1906	6.61	10.42	6.44e-14
	chr16	4637683	4637905	UBALD1	27023	7.49	11.8	4.79e-17
	chr16	4668977	4669199	UBALD1	4050	6.16	19.44	3.18e-18
	chr16	4675930	4676152	MGRN1	1105	27.5	14.47	9.16e-67
	chr16	4715167	4715389	MIR6769A	5931	7.49	11.8	4.79e-17
	chr16	4795709	4795931	ANKS3	11331	14.8	11.63	1.8e-32
	chr16	4947408	4947630	PPL	39507	33	208.31	2.9e-198
	chr16	4964086	4964308	PPL	22829	5.72	18.05	6.06e-17
	chr16	5286895	5287117	FAM86A	139074	7.71	24.3	6.18e-25
	chr16	5381436	5381658	FAM86A	233615	11.4	9.03	2.61e-22
	chr16	5455873	5456095	LOC101926950	210157	46.5	48.84	1.98e-186
	chr16	8884723	8884945	TMEM186	6561	8.37	26.39	9.47e-28
	chr16	9081070	9081292	USP7	50484	10.1	15.97	3.77e-26
	chr16	10463005	10463227	ATF7IP2	16686	19.2	15.1	3.13e-48
	chr16	10523246	10523468	ATF7IP2	43334	21.1	66.66	6.86e-94
	chr16	10630741	10630963	EMP2	43577	6.83	21.53	7.54e-21
	chr16	10688552	10688774	EMP2	14013	14.1	11.11	2.34e-30
	chr16	10928182	10928404	TVP23A	15561	67.2	42.36	9.39e-256
	chr16	11089465	11089687	CLEC16A	51120	4.84	15.28	3e-13
	chr16	11283810	11284032	SOCS1	66008	13.4	21.18	4.44e-40
	chr16	11399918	11400140	PRM1	24726	34.3	216.65	1.41e-207
	chr16	11591274	11591496	LOC101927131	32158	27.1	28.47	6.58e-90
	chr16	11656350	11656572	LITAF	24751	66.1	41.66	6.96e-251
	chr16	11659485	11659707	LITAF	21616	7.27	22.91	3.42e-22
	chr16	11770799	11771021	SNN	8510	5.94	18.75	6.06e-17
	chr16	11875614	11875836	ZC3H7A	15279	20.7	21.76	6.51e-62
	chr16	11974030	11974252	RSL1D1	28588	47.3	298.58	2.23e-306
	chr16	12632446	12632668	MIR4718	181511	21.4	16.84	1.16e-56
	chr16	13034075	13034297	SHISA9	38598	71.1	112.14	0
	chr16	13547245	13547467	ERCC4	466548	15.6	24.65	1.3e-49
	chr16	14494391	14494613	MIR365A	91249	39.2	24.72	5.44e-122
	chr16	15684827	15685049	MIR6506	19904	9.03	14.23	1.28e-22
	chr16	15738140	15738362	MIR484	989	26	11.71	4.88e-56
	chr16	16061356	16061578	ABCC1	17922	16.5	8.68	1.01e-30
	chr16	16105374	16105596	ABCC1	61940	43.8	23.03	9.08e-133
	chr16	16130288	16130510	ABCC1	86854	15.9	16.67	2.08e-41
	chr16	16162763	16162985	ABCC1	119329	21.6	34.02	1.66e-77
	chr16	16955620	16955842	NPIPA8	482518	28	17.64	1.24e-75
	chr16	17609329	17609551	XYLT1	44591	18.7	14.76	4.7e-47
	chr16	19232128	19232350	SYT17	52490	15	9.44	2.07e-29
	chr16	19278433	19278655	CLEC19A	18451	8.37	26.39	9.47e-28
	chr16	20195222	20195444	GPR139	110122	12.1	19.1	7.5e-35
	chr16	20877178	20877400	LYRM1	34158	267.5	281.22	0
	chr16	20979432	20979654	DCUN1D3	67871	7.93	12.5	3.98e-18
	chr16	21711017	21711239	OTOA	15267	6.61	41.66	2.38e-25
	chr16	22009931	22010153	PDZD9	2279	25.8	27.08	3.95e-84
	chr16	22076659	22076881	VWA3A	26979	16.3	10.28	2.13e-33
	chr16	22241714	22241936	EEF2K	24122	7.49	11.8	4.79e-17
	chr16	22855317	22855539	HS3ST2	29457	17	26.73	2.96e-55
	chr16	23093614	23093836	USP31	66756	12.5	39.58	1.85e-47
	chr16	23559023	23559245	EARS2	9452	15.2	47.91	1.45e-60
	chr16	23720778	23721000	ERN2	3822	14.1	11.11	2.34e-30
	chr16	23735062	23735284	ERN2	10241	9.47	29.86	4.3e-32
	chr16	24393199	24393421	CACNG3	126325	108.1	113.65	0
	chr16	25037997	25038219	LOC554206	4844	25.5	26.85	1.07e-82
	chr16	25201460	25201682	AQP8	26604	4.84	30.55	1.42e-17
	chr16	25565112	25565334	HS3ST4	138014	315.5	331.68	0
	chr16	25580376	25580598	HS3ST4	122750	122	384.69	0
	chr16	27034440	27034662	C16orf82	43558	45.6	71.87	3.97e-206
	chr16	27420183	27420405	IL21R	18175	27.1	85.41	1.32e-129
	chr16	27426123	27426345	IL21R	12235	40.5	31.94	1.82e-139
	chr16	27570741	27570963	KIAA0556	9273	14.3	22.57	4.16e-44
	chr16	27735331	27735553	KIAA0556	173863	28.6	90.27	2.5e-139
	chr16	28004988	28005210	GSG1L	69621	122.6	193.39	0
	chr16	28548514	28548736	NUPR1	1760	42.3	66.66	1.01e-187
	chr16	28911376	28911598	LOC100289092	20134	89.8	47.22	0
	chr16	29654613	29654835	SPN	19706	11.4	36.11	1.02e-42
	chr16	29730349	29730571	C16orf54	26770	11.7	18.4	2.64e-32
	chr16	30961544	30961766	ORAI3	1139	27.3	28.7	2.29e-91
	chr16	31281860	31282082	ITGAM	10572	15.4	48.61	3.03e-62
	chr16	31285145	31285367	ITGAM	13857	86.5	90.96	0
	chr16	31296104	31296326	ITGAM	24816	8.37	26.39	9.47e-28
	chr16	31550609	31550831	AHSP	11406	12.1	12.73	1.39e-28
	chr16	34796126	34796348	LOC100130700	55286	7.71	12.15	3.98e-18
	chr16	47078562	47078784	DNAJA2	70937	17.2	10.83	1.78e-36
	chr16	47828481	47828703	LOC101927132	63790	21.6	34.02	1.66e-77
	chr16	49005723	49005945	CBLN1	309798	7.71	8.1	2.57e-14
	chr16	49099643	49099865	CBLN1	215878	8.15	12.85	3.17e-19
	chr16	49150841	49151063	CBLN1	164680	15.6	24.65	1.3e-49
	chr16	49889564	49889786	ZNF423	2045	11	17.36	8.35e-30
	chr16	50200870	50201092	PAPD5	14041	40.1	21.06	1.22e-116
	chr16	50299255	50299477	ADCY7	975	4.18	26.39	1.19e-14
	chr16	50538074	50538296	NKD1	43946	4.4	27.78	1.19e-14
	chr16	50850692	50850914	CYLD	74731	5.5	34.72	1.3e-20
	chr16	50864644	50864866	CYLD	88683	18.3	19.21	2.03e-51
	chr16	53002638	53002860	CHD9	86086	4.4	27.78	1.19e-14
	chr16	53045412	53045634	CHD9	43312	43.4	136.79	1.01e-233
	chr16	53075709	53075931	CHD9	13015	15.2	23.96	7.68e-47
	chr16	53086437	53086659	CHD9	2287	55.5	43.75	1.67e-213
	chr16	53153471	53153693	CHD9	64526	7.93	50	5.83e-32
	chr16	53304005	53304227	LOC643802	100815	13.4	8.47	1.23e-24
	chr16	53412068	53412290	LOC102723373	4663	87.8	46.18	0
	chr16	53483813	53484035	RBL2	15462	20.3	10.65	1.46e-41
	chr16	53960173	53960395	FTO-IT1	112911	22.9	24.07	1.91e-71
	chr16	54373105	54373327	IRX3	52727	22	69.44	2.18e-99
	chr16	54637162	54637384	IRX3	316784	11.7	12.27	2.19e-26
	chr16	54865016	54865238	CRNDE	97864	11.2	17.71	4.76e-31
	chr16	54881167	54881389	CRNDE	81713	10.3	8.16	1.46e-18
	chr16	55511453	55511675	MMP2	3800	5.28	16.67	1.87e-14
	chr16	56102790	56103012	LOC283856	121995	5.72	18.05	6.06e-17
	chr16	56556146	56556368	BBS2	2138	33.5	52.77	5.17e-138
	chr16	56798156	56798378	NUP93	34139	12.5	13.19	1.07e-29
	chr16	57208957	57209179	FAM192A	10798	13.9	21.87	2.06e-41
	chr16	58646977	58647199	CNOT1	16592	26.2	41.32	1.41e-99
	chr16	58770097	58770319	GOT2	1836	7.49	47.22	2.8e-30
	chr16	60022589	60022811	LOC101927580	133332	8.15	12.85	3.17e-19
	chr16	61967221	61967443	CDH8	103297	14.5	45.83	3.14e-57
	chr16	64471646	64471868	CDH11	684052	11.9	37.5	2.75e-44
	chr16	65803048	65803270	LINC00922	192845	39	61.45	7.41e-168
	chr16	66042714	66042936	CDH5	357590	6.61	20.83	1.59e-19
	chr16	66221950	66222172	CDH5	178354	5.5	34.72	1.3e-20
	chr16	66709020	66709242	CMTM4	21369	25.3	26.62	2.85e-81
	chr16	66961889	66962111	RRAD	2450	166.2	104.85	0
	chr16	67443245	67443467	ZDHHC1	6873	6.38	10.07	6.44e-14
	chr16	67578405	67578627	FAM65A	7040	9.03	14.23	1.28e-22
	chr16	67904687	67904909	EDC4	2018	12.5	19.79	3.84e-36
	chr16	68000154	68000376	SLC12A4	2222	49.3	51.85	9.53e-202
	chr16	68125675	68125897	NFATC3	6406	22.5	14.17	5.13e-54
	chr16	68145318	68145540	NFATC3	26049	26.6	21.01	2.17e-78
	chr16	68309595	68309817	SLC7A6	11176	14.3	11.28	2.08e-31
	chr16	68636229	68636451	CDH3	41701	6.16	9.72	6.48e-13
	chr16	68970773	68970995	TANGO6	93264	55.5	19.44	2.21e-154
	chr16	69438529	69438751	TERF2	18638	33.2	20.97	3.39e-96
	chr16	69569263	69569485	MIR1538	30287	11.4	9.03	2.61e-22
	chr16	70167365	70167587	PDPR	19836	8.15	8.56	3.07e-15
	chr16	70416237	70416459	DDX19A	35413	7.93	50	5.83e-32
	chr16	70612833	70613055	IL34	744	16.1	16.9	1.25e-42
	chr16	70816233	70816455	VAC14	18607	9.03	28.47	1.25e-30
	chr16	70973326	70973548	VAC14	138265	46	29.03	1.94e-153
	chr16	71554044	71554266	CHST4	5758	5.5	17.36	1.09e-15
	chr16	71870591	71870813	ATXN1L	9082	7.71	48.61	5.83e-32
	chr16	72805085	72805307	ZFHX3	287228	29.1	91.66	2.75e-141
	chr16	73074187	73074409	ZFHX3	18126	12.8	10.07	3.01e-26
	chr16	74465302	74465524	CLEC18B	9934	44.3	69.79	9.95e-199
	chr16	74763894	74764116	MLKL	29105	12.1	38.19	7.22e-46
	chr16	74773483	74773705	FA2H	35025	21.4	13.47	1.35e-50
	chr16	74779717	74779939	FA2H	28791	17.8	18.75	3.87e-50
	chr16	74901643	74901865	FA2H	92914	58.8	37.08	3.42e-214
	chr16	75121129	75121351	LDHD	29320	15.6	24.65	1.3e-49
	chr16	75339224	75339446	BCAR1	53698	17	26.73	2.96e-55
	chr16	75519976	75520198	CHST6	8729	52	32.77	2.97e-180
	chr16	75553855	75554077	CHST5	14992	20.3	21.29	3.02e-59
[truncated: 3,688 more rows]

## Sheet: MCF7
TP53 ChIP-seq - MCF7 - HOMER Peak Results (Nutlin vs. Input)
	Chromosome	Start	End	Closest gene (by TSS) ID	Distance peak to TSS	Normalized read count	Fold change (vs input)	p-value (vs input)
	chr1	989301	989521	RNF223	20167	16.5	27.63	3.98e-58
	chr1	1153328	1153548	TNFRSF4	3780	24.1	40.27	2.34e-96
	chr1	1186330	1186550	FAM132A	4228	59.9	100.22	2.79e-316
	chr1	1356759	1356979	ANKRD65	0	17.9	59.96	2.7e-81
	chr1	1805997	1806217	GNB1	16340	11.2	37.62	2.75e-44
	chr1	1838996	1839216	CALML6	7051	83.8	280.39	0
	chr1	2159079	2159299	SKI	836	51.5	43.06	3.15e-210
	chr1	2423578	2423798	PLCH2	15824	10	33.51	4.36e-38
	chr1	2921168	2921388	ACTRT2	16659	15.5	51.73	2.42e-67
	chr1	3597676	3597896	TP73	9341	35.7	59.66	1.64e-162
	chr1	4004791	4005011	LINC01346	4119	7.73	51.73	1.17e-33
	chr1	4403024	4403244	LOC284661	68868	25.1	28.02	1.86e-88
	chr1	4591098	4591318	LOC284661	118987	17.9	29.98	5.82e-64
	chr1	5143961	5144181	AJAP1	428856	90.5	60.55	0
	chr1	5713968	5714188	MIR4417	89837	21.8	24.3	1.91e-71
	chr1	6134357	6134577	KCNAB2	28183	122	203.97	0
	chr1	6474648	6474868	HES2	5112	207	692.45	0
	chr1	6618813	6619033	TAS1R1	3475	27.2	91.11	2.75e-141
	chr1	6924837	6925057	CAMTA1	79453	35.3	118.15	7.92e-196
	chr1	7394867	7395087	VAMP3	436243	27.9	93.46	3.21e-145
	chr1	8427560	8427780	SLC45A1	49415	40.4	45.07	4.88e-168
	chr1	8730663	8730883	MIR6728	195767	84.5	141.37	0
	chr1	8971650	8971870	ENO1-AS1	32756	98.1	328	0
	chr1	9242114	9242334	MIR34A	30278	479.1	801.19	0
	chr1	9510443	9510663	LOC100506022	21468	40.1	134.02	1.86e-229
	chr1	9951212	9951432	CTNNBIP1	18885	20.4	68.19	1.51e-97
	chr1	10143257	10143477	UBE4B	50216	110.7	185.16	0
	chr1	10969934	10970154	C1orf127	71941	20.4	34.09	1.66e-77
	chr1	11086175	11086395	TARDBP	13496	31.3	209.26	2.9e-198
	chr1	11619375	11619595	LOC101929181	49994	102.8	171.94	0
	chr1	12025987	12026207	MFN2	14032	23.9	79.94	4.16e-118
	chr1	12267229	12267449	MIR4632	15459	169.1	565.48	0
	chr1	12292412	12292632	VPS13D	2299	25	83.47	9.44e-126
	chr1	12678377	12678597	DHRS3	640	107.7	720.66	0
	chr1	12700624	12700844	AADACL4	3723	122	101.99	0
	chr1	12846260	12846480	PRAMEF1	5067	22.7	37.91	2.12e-88
	chr1	14847371	14847591	KAZN	403035	8.08	54.08	4.15e-37
	chr1	14981156	14981376	KAZN	269250	14.6	24.39	3.2e-48
	chr1	15059667	15059887	KAZN	190739	78.2	523.16	0
	chr1	15234007	15234227	KAZN	16399	75.9	84.65	0
	chr1	15373041	15373261	TMEM51-AS1	105700	27.6	23.07	3.77e-89
	chr1	15592752	15592972	FHAD1	18984	16.5	110.51	1.33e-90
	chr1	15629688	15629908	FHAD1	55920	65.4	218.67	0
	chr1	15727238	15727458	EFHD2	8934	36.4	121.68	4.58e-202
	chr1	16243038	16243258	ZBTB17	59370	39.9	66.72	1.01e-187
	chr1	16511199	16511419	ARHGEF19	27686	150.8	126.09	0
	chr1	16723180	16723400	SZRD1	29655	21.8	36.44	1.07e-83
	chr1	16819322	16819542	CROCCP3	126	34.1	114.04	1.46e-187
	chr1	16886270	16886490	NBPF1	53611	453.8	189.72	0
	chr1	17252151	17252371	CROCC	3706	49	41	3.12e-197
	chr1	17636288	17636508	PADI4	1598	103.9	173.7	0
	chr1	17770019	17770239	RCC2	3769	189.6	211.42	0
	chr1	17818654	17818874	RCC2	52404	42.5	71.13	2.84e-204
	chr1	17908607	17908827	ARHGEF10L	1559	58.7	49.08	3.71e-250
	chr1	18284409	18284629	IGSF21	149612	54.1	362.1	0
	chr1	18492164	18492384	IGSF21	57924	112.1	125.01	0
	chr1	18807473	18807693	KLHDC7A	49	58.3	32.53	5.42e-215
	chr1	19249468	19249688	ALDH4A1	32083	18.3	30.57	6.35e-67
	chr1	19324829	19325049	IFFO2	42003	81.5	68.19	0
	chr1	19777360	19777580	CAPZB	34556	12.3	82.29	8.25e-63
	chr1	20301483	20301703	PLA2G2A	5230	27.6	92.29	2.99e-143
	chr1	20460146	20460366	PLA2G2F	5458	105.1	175.76	0
	chr1	21210363	21210583	HP1BP3	97182	107.2	89.64	0
	chr1	21723073	21723293	NBPF3	43291	62.6	69.75	5.24e-298
	chr1	22056944	22057164	USP48	52525	71.7	119.91	0
	chr1	22114591	22114811	USP48	4903	56.4	94.34	1.99e-292
	chr1	22160560	22160780	LDLRAD2	21802	34.4	230.42	4.99e-224
	chr1	22282399	22282619	HSPG2	18609	57.6	96.4	2.42e-300
	chr1	22301288	22301508	CELA3B	1911	176.3	589.58	0
	chr1	22326228	22326448	CELA3A	1702	47.3	158.12	2e-281
	chr1	22369737	22369957	CDC42	9164	35.5	23.75	4.52e-115
	chr1	22385021	22385241	CDC42	5901	25.3	169.29	9.46e-153
	chr1	22396667	22396887	CDC42	17547	44.3	74.06	1.91e-215
	chr1	23144030	23144250	MIR4253	45470	151.8	507.87	0
	chr1	23591555	23591775	LINC01355	20237	16.3	54.67	1.62e-72
	chr1	23703954	23704174	ZNF436	7597	90.2	75.39	0
	chr1	23919157	23919377	ID3	32872	350.8	391.09	0
	chr1	24160683	24160903	HMGCL	8734	22.1	74.06	1.13e-108
	chr1	24455799	24456019	IL22RA1	13757	59.2	49.52	1.52e-253
	chr1	25298848	25299068	RUNX3	42078	235.2	393.25	0
	chr1	25379843	25380063	RUNX3	123073	20.6	68.77	1.51e-97
	chr1	25418869	25419089	SYF2	139925	15.1	50.55	1.23e-65
	chr1	25808878	25809098	TMEM57	51529	25	27.82	5.22e-87
	chr1	26728495	26728715	LIN28A	8555	24.6	41.15	1.41e-99
	chr1	27187710	27187930	SFN	1704	64.3	43.03	2.82e-262
	chr1	27669467	27669687	SYTL1	984	96.5	322.71	0
	chr1	27808834	27809054	WASF2	7625	31.3	52.32	2.72e-136
	chr1	27869466	27869686	WASF2	52788	118.6	198.39	0
	chr1	27963265	27963485	FGR	1538	19.9	66.42	6.86e-94
	chr1	28497845	28498065	PTAFR	22383	23.2	155.18	2.76e-137
	chr1	28568457	28568677	ATPIF1	5855	105.1	703.03	0
	chr1	28586717	28586937	SESN2	754	45.7	50.94	1.29e-196
	chr1	28619249	28619469	SESN2	33286	28.5	23.81	2.9e-93
	chr1	28678858	28679078	PHACTR4	17016	162.6	108.75	0
	chr1	28694842	28695062	PHACTR4	1032	16	53.49	8.77e-71
	chr1	28699851	28700071	PHACTR4	3758	55.4	92.58	1.63e-286
	chr1	29565818	29566038	PTPRU	2790	227.2	152.01	0
	chr1	29685199	29685419	LOC101928460	8573	14.1	47.03	1.45e-60
	chr1	30182746	30182966	LOC101929406	327494	264.3	221.02	0
	chr1	30272049	30272269	LOC101929406	238191	24.4	40.85	5.79e-98
	chr1	30460605	30460825	LOC101929406	49635	105.4	352.69	0
	chr1	30804214	30804434	LOC101929406	293755	12.5	41.73	1.13e-50
	chr1	30893559	30893779	MATN1-AS1	297841	85.2	95.03	0
	chr1	31045146	31045366	MATN1-AS1	146254	17.8	29.68	5.82e-64
	chr1	31221029	31221249	MIR4420	8950	87.9	293.91	0
	chr1	31520540	31520760	PUM1	17805	111.6	124.42	0
	chr1	31939654	31939874	LINC01225	31966	121.4	406.18	0
	chr1	31983703	31983923	LINC01226	114	17.9	29.98	5.82e-64
	chr1	32085458	32085678	HCRTR1	2157	44.6	149.31	9.72e-262
	chr1	32162146	32162366	COL16A1	7403	8.08	54.08	4.15e-37
	chr1	32219241	32219461	MIR4254	4876	29.7	33.11	9.45e-111
	chr1	32599093	32599313	KPNA6	25449	12.1	81.12	6.76e-61
	chr1	32698624	32698844	MTMR9LP	8468	40.1	44.67	2.2e-166
	chr1	32959867	32960087	ZBTB8B	29209	28.6	191.63	1.48e-177
	chr1	33325086	33325306	FNDC5	12788	25.8	28.8	2.29e-91
	chr1	33429395	33429615	RNF19B	672	31.8	35.46	1.68e-121
	chr1	34883784	34884004	C1orf94	241231	14.9	49.96	6.17e-64
	chr1	37182830	37183050	CSF3R	233915	52.5	58.59	1.41e-236
	chr1	37566089	37566309	MIR4255	60856	98.6	164.88	0
	chr1	38300435	38300655	MTF1	24638	96.8	80.97	0
	chr1	38390603	38390823	INPP5B	21907	12.1	81.12	6.76e-61
	chr1	38412667	38412887	INPP5B	0	53.6	179.28	0
	chr1	38665224	38665444	LINC01343	14996	23.4	39.09	3.71e-93
	chr1	38752917	38753137	LINC01343	72478	104.7	350.34	0
	chr1	38980301	38980521	LINC01343	299862	29.7	33.11	9.45e-111
	chr1	39302866	39303086	RRAGC	22410	13.5	22.63	4.16e-44
	chr1	39367195	39367415	GJA9-MYCBP	19897	47.3	158.12	2e-281
	chr1	39367195	39367415	GJA9	19897	47.3	158.12	2e-281
	chr1	39493539	39493759	NDUFS5	1572	34.1	114.04	1.46e-187
	chr1	39812628	39812848	KIAA0754	62329	148.2	165.18	0
	chr1	40268578	40268798	BMP8B	14045	24.4	81.71	6.42e-122
	chr1	40442619	40442839	MFSD2A	21835	125	104.48	0
	chr1	41100600	41100820	RIMS3	30505	11.2	37.62	2.75e-44
	chr1	41168522	41168742	NFYC-AS1	10589	15.3	102.28	1.74e-82
	chr1	41177190	41177410	NFYC-AS1	19257	73.5	122.85	0
	chr1	41235533	41235753	MIR30C1	12577	54	45.11	2.19e-223
	chr1	41352356	41352576	CITED4	24338	47.8	159.89	1.26e-283
	chr1	41472692	41472912	SLFNL1-AS1	7351	72.1	80.33	0
	chr1	41788952	41789172	FOXO6	38432	37.4	41.73	1.18e-151
	chr1	41939542	41939762	EDN2	10583	25.7	85.82	1.32e-129
	chr1	41948011	41948231	EDN2	2114	200.9	335.94	0
	chr1	42081916	42082136	EDN2	131572	43.8	146.37	3.15e-255
	chr1	42657879	42658099	GUCA2A	27484	24.6	27.43	1.45e-85
	chr1	42998868	42999088	CCDC30	1473	164.2	274.51	0
	chr1	43187665	43187885	CLDN19	18041	31.8	35.46	1.68e-121
	chr1	43403614	43403834	SLC2A1-AS1	20887	54.3	36.33	6.22e-208
	chr1	43618577	43618797	FAM183A	4983	152	84.74	0
	chr1	44047957	44048177	PTPRF	51410	60.6	202.8	0
	chr1	44140748	44140968	KDM4A	24951	32.5	54.37	3.38e-143
	chr1	45265501	45265721	PLK3	316	191.2	127.91	0
	chr1	46023268	46023488	AKR1A1	6813	81.5	136.37	0
	chr1	46079008	46079228	CCDC17	10504	75.2	251.59	0
	chr1	46423176	46423396	MAST2	153891	90	300.96	0
	chr1	46537619	46537839	PIK3R3	60870	45.2	37.77	1.78e-176
	chr1	46648955	46649175	TSPAN1	8206	38.3	256.29	4.62e-255
	chr1	46684219	46684439	LURAP1	15213	60.1	402.07	0
	chr1	46822892	46823112	NSUN4	17043	14.2	95.23	1.67e-74
	chr1	46949675	46949895	DMBX1	22774	12	79.94	5.41e-59
	chr1	47105309	47105529	MOB3C	24504	105.3	58.68	0
	chr1	47263744	47263964	CYP4B1	707	19	63.48	1.88e-88
	chr1	48035477	48035697	FOXD2	133788	42.7	35.71	2.17e-162
	chr1	48198310	48198530	TRABD2B	264033	48.3	161.65	4.88e-288
	chr1	48534222	48534442	TRABD2B	71660	16.7	55.84	2.95e-74
	chr1	48559417	48559637	SKINTL	88464	14.1	23.51	7.68e-47
	chr1	48691274	48691494	SLC5A9	2917	23.4	39.09	3.71e-93
	chr1	49021023	49021243	SPATA6	83143	33.6	112.27	1.88e-183
	chr1	50604948	50605168	ELAVL4	91262	72.2	483.19	0
	chr1	50632056	50632276	ELAVL4	118370	29.7	49.67	9.38e-128
	chr1	51069304	51069524	DMRTA2	180185	161.7	540.79	0
	chr1	51076351	51076571	DMRTA2	187232	15.6	52.32	4.65e-69
	chr1	51875924	51876144	TTC39A	87986	17.6	29.39	1.72e-62
	chr1	52058424	52058644	EPS15	73429	24.3	27.04	3.95e-84
	chr1	52157988	52158208	OSBPL9	37279	85.9	71.86	0
	chr1	52159356	52159576	OSBPL9	35911	97	162.24	0
	chr1	52294785	52295005	MIR761	7070	39.7	66.42	6.69e-186
	chr1	52444642	52444862	RAB3B	11575	15.8	26.45	7.85e-54
	chr1	52539591	52539811	BTF3L4	17734	13.2	88.17	1.3e-68
	chr1	52834680	52834900	CC2D1B	2803	38.8	64.95	1.88e-180
	chr1	53022700	53022920	ZCCHC11	3938	42.4	35.42	7.72e-161
	chr1	53138651	53138871	COA7	25168	22.1	37.03	7.94e-87
	chr1	53226310	53226530	ZYG11B	34179	26	43.5	4.42e-106
	chr1	53415322	53415542	ECHDC2	27876	32.2	53.79	1.82e-141
	chr1	53666963	53667183	CPT2	4862	50.1	335.06	0
	chr1	53779337	53779557	LRP8	14265	10.9	72.89	2.37e-53
	chr1	54373020	54373240	DIO1	13159	19.2	32.04	2.03e-71
	chr1	55525817	55526037	PCSK9	19922	34.4	38.4	1.29e-135
	chr1	55590234	55590454	PCSK9	84339	16	26.75	2.96e-55
	chr1	56397438	56397658	PPAP2B	647600	36.6	40.76	8.36e-147
	chr1	56530457	56530677	PPAP2B	514581	7.21	24.1	6.18e-25
	chr1	56869092	56869312	PPAP2B	175946	7.21	24.1	6.18e-25
	chr1	56905446	56905666	PPAP2B	139592	23.4	39.09	3.71e-93
	chr1	56999394	56999614	PPAP2B	45644	37.6	41.93	1.18e-151
	chr1	57171306	57171526	PRKAA2	60316	25.8	28.8	2.29e-91
	chr1	57284779	57284999	C1orf168	371	26.7	29.78	9.08e-96
	chr1	58096456	58096676	DAB1-AS1	229540	33	36.84	9.8e-128
	chr1	58672579	58672799	DAB1	43413	29.5	98.75	3.94e-155
	chr1	59441638	59441858	LINC01358	44291	17.4	58.19	1.59e-79
	chr1	59962198	59962418	FGGY	18884	10.4	34.68	1.28e-39
	chr1	60087064	60087284	FGGY	105763	9.49	31.74	4.62e-35
	chr1	60097377	60097597	MIR4711	101372	27.2	45.56	2.53e-114
	chr1	60195926	60196146	MIR4711	2823	30.2	33.7	8.41e-114
	chr1	60825946	60826166	C1orf87	286504	26.9	29.98	9.08e-96
	chr1	61607315	61607535	NFIA	64369	24.4	40.85	5.79e-98
	chr1	62339354	62339574	INADL	131205	24.3	40.56	5.79e-98
	chr1	62368995	62369215	INADL	160846	58.2	194.57	0
	chr1	63498942	63499162	ATG4C	249165	30.6	34.09	2.47e-115
	chr1	63669908	63670128	LINC00466	112774	9.14	30.57	1.43e-33
	chr1	64444249	64444469	ROR1-AS1	135006	49.9	166.94	4.11e-299
	chr1	64876898	64877118	CACHD1	59359	52	173.99	1.00e-314
	chr1	65038242	65038462	MIR4794	7069	11.4	38.21	7.22e-46
	chr1	65455252	65455472	LINC01359	12688	10.5	35.27	3.66e-41
	chr1	65461067	65461287	LINC01359	6873	36.7	122.85	3.76e-204
	chr1	65611399	65611619	AK4	1614	21.1	70.54	3.12e-101
	chr1	66866402	66866622	PDE4B	68609	25.7	42.91	1.9e-104
	chr1	67612344	67612564	C1orf141	11690	66.3	221.61	0
	chr1	67680991	67681211	IL23R	48822	17.8	118.74	7.59e-99
	chr1	67799360	67799580	IL12RB2	26313	8.26	27.63	3.5e-29
	chr1	67832676	67832896	IL12RB2	59629	54.3	181.64	0
	chr1	67875520	67875740	SERBP1	20384	75.6	84.25	0
	chr1	68152362	68152582	GADD45A	1502	430.6	720.08	0
	chr1	68190938	68191158	GADD45A	40078	111.4	372.68	0
	chr1	68204251	68204471	GADD45A	53391	44.6	298.61	2.23e-306
	chr1	68312335	68312555	GNG12	13180	18.3	30.57	6.35e-67
	chr1	69521002	69521222	DEPDC1	558098	344.5	384.04	0
	chr1	70797819	70798039	ANKRD13C	22379	30.1	50.26	1.88e-129
	chr1	72466559	72466779	NEGR1-IT1	163864	502.6	420.29	0
	chr1	74625833	74626053	LRRIQ3	37819	46	38.5	3.17e-181
	chr1	74916166	74916386	TNNI3K	215095	24.6	82.29	7.83e-124
	chr1	75557850	75558070	LHX8	36050	145.9	97.58	0
	chr1	75837635	75837855	SLC44A5	238945	133	444.98	0
	chr1	76157927	76158147	ACADM	31886	30.6	102.28	3.86e-163
	chr1	76320832	76321052	MSH4	58276	9.49	63.48	3.43e-44
	chr1	77385031	77385251	ST6GALNAC5	51845	46.9	78.47	1.68e-230
	chr1	77875131	77875351	AK5	126844	95.3	106.2	0
	chr1	78282702	78282922	FAM73A	37393	15.8	52.9	4.65e-69
	chr1	78414770	78414990	FUBP1	29788	26	173.99	3.24e-157
	chr1	78578937	78579157	GIPC2	67348	61.5	68.58	1.2e-290
	chr1	79723276	79723496	ELTD1	250781	14.2	23.81	7.68e-47
	chr1	80683267	80683487	ELTD1	1210772	85.9	95.81	0
	chr1	81975389	81975609	LPHN2	290474	12.8	42.91	2.68e-52
	chr1	82340181	82340401	LPHN2	74099	121.6	67.79	0
	chr1	82346384	82346604	LPHN2	80302	39.2	65.54	4.42e-184
	chr1	82691917	82692137	LPHN2	425835	139.9	155.97	0
	chr1	83280950	83281170	LINC01361	170722	22.7	75.83	1.5e-110
	chr1	83477080	83477300	LINC01361	25189	176.8	197.11	0
	chr1	83532110	83532330	LINC01361	80219	23	25.67	1.95e-78
	chr1	83780122	83780342	LINC01361	328231	13.9	23.22	1.81e-45
	chr1	84798119	84798339	SAMD13	34070	11.4	38.21	7.22e-46
	chr1	85051520	85051740	CTBS	11357	58.9	65.64	3.26e-274
	chr1	85308492	85308712	LPAR3	50185	12.5	83.47	8.25e-63
	chr1	85697652	85697872	C1orf52	27484	28.1	188.1	2.82e-175
	chr1	86570870	86571090	COL24A1	51032	5.98	39.97	9.51e-24
	chr1	86889661	86889881	CLCA2	0	32.2	107.57	3.03e-173
	chr1	86979849	86980069	CLCA4	32691	28.3	94.64	3.42e-147
	chr1	87315776	87315996	SEP15	64112	32.9	109.92	2.57e-177
	chr1	87594612	87594832	LINC01140	617	7.56	50.55	1.17e-33
	chr1	87640485	87640705	LOC101927844	37648	106.9	119.13	0
	chr1	88501382	88501602	PKN2	648321	29.7	198.68	1.03e-186
	chr1	88522819	88523039	PKN2	626884	9.49	31.74	4.62e-35
	chr1	88788383	88788603	PKN2	361320	7.91	26.45	9.47e-28
	chr1	89010783	89011003	PKN2	138920	17.8	118.74	7.59e-99
	chr1	89113073	89113293	PKN2	36630	50.8	28.31	1.94e-176
	chr1	89267614	89267834	GTF2B	89468	276.5	231.16	0
	chr1	89771985	89772205	LOC729930	15940	51.7	172.82	1.73e-312
	chr1	91521495	91521715	ZNF644	33683	43.1	72.01	5.51e-208
	chr1	91665342	91665562	ZNF644	177530	11.1	74.06	3.21e-55
	chr1	91725165	91725385	HFM1	145042	14.9	24.98	1.3e-49
	chr1	91995530	91995750	CDC7	29126	213	101.78	0
	chr1	92070551	92070771	CDC7	104147	43.6	72.89	7.6e-210
	chr1	92073332	92073552	CDC7	106928	49.2	164.59	1.13e-294
	chr1	93688944	93689164	CCDC18	42671	106.2	177.52	0
	chr1	93961998	93962218	FNBP1L	48310	19.3	129.32	2.59e-109
	chr1	94095003	94095223	BCAR3	15301	39.9	44.48	9.81e-165
	chr1	94426455	94426675	GCLM	51443	37.3	41.54	4.93e-150
	chr1	94887503	94887723	ABCD3	3570	39.9	66.72	1.01e-187
	chr1	95302540	95302760	SLC44A3	16642	141.1	472.02	0
	chr1	95633128	95633348	TMEM56-RWDD3	49649	27.2	45.56	2.53e-114
	chr1	95818047	95818267	RWDD3	118336	32.3	54.08	3.38e-143
	chr1	96250677	96250897	LOC100996635	275005	33.9	113.45	1.66e-185
	chr1	96573820	96574040	LOC101928241	265642	45.7	76.42	5.97e-223
	chr1	96775388	96775608	LOC101928241	64074	24.8	41.44	1.41e-99
	chr1	96799903	96800123	LOC101928241	39559	53.6	89.64	9.4e-275
	chr1	97527244	97527464	DPYD-AS1	34016	33.7	112.86	1.88e-183
	chr1	97954134	97954354	DPYD-AS2	308124	27.8	30.96	3.25e-100
	chr1	98240022	98240242	DPYD-AS2	22236	20	67.01	1.02e-95
	chr1	98930566	98930786	SNX7	196451	74.3	248.65	0
	chr1	98981941	98982161	SNX7	145076	121.3	811.19	0
	chr1	99142994	99143214	SNX7	15758	27.4	183.4	1.81e-168
	chr1	100046020	100046240	PALMD	65192	32.7	54.67	6.2e-145
	chr1	100409004	100409224	SLC35A3	26122	29	24.25	1.21e-94
	chr1	100895956	100896176	CDC14A	77933	202.1	675.99	0
	chr1	101301491	101301711	EXTL2	59025	35	116.98	1.09e-191
	chr1	101992429	101992649	S1PR1	290124	65.9	220.43	0
	chr1	103766011	103766231	COL11A1	191959	33.6	112.27	1.88e-183
	chr1	104946015	104946235	LOC100129138	330370	6.68	22.34	3.42e-22
	chr1	107031859	107032079	PRMT6	567189	501.4	119.79	0
	chr1	107158162	107158382	PRMT6	440886	182.1	32.05	0
	chr1	107292615	107292835	PRMT6	306433	423.4	56.64	0
	chr1	107412834	107413054	PRMT6	186214	544.8	67.49	0
	chr1	107541117	107541337	PRMT6	57931	116.3	48.64	0
	chr1	107870155	107870375	NTNG1	187410	204.7	24.46	0
	chr1	108220382	108220602	VAV3	10525	145.5	81.12	0
	chr1	109112789	109113009	FAM102B	9818	60.6	33.8	1.23e-225
	chr1	109388598	109388818	AKNAD1	10909	342.2	381.49	0
	chr1	109740686	109740906	KIAA1324	11515	178.9	199.47	0
	chr1	109756959	109757179	SARS	444	112.8	62.9	0
	chr1	109839549	109839769	MYBPHL	9895	43.2	48.2	4.65e-183
	chr1	110108922	110109142	GNAI3	17736	132.5	110.8	0
	chr1	110363257	110363477	EPS8L3	56613	68.4	28.58	1.89e-238
	chr1	110454088	110454308	CSF1	855	58.7	65.44	3.26e-274
	chr1	111447176	111447396	CD53	31454	88.1	98.17	0
	chr1	111757159	111757379	DENND2D	9999	895.6	748.88	0
	chr1	111907461	111907681	PIFO	18266	717.6	480.01	0
	chr1	112281117	112281337	FAM212B	710	50.3	42.03	1.04e-203
	chr1	112603773	112603993	LOC643355	70583	36.9	61.72	1.2e-169
	chr1	112784427	112784647	CTTNBP2NL	154154	18.1	30.27	1.94e-65
	chr1	112862324	112862544	CTTNBP2NL	76257	156.1	521.98	0
	chr1	112901399	112901619	CTTNBP2NL	37182	72.4	80.73	0
	chr1	113166640	113166860	CAPZA1	4565	25.7	42.91	1.9e-104
	chr1	113188905	113189125	CAPZA1	26830	92.3	102.87	0
	chr1	113230075	113230295	MOV10	13141	702.3	587.23	0
	chr1	113246443	113246663	RHOC	3363	103.5	86.56	0
	chr1	113305783	113306003	FAM19A3	42594	528	353.16	0
	chr1	113417145	113417365	LINC01356	23880	40.9	68.48	3.27e-193
	chr1	114459789	114460009	DCLRE1B	11874	349	46.7	0
	chr1	114879037	114879257	TRIM33	174525	846.4	176.93	0
	chr1	115071946	115072166	TRIM33	18165	176.5	49.18	0
	chr1	115153315	115153535	BCAS2	29050	425.7	79.09	0
	chr1	115345791	115346011	SIKE1	22483	211.3	41.56	0
	chr1	115843224	115843444	NGF	37414	147.1	41	0
	chr1	116314492	116314712	CASQ2	3066	87.7	73.33	0
	chr1	116381935	116382155	NHLH2	1179	491.2	273.82	0
	chr1	116420168	116420388	NHLH2	36835	278.6	232.92	0
	chr1	116674560	116674780	MAB21L3	20184	59.4	33.11	1.53e-219
	chr1	117421825	117422045	PTGFRN	30645	791.8	165.51	0
	chr1	119884061	119884281	HAO2	27122	53.6	89.64	9.4e-275
	chr1	119901388	119901608	HAO2	9795	85.2	47.52	0
	chr1	120147794	120148014	LINC00622	5880	123.4	68.77	0
	chr1	120879391	120879611	HIST2H2BA	26424	6.85	22.92	3.42e-22
	chr1	121131882	121132102	SRGAP2-AS1	7664	12.8	85.82	9.82e-65
	chr1	121285911	121286131	EMBP1	25001	197.7	220.43	0
	chr1	142705742	142705962	ANKRD20A12P	7644	35.5	237.48	3.9e-231
	chr1	142834260	142834480	ANKRD20A12P	120655	121.1	810.01	0
	chr1	142892404	142892624	ANKRD20A12P	178799	6.85	22.92	3.42e-22
	chr1	143202222	143202442	LOC102723769	0	42.9	143.43	9.61e-249
	chr1	143385999	143386219	LOC102723769	183760	29	96.99	3.75e-151
	chr1	143469304	143469524	LOC102723769	267065	25.8	172.82	3.24e-157
	chr1	143668747	143668967	LINC01138	75553	13	43.5	6.23e-54
	chr1	144010736	144010956	FAM72D	97593	2026.6	564.84	0
	chr1	147314610	147314830	GJA8	60117	61.3	51.29	1.82e-265
	chr1	148604805	148605025	NBPF15	46617	7.56	50.55	1.17e-33
	chr1	148887348	148887568	DRD5P2	14278	29.5	49.38	4.64e-126
	chr1	149869439	149869659	BOLA1	1497	83.7	93.27	0
	chr1	150596819	150597039	ENSA	5060	187	125.09	0
	chr1	150633726	150633946	ENSA	31628	42.4	23.61	7.14e-137
	chr1	150720366	150720586	CTSS	17848	62.7	34.98	2.18e-236
	chr1	151031222	151031442	CDC42SE1	684	219	146.48	0
	chr1	151167761	151167981	PIP5K1A	3041	116.9	65.15	0
	chr1	151357469	151357689	SELENBP1	12259	72.9	34.85	3.72e-274
	chr1	151830620	151830840	THEM5	4447	55.5	46.44	1.09e-231
	chr1	151962844	151963064	S100A10	3651	257.5	172.23	0
	chr1	152140329	152140549	RPTN	8625	458.7	255.7	0
	chr1	152450148	152450368	LCE5A	32953	66.6	222.78	0
	chr1	152758571	152758791	LCE1E	0	113	54	0
	chr1	152783635	152783855	LCE1B	593	46.2	77.3	1.01e-226
	chr1	152877843	152878063	IVL	2977	81.5	545.49	0
	chr1	153498678	153498898	S100A6	9820	94.4	52.61	0
	chr1	153540036	153540256	S100A2	1730	165	110.39	0
	chr1	154169477	154169697	MIR190B	3258	54	25.78	6.19e-181
	chr1	154363879	154364099	IL6R	13571	44.1	29.51	2.26e-156
	chr1	154446037	154446257	SHE	28270	16	26.75	2.96e-55
	chr1	154786039	154786259	KCNN3	56496	120.6	100.81	0
	chr1	154832416	154832636	KCNN3	10119	31.8	35.46	1.68e-121
	chr1	154976301	154976521	ZBTB7B	1195	67.3	45.03	1.01e-278
	chr1	155411615	155411835	POU5F1P4	8644	76.6	51.26	0
	chr1	155516296	155516516	ASH1L-AS1	15257	104	69.6	0
	chr1	156093594	156093814	LMNA	9133	279.8	187.16	0
	chr1	156700959	156701179	RRNAD1	2696	25	41.73	3.4e-101
	chr1	157044032	157044252	ETV3L	25349	40.4	22.53	1.08e-128
	chr1	157071099	157071319	ETV3L	1499	18.5	30.86	6.35e-67
	chr1	158885995	158886215	PYHIN1	15123	98.4	329.18	0
	chr1	160031270	160031490	KCNJ10	8562	28.6	47.91	5.3e-121
	chr1	160384682	160384902	VANGL2	14318	31.1	26.01	7.61e-106
	chr1	161044516	161044736	ARHGAP30	4756	88.6	49.38	0
	chr1	161074414	161074634	KLHDC9	6233	26.4	44.09	2.31e-109
	chr1	161443220	161443440	FCGR2A	31766	26.2	175.17	1.86e-159
	chr1	161451602	161451822	FCGR2A	23384	29.7	24.84	8.21e-99
	chr1	161661760	161661980	RPL31P11	6718	105.1	58.59	0
	chr1	161936794	161937014	OLFML2B	56631	29.9	24.98	8.21e-99
	chr1	162064279	162064499	MIR4654	62399	134.1	448.5	0
	chr1	162515201	162515421	UAP1	15876	35.5	59.37	9.76e-161
	chr1	162883216	162883436	C1orf110	44611	46.2	77.3	1.01e-226
	chr1	163252256	163252476	RGS5	39106	22.8	38.21	5.57e-90
	chr1	163793371	163793591	LOC100422212	400390	52	34.8	1.57e-195
	chr1	164680847	164681067	LOC100505795	62812	33.6	112.27	1.88e-183
	chr1	164755439	164755659	LOC100505795	11561	22.3	37.33	7.94e-87
	chr1	165297869	165298089	LMX1A	27390	45.9	51.14	2.53e-198
	chr1	165827698	165827918	UCK2	30966	103.9	347.4	0
	chr1	166172559	166172779	FAM78B	36601	53.4	89.35	8.41e-273
	chr1	166315390	166315610	FAM78B	179432	33	36.84	9.8e-128
	chr1	166839812	166840032	TADA1	5623	29	32.33	3.3e-106
	chr1	166992410	166992630	MAEL	47591	25.1	42.03	8.09e-103
	chr1	167542355	167542575	CREG1	19299	72.9	121.97	0
	chr1	167955313	167955533	MPC2	49006	74.7	124.91	0
	chr1	168961055	168961275	LINC00970	94969	366.4	175.09	0
	chr1	169172217	169172437	ATP1B1	96270	81.5	54.55	0
	chr1	169553808	169554028	F5	1742	135.7	64.83	0
	chr1	170338754	170338974	LINC01142	85405	31.3	52.32	2.72e-136
	chr1	170376886	170377106	LINC01142	123537	19.3	32.33	2.03e-71
	chr1	170594602	170594822	PRRX1	38492	26.5	44.38	2.31e-109
	chr1	170618871	170619091	PRRX1	14223	24.4	27.24	3.95e-84
	chr1	171193456	171193676	FMO1	23935	26.5	22.19	9.9e-84
	chr1	171291348	171291568	FMO4	7862	75.6	28.08	1.84e-261
	chr1	171553089	171553309	MYOC	68465	26.2	87.58	1.77e-133
	chr1	171554937	171555157	MYOC	66617	32	35.66	1.68e-121
	chr1	171723607	171723827	VAMP4	12228	54.1	45.26	4.84e-225
	chr1	171853758	171853978	DNM3	43140	37.4	125.2	1.97e-210
	chr1	171871757	171871977	DNM3	61139	86.1	41.15	0
	chr1	172176212	172176432	DNM3OS	62237	114.8	95.96	0
	chr1	172345763	172345983	C1orf105	43846	107	59.66	0
	chr1	172392584	172392804	C1orf105	2756	301.6	252.17	0
	chr1	172445442	172445662	PIGC	32212	210.2	234.34	0
	chr1	173264989	173265209	TNFSF4	88518	36.2	24.22	3.27e-119
	chr1	173606471	173606691	LOC730159	1810	46.9	156.95	4.96e-277
	chr1	173611664	173611884	LOC730159	7003	50.8	56.63	5.11e-226
	chr1	174375683	174375903	GPR52	41310	137.1	45.85	0
	chr1	174567218	174567438	GPR52	150006	40.9	27.39	2.19e-140
	chr1	175191439	175191659	KIAA0040	29210	29.4	49.08	4.64e-126
	chr1	175500070	175500290	TNR	212463	62.7	104.93	0
	chr1	175705903	175706123	TNR	6630	27.2	22.78	8.68e-88
	chr1	175782999	175783219	TNR	70247	71.4	238.65	0
	chr1	177441740	177441960	LOC101928778	227700	42	28.1	3.72e-146
	chr1	177782473	177782693	LOC101928778	112814	76.6	64.07	0
	chr1	177883990	177884210	SEC16B	54841	57.6	38.56	3.1e-225
	chr1	178247329	178247549	RASAL2	63058	142.4	158.71	0
	chr1	179008247	179008467	FAM20B	13173	267.1	178.7	0
	chr1	179369158	179369378	AXDND1	34303	123.6	82.65	0
	chr1	180179194	180179414	FLJ23867	12050	92.1	61.6	0
	chr1	180468983	180469203	ACBD6	2820	77.7	37.12	4.83e-299
	chr1	180485272	180485492	ACBD6	13250	517.6	288.52	0
	chr1	180491218	180491438	ACBD6	19196	191	79.87	0
	chr1	180554707	180554927	XPR1	46220	179.6	85.82	0
	chr1	181068788	181069008	IER5	11150	365.2	135.72	0
	chr1	181104178	181104398	IER5	46540	2723.1	1138.45	0
	chr1	181491030	181491250	CACNA1E	38344	415.5	154.4	0
	chr1	181737379	181737599	CACNA1E	284693	73.8	123.44	0
	chr1	182115524	182115744	ZNF648	84677	142	94.99	0
	chr1	182612946	182613166	LOC284648	28671	296.1	165.08	0
	chr1	182730592	182730812	NPL	27773	975.2	815.45	0
	chr1	182931834	182932054	SHCBP1L	9281	106.5	50.89	0
	chr1	183182107	183182327	LAMC2	26933	36.2	30.27	1.65e-130
	chr1	183739125	183739345	APOBEC4	116677	47.1	22.5	3.9e-149
	chr1	184581362	184581582	EDEM3	142460	120.2	57.44	0
	chr1	184961485	184961705	FAM129A	17767	49.6	55.25	4.96e-219
	chr1	185606261	185606481	LINC01350	8641	60.3	50.41	1.22e-258
	chr1	185877540	185877760	HMCN1	173857	37.3	31.15	5.68e-135
	chr1	185930860	185931080	HMCN1	227177	52.4	35.03	1.29e-198
	chr1	186708771	186708991	PTGS2	59212	125.8	140.29	0
	chr1	187231958	187232178	PLA2G4A	433926	56.1	93.76	1.87e-290
	chr1	187377392	187377612	PLA2G4A	579360	339	188.98	0
	chr1	187599855	187600075	PLA2G4A	801823	95.8	53.39	0
	chr1	187607928	187608148	PLA2G4A	809896	234.8	261.77	0
	chr1	189763878	189764098	BRINP3	682662	39.4	263.34	2.63e-262
	chr1	191679279	191679499	RGS18	448094	27.9	31.15	1.05e-101
	chr1	191870836	191871056	RGS18	256537	52	87	4.44e-263
	chr1	192870717	192870937	RGS2	92548	147.1	123	0
	chr1	194504552	194504772	B3GALT2	1348809	170.8	142.84	0
	chr1	194996025	194996245	MIR4735	1555367	21.4	23.9	4.59e-70
	chr1	195287773	195287993	MIR4735	1263619	41.1	68.77	4.77e-195
	chr1	196466236	196466456	MIR4735	85156	51.7	86.41	3.84e-261
	chr1	198315418	198315638	NEK7	189310	49.9	33.39	8.25e-185
	chr1	198392848	198393068	ATP6V1G3	117008	27.8	30.96	3.25e-100
	chr1	199878313	199878533	NR5A2	118198	96.7	35.92	0
	chr1	199918184	199918404	NR5A2	78327	461.5	308.72	0
	chr1	200196130	200196350	LINC00862	146571	58.5	27.96	2.27e-202
	chr1	200264365	200264585	LINC00862	78336	52.2	29.1	1e-183
	chr1	200289098	200289318	LINC00862	53603	90.2	100.52	0
	chr1	200811861	200812081	GPR25	30003	123.2	103.01	0
	chr1	201438192	201438412	PHLDA3	0	902.8	754.9	0
	chr1	201492365	201492585	RPS10P7	3333	85.6	40.9	0
	chr1	201956148	201956368	RNPEP	4382	28.8	48.2	1.1e-122
	chr1	202025774	202025994	ELF3	46084	535.7	255.95	0
	chr1	202206343	202206563	LGR6	43225	253.6	84.82	0
	chr1	202323449	202323669	UBE2T	12355	129.9	217.2	0
	chr1	202944940	202945160	CYB5R1	8536	74.2	41.34	4.69e-298
	chr1	202971698	202971918	LOC100506747	4476	371.9	155.48	0
	chr1	203063208	203063428	MYOG	8042	68.9	46.08	5.14e-287
	chr1	203220684	203220904	CHIT1	21824	106.2	88.76	0
	chr1	203272665	203272885	LINC01136	1569	67.1	28.07	1.22e-232
	chr1	203275698	203275918	BTG2	1034	268.5	149.7	0
	chr1	204478586	204478806	MDM4	6702	304.6	169.78	0
	chr1	204494075	204494295	MDM4	8568	1220.1	582.95	0
	chr1	204983300	204983520	CNTN2	28821	99.8	111.29	0
	chr1	205604947	205605167	ELK4	2947	70.3	47.03	2.34e-295
	chr1	206264917	206265137	C1orf186	23511	37.6	125.79	1.97e-210
	chr1	206656037	206656257	MIR6769B	7891	34.6	57.9	1.96e-155
	chr1	206820522	206820742	DYRK3	11641	155.2	519.04	0
	chr1	206952404	206952624	IL10	6565	35.1	29.39	1.32e-124
	chr1	206999974	207000194	IL19	2029	185.8	56.48	0
	chr1	207047200	207047420	IL20	8046	49.9	33.39	8.25e-185
	chr1	207135124	207135344	FCAMR	8627	409.8	137.08	0
	chr1	207414092	207414312	CD55	80506	200.9	95.98	0
	chr1	207880745	207880965	CD46	44419	560.8	375.14	0
	chr1	208259451	208259671	PLXNA2	157995	11.4	38.21	7.22e-46
	chr1	208387141	208387361	PLXNA2	30305	93.7	104.44	0
	chr1	208392727	208392947	PLXNA2	24719	36	120.5	5.55e-200
	chr1	208669915	208670135	PLXNA2	252250	15.6	52.32	4.65e-69
	chr1	209291197	209291417	MIR205HG	310752	18.5	61.72	7.37e-85
	chr1	209402902	209403122	MIR205HG	199047	21.1	70.54	3.12e-101
	chr1	209557304	209557524	MIR205HG	44645	84.2	93.85	0
	chr1	209585063	209585283	MIR205HG	16886	127.9	213.97	0
	chr1	209604415	209604635	MIR205	844	28.5	95.23	3.6e-149
	chr1	209989859	209990079	IRF6	10339	23.6	157.53	1.77e-139
	chr1	210494932	210495152	HHAT	6445	232.3	777.09	0
	chr1	210585081	210585301	HHAT	83485	76.5	255.7	0
	chr1	211668937	211669157	RD3	2678	93.7	52.22	0
	chr1	211750616	211750836	SLC30A1	1264	91.7	76.71	0
	chr1	212101544	212101764	LPGAT1	97430	49.9	83.47	1.42e-249
	chr1	212676186	212676406	NENF	69957	77.7	86.61	0
	chr1	212769799	212770019	ATF3	11952	409.7	342.55	0
	chr1	214612870	214613090	PTPN14	111935	521.6	872.32	0
	chr1	215175087	215175307	KCNK2	81254	173.5	64.46	0
	chr1	216788664	216788884	USH2A	191926	40.1	26.8	1.61e-137
	chr1	218774445	218774665	LOC728463	255425	630.6	301.3	0
	chr1	218807572	218807792	LOC728463	288552	55.2	36.91	1.27e-212
	chr1	219759229	219759449	RNU5F-1	287171	162.2	108.51	0
	chr1	220509786	220510006	RAB3GAP2	63943	148.9	99.58	0
	chr1	221345999	221346219	C1orf140	163420	13.5	22.63	4.16e-44
	chr1	222157975	222158195	DUSP10	242457	31.1	52.02	2.72e-136
	chr1	222340559	222340779	HHIPL2	380666	28.1	47.03	2.52e-119
	chr1	222979262	222979482	DISP1	8950	100.2	167.53	0
	chr1	223221498	223221718	TLR5	94907	64.9	216.9	0
	chr1	223595112	223595332	CCDC185	28397	98.6	164.88	0
	chr1	223895847	223896067	CAPN2	4053	212	141.78	0
	chr1	225047351	225047571	DNAH14	69786	14.8	98.75	1.77e-78
	chr1	225375353	225375573	LBR	240985	45.3	303.31	2.46e-311
	chr1	225582606	225582826	LBR	33732	13.2	22.04	9.37e-43
	chr1	225813259	225813479	ENAH	27367	42	70.24	1.42e-200
	chr1	226008586	226008806	EPHX1	10810	172.4	192.22	0
	chr1	226014120	226014340	EPHX1	16344	53.8	89.94	9.4e-275
	chr1	226402261	226402481	MIXL1	8839	25.1	84.06	1.12e-127
	chr1	226667310	226667530	C1orf95	68972	259.9	217.35	0
	chr1	227911281	227911501	LOC100130093	4740	96.5	80.68	0
	chr1	227975625	227975845	PRSS38	27574	23.7	79.36	4.16e-118
	chr1	229173881	229174101	RAB4A	232709	53.8	59.96	1.15e-243
	chr1	229374429	229374649	RAB4A	32161	39.4	43.89	1.91e-161
	chr1	230763601	230763821	COG2	14382	177	295.97	0
	chr1	231307455	231307675	TRIM67	8781	80.3	44.77	0
	chr1	232266657	232266877	DISC2	312394	83.1	556.07	0
	chr1	232458095	232458315	SIPA1L2	192929	10.5	35.27	3.66e-41
	chr1	232842971	232843191	LOC101927683	35271	26	173.99	3.24e-157
	chr1	232855075	232855295	LOC101927683	23167	29.5	98.75	3.94e-155
	chr1	232884694	232884914	LOC101927683	6233	40.1	268.04	1.4e-269
	chr1	233088715	233088935	NTPCR	2345	165.9	184.97	0
	chr1	233315430	233315650	PCNXL2	115810	267.7	1790.49	0
	chr1	233343738	233343958	PCNXL2	87502	14.6	97.58	1.74e-76
	chr1	233800575	233800795	MIR4427	40677	43.2	72.3	5.51e-208
	chr1	233844206	233844426	MIR4427	84308	42.4	70.83	2.02e-202
	chr1	234387405	234387625	MIR4671	54589	16.2	54.08	1.62e-72
	chr1	234528944	234529164	COA6	19730	129	107.86	0
	chr1	234700464	234700684	LINC01354	32939	33.4	22.34	1.54e-105
	chr1	234754222	234754442	IRF2BP2	8951	589.3	492.74	0
	chr1	234835939	234836159	LINC01132	23631	35.7	39.78	5.49e-142
	chr1	234872202	234872422	LINC01132	12413	53.3	89.05	8.41e-273
	chr1	235511583	235511803	TBCE	18873	87.9	146.95	0
	chr1	235833301	235833521	GNG4	19247	127.2	425.58	0
	chr1	235838434	235838654	GNG4	24380	188.9	210.63	0
	chr1	236096434	236096654	LYST	49426	105.6	70.66	0
	chr1	238096207	238096427	ZP4	41985	5.98	39.97	9.51e-24
	chr1	238262445	238262665	ZP4	208223	3.87	25.86	3.09e-13
	chr1	238483363	238483583	LINC01139	165735	17.4	116.39	8.95e-97
	chr1	239869978	239870198	CHRM3-AS2	12222	22	24.49	7.85e-73
	chr1	239965123	239965343	CHRM3-AS2	82704	21.8	24.3	1.91e-71
	chr1	241100252	241100472	MIR3123	195101	52.5	58.59	1.41e-236
	chr1	241236020	241236240	MIR3123	59333	20.6	68.77	1.51e-97
	chr1	241751249	241751469	CHML	47764	19.2	32.04	2.03e-71
	chr1	241852143	241852363	WDR64	36563	29.5	32.92	3.12e-109
	chr1	241962197	241962417	EXO1	49077	13.9	46.44	6.83e-59
	chr1	242363486	242363706	MAP1LC3C	201101	159.8	534.33	0
	chr1	243617718	243617938	MIR4677	108240	26.2	29.19	7.91e-93
	chr1	244402788	244403008	C1orf100	112930	322.3	1078.06	0
	chr1	244898810	244899030	DESI2	82458	383.1	427.15	0
	chr1	245475437	245475657	KIF26B	157150	12.7	84.65	9.82e-65
	chr1	245653148	245653368	KIF26B	334861	104	173.99	0
	chr1	245803058	245803278	KIF26B	484771	23.7	26.45	2.85e-81
	chr1	245873343	245873563	KIF26B	555056	16.7	55.84	2.95e-74
	chr1	246112414	246112634	SMYD3	558011	17.4	29.1	1.72e-62
	chr1	246164518	246164738	SMYD3	505907	103.2	345.05	0
	chr1	247112653	247112873	AHCTF1	17927	52	173.99	1.00e-314
	chr1	247276528	247276748	C1orf229	809	34.3	38.21	4.95e-134
	chr1	247697978	247698198	OR2C3	837	19	126.97	3.32e-107
	chr1	247759090	247759310	OR2G2	7428	67	223.96	0
	chr10	81687	81907	TUBB8	13272	4.22	28.22	4.25e-16
	chr10	419521	419741	ZMYND11	239097	114.6	63.88	0
	chr10	566442	566662	MIR5699	121057	47.8	22.84	7.6e-152
	chr10	1332313	1332533	LINC00200	126605	42.7	28.57	4.65e-149
	chr10	1767223	1767443	ADARB2	12228	156.2	130.64	0
	chr10	2159967	2160187	MIR6072	41684	39.5	26.45	1.15e-134
	chr10	2326366	2326586	LINC00701	30683	28.6	95.81	3.6e-149
	chr10	4775382	4775602	LINC00704	55120	39.5	66.13	6.69e-186
	chr10	4953358	4953578	AKR1C6P	4888	69.2	77.2	0
	chr10	4960500	4960720	AKR1C6P	2035	42	46.83	2.37e-176
	chr10	5538588	5538808	CALML5	2726	28.3	23.66	6.9e-92
	chr10	5835873	5836093	GDI2	19420	73.8	82.29	0
	chr10	6615427	6615647	PRKCQ	6617	56.4	62.9	9.38e-260
	chr10	7033519	7033739	LINC00707	211959	67.7	113.15	0
	chr10	8744934	8745154	LINC00708	434666	81.7	34.17	9.01e-306
	chr10	8806181	8806401	LINC00708	495913	227.8	190.45	0
	chr10	8810405	8810625	LINC00708	500137	46.9	26.16	8.5e-158
	chr10	9230607	9230827	LINC00709	86750	253.8	84.88	0
	chr10	9867439	9867659	LINC00709	549863	50.8	42.47	2.46e-205
	chr10	10780326	10780546	SFTA1P	56332	30.2	33.7	8.41e-114
	chr10	11113736	11113956	CELF2-AS2	33496	76.3	85.04	0
	chr10	11880383	11880603	PROSER2	14986	25.8	28.8	2.29e-91
	chr10	12647815	12648035	MIR4480	27063	27.2	45.56	2.53e-114
	chr10	12673235	12673455	MIR4480	52483	134.4	224.84	0
	chr10	12976798	12977018	LOC283070	101665	17.6	58.78	1.59e-79
	chr10	13170593	13170813	OPTN	28511	40.6	135.79	1.38e-231
	chr10	13571685	13571905	BEND7	26709	37.6	25.16	8.76e-125
	chr10	13800424	13800644	PRPF18	171485	196.5	164.29	0
	chr10	13913038	13913258	PRPF18	284099	73.1	244.53	0
	chr10	14034104	14034324	FRMD4A	338543	29.9	24.98	8.21e-99
	chr10	14690999	14691219	FAM107B	44582	34.3	28.66	3.22e-120
	chr10	15072425	15072645	OLAH	13251	21.4	23.9	4.59e-70
	chr10	15165966	15166186	C10orf111	26648	347.5	290.53	0
	chr10	15214545	15214765	NMT2	3850	40.2	67.31	1.5e-189
	chr10	16076640	16076860	FAM188A	174121	16	106.98	1.58e-86
	chr10	16238937	16239157	PTER	239786	97.7	326.83	0
	chr10	17289386	17289606	VIM-AS1	17402	188.4	315.07	0
	chr10	18408729	18408949	CACNB2	20658	19.9	22.14	2.96e-63
	chr10	18796885	18797105	NSUN6	143446	43.2	72.3	5.51e-208
	chr10	18916670	18916890	NSUN6	23661	22.8	38.21	5.57e-90
	chr10	21716771	21716991	MIR1915	68580	348.7	583.11	0
	chr10	21889925	21890145	MLLT10	66824	29.5	98.75	3.94e-155
	chr10	24545017	24545237	MIR603	19378	384.4	428.52	0
	chr10	24577834	24578054	MIR603	13220	211.3	176.64	0
	chr10	24813008	24813228	KIAA1217	57574	29.5	24.69	2.03e-97
	chr10	25045299	25045519	ARHGAP21	32702	120.9	101.1	0
	chr10	26712694	26712914	APBB1IP	14353	70.8	29.61	3.72e-250
	chr10	28154216	28154436	MKX	119438	141.8	118.59	0
	chr10	28616495	28616715	MIR8086	38216	18.6	31.15	2.05e-68
	chr10	28901054	28901274	BAMBI	65151	71.9	34.35	1.54e-269
	chr10	29258823	29259043	C10orf126	123486	87.9	58.78	0
	chr10	29381220	29381440	LYZL1	196551	98.1	54.67	0
	chr10	29733163	29733383	LOC102724316	34700	56.2	37.62	6.54e-219
	chr10	29865515	29865735	MIR938	25541	42	46.83	2.37e-176
	chr10	30215656	30215876	KIAA1462	132613	65.4	72.89	1.10e-314
	chr10	30240717	30240937	KIAA1462	107552	28.6	31.94	1.06e-104
	chr10	30519174	30519394	MTPAP	118874	187	1250.87	0
	chr10	30679287	30679507	MIR7162	21693	21.6	36.15	1.07e-83
	chr10	31372736	31372956	ZNF438	51870	33.7	37.62	7.09e-131
	chr10	31583531	31583751	ZEB1-AS1	24274	56.4	62.9	9.38e-260
	chr10	32177155	32177375	ARHGAP12	40430	32.3	27.04	1.51e-111
	chr10	32359609	32359829	KIF5B	14238	82.4	275.69	0
	chr10	33993464	33993684	LINC00838	67925	98.4	164.59	0
	chr10	35194983	35195203	PARD3-AS1	90287	59.8	49.96	3.06e-255
	chr10	36110226	36110446	PCAT5	42996	71.4	39.78	5.68e-282
	chr10	36176704	36176924	PCAT5	109474	57.3	63.88	3.69e-265
	chr10	36263826	36264046	PCAT5	196596	107.4	59.86	0
	chr10	36344824	36345044	PCAT5	277594	52.4	87.58	5.83e-267
	chr10	36362795	36363015	PCAT5	295565	42.5	35.56	2.17e-162
	chr10	37573196	37573416	LINC00993	24699	99.3	110.71	0
	chr10	37707865	37708085	LINC00993	109751	42	46.83	2.37e-176
	chr10	38293058	38293278	ZNF33A	6301	16.3	54.67	1.62e-72
	chr10	38297024	38297244	ZNF33A	2335	262.6	292.73	0
	chr10	38645718	38645938	HSD17B7P2	410	30.6	25.57	5.1e-103
	chr10	42686907	42687127	LOC441666	176367	23.9	159.89	1.12e-141
	chr10	43136372	43136592	ZNF33B	2380	163.4	109.33	0
	chr10	43521653	43521873	MIR5100	28642	156.9	174.97	0
	chr10	43956618	43956838	ZNF487	24044	24.4	27.24	3.95e-84
	chr10	44408232	44408452	LINC00841	3480	147.3	82.1	0
	chr10	44695454	44695674	LOC100130539	92525	13.7	22.92	4.16e-44
	chr10	44930680	44930900	CXCL12	50135	73.8	82.29	0
	chr10	45933897	45934117	ALOX5	64273	912.8	436.16	0
	chr10	48342817	48343037	ZNF488	12053	365.9	174.83	0
	chr10	49459674	49459894	FRMPD2	23048	219.2	244.34	0
	chr10	49625486	49625706	MAPK8	15831	225.8	377.67	0
	chr10	49684488	49684708	MAPK8	74833	30.8	102.87	3.86e-163
	chr10	49797539	49797759	ARHGAP22	66552	54.7	182.81	0
	chr10	49935306	49935526	WDFY4	41788	62.7	209.85	0
	chr10	49946004	49946224	WDFY4	52486	22.7	37.91	2.12e-88
	chr10	49996711	49996931	WDFY4	103193	23.2	25.86	1.95e-78
	chr10	50156754	50156974	LRRC18	34474	129.2	86.41	0
	chr10	50575711	50575931	DRGX	28132	24.4	163.41	4.33e-146
	chr10	50784144	50784364	SLC18A3	33984	19.5	32.62	6.24e-73
	chr10	51518189	51518409	MSMB	31145	28.3	23.66	6.9e-92
	chr10	52081940	52082160	ASAH2	73570	65.6	219.26	0
	chr10	54040855	54041075	PRKG1-AS1	32814	27.6	23.07	3.77e-89
	chr10	54203300	54203520	DKK1	129259	210.4	100.52	0
	chr10	54501749	54501969	MBL2	29492	98.1	109.33	0
	chr10	54634161	54634381	MBL2	102701	32.3	108.16	2.8e-175
	chr10	55379541	55379761	MBL2	848081	162	541.97	0
	chr10	55426909	55427129	MBL2	895449	16.3	27.33	1.1e-56
	chr10	58343134	58343354	ZWINT	222100	99.1	165.76	0
	chr10	58505287	58505507	ZWINT	384253	62.4	208.67	0
	chr10	58562958	58563178	ZWINT	441924	26.2	87.58	1.77e-133
	chr10	59045267	59045487	MIR3924	18833	34.1	57.02	1.12e-153
	chr10	59383915	59384135	MIR3924	319596	140.6	156.75	0
	chr10	59572046	59572266	IPMK	455429	36	40.17	1.37e-143
	chr10	59949115	59949335	IPMK	78360	16.9	28.22	1.42e-59
	chr10	61062957	61063177	FAM13C	59176	53.1	35.5	1.03e-201
	chr10	61097063	61097283	FAM13C	25070	151	126.23	0
	chr10	61725270	61725490	C10orf40	4599	108.4	72.54	0
	chr10	62188517	62188737	ANK3	287743	112.1	93.76	0
	chr10	62247942	62248162	CDK1	289928	126	210.73	0
	chr10	62254680	62254900	CDK1	283190	85.8	95.62	0
	chr10	62520540	62520760	CDK1	17330	636.9	2130.25	0
	chr10	62678684	62678904	RHOBTB1	25130	20.7	34.68	4.81e-79
	chr10	63648265	63648485	MIR548AV	87577	38.1	63.78	7.76e-177
	chr10	64096229	64096449	ZNF365	37468	41.1	137.55	7.39e-236
	chr10	65772208	65772428	REEP3	491085	7.21	48.2	5.83e-32
	chr10	66995714	66995934	ANXA2P3	410429	30.1	100.52	3.98e-159
	chr10	67179093	67179313	ANXA2P3	593808	329.7	220.55	0
	chr10	67375126	67375346	ANXA2P3	789841	108.1	120.5	0
	chr10	69431058	69431278	CTNNA3	5615	5.98	39.97	9.51e-24
	chr10	70194507	70194727	RUFY2	27456	14.9	49.96	6.17e-64
	chr10	70368469	70368689	TET1	48352	10.4	34.68	1.28e-39
	chr10	71100595	71100815	HK1	21992	19.9	66.42	6.86e-94
	chr10	71360825	71361045	NEUROG3	27615	34.4	57.61	1.96e-155
	chr10	72836882	72837102	UNC5B	135191	52.9	353.87	0
	chr10	73060779	73060999	SLC29A3	18012	49.9	83.47	1.42e-249
	chr10	73272632	73272852	SLC29A3	193622	268.2	179.4	0
	chr10	73480818	73481038	C10orf105	1240	30.2	50.55	3.71e-131
	chr10	73627960	73628180	PSAP	16878	28.5	23.81	2.9e-93
	chr10	73690551	73690771	CHST3	33350	90.2	150.78	0
	chr10	73715071	73715291	CHST3	8830	24.6	82.29	7.83e-124
	chr10	74030429	74030649	DDIT4	3029	38	63.48	4.93e-175
	chr10	74058020	74058240	DDIT4	24343	433.6	241.69	0
	chr10	75635883	75636103	CAMK2G	1534	28.8	32.13	3.3e-106
	chr10	75647558	75647778	CAMK2G	13209	159.1	88.66	0
	chr10	75742953	75743173	VCL	14700	22.3	74.65	1.13e-108
	chr10	76839601	76839821	DUPD1	21329	42.4	47.22	5.04e-178
	chr10	76901891	76902111	SAMD8	30498	40.1	268.04	1.4e-269
	chr10	79221514	79221734	KCNMA1	175844	61	407.94	0
	chr10	79419150	79419370	KCNMA1	21573	132.3	221.31	0
	chr10	79482839	79483059	KCNMA1	85262	74.3	82.88	0
	chr10	79568615	79568835	DLG5	117514	13.9	92.88	1.57e-72
	chr10	79658386	79658606	DLG5	27743	120.6	134.41	0
	chr10	80218773	80218993	LINC00595	191688	60.3	50.41	1.22e-258
	chr10	80679847	80680067	ZMIZ1-AS1	147139	113.4	126.38	0
	chr10	80707661	80707881	ZMIZ1-AS1	119325	39.5	66.13	6.69e-186
	chr10	80812554	80812774	ZMIZ1-AS1	14432	37.4	41.73	1.18e-151
	chr10	80859780	80860000	ZMIZ1	30988	64.3	107.57	0
	chr10	80997565	80997785	PPIF	109436	44.3	148.13	1.45e-259
	chr10	81020632	81020852	PPIF	86369	36	24.1	7.9e-118
	chr10	81344981	81345201	SFTPA2	24818	20.9	139.9	6e-120
	chr10	81780089	81780309	TMEM254	58094	39.7	132.85	3.31e-225
	chr10	82189506	82189726	FAM213A	21921	40.1	33.51	4.49e-150
	chr10	82230876	82231096	TSPAN14	16838	109	91.11	0
	chr10	82248354	82248574	TSPAN14	34316	43.1	36	1.69e-165
	chr10	82378901	82379121	SH2D4B	81243	101.6	113.25	0
	chr10	82507300	82507520	SH2D4B	209642	129.9	434.4	0
	chr10	82565155	82565375	SH2D4B	267497	46	51.34	4.92e-200
	chr10	82937793	82938013	SH2D4B	640135	160.3	268.04	0
	chr10	83067117	83067337	NRG3	567734	64.1	429.11	0
	chr10	83204052	83204272	NRG3	430799	75.4	50.43	4.94e-324
	chr10	84452346	84452566	NRG3	817276	41.7	46.44	1.11e-174
	chr10	84833905	84834125	GHITM	1065061	46.4	77.59	1.31e-228
	chr10	85743473	85743693	GHITM	155493	358.4	299.64	0
	chr10	86284898	86285118	CCSER2	196553	192.1	214.16	0
	chr10	87307954	87308174	GRID1-AS1	29315	104	69.6	0
	chr10	87954121	87954341	MIR346	70205	33.2	111.1	2.11e-181
	chr10	87980264	87980484	MIR346	44062	72.6	48.55	4.1e-307
	chr10	88513865	88514085	BMPR1A	2312	15.8	26.45	7.85e-54
	chr10	88534996	88535216	BMPR1A	18600	43.1	48.01	4.65e-183
	chr10	88728217	88728437	ADIRF	29	31.1	26.01	7.61e-106
	chr10	88873506	88873726	FAM35A	18553	37.8	31.6	5.77e-138
	chr10	89525536	89525756	ATAD1	52162	9.14	30.57	1.43e-33
	chr10	89602921	89603141	KLLN	20054	453.3	303.2	0
	chr10	89738813	89739033	PTEN	115618	56.2	37.62	6.54e-219
	chr10	89851486	89851706	PTEN	228291	19.2	32.04	2.03e-71
	chr10	90020544	90020764	RNLS	322319	322.1	538.73	0
	chr10	90750963	90751183	ACTA2	0	161	269.22	0
	chr10	91001575	91001795	LIPA	10002	57.3	383.26	0
	chr10	91035214	91035434	LIPA	23418	23.4	39.09	3.71e-93
	chr10	91404919	91405139	PANK1	191	74.9	62.6	0
	chr10	91811358	91811578	LOC101926924	94228	63.3	211.61	0
	chr10	92737206	92737426	ANKRD1	56174	79.6	133.14	0
	chr10	92998083	92998303	PCGF5	17724	45.3	50.55	6.53e-195
	chr10	93026631	93026851	PCGF5	46272	25.5	170.47	5.57e-155
	chr10	93111061	93111281	HECTD2	58762	73.5	122.85	0
	chr10	93286118	93286338	LOC100188947	84880	18.8	125.79	4.18e-105
	chr10	93390474	93390694	PPP1R3C	2165	37.4	41.73	1.18e-151
	chr10	94089889	94090109	MARCH5	38969	107.4	359.16	0
	chr10	94897966	94898186	CYP26A1	64734	141	235.71	0
	chr10	94910067	94910287	CYP26A1	76835	20.6	34.39	1.66e-77
	chr10	95194840	95195060	MYOF	47015	56.2	62.7	9.38e-260
	chr10	95522956	95523176	LGI1	5390	25.5	28.41	6.58e-90
	chr10	96346079	96346299	HELLS	40555	44.8	29.98	2.56e-159
	chr10	96494472	96494692	CYP2C19	27772	77.3	86.21	0
	chr10	96747985	96748205	CYP2C9	49570	54.1	45.26	4.84e-225
	chr10	97054875	97055095	PDLIM1	3970	77.2	129.03	0
	chr10	97099034	97099254	PDLIM1	48129	183.3	306.55	0
	chr10	98040659	98040879	BLNK	9386	15.1	25.28	5.21e-51
	chr10	98421445	98421665	PIK3AP1	58615	10.7	35.86	3.66e-41
	chr10	98457232	98457452	PIK3AP1	22828	12.3	41.15	1.13e-50
	chr10	98602927	98603147	LCOR	10910	43.1	36	1.69e-165
	chr10	98616275	98616495	LCOR	24258	46.7	31.27	1.02e-169
	chr10	98896441	98896661	LOC100505540	33928	78.9	43.99	1.68e-322
	chr10	99172695	99172915	RRP12	11568	21.8	36.44	1.07e-83
	chr10	99309833	99310053	ANKRD2	22146	196	218.47	0
	chr10	99313198	99313418	ANKRD2	18781	19	31.74	6.5e-70
	chr10	99411581	99411801	PI4K2A	11138	271.7	454.38	0
	chr10	100025208	100025428	LOXL4	2580	91	60.9	0
	chr10	100768926	100769146	HPSE2	226487	183.7	102.38	0
	chr10	101414579	101414799	ENTPD7	4465	100	334.47	0
	chr10	101416451	101416671	ENTPD7	2593	37.4	41.73	1.18e-151
	chr10	101803192	101803412	DNMBP	33516	238.8	159.77	0
	chr10	102045789	102046009	BLOC1S2	461	132.5	147.74	0
	chr10	102416265	102416485	PAX2	88984	106.7	178.4	0
	chr10	102420800	102421020	PAX2	84449	33.9	28.36	9.17e-119
	chr10	102598428	102598648	FAM178A	73679	31.3	34.88	2.08e-118
	chr10	102769410	102769630	LZTS2	12546	25.5	28.41	6.58e-90
	chr10	102981396	102981616	LBX1	7102	175.7	146.95	0
	chr10	103067896	103068116	BTRC	45675	17.6	29.39	1.72e-62
	chr10	103318037	103318257	POLL	29771	42.2	47.03	5.04e-178
	chr10	103650047	103650267	KCNIP2	46370	61	40.79	8.27e-243
	chr10	103872961	103873181	LDB1	1543	25.3	42.32	8.09e-103
	chr10	104317686	104317906	SUFU	53967	31.6	52.9	5.17e-138
	chr10	104459934	104460154	ARL3	14037	22.3	149.31	9.71e-131
	chr10	104480119	104480339	SFXN2	5821	90.7	303.31	0
	chr10	104529658	104529878	WBP1L	25931	29	96.99	3.75e-151
	chr10	104745631	104745851	CNNM2	67556	23.7	39.68	9.38e-95
	chr10	104802099	104802319	CNNM2	124024	54.5	91.11	1.27e-280
	chr10	104874728	104874948	NT5C2	78116	52.2	87.29	5.1e-265
	chr10	105584065	105584285	SH3PXD2A	30880	48.3	161.65	4.88e-288
	chr10	105639196	105639416	SH3PXD2A	24032	37.6	125.79	1.97e-210
	chr10	105845590	105845810	COL17A1	0	37.6	31.45	1.82e-136
	chr10	106227656	106227876	CCDC147	114134	30.4	33.9	8.41e-114
	chr10	106569066	106569286	SORCS3-AS1	143092	77.5	51.85	0
	chr10	106970386	106970606	SORCS3-AS1	544412	49.2	41.15	3.12e-197
	chr10	107220566	107220786	SORCS3-AS1	794592	19.3	32.33	2.03e-71
	chr10	107711965	107712185	SORCS1	1212282	97.9	327.41	0
	chr10	108199235	108199455	SORCS1	725012	39.4	32.92	1.65e-145
	chr10	109345376	109345596	SORCS1	420910	113.5	189.86	0
	chr10	109754448	109754668	SORCS1	829982	21.4	71.71	4.39e-103
	chr10	109799672	109799892	SORCS1	875206	222.3	148.72	0
	chr10	111935248	111935468	MXI1	34522	47.6	79.65	3.4e-236
	chr10	111977073	111977293	MXI1	7084	63.6	70.93	1.51e-303
	chr10	112816835	112817055	ADRA2A	19736	69.9	77.98	0
	chr10	114475932	114476152	MIR4295	82003	125	52.24	0
	chr10	114484325	114484545	MIR4295	90396	38	42.32	2.82e-153
	chr10	114827378	114827598	TCF7L2	117369	48.3	40.41	2.11e-192
	chr10	115100952	115101172	HABP2	209419	14.2	23.81	7.68e-47
	chr10	115129156	115129376	HABP2	181215	20.6	68.77	1.51e-97
	chr10	116308469	116308689	ABLIM1	21784	25.5	28.41	6.58e-90
	chr10	117879004	117879224	GFRA1	153903	19.7	32.92	6.24e-73
	chr10	118005569	118005789	GFRA1	27338	48.5	32.45	9.67e-179
	chr10	118394073	118394293	PNLIPRP2	13608	104.7	116.78	0
	chr10	118537255	118537475	HSPA12A	35170	42.9	286.85	1.41e-291
	chr10	118976433	118976653	KCNK18	19433	103	86.12	0
	chr10	119316497	119316717	EMX2OS	11918	19	31.74	6.5e-70
	chr10	119813959	119814179	CASC2	7627	66.6	37.13	1.28e-256
	chr10	120010077	120010297	FAM204A	91543	26.7	44.67	5.19e-111
	chr10	120387446	120387666	PRLHR	32286	24.4	40.85	5.79e-98
	chr10	120756230	120756450	NANOS1	32779	62.2	69.36	3.65e-296
	chr10	120763259	120763479	NANOS1	25750	253.1	120.92	0
	chr10	121084680	121084900	MIR4681	52585	106.3	355.63	0
	chr10	122155782	122156002	PPAPDC1A	60465	64.9	54.23	2.07e-284
	chr10	122263913	122264133	PPAPDC1A	47447	113.5	189.86	0
	chr10	122938587	122938807	WDR11-AS1	327896	9.49	31.74	4.62e-35
	chr10	123370536	123370756	FGFR2	12564	149.2	166.35	0
	chr10	124863530	124863750	HMX3	31818	44.6	74.65	2.57e-217
	chr10	124889028	124889248	HMX3	6320	54.8	61.13	8.6e-251
	chr10	125205011	125205231	GPR26	220641	59.4	49.67	1.52e-253
	chr10	125298460	125298680	GPR26	127192	196.3	328.3	0
	chr10	125481347	125481567	GPR26	55476	30.2	33.7	8.41e-114
	chr10	125725154	125725374	CPXM2	73654	23.7	39.68	9.38e-95
	chr10	125828398	125828618	CHST15	24506	61.5	68.58	1.2e-290
	chr10	126729695	126729915	MIR4296	8256	41.5	138.72	5.36e-238
	chr10	126776200	126776420	MIR4296	54761	126.5	211.61	0
	chr10	126985252	126985472	CTBP2	135628	57.3	38.33	1.19e-223
	chr10	127141727	127141947	TEX36-AS1	120994	20.9	139.9	6e-120
	chr10	127656217	127656437	FANK1-AS1	5406	378.4	1265.57	0
	chr10	128157015	128157235	LINC00601	46567	19.3	32.33	2.03e-71
	chr10	128842544	128842764	FAM196A	151659	47.8	39.97	3.4e-189
	chr10	129373093	129373313	NPS	25480	61.7	206.32	0
	chr10	129661525	129661745	CLRN3	29467	524.3	350.69	0
	chr10	129738095	129738315	CLRN3	46884	77.5	259.23	0
	chr10	130318762	130318982	MKI67	394294	21.3	35.56	3.86e-82
	chr10	131517014	131517234	MIR4297	124405	153.8	257.17	0
	chr10	132188288	132188508	GLRX3	253649	72.4	48.44	4.1e-307
	chr10	132606662	132606882	MIR378C	154050	13.9	92.88	1.57e-72
	chr10	132893015	132893235	MIR378C	132084	406.3	1359.03	0
	chr10	132897354	132897574	MIR378C	136423	13.7	22.92	4.16e-44
	chr10	133609880	133610100	LINC01164	12436	201.1	336.23	0
	chr10	133829321	133829541	BNIP3	33886	343.8	229.95	0
	chr10	134195190	134195410	PWWP2B	15293	111.4	124.23	0
	chr10	134237866	134238086	C10orf91	20629	82.6	34.53	2.22e-310
	chr10	134485537	134485757	NKX6-2	113781	35.7	23.87	1.9e-116
	chr10	134577217	134577437	NKX6-2	22101	35.9	29.98	1.5e-127
	chr10	134677008	134677228	NKX6-2	77471	225.7	1509.51	0
	chr10	135038997	135039217	UTF1	4562	35.3	118.15	7.92e-196
	chr10	135058561	135058781	MIR202	2344	58.9	196.92	0
	chr10	135513538	135513758	DUX4L3	26361	103.5	115.41	0
	chr11	283867	284087	ATHL1	5052	20	67.01	1.02e-95
	chr11	364363	364583	B4GALNT4	5213	27.1	22.63	1.98e-86
	chr11	439951	440171	ANO9	1841	27.9	93.46	3.21e-145
	chr11	706909	707129	EPS8L2	789	83.5	139.61	0
	chr11	804309	804529	PIDD1	722	104.4	349.16	0
	chr11	1073643	1073863	MUC2	1013	16.2	108.16	1.46e-88
	chr11	1108818	1109038	MUC2	33943	36.6	40.76	8.36e-147
	chr11	1410911	1411131	BRSK2	0	12.8	42.91	2.68e-52
	chr11	1468584	1468804	MOB2	33313	16.7	55.84	2.95e-74
	chr11	1676591	1676811	FAM99A	10019	124.1	207.5	0
	chr11	1851975	1852195	SYT8	3346	480.3	3213.01	0
	chr11	2589071	2589291	KCNQ1	106387	11.1	74.06	3.21e-55
	chr11	3271865	3272085	MRGPRE	18249	59.6	199.27	0
	chr11	3416829	3417049	OR7E12P	3684	17.2	115.21	1.04e-94
	chr11	3427653	3427873	OR7E12P	14508	44.8	299.79	2.23e-306
	chr11	3457641	3457861	OR7E12P	44496	8.26	55.25	4.15e-37
	chr11	3512466	3512686	OR7E12P	99321	15.3	51.14	2.42e-67
	chr11	3637289	3637509	TRPC2	10182	67.5	451.44	0
	chr11	4115790	4116010	RRM1	0	22.1	37.03	7.94e-87
	chr11	4475375	4475595	OR52K2	4850	36.2	60.55	4.52e-166
	chr11	4485554	4485774	OR52K2	15029	239.7	160.36	0
	chr11	4888335	4888555	OR51T1	14495	15.8	52.9	4.65e-69
	chr11	5711680	5711900	TRIM22	863	155	259.23	0
	chr11	5828908	5829128	OR52N2	12439	32	53.49	9.76e-140
	chr11	5887094	5887314	OR52E8	8162	68.9	76.81	0
	chr11	7927825	7928045	LOC283299	323	25.1	84.06	1.12e-127
	chr11	8160169	8160389	RIC3	30202	142.4	476.13	0
	chr11	9160477	9160697	KRT8P41	44567	38.3	42.71	1.56e-156
	chr11	9166885	9167105	KRT8P41	50975	77.9	86.8	0
	chr11	9232424	9232644	DENND5A	54230	22	73.48	8.34e-107
	chr11	9379458	9379678	IPO7	26492	11.4	76.42	4.22e-57
	chr11	9497054	9497274	ZNF143	14542	54	180.46	0
	chr11	9631591	9631811	WEE1	36363	141.8	158.12	0
	chr11	9823897	9824117	LOC101928008	36573	45.7	305.66	8.10e-314
	chr11	9967791	9968011	LOC101928008	107102	12.3	41.15	1.13e-50
	chr11	10066197	10066417	LOC101928008	205508	286.3	1915.11	0
	chr11	10521874	10522094	MIR4485	7780	20.2	67.6	1.02e-95
	chr11	11068062	11068282	ZBED5-AS1	188298	7.03	47.03	2.8e-30
	chr11	11414494	11414714	CSNK2A3	39590	18.5	61.72	7.37e-85
	chr11	12087573	12087793	MICAL2	44331	95.4	159.59	0
	chr11	12211199	12211419	MIR6124	25969	24.4	81.71	6.42e-122
	chr11	16654458	16654678	C11orf58	105471	27.1	30.17	3.02e-97
	chr11	16797136	16797356	C11orf58	36988	34.4	28.8	1.12e-121
	chr11	17134365	17134585	RPS13	35145	57.6	64.27	5.77e-267
	chr11	17391462	17391682	NCR3LG1	18153	97.9	163.71	0
	chr11	17400275	17400495	KCNJ11	10384	145.5	243.36	0
	chr11	17493116	17493336	ABCC8	5057	107.9	90.23	0
	chr11	17909188	17909408	SERGEF	125302	25.7	42.91	1.9e-104
	chr11	18921708	18921928	MRGPRX1	34622	25.3	84.65	1.12e-127
	chr11	19266245	19266465	E2F8	3043	48.3	80.82	5.28e-240
	chr11	19554927	19555147	NAV2-AS4	9302	62.7	209.85	0
	chr11	20072134	20072354	NAV2-AS2	1285	27.9	23.37	1.62e-90
	chr11	20496502	20496722	PRMT3	87426	36.9	41.15	2.04e-148
	chr11	20505576	20505796	PRMT3	96500	349.6	584.58	0
	chr11	21619286	21619506	ANO5	595217	13.5	22.63	4.16e-44
	chr11	22372698	22372918	SLC17A6	13031	34.1	22.81	1.33e-109
	chr11	22942555	22942775	CCDC179	60583	8.79	29.39	4.3e-32
	chr11	25264596	25264816	LUZP2	746080	29.4	98.17	3.94e-155
	chr11	26037496	26037716	ANO3	315963	35.5	237.48	3.9e-231
	chr11	27537463	27537683	MIR8087	869	16.3	109.33	1.46e-88
	chr11	27657374	27657594	LINC00678	1200	110.7	370.32	0
	chr11	28312626	28312846	METTL15	182828	43.1	72.01	5.51e-208
	chr11	28542731	28542951	MIR8068	43636	292.1	488.48	0
	chr11	29830722	29830942	KCNA4	207636	7.21	48.2	5.83e-32
	chr11	30219471	30219691	FSHB	32873	162.2	90.43	0
	chr11	30522769	30522989	MPPED2	84942	38.7	129.32	7.45e-219
	chr11	31034850	31035070	DCDC5	20617	20.7	34.68	4.81e-79
	chr11	31276100	31276320	DCDC1	115038	15.8	105.81	1.67e-84
	chr11	32102803	32103023	RCN1	9455	26.4	29.39	2.69e-94
	chr11	32325230	32325450	WT1	126914	101.9	170.47	0
	chr11	33067471	33067691	TCP11L1	6508	95.6	319.77	0
	chr11	33083065	33083285	LINC00294	14412	135.3	56.58	0
	chr11	33677905	33678125	C11orf91	44162	44.5	148.72	1.45e-259
	chr11	34393130	34393350	ABTB2	13575	7.91	26.45	9.47e-28
	chr11	34657769	34657989	EHF	15181	28.8	48.2	1.1e-122
	chr11	34707030	34707250	EHF	64442	164.2	91.5	0
	chr11	35078188	35078408	LOC100507144	81172	26.7	89.35	2.25e-137
	chr11	35915561	35915781	LDLRAD3	49832	39	65.25	2.89e-182
	chr11	36039823	36040043	MIR3973	8175	64.7	54.08	2.07e-284
	chr11	38517298	38517518	LOC103312105	150389	39	32.62	5.41e-144
	chr11	38616578	38616798	LOC103312105	51109	79.3	88.37	0
	chr11	39474449	39474669	LOC101928536	804041	14.8	24.69	1.3e-49
	chr11	40130166	40130386	LRRC4C	184295	37.1	31.01	5.68e-135
	chr11	41507785	41508005	LOC100507205	767236	76.6	64.07	0
	chr11	41525415	41525635	LOC100507205	749606	14.2	23.81	7.68e-47
	chr11	41810997	41811217	LOC100507205	464024	66.1	110.51	0
	chr11	42597923	42598143	LOC100507205	322683	7.56	25.28	2.47e-26
	chr11	42793466	42793686	HNRNPKP3	497234	49	54.67	2.73e-217
	chr11	43148962	43149182	HNRNPKP3	141738	23.4	78.18	3.29e-116
	chr11	44586232	44586452	CD82	690	26.7	89.35	2.25e-137
	chr11	44801168	44801388	TSPAN18	15192	7.91	52.9	2.24e-35
	chr11	45359531	45359751	LOC101928812	17172	8.26	27.63	3.5e-29
	chr11	45758070	45758290	LOC100507384	14212	59.1	65.84	4.97e-276
	chr11	46679364	46679584	ATG13	40538	203.7	227.09	0
	chr11	46848010	46848230	CKAP5	19630	84.9	56.78	0
	chr11	47008908	47009128	C11orf49	50668	57.5	32.04	1.83e-210
	chr11	47236430	47236650	DDB2	0	623.4	521.25	0
	chr11	49578477	49578697	LOC440040	1384	12	39.97	1.85e-47
	chr11	50066178	50066398	OR4C12	62107	62	69.17	2.53e-294
	chr11	56038567	56038787	OR5T1	4329	41.1	137.55	7.39e-236
	chr11	56977903	56978123	APLNR	26805	14.9	49.96	6.17e-64
	chr11	57555938	57556158	CTNND1	26704	49.4	165.18	6.82e-297
	chr11	58426069	58426289	CNTF	35923	113.4	379.14	0
	chr11	58968908	58969128	MPEG1	11367	20	67.01	1.02e-95
	chr11	59341030	59341250	MIR3162	21382	48	32.09	1.01e-175
	chr11	60028266	60028486	MS4A4A	19529	16.7	27.92	3.98e-58
	chr11	60331149	60331369	MS4A13	48263	228.3	127.26	0
	chr11	60639605	60639825	ZP1	4590	30.4	25.42	1.3e-101
	chr11	60703172	60703392	TMEM132A	11259	33.7	56.43	3.62e-150
	chr11	61065158	61065378	VWCE	2370	36.7	40.95	8.36e-147
	chr11	61068127	61068347	VWCE	5339	80.5	134.61	0
	chr11	61548406	61548626	MIR611	11408	31.6	26.45	2.9e-107
	chr11	61587688	61587908	FADS1	3159	287.5	320.56	0
	chr11	61748776	61748996	FTH1	13644	166.3	111.21	0
	chr11	61766537	61766757	FTH1	31405	372.8	623.38	0
	chr11	61863725	61863945	INCENP	27501	62.4	52.17	1.31e-270
	chr11	61866874	61867094	INCENP	24352	61.7	412.65	0
	chr11	61990409	61990629	SCGB2A1	14269	235.5	393.84	0
	chr11	62053159	62053379	SCGB1D4	13158	81.5	54.55	0
	chr11	62367452	62367672	MTA2	1641	420.2	351.37	0
	chr11	62470686	62470906	GNG3	4161	22.5	37.62	2.12e-88
	chr11	63313274	63313494	MIR3680-1	7631	32	106.98	3.24e-171
	chr11	63333299	63333519	HRASLS2	2444	41.1	68.77	4.77e-195
	chr11	63559027	63559247	C11orf84	21677	143.9	240.71	0
	chr11	64078676	64078896	ESRRA	5676	19.3	129.32	2.59e-109
	chr11	64092268	64092488	PRDX5	6708	26.5	44.38	2.31e-109
	chr11	64204907	64205127	LOC100996455	11403	46.9	78.47	1.68e-230
	chr11	64287019	64287239	SLC22A11	35860	39.4	32.92	1.65e-145
	chr11	64610525	64610745	CDC42BPG	1297	115.5	77.24	0
	chr11	64808692	64808912	SAC3D1	316	78.7	87.78	0
	chr11	64889617	64889837	MRPL49	0	33.9	56.72	6.41e-152
	chr11	64889617	64889837	FAU	0	33.9	56.72	6.41e-152
	chr11	64921495	64921715	SPDYC	15993	27.6	23.07	3.77e-89
	chr11	65188690	65188910	NEAT1	1360	845.9	282.92	0
	chr11	65551514	65551734	OVOL1	2772	36	60.25	2.73e-164
	chr11	65560690	65560910	OVOL1-AS1	2351	66.1	55.25	4.2e-293
	chr11	65666606	65666826	FOSL1	1172	195.8	130.97	0
	chr11	66106570	66106790	RIN1	2570	19.9	33.21	1.89e-74
	chr11	66133094	66133314	SLC29A2	5978	11.1	37.03	2.75e-44
	chr11	66386807	66387027	RBM14	2754	459.8	256.29	0
	chr11	66386807	66387027	RBM14-RBM4	2754	459.8	256.29	0
	chr11	66462351	66462571	RBM4B	16959	38	25.39	3.48e-126
	chr11	66786697	66786917	SYT12	3274	25.5	28.41	6.58e-90
	chr11	66825189	66825409	RHOD	900	75.6	42.13	1.54e-304
	chr11	66850019	66850239	RHOD	25730	76.3	510.23	0
	chr11	67423856	67424076	ACY3	5726	74	61.87	0
	chr11	67487536	67487756	ALDH3B2	45434	14.6	48.79	3.03e-62
	chr11	67841168	67841388	MIR6753	28907	24.3	40.56	5.79e-98
	chr11	67965859	67966079	SUV420H1	14706	214.2	1433.1	0
	chr11	68049626	68049846	C11orf24	10157	122.8	58.7	0
	chr11	68104839	68105059	LRP5	24762	70.8	33.84	2.07e-263
	chr11	68585718	68585938	CPT1A	23462	101.9	170.47	0
	chr11	68706501	68706721	IGHMBP2	35182	8.61	28.8	1.25e-30
	chr11	68888481	68888701	LOC338694	50330	62.7	69.95	5.24e-298
	chr11	68917184	68917404	LOC338694	21627	51	85.23	2.82e-257
	chr11	69316422	69316642	LOC101928292	16093	116.9	65.15	0
	chr11	69325356	69325576	LOC101928292	25027	113.4	63.19	0
	chr11	69624393	69624613	FGF3	9580	69.8	77.79	0
	chr11	69909762	69909982	LOC101928443	1496	41.7	46.44	1.11e-174
	chr11	70371260	70371480	SHANK2-AS1	105720	58	64.66	8.96e-269
	chr11	70460450	70460670	SHANK2-AS1	16530	120.9	202.21	0
	chr11	70490057	70490277	SHANK2-AS1	12858	149.2	83.18	0
	chr11	70615750	70615970	SHANK2-AS3	92926	99.7	66.66	0
	chr11	70933233	70933453	SHANK2	2390	27.8	92.88	2.99e-143
	chr11	71442358	71442578	FAM86C1	55980	26.5	44.38	2.31e-109
	chr11	71507876	71508096	FAM86C1	9319	9.49	31.74	4.62e-35
	chr11	71513876	71514096	ALG1L9P	10810	39.2	262.17	2.63e-262
	chr11	71656226	71656446	RNF121	16458	99.3	166.06	0
	chr11	72435156	72435376	ARAP1	28059	25	41.73	3.4e-101
	chr11	72897473	72897693	P2RY2	31651	65.7	36.64	6.38e-252
	chr11	72898947	72899167	P2RY2	30177	67.7	56.58	7.62e-302
	chr11	72953902	72954122	P2RY2	24559	30.1	33.51	2.83e-112
	chr11	73658145	73658365	DNAJB13	3000	48	320.95	0
	chr11	73846355	73846575	C2CD3	35490	414.6	198.09	0
	chr11	74216065	74216285	LIPT2	11310	15.8	26.45	7.85e-54
	chr11	74909643	74909863	SLCO2B1	38799	47.3	26.35	1.23e-160
	chr11	75067625	75067845	ARRB1	4750	41.5	34.68	3.31e-156
	chr11	75211888	75212108	GDPD5	24492	68.9	38.4	3.09e-269
	chr11	75807833	75808053	WNT11	109522	29.9	33.31	9.45e-111
	chr11	76278440	76278660	LRRC32	102385	31.6	35.27	5.93e-120
	chr11	76495646	76495866	LOC101928837	1540	68.2	57.02	2.35e-305
	chr11	76535990	76536210	ACER3	35708	29.2	48.79	2.28e-124
	chr11	77271840	77272060	AQP11	28621	83.8	70.1	0
	chr11	77878153	77878373	KCTD21	21292	22.1	37.03	7.94e-87
	chr11	78867117	78867337	MIR708	245817	133.4	74.36	0
	chr11	78868866	78869086	MIR708	244068	27.2	45.56	2.53e-114
	chr11	78879836	78880056	MIR708	233098	217.8	242.77	0
	chr11	80065612	80065832	TENM4	913917	42.7	28.57	4.65e-149
	chr11	80627329	80627549	MIR4300	974330	80.7	53.96	0
	chr11	80745319	80745539	MIR4300	856340	60.8	101.69	2.72e-322
	chr11	81515950	81516170	MIR4300	85709	25	41.73	3.4e-101
	chr11	81734017	81734237	MIR4300	132139	43.1	48.01	4.65e-183
	chr11	82871659	82871879	PCF11	3522	98.1	46.86	0
	chr11	83372856	83373076	CCDC90B	375406	242.9	406.18	0
	chr11	83887107	83887327	CCDC90B	889657	162.4	181.05	0
	chr11	84995524	84995744	DLG2	342571	156.8	58.26	0
	chr11	85518046	85518266	SYTL2	3937	175.9	58.84	0
	chr11	85858889	85859109	PICALM	77966	33.4	22.34	1.54e-105
	chr11	86046542	86046762	C11orf73	33289	551.2	460.85	0
	chr11	86208304	86208524	CCDC81	122526	42.7	35.71	2.17e-162
	chr11	86290263	86290483	ME3	93196	24.8	27.63	1.45e-85
	chr11	86377332	86377552	ME3	6127	77.3	43.11	2.58e-314
	chr11	86431190	86431410	ME3	47512	86.1	96.01	0
	chr11	86739827	86740047	TMEM135	8840	142	94.99	0
	chr11	87174667	87174887	TMEM135	425781	45.3	37.91	1.78e-176
	chr11	87315307	87315527	TMEM135	566421	92.4	618.38	0
	chr11	89041405	89041625	TYR	130365	5.45	36.44	3.61e-22
	chr11	90188636	90188856	MIR4490	100170	29.2	97.58	3.86e-153
	chr11	91304830	91305050	FAT3	780213	53.3	44.53	4.41e-220
	chr11	91519481	91519701	FAT3	565562	25	41.73	3.4e-101
	chr11	92207002	92207222	FAT3	121740	13.7	22.92	4.16e-44
	chr11	92318651	92318871	FAT3	233389	14.1	47.03	1.45e-60
	chr11	92576705	92576925	MTNR1B	125865	51	42.62	5.79e-207
	chr11	92753539	92753759	MTNR1B	50750	18.6	62.31	1.19e-86
	chr11	93752397	93752617	HEPHL1	1762	25.1	168.12	9.46e-153
	chr11	93838014	93838234	PANX1	23861	71.9	80.14	0
	chr11	93845845	93846065	PANX1	16030	55.5	185.75	0
	chr11	93888445	93888665	PANX1	26351	11.8	39.38	1.85e-47
	chr11	94038452	94038672	FOLR4	132	65.7	219.84	0
	chr11	94768560	94768780	KDM4E	10138	37.8	63.19	4.93e-175
	chr11	94798602	94798822	SRSF8	1220	289.3	138.22	0
	chr11	94852814	94853034	ENDOD1	29840	38.1	63.78	7.76e-177
	chr11	95302119	95302339	FAM76B	220616	27.4	45.85	2.53e-114
	chr11	95916320	95916540	MIR1260B	158063	17.9	59.96	2.7e-81
	chr11	95940582	95940802	MIR1260B	133801	16.2	27.04	1.1e-56
	chr11	96554683	96554903	JRKL-AS1	314642	14.9	49.96	6.17e-64
	chr11	97046336	97046556	JRKL-AS1	806295	34.1	114.04	1.46e-187
	chr11	97562751	97562971	JRKL-AS1	1322710	49.6	165.76	6.82e-297
	chr11	97614252	97614472	JRKL-AS1	1374211	118.6	132.26	0
	chr11	98432035	98432255	CNTN5	994622	93.7	626.61	0
	chr11	100383347	100383567	ARHGAP42	174841	58.7	39.27	1.35e-231
	chr11	100560644	100560864	ARHGAP42	2237	72.9	121.97	0
	chr11	100904934	100905154	TMEM133	42123	22.5	25.08	1.27e-75
	chr11	101257979	101258199	MIR3920	132438	33.4	223.37	1.33e-214
	chr11	101305068	101305288	MIR3920	85349	100.9	337.41	0
	chr11	101612597	101612817	TRPC6	157938	29.7	99.34	3.98e-157
	chr11	102127074	102127294	BIRC3	60888	522.9	3497.51	0
	chr11	102979888	102980108	DYNC2H1	53	28.1	94.05	3.42e-147
	chr11	103392421	103392641	MIR4693	327994	57.6	64.27	5.77e-267
	chr11	104209027	104209247	PDGFD	174000	14.9	49.96	6.17e-64
	chr11	105854280	105854500	MSANTD4	38455	36	120.5	5.55e-200
	chr11	106044816	106045036	LOC101928535	77099	20.2	22.53	1.32e-64
	chr11	106100829	106101049	LOC101928535	21086	22.7	25.28	1.27e-75
	chr11	106660223	106660443	GUCY1A2	228729	21.1	70.54	3.12e-101
	chr11	107029876	107030096	GUCY1A2	140705	14.2	95.23	1.67e-74
	chr11	107103199	107103419	GUCY1A2	214028	14.8	24.69	1.3e-49
	chr11	108205966	108206186	ATM	112407	111.8	186.93	0
	chr11	108519181	108519401	DDX10	16352	71.2	79.36	0
	chr11	108813236	108813456	DDX10	277484	7.73	25.86	2.47e-26
	chr11	108819068	108819288	DDX10	283316	146	162.83	0
	chr11	109213053	109213273	C11orf87	79574	20.4	136.37	8.29e-118
	chr11	109893347	109893567	ZC3H12C	70521	146	488.48	0
	chr11	110151015	110151235	RDX	16203	19.7	32.92	6.24e-73
	chr11	110224179	110224399	RDX	56742	18.8	31.45	2.05e-68
	chr11	110236988	110237208	FDX1	63454	21.1	70.54	3.12e-101
	chr11	111259719	111259939	POU2AF1	9562	27.2	91.11	2.75e-141
	chr11	111297391	111297611	LOC100132078	8480	27.8	30.96	3.25e-100
	chr11	111381162	111381382	BTG4	1698	291.7	487.89	0
	chr11	111461867	111462087	SIK2	11084	13.2	44.09	1.42e-55
	chr11	112259359	112259579	LOC101928823	93377	51.3	171.64	2.98e-310
	chr11	112283020	112283240	LOC101928823	69716	38.8	32.48	1.76e-142
	chr11	112417157	112417377	LOC387810	9149	11.6	38.8	7.22e-46
	chr11	112496679	112496899	LOC387810	70154	20.9	23.32	2.54e-67
	chr11	112784616	112784836	NCAM1	47134	12.3	82.29	8.25e-63
	chr11	113215116	113215336	TTC12	29865	40.2	26.92	1.61e-137
	chr11	113255412	113255632	ANKK1	2882	207.2	231.01	0
	chr11	113317723	113317943	MIR4301	2868	165.4	276.57	0
	chr11	114069448	114069668	NNMT	96868	25.8	86.41	1.54e-131
	chr11	115458461	115458681	CADM1	83220	45.7	38.21	4.67e-178
	chr11	116399319	116399539	BUD13	244176	8.26	55.25	4.15e-37
	chr11	117164967	117165187	BACE1-AS	2905	26.5	88.76	2.01e-135
	chr11	117377119	117377339	CEP164	178548	48.2	40.27	2.11e-192
	chr11	117666806	117667026	DSCAML1	951	39	32.62	5.41e-144
	chr11	117945626	117945846	TMPRSS4	1882	44.6	74.65	2.57e-217
	chr11	117963736	117963956	TMPRSS4-AS1	6228	91	60.9	0
	chr11	118858983	118859203	CCDC84	9641	46.6	38.94	8.19e-183
	chr11	119247119	119247339	USP2-AS1	5150	48.5	40.56	5.22e-194
	chr11	119276132	119276352	THY1	17895	75.2	251.59	0
	chr11	119479798	119480018	PVRL1	119418	27.9	31.15	1.05e-101
	chr11	119483618	119483838	PVRL1	115598	65	217.49	0
	chr11	119567159	119567379	PVRL1	32057	292.4	489.06	0
	chr11	119716508	119716728	PVRL1	117073	251.8	280.78	0
	chr11	119895725	119895945	TRIM29	112919	235.9	394.43	0
	chr11	120127120	120127340	LOC649133	9302	16	53.49	8.77e-71
	chr11	120330870	120331090	GRIK4	51376	29.9	49.96	9.38e-128
	chr11	120396460	120396680	GRIK4	13995	18.3	30.57	6.35e-67
	chr11	120473764	120473984	GRIK4	91299	43.6	72.89	7.6e-210
	chr11	120617960	120618180	GRIK4	235495	15.6	52.32	4.65e-69
	chr11	121128713	121128933	SC5D	34456	65.2	36.35	2.33e-250
	chr11	121353275	121353495	SORL1	30363	44.1	49.18	4.03e-188
	chr11	122213134	122213354	MIR100HG	139364	15.8	105.81	1.67e-84
	chr11	123487286	123487506	SCN3B	37810	22.8	76.42	1.98e-112
	chr11	123549034	123549254	SCN3B	23719	37.6	62.9	3.11e-173
	chr11	123628775	123628995	OR6X1	3549	26.4	29.39	2.69e-94
	chr11	124093160	124093380	OR8G2	1965	129.4	108.16	0
	chr11	124510623	124510843	TBRG1	17881	12.1	40.56	4.62e-49
	chr11	125439277	125439497	EI24	0	53.4	89.35	8.41e-273
	chr11	126146808	126147028	TIRAP	5955	37.1	248.06	1.89e-245
	chr11	126431290	126431510	LOC101929427	94472	7.03	23.51	1.48e-23
	chr11	129495921	129496141	TMEM45B	189601	196	163.85	0
	chr11	129511896	129512116	TMEM45B	173626	54.7	45.7	1.06e-226
	chr11	129693266	129693486	TMEM45B	7525	7.91	26.45	9.47e-28
	chr11	129906984	129907204	APLP2	32513	7.56	25.28	2.47e-26
	chr11	130448469	130448689	MIR8052	87942	16.7	27.92	3.98e-58
	chr11	131539315	131539535	LOC101929653	128554	21.8	36.44	1.07e-83
	chr11	131861582	131861802	NTM-IT	292395	6.5	43.5	5.66e-27
	chr11	131958515	131958735	NTM-IT	195462	28.5	190.45	1.48e-177
	chr11	132484000	132484220	OPCML	328818	5.98	39.97	9.51e-24
	chr11	133699443	133699663	SPATA19	15771	37.4	62.6	3.11e-173
	chr12	957017	957237	WNK1	94928	192.3	1286.14	0
	chr12	1130896	1131116	ERC1	30492	16.9	28.22	1.42e-59
	chr12	2113725	2113945	DCP1B	48	406.9	340.2	0
	chr12	2499384	2499604	CACNA1C-IT3	120442	24.1	40.27	2.34e-96
	chr12	2806354	2806574	CACNA1C-AS1	6031	63.4	212.2	0
	chr12	3326596	3326816	TSPAN9	140075	16	53.49	8.77e-71
	chr12	3409139	3409359	PRMT8	191006	44.5	49.57	8.17e-190
	chr12	3487999	3488219	PRMT8	112146	25.8	28.8	2.29e-91
	chr12	4222067	4222287	CCND2	160616	89.3	298.61	0
	chr12	4492482	4492702	FGF23	3588	17.8	29.68	5.82e-64
	chr12	4592175	4592395	FGF6	37395	28.8	96.4	3.75e-151
	chr12	5249256	5249476	KCNA5	96171	50.8	169.88	8.67e-306
	chr12	6616873	6617093	SCARNA10	2296	239.5	200.3	0
	chr12	6859813	6860033	MLF2	2604	18.5	30.86	6.35e-67
	chr12	7146811	7147031	C1S	20950	84.5	141.37	0
	chr12	7760850	7761070	APOBEC1	57433	8.96	29.98	4.3e-32
	chr12	7825228	7825448	APOBEC1	6726	18.6	124.62	4.18e-105
	chr12	8028634	8028854	SLC2A14	14939	25.5	170.47	5.57e-155
	chr12	8722026	8722246	CLEC4E	28468	17.9	119.91	7.59e-99
	chr12	8980218	8980438	A2ML1	5068	86.6	144.9	0
	chr12	9108764	9108984	M6PR	6407	20	22.34	1.32e-64
	chr12	9878157	9878377	CLECL1	7519	57.5	96.11	2.42e-300
	chr12	10063761	10063981	CLEC2A	21000	108.4	362.68	0
	chr12	10225951	10226171	CLEC1A	25435	23.2	77.59	2.57e-114
	chr12	11071532	11071752	TAS2R13	9371	117.6	393.25	0
	chr12	11394832	11395052	PRB3	27590	31.1	52.02	2.72e-136
	chr12	11481617	11481837	PRB4	18248	37.6	25.16	8.76e-125
	chr12	11496862	11497082	PRB1	11443	61.3	51.29	1.82e-265
	chr12	11522091	11522311	PRB1	13567	16.2	54.08	1.62e-72
	chr12	11561125	11561345	PRB2	12627	130.2	87.11	0
	chr12	11788358	11788578	ETV6	14211	173.6	96.79	0
	chr12	11983594	11983814	RNU6-19P	95294	29.2	195.16	3.98e-182
	chr12	12200092	12200312	BCL2L14	24091	82.3	137.55	0
	chr12	12598904	12599124	LOH12CR1	88884	81.7	273.33	0
	chr12	12622478	12622698	DUSP16	92751	32.3	108.16	2.8e-175
	chr12	13226949	13227169	GSG1	29462	13.2	22.04	9.37e-43
	chr12	13492575	13492795	C12orf36	36885	39	260.99	6.89e-260
	chr12	14470355	14470575	ATF7IP	47992	90.2	603.1	0
	chr12	14652515	14652735	LOC101928290	67932	53.1	44.38	1.96e-218
	chr12	14694049	14694269	LOC101928290	26398	17.9	29.98	5.82e-64
	chr12	15688316	15688536	PTPRO	10743	165.6	110.74	0
	chr12	16089735	16089955	DERA	25549	165.9	1109.8	0
	chr12	16462796	16463016	SLC15A5	32177	21.8	72.89	6.09e-105
	chr12	16949290	16949510	LMO3	189754	25.8	43.2	4.42e-106
	chr12	17901676	17901896	MIR3974	75443	10.5	70.54	1.71e-51
	chr12	18283338	18283558	RERGL	40211	9.14	61.13	2.13e-42
	chr12	18502684	18502904	PIK3C2G	88210	65.2	218.08	0
	chr12	18539609	18539829	PIK3C2G	125135	72.6	80.92	0
	chr12	19234280	19234500	PLEKHA5	48127	15.1	50.55	1.23e-65
	chr12	19249894	19250114	PLEKHA5	32513	48.3	161.65	4.88e-288
	chr12	19584852	19585072	AEBP2	7537	505.8	563.91	0
	chr12	20628410	20628630	PDE3A	106231	17.2	57.61	9.24e-78
	chr12	21971801	21972021	KCNJ8	44046	64.7	216.32	0
	chr12	22984011	22984231	ETNK1	205935	92.6	309.78	0
	chr12	23052317	23052537	ETNK1	274241	13.4	44.67	1.42e-55
	chr12	23237593	23237813	LOC101928441	90758	10.5	35.27	3.66e-41
	chr12	25147329	25147549	C12orf77	2825	14.1	94.05	1.67e-74
	chr12	25207108	25207328	LRMP	1927	105.8	117.96	0
	chr12	25288717	25288937	CASC1	59158	80.8	54.08	0
	chr12	25864284	25864504	IFLTD1	158067	106.7	356.8	0
	chr12	27165884	27166104	TM7SF3	1236	136.9	457.91	0
	chr12	27379218	27379438	STK38L	17641	17.2	57.61	9.24e-78
	chr12	27702182	27702402	PPFIBP1	25137	80.7	67.45	0
	chr12	27856709	27856929	MRPS35	6778	9.49	31.74	4.62e-35
	chr12	28385667	28385887	CCDC91	24247	23	38.5	1.45e-91
	chr12	29286545	29286765	FAR2	15172	17.4	29.1	1.72e-62
	chr12	29546799	29547019	OVCH1-AS1	4572	7.21	24.1	6.18e-25
	chr12	29552110	29552330	OVCH1-AS1	9883	13.2	22.04	9.37e-43
	chr12	29787020	29787240	OVCH1	136401	17.6	58.78	1.59e-79
	chr12	31399333	31399553	FLJ13224	77698	33.9	56.72	6.41e-152
	chr12	31589511	31589731	FAM60A	110352	58.2	38.91	2.07e-228
	chr12	31885934	31886154	AMN1	3826	23.9	39.97	9.38e-95
	chr12	32081243	32081463	KIAA1551	30891	22.5	25.08	1.27e-75
	chr12	32197205	32197425	RNU6-78P	50403	25.8	43.2	4.42e-106
	chr12	32401831	32402051	BICD1	141646	125.1	139.51	0
	chr12	33054435	33054655	PKP2	4655	47.6	39.82	3.4e-189
	chr12	34356326	34356546	ALG10	181110	19.9	66.42	6.86e-94
	chr12	34382307	34382527	ALG10	207091	35.9	39.97	5.49e-142
	chr12	40340167	40340387	SLC2A13	159275	8.26	27.63	3.5e-29
	chr12	40422194	40422414	SLC2A13	77248	82.3	55.02	0
	chr12	40552774	40552994	SLC2A13	53113	36	24.1	7.9e-118
	chr12	40803304	40803524	MUC19	16108	63.4	212.2	0
	chr12	40868557	40868777	MUC19	81361	153.6	513.75	0
	chr12	41332617	41332837	CNTN1	246373	58	64.66	8.96e-269
	chr12	43094473	43094693	LOC101927058	54173	18.6	31.15	2.05e-68
	chr12	43316088	43316308	LOC101927058	275788	40.6	45.26	4.88e-168
	chr12	43980524	43980744	ADAMTS20	34800	83.7	559.6	0
	chr12	44423077	44423297	TMEM117	193413	62.4	208.67	0
	chr12	45276660	45276880	NELL2	30832	69.4	77.4	0
	chr12	46038880	46039100	LINC00938	82605	45.9	38.36	1.22e-179
	chr12	46465179	46465399	SCAF11	80778	101.6	56.63	0
	chr12	46501467	46501687	SCAF11	117066	212.8	177.96	0
	chr12	46971310	46971530	SLC38A2	204665	106.7	50.97	0
	chr12	47303121	47303341	SLC38A4	83341	40.8	45.46	1.08e-169
	chr12	47697967	47698187	PCED1B-AS1	87741	41.8	46.63	1.11e-174
	chr12	47903504	47903724	RPAP3	196121	127.4	142.06	0
	chr12	47950127	47950347	RPAP3	149498	349.2	584	0
	chr12	48162263	48162483	SLC48A1	4485	130.9	87.58	0
	chr12	48270407	48270627	VDR	28188	58.9	49.23	3.71e-250
	chr12	48604374	48604594	OR10AD1	7299	37.6	62.9	3.11e-173
	chr12	48748511	48748731	ZNF641	3482	30.4	101.69	3.94e-161
	chr12	48858926	48859146	ANP32D	7303	133.7	111.83	0
	chr12	48996043	48996263	LALBA	32214	130.1	217.49	0
	chr12	49682868	49683088	PRPH	5822	88.6	296.26	0
	chr12	49797775	49797995	LOC100335030	14818	67.8	45.38	2.24e-280
	chr12	50564213	50564433	CERS5	2897	334.3	223.61	0
	chr12	50812239	50812459	LARP4	17647	46.7	31.27	1.02e-169
	chr12	51036632	51036852	ATF1	120938	56.6	63.09	1.49e-261
	chr12	51322225	51322445	METTL7A	3691	56.8	63.29	1.49e-261
	chr12	52435410	52435630	NR4A1	9557	32.7	54.67	6.2e-145
	chr12	52569863	52570083	KRT80	15702	388.1	324.47	0
	chr12	52622336	52622556	KRT7	4399	124.1	207.5	0
	chr12	52732459	52732679	KRT83	17277	127.8	61.05	0
	chr12	52976707	52976927	KRT74	9098	31.6	52.9	5.17e-138
	chr12	53059786	53060006	KRT2	13827	13.5	45.26	3.14e-57
	chr12	53194705	53194925	KRT3	4813	104.6	58.29	0
	chr12	54308985	54309205	HOXC13	23372	53.4	59.57	6.87e-242
	chr12	55075119	55075339	DCD	32970	26.5	22.19	9.9e-84
	chr12	55566532	55566752	OR9K2	42979	84.2	281.56	0
	chr12	56792409	56792629	APOF	35826	25.5	85.23	1.32e-129
	chr12	56829188	56829408	TIMELESS	13793	28.1	47.03	2.52e-119
	chr12	57233679	57233899	HSD17B6	76677	15.6	26.16	7.85e-54
	chr12	57374056	57374276	GPR182	14080	46.4	51.73	9.53e-202
	chr12	57425273	57425493	TAC3	14929	279.6	133.6	0
	chr12	57489970	57490190	NAB2	7293	189.3	105.51	0
	chr12	57723790	57724010	R3HDM2	19544	50.1	55.84	1.61e-222
	chr12	57776054	57776274	INHBC	52195	49.2	82.29	9.75e-246
	chr12	57915997	57916217	MBD6	443	58.7	65.44	3.26e-274
	chr12	58656596	58656816	XRCC6BP1	321151	26.9	44.97	5.19e-111
	chr12	58898643	58898863	LOC101927653	276636	57.5	96.11	2.42e-300
	chr12	59281948	59282168	LRIG3	32152	54.1	90.52	1.15e-278
	chr12	59300792	59301012	LRIG3	13308	72.6	60.69	0
	chr12	59434981	59435201	LRIG3	120662	79.8	29.65	6.71e-282
	chr12	59747766	59747986	SLC16A7	241836	43.1	36	1.69e-165
	chr12	59751650	59751870	SLC16A7	237952	245	1638.83	0
	chr12	60108550	60108770	SLC16A7	118729	16.3	27.33	1.1e-56
	chr12	61314998	61315218	FAM19A2	1271403	183.8	614.86	0
	chr12	61437705	61437925	FAM19A2	1148696	49.6	33.15	2.74e-183
	chr12	62087634	62087854	FAM19A2	498767	27.9	46.73	1.18e-117
	chr12	62586737	62586957	FAM19A2	117	387.5	117.83	0
	chr12	63196195	63196415	PPM1H	132251	70.7	118.15	0
	chr12	63233206	63233426	PPM1H	95240	22.3	37.33	7.94e-87
	chr12	63614081	63614301	AVPR1A	67491	129.4	54.08	0
	chr12	63711288	63711508	AVPR1A	164698	39.2	32.77	1.65e-145
	chr12	64563876	64564096	C12orf66	51981	75.7	126.67	0
	chr12	64734339	64734559	C12orf56	49787	36.6	40.76	8.36e-147
	chr12	64916077	64916297	TBK1	70237	113.2	42.06	0
	chr12	65028544	65028764	MIR548C	12255	607.9	338.88	0
	chr12	65101217	65101437	GNS	51790	193.3	161.65	0
	chr12	65377667	65377887	FLJ41278	100113	93.9	52.32	0
	chr12	65599701	65599921	LEMD3	36350	57.1	31.84	5.86e-209
	chr12	66033491	66033711	LOC100507065	2442	123.2	412.06	0
	chr12	66408803	66409023	MIR6074	8484	72.9	60.99	0
	chr12	66531980	66532200	LLPH	7447	86.8	72.6	0
	chr12	66684824	66685044	HELB	11292	22.8	25.47	5.01e-77
	chr12	67063349	67063569	GRIP1	9357	18.3	61.13	7.37e-85
	chr12	67468055	67468275	LOC102724421	21790	28.6	23.95	2.9e-93
	chr12	67476168	67476388	LOC102724421	13677	20.4	22.73	5.84e-66
	chr12	67771433	67771653	CAND1	108372	23.2	38.8	1.45e-91
	chr12	68036084	68036304	DYRK2	6209	14.8	24.69	1.3e-49
	chr12	68435935	68436155	IFNG-AS1	52710	243.8	101.91	0
	chr12	68525893	68526113	IFNG	27409	54.7	182.81	0
	chr12	68805203	68805423	LOC100507195	39842	111.1	123.83	0
	chr12	68963999	68964219	RAP1B	40401	31.1	26.01	7.61e-106
	chr12	69175207	69175427	LOC100130075	23848	47.3	26.35	1.23e-160
	chr12	69181387	69181607	LOC100130075	17668	167.5	140.05	0
	chr12	69193938	69194158	LOC100130075	5117	124.3	103.9	0
	chr12	69202637	69202857	MDM2	685	1951.9	1088.05	0
	chr12	69960526	69960746	MIR3913-2	17758	58.5	24.47	1.71e-191
	chr12	70159392	70159612	RAB3IP	26926	31.5	35.07	5.93e-120
	chr12	70484896	70485116	CNOT2	151659	242	404.71	0
	chr12	70914668	70914888	PTPRB	88737	384.5	321.54	0
	chr12	71186463	71186683	PTPRR	38075	68.4	57.17	2.35e-305
	chr12	72047988	72048208	THAP2	9470	60.5	67.4	3.77e-285
	chr12	72119590	72119810	RAB21	28849	102.6	68.66	0
	chr12	73369005	73369225	LOC101928137	183746	81	135.49	0
	chr12	73584492	73584712	LOC101928137	31522	56.2	47.03	1.07e-236
	chr12	73953126	73953346	LOC101928137	400156	80.3	134.32	0
	chr12	74085375	74085595	LOC101928137	532405	88.9	297.44	0
	chr12	75457487	75457707	KCNC2	145822	36.2	60.55	4.52e-166
	chr12	75571802	75572022	KCNC2	31507	760.3	635.72	0
	chr12	75827300	75827520	GLIPR1L2	42450	36.9	41.15	2.04e-148
	chr12	76409011	76409231	PHLDA1	16326	148.9	124.47	0
	chr12	76938478	76938698	OSBPL8	14892	64.9	108.45	0
	chr12	77001973	77002193	OSBPL8	48384	36.9	61.72	1.2e-169
	chr12	77244114	77244334	CSRP2	28466	51.8	86.7	4.44e-263
	chr12	77459750	77459970	E2F7	390	260.1	217.49	0
	chr12	78024247	78024467	NAV3	200603	75.4	84.06	0
	chr12	78551096	78551316	NAV3	326027	220	1471.89	0
	chr12	79139936	79140156	SYT1	299278	334.6	373.07	0
	chr12	79438868	79439088	SYT1	346	24.1	161.06	7.01e-144
	chr12	80352562	80352782	PPP1R12A	23327	38.5	64.37	1.21e-178
	chr12	81171931	81172151	LOC101928420	14998	267.8	895.83	0
	chr12	83929753	83929973	TMTC2	848819	86.8	58.08	0
	chr12	85132273	85132493	SLC6A15	174116	52.9	35.39	3.66e-200
	chr12	86075091	86075311	RASSF9	155008	23.7	158.71	1.12e-141
	chr12	86961462	86961682	MIR548AL	14733	30.4	25.42	1.3e-101
	chr12	87124087	87124307	MGAT4C	108375	71.9	80.14	0
	chr12	87492508	87492728	MGAT4C	259827	13.7	45.85	3.14e-57
	chr12	87625680	87625900	MGAT4C	392999	149.7	100.16	0
	chr12	87821718	87821938	MKRN9P	356551	82.1	137.26	0
	chr12	88953546	88953766	KITLG	20485	1860.5	888.95	0
	chr12	89175820	89176040	KITLG	201570	42.4	28.33	1.32e-147
	chr12	89259449	89259669	LOC728084	153801	48.9	163.41	1.85e-292
	chr12	89621609	89621829	DUSP6	124808	74.9	35.77	5.46e-285
	chr12	89712977	89713197	DUSP6	33440	34.1	38.01	4.95e-134
	chr12	90628307	90628527	LINC00936	525575	288.8	1931.57	0
	chr12	90968494	90968714	LINC00615	343087	104.9	701.85	0
	chr12	92296769	92296989	C12orf79	239459	142.2	67.93	0
	chr12	92428737	92428957	C12orf79	107491	266.1	148.33	0
	chr12	92928169	92928389	CLLU1OS	106245	42.4	47.22	5.04e-178
	chr12	92947176	92947396	CLLU1OS	125252	25.5	85.23	1.32e-129
	chr12	92986108	92986328	C12orf74	110292	299.1	250.12	0
	chr12	93015138	93015358	C12orf74	81262	47.6	39.82	3.4e-189
	chr12	93178325	93178545	PLEKHG7	48060	496.5	553.53	0
	chr12	93358437	93358657	EEA1	35330	20	33.51	5.64e-76
	chr12	93367504	93367724	EEA1	44397	638.7	356.02	0
	chr12	93627974	93628194	LOC102724933	59832	51.1	57.02	1.58e-229
	chr12	93660322	93660542	LOC102724933	92180	29.9	99.93	3.98e-157
	chr12	94018999	94019219	CRADD	51933	171.5	143.43	0
	chr12	94596301	94596521	PLXNC1	53802	46.7	52.12	1.83e-203
	chr12	94867122	94867342	CEP83-AS1	13343	116.2	55.51	0
	chr12	94902452	94902672	CEP83-AS1	48673	33	27.63	2.02e-114
	chr12	95015527	95015747	TMCC3	28578	13	43.5	6.23e-54
	chr12	95620935	95621155	VEZT	9413	21.8	24.3	1.91e-71
	chr12	96115179	96115399	NTN4	69138	201.9	112.57	0
	chr12	96607769	96607989	ELK3	19562	44.1	73.77	1.42e-213
	chr12	96613602	96613822	ELK3	25395	52.9	29.49	1.17e-186
	chr12	96955588	96955808	CDK17	161222	30.9	34.49	7.2e-117
	chr12	97146074	97146294	NEDD1	154708	22.7	37.91	2.12e-88
	chr12	98269014	98269234	LOC643711	118719	117.6	196.62	0
	chr12	98739207	98739427	SLC9A7P1	111497	125.8	210.44	0
	chr12	98974327	98974547	SLC25A3	12857	25.1	42.03	8.09e-103
	chr12	98979744	98979964	SLC25A3	7440	58.2	64.86	1.39e-270
	chr12	99890948	99891168	FAM71C	150361	60.3	40.32	1.36e-239
	chr12	100030836	100031056	FAM71C	10473	49.7	166.35	4.11e-299
	chr12	100503294	100503514	UHRF1BP1L	33129	49.7	332.7	0
	chr12	101147552	101147772	ANO4	147653	21.6	36.15	1.07e-83
	chr12	102249191	102249411	DRAM1	21695	186.3	311.54	0
	chr12	102271227	102271447	DRAM1	122	60.5	101.1	2.74e-320
	chr12	102720219	102720439	PMCH	128605	39.2	43.69	1.91e-161
	chr12	103855169	103855389	C12orf42	34400	29	48.49	1.1e-122
	chr12	103887058	103887278	C12orf42	2511	12.1	81.12	6.76e-61
	chr12	103917631	103917851	LOC101929084	23722	542.9	363.15	0
	chr12	103973879	103974099	STAB2	6971	28.5	23.81	2.9e-93
	chr12	104626766	104626986	TXNRD1	53475	31.3	34.88	2.08e-118
	chr12	104872664	104872884	CHST11	21972	29.5	49.38	4.64e-126
	chr12	104979526	104979746	MIR3922	5666	29.4	196.33	2.03e-184
	chr12	105020585	105020805	MIR3922	35174	71.5	119.62	0
	chr12	105647710	105647930	APPL2	17702	19.2	32.04	2.03e-71
	chr12	105667474	105667694	APPL2	37466	21.6	24.1	1.91e-71
	chr12	106349237	106349457	NUAK1	184355	129.9	868.79	0
	chr12	107690628	107690848	CRY1	202993	20.9	69.95	2.18e-99
	chr12	107774091	107774311	BTBD11	200324	122	407.94	0
	chr12	107912894	107913114	BTBD11	61521	96.1	64.31	0
	chr12	108747451	108747671	CMKLR1	14357	69.1	77	0
	chr12	109151687	109151907	CORO1C	54913	66.4	111.1	0
	chr12	109192221	109192441	SSH1	58919	33.4	55.84	2.03e-148
	chr12	109301469	109301689	DAO	27612	112.7	94.2	0
	chr12	109343879	109344099	DAO	70022	279.6	467.61	0
	chr12	109638033	109638253	ACACB	60831	133	444.98	0
	chr12	110215426	110215646	FAM222A-AS1	4134	43.4	72.6	7.6e-210
	chr12	110258836	110259056	TRPV4	6235	320.2	1071	0
	chr12	110302825	110303045	GLTP	15249	34.1	22.81	1.33e-109
	chr12	110725961	110726181	ATP2A2	6929	15.8	26.45	7.85e-54
	chr12	110778693	110778913	ATP2A2	59661	225.8	188.84	0
	chr12	111572604	111572824	CUX2	100776	120.9	404.42	0
	chr12	112196232	112196452	ALDH2	8240	71.4	119.33	0
	chr12	112437143	112437363	TMEM116	13661	17.8	29.68	5.82e-64
	chr12	112749179	112749399	HECTD4	70498	58.9	32.82	1.66e-216
	chr12	113554208	113554428	RASAL1	19617	320.7	2145.53	0
	chr12	114278155	114278375	LINC01234	66667	119.7	400.3	0
	chr12	114707056	114707276	TBX5	136693	146	244.24	0
	chr12	114770424	114770644	TBX5	73325	27.2	91.11	2.75e-141
	chr12	114986733	114986953	TBX3	135017	16.2	27.04	1.1e-56
	chr12	115037771	115037991	TBX3	83979	28.8	48.2	1.1e-122
	chr12	115218759	115218979	TBX3	96790	69.9	77.98	0
	chr12	115695687	115695907	TBX3	573718	113.9	76.18	0
	chr12	115912972	115913192	MIR620	673268	147.3	98.52	0
	chr12	116841673	116841893	MIR4472-2	24231	41.3	276.27	2.52e-279
	chr12	118294900	118295120	KSR2	110909	278.4	310.37	0
	chr12	118656290	118656510	PEBP1	82420	26.5	177.52	1.06e-161
	chr12	118981223	118981443	SUDS3	166865	49.7	41.59	1.82e-200
	chr12	119553914	119554134	HSPB8	62462	38	25.39	3.48e-126
	chr12	119807805	119808025	CCDC60	35288	149.4	499.64	0
	chr12	119825893	119826113	CCDC60	53376	249.7	417.64	0
	chr12	120105725	120105945	PRKAB1	0	86.5	144.6	0
	chr12	120339885	120340105	CIT	24790	8.61	28.8	1.25e-30
	chr12	120424817	120425037	CCDC64	2612	36.2	30.27	1.65e-130
	chr12	120884039	120884259	TRIAP1	0	443.6	370.91	0
	chr12	120884039	120884259	GATC	0	443.6	370.91	0
	chr12	121363747	121363967	SPPL3	21592	80.8	90.13	0
	chr12	122335896	122336116	PSMD9	9259	45.3	30.33	2.83e-162
	chr12	122439406	122439626	BCL7A	20236	56.6	27.04	9.83e-194
	chr12	122468031	122468251	BCL7A	8170	22.7	75.83	1.5e-110
	chr12	122479730	122479950	BCL7A	19869	74	49.49	1.45e-315
	chr12	122581349	122581569	MLXIP	64715	93.3	78.03	0
	chr12	122952710	122952930	ZCCHC8	32691	30.2	33.7	8.41e-114
	chr12	123431393	123431613	ABCB9	19444	480.3	267.75	0
	chr12	124052125	124052345	LOC101927415	16530	148.2	99.11	0
	chr12	124529270	124529490	ZNF664	71508	30.6	25.57	5.1e-103
	chr12	124529270	124529490	ZNF664-FAM101A	71508	30.6	25.57	5.1e-103
	chr12	124758241	124758461	FAM101A	15250	173.3	193.2	0
	chr12	124846182	124846402	MIR6880	24394	45.3	50.55	6.53e-195
	chr12	125056679	125056899	NCOR2	4669	57.1	95.52	2.32e-298
	chr12	125073646	125073866	NCOR2	21636	45.3	75.83	4.54e-221
	chr12	125091008	125091228	NCOR2	38998	17.4	116.39	8.95e-97
	chr12	125174135	125174355	NCOR2	122125	35	58.49	3.37e-157
	chr12	125223595	125223815	SCARB1	124705	25	27.82	5.22e-87
	chr12	125423173	125423393	MIR5188	23080	1062.4	592.23	0
	chr12	125713024	125713244	TMEM132B	97919	25	41.73	3.4e-101
	chr12	126117985	126118205	TMEM132B	306823	29.4	32.72	3.12e-109
	chr12	126209897	126210117	LINC00939	257804	18.1	30.27	1.94e-65
	chr12	127380802	127381022	LOC440117	21566	207.6	694.21	0
	chr12	127592311	127592531	LOC101927592	47369	28.5	95.23	3.6e-149
	chr12	128414799	128415019	LINC00507	14844	14.4	24.1	3.2e-48
	chr12	128784546	128784766	MIR3612	5909	13.7	22.92	4.16e-44
	chr12	129389872	129390092	GLT1D1	51791	159.4	66.64	0
	chr12	129537034	129537254	LOC283352	56982	12.3	41.15	1.13e-50
	chr12	130621592	130621812	FZD10-AS1	24412	34.6	23.16	5.8e-111
	chr12	131767476	131767696	LOC338797	64320	91.7	102.28	0
	chr12	132114500	132114720	SFSWAP	80913	32	26.75	1.09e-108
	chr12	132130865	132131085	SFSWAP	64548	70.3	235.13	0
	chr12	132168402	132168622	SFSWAP	27011	119.5	199.86	0
	chr12	132205499	132205719	SFSWAP	9867	132.3	73.77	0
	chr12	132643513	132643733	NOC4L	14520	62.4	208.67	0
	chr12	133054143	133054363	FBRSL1	12795	56.9	38.09	4.55e-222
	chr12	133122607	133122827	MIR6763	35757	18.3	122.27	5.18e-103
	chr12	133721842	133722062	ZNF10	14628	15.5	51.73	2.42e-67
	chr13	19129365	19129585	LINC00417	184655	7.56	50.55	1.17e-33
	chr13	19398923	19399143	ANKRD20A9P	46967	170.1	189.67	0
	chr13	19656238	19656458	RNU6-52P	60665	67.5	112.86	0
	chr13	19923192	19923412	LINC00421	4003	23.4	156.36	1.77e-139
	chr13	20266393	20266613	MPHOSPH8	58605	41.5	69.36	6.92e-197
	chr13	20565814	20566034	ZMYM2	33004	71.7	119.91	0
	chr13	20936887	20937107	MIR4499	70879	202.1	337.99	0
	chr13	21525840	21526060	LINC00367	2273	52.9	35.39	3.66e-200
	chr13	21807373	21807593	SKA3	56632	307.2	128.44	0
	chr13	22125100	22125320	MICU2	53036	83.1	55.61	0
	chr13	23899506	23899726	SACS	49957	52.2	58.19	8.24e-235
	chr13	23967167	23967387	SACS	17485	28.6	31.94	1.06e-104
	chr13	23973499	23973719	SACS-AS1	19392	237.1	158.59	0
	chr13	24030069	24030289	LINC00327	13363	30.9	34.49	7.2e-117
	chr13	24362985	24363205	C1QTNF9B-AS1	99824	130.4	436.16	0
	chr13	25122330	25122550	TPTE2P6	31797	56.9	63.48	2.35e-263
	chr13	25196354	25196574	TPTE2P6	42008	31.5	35.07	5.93e-120
	chr13	25223733	25223953	ATP12A	30597	189.6	105.71	0
	chr13	25425790	25426010	CENPJ	71018	44.5	37.18	9.37e-172
	chr13	25449196	25449416	CENPJ	47612	166.4	139.17	0
	chr13	25796408	25796628	LOC102723318	40938	173.1	144.75	0
	chr13	26062481	26062701	ATP8A2	116272	46.9	156.95	4.96e-277
	chr13	27381123	27381343	GPR12	46201	70.7	118.15	0
	chr13	27488983	27489203	GPR12	154061	215.5	90.08	0
	chr13	27909637	27909857	RASL11A	65173	135.7	226.9	0
	chr13	28345142	28345362	GSX1	21419	99.8	47.7	0
	chr13	31976335	31976555	B3GALTL	202223	28.8	24.1	1.21e-94
	chr13	32739930	32740150	FRY-AS1	134154	180	120.38	0
	chr13	33007011	33007231	N4BP2L1	4696	61.5	51.43	1.82e-265
	chr13	34141038	34141258	RFC3	250949	69.9	77.98	0
	chr13	34515069	34515289	RFC3	122863	242.4	202.65	0
	chr13	34767954	34768174	RFC3	375748	146	69.78	0
	chr13	36173524	36173744	NBEA	122638	54.3	30.27	4.94e-194
	chr13	37376628	37376848	RFXAP	16492	24.3	40.56	5.79e-98
	chr13	37612811	37613031	SUPT20H	20820	34.8	29.1	3.86e-123
	chr13	38489199	38489419	TRPC4	45260	85.2	285.09	0
	chr13	38530700	38530920	TRPC4	86761	108.3	90.52	0
	chr13	38764295	38764515	LINC00571	46926	85.8	143.43	0
	chr13	38920947	38921167	UFM1	2742	180.8	151.22	0
	chr13	39092554	39092774	LINC00366	49088	47.3	158.12	2e-281
	chr13	39495298	39495518	STOML3	69479	60.5	50.55	2.41e-260
	chr13	39819929	39820149	NHLRC3	207481	20	22.34	1.32e-64
	chr13	40086941	40087161	LHFP	90196	23.9	79.94	4.16e-118
	chr13	40746444	40746664	LINC00332	9283	37.8	63.19	4.93e-175
	chr13	40807847	40808067	LINC00548	13208	80.5	269.22	0
	chr13	40907451	40907671	LINC00548	112812	281.6	188.34	0
	chr13	40959725	40959945	LINC00598	95199	113	188.98	0
	chr13	41719726	41719946	LOC101929140	12662	90.3	100.71	0
	chr13	41976733	41976953	OR7E37P	39748	130.4	109.04	0
	chr13	42377234	42377454	VWA8	157768	328.1	182.91	0
	chr13	43480458	43480678	EPSTI1	85730	40.1	44.67	2.2e-166
	chr13	43577234	43577454	EPSTI1	10827	109.8	73.48	0
	chr13	45413097	45413317	LINC00330	29331	16.7	27.92	3.98e-58
	chr13	45710956	45711176	GTF2F2	16325	105.4	58.78	0
	chr13	46347428	46347648	SPERT	70989	371.5	177.52	0
	chr13	46988651	46988871	KIAA0226L	27016	36.7	245.71	1.16e-240
	chr13	47189806	47190026	LRCH1	62510	184.2	44	0
	chr13	48205887	48206107	SUCLA2	369356	40.6	271.57	5.18e-272
	chr13	48453904	48454124	SUCLA2	121339	33.7	56.43	3.62e-150
	chr13	48640771	48640991	MED4-AS1	10283	483.1	3231.82	0
	chr13	48646495	48646715	MED4-AS1	4559	231.6	387.37	0
	chr13	48705673	48705893	MED4	36396	47.8	53.3	1.25e-208
	chr13	48730706	48730926	MED4	61429	56.6	94.64	2.11e-294
	chr13	49193280	49193500	LINC00462	38243	45	50.16	3.29e-193
	chr13	50787795	50788015	ST13P4	41641	232.7	129.71	0
	chr13	50835816	50836036	ST13P4	89662	56.9	27.21	3.62e-195
	chr13	50997975	50998195	ST13P4	251821	44.8	37.47	2.52e-173
	chr13	51103551	51103771	DLEU7-AS1	278221	507	423.96	0
	chr13	51305642	51305862	DLEU7-AS1	76130	120.9	404.42	0
	chr13	51330383	51330603	DLEU7-AS1	51389	38	42.32	2.82e-153
	chr13	52171047	52171267	WDFY2	12563	90.3	75.53	0
	chr13	52400809	52401029	LINC00282	18258	29.9	33.31	9.45e-111
	chr13	52461584	52461804	CCDC70	25467	19.5	65.25	4.53e-92
	chr13	52600779	52600999	UTP14C	1952	48.5	81.12	6.51e-242
	chr13	52785552	52785772	MRPS31P5	16950	238.7	199.56	0
	chr13	52989187	52989407	THSD1	8558	37.4	62.6	3.11e-173
	chr13	53168932	53169152	HNRNPA1L2	22454	19	31.74	6.5e-70
	chr13	55224354	55224574	MIR1297	338171	6.68	44.67	1.29e-28
	chr13	55893001	55893221	MIR5007	144412	150.4	251.59	0
	chr13	56098588	56098808	MIR5007	349999	13	87	1.14e-66
	chr13	56140167	56140387	MIR5007	391578	10	67.01	8.13e-48
	chr13	56998469	56998689	PRR20E	729507	38	253.94	3.01e-250
	chr13	57086532	57086752	PRR20E	641444	73.8	246.88	0
	chr13	57135588	57135808	PRR20E	592388	3.87	25.86	3.09e-13
	chr13	57473017	57473237	PRR20E	254959	20	33.51	5.64e-76
	chr13	59564564	59564784	LOC101926897	824603	141	471.43	0
	chr13	60505822	60506042	DIAPH3-AS1	81396	20.9	34.98	4.81e-79
	chr13	62208655	62208875	PCDH20	219000	59.9	400.89	0
	chr13	62953025	62953245	LINC00358	349344	14.1	47.03	1.45e-60
	chr13	64170001	64170221	OR7E156P	141348	16.5	55.25	2.95e-74
	chr13	64991859	64992079	LINC00395	679708	21.3	35.56	3.86e-82
	chr13	67951722	67951942	PCDH9	147254	23.4	78.18	3.29e-116
	chr13	68479532	68479752	PCDH9	675064	9.49	63.48	3.43e-44
	chr13	68872258	68872478	LINC00550	586980	41.8	46.63	1.11e-174
	chr13	69282574	69282794	LINC00550	176664	13.5	22.63	4.16e-44
	chr13	69286118	69286338	LINC00550	173120	26.5	44.38	2.31e-109
	chr13	69361278	69361498	LINC00550	97960	9.49	63.48	3.43e-44
	chr13	69684024	69684244	LINC00550	224567	43.1	72.01	5.51e-208
	chr13	70562016	70562236	ATXN8OS	119110	32.9	54.96	6.2e-145
	chr13	71385853	71386073	LINC00348	203201	19.5	130.5	1.99e-111
	chr13	72058328	72058548	DACH1	382783	13.7	91.7	1.44e-70
	chr13	72671788	72672008	DACH1	230458	159.6	533.74	0
	chr13	73164366	73164586	BORA	137302	7.03	47.03	2.8e-30
	chr13	73328276	73328496	MZT1	26338	15.3	102.28	1.74e-82
	chr13	73607998	73608218	KLF5	24713	12.5	83.47	8.25e-63
	chr13	73861185	73861405	KLF5	228255	24.4	40.85	5.79e-98
	chr13	74003923	74004143	LINC00392	134239	30.6	25.57	5.1e-103
	chr13	74087973	74088193	LINC00392	50189	241.8	1617.67	0
	chr13	74177876	74178096	LINC00392	39495	72.6	121.38	0
	chr13	74251517	74251737	LINC00392	113136	8.79	58.78	1.28e-40
	chr13	75789116	75789336	CTAGE11P	25182	42.9	47.81	2.23e-181
	chr13	76146012	76146232	UCHL3	22396	40.6	67.89	2.22e-191
	chr13	76627404	76627624	LMO7DN	182230	10.2	34.09	1.28e-39
	chr13	77096245	77096465	KCTD12	364076	119.3	79.83	0
	chr13	77692038	77692258	MYCBP2-AS1	42389	8.79	58.78	1.28e-40
	chr13	79084305	79084525	POU4F1	93171	16.3	109.33	1.46e-88
	chr13	80065980	80066200	NDFIP2-AS1	10614	7.73	51.73	1.17e-33
	chr13	80366939	80367159	LINC00382	79563	19.5	130.5	1.99e-111
	chr13	80847615	80847835	SPRY2	67252	13.2	88.17	1.3e-68
	chr13	81673900	81674120	SPRY2	758814	21.6	36.15	1.07e-83
	chr13	84284335	84284555	SLITRK1	171974	79.4	66.42	0
	chr13	84515897	84516117	SLITRK1	59369	199.5	667.17	0
	chr13	85682602	85682822	LINC00351	254917	39.2	43.69	1.91e-161
	chr13	86470769	86470989	SLITRK6	97286	27.4	45.85	2.53e-114
	chr13	86731635	86731855	SLITRK6	358152	13.2	44.09	1.42e-55
	chr13	87236009	87236229	SLITRK6	862526	33.4	223.37	1.33e-214
	chr13	87702073	87702293	MIR4500	568703	12	39.97	1.85e-47
	chr13	87859074	87859294	MIR4500	411702	14.1	47.03	1.45e-60
	chr13	88179399	88179619	MIR4500	91377	9.31	62.31	3.43e-44
	chr13	88982891	88983111	LINC00433	209974	26.7	178.7	5.94e-164
	chr13	89058023	89058243	LINC00433	134842	26.7	44.67	5.19e-111
	chr13	89890836	89891056	LINC00353	325612	46	154.01	1.2e-272
	chr13	90266732	90266952	LINC00353	50065	9.84	65.84	5.37e-46
	chr13	91003243	91003463	MIR622	119807	31.8	35.46	1.68e-121
	chr13	91244250	91244470	LINC01049	98708	46.4	155.18	7.73e-275
	chr13	93869919	93870139	GPC6	8940	110.2	368.56	0
	chr13	94997678	94997898	DCT	134039	155	518.45	0
	chr13	95585574	95585794	LOC101927284	172379	38.3	128.14	9.61e-217
	chr13	96138227	96138447	CLDN10-AS1	47718	18.1	30.27	1.94e-65
	chr13	96165328	96165548	CLDN10-AS1	20617	12.1	40.56	4.62e-49
	chr13	96400820	96401040	DNAJC3	71427	23	38.5	1.45e-91
	chr13	97872738	97872958	MBNL2	1593	25.3	28.22	1.86e-88
	chr13	98424773	98424993	IPO5	180937	57.1	63.68	3.69e-265
	chr13	99271904	99272124	STK24	97525	5.98	39.97	9.51e-24
	chr13	99311953	99312173	SLC15A1	92757	143.2	479.07	0
	chr13	99486891	99487111	DOCK9-AS1	2553	132.2	221.02	0
	chr13	100702737	100702957	PCCA	38313	64	427.93	0
	chr13	100737157	100737377	PCCA	3893	41.5	69.36	6.92e-197
	chr13	100881667	100881887	PCCA	140398	20	67.01	1.02e-95
	chr13	100911182	100911402	PCCA	169913	24.8	82.88	7.83e-124
	chr13	101451358	101451578	NALCN-AS1	90779	25.3	42.32	8.09e-103
	chr13	101599179	101599399	LINC00411	2561	27.1	30.17	3.02e-97
	chr13	101861580	101861800	NALCN	207014	67	111.98	0
	chr13	103339977	103340197	METTL21C	6675	95.8	640.72	0
	chr13	103699113	103699333	SLC10A2	19864	6.33	42.32	5.66e-27
	chr13	104200362	104200582	MIR548AS	265514	43.8	146.37	3.15e-255
	chr13	104355132	104355352	MIR548AS	420284	41.3	27.63	2.9e-143
	chr13	104657014	104657234	MIR548AS	722166	57.6	385.61	0
	chr13	107513393	107513613	LINC00443	207165	22.5	37.62	2.12e-88
	chr13	107629202	107629422	LINC00443	322974	14.2	95.23	1.67e-74
	chr13	109356200	109356420	MYO16	74629	16	53.49	8.77e-71
	chr13	109406382	109406602	MYO16	124811	23	25.67	1.95e-78
	chr13	109624958	109625178	MYO16-AS1	194474	27.6	46.14	5.51e-116
	chr13	110775313	110775533	COL4A1	183964	104	173.99	0
	chr13	111604715	111604935	ANKRD10	37261	119.7	800.61	0
	chr13	112592442	112592662	LINC00403	33963	35.3	39.38	2.18e-140
	chr13	112766309	112766529	SOX1	44396	37.3	124.62	2.46e-208
	chr13	112844325	112844545	LINC01070	7103	87.7	146.66	0
	chr13	113952964	113953184	LAMP1	1495	29.4	32.72	3.12e-109
	chr13	113959538	113959758	LAMP1	8069	61.3	68.38	1.2e-290
	chr13	114540296	114540516	GAS6-AS1	21713	448.5	1500.11	0
	chr13	114907109	114907329	RASA3	9014	34.8	232.78	2.15e-226
	chr13	115054415	115054635	UPF3A	7356	8.79	29.39	4.3e-32
	chr13	115109599	115109819	CHAMP1	29634	157.6	527.27	0
	chr14	19084093	19084313	OR11H12	293282	31.1	34.68	2.08e-118
	chr14	19823958	19824178	DUXAP10	101157	6.68	22.34	3.42e-22
	chr14	20869370	20869590	TEP1	11990	41.8	34.98	9.52e-158
	chr14	21220189	21220409	EDDM3A	6090	451.3	503.17	0
	chr14	21288593	21288813	RNASE1	17557	96	160.47	0
	chr14	21441443	21441663	METTL17	16303	43.4	145.19	4.6e-253
	chr14	21510234	21510454	RNASE7	0	54.1	45.26	4.84e-225
	chr14	21565412	21565632	TMEM253	1465	165.9	277.45	0
	chr14	21566898	21567118	TMEM253	0	58.2	38.91	2.07e-228
	chr14	21998776	21998996	SALL2	4234	21.1	35.27	1.37e-80
	chr14	23005984	23006204	DAD1	51940	277.9	464.67	0
	chr14	24101111	24101331	DHRS2	4243	515.5	431.02	0
	chr14	24139794	24140014	DHRS2	34221	282.1	188.69	0
	chr14	24193178	24193398	DHRS2	87605	36.6	24.45	1.34e-120
	chr14	24629125	24629345	IRF9	1078	20	67.01	1.02e-95
	chr14	24865577	24865797	NYNRIN	2196	397.9	332.7	0
	chr14	25011477	25011697	CTSG	33770	32	35.66	1.68e-121
	chr14	26529247	26529467	NOVA1	537494	27.4	91.7	2.75e-141
	chr14	26927132	26927352	NOVA1	139609	40.8	136.37	1.01e-233
	chr14	30722263	30722483	G2E3	305847	57.1	31.84	5.86e-209
	chr14	30765228	30765448	G2E3	262882	18.8	125.79	4.18e-105
	chr14	31931686	31931906	DTD2	5006	35.5	39.58	2.18e-140
	chr14	32334780	32335000	ARHGAP5-AS1	210906	36.6	40.76	8.36e-147
	chr14	32490189	32490409	ARHGAP5-AS1	55497	181.5	202.4	0
	chr14	32555278	32555498	ARHGAP5	8783	75.9	126.97	0
	chr14	32593772	32593992	ARHGAP5	47277	34.4	23.04	5.8e-111
	chr14	32814604	32814824	AKAP6	16125	562.8	627.4	0
	chr14	33029394	33029614	AKAP6	230915	102.1	56.92	0
	chr14	33347588	33347808	NPAS3	60652	14.9	49.96	6.17e-64
	chr14	34504990	34505210	EGLN3	84706	50.4	28.12	5.46e-175
	chr14	34767038	34767258	SPTSSA	164211	1121.1	374.97	0
	chr14	35214489	35214709	CFL2	30460	30.6	102.28	3.86e-163
	chr14	35310627	35310847	BAZ1A	34007	37.4	62.6	3.11e-173
	chr14	35683635	35683855	PSMA6	63910	193.7	92.54	0
	chr14	35964454	35964674	INSM2	38575	133	148.33	0
	chr14	36139248	36139468	INSM2	136000	38.1	63.78	7.76e-177
	chr14	36289299	36289519	BRMS1L	6079	38.5	32.18	5.68e-141
	chr14	36719388	36719608	MBIP	70275	15.8	52.9	4.65e-69
	chr14	37290198	37290418	MIR4503	131179	333.7	279.07	0
	chr14	37414066	37414286	MIR4503	7311	116.5	64.95	0
	chr14	37917431	37917651	FOXA1	146675	34.3	229.25	1.15e-221
	chr14	37950073	37950293	FOXA1	114033	63.1	70.34	1.06e-301
	chr14	38086124	38086344	FOXA1	21799	124.3	83.12	0
	chr14	38189426	38189646	FOXA1	125101	54.5	30.37	1.63e-195
	chr14	39493017	39493237	SEC23A	79201	363.6	304.05	0
	chr14	39657390	39657610	PNN	13003	198.8	110.8	0
	chr14	40137533	40137753	FBXO33	235829	108.8	72.77	0
	chr14	40916382	40916602	LOC644919	507315	49.4	33.04	2.74e-183
	chr14	41607033	41607253	LOC644919	183117	101.9	170.47	0
	chr14	44090567	44090787	FSCB	885713	147.8	164.78	0
	chr14	44114432	44114652	FSCB	861848	78.2	65.39	0
	chr14	44577824	44578044	FSCB	398456	170.7	142.69	0
	chr14	45824899	45825119	MIS18BP1	102294	37.3	31.15	5.68e-135
	chr14	46184599	46184819	MIS18BP1	461994	88.4	295.67	0
	chr14	46254590	46254810	MIS18BP1	531985	1221.1	816.83	0
	chr14	46262350	46262570	MIS18BP1	539745	568	237.48	0
	chr14	46667005	46667225	LINC00871	273338	63.6	106.39	0
	chr14	48603670	48603890	LINC00648	339453	22.1	37.03	7.94e-87
	chr14	48962788	48963008	LINC00648	698571	27.6	30.76	3.25e-100
	chr14	49030774	49030994	LINC00648	766557	13.2	44.09	1.42e-55
	chr14	50417622	50417842	MIR6076	15276	98.6	164.88	0
	chr14	51067002	51067222	ATL1	67202	819.5	913.66	0
	chr14	51590234	51590454	TRIM9	27812	103.5	86.56	0
	chr14	52236071	52236291	FRMD6	52070	105.8	707.73	0
	chr14	53068660	53068880	GPR137C	48794	56.2	47.03	1.07e-236
	chr14	53650943	53651163	LOC101927620	30871	132	63.06	0
	chr14	53879591	53879811	LOC101927620	259519	33.4	37.23	2.65e-129
	chr14	53958372	53958592	LOC101927620	338300	60.6	33.8	1.23e-225
	chr14	54021356	54021576	MIR5580	393627	155.4	103.93	0
	chr14	54118871	54119091	MIR5580	296112	42.7	47.61	1.06e-179
	chr14	54618629	54618849	BMP4	197359	28.8	192.8	7.72e-180
	chr14	55679501	55679721	DLGAP5	21105	48	53.49	2.35e-210
	chr14	56172426	56172646	RPL13AP3	60318	63.8	35.56	1.41e-242
	chr14	56351506	56351726	LINC00520	88114	25.7	42.91	1.9e-104
	chr14	57133080	57133300	TMEM260	86569	299.8	250.7	0
	chr14	57552786	57553006	AP5M1	182601	35.1	29.39	1.32e-124
	chr14	57743052	57743272	EXOC5	7435	35.9	29.98	1.5e-127
	chr14	58004130	58004350	C14orf105	43549	35.7	29.83	1.5e-127
	chr14	58876835	58877055	TOMM20L	14191	53.8	44.97	9.85e-222
	chr14	59778441	59778661	DAAM1	48282	69.8	58.34	3.66e-314
	chr14	61345925	61346145	TRMT5	101653	187.2	104.34	0
	chr14	61592549	61592769	SLC38A6	144717	298.6	332.9	0
	chr14	61990541	61990761	LOC101927780	46152	62.4	69.56	3.65e-296
	chr14	62431803	62432023	SYT16	30519	141.5	118.3	0
	chr14	63158954	63159174	KCNH5	352783	76.8	36.7	2.42e-294
	chr14	63201618	63201838	KCNH5	310119	42.4	35.42	7.72e-161
	chr14	64144636	64144856	WDR89	35995	57.3	23.95	5.85e-186
	chr14	64240327	64240547	SGPP1	45571	490.9	547.26	0
	chr14	64527286	64527506	SYNE2	153354	86.5	57.84	0
	chr14	65147064	65147284	PLEKHG3	23910	55.5	61.92	2.27e-254
	chr14	65472272	65472492	FNTB	18765	167.8	112.27	0
	chr14	66480921	66481141	LINC00238	471949	33.9	113.45	1.66e-185
	chr14	66482315	66482535	LINC00238	470555	47.5	39.68	1.35e-187
	chr14	66571279	66571499	LINC00238	381591	92.4	309.19	0
	chr14	66970306	66970526	GPHN	3600	180.1	120.5	0
	chr14	67399416	67399636	FAM71D	256475	1149.4	961.08	0
	chr14	67944795	67945015	TMEM229B	37007	180.5	201.23	0
	chr14	68571439	68571659	RAD51B	284943	26.5	22.19	9.9e-84
	chr14	68607124	68607344	RAD51B	320628	141.7	94.76	0
	chr14	69103341	69103561	ZFP36L1	159400	27.6	23.07	3.77e-89
	chr14	69307101	69307321	ZFP36L1	44141	23.4	26.06	7.51e-80
	chr14	69454987	69455207	ACTN1-AS1	8588	317.4	265.4	0
	chr14	69535180	69535400	DCAF5	84515	16.5	27.63	3.98e-58
	chr14	69573186	69573406	DCAF5	46509	52.2	58.19	8.24e-235
	chr14	69818226	69818446	ERH	46576	86.1	57.61	0
	chr14	69894422	69894642	SLC39A9	29326	125.8	140.29	0
	chr14	70079606	70079826	KIAA0247	1296	97	64.89	0
	chr14	70179912	70180132	SRSF5	53703	191.6	320.36	0
	chr14	70466125	70466345	SMOC1	120011	39.7	33.21	5.01e-147
	chr14	70477899	70478119	SMOC1	131785	309	516.69	0
	chr14	70914011	70914231	ADAM21	4644	54.5	26.03	9.2e-184
	chr14	71331836	71332056	PCNX	42067	203.5	226.9	0
	chr14	71339276	71339496	PCNX	34627	25.3	84.65	1.12e-127
	chr14	71543289	71543509	PCNX	169167	397.4	664.53	0
	chr14	72030710	72030930	SIPA1L1	22069	75	50.2	1.18e-320
	chr14	72240775	72240995	RGS6	157823	458.7	767.1	0
	chr14	72441617	72441837	RGS6	42800	27.9	46.73	1.18e-117
	chr14	72904514	72904734	MIR7843	78795	40.4	135.2	1.38e-231
	chr14	73308880	73309100	DPF3	51725	17	28.51	4.98e-61
	chr14	73995130	73995350	ACOT1	8579	16.7	111.69	1.33e-90
	chr14	74339767	74339987	ZNF410	13332	49.4	41.29	7.57e-199
	chr14	74471733	74471953	ENTPD5	14074	38.5	257.46	4.62e-255
	chr14	75089685	75089905	LTBP2	10651	26.9	22.48	4.45e-85
	chr14	75378246	75378466	RPS6KL1	10680	53.8	29.98	4.47e-191
	chr14	75419787	75420007	PGF	2461	104.9	116.98	0
	chr14	75721809	75722029	FOS	23453	56.9	31.74	1.87e-207
	chr14	76860180	76860400	ESRRB	22490	72.2	120.8	0
	chr14	77425688	77425908	IRF2BPL	69135	265.2	295.67	0
	chr14	79507114	79507334	NRXN3	238349	80.7	269.81	0
	chr14	79626059	79626279	NRXN3	119404	65.4	72.89	1.10e-314
	chr14	80280221	80280441	DIO2-AS1	397322	37.4	41.73	1.18e-151
	chr14	80296363	80296583	DIO2-AS1	381180	12.7	84.65	9.82e-65
	chr14	81765401	81765621	GTF2A1	77826	37.6	25.16	8.76e-125
	chr14	81838207	81838427	STON2	55322	194	324.47	0
	chr14	81880550	81880770	STON2	12979	19.7	32.92	6.24e-73
	chr14	81946981	81947201	LOC100506700	30480	16.9	56.43	5.27e-76
	chr14	82473136	82473356	LOC101928559	383731	18.3	61.13	7.37e-85
	chr14	82666368	82666588	LOC101928559	576963	20.6	68.77	1.51e-97
	chr14	83090976	83091196	LOC101928559	1001571	16.5	110.51	1.33e-90
	chr14	86394807	86395027	LOC101928767	5996	7.91	26.45	9.47e-28
	chr14	87680793	87681013	LOC283585	308671	129.2	108.01	0
	chr14	87699872	87700092	LOC283585	327750	69.9	77.98	0
	chr14	88954450	88954670	PTPN21	66454	30.8	25.72	5.1e-103
	chr14	89608256	89608476	FOXN3	274979	62.7	34.98	2.18e-236
	chr14	89895231	89895451	FOXN3-AS1	11533	191.6	320.36	0
	chr14	89976186	89976406	FOXN3-AS2	66155	14.1	23.51	7.68e-47
	chr14	90867688	90867908	CALM1	4361	46.9	26.16	8.5e-158
	chr14	91035974	91036194	LOC101928909	72780	25.7	42.91	1.9e-104
	chr14	91337404	91337624	TTC7B	54643	111.6	93.32	0
	chr14	91350144	91350364	TTC7B	67383	100.4	67.13	0
	chr14	91553750	91553970	C14orf159	26388	64.9	433.81	0
	chr14	91591140	91591360	SNORA11B	1411	138.3	231.31	0
	chr14	91862450	91862670	CCDC88C	21519	53.6	25.61	1.59e-179
	chr14	91975764	91975984	SMEK1	841	267.8	895.83	0
	chr14	92569812	92570032	ATXN3	2934	214.8	359.16	0
	chr14	92642911	92643131	CPSF2	54613	72.6	34.68	1.29e-272
	chr14	93064915	93065135	RIN3	84790	243.2	90.39	0
	chr14	93102902	93103122	LGMN	111926	30.6	25.57	5.1e-103
	chr14	94786664	94786884	SERPINA6	2805	98.6	65.95	0
	chr14	94801281	94801501	SERPINA6	11593	52.2	58.19	8.24e-235
	chr14	94911944	94912164	SERPINA11	6959	146.6	122.56	0
	chr14	94933182	94933402	SERPINA9	9269	78.4	131.08	0
	chr14	95678933	95679153	DICER1	54586	25.3	28.22	1.86e-88
	chr14	95731957	95732177	CLMN	54069	71.7	29.98	1.41e-254
	chr14	96220099	96220319	TCL1A	39566	21.1	23.51	1.09e-68
	chr14	96553187	96553407	C14orf132	47526	35.9	23.98	1.9e-116
	chr14	96946755	96946975	PAPOLA	21739	115.8	64.56	0
	chr14	98543606	98543826	C14orf64	99145	120.9	134.81	0
	chr14	98700177	98700397	C14orf64	255716	109.8	52.48	0
	chr14	98825905	98826125	C14orf177	351826	33.9	56.72	6.41e-152
	chr14	98964753	98964973	C14orf177	212978	37.6	31.45	1.82e-136
	chr14	99375655	99375875	C14orf177	197705	28.8	96.4	3.75e-151
	chr14	99380205	99380425	C14orf177	202255	40.8	136.37	1.01e-233
	chr14	99927176	99927396	SETD3	19831	36.2	24.22	3.27e-119
	chr14	99950562	99950782	CCNK	2823	168	80.28	0
	chr14	100565678	100565898	EVL	33927	57.3	63.88	3.69e-265
	chr14	100573722	100573942	EVL	41971	41.5	27.74	2.9e-143
	chr14	100611456	100611676	DEGS2	14337	26.5	44.38	2.31e-109
	chr14	100613260	100613480	DEGS2	12533	28.5	190.45	1.48e-177
	chr14	100786877	100787097	SLC25A47	2583	144.8	161.45	0
	chr14	100864484	100864704	WDR25	21651	128.8	143.62	0
	chr14	102522035	102522255	HSP90AA1	31258	32.9	36.64	3.6e-126
	chr14	102657098	102657318	MOK	49641	87	72.74	0
	chr14	103453674	103453894	AMN	64681	532.7	197.96	0
	chr14	103631126	103631346	LINC00605	24020	23.7	158.71	1.12e-141
	chr14	103710472	103710692	LINC00605	55107	779.3	434.4	0
	chr14	103824326	103824546	SNORA28	20140	94.6	31.62	0
	chr14	104571023	104571243	MIR203A	12500	46.4	77.59	1.31e-228
	chr14	104901348	104901568	C14orf180	145911	36.2	60.55	4.52e-166
	chr14	105449148	105449368	C14orf79	3249	141	78.57	0
	chr14	105775654	105775874	PACS2	4879	46.7	52.12	1.83e-203
	chr14	105820668	105820888	BRF1	38754	65.9	73.48	2.05e-318
	chr14	106021729	106021949	TMEM121	28776	89.1	59.6	0
	chr14	106034559	106034779	TMEM121	41606	161.7	54.08	0
	chr14	106041738	106041958	MIR8071-1	45496	4.22	28.22	4.25e-16
	chr14	106142108	106142328	ELK2AP	2964	92.3	308.6	0
	chr14	106154125	106154345	ELK2AP	14981	145.5	121.68	0
	chr14	106484069	106484289	ADAM6	45711	19.7	32.92	6.24e-73
	chr14	106643852	106644072	LINC00226	100198	51.8	57.8	4.78e-233
	chr14	106667162	106667382	LINC00226	76888	130.1	72.5	0
	chr14	106787788	106788008	LINC00226	43519	54.8	45.85	2.32e-228
	chr14	107051479	107051699	LINC00221	113034	24.6	164.59	2.64e-148
	chr14	107068089	107068309	LINC00221	129644	52	34.8	1.57e-195
	chr14	107102161	107102381	LINC00221	163716	15.8	52.9	4.65e-69
	chr15	20065074	20065294	CHEK2P2	422704	10.2	68.19	1.2e-49
	chr15	20226428	20226648	CHEK2P2	261350	3.87	25.86	3.09e-13
	chr15	20886042	20886262	NBEAP1	75219	7.91	26.45	9.47e-28
	chr15	20994214	20994434	NBEAP1	32734	42.2	70.54	2.02e-202
	chr15	21233151	21233371	LINC01193	87384	5.45	36.44	3.61e-22
	chr15	21892564	21892784	LOC646214	47956	45.2	302.14	2.46e-311
	chr15	21926065	21926285	LOC646214	14455	146.2	978.13	0
	chr15	22302014	22302234	LOC101927079	979	20	134.02	1.13e-115
	chr15	22486752	22486972	REREP3	59594	61.3	34.19	3.12e-230
	chr15	22921356	22921576	CYFIP1	34180	60.8	67.79	5.57e-287
	chr15	23667309	23667529	GOLGA8S	67414	31.6	52.9	5.17e-138
	chr15	24928104	24928324	NPAP1	7563	7.03	47.03	2.8e-30
	chr15	25103954	25104174	SNURF	95897	107.6	179.87	0
	chr15	25230524	25230744	SNORD64	277	17.2	28.8	4.98e-61
	chr15	25379731	25379951	PWAR1	839	20.9	139.9	6e-120
	chr15	26367977	26368197	LINC00929	7017	15.1	101.1	1.77e-80
	chr15	26807167	26807387	GABRB3	210837	38.8	129.91	7.45e-219
	chr15	26841101	26841321	GABRB3	176903	11.6	38.8	7.22e-46
	chr15	27939844	27940064	OCA2	404395	109.1	182.52	0
	chr15	28253407	28253627	OCA2	90832	14.8	98.75	1.77e-78
	chr15	29387016	29387236	APBA2	173176	54.3	60.55	3.18e-247
	chr15	29894793	29895013	FAM189A1	31866	44.3	49.38	8.17e-190
	chr15	29983299	29983519	FAM189A1	120372	64.7	54.08	2.07e-284
	chr15	30038624	30038844	TJP1	75863	200.5	95.81	0
	chr15	30228024	30228244	TJP1	113318	18.5	61.72	7.37e-85
	chr15	31302321	31302541	MTMR10	18514	25.5	85.23	1.32e-129
	chr15	31442961	31443181	TRPM1	49032	228.1	190.75	0
	chr15	31676824	31677044	KLF13	57741	38.3	64.07	1.21e-178
	chr15	31751195	31751415	KLF13	132112	8.08	27.04	3.5e-29
	chr15	33437835	33438055	FMN1	77602	232.5	777.68	0
	chr15	33779537	33779757	RYR3	176360	34.4	57.61	1.96e-155
	chr15	34131828	34132048	CHRM5	129042	21.1	70.54	3.12e-101
	chr15	35024710	35024930	GJD2	21853	186.3	155.77	0
	chr15	35548773	35548993	ANP32AP1	19246	117.6	196.62	0
	chr15	35581383	35581603	ANP32AP1	51856	22.3	74.65	1.13e-108
	chr15	35727525	35727745	MIR3942	62960	28.3	47.32	2.52e-119
	chr15	35800531	35800751	DPH6-AS1	37646	161.5	135.05	0
	chr15	36160945	36161165	MIR4510	57893	77.3	258.64	0
	chr15	36298122	36298342	MIR4510	79065	32.7	54.67	6.2e-145
	chr15	36807735	36807955	C15orf41	63850	25.7	42.91	1.9e-104
	chr15	39040976	39041196	C15orf53	52177	22.8	38.21	5.57e-90
	chr15	39848752	39848972	THBS1	24309	23.9	159.89	1.12e-141
	chr15	40134973	40135193	FSIP1	59934	38.5	42.91	1.56e-156
	chr15	40294692	40294912	SRP14	36478	85.6	95.42	0
	chr15	40548542	40548762	PAK6	3163	18.5	61.72	7.37e-85
	chr15	40610483	40610703	PLCB2	10309	17.9	119.91	7.59e-99
	chr15	40614543	40614763	PLCB2	14369	22.8	76.42	1.98e-112
	chr15	40760778	40760998	CHST14	2163	17.4	58.19	1.59e-79
	chr15	40958611	40958831	RAD51-AS1	28473	10.4	34.68	1.28e-39
	chr15	41329468	41329688	INO80	78757	51.1	57.02	1.58e-229
	chr15	41352804	41353024	INO80	55421	28.1	31.35	3.34e-103
	chr15	41499963	41500183	EXD1	22773	17	114.04	1.04e-94
	chr15	42083177	42083397	MAPKBP1	16545	24.4	40.85	5.79e-98
	chr15	42323511	42323731	PLA2G4E	19171	49.9	83.47	1.42e-249
	chr15	42444415	42444635	PLA2G4F	4205	16.9	28.22	1.42e-59
	chr15	42879606	42879826	STARD9	11749	16	53.49	8.77e-71
	chr15	42935021	42935241	STARD9	67164	4.92	32.92	4.42e-19
	chr15	42963747	42963967	CDAN1	65451	152.9	1022.8	0
	chr15	43137917	43138137	TTBK2	74871	17.4	58.19	1.59e-79
	chr15	43511527	43511747	EPB42	1577	16.5	27.63	3.98e-58
	chr15	43531023	43531243	EPB42	17700	23.6	157.53	1.77e-139
	chr15	44937901	44938121	SPG11	17756	152	254.23	0
	chr15	45174756	45174976	C15orf43	73925	28.6	31.94	1.06e-104
	chr15	45351006	45351226	SORD	35704	25.7	171.64	5.57e-155
	chr15	45375528	45375748	DUOX2	30612	58.7	65.44	3.26e-274
	chr15	45399798	45400018	DUOX2	6342	30.1	100.52	3.98e-159
	chr15	46095778	46095998	SQRDL	172432	10.4	34.68	1.28e-39
	chr15	46159576	46159796	SQRDL	236230	15.8	105.81	1.67e-84
	chr15	46361845	46362065	SQRDL	438499	13.7	45.85	3.14e-57
	chr15	46977410	46977630	SEMA6D	1033057	12.8	42.91	2.68e-52
	chr15	47641484	47641704	SEMA6D	368983	17.6	29.39	1.72e-62
	chr15	47901462	47901682	SEMA6D	109005	13.7	91.7	1.44e-70
	chr15	48310123	48310343	SLC24A5	102827	26.4	176.35	1.06e-161
	chr15	48325229	48325449	SLC24A5	87721	14.8	49.38	6.17e-64
	chr15	48976608	48976828	FBN1	38623	29.7	33.11	9.45e-111
	chr15	49052127	49052347	CEP152	50997	53.3	89.05	8.41e-273
	chr15	49160232	49160452	EID1	9839	126.4	422.64	0
	chr15	49558259	49558479	GALK2	96046	71.4	47.73	2.2e-300
	chr15	49917935	49918155	DTWD1	4709	726.9	303.9	0
	chr15	51090194	51090414	SPPL2A	32284	467	173.54	0
	chr15	51372546	51372766	TNFAIP8L3	24708	154.7	73.9	0
	chr15	51608308	51608528	CYP19A1	22268	48.9	23.34	2.68e-157
	chr15	52031309	52031529	LYSMD2	989	85.1	40.64	0
	chr15	52156765	52156985	TMOD3	34940	576.3	160.62	0
	chr15	52369237	52369457	BCL2L10	35516	87.7	22.56	3.82e-277
	chr15	52627097	52627317	MYO5C	39102	197.2	73.28	0
	chr15	52632900	52633120	MYO5C	44905	321.8	215.26	0
[truncated: 4,422 more rows]

## Sheet: SJSA
TP53 ChIP-seq - SJSA - HOMER Peak Results (Nutlin vs. Input)
	Chromosome	Start	End	Closest gene (by TSS) ID	Distance peak to TSS	Normalized read count	Fold change (vs input)	p-value (vs input)
	chr1	818394	818604	FAM41C	6212	27.6	36.24	1.07e-83
	chr1	1153324	1153534	TNFRSF4	3776	15.8	82.7	8.25e-63
	chr1	1186331	1186541	FAM132A	4229	54.9	288.93	4.9e-294
	chr1	1356776	1356986	ANKRD65	0	11.1	58.19	1.28e-40
	chr1	1400296	1400506	ATAD3B	6659	9.74	25.52	2.47e-26
	chr1	1805987	1806197	GNB1	16360	13.6	35.73	3.66e-41
	chr1	1838994	1839204	CALML6	7063	39.3	51.56	1.41e-134
	chr1	3514845	3515055	MEGF6	13005	14	73.51	2.37e-53
	chr1	3588562	3588772	WRAP73	21891	22.6	19.74	5.34e-54
	chr1	5143959	5144169	AJAP1	428854	39.1	103.11	3.75e-165
	chr1	6134348	6134558	KCNAB2	28367	30.2	39.56	9.38e-95
	chr1	6427746	6427956	ACOT7	6982	37.2	48.75	2.28e-124
	chr1	6474664	6474874	HES2	5106	130.8	171.77	0
	chr1	6618820	6619030	TAS1R1	3482	38.2	202.15	2.54e-191
	chr1	8284736	8284946	SLC45A1	93200	20.1	106.18	1.58e-86
	chr1	8427573	8427783	SLC45A1	49428	18.9	24.76	1.3e-49
	chr1	8600383	8600593	RERE	116636	33.1	21.82	2.18e-82
	chr1	8971670	8971880	ENO1-AS1	32776	46.1	40.5	3.4e-145
	chr1	9242108	9242318	MIR34A	30272	662	580.57	0
	chr1	9510464	9510674	LOC100506022	21489	8.18	21.95	7.54e-21
	chr1	9590798	9591008	SLC25A33	8521	12.3	32.16	1.44e-36
	chr1	10143282	10143492	UBE4B	50241	30	78.61	3.29e-116
	chr1	10969888	10970098	C1orf127	71997	21.4	28.08	1.42e-59
	chr1	11086195	11086405	TARDBP	13516	53.3	35.09	2.72e-159
	chr1	11619394	11619604	LOC101929181	49985	66.2	173.56	1.00e-314
	chr1	12267226	12267436	MIR4632	15456	31.2	40.84	5.79e-98
	chr1	12344630	12344840	VPS13D	54517	30	26.2	7.51e-80
	chr1	12678377	12678587	DHRS3	640	101.2	88.65	0
	chr1	12700622	12700832	AADACL4	3735	112.7	591.12	0
	chr1	14135418	14135628	PRDM2	59542	10.5	55.13	4.15e-37
	chr1	14847377	14847587	KAZN	403039	17.1	22.46	9.37e-43
	chr1	15059651	15059861	KAZN	190765	139.6	366.52	0
	chr1	15234021	15234231	KAZN	16395	41.9	110.26	2.34e-179
	chr1	15592784	15592994	FHAD1	19016	27.6	36.24	1.07e-83
	chr1	15629702	15629912	FHAD1	55934	43.8	38.29	4.95e-134
	chr1	16243073	16243283	ZBTB17	59345	15.4	80.65	6.76e-61
	chr1	16450120	16450330	EPHA2	32253	24.7	21.61	1.41e-60
	chr1	16478998	16479208	EPHA2	3375	84.5	222.56	0
	chr1	16514834	16515044	ARHGEF19	24061	42.6	27.95	7.26e-116
	chr1	16723188	16723398	SZRD1	29663	18.3	96.99	1.74e-76
	chr1	16819327	16819537	CROCCP3	131	114.9	150.59	0
	chr1	16886269	16886479	NBPF1	53622	85.5	20.37	5.87e-203
	chr1	17252164	17252374	CROCC	3719	14.2	37.77	2.75e-44
	chr1	17591768	17591978	PADI3	16175	15.4	40.33	4.62e-49
	chr1	17636280	17636490	PADI4	1590	71.7	62.62	5.88e-258
	chr1	17770024	17770234	RCC2	4965	260.5	136.6	0
	chr1	17818666	17818876	ARHGEF10L	47455	52.2	136.81	1.01e-233
	chr1	18284398	18284608	IGSF21	149633	15	39.31	1.85e-47
	chr1	18492161	18492371	IGSF21	57921	68	59.55	6.87e-242
	chr1	18519560	18519770	IGSF21	85320	57	37.39	2.52e-173
	chr1	18807480	18807690	KLHDC7A	56	48.7	127.62	1.23e-214
	chr1	19008278	19008488	PAX7	50778	25.9	67.89	1.02e-95
	chr1	20460153	20460363	PLA2G2F	5461	219.2	1149.57	0
	chr1	21210373	21210583	HP1BP3	97192	95.4	62.66	0
	chr1	21723088	21723298	NBPF3	43286	167.8	221.03	0
	chr1	22056951	22057161	USP48	52528	38.9	34.03	2.47e-115
	chr1	22160581	22160791	LDLRAD2	21823	66.4	175.09	3.29e-319
	chr1	22197820	22198030	LDLRAD2	59062	16.4	42.88	2.68e-52
	chr1	22282382	22282592	HSPG2	18592	39.7	52.07	2.72e-136
	chr1	22301287	22301497	CELA3B	1922	117.8	309.85	0
	chr1	22326237	22326447	CELA3A	1703	30.8	80.65	5.2e-120
	chr1	22373286	22373496	CDC42	5625	30.8	80.65	5.2e-120
	chr1	23144023	23144233	MIR4253	45487	146.8	192.45	0
	chr1	23581433	23581643	LINC01355	30369	18.3	95.97	1.67e-74
	chr1	23703961	23704171	ZNF436	7604	78.3	68.57	1.2e-290
	chr1	23919174	23919384	ID3	32889	137.5	180.2	0
	chr1	24160678	24160888	HMGCL	8729	30	19.65	1.56e-70
	chr1	24192060	24192270	FUCA1	2590	233.3	204.7	0
	chr1	24455800	24456010	IL22RA1	13766	46.7	245.02	1.16e-240
	chr1	24745512	24745722	NIPAL3	3267	109.2	71.85	0
	chr1	25298858	25299068	RUNX3	42088	278	728.95	0
	chr1	25379856	25380066	RUNX3	123086	22.6	29.61	5.82e-64
	chr1	25418880	25419090	SYF2	139924	37.6	98.52	3.94e-155
	chr1	25466603	25466813	SYF2	92201	21	110.26	1.33e-90
	chr1	25808876	25809086	TMEM57	51527	16.9	22.21	9.37e-43
	chr1	26075062	26075272	SEPN1	51396	20.4	54.11	1.62e-72
	chr1	26728482	26728692	LIN28A	8578	84.7	111.03	0
	chr1	27187723	27187933	SFN	1701	32.1	28.08	1.86e-88
	chr1	27573951	27574161	WDTC1	12944	83.9	73.34	2.05e-318
	chr1	27803806	27804016	WASF2	12663	13.2	34.71	1.28e-39
	chr1	28568441	28568651	ATPIF1	5839	30.4	159.27	1.12e-141
	chr1	28619247	28619457	SESN2	33284	34.3	22.46	4.45e-85
	chr1	28678887	28679097	MED18	23374	157.3	137.49	0
	chr1	29130641	29130851	OPRD1	7804	41.5	217.46	1.41e-207
	chr1	30182750	30182960	LOC101929406	327500	267.5	117.32	0
	chr1	30460622	30460832	LOC101929406	49628	154.6	67.55	0
	chr1	30893556	30893766	MATN1-AS1	297854	56.7	74.27	1.91e-215
	chr1	31045132	31045342	MATN1-AS1	146278	10.1	26.54	9.47e-28
	chr1	31216579	31216789	MIR4420	4500	43.8	115.37	1.27e-189
	chr1	31221028	31221238	MIR4420	8949	89.2	78.1	0
	chr1	31520549	31520759	PUM1	17806	55.9	73.51	1.42e-213
	chr1	31939650	31939860	LINC01225	31980	560.9	490.56	0
	chr1	32219246	32219456	MIR4254	4881	26.1	22.8	5.84e-66
	chr1	32529988	32530198	TMEM39B	8306	29.8	157.22	1.77e-139
	chr1	32698636	32698846	MTMR9LP	8466	64.4	338.95	0
	chr1	32959879	32960089	ZBTB8B	29221	51.2	45.09	4.88e-168
	chr1	34113063	34113273	ZSCAN20	174831	19.7	25.78	2.04e-52
	chr1	34277942	34278152	HMGB4	47925	11.1	29.1	4.3e-32
	chr1	34883777	34883987	C1orf94	251293	66.2	173.56	1.00e-314
	chr1	37182817	37183027	CSF3R	233902	63.1	331.8	0
	chr1	37566089	37566299	MIR4255	60866	61.3	322.62	0
	chr1	37706191	37706401	MIR4255	79027	13.2	69.42	1.2e-49
	chr1	38029134	38029344	DNALI1	6614	31.2	41.35	1.41e-99
	chr1	38300422	38300632	MTF1	24661	14.4	37.77	2.75e-44
	chr1	38390606	38390816	INPP5B	21914	57.8	76.06	5.97e-223
	chr1	38412679	38412889	INPP5B	0	162.6	85.45	0
	chr1	38583399	38583609	MIR3659	28496	21.6	28.59	4.98e-61
	chr1	38665212	38665422	LINC01343	15018	32.5	42.62	1.9e-104
	chr1	38752927	38753137	LINC01343	72488	63.3	41.48	7.57e-199
	chr1	38980279	38980489	LINC01343	299840	55.5	72.74	7.6e-210
	chr1	39509503	39509713	NDUFS5	17536	18.5	98.01	1.77e-78
	chr1	39525071	39525281	MACF1	24559	18.3	95.97	1.67e-74
	chr1	39796311	39796521	KIAA0754	78656	26.1	136.81	8.29e-118
	chr1	39812630	39812840	KIAA0754	62337	76.5	40.12	5.45e-238
	chr1	40067641	40067851	PABPC4	25120	38.9	25.65	5.1e-103
	chr1	40442621	40442831	MFSD2A	21837	194.7	255.23	0
	chr1	41168531	41168741	NFYC-AS1	10598	60.4	158.25	2e-281
	chr1	41177202	41177412	NFYC-AS1	19269	57.4	25.18	9.48e-151
	chr1	41235540	41235750	MIR30C1	12584	52.4	45.77	2.36e-171
	chr1	41352380	41352590	CITED4	24362	68.1	44.67	4.41e-220
	chr1	41472673	41472883	SLFNL1-AS1	7380	99.5	524.76	0
	chr1	41788974	41789184	FOXO6	38420	58.6	30.73	3.04e-165
	chr1	41818986	41819196	FOXO6	8408	9.74	25.52	2.47e-26
	chr1	41878449	41878659	FOXO6	50846	23.8	31.14	2.05e-68
	chr1	41947985	41948195	EDN2	2150	266.4	699.85	0
	chr1	42184179	42184389	HIVEP3	199990	28.4	75.04	1.5e-110
	chr1	42872815	42873025	RIMKLA	26347	36.4	23.86	2.9e-93
	chr1	42998868	42999078	CCDC30	1483	237.3	207.42	0
	chr1	43187671	43187881	CLDN19	18045	47.9	20.93	2.57e-115
	chr1	43406751	43406961	SLC2A1-AS1	17760	46.5	24.6	5.44e-122
	chr1	43618587	43618797	FAM183A	4993	376.8	494.9	0
	chr1	45265507	45265717	PLK3	320	143.7	377.75	0
	chr1	45847080	45847290	MUTYH	41293	29.6	39.05	3.71e-93
	chr1	46079006	46079216	CCDC17	10516	15	78.61	5.41e-59
	chr1	46423175	46423385	MAST2	153890	133.6	350.69	0
	chr1	46537622	46537832	PIK3R3	60877	22.8	19.91	5.34e-54
	chr1	46717187	46717397	RAD54L	3820	22.8	29.86	5.82e-64
	chr1	46822897	46823107	NSUN4	17048	30	39.82	9.38e-95
	chr1	47105312	47105522	MOB3C	22749	90.5	79.12	0
	chr1	48035483	48035693	FOXD2	133794	27.8	36.5	1.07e-83
	chr1	48198331	48198541	TRABD2B	264022	38.2	25.01	3.28e-100
	chr1	48534233	48534443	TRABD2B	71671	22	19.23	2.03e-51
	chr1	48691267	48691477	SLC5A9	2910	33.7	29.78	9.08e-96
	chr1	50604968	50605178	ELAVL4	33004	39.9	35.39	1.68e-121
	chr1	50632049	50632259	ELAVL4	60085	58	306.28	2.65e-316
	chr1	51069320	51069530	DMRTA2	180201	169	63.44	0
	chr1	51406110	51406320	FAF1	19617	16.5	21.69	2.06e-41
	chr1	52058439	52058649	EPS15	73444	29.4	77.08	2.57e-114
	chr1	52157992	52158202	OSBPL9	37285	107.9	141.65	0
	chr1	52159364	52159574	OSBPL9	35913	100.3	65.72	0
	chr1	52294779	52294989	MIR761	7086	34.1	179.68	5.94e-164
	chr1	52539582	52539792	BTF3L4	17725	7.4	19.4	3.18e-18
	chr1	52834688	52834898	CC2D1B	2811	46.3	30.5	5.42e-132
	chr1	53022708	53022918	ZCCHC11	3946	13.4	70.44	1.71e-51
	chr1	53226307	53226517	ZYG11B	34176	39.3	103.11	3.75e-165
	chr1	53666976	53667186	CPT2	4875	22.8	19.91	5.34e-54
	chr1	54469010	54469220	LDLRAD1	14640	40.5	53.09	9.76e-140
	chr1	55525811	55526021	PCSK9	19916	44.4	38.8	3.34e-137
	chr1	55590255	55590465	PCSK9	84360	29.8	26.03	7.51e-80
	chr1	56057471	56057681	MIR4422	366157	12.7	33.69	4.36e-38
	chr1	56397435	56397645	PPAP2B	647613	22.4	29.61	5.82e-64
	chr1	56576784	56576994	PPAP2B	468264	29.2	25.52	5.01e-77
	chr1	56999408	56999618	PPAP2B	45640	21.6	113.32	1.18e-92
	chr1	57715291	57715501	C8B	283478	18.5	48.49	3.03e-62
	chr1	58096467	58096677	DAB1-AS1	229539	95.6	50.13	1.18e-320
	chr1	58672553	58672763	DAB1	43449	36.2	95.46	3.6e-149
	chr1	59481560	59481770	LINC01358	4379	38.2	100.05	3.98e-159
	chr1	60097364	60097574	MIR4711	101395	24.1	31.9	6.5e-70
	chr1	60195949	60196159	MIR4711	2810	90	78.95	0
	chr1	61804232	61804442	NFIA-AS1	85042	53.5	35.09	2.72e-159
	chr1	62084476	62084686	MGC34796	35229	24.3	64.32	2.94e-90
	chr1	62339341	62339551	INADL	131192	67	87.8	5.83e-267
	chr1	62369003	62369213	INADL	160854	43	37.6	7.09e-131
	chr1	63433961	63434171	ATG4C	184184	35.4	93.93	3.21e-145
	chr1	63498939	63499149	ATG4C	249162	16.7	43.9	6.23e-54
	chr1	63669925	63670135	LINC00466	112767	29.8	26.03	7.51e-80
	chr1	64096376	64096586	PGM1	37429	26.3	34.46	1.66e-77
	chr1	64444250	64444460	ROR1-AS1	135015	40.9	21.44	3.55e-100
	chr1	64876907	64877117	CACHD1	59360	136.5	51.34	0
	chr1	65038264	65038474	MIR4794	7057	28.8	75.55	1.5e-110
	chr1	65611408	65611618	AK4	1615	16.4	21.44	4.44e-40
	chr1	66866458	66866668	PDE4B	68665	55.3	48.49	9.62e-185
	chr1	66928033	66928243	SGIP1	71583	52.6	68.91	4.77e-195
	chr1	67400133	67400343	MIER1	9555	53.9	35.48	7.72e-161
	chr1	67409201	67409411	MIER1	18623	33.9	44.67	5.19e-111
	chr1	67612343	67612553	C1orf141	11689	41.7	27.44	5.55e-113
	chr1	67681013	67681223	IL23R	48844	36.4	48.24	1.1e-122
	chr1	67832678	67832888	IL12RB2	59631	66.2	21.69	1.63e-161
	chr1	67875530	67875740	SERBP1	20384	42.6	28.08	2.59e-117
	chr1	68041614	68041824	GADD45A	109037	22.6	29.61	5.82e-64
	chr1	68152371	68152581	GADD45A	1511	492	323.38	0
	chr1	68190951	68191161	GADD45A	40091	107.9	141.65	0
	chr1	69521017	69521227	DEPDC1	558113	461.1	605.16	0
	chr1	70442686	70442896	PIN1P1	57681	15.2	19.91	3.84e-36
	chr1	70797804	70798014	ANKRD13C	22404	26.3	22.97	5.84e-66
	chr1	71349356	71349566	ZRANB2-AS1	162624	7.4	38.8	9.51e-24
	chr1	72466584	72466794	NEGR1-IT1	163889	417.4	547.48	0
	chr1	74625805	74626015	LRRIQ3	37857	78.9	103.37	0
	chr1	74916172	74916382	TNNI3K	215101	30.8	80.65	5.2e-120
	chr1	75157986	75158196	ERICH3	18564	24.5	32.16	2.03e-71
	chr1	75557844	75558054	LHX8	36066	52.8	34.58	3.31e-156
	chr1	75837647	75837857	SLC44A5	238943	55.7	293.01	5.79e-299
	chr1	76157911	76158121	ACADM	31912	7.98	41.86	2.38e-25
	chr1	76656788	76656998	ST6GALNAC3	116399	19.9	52.07	4.65e-69
	chr1	77385037	77385247	ST6GALNAC5	51851	61.9	81.16	6.51e-242
	chr1	77875133	77875343	AK5	127471	58.6	154.16	1.2e-272
	chr1	78350051	78350261	NEXN	3940	77.9	68.23	8.2e-289
	chr1	78578942	78579152	GIPC2	67353	127.1	333.85	0
	chr1	79237372	79237582	IFI44	121895	13.2	34.71	1.28e-39
	chr1	79554771	79554981	ELTD1	82276	35.8	23.48	1.62e-90
	chr1	82340203	82340413	LPHN2	74121	184	241.45	0
	chr1	82346380	82346590	LPHN2	80298	49.3	32.29	1.76e-142
	chr1	82691925	82692135	LPHN2	425843	150.9	197.81	0
	chr1	83477081	83477291	LINC01361	25190	17.3	45.43	3.14e-57
	chr1	83532109	83532319	LINC01361	80218	15.8	41.35	1.13e-50
	chr1	85051557	85051767	CTBS	11394	99.1	259.83	0
	chr1	85697634	85697844	C1orf52	27512	17.9	46.96	6.83e-59
	chr1	86979851	86980061	CLCA4	32699	16.7	21.95	2.06e-41
	chr1	87315816	87316026	SEP15	64082	31.9	167.43	1.59e-150
	chr1	87640489	87640699	LOC101927844	37654	237	311.13	0
	chr1	88501381	88501591	PKN2	648332	56.3	73.76	1.42e-213
	chr1	88522855	88523065	PKN2	626858	13	68.4	1.2e-49
	chr1	89010794	89011004	PKN2	138919	29.6	19.65	1.56e-70
	chr1	89113077	89113287	PKN2	36636	49.6	26.24	3.04e-133
	chr1	89267646	89267856	GTF2B	89446	434	569.68	0
	chr1	89771972	89772182	LOC729930	15927	85.3	112.3	0
	chr1	89789583	89789793	LOC729930	33538	58.2	152.63	2.82e-268
	chr1	91521499	91521709	ZNF644	33687	104.2	136.55	0
	chr1	91665350	91665560	ZNF644	177538	31.7	41.6	3.4e-101
	chr1	91725183	91725393	HFM1	145034	22.8	59.72	2.7e-81
	chr1	91995543	91995753	CDC7	29139	166.5	219.25	0
	chr1	92070556	92070766	CDC7	104152	53.2	46.45	1.11e-174
	chr1	92073342	92073552	CDC7	106938	20.2	53.09	8.77e-71
	chr1	93688953	93689163	CCDC18	42680	254.9	133.64	0
	chr1	94317236	94317446	MIR760	4848	24.1	21.1	3.02e-59
	chr1	94887502	94887712	ABCD3	3569	45	58.96	5.76e-159
	chr1	95302544	95302754	SLC44A3	16444	312.7	410.67	0
	chr1	95633103	95633313	TMEM56-RWDD3	49624	10.7	28.59	1.25e-30
	chr1	95818068	95818278	RWDD3	118357	31	20.42	1.94e-74
	chr1	96110681	96110891	LOC100996635	135009	11.9	31.14	4.62e-35
	chr1	96250700	96250910	LOC100996635	275028	22.6	59.21	2.7e-81
	chr1	96573819	96574029	LOC101928241	265653	23.2	121.49	6.32e-101
	chr1	96799932	96800142	LOC101928241	39540	46.1	60.75	4.52e-166
	chr1	97527257	97527467	DPYD-AS1	34013	88.2	115.88	0
	chr1	97873791	97874001	DPYD-AS1	312312	5.26	27.57	1.19e-14
	chr1	97954151	97954361	DPYD-AS2	308117	12.3	32.16	1.44e-36
	chr1	98636364	98636574	LOC729987	39694	40.1	21.03	1.61e-97
	chr1	98930568	98930778	SNX7	196459	87.2	229.71	0
	chr1	98981948	98982158	SNX7	145079	185.6	243.24	0
	chr1	99143003	99143213	SNX7	15767	159.5	139.53	0
	chr1	100046033	100046243	PALMD	65189	99.7	130.94	0
	chr1	100895970	100896180	CDC14A	77947	89.6	234.82	0
	chr1	101992452	101992662	S1PR1	290147	91.1	477.8	0
	chr1	103766017	103766227	COL11A1	191965	39.5	25.91	1.98e-104
	chr1	107412839	107413049	PRMT6	186219	64.8	339.97	0
	chr1	107481628	107481838	PRMT6	117430	23.2	30.37	1.94e-65
	chr1	107870164	107870374	NTNG1	187535	38.2	50.03	1.88e-129
	chr1	108209941	108210151	VAV3	20976	22	28.84	4.98e-61
	chr1	109388599	109388809	AKNAD1	10918	46	40.16	1.37e-143
	chr1	109462845	109463055	CLCC1	43067	10.1	53.09	2.24e-35
	chr1	109740692	109740902	KIAA1324	11521	83.9	73.51	2.05e-318
	chr1	109839527	109839737	MYBPHL	9927	24.9	65.34	4.53e-92
	chr1	110363263	110363473	EPS8L3	56619	81.2	213.38	0
	chr1	110454094	110454304	CSF1	861	48.5	127.11	1.23e-214
	chr1	110802473	110802683	KCNC4	49137	9.35	24.5	6.18e-25
	chr1	111232998	111233208	KCNA3	15343	25.3	22.12	2.96e-63
	chr1	111447194	111447404	CD53	31472	14.2	74.53	3.21e-55
	chr1	111757164	111757374	CHI3L2	12908	578.1	1516.6	0
	chr1	111907471	111907681	PIFO	18276	486	255.13	0
	chr1	112480854	112481064	KCND3	50714	34.5	90.35	2.5e-139
	chr1	112862331	112862541	CTTNBP2NL	76260	75.7	66.19	7.53e-278
	chr1	112944796	112945006	CTTNBP2NL	5996	36.8	195	3.98e-182
	chr1	113230076	113230286	MOV10	13142	71.3	187.34	0
	chr1	113246447	113246657	RHOC	3369	49.1	129.15	7.45e-219
	chr1	113305779	113305989	FAM19A3	42590	235	1233.29	0
	chr1	113417142	113417352	LINC01356	23877	41.1	107.71	3.03e-173
	chr1	113790545	113790755	LOC643441	41670	14.8	19.65	3.84e-36
	chr1	114459791	114460001	DCLRE1B	11876	25.5	66.87	6.86e-94
	chr1	114879044	114879254	TRIM33	174528	69.5	45.69	1.06e-226
	chr1	115071962	115072172	TRIM33	18181	31.3	41.09	1.41e-99
	chr1	115153312	115153522	BCAS2	29047	83.9	73.34	2.05e-318
	chr1	115345797	115346007	SIKE1	22489	86.3	75.55	0
	chr1	115771617	115771827	NGF	109031	18.5	24.5	1.3e-49
	chr1	115843240	115843450	NGF	37408	122.9	80.91	0
	chr1	116381940	116382150	NHLH2	1184	147.6	387.45	0
	chr1	116420176	116420386	NHLH2	36843	207.8	272.59	0
	chr1	117281330	117281540	CD2	15547	17.1	90.86	1.44e-70
	chr1	117342038	117342248	CD2	44952	20.2	26.8	2.96e-55
	chr1	117421828	117422038	PTGFRN	30652	442	165.61	0
	chr1	119901392	119901602	HAO2	9801	189.3	248.34	0
	chr1	120147807	120148017	LINC00622	5893	60	26.2	3.25e-159
	chr1	120460029	120460239	ADAM30	20882	49.6	65.08	2.89e-182
	chr1	121285916	121286126	EMBP1	25006	84.7	74.02	3.75e-322
	chr1	142834265	142834475	ANKRD20A12P	120660	15.6	20.42	1.92e-37
	chr1	143202227	143202437	LOC102723769	0	36.6	31.99	1.06e-104
	chr1	144010737	144010947	FAM72D	97594	1065.6	699.72	0
	chr1	145224481	145224691	NOTCH2NL	15368	47.7	31.27	1.82e-136
	chr1	145543214	145543424	ANKRD35	5786	32.7	28.59	6.58e-90
	chr1	146642214	146642424	PRKAB2	1745	31.9	168.45	9.46e-153
	chr1	147314614	147314824	GJA8	60123	8.96	23.48	1.48e-23
	chr1	148887352	148887562	DRD5P2	14284	16.5	43.9	6.23e-54
	chr1	148942927	148943137	LOC645166	14614	32.9	43.13	4.42e-106
	chr1	149869449	149869659	BOLA1	1497	42.4	55.9	2.03e-148
	chr1	150633728	150633938	ENSA	31630	21.6	28.33	1.42e-59
	chr1	150720368	150720578	CTSS	17856	17.1	22.46	9.37e-43
	chr1	151496688	151496898	CGN	12826	14.4	37.77	2.75e-44
	chr1	151830635	151830845	THEM5	4462	43.2	37.77	1.88e-132
	chr1	152140337	152140547	RPTN	8633	106.5	139.61	0
	chr1	152450153	152450363	LCE5A	32958	60	78.61	2.13e-232
	chr1	152690794	152691004	C1orf68	995	20.2	106.18	1.58e-86
	chr1	152758547	152758757	LCE1E	0	43.2	56.66	6.41e-152
	chr1	152859639	152859849	SMCP	8841	36	31.48	3.34e-103
	chr1	152877851	152878061	IVL	2979	41.9	110.26	2.34e-179
	chr1	153498684	153498894	S100A6	9824	109	142.93	0
	chr1	153540031	153540241	S100A2	1725	132	695.26	0
	chr1	154363876	154364086	IL6R	13584	54.9	72.23	5.51e-208
	chr1	154786032	154786242	KCNN3	56513	48.3	126.6	1.56e-212
	chr1	155411610	155411820	POU5F1P4	8639	44.8	58.7	5.76e-159
	chr1	155516314	155516524	ASH1L-AS1	15249	19.1	50.03	1.23e-65
	chr1	156093593	156093803	LMNA	9132	109.4	95.8	0
	chr1	156700958	156701168	RRNAD1	2695	18.5	48.49	3.03e-62
	chr1	157044018	157044228	ETV3L	25373	10.3	27.05	3.5e-29
	chr1	157127501	157127711	ETV3	19324	39.5	34.71	2.08e-118
	chr1	157427204	157427414	FCRL5	94897	7.4	19.4	3.18e-18
	chr1	158116555	158116765	LOC646268	6125	73.2	63.98	3.69e-265
	chr1	158885999	158886209	PYHIN1	15129	21	27.57	3.98e-58
	chr1	160373932	160374142	VANGL2	3568	48.3	127.62	1.23e-214
	chr1	160508879	160509089	SLAMF6	15827	56.3	73.76	1.42e-213
	chr1	161074420	161074630	KLHDC9	6239	13.4	70.44	1.71e-51
	chr1	161401924	161402134	C1orf192	64251	7.79	20.42	1.59e-19
	chr1	162064285	162064495	MIR4654	62403	44.8	117.92	9.35e-194
	chr1	162515162	162515372	UAP1	15925	27.6	72.49	6.09e-105
	chr1	162946498	162946708	RGS4	94988	11.9	31.14	4.62e-35
	chr1	163252264	163252474	RGS5	39108	35.4	186.83	5.29e-173
	chr1	163793386	163793596	LOC100422212	400405	9.15	23.99	1.48e-23
	chr1	165625114	165625324	MGST3	25004	11.5	60.24	2.13e-42
	chr1	165873031	165873241	MIR3658	3918	27.8	36.5	1.07e-83
	chr1	166172569	166172779	FAM78B	36611	23.2	20.25	2.67e-55
	chr1	166177740	166177950	FAM78B	41782	10.3	27.05	3.5e-29
	chr1	166315391	166315601	FAM78B	179433	14.2	74.53	3.21e-55
	chr1	166992417	166992627	MAEL	47598	67.4	44.28	1.96e-218
	chr1	167542346	167542556	CREG1	19290	102	29.78	2.26e-283
	chr1	167955326	167955536	MPC2	49019	87.4	230.22	0
	chr1	168445987	168446197	LOC100505918	54093	11.5	30.63	1.43e-33
	chr1	168961063	168961273	LINC00970	94971	128.7	112.64	0
	chr1	169553814	169554024	F5	1746	55.9	293.01	5.79e-299
	chr1	170376857	170377067	LINC01142	123508	16.5	43.39	6.23e-54
	chr1	170594610	170594820	PRRX1	38494	53.7	141.4	1.95e-244
	chr1	170618896	170619106	PRRX1	14208	21.4	56.15	5.27e-76
	chr1	171291362	171291572	FMO4	7876	22.4	119.45	7.59e-99
	chr1	171723619	171723829	VAMP4	12240	50.2	132.21	3.31e-225
	chr1	171853769	171853979	DNM3	43151	115.7	303.73	0
	chr1	171871774	171871984	DNM3	61156	103	45.09	0
	chr1	172040792	172041002	MIR3120	66947	23.8	62.79	1.19e-86
	chr1	172345766	172345976	C1orf105	43853	44	19.23	2.75e-102
	chr1	172392573	172392783	C1orf105	2745	26.3	34.71	4.81e-79
	chr1	172445443	172445653	PIGC	32213	87.4	76.57	0
	chr1	172657840	172658050	FASLG	29655	7.79	20.93	1.59e-19
	chr1	173175046	173175256	TNFSF4	1216	34.7	22.72	1.98e-86
	chr1	173265001	173265211	TNFSF4	88530	31.9	167.43	1.59e-150
	chr1	173325742	173325952	LOC100506023	120343	15	19.65	3.84e-36
	chr1	173570987	173571197	SLC9C2	1037	18.5	24.25	3.2e-48
	chr1	173606475	173606685	LOC730159	1814	81.6	213.89	0
	chr1	173611671	173611881	LOC730159	7010	82.9	217.46	0
	chr1	173626345	173626555	ANKRD45	12447	20.2	53.09	8.77e-71
	chr1	173830111	173830321	GAS5-AS1	2066	18.7	49	6.17e-64
	chr1	174567236	174567446	GPR52	150024	13.6	35.73	3.66e-41
	chr1	175191445	175191655	KIAA0040	29216	25.3	66.36	6.86e-94
	chr1	175500062	175500272	TNR	212481	22.2	116.39	8.95e-97
	chr1	175705917	175706127	TNR	6626	9.54	25.01	2.47e-26
	chr1	176781953	176782163	MIR488	216419	8.96	46.96	2.8e-30
	chr1	177782464	177782674	LOC101928778	112805	15.2	39.82	1.85e-47
	chr1	177884008	177884218	SEC16B	54833	42.1	22.05	3.42e-104
	chr1	177982166	177982376	LOC730102	24767	16	42.37	2.68e-52
	chr1	178239985	178240195	RASAL2	70412	26.1	22.8	5.84e-66
	chr1	178247329	178247539	RASAL2	63068	65.4	42.88	1.35e-208
	chr1	179008239	179008449	FAM20B	13165	42.3	27.69	2.02e-114
	chr1	179044446	179044656	TOR3A	6457	28.4	76.57	1.98e-112
	chr1	179369159	179369369	AXDND1	34304	9.74	51.05	1.17e-33
	chr1	179606644	179606854	TDRD5	31282	29	38.29	5.57e-90
	chr1	180226241	180226451	LHX4-AS1	17366	34.3	90.86	2.5e-139
	chr1	180485295	180485505	ACBD6	13273	243	58.24	0
	chr1	180491199	180491409	ACBD6	19177	36	94.44	3.42e-147
	chr1	180554704	180554914	XPR1	46233	78.1	51.43	1.82e-265
	chr1	181068795	181069005	IER5	11157	211.8	278.72	0
	chr1	181104181	181104391	IER5	46543	1383	1210.32	0
	chr1	181491031	181491241	CACNA1E	38345	219.2	287.39	0
	chr1	181737377	181737587	CACNA1E	284691	27.6	36.24	1.07e-83
	chr1	182612940	182613150	LOC284648	28665	163.4	428.79	0
	chr1	182730594	182730804	NPL	27781	551.8	1448.2	0
	chr1	183330340	183330550	NMNAT2	56331	11.3	30.12	1.43e-33
	chr1	183433051	183433261	SMG7-AS1	7857	67.2	88.31	6.62e-269
	chr1	183486535	183486745	SMG7	45029	28.4	37.26	7.94e-87
	chr1	184605052	184605262	EDEM3	118780	37.4	196.02	2.03e-184
	chr1	184922643	184922853	FAM129A	20866	26.9	23.65	1.09e-68
	chr1	185606259	185606469	LINC01350	8639	24.3	63.81	1.88e-88
	chr1	185930859	185931069	HMCN1	227176	38.2	50.03	1.88e-129
	chr1	186708775	186708985	PTGS2	59216	66.6	174.58	5.76e-317
	chr1	187377396	187377606	PLA2G4A	579364	46.9	61.51	1.2e-169
	chr1	187599848	187600058	PLA2G4A	801816	189.8	249.11	0
	chr1	187607925	187608135	PLA2G4A	809893	345.2	301.86	0
	chr1	188086633	188086843	PLA2G4A	1288601	36.4	95.97	3.6e-149
	chr1	191679269	191679479	RGS18	448114	11.7	30.63	1.43e-33
	chr1	191870852	191871062	RGS18	256531	24.3	127.62	3.32e-107
	chr1	192870743	192870953	RGS2	92574	43.6	114.34	1.46e-187
	chr1	196466270	196466480	MIR4735	85132	31.9	41.86	3.4e-101
	chr1	198173148	198173358	NEK7	47040	20.2	106.18	1.58e-86
	chr1	198392841	198393051	ATP6V1G3	117025	14.2	37.26	2.75e-44
	chr1	199918193	199918403	NR5A2	78328	432.4	188.96	0
	chr1	200264361	200264571	LINC00862	78350	14.2	37.26	2.75e-44
	chr1	200289106	200289316	LINC00862	53605	37	193.98	7.72e-180
	chr1	200811867	200812077	GPR25	30007	73.4	64.49	8.96e-269
	chr1	201438192	201438402	PHLDA3	0	388.2	510.47	0
	chr1	202025784	202025994	ELF3	46094	208.5	182.41	0
	chr1	202206347	202206557	LGR6	23064	105.7	92.74	0
	chr1	202323453	202323663	UBE2T	12359	96.2	126.34	0
	chr1	202944949	202945159	CYB5R1	8545	62.1	162.84	3.01e-290
	chr1	202971699	202971909	LOC100506747	4485	422.1	553.86	0
	chr1	203220696	203220906	CHIT1	21836	47.5	124.55	2.46e-208
	chr1	203222030	203222240	CHIT1	23170	23.9	20.93	6.34e-58
	chr1	203272667	203272877	LINC01136	1577	18.1	94.95	1.67e-74
	chr1	203275708	203275918	BTG2	1044	92.1	120.73	0
	chr1	204153240	204153450	KISS1	12170	12.1	31.65	4.62e-35
	chr1	204478597	204478807	MDM4	6701	156.2	409.91	0
	chr1	204494077	204494287	MDM4	8570	211.3	277.44	0
	chr1	204568501	204568711	MDM4	82994	20.4	54.11	1.62e-72
	chr1	204983297	204983507	CNTN2	28834	7.59	39.82	9.51e-24
	chr1	206298261	206298471	C1orf186	9614	38.4	25.52	5.1e-103
	chr1	206807139	206807349	DYRK3	1533	84.7	37.43	9.2e-260
	chr1	206820529	206820739	DYRK3	11648	105.3	138.08	0
	chr1	206999984	207000194	IL19	2029	163.9	143.27	0
	chr1	207047211	207047421	IL20	8057	26.1	34.2	1.66e-77
	chr1	207135126	207135336	FCAMR	8635	88.6	232.77	0
	chr1	207414102	207414312	CD55	80506	58.2	50.88	1.29e-196
	chr1	207880754	207880964	CD46	44420	386.3	253.19	0
	chr1	208259466	208259676	PLXNA2	157990	48.9	32.03	5.68e-141
	chr1	208387149	208387359	PLXNA2	30307	169.2	110.9	0
	chr1	209291192	209291402	MIR205HG	310767	30.6	26.71	1.07e-82
	chr1	209585066	209585276	MIR205HG	16893	188.1	247.07	0
	chr1	209604441	209604651	MIR205	828	31.2	40.84	5.79e-98
	chr1	210494938	210495148	HHAT	6449	52.8	46.11	5.12e-173
	chr1	211668942	211669152	RD3	2683	17.7	23.23	1.81e-45
	chr1	211750619	211750829	SLC30A1	1271	130.5	31.23	0
	chr1	212352964	212353174	MIR3122	102009	34.5	45.43	1.15e-112
	chr1	212676196	212676406	NENF	69967	208.9	1096.49	0
	chr1	212769810	212770020	ATF3	11951	756	991.84	0
	chr1	214612873	214613083	PTPN14	111942	96.6	42.2	3.66e-306
	chr1	215175079	215175289	KCNK2	81272	65.6	344.06	0
	chr1	217065183	217065393	ESRRG	168369	11.9	31.14	4.62e-35
	chr1	218774448	218774658	LOC728463	255428	192.8	101.48	0
	chr1	218807600	218807810	LOC728463	288580	14.8	38.8	7.22e-46
	chr1	219759236	219759446	RNU5F-1	287174	196.7	172.03	0
	chr1	220509790	220510000	RAB3GAP2	63947	87.2	229.2	0
	chr1	221307697	221307907	C1orf140	201732	17.5	91.88	1.44e-70
	chr1	221346000	221346210	C1orf140	163429	38	199.08	1.03e-186
	chr1	222340567	222340777	HHIPL2	380668	48.7	32.03	5.68e-141
	chr1	222545218	222545428	HHIPL2	176017	61.1	160.8	7.85e-286
	chr1	222979286	222979496	DISP1	8936	304.7	266.8	0
	chr1	223221501	223221711	TLR5	94914	66.6	349.16	0
	chr1	223895861	223896071	CAPN2	6566	96.2	126.09	0
	chr1	224914698	224914908	CNIH3	110519	45.2	118.43	7.92e-196
	chr1	225047347	225047557	DNAH14	69800	32.1	28.08	1.86e-88
	chr1	225375359	225375569	LBR	240989	23.2	121.49	6.32e-101
	chr1	225535002	225535212	LBR	81346	13.2	70.44	1.71e-51
	chr1	225813266	225813476	ENAH	27370	46.9	246.05	4.7e-243
	chr1	226008596	226008806	EPHX1	10820	40.3	52.83	5.17e-138
	chr1	227521370	227521580	CDC42BPA	15544	9.74	25.52	2.47e-26
	chr1	227911283	227911493	LOC100130093	4748	194.3	169.82	0
	chr1	227928320	227928530	JMJD4	5208	11.9	31.14	4.62e-35
	chr1	229367166	229367376	RAB4A	39434	59.6	19.53	3.61e-139
	chr1	230763608	230763818	COG2	14385	137.9	60.32	0
	chr1	231307457	231307667	TRIM67	8783	41.9	111.79	2.11e-181
	chr1	232266667	232266877	DISC2	312404	138	120.64	0
	chr1	232855090	232855300	LOC101927683	23162	41.1	107.71	3.03e-173
	chr1	232884699	232884909	LOC101927683	6238	96	252.17	0
	chr1	233009778	233009988	MAP10	69140	11.1	29.1	4.3e-32
	chr1	233088721	233088931	NTPCR	2351	170	55.96	0
	chr1	233315429	233315639	PCNXL2	115821	406.2	533.44	0
	chr1	233844213	233844423	MIR4427	84315	90.5	237.37	0
	chr1	234284567	234284777	MIR4671	157437	18.9	25.01	5.21e-51
	chr1	234528959	234529169	COA6	19745	78.9	103.37	0
	chr1	234548643	234548853	COA6	39429	17.5	92.91	1.57e-72
	chr1	234754230	234754440	IRF2BP2	8959	1218.3	533.1	0
	chr1	234835948	234836158	LINC01132	23632	89.8	59.09	1.81e-319
	chr1	234872172	234872382	LINC01132	12383	21.8	57.17	9.24e-78
	chr1	235511602	235511812	TBCE	18864	111.8	146.5	0
	chr1	235833313	235833523	GNG4	20020	145.4	191.43	0
	chr1	235838437	235838647	GNG4	25144	658.7	575.98	0
	chr1	236096462	236096672	LYST	66235	28.4	37.26	7.94e-87
	chr1	238650076	238650286	LINC01139	759	18.3	47.98	1.45e-60
	chr1	239869998	239870208	CHRM3-AS2	12212	25.9	34.2	1.66e-77
	chr1	240807173	240807383	GREM2	31711	9.74	25.52	2.47e-26
	chr1	241100261	241100471	MIR3123	195102	141.6	123.7	0
	chr1	241852132	241852342	WDR64	36552	28	73.51	8.34e-107
	chr1	242087267	242087477	BECN1P1	33593	11.5	60.24	2.13e-42
	chr1	242226181	242226391	MAP1LC3C	63796	8.96	46.96	2.8e-30
	chr1	242363499	242363709	MAP1LC3C	201114	61.9	81.16	6.51e-242
	chr1	242464285	242464495	PLD5	223504	15.8	82.7	8.25e-63
	chr1	242999543	242999753	LINC01347	265294	30.2	26.54	2.85e-81
	chr1	243617710	243617920	MIR4677	108232	34.9	45.69	2.53e-114
	chr1	244402793	244403003	C1orf100	112935	588.8	514.89	0
	chr1	244898820	244899030	DESI2	82468	445.3	292.5	0
	chr1	246164525	246164735	SMYD3	415980	143.1	188.11	0
	chr1	246324960	246325170	SMYD3	255545	22	58.19	1.59e-79
	chr1	247112645	247112855	AHCTF1	17919	17.7	46.45	6.83e-59
	chr1	247270163	247270373	ZNF669	2489	10.3	54.11	4.15e-37
	chr1	247276572	247276782	C1orf229	853	10.5	27.57	3.5e-29
	chr10	120331	120541	TUBB8	25153	24.9	22.12	2.96e-63
	chr10	419533	419743	ZMYND11	239128	36	94.44	3.42e-147
	chr10	1767231	1767441	ADARB2	12230	57.2	300.16	0
	chr10	2008568	2008778	LINC00700	47765	43.6	57.17	1.12e-153
	chr10	2159983	2160193	MIR6072	41700	146	191.94	0
	chr10	2326363	2326573	LINC00701	30696	26.1	22.8	5.84e-66
	chr10	2586530	2586740	LINC00701	229262	19.7	103.11	1.74e-82
	chr10	2808161	2808371	PFKP	301342	19.7	25.78	2.04e-52
	chr10	4953361	4953571	AKR1C6P	4895	133.6	701.38	0
	chr10	4958296	4958506	AKR1C6P	0	28.2	24.84	3.18e-74
	chr10	4960538	4960748	AKR1C6P	2073	66	346.1	0
	chr10	5580943	5581153	CALML3-AS1	12734	53.3	23.31	3.92e-134
	chr10	5835883	5836093	GDI2	19420	31.3	41.09	1.41e-99
	chr10	5847395	5847605	GDI2	7908	43.8	38.29	4.95e-134
	chr10	6035290	6035500	IL15RA	15140	14	73.51	2.37e-53
	chr10	6338965	6339175	LOC399715	29333	24.3	31.9	6.5e-70
	chr10	6439110	6439320	LOC399715	70603	22.4	117.41	8.95e-97
	chr10	7033527	7033737	LINC00707	211967	79.1	207.25	0
	chr10	7515545	7515755	SFMBT2	64242	55.3	144.97	6.67e-251
	chr10	8102136	8102346	GATA3	5469	26.7	69.93	2.18e-99
	chr10	8806162	8806372	LINC00708	495894	17.9	23.74	7.68e-47
	chr10	9015963	9016173	LINC00709	301404	36.6	31.99	1.06e-104
	chr10	11113747	11113957	CELF2-AS2	33495	119.4	62.69	0
	chr10	12673262	12673472	MIR4480	52510	18.1	23.74	7.68e-47
	chr10	12976808	12977018	CCDC3	66687	25.5	33.44	1.89e-74
	chr10	13118538	13118748	OPTN	23335	47.1	124.04	2.46e-208
	chr10	13170576	13170786	OPTN	28494	30	157.22	1.77e-139
	chr10	13714940	13715150	PRPF18	86001	15.4	20.16	1.92e-37
	chr10	13800432	13800642	PRPF18	171493	121.3	106.01	0
	chr10	13913046	13913256	PRPF18	284107	77.7	407.35	0
	chr10	14691016	14691226	FAM107B	44599	86.8	228.18	0
	chr10	14785085	14785295	CDNF	94689	16.5	21.69	2.06e-41
	chr10	15047429	15047639	OLAH	38257	20.6	54.11	1.62e-72
	chr10	15072425	15072635	OLAH	13261	23.9	20.93	6.34e-58
	chr10	15165970	15166180	C10orf111	26652	132.4	173.81	0
	chr10	15214563	15214773	NMT2	3868	15.2	39.82	1.85e-47
	chr10	15942695	15942905	FAM188A	40176	37	96.99	3.75e-151
	chr10	16076720	16076930	FAM188A	174201	9.15	23.99	1.48e-23
	chr10	16238944	16239154	PTER	239789	105.9	278.21	0
	chr10	17289392	17289602	VIM-AS1	17408	212.2	92.74	0
	chr10	18796881	18797091	NSUN6	143460	15.6	20.42	1.92e-37
	chr10	21716775	21716985	MIR1915	68586	319.1	279.57	0
	chr10	22038462	22038672	MLLT10	215361	13.8	36.24	1.02e-42
	chr10	24545024	24545234	MIR603	19381	78.7	103.63	0
	chr10	24577838	24578048	MIR603	13224	107.1	93.76	0
	chr10	24753459	24753669	KIAA1217	1766	53.9	47.13	5.04e-178
	chr10	24813015	24813225	KIAA1217	57581	94	49.41	1.45e-315
	chr10	25045312	25045522	ARHGAP21	32715	245.7	322.11	0
	chr10	25357246	25357456	ENKUR	6038	148.6	55.64	0
	chr10	26712702	26712912	APBB1IP	14355	149.3	391.53	0
	chr10	27532083	27532293	ACBD5	1015	28.2	24.67	3.18e-74
	chr10	28154216	28154426	MKX	119438	70.3	185.3	0
	chr10	28616513	28616723	MIR8086	38234	156.9	103.37	0
	chr10	28901064	28901274	BAMBI	65151	53.5	70.19	1.42e-200
	chr10	29258828	29259038	C10orf126	123491	56.1	147.01	2.14e-257
	chr10	29381249	29381459	LYZL1	196532	42.6	37.6	7.09e-131
	chr10	29733175	29733385	LOC102724316	34712	34.7	181.73	3.3e-166
	chr10	29865523	29865733	MIR938	25543	74.2	64.83	1.39e-270
	chr10	29924205	29924415	MIR938	32930	102.8	90.35	0
	chr10	30215665	30215875	KIAA1462	132614	43	37.77	1.88e-132
	chr10	30519192	30519402	MTPAP	118866	212.6	557.94	0
	chr10	30865176	30865386	LYZL2	53262	18.3	23.99	7.68e-47
	chr10	31583563	31583773	ZEB1-AS1	24252	22.8	19.91	5.34e-54
	chr10	32359619	32359829	KIF5B	14248	52.8	27.67	2.9e-143
	chr10	33299252	33299462	ITGB1	51959	37.6	19.81	1.2e-89
	chr10	33392986	33393196	ITGB1	145693	50.2	65.85	4.42e-184
	chr10	33993472	33993682	LINC00838	67927	200.2	525.78	0
	chr10	34186238	34186448	LINC00838	124630	23.4	61.26	7.37e-85
	chr10	34450998	34451208	LINC00838	389390	32.5	42.62	1.9e-104
	chr10	36110231	36110441	PCAT5	43001	86.8	56.92	1.34e-303
	chr10	36161444	36161654	PCAT5	94214	19.3	101.07	1.77e-80
	chr10	36176700	36176910	PCAT5	109470	29.2	38.29	5.57e-90
	chr10	36344791	36345001	PCAT5	277561	15.2	79.63	5.41e-59
	chr10	36412354	36412564	PCAT5	345124	39.5	103.63	3.75e-165
	chr10	36702761	36702971	PCAT5	635531	17.9	94.95	1.67e-74
	chr10	37573174	37573384	LINC00993	24731	15.2	79.63	5.41e-59
	chr10	38297012	38297222	ZNF33A	2357	9.74	51.05	1.17e-33
	chr10	42918977	42919187	CCNYL2	48502	9.93	52.07	2.24e-35
	chr10	43136366	43136576	ZNF33B	2374	21	27.57	3.98e-58
	chr10	43521606	43521816	MIR5100	28595	8.57	44.92	1.29e-28
	chr10	44408250	44408460	LINC00841	3498	26.3	137.83	8.29e-118
	chr10	45933895	45934105	ALOX5	64271	875.4	766.38	0
	chr10	48342820	48343030	ZNF488	12060	156.5	136.98	0
	chr10	49459683	49459893	FRMPD2	23049	86.8	76.06	0
	chr10	49622805	49623015	MAPK8	13150	61.7	54.28	8.11e-214
	chr10	49625491	49625701	MAPK8	15836	191.2	125.45	0
	chr10	49684493	49684703	MAPK8	74838	126.9	668.71	0
	chr10	49797558	49797768	ARHGAP22	15409	64.4	84.74	2.4e-255
	chr10	49935299	49935509	WDFY4	41781	8.57	45.94	1.29e-28
	chr10	50156761	50156971	LRRC18	34481	20.4	107.2	1.58e-86
	chr10	50784140	50784350	SLC18A3	33998	23.6	30.88	6.35e-67
	chr10	51518210	51518420	MSMB	31134	10.9	28.59	1.25e-30
	chr10	52081930	52082140	ASAH2	73560	96.2	84.06	0
	chr10	54203305	54203515	DKK1	129264	80.4	52.71	4.78e-274
	chr10	54501762	54501972	MBL2	29489	55.9	293.01	5.79e-299
	chr10	55379553	55379763	MBL2	848093	30.2	158.25	1.12e-141
	chr10	59383922	59384132	MIR3924	319603	110.6	289.95	0
	chr10	59457599	59457809	MIR3924	393280	66.4	43.65	1.67e-213
	chr10	59924032	59924242	IPMK	103453	16.2	21.18	4.44e-40
	chr10	61045767	61045977	FAM13C	76685	70.1	45.94	2.32e-228
	chr10	61097060	61097270	FAM13C	25392	153.4	201.12	0
	chr10	62188519	62188729	ANK3	287745	62.7	164.37	1.13e-294
	chr10	62247953	62248163	CDK1	289927	211.4	92.39	0
	chr10	62254704	62254914	CDK1	283176	22.4	29.61	5.82e-64
	chr10	62520538	62520748	CDK1	17342	162.6	142.42	0
	chr10	62678688	62678898	RHOBTB1	25136	47.5	124.55	2.46e-208
	chr10	63648274	63648484	MIR548AV	87578	28	148.04	9.71e-131
	chr10	64096229	64096439	ZNF365	37478	165.5	144.63	0
	chr10	64397433	64397643	ADO	166874	41.1	35.9	4.71e-123
	chr10	64609967	64610177	EGR2	33841	11.7	30.63	1.43e-33
	chr10	67375131	67375341	ANXA2P3	789846	98.9	130.42	0
	chr10	69984675	69984885	ATOH7	6986	80.6	211.33	0
	chr10	71123176	71123386	HK1	44573	21.2	55.64	2.95e-74
	chr10	71888174	71888384	AIFM2	4307	8.18	21.44	7.54e-21
	chr10	73060768	73060978	SLC29A3	18033	11.7	61.26	2.13e-42
	chr10	73471104	73471314	C10orf105	8265	17.5	45.94	3.14e-57
	chr10	73480836	73481046	C10orf105	1258	16.9	88.82	1.3e-68
	chr10	73690556	73690766	CHST3	33355	45	58.96	5.76e-159
	chr10	73922971	73923181	ANAPC16	52578	38.6	33.86	8.41e-114
	chr10	73939798	73940008	ANAPC16	35751	65.8	86.27	3.84e-261
	chr10	73971090	73971300	ANAPC16	4459	21.2	28.08	1.42e-59
	chr10	74006523	74006733	DDIT4	26945	28.4	74.53	1.13e-108
	chr10	74030427	74030637	DDIT4	3041	53.7	70.7	2.02e-202
	chr10	74058028	74058238	DDIT4	24351	190.6	166.75	0
	chr10	74502603	74502813	MIR4676	21816	18.9	99.03	1.77e-78
	chr10	74649137	74649347	OIT3	3993	12.7	66.36	8.13e-48
	chr10	75647564	75647774	CAMK2G	13215	68.9	361.41	0
	chr10	76839600	76839810	DUPD1	21328	24.1	31.65	6.5e-70
	chr10	76901889	76902099	SAMD8	30496	36.8	48.75	2.28e-124
	chr10	79221515	79221725	KCNMA1	175853	32.1	168.45	9.46e-153
	chr10	79419155	79419365	KCNMA1	21578	259.5	227.33	0
	chr10	79658396	79658606	DLG5	27743	95.6	83.55	0
	chr10	80205924	80206134	LINC00595	178839	9.54	50.03	1.17e-33
	chr10	80812581	80812791	ZMIZ1-AS1	14415	14.6	76.57	4.22e-57
	chr10	80859780	80859990	ZMIZ1	30988	75.4	395.1	0
	chr10	81020666	81020876	PPIF	86345	12.7	33.18	4.36e-38
	chr10	81344940	81345150	SFTPA2	24777	6.81	35.73	1.3e-20
	chr10	81780109	81780319	TMEM254	58084	29.2	38.29	5.57e-90
	chr10	82230873	82231083	TSPAN14	16835	101.4	53.19	0
	chr10	82248351	82248561	TSPAN14	34313	41.3	216.44	1.41e-207
	chr10	82378905	82379115	SH2D4B	81247	136.3	178.66	0
	chr10	82507304	82507514	SH2D4B	209646	19.7	25.78	2.04e-52
	chr10	82565153	82565363	SH2D4B	267495	50.8	44.58	9.81e-165
	chr10	82937801	82938011	SH2D4B	640143	120.5	105.5	0
	chr10	83067125	83067335	NRG3	567736	21.4	112.3	1.18e-92
	chr10	83204072	83204282	NRG3	430789	26.9	140.89	4.29e-122
	chr10	84452364	84452574	NRG3	817294	17.3	90.86	1.44e-70
	chr10	85743481	85743691	GHITM	155495	29	152.12	4.26e-135
	chr10	86284929	86285139	CCSER2	196584	142.7	752.43	0
	chr10	86466281	86466491	CCSER2	377936	20.2	53.09	8.77e-71
	chr10	87307960	87308170	GRID1-AS1	29319	74	48.88	1.82e-248
	chr10	88873509	88873719	FAM35A	18556	24.5	32.41	2.03e-71
	chr10	89602928	89603138	KLLN	20057	552.4	483.92	0
	chr10	89738818	89739028	PTEN	115623	54.7	47.81	2.23e-181
	chr10	90020558	90020768	RNLS	322315	73.2	95.97	2.32e-298
	chr10	90750964	90751174	FAS	676	194.1	1017.87	0
	chr10	91001578	91001788	LIPA	10009	28.4	149.06	9.71e-131
	chr10	91292396	91292606	SLC16A12	2708	27.3	35.73	3.86e-82
	chr10	91811339	91811549	LOC101926924	94209	16.2	21.18	4.44e-40
	chr10	92049013	92049223	LOC101926942	251340	27.3	71.47	4.39e-103
	chr10	92244216	92244426	LOC101926942	56137	24.3	31.9	6.5e-70
	chr10	92737213	92737423	ANKRD1	56181	133.2	349.67	0
	chr10	93286135	93286345	LOC100188947	84873	24.3	21.27	3.02e-59
	chr10	94897974	94898184	CYP26A1	64742	175.8	231.24	0
	chr10	95417682	95417892	FRA10AC1	44438	13.8	73.51	2.37e-53
	chr10	96346081	96346291	HELLS	40557	45	235.84	9.2e-229
	chr10	96494462	96494672	CYP2C19	27792	20.1	105.16	1.67e-84
	chr10	96747981	96748191	CYP2C9	49566	20.4	53.6	8.77e-71
	chr10	97054883	97055093	PDLIM1	3978	97.4	127.87	0
	chr10	97099031	97099241	PDLIM1	48126	246.7	323.38	0
	chr10	97729969	97730179	CC2D2B	29670	38.2	100.05	3.98e-159
	chr10	98040669	98040879	BLNK	9396	12.5	32.67	1.44e-36
	chr10	98616287	98616497	LCOR	24270	23	60.24	4.49e-83
	chr10	98896432	98896642	LOC100505540	33919	37.4	49.26	4.64e-126
	chr10	99139244	99139454	RRP12	21674	8.76	23.48	1.48e-23
	chr10	99227597	99227807	ZDHHC16	21709	13.6	35.73	3.66e-41
	chr10	99309831	99310041	ANKRD2	22158	121.5	106.52	0
	chr10	99411577	99411787	PI4K2A	11134	110.6	41.49	0
	chr10	99461501	99461711	MARVELD1	11755	30.2	39.82	9.38e-95
	chr10	100025215	100025425	LOXL4	2583	127.1	333.85	0
	chr10	100151389	100151599	MIR1287	3466	10.1	53.09	2.24e-35
	chr10	100768934	100769144	HPSE2	226489	31.7	20.8	4.56e-77
	chr10	101803200	101803410	DNMBP	33524	75.7	66.19	7.53e-278
	chr10	102045791	102046001	BLOC1S2	469	91.9	120.47	0
	chr10	102598421	102598631	FAM178A	73696	14	73.51	2.37e-53
	chr10	102769401	102769611	LZTS2	12537	30.4	79.63	4.16e-118
	chr10	102981391	102981601	LBX1	7117	137.9	180.96	0
	chr10	103067920	103068130	BTRC	45661	25.3	66.36	6.86e-94
	chr10	103222182	103222392	BTRC	108392	9.54	50.03	1.17e-33
	chr10	103318052	103318262	POLL	29766	33.5	87.8	1.77e-133
	chr10	103650047	103650257	KCNIP2	46370	108.3	567.64	0
	chr10	104317706	104317916	SUFU	53987	26.1	68.4	1.51e-97
	chr10	104459934	104460144	ARL3	14047	18.1	47.47	1.45e-60
	chr10	104480129	104480339	SFXN2	5831	86.6	113.83	0
	chr10	104802109	104802319	CNNM2	124034	30	78.61	3.29e-116
	chr10	106211508	106211718	CCDC147	97986	40.9	53.6	1.82e-141
	chr10	106569087	106569297	SORCS3-AS1	143113	51.2	45.26	4.88e-168
	chr10	108199248	108199458	SORCS1	725009	32.7	42.88	1.9e-104
	chr10	109799680	109799890	SORCS1	875214	46.1	244	1.16e-240
	chr10	111654385	111654595	XPNPEP1	28717	21.6	28.33	1.42e-59
	chr10	111766727	111766937	ADD3	1001	36.4	19.3	9.04e-86
	chr10	111935263	111935473	MXI1	50290	26.5	34.71	4.81e-79
	chr10	112816840	112817050	ADRA2A	19741	67.2	35.22	3.66e-200
	chr10	112978113	112978323	ADRA2A	141323	12.5	65.34	5.37e-46
	chr10	114475953	114476163	MIR4295	82024	196.1	515.57	0
	chr10	114484331	114484541	MIR4295	90402	151.5	56.73	0
	chr10	114827396	114827606	TCF7L2	117387	71.8	37.77	6.54e-219
	chr10	115100976	115101186	HABP2	211593	54.3	28.59	4.65e-149
	chr10	115129144	115129354	HABP2	183425	10.5	27.57	3.5e-29
	chr10	115784619	115784829	ADRB1	18978	36.8	32.16	3.3e-106
	chr10	116438549	116438759	ABLIM1	5656	29.4	25.86	1.95e-78
	chr10	117879031	117879241	GFRA1	153886	23	60.24	4.49e-83
	chr10	118005580	118005790	GFRA1	27337	67.2	22.01	1.56e-165
	chr10	118394074	118394284	PNLIPRP2	13609	25.5	66.87	6.86e-94
	chr10	118537277	118537487	HSPA12A	35192	46.9	123.53	3.05e-206
	chr10	118727917	118728127	KIAA1598	36962	15.2	39.82	1.85e-47
	chr10	118976433	118976643	KCNK18	19433	60.9	79.89	3.4e-236
	chr10	120130682	120130892	LINC00867	14062	22.2	58.19	1.59e-79
	chr10	120756233	120756443	NANOS1	32786	35.2	46.96	1.18e-117
	chr10	120763270	120763480	NANOS1	25749	33.7	29.44	2.69e-94
	chr10	121084700	121084910	MIR4681	52575	30.2	158.25	1.12e-141
	chr10	122155789	122155999	PPAPDC1A	60468	25.3	22.12	2.96e-63
	chr10	122263928	122264138	PPAPDC1A	47462	245.1	643.7	0
	chr10	123370564	123370774	FGFR2	17083	9.93	26.03	9.47e-28
	chr10	123830019	123830229	TACC2	42326	18.7	98.01	1.77e-78
	chr10	123916266	123916476	TACC2	43712	7.79	40.84	2.38e-25
	chr10	124456605	124456815	C10orf120	2524	9.15	23.99	1.48e-23
	chr10	124717027	124717237	C10orf88	3108	120.1	79.25	0
	chr10	125205000	125205210	GPR26	220662	20.6	108.22	1.46e-88
	chr10	125298462	125298672	GPR26	127200	76.3	40.12	5.45e-238
	chr10	126729701	126729911	MIR4296	8262	79.8	104.65	0
	chr10	126776208	126776418	MIR4296	54769	278.6	243.49	0
	chr10	127141717	127141927	TEX36-AS1	121014	23.6	123.53	5.18e-103
	chr10	127656220	127656430	FANK1-AS1	5413	303.5	398.42	0
	chr10	128831943	128832153	FAM196A	162270	62.1	81.42	6.51e-242
	chr10	129661531	129661741	CLRN3	29471	779.4	1023.49	0
	chr10	129787598	129787808	PTPRE	82273	15.4	20.16	1.92e-37
	chr10	129885501	129885711	MKI67	38758	21.8	57.17	9.24e-78
	chr10	132188290	132188500	GLRX3	253651	32.3	28.25	1.86e-88
	chr10	132893026	132893236	MIR378C	132095	13.2	69.42	1.2e-49
	chr10	133609881	133610091	LINC01164	12445	50.4	265.44	9.96e-265
	chr10	133829322	133829532	BNIP3	33887	60.7	159.78	1.26e-283
	chr10	134237869	134238079	C10orf91	20636	16.9	22.21	9.37e-43
	chr10	134481223	134481433	NKX6-2	118105	58.6	38.8	8.19e-183
	chr10	135038984	135039194	UTF1	4585	10.9	57.17	7.41e-39
	chr10	135058546	135058756	MIR202	2369	26.7	69.93	2.18e-99
	chr10	135513543	135513753	DUX4L3	26366	29.6	77.59	2.57e-114
	chr11	283870	284080	ATHL1	5059	78.3	68.4	1.2e-290
	chr11	364381	364591	B4GALNT4	5205	13.6	36.24	1.02e-42
	chr11	439914	440124	ANO9	1888	9.54	50.03	1.17e-33
	chr11	804307	804517	PIDD1	734	65.8	57.51	2.76e-231
	chr11	1073643	1073853	MUC2	1023	24.3	21.27	3.02e-59
	chr11	1598166	1598376	KRTAP5-AS1	4195	65.6	344.06	0
	chr11	1676601	1676811	FAM99A	10019	8.96	24.5	6.18e-25
	chr11	1851963	1852173	SYT8	3368	285.4	249.79	0
	chr11	1894866	1895076	MIR4298	14100	27.6	36.24	1.07e-83
	chr11	2395314	2395524	CD81	3024	18.3	23.99	7.68e-47
	chr11	3317671	3317881	MRGPRE	64055	188.1	164.54	0
	chr11	3416835	3417045	OR7E12P	3690	16	41.86	1.13e-50
	chr11	3457641	3457851	OR7E12P	44496	33.9	29.61	2.69e-94
	chr11	3512442	3512652	OR7E12P	99297	7.59	19.91	3.18e-18
	chr11	3637321	3637531	TRPC2	10160	296	194.23	0
	chr11	4475377	4475587	OR52K2	4852	124.4	81.93	0
	chr11	4485560	4485770	OR52K2	15035	898.6	1179.44	0
	chr11	4888403	4888613	OR51T1	14437	97.7	64.19	0
	chr11	5711684	5711894	TRIM22	867	779.8	170.79	0
	chr11	5887084	5887294	OR52E8	8152	32.1	84.74	1.12e-127
	chr11	6825883	6826093	OR6A2	8744	7.4	38.8	9.51e-24
	chr11	7461271	7461481	LOC100506258	25586	7.79	20.42	1.59e-19
	chr11	8160172	8160382	RIC3	30209	55.1	288.93	4.9e-294
	chr11	8604915	8605125	STK33	10712	13.2	34.71	1.28e-39
	chr11	8854294	8854504	ST5	22070	17.5	22.97	4.16e-44
	chr11	9075586	9075796	MIR5691	36131	11.3	29.61	4.3e-32
	chr11	9166904	9167114	KRT8P41	50994	14.8	38.8	7.22e-46
	chr11	9497056	9497266	ZNF143	14544	37.6	197.04	2.03e-184
	chr11	9611156	9611366	WEE1	15928	8.37	21.95	7.54e-21
	chr11	9631597	9631807	WEE1	36369	93.5	492.09	0
	chr11	9823906	9824116	LOC101928008	36574	43.4	22.77	3.04e-108
	chr11	9967805	9968015	LOC101928008	107116	53.3	34.97	9.52e-158
	chr11	10066199	10066409	LOC101928008	205510	481.7	1264.43	0
	chr11	10521891	10522101	MIR4485	7773	23	60.24	4.49e-83
	chr11	10921100	10921310	ZBED5-AS1	41336	26.1	34.2	1.66e-77
	chr11	11697340	11697550	MIR4299	19071	25.1	65.85	4.53e-92
	chr11	12087578	12087788	MICAL2	44336	123.4	46.31	0
	chr11	12101486	12101696	MICAL2	30428	52.4	22.89	2.09e-131
	chr11	12211199	12211409	MIR6124	25969	57.8	37.9	1.78e-176
	chr11	12830595	12830805	TEAD1	134626	37.4	24.5	2.03e-97
	chr11	13095010	13095220	RASSF10	64040	50.6	33.31	1.51e-148
	chr11	13483837	13484047	BTBD10	792	53.9	70.96	2.02e-202
	chr11	13688330	13688540	FAR1	1667	339.6	127.54	0
	chr11	15117467	15117677	CALCB	22321	31.9	83.72	9.44e-126
	chr11	16654467	16654677	C11orf58	105472	51.2	134.25	1.86e-229
	chr11	16797160	16797370	C11orf58	37012	63.5	33.28	8.25e-185
	chr11	17134388	17134598	RPS13	35168	93.1	122	0
	chr11	17391476	17391686	NCR3LG1	18167	104.9	55.13	0
	chr11	17400274	17400484	KCNJ11	9723	103.2	271.06	0
	chr11	17493131	17493341	ABCC8	5052	64.1	83.97	1.7e-251
	chr11	17718207	17718417	MYOD1	22694	16.7	21.95	2.06e-41
	chr11	18921714	18921924	MRGPRX1	34626	5.06	26.54	1.19e-14
	chr11	19554928	19555138	NAV2-AS4	9303	28.4	149.06	9.71e-131
	chr11	20072127	20072337	NAV2-AS2	1278	36.6	95.97	3.6e-149
	chr11	20496489	20496699	PRMT3	87413	45.6	59.98	1.64e-162
	chr11	20505580	20505790	PRMT3	96504	189.6	498.73	0
	chr11	27537483	27537693	MIR8087	889	25.3	22.12	2.96e-63
	chr11	27545768	27545978	MIR8087	9174	53.5	47.13	5.04e-178
	chr11	27657359	27657569	LINC00678	1185	261.1	686.58	0
	chr11	28312629	28312839	METTL15	182831	39.3	34.37	7.2e-117
	chr11	28542726	28542936	MIR8068	43631	328.3	430.84	0
	chr11	30219482	30219692	FSHB	32872	46.3	121.49	4.58e-202
	chr11	30522769	30522979	MPPED2	84952	19.5	25.52	2.04e-52
	chr11	31994937	31995147	LOC100506675	67718	20.6	54.11	1.62e-72
	chr11	32102805	32103015	RCN1	9463	148.8	196.02	0
	chr11	32325236	32325446	WT1	131636	268.7	704.45	0
	chr11	32644607	32644817	EIF3M	39294	8.57	44.92	1.29e-28
	chr11	33067478	33067688	TCP11L1	6515	32.1	21.06	2.17e-78
	chr11	33083089	33083299	LINC00294	14398	95.6	35.81	5.46e-285
	chr11	33677947	33678157	C11orf91	44130	31.9	41.86	3.4e-101
	chr11	34374225	34374435	ABTB2	5121	15	19.65	3.84e-36
	chr11	34707039	34707249	EHF	53028	199.6	130.94	0
	chr11	35606001	35606211	FJX1	33525	26.7	23.48	1.09e-68
	chr11	35947988	35948198	LDLRAD3	17415	10.7	57.17	7.41e-39
	chr11	36039829	36040039	MIR3973	8181	37.4	49.26	4.64e-126
	chr11	36302200	36302410	COMMD9	8590	49.8	131.19	4.38e-223
	chr11	36720884	36721094	RAG2	101055	35.2	23.23	3.77e-89
	chr11	38616577	38616787	LOC103312105	51120	24.7	32.41	2.03e-71
	chr11	40130141	40130351	LRRC4C	184330	12.5	65.34	5.37e-46
	chr11	41507791	41508001	LOC100507205	767240	259	97.13	0
	chr11	41592952	41593162	LOC100507205	682079	151.7	49.71	0
	chr11	41810982	41811192	LOC100507205	464049	51.6	270.55	5.18e-272
	chr11	42793492	42793702	HNRNPKP3	497218	63.1	165.39	6.82e-297
	chr11	43148954	43149164	HNRNPKP3	141756	103.4	135.53	0
	chr11	43973306	43973516	C11orf96	9200	135.9	118.94	0
	chr11	45021119	45021329	LOC221122	25666	31.3	27.4	1.45e-85
	chr11	45758054	45758264	LOC100507384	14196	63.9	55.81	1.61e-222
	chr11	46432229	46432439	CHRM4	24122	14	37.26	2.75e-44
	chr11	46653377	46653587	ATG13	14551	22.6	59.21	2.7e-81
	chr11	46679376	46679586	ATG13	40550	167.8	440.02	0
	chr11	46709129	46709339	ARHGAP1	12877	28.4	74.53	1.13e-108
	chr11	47008905	47009115	C11orf49	50665	16.9	22.21	9.37e-43
	chr11	47236440	47236650	DDB2	0	412.6	270.93	0
	chr11	47604656	47604866	FAM180B	3365	17.7	23.23	1.81e-45
	chr11	56864721	56864931	OR5AK4P	59712	21.4	28.08	1.42e-59
	chr11	56977920	56978130	APLNR	26798	35	30.63	9.97e-99
	chr11	57424720	57424930	CLP1	287	33.7	44.16	2.31e-109
	chr11	57436963	57437173	ZDHHC5	1489	25.5	66.87	6.86e-94
	chr11	57555953	57556163	CTNND1	26719	53.2	139.87	3.85e-240
	chr11	57793743	57793953	OR9Q1	2390	39.3	51.56	1.41e-134
	chr11	58426073	58426283	CNTF	35927	62.3	54.62	1.49e-215
	chr11	58561708	58561918	GLYATL2	50080	61.3	321.6	0
	chr11	58937256	58937466	DTX4	2347	44.6	23.38	2.5e-112
	chr11	59341029	59341239	MIR3162	21393	81.6	53.47	3.21e-279
	chr11	59348165	59348375	MIR3162	14257	58.8	51.56	4.92e-200
	chr11	60331167	60331377	MS4A13	48281	235.4	619.2	0
	chr11	60553523	60553733	MS4A10	702	11.1	29.1	4.3e-32
	chr11	60703183	60703393	TMEM132A	11270	20.4	27.05	1.1e-56
	chr11	61038370	61038580	VWCE	24209	82.6	43.49	1.51e-265
	chr11	61065164	61065374	VWCE	2376	211.6	92.48	0
	chr11	61068162	61068372	VWCE	5374	30.4	19.91	7.87e-72
	chr11	61137237	61137447	CYB561A3	7482	17.5	23.23	1.81e-45
	chr11	61262832	61263042	MIR4488	13027	26.9	35.48	1.37e-80
	chr11	61548395	61548605	MIR611	11429	19.3	101.07	1.77e-80
	chr11	61587693	61587903	FADS1	3164	290.5	190.53	0
	chr11	61748786	61748996	FTH1	13654	250.4	219.16	0
	chr11	61766545	61766755	FTH1	31413	611	534.29	0
	chr11	61863732	61863942	INCENP	27504	61.9	162.33	3.01e-290
	chr11	61866879	61867089	INCENP	24357	66	86.52	4.44e-263
	chr11	61990416	61990626	SCGB2A1	14276	1176.8	617.56	0
	chr11	62053165	62053375	SCGB1D4	13162	210.3	275.65	0
	chr11	62198595	62198805	SCGB1A1	12088	106.9	56.05	0
	chr11	62310591	62310801	AHNAK	3532	50.6	66.36	6.69e-186
	chr11	62367458	62367668	MTA2	1645	71.7	23.55	7.85e-182
	chr11	63313273	63313483	MIR3680-1	7642	44.2	57.94	1.96e-155
	chr11	63333290	63333500	HRASLS2	2435	40.7	53.34	9.76e-140
	chr11	63559035	63559245	C11orf84	21679	617.8	202.59	0
	chr11	64092283	64092493	PRDX5	6723	28.4	149.06	9.71e-131
	chr11	64204932	64205142	LOC100996455	11388	68.3	59.89	1.15e-243
	chr11	64610542	64610752	CDC42BPG	1290	240.7	315.72	0
	chr11	64808692	64808902	SAC3D1	316	139.6	61.17	0
	chr11	64921495	64921705	SPDYC	16003	76.5	200.61	0
	chr11	65149684	65149894	SLC25A45	1279	83.7	24.39	1.18e-214
	chr11	65188696	65188906	NEAT1	1364	840	367.45	0
	chr11	65551531	65551741	OVOL1	2765	30.2	26.37	2.85e-81
	chr11	65617223	65617433	CFL1	8372	57.8	75.8	4.54e-221
	chr11	65666618	65666828	FOSL1	1170	174.3	45.74	0
	chr11	66386814	66387024	RBM14	2761	298.3	130.42	0
	chr11	66386814	66387024	RBM14-RBM4	2761	298.3	130.42	0
	chr11	66850030	66850240	RHOD	25741	48.5	42.37	6.65e-155
	chr11	67423861	67424071	ACY3	5731	754.1	247.51	0
	chr11	67487508	67487718	ALDH3B2	45406	8.96	47.98	2.8e-30
	chr11	67630444	67630654	FAM86C2P	57637	5.84	30.63	1.42e-17
	chr11	68049640	68049850	C11orf24	10171	59.8	26.12	8.5e-158
	chr11	68104840	68105050	LRP5	24763	36.6	31.99	1.06e-104
	chr11	68706492	68706702	IGHMBP2	35173	22	57.68	9.24e-78
	chr11	68917177	68917387	LOC338694	21644	456.4	239.61	0
	chr11	69316434	69316644	LOC101928292	16105	64.3	33.79	7.35e-188
	chr11	69325358	69325568	LOC101928292	25029	223.1	117.61	0
	chr11	69624394	69624604	FGF3	9589	41.7	36.58	3.6e-126
	chr11	70460452	70460662	SHANK2-AS1	16538	59.2	155.18	7.73e-275
	chr11	70490062	70490272	SHANK2-AS1	12863	142.7	124.89	0
	chr11	70615758	70615968	SHANK2-AS3	92928	24.5	128.64	2.59e-109
	chr11	70971338	70971548	FLJ42102	162853	16.9	88.82	1.3e-68
	chr11	71656226	71656436	RNF121	16458	61.1	40.07	8.51e-191
	chr11	71795224	71795434	NUMA1	3704	7.2	37.77	3.61e-22
	chr11	72008643	72008853	PHOX2A	53423	8.37	43.9	5.66e-27
	chr11	72260602	72260812	MIR139	65363	8.37	21.95	7.54e-21
	chr11	72354808	72355018	MIR139	28634	19.5	102.09	1.74e-82
	chr11	72491665	72491875	MIR4692	2701	8.76	45.94	1.29e-28
	chr11	72542855	72543065	ATG16L2	17404	10.5	27.57	3.5e-29
	chr11	72953897	72954107	P2RY2	24395	23	20.08	2.67e-55
	chr11	73610073	73610283	COA4	22183	11.9	31.14	4.62e-35
	chr11	73846363	73846573	C2CD3	35492	145.8	127.45	0
	chr11	74216070	74216280	LIPT2	11315	65.6	86.27	3.84e-261
	chr11	74909668	74909878	TPBGL	42073	19.9	105.16	1.67e-84
	chr11	75067629	75067839	ARRB1	4754	12.9	67.38	8.13e-48
	chr11	75211877	75212087	GDPD5	24513	15.2	39.82	1.85e-47
	chr11	76278445	76278655	LRRC32	102390	48.7	63.81	7.76e-177
	chr11	76495653	76495863	TSKU	1368	19.1	25.01	5.21e-51
	chr11	77271874	77272084	AQP11	28597	29.6	25.86	1.95e-78
	chr11	77514266	77514476	RSF1	17405	6.43	34.71	1.3e-20
	chr11	77878174	77878384	KCTD21	21281	7.4	19.4	3.18e-18
	chr11	78867125	78867335	MIR708	245819	54.5	285.86	4.04e-289
	chr11	78868865	78869075	MIR708	244079	15.6	81.67	6.76e-61
	chr11	78879829	78880039	MIR708	233115	20.1	105.16	1.67e-84
	chr11	83372852	83373062	CCDC90B	375402	133.2	174.84	0
	chr11	83744877	83745087	CCDC90B	747427	14.6	76.57	4.22e-57
	chr11	84995520	84995730	TMEM126B	343888	15	39.31	1.85e-47
	chr11	85518041	85518251	CCDC83	47894	24.7	21.78	6.51e-62
	chr11	85858877	85859087	PICALM	77954	8.57	22.46	3.42e-22
	chr11	86046548	86046758	C11orf73	33295	195.9	514.04	0
	chr11	86739829	86740039	TMEM135	8848	77.1	33.86	3.62e-227
	chr11	87315309	87315519	TMEM135	566423	46.3	40.5	3.4e-145
	chr11	89041396	89041606	TYR	130356	8.96	46.96	2.8e-30
	chr11	89114213	89114423	NOX4	110311	5.06	26.54	1.19e-14
	chr11	89137065	89137275	NOX4	87459	20.8	27.31	1.1e-56
	chr11	92046762	92046972	FAT3	38291	10.9	28.59	1.25e-30
	chr11	92753541	92753751	MTNR1B	50752	29.8	39.05	3.71e-93
	chr11	93752348	93752558	HEPHL1	1821	23.2	121.49	6.32e-101
	chr11	93838019	93838229	PANX1	23866	15.6	20.42	1.92e-37
	chr11	93845847	93846057	PANX1	16038	47.7	125.06	1.97e-210
	chr11	93888435	93888645	PANX1	26341	13.8	72.49	2.37e-53
	chr11	94038459	94038669	FOLR4	135	51.4	67.38	1.5e-189
	chr11	94768588	94768798	KDM4E	10166	33.9	178.66	5.94e-164
	chr11	94798607	94798817	SRSF8	1225	276.1	362.69	0
	chr11	95302136	95302346	FAM76B	220609	85.7	225.12	0
	chr11	95842801	95843011	MTMR2	185430	8.96	23.48	1.48e-23
	chr11	95916359	95916569	MIR1260B	158034	15.4	40.33	4.62e-49
	chr11	97046364	97046574	MIR7976	444322	15	39.82	1.85e-47
	chr11	97562768	97562978	MIR7976	71873	23.6	124.55	4.18e-105
	chr11	97614254	97614464	MIR7976	123359	41.7	54.62	6.2e-145
	chr11	100079063	100079273	ARHGAP42	479135	47.3	248.09	1.89e-245
	chr11	100263894	100264104	ARHGAP42	294304	15.6	81.67	6.76e-61
	chr11	100383345	100383555	ARHGAP42	174853	24.7	65.34	4.53e-92
	chr11	100560654	100560864	ARHGAP42	2247	35.8	187.85	5.29e-173
	chr11	100677956	100678166	ARHGAP42	119549	13.6	35.73	3.66e-41
	chr11	101257997	101258207	MIR3920	132430	17.5	45.94	3.14e-57
	chr11	101305067	101305277	MIR3920	85360	30.6	80.14	5.2e-120
	chr11	101612589	101612799	TRPC6	157930	7.59	39.82	9.51e-24
	chr11	102127076	102127286	BIRC3	60896	155.6	102.35	0
	chr11	103392416	103392626	MIR4693	328009	65.6	86.01	3.84e-261
	chr11	104208997	104209207	PDGFD	173970	16.4	42.88	2.68e-52
	chr11	106044818	106045028	LOC101928535	77107	19.3	25.27	5.21e-51
	chr11	106100846	106101056	LOC101928535	21079	69.3	364.47	0
	chr11	106660229	106660439	GUCY1A2	228733	8.76	22.97	3.42e-22
	chr11	108109047	108109257	ATM	15488	28.8	37.77	2.12e-88
	chr11	108205957	108206167	ATM	112398	46.5	61	7.41e-168
	chr11	108819070	108819280	DDX10	283318	139.2	730.99	0
	chr11	109213056	109213266	C11orf87	79581	9.15	47.98	2.8e-30
	chr11	109893344	109893554	ZC3H12C	70534	81.2	70.96	1.51e-303
	chr11	110224180	110224390	RDX	56743	10.5	55.13	4.15e-37
	chr11	111098558	111098768	C11orf53	27940	5.65	29.61	4.25e-16
	chr11	111381178	111381388	BTG4	1692	269.5	353.5	0
	chr11	111461872	111462082	SIK2	11089	19.9	52.07	4.65e-69
	chr11	111590293	111590503	PPP2R1B	46667	34.1	89.33	2.25e-137
	chr11	112283019	112283229	LOC101928823	69727	16	83.72	8.25e-63
	chr11	112496687	112496897	LOC387810	70162	129.5	678.92	0
	chr11	112784622	112784832	NCAM1	47138	10.3	27.05	3.5e-29
	chr11	113215088	113215298	TTC12	29837	25.1	131.7	1.99e-111
	chr11	113255412	113255622	ANKK1	2892	44.8	58.7	5.76e-159
	chr11	113317733	113317943	MIR4301	2868	35	91.88	2.75e-141
	chr11	113367078	113367288	DRD2	21077	4.48	24.5	3.09e-13
	chr11	114069443	114069653	NNMT	96883	22.6	29.61	5.82e-64
	chr11	115458489	115458699	CADM1	83248	9.54	50.03	1.17e-33
	chr11	117164986	117165196	BACE1-AS	2924	13.8	72.49	2.37e-53
	chr11	117377126	117377336	CEP164	178555	20.6	108.22	1.46e-88
	chr11	117615520	117615730	DSCAML1	52247	8.37	22.46	3.42e-22
	chr11	117963714	117963924	TMPRSS4-AS1	6206	20.1	105.16	1.67e-84
	chr11	118023982	118024192	SCN4B	352	30.6	160.29	7.01e-144
	chr11	118922913	118923123	HYOU1	4835	5.26	27.57	1.19e-14
	chr11	118996275	118996485	HINFP	4042	4.48	24.5	3.09e-13
	chr11	119247131	119247341	USP2-AS1	5148	14.4	76.57	4.22e-57
	chr11	119483642	119483852	PVRL1	115584	32.5	86.27	1.54e-131
	chr11	119567171	119567381	PVRL1	32055	57	150.59	6.48e-264
	chr11	119640336	119640546	PVRL1	40901	19.3	50.54	1.23e-65
	chr11	119716498	119716708	PVRL1	117063	23.2	60.75	4.49e-83
	chr11	119895735	119895945	TRIM29	112919	184.4	241.96	0
	chr11	119926337	119926547	TRIM29	82317	43.6	229.71	1.15e-221
	chr11	120249314	120249524	ARHGEF12	41696	9.74	51.05	1.17e-33
	chr11	120330888	120331098	GRIK4	51368	9.93	26.03	9.47e-28
	chr11	120473758	120473968	GRIK4	91293	7.79	40.84	2.38e-25
	chr11	121107160	121107370	SC5D	56019	27.6	145.99	2.1e-126
	chr11	121353301	121353511	SORL1	30389	24.5	64.32	2.94e-90
	chr11	122213118	122213328	MIR100HG	139348	24.9	65.34	4.53e-92
	chr11	123549044	123549254	SCN3B	23729	29.6	155.18	2.76e-137
	chr11	123628777	123628987	OR6X1	3551	24.9	32.67	6.24e-73
	chr11	124093171	124093381	OR8G2	1964	46.1	120.98	5.55e-200
	chr11	124510675	124510885	TBRG1	17933	56.3	73.76	1.42e-213
	chr11	124816855	124817065	CCDC15	6953	22.4	117.41	8.95e-97
	chr11	124899361	124899571	SLC37A2	33443	11.7	31.14	4.62e-35
	chr11	126188619	126188829	DCPS	14972	21	55.13	2.95e-74
	chr11	126428330	126428540	LOC101929427	94134	10.1	26.54	9.47e-28
	chr11	126902053	126902263	KIRREL3-AS3	29248	38.7	203.17	2.54e-191
	chr11	129495916	129496126	TMEM45B	189616	22.6	59.21	2.7e-81
	chr11	129511912	129512122	TMEM45B	173620	18.5	24.25	3.2e-48
	chr11	129906973	129907183	APLP2	32534	21.8	28.59	4.98e-61
	chr11	130192364	130192574	ZBTB44	7757	17.5	45.94	3.14e-57
	chr11	130752721	130752931	SNX19	33452	87.2	228.69	0
	chr11	131958528	131958738	NTM	177816	74.2	64.83	1.39e-270
	chr11	134260075	134260285	B3GAT1	21528	5.06	26.54	1.19e-14
	chr12	633731	633941	B4GALNT3	64188	60.4	79.12	2.7e-234
	chr12	957020	957230	WNK1	94931	380.1	498.47	0
	chr12	2113714	2113924	DCP1B	37	376.6	164.71	0
	chr12	2499375	2499585	CACNA1C-IT3	120433	65	56.83	9.01e-228
	chr12	2806360	2806570	CACNA1C-AS1	6037	148.8	130.51	0
	chr12	3326595	3326805	TSPAN9	140074	205.2	179.68	0
	chr12	3409151	3409361	PRMT8	81155	52.2	45.6	1.08e-169
	chr12	4222077	4222287	CCND2	160616	666.9	437.6	0
	chr12	4361115	4361325	CCND2	21578	27.5	23.99	4.59e-70
	chr12	5249253	5249463	KCNA5	96168	189.4	165.9	0
	chr12	5935119	5935329	ANO2	120070	25.5	33.44	1.89e-74
	chr12	6616878	6617088	SCARNA10	2301	301	394.85	0
	chr12	7146823	7147033	C1S	20948	229.9	201.29	0
	chr12	7163199	7163409	C1S	4572	15	19.91	3.84e-36
	chr12	7825231	7825441	APOBEC1	6729	39.3	103.11	3.75e-165
	chr12	9108786	9108996	M6PR	6429	202.5	531.4	0
	chr12	9500003	9500213	LOC101930452	19848	27.1	70.96	3.12e-101
	chr12	9878147	9878357	CLECL1	7539	102.8	90.35	0
	chr12	10050219	10050429	KLRF2	16131	21.6	28.33	1.42e-59
	chr12	10063765	10063975	CLEC2A	21006	417.3	547.99	0
	chr12	10225973	10226183	CLEC1A	25423	42.3	27.69	2.02e-114
	chr12	10870073	10870283	YBX3	5671	193.9	1016.85	0
	chr12	11071530	11071740	TAS2R13	9369	70.5	61.6	1.4e-252
	chr12	11394836	11395046	PRB3	27596	53.5	140.38	2.75e-242
	chr12	11481699	11481909	PRB4	18330	16	41.86	1.13e-50
	chr12	11496885	11497095	PRB1	11430	38	99.54	3.98e-157
	chr12	11561168	11561378	PRB2	12670	23.4	122.51	5.18e-103
	chr12	11788358	11788568	ETV6	14221	182.8	239.66	0
	chr12	11983587	11983797	RNU6-19P	95311	72.2	95.2	2.22e-296
	chr12	12200067	12200277	BCL2L14	24126	71.8	47.22	1.07e-236
	chr12	12598906	12599116	LOH12CR1	88886	126.8	66.46	0
	chr12	12622491	12622701	DUSP16	92748	15	78.61	5.41e-59
	chr12	13226958	13227168	GSG1	29463	21.2	56.15	5.27e-76
	chr12	13252841	13253051	GSG1	3580	31.7	27.91	5.22e-87
	chr12	13259648	13259858	GSG1	3018	10.1	26.54	9.47e-28
	chr12	13492595	13492805	C12orf36	36875	23	60.24	4.49e-83
	chr12	14652515	14652725	LOC101928290	67942	43	225.63	5.92e-217
	chr12	14818365	14818575	GUCY2C	30945	8.37	43.9	5.66e-27
	chr12	15688325	15688535	PTPRO	213134	170.4	149.06	0
	chr12	16089698	16089908	DERA	25512	141.9	186.07	0
	chr12	18502692	18502902	PIK3C2G	88218	96.8	253.7	0
	chr12	18539622	18539832	PIK3C2G	125148	61.1	53.94	4.38e-212
	chr12	19249906	19250116	PLEKHA5	32511	25.5	22.29	2.96e-63
	chr12	19584859	19585069	AEBP2	7540	635.5	833.34	0
	chr12	20628426	20628636	PDE3A	106247	79.8	418.58	0
	chr12	21168315	21168525	SLCO1B7	106	6.04	31.65	1.42e-17
	chr12	22254727	22254937	CMAS	55617	165.5	86.88	0
	chr12	22984020	22984230	ETNK1	205944	75.7	99.29	2.77e-312
	chr12	23052307	23052517	ETNK1	274231	16.4	42.88	2.68e-52
	chr12	25147346	25147556	C12orf77	2818	30.4	39.82	9.38e-95
	chr12	25207117	25207327	LRMP	1936	102.2	67.13	0
	chr12	25864288	25864498	IFLTD1	158071	354.2	154.93	0
	chr12	26045310	26045520	MIR4302	18298	19.3	25.52	2.04e-52
	chr12	26070300	26070510	RASSF8-AS1	41866	27.5	73.51	8.34e-107
	chr12	26901737	26901947	ITPR2	84185	229.4	120.67	0
	chr12	27129682	27129892	TM7SF3	37448	22	19.23	2.03e-51
	chr12	27165888	27166098	TM7SF3	1242	47.7	250.13	7.57e-248
	chr12	27702183	27702393	PPFIBP1	25138	67.6	35.53	1.03e-201
	chr12	28355437	28355647	CCDC91	54487	169.4	111.15	0
	chr12	28385671	28385881	CCDC91	24253	36.6	47.98	5.3e-121
	chr12	29552090	29552300	OVCH1-AS1	9863	24.5	21.61	1.41e-60
	chr12	31079954	31080164	TSPAN11	116	21.8	115.37	1.04e-94
	chr12	31399344	31399554	FLJ13224	77697	38	49.77	9.38e-128
	chr12	31589517	31589727	FAM60A	110358	73.6	385.91	0
	chr12	31727286	31727496	DENND5B-AS1	15362	16.5	43.39	6.23e-54
	chr12	32401824	32402034	BICD1	141639	240.7	157.73	0
	chr12	34382307	34382517	ALG10	207091	13.8	72.49	2.37e-53
	chr12	40422207	40422417	SLC2A13	77245	41.1	26.93	4.08e-110
	chr12	40552780	40552990	SLC2A13	53119	1134.7	63.43	0
	chr12	40803334	40803544	MUC19	16138	18.1	94.95	1.67e-74
	chr12	40868566	40868776	MUC19	81370	17.5	91.88	1.44e-70
	chr12	41332627	41332837	CNTN1	246383	34.1	89.33	2.25e-137
	chr12	43094474	43094684	LOC101927058	54174	15.8	41.35	1.13e-50
	chr12	44278973	44279183	TMEM117	49309	8.76	22.97	3.42e-22
	chr12	44423087	44423297	TMEM117	193423	34.5	30.12	3.02e-97
	chr12	45276673	45276883	NELL2	30829	32.9	86.78	1.54e-131
	chr12	46465178	46465388	SCAF11	80777	47.1	61.77	1.2e-169
	chr12	46478588	46478798	SCAF11	94187	51.6	33.82	1.33e-151
	chr12	46501475	46501685	SCAF11	117074	180.9	237.37	0
	chr12	46696792	46697002	SLC38A1	33584	9.93	26.03	9.47e-28
	chr12	46971318	46971528	SLC38A2	204673	79.4	104.14	0
	chr12	47482311	47482521	AMIGO2	8577	46.5	24.4	1.34e-120
	chr12	47697981	47698191	PCED1B-AS1	87755	87.4	38.2	1.19e-267
	chr12	47766976	47767186	PCED1B-AS1	156750	51.4	27.05	5.97e-139
	chr12	47903514	47903724	RPAP3	196121	65	42.62	5.79e-207
	chr12	47950145	47950355	RPAP3	149490	58.6	51.56	4.92e-200
	chr12	48270381	48270591	VDR	28224	53.5	70.19	1.42e-200
	chr12	48564694	48564904	CCDC184	12463	163.6	21.57	0
	chr12	48604366	48604576	OR10AD1	7291	491.8	129.35	0
	chr12	48748518	48748728	ZNF641	3489	27.1	23.65	1.09e-68
	chr12	48858935	48859145	ANP32D	7304	119	104.31	0
	chr12	48996047	48996257	LALBA	32218	420.8	552.58	0
	chr12	49682854	49683064	PRPH	5846	31.7	83.21	9.44e-126
	chr12	50564207	50564417	CERS5	2891	205.6	270.55	0
	chr12	50774234	50774444	FAM186A	15962	27.5	35.99	3.86e-82
	chr12	51322226	51322436	METTL7A	3692	143.5	188.36	0
	chr12	51601840	51602050	POU6F1	9428	5.84	30.63	1.42e-17
	chr12	52270695	52270905	ANKRD33	10889	5.84	30.63	1.42e-17
	chr12	52569872	52570082	KRT80	15703	669.2	878.77	0
	chr12	52781783	52781993	KRT84	2366	26.1	34.2	1.66e-77
	chr12	52976709	52976919	KRT74	9100	45.8	30.12	5e-129
	chr12	54235082	54235292	CISTR	89463	12.3	32.16	1.44e-36
	chr12	54569770	54569980	SMUG1	12799	33.9	177.64	1.06e-161
	chr12	54635002	54635212	MIR3198-2	9742	24.5	64.32	2.94e-90
	chr12	54786306	54786516	ZNF385A	1217	23	120.47	6.32e-101
	chr12	55075129	55075339	DCD	32980	22.6	118.43	7.59e-99
	chr12	55566544	55566754	OR9K2	42991	34.1	89.33	2.25e-137
	chr12	57374053	57374263	GPR182	14093	27.8	36.5	1.07e-83
	chr12	57425278	57425488	TAC3	14934	137.3	51.41	0
	chr12	57489967	57490177	NAB2	7290	215.1	188.19	0
	chr12	57723792	57724002	R3HDM2	19546	35.4	30.97	3.25e-100
	chr12	57776078	57776288	INHBC	52181	457.6	48.02	0
	chr12	57839777	57839987	INHBE	9110	336.5	30.42	0
	chr12	58656631	58656841	XRCC6BP1	321186	23.8	124.55	4.18e-105
	chr12	58898645	58898855	LOC101927653	276644	45	58.96	5.76e-159
	chr12	59281952	59282162	LRIG3	32158	25.5	134.76	1.13e-115
	chr12	59300799	59301009	LRIG3	13311	76.5	50.15	6.12e-257
	chr12	59434982	59435192	LRIG3	120663	114.1	29.96	4.60e-318
	chr12	59747768	59747978	SLC16A7	241844	13.8	36.24	1.02e-42
	chr12	59751648	59751858	SLC16A7	237964	48.3	63.3	4.93e-175
	chr12	60038098	60038308	SLC16A7	48277	16	85.76	9.82e-65
	chr12	61315000	61315210	FAM19A2	1271411	25.7	33.95	5.64e-76
	chr12	62087643	62087853	FAM19A2	498768	14.8	19.4	7.5e-35
	chr12	62586745	62586955	FAM19A2	125	198.6	523.23	0
	chr12	63614078	63614288	AVPR1A	67488	97	510.47	0
	chr12	64216343	64216553	SRGAP1	21989	21.2	56.15	5.27e-76
	chr12	64734323	64734533	C12orf56	49813	6.81	35.73	1.3e-20
	chr12	64846824	64847034	TBK1	984	26.9	23.82	4.59e-70
	chr12	64916079	64916289	TBK1	70239	303	794.8	0
	chr12	65028557	65028767	MIR548C	12268	154.8	135.44	0
	chr12	65101214	65101424	GNS	51803	46.5	244	1.16e-240
	chr12	65377657	65377867	FLJ41278	100103	31.9	41.86	3.4e-101
	chr12	65398140	65398350	WIF1	116997	45.4	119.96	6.65e-198
	chr12	66033495	66033705	LOC100507065	2448	58.2	306.28	2.65e-316
	chr12	66156385	66156595	HMGA2	61646	308.6	24.52	0
	chr12	66408811	66409021	MIR6074	8486	228.8	301.18	0
	chr12	66531984	66532194	LLPH	7451	44	57.68	1.96e-155
	chr12	66803250	66803460	HELB	106915	8.76	22.97	3.42e-22
	chr12	68000842	68001052	DYRK2	41461	9.54	50.03	1.17e-33
	chr12	68435946	68436156	IFNG-AS1	52721	268.9	234.99	0
	chr12	68805209	68805419	LOC100507195	39846	86.4	113.32	0
	chr12	68963999	68964209	RAP1B	40411	16.5	21.69	2.06e-41
	chr12	69175229	69175439	LOC100130075	23836	941.4	38.02	0
	chr12	69181412	69181622	LOC100130075	17653	2509.4	67.92	0
	chr12	69202644	69202854	MDM2	692	18085.2	444.01	0
	chr12	70484879	70485089	CNOT2	151686	177.6	155.86	0
	chr12	70527293	70527503	CNOT2	109272	7.4	38.8	9.51e-24
	chr12	70914686	70914896	PTPRB	116325	61.9	81.16	6.51e-242
	chr12	71186468	71186678	PTPRR	38080	41.7	36.58	3.6e-126
	chr12	72119596	72119806	RAB21	28853	61.1	160.29	7.85e-286
	chr12	72978748	72978958	TRHDE-AS1	311459	36	31.65	3.34e-103
	chr12	73369018	73369228	LOC101928137	183743	26.5	69.42	2.18e-99
	chr12	73953140	73953350	LOC101928137	400170	10.3	27.05	3.5e-29
	chr12	74085374	74085584	LOC101928137	532404	14.8	77.59	4.22e-57
	chr12	75037501	75037711	ATXN7L3B	105950	15	39.31	1.85e-47
	chr12	75571806	75572016	KCNC2	31513	504.9	265.04	0
	chr12	75827285	75827495	GLIPR1L2	42435	83.3	109.24	0
	chr12	75903405	75903615	KRR1	1804	27.8	24.33	1.91e-71
	chr12	76409021	76409231	PHLDA1	16326	188.9	496.18	0
	chr12	76532952	76533162	NAP1L1	54214	92.5	81.16	0
	chr12	76766039	76766249	BBS10	23817	19.7	25.78	2.04e-52
	chr12	76938483	76938693	OSBPL8	14897	85.7	112.3	0
	chr12	77002004	77002214	OSBPL8	48415	36	94.95	3.42e-147
	chr12	77244122	77244332	CSRP2	28468	55.3	72.49	5.51e-208
	chr12	77459742	77459952	E2F7	382	94.4	124.04	0
	chr12	77633404	77633614	E2F7	174044	16.4	42.88	2.68e-52
	chr12	77722185	77722395	E2F7	262825	43.4	57.17	1.12e-153
	chr12	78080625	78080835	NAV3	144235	48.7	42.71	1.56e-156
	chr12	78551105	78551315	NAV3	326036	536.6	281.57	0
	chr12	78888810	78889020	SYT1	550414	22.4	19.57	1.05e-52
	chr12	79139936	79140146	SYT1	299288	258.2	169.22	0
	chr12	80352566	80352776	PPP1R12A	23331	61.5	323.64	0
	chr12	81171925	81172135	LOC101928420	14992	148.4	130	0
	chr12	85132261	85132471	SLC6A15	174138	41.3	108.73	2.8e-175
	chr12	86075081	86075291	RASSF9	155028	6121.3	200.89	0
	chr12	86085986	86086196	RASSF9	144123	767.9	20.77	0
	chr12	87124079	87124289	MGAT4C	108393	91.9	80.65	0
	chr12	87625676	87625886	MGAT4C	392995	9.54	50.03	1.17e-33
	chr12	88953579	88953789	KITLG	20462	345.2	453.3	0
	chr12	89621606	89621816	DUSP6	124821	51.6	33.82	1.33e-151
	chr12	89712972	89713182	DUSP6	33455	21.4	56.15	5.27e-76
	chr12	90628312	90628522	LINC00936	525580	148	64.66	0
	chr12	92296778	92296988	C12orf79	239460	160.2	84.23	0
	chr12	92428747	92428957	C12orf79	107491	149.9	196.53	0
	chr12	92928175	92928385	CLLU1OS	106251	56.5	74.02	1.91e-215
	chr12	92947200	92947410	CLLU1OS	125276	29.8	19.53	1.56e-70
	chr12	92986109	92986319	C12orf74	110301	221.6	290.97	0
	chr12	93015106	93015316	C12orf74	81304	16.9	88.82	1.3e-68
	chr12	93178326	93178536	PLEKHG7	48061	539.7	472.35	0
	chr12	93270760	93270970	EEA1	52138	19.7	25.78	2.04e-52
	chr12	93358445	93358655	EEA1	35338	21.4	56.15	5.27e-76
	chr12	93365187	93365397	EEA1	42080	31.2	81.67	6.42e-122
	chr12	93367502	93367712	EEA1	44395	288.7	252.34	0
	chr12	93627991	93628201	LOC102724933	59849	28.4	37.26	7.94e-87
	chr12	93729780	93729990	LOC643339	41523	14.8	38.8	7.22e-46
	chr12	93845296	93845506	UBE2N	9270	14.2	37.26	2.75e-44
	chr12	94018993	94019203	CRADD	51949	131.6	69.12	0
	chr12	94424134	94424344	PLXNC1	231954	30.4	26.54	2.85e-81
	chr12	94596301	94596511	PLXNC1	59787	12.7	66.36	8.13e-48
	chr12	94815708	94815918	CEP83	37847	15.2	79.63	5.41e-59
	chr12	94867126	94867336	CEP83-AS1	13347	54.5	35.86	6.08e-164
	chr12	94902439	94902649	CEP83-AS1	48660	14	36.75	1.02e-42
	chr12	96115189	96115399	NTN4	69138	53	27.87	1.04e-144
	chr12	96607783	96607993	ELK3	19576	60.4	317.51	0
	chr12	96613608	96613818	ELK3	25401	34.7	90.86	2.5e-139
	chr12	96623112	96623322	ELK3	34905	11.1	59.21	1.28e-40
	chr12	96955599	96955809	CDK17	161233	60	157.22	3.16e-279
	chr12	97146071	97146281	NEDD1	154721	54.3	71.21	2.84e-204
	chr12	98269024	98269234	LOC643711	118729	26.5	138.85	6e-120
	chr12	98739234	98739444	SLC9A7P1	111480	84.7	444.11	0
	chr12	98974311	98974521	SLC25A3	12883	16.2	43.39	6.23e-54
	chr12	98979748	98979958	SLC25A3	7446	49.1	258.3	1.79e-257
	chr12	99890967	99891177	FAM71C	150352	75.4	49.52	1.52e-253
	chr12	100030828	100031038	FAM71C	10491	60.9	53.26	1.25e-208
	chr12	100503297	100503507	UHRF1BP1L	33136	75.7	99.29	2.77e-312
	chr12	102052999	102053209	CHPT1	38209	21.6	28.59	4.98e-61
	chr12	102249181	102249391	DRAM1	21715	134	70.55	0
	chr12	102271223	102271433	DRAM1	118	32.9	28.93	2.29e-91
	chr12	102720229	102720439	PMCH	128615	23.8	31.39	2.05e-68
	chr12	102960169	102960379	IGF1	85791	34.9	91.37	2.75e-141
	chr12	103917628	103917838	LOC101929084	23735	865.5	757.19	0
	chr12	103973857	103974067	STAB2	7003	78.1	68.23	8.2e-289
	chr12	104597449	104597659	NFYB	65409	12.7	66.36	8.13e-48
	chr12	104626771	104626981	TXNRD1	53480	72.4	63.3	1.49e-261
	chr12	104872675	104872885	CHST11	21983	23.9	125.58	4.18e-105
	chr12	104979543	104979753	MIR3922	5659	23.8	62.79	1.19e-86
	chr12	105647718	105647928	APPL2	17710	746.3	49.03	0
	chr12	105667474	105667684	APPL2	37466	19.1	50.03	1.23e-65
	chr12	106349235	106349445	NUAK1	184367	179.1	940.28	0
	chr12	106355680	106355890	NUAK1	177922	25.3	22.12	2.96e-63
	chr12	107774087	107774297	BTBD11	61890	88.2	57.81	1.24e-310
	chr12	107779549	107779759	BTBD11	67352	16.9	22.21	9.37e-43
	chr12	107912908	107913118	PWP1	166473	380.1	45.39	0
	chr12	108747454	108747664	CMKLR1	33015	27.1	35.48	1.37e-80
	chr12	109151690	109151900	CORO1C	54916	12.9	33.69	4.36e-38
	chr12	109276043	109276253	DAO	2186	30	39.31	3.71e-93
	chr12	109301473	109301683	DAO	27616	93.1	61	0
	chr12	109343894	109344104	DAO	70037	194.1	127.23	0
	chr12	109433459	109433669	SVOP	25377	14.6	76.57	4.22e-57
	chr12	109638039	109638249	ACACB	60837	27.6	24.16	1.91e-71
	chr12	110258836	110259046	MIR4497	12108	77.1	101.33	2.74e-320
	chr12	110778702	110778912	ATP2A2	59670	385.7	505.87	0
	chr12	111080601	111080811	TCTN1	28769	34.5	90.35	2.5e-139
	chr12	111572607	111572817	CUX2	100779	99.9	131.19	0
	chr12	112437156	112437366	TMEM116	13658	70.7	92.91	1.63e-286
	chr12	112749189	112749399	HECTD4	70498	46.7	40.84	8.36e-147
	chr12	112927978	112928188	PTPN11	71442	35.2	92.39	2.99e-143
	chr12	113597907	113598117	MIR7106	925	9.15	24.5	6.18e-25
	chr12	114278162	114278372	LINC01234	66674	186.5	489.54	0
	chr12	114707063	114707273	TBX5	136696	142.3	747.33	0
	chr12	114986765	114986975	TBX3	134995	21.2	27.82	3.98e-58
	chr12	115218765	115218975	TBX3	96796	135.7	178.15	0
	chr12	115374253	115374463	TBX3	252284	23.2	30.37	1.94e-65
	chr12	115695693	115695903	TBX3	573724	62.7	32.87	9.04e-182
	chr12	115767876	115768086	TBX3	645907	17.7	23.23	1.81e-45
	chr12	115912978	115913188	MIR620	673272	17.5	91.88	1.44e-70
	chr12	116841673	116841883	MIR4472-2	24241	21	27.57	3.98e-58
	chr12	117691961	117692171	NOS1	50687	34.1	178.66	5.94e-164
	chr12	118294909	118295119	KSR2	110910	96.8	84.91	0
	chr12	119807821	119808031	CCDC60	35304	45	235.84	9.2e-229
	chr12	119825887	119826097	CCDC60	53370	26.1	136.81	8.29e-118
	chr12	120275485	120275695	CIT	39401	10.1	26.54	9.47e-28
	chr12	120884032	120884242	TRIAP1	0	260.9	228.52	0
	chr12	120884032	120884242	GATC	0	260.9	228.52	0
	chr12	121414270	121414480	HNF1A	2070	9.74	25.52	2.47e-26
	chr12	122335894	122336104	PSMD9	9257	28.4	149.06	9.71e-131
	chr12	122353696	122353906	WDR66	2558	15.8	41.35	1.13e-50
	chr12	122479741	122479951	BCL7A	19880	33.3	43.65	1.02e-107
	chr12	122581360	122581570	MLXIP	64726	50.8	66.62	1.01e-187
	chr12	123431396	123431606	ABCB9	19451	439.8	192.53	0
	chr12	123453203	123453413	ABCB9	2147	34.9	45.69	2.53e-114
	chr12	123723585	123723795	C12orf65	5294	14.8	19.4	7.5e-35
	chr12	123997771	123997981	RILPL1	20285	16.4	43.39	6.23e-54
	chr12	124052130	124052340	LOC101927415	16535	89.6	117.41	0
	chr12	124610078	124610288	ZNF664	152316	43.8	38.29	4.95e-134
	chr12	124610078	124610288	ZNF664-FAM101A	152316	43.8	38.29	4.95e-134
	chr12	124758251	124758461	FAM101A	15250	180.3	158.08	0
	chr12	124846200	124846410	MIR6880	24412	21	27.57	3.98e-58
	chr12	125073655	125073865	NCOR2	21645	81.6	42.88	1.21e-260
	chr12	125174120	125174330	NCOR2	122110	28.2	24.67	3.18e-74
	chr12	125423176	125423386	MIR5188	23083	799.8	299.86	0
	chr12	127380809	127381019	LOC440117	21573	45.8	39.99	5.49e-142
	chr12	127592313	127592523	LOC101927592	47371	16.7	43.9	6.23e-54
	chr12	128020548	128020758	LOC101927637	100255	38.2	33.35	2.83e-112
	chr12	131767486	131767696	LOC338797	64320	7.4	38.8	9.51e-24
	chr12	132205476	132205686	SFSWAP	9844	222.9	585	0
	chr12	132527896	132528106	SNORA49	12127	22.8	29.86	5.82e-64
	chr12	133122576	133122786	MIR6763	35798	35.6	187.85	5.29e-173
	chr13	20266365	20266575	MPHOSPH8	58577	77.9	41.04	4.94e-246
	chr13	20456395	20456605	ZMYM5	18619	10.9	28.59	1.25e-30
	chr13	20565815	20566025	ZMYM2	33005	59.6	39.18	2.1e-184
	chr13	21112695	21112905	CRYL1	12683	14.8	77.59	4.22e-57
	chr13	21525841	21526051	LINC00367	2274	36.8	96.48	3.75e-151
	chr13	21807375	21807585	SKA3	56634	458.5	401.57	0
	chr13	22212898	22213108	FGF9	32108	35.4	30.97	3.25e-100
	chr13	23899520	23899730	SACS	49953	56.1	73.76	1.42e-213
	chr13	23967183	23967393	SACS	17501	18.5	96.99	1.74e-76
	chr13	23973504	23973714	SACS-AS1	19397	267.1	350.95	0
	chr13	24362993	24363203	C1QTNF9B-AS1	99826	238.3	625.32	0
	chr13	24927936	24928146	C1QTNF9	44220	7.01	36.75	3.61e-22
	chr13	25122349	25122559	TPTE2P6	31788	102.8	90.18	0
	chr13	25196350	25196560	TPTE2P6	42004	22.6	59.21	2.7e-81
	chr13	25223737	25223947	ATP12A	30603	63.7	55.64	8.97e-221
	chr13	25425796	25426006	CENPJ	71022	54.7	71.72	3.97e-206
	chr13	25449193	25449403	CENPJ	47625	121.5	79.63	0
	chr13	25796421	25796631	LOC102723318	40951	74	48.62	8.87e-247
	chr13	26062489	26062699	ATP8A2	116280	17.1	44.92	1.42e-55
	chr13	27381134	27381344	GPR12	46212	37	32.5	1.02e-107
	chr13	27488996	27489206	GPR12	154074	330.2	433.9	0
	chr13	27909654	27909864	RASL11A	65190	106.5	93.59	0
	chr13	30619106	30619316	LINC00544	108438	10.3	27.57	3.5e-29
	chr13	31592696	31592906	TEX26	85862	15.4	20.16	1.92e-37
	chr13	31845154	31845364	B3GALTL	71042	77.1	101.07	2.74e-320
	chr13	31976359	31976569	B3GALTL	202247	22.8	29.86	5.82e-64
	chr13	32739933	32740143	FRY-AS1	134157	162	141.74	0
	chr13	32763342	32763552	ZAR1L	122540	11.9	31.14	4.62e-35
	chr13	34433811	34434021	RFC3	41605	34.7	90.86	2.5e-139
	chr13	34515086	34515296	RFC3	122880	190	99.64	0
	chr13	34767962	34768172	RFC3	375756	57.6	37.77	1.78e-176
	chr13	36698418	36698628	SOHLH2	90125	10.1	53.09	2.24e-35
	chr13	37376644	37376854	RFXAP	16486	54.3	284.84	4.04e-289
	chr13	38084678	38084888	LINC00547	24190	12.3	32.16	1.44e-36
	chr13	38489183	38489393	TRPC4	45244	52.8	138.34	5.36e-238
	chr13	38920945	38921155	UFM1	2754	21.8	57.17	9.24e-78
	chr13	38960777	38960987	UFM1	36869	59.8	39.18	2.1e-184
	chr13	39092551	39092761	LINC00366	49101	22.4	59.21	2.7e-81
	chr13	40807866	40808076	LINC00548	13227	61.7	80.91	5.28e-240
	chr13	40907457	40907667	LINC00548	112818	158.7	417.05	0
	chr13	40959715	40959925	LINC00598	95219	123.2	80.78	0
	chr13	40962710	40962920	LINC00598	92224	137.1	180.2	0
	chr13	41719711	41719921	LOC101929140	12647	56.9	149.57	9.72e-262
	chr13	41976744	41976954	OR7E37P	39747	112	98.01	0
	chr13	42377243	42377453	VWA8	157769	172.9	90.86	0
	chr13	43577237	43577447	EPSTI1	10830	86.1	25.07	5.17e-223
	chr13	44671020	44671230	SMIM2-AS1	13456	51.8	135.78	1.38e-231
	chr13	45413093	45413303	LINC00330	29327	15.4	20.16	1.92e-37
	chr13	45710953	45711163	GTF2F2	16322	42.8	224.61	5.92e-217
	chr13	46086519	46086729	COG3	47489	26.1	68.4	1.51e-97
	chr13	46327889	46328099	SPERT	51285	27.3	23.82	4.59e-70
	chr13	46347439	46347649	SPERT	70835	337.6	177.13	0
	chr13	46386918	46387128	SIAH3	38719	32.5	170.5	5.57e-155
	chr13	46988659	46988869	KIAA0226L	24482	7.2	19.4	3.18e-18
	chr13	47189813	47190023	LRCH1	62517	56.1	147.01	2.14e-257
	chr13	48053679	48053889	SUCLA2	521574	46.5	40.84	8.36e-147
	chr13	48205900	48206110	SUCLA2	369353	33.5	88.31	2.01e-135
	chr13	48640775	48640985	MED4-AS1	10289	416.9	274.25	0
	chr13	48646491	48646701	MED4-AS1	4573	167.6	220.01	0
	chr13	50161373	50161583	RCBTB1	1654	143.1	187.85	0
	chr13	50787804	50788014	ST13P4	41650	82.2	215.93	0
	chr13	50997978	50998188	ST13P4	251824	58.2	76.32	5.97e-223
	chr13	51033673	51033883	ST13P4	287519	57.8	76.32	5.97e-223
	chr13	51103557	51103767	DLEU7-AS1	278225	617	810.37	0
	chr13	51305653	51305863	DLEU7-AS1	76129	272.6	143.03	0
	chr13	52171041	52171251	WDFY2	12557	98.1	128.64	0
	chr13	52600796	52601006	UTP14C	1969	36.6	95.97	3.6e-149
	chr13	52609058	52609268	UTP14C	10231	15.8	20.67	9.34e-39
	chr13	52785531	52785741	MRPS31P5	16929	8.37	43.9	5.66e-27
	chr13	53168944	53169154	HNRNPA1L2	22452	30.2	79.12	4.16e-118
	chr13	55893002	55893212	MIR5007	144413	15	78.61	5.41e-59
	chr13	59564572	59564782	LOC101926897	824611	107.1	563.56	0
	chr13	60505803	60506013	DIAPH3-AS1	81425	28.6	37.52	2.12e-88
	chr13	67427849	67428059	PCDH9-AS2	28548	15.2	20.16	1.92e-37
	chr13	67566724	67566934	PCDH9-AS4	1706	14.8	77.59	4.22e-57
	chr13	67951734	67951944	PCDH9	147266	31	81.16	6.42e-122
	chr13	68365288	68365498	PCDH9	560820	11.3	59.21	1.28e-40
	chr13	69684021	69684231	LINC00550	224564	8.37	21.95	7.54e-21
	chr13	72058334	72058544	DACH1	382787	16.2	42.37	2.68e-52
	chr13	72671793	72672003	DACH1	230463	243.8	640.13	0
	chr13	73164343	73164553	BORA	137335	13	68.4	1.2e-49
	chr13	73328315	73328525	MZT1	26377	36.6	23.99	2.9e-93
	chr13	73608005	73608215	KLF5	24716	20.1	52.58	4.65e-69
	chr13	74003930	74004140	LINC00392	134242	24.3	31.9	6.5e-70
	chr13	74087979	74088189	LINC00392	50193	249.8	163.73	0
	chr13	74177883	74178093	LINC00392	39502	80.2	70.1	7.49e-300
	chr13	74732131	74732341	KLF12	24065	265.8	174.84	0
	chr13	75789123	75789333	CTAGE11P	25185	36	31.48	3.34e-103
	chr13	76146022	76146232	UCHL3	22406	104.8	137.32	0
	chr13	76180912	76181122	LMO7	13449	14.8	19.4	7.5e-35
	chr13	76738701	76738911	LMO7DN	293527	29.8	26.03	7.51e-80
	chr13	77096257	77096467	KCTD12	364074	174.7	114.73	0
	chr13	78136190	78136400	SCEL	26381	23.4	122.51	5.18e-103
	chr13	79084317	79084527	POU4F1	93169	11.9	31.65	4.62e-35
	chr13	80179123	80179333	NDFIP2-AS1	123757	36	47.22	2.52e-119
	chr13	80214884	80215094	NDFIP2-AS1	159518	60.7	39.94	3.4e-189
	chr13	80366934	80367144	LINC00382	79578	60.4	52.75	6.65e-207
	chr13	80847617	80847827	SPRY2	67260	72.2	94.95	2.11e-294
	chr13	81673903	81674113	SPRY2	758817	136.9	32.72	0
	chr13	84515899	84516109	SLITRK1	59371	100.9	530.89	0
	chr13	85682590	85682800	LINC00351	254939	110	58.19	0
	chr13	86439406	86439616	SLITRK6	65923	82.4	30.85	1.01e-231
	chr13	91003241	91003451	MIR622	119805	46.1	40.33	1.37e-143
	chr13	91244242	91244452	LINC01049	98700	56.1	147.01	2.14e-257
	chr13	93869925	93870135	GPC6	8944	1640.8	253.37	0
	chr13	94997682	94997892	DCT	134045	541.3	473.37	0
	chr13	95414237	95414447	LOC101927284	1042	34.5	30.12	3.02e-97
	chr13	95585581	95585791	LOC101927284	172386	33.9	177.64	1.06e-161
	chr13	96138209	96138419	CLDN10-AS1	47746	24.1	63.81	1.88e-88
	chr13	96165320	96165530	CLDN10-AS1	20635	23.4	30.63	6.35e-67
	chr13	96400826	96401036	DNAJC3	71433	29.6	155.18	2.76e-137
	chr13	96812054	96812264	HS6ST3	68961	170.4	56.09	0
	chr13	98361410	98361620	IPO5	244310	52.8	34.71	3.31e-156
	chr13	98842994	98843204	RNF113B	13473	31.2	40.84	5.79e-98
	chr13	99311956	99312166	SLC15A1	92764	289.1	69.05	0
	chr13	99331414	99331624	SLC15A1	73306	120.7	31.65	0
	chr13	99486901	99487111	DOCK9-AS1	2563	782.7	136.91	0
	chr13	99878711	99878921	UBAC2-AS1	25702	201.1	31.11	0
	chr13	100450473	100450683	CLYBL-AS1	69218	100.9	24.13	3.37e-258
	chr13	100702715	100702925	PCCA	38345	345.2	100.9	0
	chr13	100737158	100737368	PCCA	3902	97	21.18	6.35e-234
	chr13	100911190	100911400	PCCA	169921	363.3	56.12	0
	chr13	101451339	101451549	NALCN-AS1	90760	26.1	34.46	1.66e-77
	chr13	101599183	101599393	LINC00411	2565	11.1	29.1	4.3e-32
	chr13	102682572	102682782	MIR4705	15573	19.9	26.03	7.85e-54
	chr13	103339984	103340194	METTL21C	6678	134.5	176.62	0
	chr13	104200369	104200579	MIR548AS	265521	468.5	175.82	0
	chr13	104355130	104355340	MIR548AS	420282	99.3	29.1	1.46e-274
	chr13	104657027	104657237	MIR548AS	722179	161.2	26.45	0
	chr13	107374002	107374212	LINC00443	67774	22	28.84	4.98e-61
	chr13	107928654	107928864	FAM155A-IT1	558943	224.7	98.18	0
	chr13	108347186	108347396	FAM155A-IT1	140411	64.3	168.45	1.46e-303
	chr13	108429070	108429280	FAM155A-IT1	58527	21.2	27.82	3.98e-58
	chr13	109086377	109086587	TNFSF13B	164400	23.2	60.75	4.49e-83
	chr13	109406395	109406605	MYO16	124824	66	24.72	4.1e-171
	chr13	109624981	109625191	MYO16-AS1	194461	152.8	67.04	0
	chr13	109898446	109898656	MYO16-AS1	78795	269.5	35.45	0
	chr13	110390687	110390897	LINC00676	10066	190.6	100.15	0
	chr13	110775316	110775526	COL4A1	183971	415.3	363.28	0
	chr13	111462960	111463170	LINC00346	59486	61.1	32.06	1.01e-175
	chr13	111604705	111604915	ANKRD10	37251	98.9	87.12	0
	chr13	111661781	111661991	LINC00368	86195	117.4	51.39	0
	chr13	112592434	112592644	LINC00403	33981	92.1	48.29	1.99e-305
	chr13	112766303	112766513	SOX1	44390	143.3	75.24	0
	chr13	112844327	112844537	LINC01070	7111	301.2	395.61	0
	chr13	113052605	113052815	SPACA7	21954	19.5	51.05	2.42e-67
	chr13	113331396	113331606	ATP11A	13038	7.79	40.84	2.38e-25
	chr13	113959549	113959759	LAMP1	8080	33.5	21.95	2.18e-82
	chr13	114540299	114540509	GAS6-AS1	21716	492.4	1293.53	0
	chr13	114907130	114907340	RASA3	9035	24.5	64.83	2.94e-90
	chr13	114969148	114969358	CDC16	31005	23.2	30.37	1.94e-65
	chr13	115109604	115109814	CHAMP1	29639	396	519.15	0
	chr14	21220185	21220395	EDDM3A	6086	1043.2	685.56	0
	chr14	21441443	21441653	METTL17	16313	55.1	290.97	1.69e-296
	chr14	21510235	21510445	RNASE7	0	30	19.65	1.56e-70
	chr14	21565434	21565644	TMEM253	1453	24.3	63.81	1.88e-88
	chr14	21600105	21600315	OR5AU1	23870	9.54	25.01	2.47e-26
	chr14	23005985	23006195	DAD1	51949	257.4	225.29	0
	chr14	23308479	23308689	MMP14	2737	29.6	25.86	1.95e-78
	chr14	24101123	24101333	DHRS2	4241	186.9	245.54	0
	chr14	24139807	24140017	DHRS2	34234	419.6	367.54	0
	chr14	24193197	24193407	DHRS2	87624	50.4	33.05	5.01e-147
	chr14	26529235	26529445	NOVA1	537516	17.3	45.43	3.14e-57
	chr14	26927116	26927326	NOVA1	139635	66.2	43.39	7.28e-212
	chr14	28854363	28854573	FOXG1	381706	24.1	21.27	3.02e-59
	chr14	29266064	29266274	C14orf23	24154	12.9	33.69	4.36e-38
	chr14	30722258	30722468	G2E3	305862	51.6	270.55	5.18e-272
	chr14	31931680	31931890	DTD2	5000	92.7	121.49	0
	chr14	32490197	32490407	ARHGAP5-AS1	55499	105.5	554.37	0
	chr14	32555287	32555497	ARHGAP5	8792	68	29.69	1.33e-189
	chr14	32814609	32814819	AKAP6	16130	528	346.35	0
	chr14	32818620	32818830	AKAP6	20141	76.5	66.87	1.7e-281
	chr14	33029401	33029611	AKAP6	230922	77.9	204.19	0
	chr14	33347590	33347800	NPAS3	60660	8.96	23.48	1.48e-23
	chr14	33815503	33815713	NPAS3	407044	11.1	29.1	4.3e-32
	chr14	34767043	34767253	SPTSSA	164216	623.3	409.65	0
	chr14	34890084	34890294	SPTSSA	41175	13.8	36.24	1.02e-42
	chr14	35155762	35155972	CFL2	28058	17.9	46.96	6.83e-59
	chr14	35214500	35214710	CFL2	30471	22.4	19.57	1.05e-52
	chr14	35310636	35310846	BAZ1A	34008	36.2	47.73	5.3e-121
	chr14	35683639	35683849	PSMA6	63916	91.1	79.63	0
	chr14	35863139	35863349	NFKBIA	10612	26.5	34.71	4.81e-79
	chr14	35964461	35964671	INSM2	38578	54.1	142.42	1.37e-246
	chr14	36179514	36179724	RALGAPA1P	98627	23.4	61.26	7.37e-85
	chr14	37290198	37290408	MIR4503	131189	151.1	99.16	0
	chr14	37414069	37414279	MIR4503	7318	73.8	96.73	2.51e-302
	chr14	37917455	37917665	FOXA1	146661	41.9	27.44	5.55e-113
	chr14	37950110	37950320	FOXA1	114006	66.6	87.29	5.1e-265
	chr14	38086113	38086323	FOXA1	21788	24.7	129.66	2.59e-109
	chr14	39493027	39493237	SEC23A	79201	82.4	72.15	5.76e-311
	chr14	39547200	39547410	SEC23A	25028	17.5	45.94	3.14e-57
	chr14	41607049	41607259	LOC644919	183133	17.5	91.88	1.44e-70
	chr14	44577840	44578050	FSCB	398450	18.3	95.97	1.67e-74
	chr14	45550642	45550852	PRPF39	2451	8.57	44.92	1.29e-28
	chr14	46254624	46254834	MIS18BP1	532019	34.9	183.77	1.81e-168
	chr14	46262375	46262585	MIS18BP1	539770	22.2	19.4	1.05e-52
	chr14	46666989	46667199	LINC00871	273364	37.4	32.84	3.12e-109
	chr14	50653781	50653991	SOS2	44109	11.3	29.61	4.3e-32
	chr14	50865933	50866143	CDKL1	1811	29	25.35	5.01e-77
	chr14	51067012	51067222	ATL1	40269	302.4	132.47	0
	chr14	51288410	51288620	NIN	9220	43.6	38.11	4.95e-134
	chr14	51590240	51590450	TRIM9	27818	153.2	403.27	0
	chr14	51804202	51804412	LINC00640	4091	17.1	44.92	1.42e-55
	chr14	51824077	51824287	LINC00640	23966	90.3	473.71	0
	chr14	51834323	51834533	LINC00640	34212	39.9	20.93	3.39e-96
	chr14	51862116	51862326	LINC00640	62005	72.2	63.47	2.35e-263
	chr14	52011734	52011944	FRMD6-AS2	54727	70.1	30.71	1.74e-198
	chr14	52236074	52236284	FRMD6	52073	68.9	90.35	1.04e-276
	chr14	53068670	53068880	GPR137C	48804	21.4	57.17	9.24e-78
	chr14	53879591	53879801	LOC101927620	259519	28	73.51	8.34e-107
	chr14	53958369	53958579	LOC101927620	338297	68.5	30.2	4.94e-194
	chr14	54021371	54021581	MIR5580	393622	80.6	106.18	0
	chr14	54084353	54084563	MIR5580	330640	18.7	98.01	1.77e-78
	chr14	55679475	55679685	DLGAP5	21079	22	57.68	9.24e-78
	chr14	55949992	55950202	TBPL2	42729	85.7	224.61	0
	chr14	57133086	57133296	TMEM260	86575	276.1	241.28	0
	chr14	57743057	57743267	EXOC5	7440	60.2	31.65	1.03e-172
	chr14	58532849	58533059	C14orf37	85789	14.6	76.57	4.22e-57
	chr14	58876836	58877046	TOMM20L	14192	36.2	189.89	2.82e-175
	chr14	59271240	59271450	LOC102723742	23557	26.1	34.2	1.66e-77
	chr14	60154413	60154623	CCDC175	110864	61.5	53.94	4.38e-212
	chr14	60646212	60646422	DHRS7	14001	68.7	60.07	1.92e-245
	chr14	61345937	61346147	TRMT5	101651	70.1	46.07	5.05e-230
	chr14	61592548	61592758	SLC38A6	144716	77.1	406.33	0
	chr14	62053933	62054143	FLJ22447	16675	79.4	41.65	6.96e-251
	chr14	62431808	62432018	SYT16	30524	138.4	60.49	0
	chr14	63201627	63201837	KCNH5	310120	30.2	39.82	9.38e-95
	chr14	64240334	64240544	SGPP1	45578	466.5	408.2	0
	chr14	64527290	64527500	SYNE2	153360	64.4	33.79	7.35e-188
	chr14	65147067	65147277	PLEKHG3	23917	26.9	70.44	3.12e-101
	chr14	65472266	65472476	FNTB	18759	128.9	112.81	0
	chr14	65646476	65646686	LOC100128233	42380	27.6	36.24	1.07e-83
	chr14	66571271	66571481	LINC00238	381609	106.5	280.76	0
	chr14	66970308	66970518	GPHN	3608	138.6	121.15	0
	chr14	67399426	67399636	FAM71D	256475	610.2	320.27	0
	chr14	67944800	67945010	TMEM229B	37012	37.4	196.02	2.03e-184
	chr14	68571445	68571655	RAD51B	284949	47.9	25.22	3.48e-126
	chr14	69144272	69144482	ZFP36L1	118479	8.18	42.88	5.66e-27
	chr14	69425400	69425610	ACTN1	20474	27.8	36.5	1.07e-83
	chr14	69454999	69455209	ACTN1-AS1	8600	347	456.36	0
	chr14	69535157	69535367	DCAF5	84548	25.1	21.95	6.51e-62
	chr14	69818233	69818443	ERH	46579	13.2	69.42	1.2e-49
	chr14	69894424	69894634	SLC39A9	29328	63.9	83.72	1.7e-251
	chr14	70079612	70079822	KIAA0247	1302	27.8	24.33	1.91e-71
	chr14	70179916	70180126	SRSF5	53709	244.7	641.66	0
	chr14	70466113	70466323	SMOC1	119999	31.9	27.91	5.22e-87
	chr14	70477906	70478116	SMOC1	131792	261.9	229.37	0
	chr14	70914021	70914231	ADAM21	4644	38.7	203.17	2.54e-191
	chr14	71132976	71133186	TTC9	24472	16.7	43.9	6.23e-54
	chr14	71331843	71332053	PCNX	42070	184.4	161.99	0
	chr14	71339284	71339494	PCNX	34629	57.8	50.54	6.53e-195
	chr14	71375944	71376154	PCNX	1822	28.2	74.02	1.13e-108
	chr14	71543286	71543496	PCNX	169164	137.1	72.18	0
	chr14	72030713	72030923	SIPA1L1	22076	80.2	105.16	0
	chr14	72142776	72142986	SIPA1L1	89778	22.2	58.19	1.59e-79
	chr14	72240778	72240988	RGS6	158799	153.8	406.84	0
	chr14	72252935	72253145	RGS6	146642	59.6	156.2	4.96e-277
	chr14	74339762	74339972	ZNF410	13347	46.1	121.49	4.58e-202
	chr14	74471719	74471929	ENTPD5	14098	29	25.35	5.01e-77
	chr14	75378242	75378452	RPS6KL1	10694	19.3	101.07	1.77e-80
	chr14	75419798	75420008	PGF	2460	100.5	528.85	0
	chr14	75688571	75688781	TMED10	45222	58.4	51.05	2.53e-198
	chr14	76860188	76860398	ESRRB	22498	93.5	245.02	0
	chr14	77248049	77248259	LOC100506603	4809	7.79	40.84	2.38e-25
	chr14	77404561	77404771	IRF2BPL	90272	82.2	108.22	0
	chr14	77425709	77425919	IRF2BPL	69124	59	38.67	3.17e-181
	chr14	78601814	78602024	ADCK1	335388	40.3	106.18	3.24e-171
	chr14	78909609	78909819	ADCK1	643183	13.6	35.73	3.66e-41
	chr14	79334924	79335134	NRXN3	410549	15	78.61	5.41e-59
	chr14	79358249	79358459	NRXN3	387224	26.5	23.14	2.54e-67
	chr14	79507110	79507320	NRXN3	238363	49.8	131.7	4.38e-223
	chr14	79626058	79626268	NRXN3	119415	315.4	415.01	0
	chr14	80178694	80178904	NRXN3	433012	51.4	33.82	1.33e-151
	chr14	81765395	81765605	GTF2A1	77820	32.3	28.25	1.86e-88
	chr14	85906442	85906652	LINC00911	46183	104.8	274.63	0
	chr14	87680803	87681013	LOC283585	308681	28.4	149.06	9.71e-131
	chr14	89083536	89083746	ZC3H14	53845	18.3	96.99	1.74e-76
	chr14	89608251	89608461	FOXN3	274994	60.2	79.12	2.7e-234
	chr14	89692613	89692823	FOXN3	190632	16.4	21.44	4.44e-40
	chr14	89806565	89806775	FOXN3	76680	30.2	19.78	7.87e-72
	chr14	89895239	89895449	FOXN3-AS1	11541	538.2	707	0
	chr14	89976198	89976408	FOXN3-AS2	66153	42.8	22.46	6.88e-107
	chr14	90776896	90777106	NRDE2	21376	52	137.32	7.39e-236
	chr14	90867684	90867894	CALM1	4357	55.1	48.15	4.65e-183
	chr14	91100247	91100457	LOC101928909	8517	20.8	54.62	1.62e-72
	chr14	91337410	91337620	TTC7B	54649	103.4	135.78	0
	chr14	91350143	91350353	TTC7B	67382	48.7	256.26	4.62e-255
	chr14	91975769	91975979	SMEK1	846	181.9	476.78	0
	chr14	92569808	92570018	ATXN3	2948	82	71.64	2.97e-307
	chr14	93064935	93065145	RIN3	84810	154.6	202.91	0
	chr14	93102905	93103115	LGMN	111933	30.4	39.82	9.38e-95
	chr14	94612297	94612507	IFI27L2	16340	19.1	50.54	1.23e-65
	chr14	94786658	94786868	SERPINA6	2821	33.7	29.61	2.69e-94
	chr14	94801298	94801508	SERPINA6	11610	57.6	151.1	4.29e-266
	chr14	94826392	94826602	SERPINA2	6438	23.6	30.88	6.35e-67
	chr14	96392123	96392333	TUNAR	49014	6.81	35.73	1.3e-20
	chr14	96668053	96668263	BDKRB2	2873	21	27.57	3.98e-58
	chr14	96946763	96946973	PAPOLA	21741	108.8	142.93	0
	chr14	97287908	97288118	VRK1	24224	37.8	49.52	9.38e-128
	chr14	97782133	97782343	LOC101929241	142811	42.6	37.43	7.09e-131
	chr14	97798394	97798604	LOC101929241	126550	51.2	269.53	1.4e-269
	chr14	98543599	98543809	C14orf64	99138	26.5	69.42	2.18e-99
	chr14	98700187	98700397	C14orf64	255726	21.2	55.64	2.95e-74
	chr14	99380219	99380429	C14orf177	202269	20.8	54.62	1.62e-72
	chr14	99950576	99950786	CCNK	2837	86.1	75.38	0
	chr14	99985317	99985527	CCNK	37578	67	58.7	2.41e-238
	chr14	100573723	100573933	EVL	41972	38.4	101.07	3.94e-161
	chr14	100613256	100613466	DEGS2	12547	6.43	33.69	4.42e-19
	chr14	100665638	100665848	YY1	39255	11.1	29.1	4.3e-32
	chr14	100786865	100787075	SLC25A47	2605	22	115.37	1.04e-94
	chr14	100864487	100864697	WDR25	21654	110.4	580.91	0
	chr14	101088659	101088869	LINC00523	34737	9.74	25.52	2.47e-26
	chr14	101097680	101097890	LINC00523	25716	26.3	22.97	5.84e-66
	chr14	101159690	101159900	DLK1	33303	29.2	25.69	1.95e-78
	chr14	102657092	102657302	MOK	49657	102.8	540.08	0
	chr14	103304568	103304778	TRAF3	60752	23	30.12	1.94e-65
	chr14	103453676	103453886	AMN	64683	356.1	234.05	0
	chr14	103710470	103710680	LINC00605	55105	806.5	529.1	0
	chr14	103824326	103824536	SNORA28	20140	94.2	61.89	0
	chr14	105530722	105530932	GPR132	956	11.5	30.12	1.43e-33
	chr14	105581346	105581556	LOC102723354	20862	11.1	29.1	4.3e-32
	chr14	105820676	105820886	PACS2	39924	43.4	113.83	1.66e-185
	chr14	105941735	105941945	CRIP2	2460	6.04	31.65	1.42e-17
	chr14	106034558	106034768	TMEM121	41605	10.9	28.59	1.25e-30
	chr15	20994220	20994430	NBEAP1	32740	8.76	23.48	1.48e-23
	chr15	21892569	21892779	LOC646214	47961	32.3	28.25	1.86e-88
	chr15	21926070	21926280	LOC646214	14460	108.8	142.68	0
	chr15	22921327	22921537	CYFIP1	34219	17.5	45.94	3.14e-57
	chr15	23051525	23051735	NIPA2	17098	27.8	145.99	2.1e-126
	chr15	25103960	25104170	SNURF	95901	59.2	77.59	1.31e-228
	chr15	26367994	26368204	LINC00929	7034	17.3	22.72	4.16e-44
	chr15	27939854	27940064	OCA2	404395	15	40.33	4.62e-49
	chr15	29983297	29983507	FAM189A1	120370	227.6	298.62	0
	chr15	30038610	30038820	TJP1	75887	171	49.86	0
	chr15	31254226	31254436	MTMR10	29372	28	24.5	7.85e-73
	chr15	31442961	31443171	TRPM1	49032	58.4	153.14	1.85e-270
	chr15	31676815	31677025	KLF13	57732	36	31.48	3.34e-103
	chr15	31749422	31749632	KLF13	130339	23.6	30.88	6.35e-67
	chr15	31791202	31791412	OTUD7A	156131	16.4	85.76	9.82e-65
	chr15	32122275	32122485	OTUD7A	174733	8.18	21.44	7.54e-21
	chr15	33406363	33406573	FMN1	46130	70.7	23.23	1e-177
	chr15	33437840	33438050	FMN1	77607	241.4	211.33	0
	chr15	33779545	33779755	RYR3	176368	65.8	57.51	2.76e-231
	chr15	35024716	35024926	GJD2	21857	145.1	380.3	0
	chr15	35548785	35548995	ANP32AP1	19258	128.3	112.47	0
	chr15	35727549	35727759	MIR3942	62984	51.2	67.13	1.5e-189
	chr15	35732796	35733006	MIR3942	68231	22.4	59.72	2.7e-81
	chr15	35800543	35800753	DPH6-AS1	37644	235	123.43	0
	chr15	36160954	36161164	MIR4510	57894	64.1	41.99	4.37e-202
	chr15	36423195	36423405	MIR4510	204138	59.4	25.95	2.21e-156
	chr15	36761197	36761407	C15orf41	110398	34.5	45.43	1.15e-112
	chr15	36807750	36807960	C15orf41	63845	47.7	31.39	1.82e-136
	chr15	39006951	39007161	C15orf53	18152	21.8	57.17	9.24e-78
	chr15	39041000	39041210	C15orf53	52201	37.4	98.52	3.94e-155
	chr15	39788147	39788357	THBS1	84924	40.1	26.54	1.09e-108
	chr15	39848766	39848976	THBS1	24305	26.9	70.44	3.12e-101
	chr15	40134981	40135191	FSIP1	59942	52	136.3	1.01e-233
	chr15	40294688	40294898	SRP14	36492	125.2	82.06	0
	chr15	40535474	40535684	C15orf56	9427	18.3	23.99	7.68e-47
	chr15	40614547	40614757	PLCB2	14373	72.4	63.47	2.35e-263
	chr15	40620394	40620604	C15orf52	12565	109.2	28.69	5.4e-299
	chr15	40804699	40804909	MRPL42P5	19841	20.4	26.8	2.96e-55
	chr15	40958621	40958831	RAD51-AS1	28473	17.9	23.48	1.81e-45
	chr15	41329470	41329680	INO80	78765	68.7	36.04	2.25e-206
	chr15	41499966	41500176	EXD1	22780	31.2	40.84	5.79e-98
	chr15	41703573	41703783	RTF1	5520	27.5	24.16	1.91e-71
	chr15	42083195	42083405	MAPKBP1	16563	27.3	35.73	3.86e-82
	chr15	42323540	42323750	PLA2G4E	19152	27.6	24.16	1.91e-71
	chr15	42630141	42630351	CAPN3	21348	9.54	50.03	1.17e-33
	chr15	42879623	42879833	STARD9	11766	23	30.12	1.94e-65
	chr15	42935047	42935257	STARD9	67190	17.5	22.97	4.16e-44
	chr15	42963752	42963962	CDAN1	65456	242.6	318.02	0
	chr15	44205678	44205888	PIN4P1	35309	18.9	24.76	1.3e-49
	chr15	44937900	44938110	SPG11	17767	184.8	81.08	0
	chr15	45174756	45174966	C15orf43	73935	32.3	42.37	8.09e-103
	chr15	45375528	45375738	DUOX2	30622	14.8	38.8	7.22e-46
	chr15	45399790	45400000	DUOX2	6360	71.1	372.64	0
	chr15	45489963	45490173	SHF	3201	87.2	114.34	0
	chr15	46361814	46362024	SQRDL	434876	54.5	142.93	1.37e-246
	chr15	47901474	47901684	SEMA6D	109003	21.8	28.59	4.98e-61
	chr15	48093795	48094005	LOC101928442	44429	10.5	55.13	4.15e-37
	chr15	48310134	48310344	SLC24A5	102826	42.3	36.92	9.8e-128
	chr15	48325241	48325451	SLC24A5	87719	38.6	33.69	8.41e-114
	chr15	48976605	48976815	FBN1	38620	17.5	45.94	3.14e-57
	chr15	49052114	49052324	CEP152	51020	64.4	337.93	0
	chr15	49160237	49160447	EID1	9844	79.1	51.94	6.82e-269
	chr15	49558258	49558468	MIR4716	96908	75.9	200.1	0
	chr15	49798658	49798868	FGF7	83283	83.5	109.5	0
	chr15	49917939	49918149	DTWD1	4713	435	190.4	0
	chr15	49981727	49981937	DTWD1	68501	45.4	59.47	9.76e-161
	chr15	51372565	51372775	TNFAIP8L3	24699	75.9	398.17	0
	chr15	51608313	51608523	CYP19A1	22273	28.8	37.77	2.12e-88
	chr15	52031312	52031522	LYSMD2	992	41.3	108.22	2.8e-175
	chr15	52156767	52156977	TMOD3	34942	227.4	99.37	0
	chr15	52359893	52360103	BCL2L10	44870	53.7	70.44	1.42e-200
	chr15	52369263	52369473	BCL2L10	35500	54.5	289.95	4.9e-294
	chr15	52388035	52388245	BCL2L10	16728	24.5	64.32	2.94e-90
	chr15	52489220	52489430	LOC100129973	16997	12.9	34.2	1.28e-39
	chr15	52627105	52627315	MYO5C	39110	102	44.67	0
	chr15	52632907	52633117	MYO5C	44912	70.3	30.8	1.74e-198
	chr15	52850398	52850608	ARPP19	10606	206.6	90.27	0
	chr15	52955872	52956082	FAM214A	14750	159.3	139.7	0
	chr15	53256388	53256598	ONECUT1	174179	11.3	29.61	4.3e-32
	chr15	53504239	53504449	WDR72	328601	34.7	30.29	3.02e-97
	chr15	55522948	55523158	RSL24D1	33717	42.4	55.64	2.03e-148
	chr15	56245825	56246035	NEDD4	36496	6.62	34.71	1.3e-20
	chr15	56497422	56497632	RFX7	37852	205	179.34	0
	chr15	56532690	56532900	RFX7	2584	193.3	507.92	0
	chr15	56661573	56661783	TEX9	3951	140.2	368.56	0
	chr15	56922655	56922865	ZNF280D	103420	137.9	72.28	0
	chr15	57116559	57116769	ZNF280D	90275	23.6	30.88	6.35e-67
	chr15	57191249	57191459	LOC145783	19239	67	87.8	5.83e-267
	chr15	57359733	57359943	LOC145783	149036	168.4	147.53	0
	chr15	57442361	57442571	TCF12	69085	55.5	145.48	4.6e-253
	chr15	57846585	57846795	GCOM1	37308	15.2	19.91	3.84e-36
	chr15	57846585	57846795	MYZAP	37308	15.2	19.91	3.84e-36
	chr15	57966857	57967067	POLR2M	31653	48.7	129.15	7.45e-219
	chr15	58502400	58502610	AQP9	71992	53.7	47.13	5.04e-178
	chr15	59025941	59026151	ADAM10	16027	32.3	84.74	1.12e-127
	chr15	59104817	59105027	FAM63B	41424	60.4	22.68	1.73e-150
	chr15	59458013	59458223	MIR2116	5239	677.2	355.69	0
	chr15	59911689	59911899	GCNT3	7707	115.5	302.71	0
	chr15	59990000	59990210	BNIP2	8358	37.2	195	3.98e-182
	chr15	60083646	60083856	BNIP2	102004	17.7	23.23	1.81e-45
	chr15	60351473	60351683	FOXB1	55052	63.3	82.95	1.18e-247
	chr15	60396584	60396794	FOXB1	100163	42.8	56.15	3.62e-150
	chr15	60815392	60815602	LOC101928784	44015	171.1	74.78	0
	chr15	61201157	61201367	LOC100996876	227389	28.4	75.04	1.5e-110
	chr15	61701299	61701509	VPS13C	651156	80	104.9	0
	chr15	62554886	62555096	MIR8067	41838	773.2	676.03	0
	chr15	63010880	63011090	TLN2	71370	39.1	20.52	1.45e-93
	chr15	63449348	63449558	RPS27L	184	540.9	237.28	0
	chr15	63720610	63720820	LOC102723344	38181	69.7	61.09	8.6e-251
	chr15	64900160	64900370	OAZ2	95093	57.2	301.18	0
	chr15	65059336	65059546	MIR1272	4622	59.2	77.59	1.31e-228
	chr15	65195804	65196014	ANKDD1A	8088	15.8	20.67	9.34e-39
	chr15	65299188	65299398	SPG21	16904	31.7	41.6	3.4e-101
	chr15	66025118	66025328	MIR4511	13448	34.7	30.29	3.02e-97
	chr15	66106172	66106382	DENND4A	21541	44.8	117.41	9.35e-194
	chr15	66368945	66369155	MIR4311	36374	12.7	33.18	4.36e-38
	chr15	66489055	66489265	MEGF11	56811	52.4	27.57	8e-142
	chr15	66534335	66534545	MEGF11	11531	15	79.63	5.41e-59
	chr15	66816373	66816583	ZWILCH	18952	94.2	82.36	0
	chr15	68564325	68564535	FEM1B	5607	16.7	21.95	2.06e-41
	chr15	69977952	69978162	LOC145837	123893	7.79	40.84	2.38e-25
	chr15	71082982	71083192	LRRC49	62387	15.4	40.33	4.62e-49
	chr15	71342915	71343125	CT62	64715	25.5	33.69	5.64e-76
	chr15	71395441	71395651	CT62	12189	67	25.09	6.59e-174
	chr15	71656518	71656728	LOC101929196	175120	149.3	196.28	0
	chr15	71740099	71740309	LOC101929173	243570	96.6	50.74	0
	chr15	71902226	71902436	LOC101929173	81443	42.6	28.08	2.59e-117
	chr15	71952817	71953027	LOC101929173	30852	21.6	113.32	1.18e-92
	chr15	72484553	72484763	GRAMD2	5374	116.6	102.26	0
	chr15	72740153	72740363	ARIH1	26305	71.3	187.34	0
	chr15	73458184	73458394	NEO1	113359	313.9	823.9	0
	chr15	73624959	73625169	HCN4	36437	9.15	47.98	2.8e-30
	chr15	73816342	73816552	NPTN-IT1	45333	56.3	21.15	4.44e-137
	chr15	74437958	74438168	ISLR2	15215	171.3	64.17	0
	chr15	74589786	74589996	CCDC33	61156	26.9	35.22	1.37e-80
	chr15	74776535	74776745	UBL7-AS1	22929	36.8	96.99	3.75e-151
	chr15	75282693	75282903	SCAMP5	4974	23.8	20.76	6.34e-58
	chr15	75328616	75328826	PPCDC	12689	20.1	26.29	7.85e-54
	chr15	75566726	75566936	GOLGA6D	8247	10.7	56.15	7.41e-39
	chr15	75602082	75602292	COMMD4	26046	105.1	92.05	0
	chr15	75986455	75986665	CSPG4	18525	29.6	25.86	1.95e-78
	chr15	76196365	76196575	FBXO22	165	39.5	52.07	2.72e-136
	chr15	76453124	76453334	LOC101929439	20494	15	39.31	1.85e-47
	chr15	76561595	76561805	TYRO3P	9102	21.6	57.17	9.24e-78
	chr15	77605048	77605258	LINC00597	87302	59.8	156.71	4.96e-277
	chr15	77797992	77798202	HMG20A	84749	28.6	151.1	6.47e-133
	chr15	77819597	77819807	LINGO1	104903	19.3	25.52	2.04e-52
	chr15	78110886	78111096	LOC645752	108093	9.93	26.54	9.47e-28
	chr15	78439482	78439692	IDH3A	2028	56.7	49.52	8.17e-190
	chr15	79003996	79004206	LOC646938	40174	60.2	39.43	5.35e-186
	chr15	80295587	80295797	BCL2A1	31944	438.9	575.81	0
	chr15	80460818	80461028	FAH	15585	82.7	218.99	0
	chr15	80533768	80533978	LINC01314	10626	50.4	133.23	2.49e-227
	chr15	80777818	80778028	LOC101929586	77258	119.4	78.48	0
	chr15	81725454	81725664	TMC3	59036	108.3	71.08	0
	chr15	82172743	82172953	MEX3B	165532	34.7	91.37	2.75e-141
	chr15	82314461	82314671	MEX3B	23814	207.8	181.9	0
	chr15	83410885	83411095	LOC283693	2353	76.1	66.7	1.7e-281
	chr15	85265896	85266106	SEC11A	6205	78.9	206.74	0
	chr15	85433465	85433675	SLC28A1	5573	28.6	75.04	1.5e-110
	chr15	86160520	86160730	AKAP13	2452	58.2	152.63	2.82e-268
	chr15	86214427	86214637	AKAP13	51246	20.8	27.57	3.98e-58
	chr15	87909277	87909487	LINC00052	210674	42.1	27.57	2.02e-114
	chr15	89164440	89164650	AEN	0	351.4	153.82	0
	chr15	89247555	89247765	ISG20	65516	43	225.63	5.92e-217
	chr15	89432640	89432850	HAPLN3	5921	11.5	60.24	2.13e-42
	chr15	89954783	89954993	LINC00925	33510	31	20.29	1.94e-74
	chr15	90056550	90056760	LINC00928	10506	14.2	37.26	2.75e-44
	chr15	90975636	90975846	IQGAP1	44163	23.2	30.63	6.35e-67
	chr15	91032870	91033080	CRTC3	40039	32.7	21.44	1.02e-79
	chr15	92691174	92691384	ST8SIA2	245757	20.4	109.24	1.46e-88
	chr15	92992591	92992801	C15orf32	22107	134	88.06	0
	chr15	92994777	92994987	C15orf32	19921	21.6	56.66	5.27e-76
	chr15	93345545	93345755	ASB9P1	6831	149.9	131.02	0
	chr15	93493235	93493445	MIR3175	45606	336.5	220.65	0
	chr15	95770213	95770423	LINC01197	99907	41.3	21.64	1.64e-101
	chr15	96232720	96232930	LINC00924	256398	80.2	105.16	0
	chr15	97108580	97108790	SPATA8-AS1	217778	18.1	23.74	7.68e-47
	chr15	97380333	97380543	SPATA8	53654	7.2	37.77	3.61e-22
	chr15	98264081	98264291	LINC00923	153369	49.5	65.08	2.89e-182
	chr15	99161801	99162011	IGF1R	29758	13.8	36.24	1.02e-42
	chr15	99440302	99440512	PGPEP1L	108374	46.1	30.25	5e-129
	chr15	99718015	99718225	SYNM	72729	71.7	187.85	0
	chr15	99804450	99804660	HSP90B2P	6720	86.8	76.06	0
	chr15	99810834	99811044	HSP90B2P	13104	119.9	314.45	0
	chr15	100508057	100508267	DNM1P46	160925	14.2	74.53	3.21e-55
	chr15	101202584	101202794	ASB7	59829	32.1	84.23	1.12e-127
	chr15	101417749	101417959	ALDH1A3	2051	40.7	21.44	3.55e-100
	chr15	101675355	101675565	CHSY1	116573	19.9	26.03	7.85e-54
	chr15	101899202	101899412	LOC100507472	49693	22.6	29.61	5.82e-64
	chr15	101901687	101901897	LOC100507472	52178	17.9	23.48	1.81e-45
	chr15	102233129	102233339	TARSL2	31307	78.5	205.72	0
	chr16	356032	356242	PDIA2	22914	7.4	38.8	9.51e-24
	chr16	415800	416010	MRPL28	4560	40.1	52.58	5.17e-138
	chr16	1884178	1884388	FAHD1	6953	15.6	40.84	4.62e-49
	chr16	1886372	1886582	FAHD1	9147	50.8	33.31	1.51e-148
	chr16	1960483	1960693	HS3ST6	7539	35.2	184.79	9.85e-171
	chr16	2398721	2398931	ABCA17P	7798	37.2	196.02	2.03e-184
	chr16	2518533	2518743	NTN3	2758	16.5	86.78	1.14e-66
	chr16	2583319	2583529	MIR3178	1313	76.9	101.33	2.74e-320
	chr16	2966105	2966315	FLYWCH1	4125	21	112.3	1.18e-92
	chr16	3168237	3168447	ZNF205-AS1	2638	16	83.72	8.25e-63
	chr16	3788806	3789016	TRAP1	21208	48.5	42.54	6.65e-155
	chr16	3889420	3889630	CREBBP	40492	19.7	52.07	4.65e-69
	chr16	3973493	3973703	LOC102724927	26743	8.96	23.48	1.48e-23
	chr16	4190769	4190979	ADCY9	24583	715	469.38	0
	chr16	4225170	4225380	ADCY9	58984	16.9	88.82	1.3e-68
	chr16	4351783	4351993	LOC101926896	26349	69.5	91.63	1.39e-282
	chr16	4637696	4637906	UBALD1	27022	31.9	84.23	1.12e-127
	chr16	4675923	4676133	MGRN1	1098	53.2	70.19	1.42e-200
	chr16	4715166	4715376	MIR6769A	5944	19.9	104.14	1.67e-84
	chr16	4795700	4795910	C16orf71	11411	29	76.06	1.98e-112
	chr16	4947406	4947616	PPL	39521	57	50.03	3.29e-193
	chr16	5381397	5381607	FAM86A	233576	18.3	47.98	1.45e-60
	chr16	5455863	5456073	LOC101926950	210179	56.5	148.04	1.45e-259
	chr16	5892872	5893082	MIR8065	210404	11.3	29.61	4.3e-32
	chr16	8411387	8411597	TMEM114	210630	10.3	54.11	4.15e-37
	chr16	9081067	9081277	USP7	50481	9.93	26.03	9.47e-28
	chr16	10928209	10928419	TVP23A	15588	18.3	47.98	1.45e-60
	chr16	11283814	11284024	SOCS1	66016	31	81.16	6.42e-122
	chr16	11399935	11400145	PRM1	24743	68.9	180.71	0
	chr16	11449995	11450205	RMI2	10684	53.2	69.93	9.95e-199
	chr16	11656375	11656585	LITAF	24738	79.8	104.65	0
	chr16	11875612	11875822	ZC3H7A	15293	106.9	141.14	0
	chr16	11974014	11974224	RSL1D1	28572	79.4	41.65	6.96e-251
	chr16	12350962	12351172	SNX29	280360	21	55.13	2.95e-74
	chr16	12632464	12632674	MIR4718	181505	17.9	46.96	6.83e-59
	chr16	13034101	13034311	SHISA9	38624	22.6	59.21	2.7e-81
	chr16	13547270	13547480	ERCC4	466535	29	25.35	5.01e-77
	chr16	14494398	14494608	MIR365A	91256	63.3	55.3	4.96e-219
	chr16	15286774	15286984	MIR3180-4	37915	13.4	35.22	3.66e-41
	chr16	15738125	15738335	MIR484	974	56.5	37.14	9.37e-172
	chr16	16105383	16105593	ABCC1	61949	97.9	85.59	0
	chr16	16162779	16162989	ABCC1	119345	54.3	142.42	1.37e-246
	chr16	16955613	16955823	NPIPA8	482511	16.5	86.78	1.14e-66
	chr16	17609318	17609528	XYLT1	44580	49.3	43.05	3.62e-158
	chr16	19019742	19019952	TMC7	24486	16.5	43.9	6.23e-54
	chr16	19536543	19536753	CCP110	1364	79.6	69.59	3.65e-296
	chr16	20877184	20877394	LYRM1	34164	811.3	425.63	0
	chr16	20979446	20979656	DCUN1D3	67885	15.8	41.35	1.13e-50
	chr16	21711009	21711219	OTOA	21174	18.9	24.76	1.3e-49
	chr16	22009934	22010144	PDZD9	2288	66	346.1	0
	chr16	22076662	22076872	VWA3A	26988	45.8	29.99	1.5e-127
	chr16	23188698	23188908	SCNN1G	5133	41.3	108.22	2.8e-175
	chr16	23559038	23559248	EARS2	9449	37.6	33.01	9.45e-111
	chr16	23720848	23721058	ERN2	3764	40.5	35.39	1.68e-121
	chr16	24008072	24008282	PRKCB	160772	32.5	21.31	1.02e-79
	chr16	24330957	24331167	CACNG3	64083	17.3	45.43	3.14e-57
	chr16	24393176	24393386	CACNG3	126302	162.2	106.43	0
	chr16	24601394	24601604	RBBP6	50486	26.3	34.46	1.66e-77
	chr16	25038010	25038220	LOC554206	4843	75.5	66.36	1.13e-279
	chr16	25290911	25291121	ZKSCAN2	22056	8.76	45.94	1.29e-28
	chr16	25565118	25565328	HS3ST4	138020	328.5	1722.32	0
	chr16	25580394	25580604	HS3ST4	122744	15.4	80.65	6.76e-61
	chr16	27034443	27034653	C16orf82	43567	16.9	44.41	1.42e-55
	chr16	27420169	27420379	IL21R	18201	111	97.16	0
	chr16	27426088	27426298	IL21R	12282	59	77.34	1.01e-226
	chr16	27735327	27735537	KIAA0556	173859	38.7	50.79	3.71e-131
	chr16	27808192	27808402	KIAA0556	246724	48.1	126.09	1.56e-212
	chr16	28005017	28005227	GSG1L	69604	150.3	790.21	0
	chr16	28548513	28548723	NUPR1	1773	67	88.31	6.62e-269
	chr16	28641954	28642164	SULT1A1	21305	11.3	29.61	4.3e-32
	chr16	28911378	28911588	LOC100289092	20136	111.6	146.5	0
	chr16	29654654	29654864	SPN	19677	41.3	27.18	1.51e-111
	chr16	29730348	29730558	C16orf54	26783	10.5	27.57	3.5e-29
	chr16	31281861	31282071	ITGAM	10573	57.4	75.29	3.43e-219
	chr16	31285154	31285364	ITGAM	13866	133.2	351.71	0
	chr16	46818615	46818825	MYLK3	36394	19.5	25.52	2.04e-52
	chr16	47068124	47068334	DNAJA2	60499	25.9	34.2	1.66e-77
	chr16	47078573	47078783	DNAJA2	70948	29	38.03	5.57e-90
	chr16	47093214	47093424	NETO2	84513	51.4	45.26	4.88e-168
	chr16	47493327	47493537	ITFG1	1479	54.7	35.86	6.08e-164
	chr16	47646652	47646862	PHKB	151442	21.8	19.06	2.03e-51
	chr16	47828488	47828698	LOC101927132	63795	17.9	93.93	1.57e-72
	chr16	49889580	49889790	ZNF423	2041	28.2	24.84	3.18e-74
	chr16	50200879	50201089	PAPD5	14050	49.1	43.05	3.62e-158
	chr16	50850642	50850852	CYLD	74681	13.2	69.42	1.2e-49
	chr16	50864672	50864882	CYLD	88711	33.1	43.65	1.02e-107
	chr16	51347196	51347406	SALL1	162013	63.1	165.39	6.82e-297
	chr16	51587296	51587506	LOC101927364	208925	90.5	238.39	0
	chr16	51839371	51839581	LOC101927364	42941	24.7	64.83	2.94e-90
	chr16	53045425	53045635	CHD9	43311	64.4	338.95	0
	chr16	53075688	53075898	CHD9	13048	54.7	144.46	6.67e-251
	chr16	53086444	53086654	CHD9	2292	184.2	161.14	0
	chr16	53176800	53177010	CHD9	87855	20.1	26.29	7.85e-54
	chr16	53412083	53412293	LOC102723373	4678	82.6	216.44	0
	chr16	53624065	53624275	AKTIP	86895	8.18	43.9	5.66e-27
	chr16	53960195	53960405	FTO-IT1	112901	40.7	106.69	3.24e-171
	chr16	54637148	54637358	IRX3	316770	14.4	37.77	2.75e-44
	chr16	55511375	55511585	MMP2	1497	42.4	22.26	1.54e-105
	chr16	56102817	56103027	CES5A	112874	8.76	22.97	3.42e-22
	chr16	56556156	56556366	BBS2	2148	120.5	78.99	0
	chr16	57311537	57311747	PLLP	6838	34.7	30.46	9.97e-99
	chr16	57351598	57351808	PLLP	33014	29.4	38.54	1.45e-91
	chr16	58646991	58647201	CNOT1	16590	40.3	35.22	5.93e-120
	chr16	58777150	58777360	GOT2	8889	17.1	44.92	1.42e-55
	chr16	60022609	60022819	LOC101927580	133352	15.2	39.82	1.85e-47
	chr16	61357361	61357571	CDH8	713169	21.4	56.15	5.27e-76
	chr16	61967247	61967457	CDH8	103283	29.6	77.59	2.57e-114
	chr16	62067839	62068049	CDH8	2691	21.4	112.3	1.18e-92
	chr16	64471630	64471840	CDH11	684080	81.4	429.81	0
	chr16	65133580	65133790	CDH11	22130	36.8	19.4	9.04e-86
	chr16	65803052	65803262	LINC00922	192849	101.4	133.23	0
	chr16	65918126	65918336	LINC00922	307923	34.9	30.46	9.97e-99
	chr16	66042722	66042932	CDH5	357594	37.8	99.03	3.98e-157
	chr16	66519973	66520183	CTD-2258A20.5	9668	13.6	35.73	3.66e-41
	chr16	66709032	66709242	CMTM4	21369	28.2	37.01	7.94e-87
	chr16	66961891	66962101	RRAD	2452	291.5	255.06	0
	chr16	66987362	66987572	CES3	13807	38.4	50.28	1.88e-129
	chr16	67578433	67578643	FAM65A	7068	9.35	49	5.83e-32
	chr16	67944195	67944405	PSKH1	17020	25.7	67.38	1.02e-95
	chr16	68000165	68000375	SLC12A4	2223	272.4	238.05	0
	chr16	68125659	68125869	NFATC3	6390	39.7	26.16	7.61e-106
	chr16	68145314	68145524	NFATC3	26045	50.2	131.7	4.38e-223
	chr16	68309621	68309831	SLC7A6	11202	74.4	32.58	5.42e-215
	chr16	68970765	68970975	TANGO6	93256	114.1	74.91	0
	chr16	69904801	69905011	WWP2	53876	12.9	33.69	4.36e-38
	chr16	70167377	70167587	PDPR	19848	36.2	31.65	3.34e-103
	chr16	70612849	70613059	IL34	740	55.1	144.97	6.67e-251
	chr16	70816236	70816446	VAC14	18616	33.3	87.29	1.77e-133
	chr16	70973327	70973537	VAC14	138266	63.7	27.82	4.25e-172
	chr16	71168521	71168731	HYDIN	95895	52.6	68.91	4.77e-195
	chr16	71428320	71428530	CALB2	35704	14.2	37.26	2.75e-44
	chr16	72082821	72083031	HP	5478	20.1	106.18	1.58e-86
	chr16	72805085	72805295	ZFHX3	287240	42.4	37.09	2.65e-129
	chr16	73074242	73074452	ZFHX3	18083	22.2	19.4	1.05e-52
	chr16	73768946	73769156	LOC100506172	348242	28.2	74.02	1.13e-108
	chr16	74465306	74465516	CLEC18B	9938	218.5	143.31	0
	chr16	74763890	74764100	MLKL	29101	53.3	46.79	2.37e-176
	chr16	74773483	74773693	FA2H	35037	24.1	126.6	3.32e-107
	chr16	74779759	74779969	FA2H	28761	28.4	75.04	1.5e-110
	chr16	74901654	74901864	FA2H	92925	57	75.04	3.43e-219
	chr16	75121143	75121353	LDHD	29318	84.9	446.15	0
	chr16	75519975	75520185	CHST6	8742	58.2	76.57	7.8e-225
	chr16	75553875	75554085	CHST5	14984	27.1	70.96	3.12e-101
	chr16	75702416	75702626	TERF2IP	20781	40.3	26.42	2.9e-107
	chr16	75803757	75803967	TERF2IP	122122	17.5	22.97	4.16e-44
	chr16	75937392	75937602	TERF2IP	255757	98.9	259.32	0
	chr16	77491019	77491229	ADAMTS18	22008	45	29.61	4.47e-126
	chr16	78012450	78012660	CLEC3A	50327	47.3	124.04	2.46e-208
	chr16	78025655	78025865	CLEC3A	37122	533.3	467.42	0
	chr16	78029805	78030015	CLEC3A	32972	378.5	1987.76	0
	chr16	79711795	79712005	MAF	77173	38.9	34.03	2.47e-115
	chr16	81533359	81533569	MIR7854	33939	40.5	35.56	1.68e-121
	chr16	81565142	81565352	MIR7854	2156	23.2	20.25	2.67e-55
	chr16	81844658	81844868	PLCG2	31795	54.7	286.88	1.41e-291
	chr16	81962785	81962995	SDR42E1	82099	34.7	30.46	9.97e-99
	chr16	82265120	82265330	MPHOSPH6	61291	32.9	86.27	1.54e-131
	chr16	82557370	82557580	CDH13	102820	33.9	22.21	9.9e-84
	chr16	82667670	82667880	CDH13	7271	220	144.21	0
	chr16	82766698	82766908	LOC101928446	40017	30.4	159.27	1.12e-141
	chr16	83159947	83160157	LOC101928417	136044	285.6	249.96	0
	chr16	83287292	83287502	MIR3182	254450	7.59	39.82	9.51e-24
	chr16	83670574	83670784	MIR3182	128623	104.6	274.12	0
	chr16	83881333	83881543	HSBP1	39825	39.9	104.65	3.61e-167
	chr16	84056587	84056797	SLC38A8	18966	17.1	89.84	1.3e-68
	chr16	84817155	84817365	CRISPLD2	36223	12.7	33.18	4.36e-38
	chr16	85186341	85186551	LOC400548	15585	41.3	54.11	3.38e-143
	chr16	85237906	85238116	LOC400548	67150	21	110.26	1.33e-90
	chr16	85394129	85394339	MIR5093	54198	29.4	77.08	2.57e-114
	chr16	85548447	85548657	GSE1	96373	41.5	54.62	6.2e-145
[truncated: 3,469 more rows]
