# Supplementary material for: Identification of a core TP53 transcriptional program with highly distributed tumor suppressive activity
Source: HighWire-hosted journal article supplement (doi:10.1101/gr.220533.117), 2017-09-13
Supplement: Supplemental_File_S5_TP53-regulated_gene_classes.xlsx [file Supplemental_File_S5_TP53-regulated_gene_classes.xlsx]

## Sheet: Sheet1
		UP REGULATED GENES													DOWN REGULATED GENES
	Cell line	HCT116				MCF7				SJSA					HCT116				MCF7				SJSA
	Category within the TP53 network	Early direct	Late with proximal TP53 binding	Late without proximal TP53 binding	Translational	Early direct	Late with proximal TP53 binding	Late without proximal TP53 binding	Translational	Early direct	Late with proximal TP53 binding	Late without proximal TP53 binding	Translational		Early direct	Late with proximal TP53 binding	Late without proximal TP53 binding	Translational	Early direct	Late with proximal TP53 binding	Late without proximal TP53 binding	Translational	Early direct	Late with proximal TP53 binding	Late without proximal TP53 binding	Translational
	# of genes	90	67	573	472	76	134	1343	356	52	95	1623	475		1	11	1016	537	0	7	1650	283	1	4	1626	271
	gene names	TP53INP1	MARCH8	INPP5D	CBS	TP53I3	ANKRD65	CYGB	DRAXIN	ASCC3	LCE1E	PDE6G	MYO16-AS1		MCM5	HNRNPUL1	HSPA8	SLC16A3		RRM1	NHP2	RPS25	CTC1	ADD3	CCDC50	PCM1
		CDKN1A	COL17A1	PVRL4	SCN2A	FAS	CLCA2	LINC01164	CALML3	CYFIP2	TRIAP1	HES2	OR7E47P			GNA11	SF3B1	LSR		FAU	PSMD2	BLVRB		EME1	ETV5	HPRT1
		BTG2	GATC	SORCS2	CDNF	SLC12A4	LCE1E	ALOX12B	KRT6B	SULF2	TYMSOS	LOC100130075	PDE6C			NUCKS1	TSEN54	ABR		XPO5	NPDC1	RAE1		AK4	PTPLAD1	JADE2
		MDM2	APOBEC3H	PTCHD4	KRTAP2-3	CDKN1A	ACTA2	SUGCT	LGALS7	SESN1	LOC100996351	EPS8L2	LINC01119			RAD51C	NFKBIB	SLC25A10		MRPL14	PTMS	MDH1		ZNF33A	PNPLA6	TMTC3
		TNFRSF10C	TRAK1	UNC5B-AS1	MIR1204	TNFRSF10C	COL17A1	UNC5B-AS1	GAS6-AS1	PRKY	APOBEC3H	GAL3ST1	JARID2-AS1			EME1	NDC1	SPINT1		EME1	ANAPC5	SLC25A3			AAGAB	CWF19L1
		HES2	EFCAB10	PTAFR	TOB1-AS1	FDXR	EI24	KANK3	KRT78	TGFA	FAM87A	TBX4	INHA			SART3	CCDC137	NUMA1		TIMM21	RPS15	RPS5			FBLIM1	USP24
		FAS	ASTN2	HMCN2	C14orf182	MDM2	PRKAB1	ASPG	TMEM130	PSTPIP2	SERPINE1	TMEM105	FAM90A1			FAR1	RTN4	SLC25A1		HAUS8	INO80E	RPS14			GNPAT	BDP1
		C19orf82	EI24	RNF157-AS1	RSPO4	CMBL	TRIAP1	LY6D	LGALS7B	ANXA4	DCP1B	UBASH3A	GAST			PUSL1	HPRT1	FLII			ANXA5	POLR2G			PHTF2	TMEM194A
		PLK2	PMAIP1	PLXNB3	CD79B	ZNF488	TMEM253	APOBEC3C	LEMD1	PPM1D	KLHDC7A	C17orf64	SRRM2-AS1			FLOT1	SLTM	CARD10			ATP1B3	ESD			CTNNAL1	XPO1
		SERPINB5	GPX1	ABCA1	LINC00662	SPATA18	SERTAD1	ANK1	TTYH1	SGK223	ZNF79	CSPG4	TCTEX1D4			SPC24	ANO1	NRBP1			BCCIP	OBSL1			CDC25B	VBP1
		FAM212B	PCNP	YPEL2	LINC00920	HES2	APOBEC3H	PTCHD4	BAALC	ATF3	GPX1	GAS6-AS1	LINC00115			RANGAP1	SMARCC1	PDIA6			PHB	RPS11			NSMAF	PYGL
		RPS27L	LINC00663	RINL	SYT13	GDF15	GPD1L	DAPK1	CCL22	ZMAT3	TSPAN11	UNC5B-AS1	VPREB3				MRTO4	ERO1L			FAM136A	RPRD2			PPP4R1	PHIP
		SESN1	GJB5	C2orf88	NRG1	NYNRIN	GATS	GLS2	FBLN2	HSPA4L	IER3	FUT3	LOC100506655				DUS3L	TCF25			MRPL38	RPL24			NLE1	ERCC6L2
		ZMAT3	KCNJ12	CEACAM1	HCG11	TP53INP1	EFCAB10	LOXL4	PRAP1	TNFRSF10B	FOLR4	FUT5	EPN3				C16orf80	ATP5B			MRPL51	RPL35A			POLD1	PTTG3P
		ACER2	REV3L	KIAA1324	CXCL8	EDA2R	ASTN2	TMEM249	FAM25A	DRAM1	LINC00663	LOC101929224	GPR37L1				MRPS2	ABHD11			TOR3A	ATP5A1			RCCD1	TBC1D15
		CYFIP2	WDR63	LINC00086	MAML3	FOSL1	TRIM32	GGT6	CD79B	POLH	FBXW7	KRT78	BRE-AS1				TCF3	MED27			PMPCA	EIF2S3			HMGA2	HSD17B4
		SYTL1	ABCA12	ZBED2	LOC100506314	GADD45A	DQX1	PRODH	FAM83E	EDA2R	ADRB2	TSGA10IP	TOB1-AS1				WDR5	TSEN34			ERI3	LRRC75A-AS1			C17orf85	HIF1A
		LOC101927501	SNCG	LYNX1	EPB41L4A-AS1	BTG2	LINC01021	LCE1C	NKAIN4	ACER2	CLP1	SERPINF2	WWTR1-AS1				MEPCE	MCM3AP			RPUSD1	LGMN			MMADHC	TPRKB
		GDF15	C17orf89	BIRC3	C5orf55	RRM2B	LOC101927501	HLA-DOA	CCDC114	C12orf5	LOC286059	FLJ31104	TCTE3				TAGLN2	CD81			MRPL21	NAP1L1			ALG5	TRPM7
		BBC3	SRA1	GJB4	FAM86JP	FAM212B	ADIRF	INPP5D	SDR16C5	MDM2	SAC3D1	HGFAC	LOC389641				KTN1	PIEZO1			MAGEF1	RPL22			HAUS8	FIG4
		PRDM1	ISPD	RPL23AP82	FSCN2	TP53TG1	SERPINB5	XG	FGF18	VWCE	SCN4B	TREM2	MIR181A2HG				PTGES3	SLC37A4			MYO1C	GNL3L			IFRD1	SLC25A10
		DRAM1	CEL	FAM222A-AS1	SLC8A2	CYFIP2	KLHDC7A	ACTBL2	KRT6A	RRM2B	ABCA12	PLEK	LINC01191				RBM42	MFN2			ABCF3	HNRNPL			OBSL1	KIAA0196
		RRM2B	PHPT1	PROM2	LOC441242	DDB2	MIR1204	CDIP1	ZBTB7C	FAM212B	E2F7	IGFL3	APOD				SLC7A5	LUC7L			APOA1BP	DDX1			NUP43	DNAJC13
		FDXR	LRP1	PRKG2	HTR7P1	BBC3	GBE1	CRYAB	PID1	ETV7	SPATA18	KANK3	PARK2				PPP3R1	ADH5			RRP7A	RPS8			MPI	FANCD2
		ACTA2	KRT15	LACC1	WDR72	PROM2	PMAIP1	ALDH1L1	RAET1L	XPC	C17orf89	CX3CR1	ST7-AS1				SH3GL1	IER2			FBP1	RBBP4			RPP30	TSTD2
		LOC101928100	MYH16	PHYHIP	LOC100130075	TYMSOS	IER3	PLIN4	FOXN1	IKBIP	C17orf82	SLC2A5	TNNT3				H2AFY	CPSF1			SAE1	DHCR7			FAM178A	AARS
		APOBEC3C	GPR87	MXD4	ELK3	SYTL1	FOLR4	MAF	LIPG	FBXO22	CEL	LINC01089	CPAMD8				HMGB3	GSDMD			TXNDC12	MRPL40			PAICS	MLF1
		ANKRA2	ZNF561	PTPRE	TMEM182	C12orf5	PRDM1	IVL	MESP2	STOM	LRPAP1	AGBL5-AS1	LRRC38				SLC29A1	NUCB1			HNRNPC	ALDH1B1			MRPL35	OXTR
		BLOC1S2	CD82	NLRP1	LOC100507459	TM7SF3	SMAD3	SPNS2	C6orf15	TNFRSF10D	DHRS3	KRT4	LOC101927323				CSNK2A2	ALG1			ZNF512B	NDUFS1			CSE1L	FUNDC1
		LAMA3	TP53I3	GATS	SNHG8	ACER2	LCN15	TBX4	CST6	FAS	PTK2B	FCGBP	INSL3				ILKAP	GLYR1			ILVBL	MCM3AP			CCDC88A	MAST3
		BAX	FAM210B	BLACAT1	GPR15	SESN1	MFGE8	RPTN	KRT37	DDB2	ENTHD2	KIAA1211L	DOCK9-AS2				REPS1	PFKL			ANKRD39	TUBD1			SEMA4B	FAR1
		NTPCR	LIF	TMEM229B	TGFBR2	CCDC90B	CGB7	CCDC60	BTC	PRDM1	GPR87	LSP1	MYLK-AS1				SHQ1	TARDBP			PPIG	VDAC3			RAB24	MX1
		GRIN2C	RHOD	GIPR	LURAP1L	IKBIP	PLK3	COL2A1	PLA2G2F	TP53INP1	ZNF337	ARHGAP30	NOTCH4				RCE1	C17orf85			HDAC2	IMPDH2			MTFP1	NFE2L3
		CMBL	TMEM64	ZNF469	NTN4	POLH	ABCA12	ANGPT4	WBP1	SESN2	HIST1H2BJ	LCE1C	LOC728743				TFRC	CKB			SF3B5	SF3A3			MOCS1	WDR11
		CCDC90B	ADCY7	SATB1	LOC100996455	BAX	AXL	OSBPL3	C10orf10	TRIM22	ICAM4	LOC100288181	LOC100129518				ANXA3	RAP1GDS1			WDR77	RPL37			MMGT1	ADNP
		PHLDA3	CSNK1G1	TMEM249	CXCL1	GRIN2C	C17orf82	MYO1A	KLHDC7B	ISG20	TP53TG1	GSG1L	NKAIN4				ANXA11	YTHDC1			PYCRL	HSD17B4			CYP27A1	FMR1
		DGKA	TMEM63B	KLLN	LOC100996579	HSPA4L	MBD6	RGS20	S100A3	BLOC1S2	PIDD1	TLR9	C15orf32				RANBP1	GRN			PLOD3	FTL			PSMG1	INTS6
		IKBIP	ORAI3	ZNF219	C10orf32	SESN2	SARS	EMP1	SEMA3B-AS1	BBC3	TRAF4	CATSPERD	SNORA57				TAP2	MSMO1			NHP2L1	ACAT2			GPT2	PECR
		TRIAP1	PNPO	DEPTOR	UBAC2-AS1	C19orf82	CELP	FAM196A	ANXA8L1	PTP4A1	FAM210B	MYRIP	HOXC-AS1				GRWD1	PPIL4			METAP1	DHPS			SRR	JMJD1C
		CCNG1	POLR3GL	SLC44A5	UGDH-AS1	BLOC1S2	ISPD	KLHL30	GJB3	RPS19	TRIM35	C19orf80	PLAC1				B4GALT1	CTNNB1			CDK4	UGGT1			ATF6	TRABD2A
		KANK3	SRSF8	ICAM1	GALNT5	CATSPERG	CEL	SLC52A1	PTGES	AEN	CSF1	PLCH2	MATN4				PGRMC1	VARS			TPI1	RPL5			NSUN5	RAD50
		PRKX	DMTN	HHAT	OSER1-AS1	ISCU	FAM98C	ADAMTS7	CCK	CDKN1A	LIF	IBA57-AS1	CSTA				PRPSAP1	SFSWAP			ABCF2	PRDX6			GLUL	CLCN4
		ATF3	STX17	RFX5	MGC72080	CCNG1	PHPT1	FHL2	LIPH	FDXR	GPR132	CLCA2	CPA5				MAGOHB	URGCP			PPP2R5C	SHMT2			ZDHHC20	SEC23IP
		KIAA0247	C9orf169	AATK	PIK3IP1	TNFRSF10B	LCE1B	FAXDC2	SPRR1A	CCNG1	C1orf68	LHFPL3-AS2	FRMD6-AS1				RBM17	COL6A1			PSMB3	RPS6			PARP12	CPED1
		GADD45A	SULF2	NUDT16P1	GRHL3	PRKX	DHRS3	HS3ST6	EMP3	BAX	PORCN	ZSCAN10	HIPK1-AS1				PWP2	NOSIP			TSPAN4	RPL37A			RFC2	ARFGEF1
		EPS8L2	FAM198B	NIPAL1	LOC101927045	ZNF79	GPR87	RHCG	IFIT1	PLK3	MGRN1	CDH22	KANSL1-AS1				CBX1	NFKB1			AIFM1	TLE2			ZNF445	MGA
		PLK3	CNOT6	MORN4	LINC00659	LINC00475	CD82	SNAI2	MIR210HG	NHLH2	ZNF707	NLRP12	FAM83H				LYAR	KIAA0907			SEMA4C	LIG1			RBBP7	CCDC28B
		C12orf5	CUEDC1	TNFRSF6B	WNT16	PHLDA3	PIDD1	XGY2	TM4SF1	RPS27L	FOSL1	IFITM10	NUTM2B				LRRC59	QSOX1			TXNL4A	EED			OPA1	GSG2
		PANK1	SFN	TMEM150A	ADAMTS16	PPM1D	TRAF4	HHAT	HIST1H2BG	BTG2	TNFSF4	FAT2	VIM-AS1				ANKRD54	MROH6			KNOP1	POLR2A			CCHCR1	CASP1
		TGFA	S100A2	MFSD4	C15orf56	ANXA4	SERINC5	KIAA1217	FAM155A	SLC30A1	ZNF385A	ITGB2-AS1	CRIP2				ERF	PAPD7			XRCC1	METTL17			HDAC2	COQ3
		PSTPIP2	PRKAB2	LTBP2	SCAMP1-AS1	ANKRA2	EPS8L2	LRRC15	HNRNPA1P33	PHLDA3	CPEB2	LCE1B	LOC100131655				LIMK2	FOXJ2			GRWD1	STXBP1			SMC6	SLC25A20
		PTP4A1	NUPR1	CES2	TMEM125	RPS27L	CSF1	SORBS1	DNAJC27-AS1	GDF15	SLC25A45	PRR30	IGSF23				SLC44A1	ATP1A1			CTCF	RPL26			D2HGDH	XRCC4
		SERPINE1	TLR3	C14orf28	PLLP	DRAM1	LIF	FGF1	PTGS1		CDC42BPG	CBY3	IQGAP2				BMS1	TRMT1			CNDP2	FDPS			EXOSC10	CHFR
		ZNF79	NOP14-AS1	RAB40B	KIAA1656	AEN	CROT	SSUH2	DCUN1D3		KIAA0247	LOC401286	SP6				PPP5C	MYO1C			FDX1L	SMIM4			CENPO	LNX2
		PGAP1	CDIP1	RGS20	FAM86DP	PGPEP1	FLJ26850	BLNK	LOC100506746		RAP2B	MYOZ3	YTHDF3-AS1				GLOD4	SNX8			NUDT16L1	RPL23A			ZNHIT2	TRIM23
		LPXN	KLHL30	PEAR1	CCAT1	KIAA1683	RHOD	MALL	CCL5		TRIM26	LOC101928766	C9orf172				THOC6	DDX17			ARHGEF1	IBTK			DHTKD1	CPNE3
		ISCU	ALDH1A3	FAM214A	MAP3K13	FBXO22	TMEM68	IL1RN	ZNF559		NINJ1	SYNDIG1L	HCN4				PSMD3	LOC344967			TIMM17B	ISOC1			SNRNP40	C1D
		TNFRSF10B	PLCXD2	RGS16	OTUD6B-AS1	STOM	ZNF524	NDRG1	NBPF25P		NEAT1	HPD	VPS37D				ELAVL1	RPS15			PRPF31	IGSF1			CHD1L	POLB
		TM7SF3	PTRH1	PRSS30P	FAM25A	FAM198B	DSCAML1	DPYSL4	IFIT3		TSKU	ARC	CIRBP-AS1				TMEM39B	GALK1			DCAF15	RBM5			POLR3C	WDR7
		PGPEP1	ABCB9	RPL23AP53	MICALCL	PTP4A1	CSNK1G1	CALD1	PPP1R3G		C9orf169	CEACAM1	PLLP				PRRC2A	SAP130			TNNT1	NUPL1			RTKN	TMEM14A
		POLH	VPS13D	C1orf116	TMEM139	XPC	SULF2	CHRNA3	KRT19P2		CPSF4	UCKL1-AS1	SPG20OS				RPN1	SLC12A2			DCXR	SRSF6			NARG2	SUPT20H
		AMZ2	TSKU	ANKRD33B	LOC100505549	ASCC3	KLRG2	PTAFR	HIST1H2BC		TIMM21	CES3	SMAD5-AS1				IFT22	CPNE1			VPS29	NDUFV2			IMPDH2	HACL1
		AMZ2P1	ZNF33B	MTURN	SAMD12	KIAA0247	TMEM63B	LAPTM5	SPRR1B		PLXNB2	LOC100132354	HIST1H3D				ATP1B3	LSM14B			TSPAN13	RPS9			KPNB1	HOOK2
		TRAF4	KCTD11	OR51B4	LOC728323	TNFRSF10A	MGRN1	SHC4	GNE		GPC1	CUX2	PHYHIP				ADNP2	SF3A3			COPRS	DCP1A			PIGM	KIAA1109
		APOBEC3D	PGF	NINJ1	NUP50-AS1	PCNP	PRKD2	C14orf182	ANKRD18B		PSMC4	MMRN2	HIST1H2AM				IWS1	HEXB			ADIPOR2	DANCR			TP73	FBXW9
		TCAIM	LINC00482	KDM5B	CACNB4	EML2	FAM212B-AS1	DUSP13	BCAR3		ZDHHC5	PTCHD4	C10orf10				PKN3	CLIC4			PRPF40A	MRPS18B			GMPPB	INTS4
		ASCC3	CEP85L	LOC100506860	TAF13	SCRIB	ORAI3	LEPREL1	IRF9		GADD45A	DKFZP434A062	LOC100506314				TCP1	PSAT1			UQCC2	CLEC11A			CLIP4	ORC3
		PRKAB1		SPRY1	FBXL19-AS1	CDC42SE1	NHLH2	ALPK3	PSAPL1		DYRK3	PEBP4	SNHG20				BCAP29	AHCYL1			BCL7C	RPL28			DOLK	TSPAN2
		PARD6G		FLJ32255	NMRK1	NTPCR	ZBTB7B	F8	INHBB		LOC101928837	SOWAHB	MAG				MYH9	ACTN1			ERP29	TBCE			ZMYM4	AKAP11
		DDB2		LHX5	ZBED5-AS1	RNF19B	AK3	FSTL4	RAB40B		IGFBP7	LOC644656	MAN1B1-AS1				CTNNA1	RPN2			C8orf33	RPS3			NARFL	SPRED3
		FHL2		C15orf52	AADACP1	DCP1B	CPEB2	KPNA7	PARP10		MTA2	KRT3	RASAL2-AS1				BRCC3	BAZ1A			PSMB6	XPO1			LANCL1	LOC283070
		FBXO22		C16orf52	WNT9A	ZNF337	SLC30A1	ATF3	SPRY4		PDE4C	ITGAL	ANXA2R				PRPF4	PLOD2			PTMA	NXF1			SPIN1	SHPK
		TCP11L1		PTGES	C6orf120	PANK1	CASK	SSTR5-AS1	EDN1		NUPR1	SLC6A13	ARID3A				FARSA	RELL1			MRPS23	MAPK12			INCENP	TNK2
		EFNB1		LINC00657	DGKG	REV3L	CDC42BPG	RNF157-AS1	RND1		TLR3	TNFSF9	FRMD8P1				RRP1B	PLIN2			XPOT	TMEM258			COMMD7	PARP11
		RAP2B		NCR3LG1	PMS2P5	RAB1A	TRIM26	LBX1-AS1	PXDC1		SBF1	GNA15	ARMC5				GNAI3	SGCB			EIF5AL1	POLR2B			TUBB2B	DCLRE1C
		ZNF337		BTN3A1	ARHGAP5-AS1	NOTCH1	RAP2B	CELF3	C15orf48		FTH1P3	NPM2	LOC100630923				KAT7	ANKRD10			NRP1	EEF1B2			CHST10	MAN2A1
		SESN2		PVT1	WNT10A		RNF224	TMEM229B	PRSS27		C19orf70	SLC5A5	PDCD4-AS1				FAF1	CLPTM1			EHMT2	RPL31			PHF10	FADS2
		RNF19B		BLCAP	HLA-DOA		BLCAP	OXTR	HLA-DRB1		PLK2	GNG7	HIST1H2AE				SKIV2L2	PRKCSH			HNRNPK	TMEM237			VPS45	TANC2
		PPM1D		ADAMTS7	C2orf27A		NINJ1	GABRP	C9orf152		ZNF423	RBFOX3	NME1-NME2				MPHOSPH10	MDH1			GALK1	MARS			LOC100862671	NME7
		NADSYN1		RAB37	TMED8		C9orf169	GAMT	IL11		ABCB9	C2	CRYAB				GOLM1	ESYT1			ANKRD52	PHLDB1			EBP	ZFYVE16
		SERTAD1		DLGAP1-AS1	HOXC-AS1		TSPEAR	PLXNA4	CREG2		EDN2	GRIK5	PRR5				UGP2	PMF1			NUCKS1	CDK5RAP1			PRPSAP2	WRAP53
		DUSP14		EPN3	LOC150381		PLXNB2	LTBP2	KLK5		IP6K3	C19orf83	NCKAP5L				PPP2CA	TMEM161A			GCN1L1	RPL7A			ABI2	CRYZL1
		XPC		DUSP18	SMKR1		GPC1	GAST	FGD2		DAO	FOXD2-AS1	HIST3H2A				RAC1	BRF1			YDJC	LONP1			UAP1	ZNF277
		KCNN4		KLHDC7A	RNF11		ITFG1	TIMP3	RPL23AP82		SDPR	ATE1-AS1	IL4I1				ST14	XRCC4			TRAF2	HNRNPA1			FBXO9	COG6
		DCP1B		PLEKHG1	PPP1R26-AS1		CAMK2G	HHATL	NPEPL1		SLC12A4	ASPRV1	TMEM91				CALU	DCTN1			OPA1	DPH1			C11orf73	PAPSS1
		ANXA4		BCL2L1	MIR22HG		MYO9B	KRT3	OASL		GIT1	EPPK1	FAM207A				SLC25A24	TMEM41B			GNL1	NUMA1			DNMT1	SFXN2
		INPP1		CASC10	ZBED3		LOC101928837	TNS4	PTRF		ZNF674-AS1	FLJ30679	LINC01011				LMAN2L	MAGT1			ALG5	ARMC9			TTI2	SEC23A
		DDIT4		LINC00883	ZNF485		LDB1	LYNX1	LOC389332		DTX4	LOC102060414	ECEL1P2				DDX51	WDR1			MRPS11	ACLY			TJP1	RPA3OS
		YBX3		ZNF621	SAMD5		GM2A	GJB4	OAS1		POU2F2	LGALS8-AS1	WWC2-AS2				PHLPP2	ENDOG			CCT7	AARS			EHBP1	THAP8
		TNFRSF10D		DUOX1	C12orf49		ZMAT3	DGKA	DISP2		ZFAND5	CAHM	GPR135				SERPINE2	PPP6R1			SET	SERPINB6			ABHD5	IFT52
				MXI1	LOC654342		KCNN4	SAMD9	IRF7		AKAP13	FLJ31356	C2orf54				ATXN2L	PTGR1			SAP18	EXOSC10			EHBP1L1	KIAA1328
				ADAP2	ZNF774		MBNL2	SYNC	ARID3A		RRAD	PHGR1	IGF2-AS				GPANK1	HSP90AB1			SLC25A15	VPS35			TMEM177	TTC33
				SOWAHB	BMS1P20		PADI4	FLG-AS1	HIST1H4H		PGF	FLJ44511	RGMB-AS1				MAP2K1	UNC45A			ATF5	WDR92			GMPR2	N4BP2L2
				NIPAL3	MALL		MTA2	NANOS1	GSTA4		CEP85L	UNC5B	LINC00926				MAT2A	CNN2			RPL36AL	PCYOX1L			CLGN	PAAF1
				VPS13C	GOLT1A		TEKT4P2	TP53INP2	TRAPPC2P1		TRIM55	IL16	LOC339240				IFRD1	FAM171A2			PRPF6	RPS13			TBL1XR1	GALNT12
				CYP4F3	RNF7		CNOT6	C1orf95	TGFBR2			LOC100506082	HOTAIRM1				ERP29	EDC3			CECR5	MIR600HG			PGGT1B	HIBCH
				RALGDS	ZNF658		CUEDC1	PPY	ANXA8			LOC100129917	LOC100506457				XPO1	LDHB			MRPL3	IRX4			PRPS2	AGL
				LOC283335	UFSP1		LINC00086	YPEL3	LOC100132831			MYOM1	MLLT4-AS1				ITGB1	CCP110			MRPL11	C10orf35			NIT1	APOOL
				SLC2A12	CELF5		MARVELD2	PSCA	LRRC4			OR52N4	MYO7B				CTPS1	P4HB			CAND1	VDAC2			NSUN4	SOAT1
				LINC00346	GPR176		SFN	CDH16	KAZALD1			NPC1L1	MUC7				PPP6R3	DAPK3			NDUFA9	PPWD1			INTS10	CLSTN3
				OR51B2	WWC2		PARD6B	NODAL	OVCA2			PKD2L1	LINC00936				HSPBP1	MAP4			ELAC2	PEX3			NAIF1	STXBP3
				SESN3	USP46		PDE4C	NPR1	KRTAP3-1			TMEM51-AS1	RBMS3-AS3				PAK4	DPF2			RNMTL1	GPR160			NUP85	FAM63A
				OR51B5	KTN1-AS1		S100A2	C3orf52	CYP4F22			ENO1-AS1	ELF3				PPIF	ADRM1			DPH7	IQCB1			FOXP1	CAAP1
				UBA6-AS1	HCP5		TUBB6	AKR1B10	NBPF10			LAD1	LINGO1				PAFAH1B1	CANX			TBL3	NUP43			RAD18	ARHGAP9
				CLUHP3	COX14		NUPR1	PAQR7	TMEM45A			SPATA31E1	CSF1R				ASH2L	PMPCA			ENO1	SFPQ			ELOVL5	TRPS1
				MATN1-AS1	COX20		SBF1	CAPN2	METRNL			CDX1	SH3BP2				YY1	NCKIPSD			CNPY3	SQLE			RAD54L	PGAP1
				PLXNB1	NEURL1		CALR	NIM1K	DTX2P1-UPK3BP1-PMS2P11			FETUB	LOC554206				FAM57A	ZMPSTE24			MPZL1	TRIT1			ING2	PIGA
				KSR1	SLC30A1		NOP14-AS1	NTSR1	RAB11B-AS1			LOC100507156	B3GALT2				BCLAF1	CCAR1			MKKS	SLC27A5			CHAMP1	ACOX3
				FXYD3	FAM167A		TMPRSS4	HMCN2	SOCS5			RFPL3S	LY6G5B				ESRP1	DHX34			RNF166	SMG9			FIP1L1	ATAD5
				YPEL5	LINC00938		GNA13	MIR22HG	OTUB2			LHX3	GPR146				LRRC42	CTSA			DNAJA3	RPS20			C19orf68	TMEM231
				EIF3J-AS1	PARP11		ARPC2	ARL14	HIPK2			MORF4L2-AS1	LINC01144				PDS5A	CCDC14			ALG1	PPCDC			HTATSF1	B4GALT6
				SYNC	GPD1		COBLL1	LRP1	RELB			LOC101927583	EFNA1				ZNF48	HSP90B2P			MATR3	ZNF326			COMMD2	PTPRK
				PORCN	GAS6-AS2		ZNF423	FCGBP	HIST1H3D			RNF112	KRT16P2				ELMSAN1	ATP6AP1			PRDX3	INTS4			IGF2BP3	C11orf74
				PLCD3	LOC100131691		PLK2	POU3F1	BICD1			USP12-AS2	FHIT				C9orf142	RCC2			MRPS15	RPL32			UCK2	ZBTB10
				FYN	ROM1		ALDH1A3	PRSS57	SECTM1			TMEM31	MZF1				TAF6	LRWD1			MTFP1	PNN			EIF2B2	STIL
				UST	METTL21B		LYPD6B	LOC284837	MESP1			DLGAP2	TRABD2B				VWA1	CDK5RAP3			DFFA	NOL9			ZNF45	ZNF180
				ANK1	ZNF365		FLJ16779	ZNF750	PABPN1			MBP	OAZ3				ROR2	DNAJA2			SF3B2	RPS27A			WDR54	STXBP4
				LYRM9	PHOSPHO1		EDN2	AMTN	TAF13			PSCA	HIST1H4J				SENP1	GSN			DHX15	NDUFC2			XKR8	ST6GALNAC3
				YPEL3	CECR7		RXRA	MICALL1	SIM2			SPDYC	MFI2-AS1				DOT1L	CSPP1			TXLNG	RPL29			CEP70	ZMYM6
				CEBPZOS	STARD7-AS1		SDPR	HMOX1	PWWP2B			LOC101927322	LOC100288911				CBX3	VGF			PAF1	KCNH2			MPP1	DPYD
				PNRC1	NIPAL2		ARHGAP42	KRT4	IFI27			PRKCG	SLC11A1				PRPS1	SP1			UMPS	MVK			SMYD5	METTL3
				TRIM2	LINC00847		MIR205HG	THEMIS2	PDGFB			LINC01265	OSCAR				GNB2	WDR54			CXXC1	DNAJC12			TMEM63A	CIPC
				VMAC	DNAJC22		TSKU	TRIM29	DNASE1L2			CXCR6	INCA1				TMEM51	ARHGEF16			POFUT1	RPL8			PLCE1	RAC3
				HECW1	TMEM241		ZNF33A	GAS7	PIK3R2			NHLH1	CTF1				ICMT	CSRP2			CINP	ILF3-AS1			FGF2	BDH2
				MARCH2	ZNF28		VWCE	PIK3IP1	KATNBL1			TP53I3	SOCS1				ACTL6A	OGDH			EFNA3	RPL13			CCDC77	KLC4
				S100A6	SNORD25		ZNF33B	NTF4	CSNK1G2			CD7	BIK				UACA	SEZ6L2			MRPL2	NUP214			SETD7	ASAP3
				CYS1	SLC37A2		SHANK2	KLLN	TMEM255B			MFNG	KRT19				FXR1	EHD2			CBR1	PNISR			MARCKS	DIRAS3
				TRPM6	FAHD2CP		KCTD11	CEACAM1	EVA1B			HHIPL1	PRRG2				SIN3A	NAGA			PSMB2	RPL15			SMARCD3	NPR2
				NDRG4	GTF2H5		PSTPIP2	CECR1	C21orf119			LOC100272217	DMWD				GTF3C5	SCAF4			DDX18	LOC728554			SLC39A1	HSPA2
				ANKRD29	DGUOK-AS1		PGF	LMCD1	EHD2			TNXB	BIN1				ANP32A	EPHX1			GPI	ANP32C			SMUG1	CEP72
				RGS6	C1orf53		CMTM3	HSPB8	SEC14L1			DLX3	HIST1H2AJ				ALG8	P4HA1			ATP5B	NUPL2			SERPINB1	BBS2
				ZNF37A	STAG3L2		TRIM55	NTN4	B4GALT5			LOC101928053	REEP2				ANAPC7	LLGL2			RPAP3	PCNA			HNRNPLL	BBS9
				DRAXIN	CEBPA-AS1		LINC00482	SLC7A8	HOMER3			SCNN1G	S100A3				TEX30	ZC3H3			PKN1	DCLRE1C			MTA3	ZCCHC4
				FAM83H-AS1	FAM227B		DMTN	ST6GALNAC2	C11orf71			INHBC	SDHAF1				PLEKHG2	HDAC1			RPS7	ANAPC4			CYP2U1	BBS4
				TTYH3	DANCR			TCEA3	BATF			C1orf213	KRT16P3				CAPRIN1	METTL3			D2HGDH	NME2			ZNF133	IKZF4
				SMIM3	KIAA1328			GJB5	PCSK1N			FYB	CAMK2N1				NUP98	RNASEH2C			TMX4	ACIN1			TRMT12	CCDC132
				LOC100506710	THAP7-AS1			EPAS1	MXRA7			RFPL1S	IER5L				UBN1	GOT2			PYCR2	RPL19			PDLIM7	NUP155
				PLEKHA8	ZNF25			SERPINE1	HIST1H3H			HSD52	SNAI3-AS1				NOP14	HMGN5			CLDN7	RPL27A			CECR5	MAPK10
				DCUN1D3	FOSB			CCR7	DAPK3			PYY2	SFN				SMARCA5	DPP3			TMEM138	RBM6			INO80E	XKR5
				SUGCT	TMEM44-AS1			PCBP4	WNT7B			LOC400684	ZNF771				DNTTIP2	TPR			CCDC137	RBM14			CDC45	MAOA
				KLF15	C4orf3			GSDMD	GPX3			SSSCA1-AS1	YBEY				UMPS	GAPDH			HDGF	C2orf15			CCAR1	C1QL4
				KIAA1107	SLC27A5			SRGAP3	LINC00938			C1orf210	BCL3				PCMT1	SMAD4			EBPL	PPP1R3C			METTL17	MYSM1
				LOXL4	LINC00888			A2ML1	LOC654342			HLA-DMA	SPACA6P				DDX56	PEX6			SURF2	CCNL1			TOE1	USP43
				LOC257396	BET1			KRT17	JMJD7			CLDN6	MIR143HG				UTP18	CREBBP			TSTA3	FLJ44635			MED21	THTPA
				KIAA0040	BATF2			PKP1	RAB22A			C6orf52	LOC100129534				CLUH	PSMD2			SMARCC2	MRE11A			FZD1	RALGAPA2
				PLCB1	C6orf1			TMEM140	HIVEP3			TINCR	LFNG				IPO4	STIM1			NOP9	ANKHD1			PGM1	DKK2
				TINAGL1	ZNF674			TAP1	CAMK2B			CTRC	HES4				GNL1	ZIC2			SNRPC	SNHG9			PPCS	DDAH2
				AKR1B10	LINC01234			CES2	FBLIM1			ACAN	SYT17				SET	GAA			SNRNP70	PAXBP1			RDH11	MYO5C
				TAB3	FOXN3-AS1			ACHE	ZNF274			CSF2	MRPL36				RBBP6	MPP2			HABP4	DIAPH2			SAP30	MYO5B
				ARRDC4	TSPAN12			CGNL1	ASXL2			INHBB	PDDC1				TOR1AIP1	SRGAP2			SRRM1	RPS21			MCM2	SLC16A4
				TEP1	HSD17B1			PTPRN2	S100A9			SEC1P	SH3GL1P1				AFG3L2	C19orf68			CPNE2	PPM1E			FAXC	CRMP1
				SEMA3G	UBE2D4			LAMP3	ELK3			DOK7	LOC100996324				MISP	TMEM56			NDUFA6	RPL18			CHAF1A	ALMS1
				KDM6B	FAM217B			SMIM5	PLIN3			LINC00452	RNF126				ATL2	SREK1			C1orf159	CKAP5			MAGEF1	AFAP1L2
				GABARAPL1	RPL23AP7			FADS1	NCK2			ICOSLG	EPB41L4B				EIF3B	KRT18			SEC23IP	LSM2			MTX2	AHI1
				TMEM117	LINC00673			C19orf83	ATP6V1G1			FSTL4	ABHD17A				NOC4L	ANKLE2			RMND1	GPR68			CSRP2	DOCK11
				GPR173	SLC9B2			SLC9A4	TCTA			LOC284080	HRCT1				RALY	EHBP1L1			EIF3B	C4orf27			CUL5	CHM
				GAS6-AS1	PABPC1P2			BCAS1	TMCO3			CHRM5	DDA1				PPAT	CNOT3			GNB5	ZNF692			HDGFRP3	CCPG1
				HSPG2	UBL3			ZNF385A	KRT20			EFNB1	CCDC103				PRMT5	METTL17			SNAPC4	BLOC1S1			AKAP1	TTC13
				C12orf76	GNG12			CEACAM5	TNFRSF12A			JHDM1D-AS1	LPP-AS2				PRPF6	TRIM11			EMC8	ZNF714			MTIF3	EAF2
				NPAS1	ZNF749			STEAP3	S1PR2			LINC01186	ATP6AP1L				SAE1	ARCN1			THAP4	TMEM254-AS1			FH	DIAPH2
				KDM4B	AP1AR			LYST	MAFG			TNNT2	KCTD11				DKC1	PEPD			IRF3	ID2			CCNF	HSD3B7
				IL12A	MIEN1			KRT16	BARX2			BOK-AS1	BASP1P1				ANKLE1	ELOVL3			CYC1	ACYP1			COQ2	NOV
				ZNF516	LOC101928710			FAM210B	ZNF710			MYBPHL	NUDT18				TTF1	HMHA1			C10orf2	PRPF39			RBBP9	GK
				MYEOV	DNAAF3			AQP3	DYNLT3			POU3F1	NDP				NUP54	CHKA			ZMYND19	SRR			ACP6	SAMHD1
				ACHE	GRK5			ZNF469	GID4			SLC52A1	LOC101928736				RPS6KA3	PDK3			PDCD5	ECHDC3			CDH2	APOL3
				RIMS3	FKBP1AP1			WBSCR27	PITX1			DHRS2	ABCA7				ARID1A	PIGK			PPP1R35	NKTR			ZMYND11	PTPRB
				PCNXL2	LINC00998			SDR9C7	ELF4			C11orf94	RASD1				CTNNAL1	POLRMT			UBQLN4	RPL27			BAZ1A	STAC2
				IDS	C21orf119			SMPD3	FAM114A1			KIF1A	ORAI3				MANEAL	GALNT12			DTNBP1	RPS16			CNKSR3	CYP2J2
				RASSF6	DNAJC12			PTPRH	HYAL2			HUS1B	PKDCC				SORBS3	CC2D1A			ENDOG	LEPRE1			RPL39L	SNX14
				TMEM40	CCNJ			ARRDC3-AS1	FAM214B			PPP1R32	RNF126P1				CDC5L	NRD1			CIRH1A	TPP2			GCNT1	ASB2
				SEMA4G	SAMD4A			PHYHIP	MOSPD3			THSD1	SOX3				PPWD1	SWAP70			HCFC1	CLEC2D			ARNT	PDE1C
				ETV7	C5orf28			ERRFI1	DHRS4			CPNE7	DNAJB2				THAP7	UHRF2			ZNF276	RPL13AP20			MPST	SLC46A1
				P2RY2	IL1R1			SESN3	COBL			WDR65	TREX1				EIF4G1	SLC25A40			DVL2	RPL13AP6			CSTF2	C12orf60
				ZNF383	RYK			RIN1	TNIP2			NEB	C20orf196				PAICS	UPF1			ERAL1	LOC646762			STX7	ZNF620
				PRRG2	MOSPD1			TMBIM1	GPX2			ZBTB7C	ZNF524				PCGF6	HR			MRPS26	PRCP			DNM1L	ERCC8
				ZDHHC21	LINC00941			AHNAK2	CDYL2			ASPA	C17orf49				NUDT21	DHX37			TARBP2	PPFIBP2			WDR73	STYK1
				GPR56	PSKH1			SLC28A1	CMIP			SRGAP3	FBXL8				TPM3	ATP2A3			SSSCA1	MT2A			ARSJ	ZNF268
				LOC100294145	TMEM167A			ZNF219	TGFB2			LINC00942	ZC3H12A				SH3PXD2B	TMEM104			PIGM	BCL11B			PDK3	GBP2
				RAB17	SNX13			PPP1R3B	SP6			PAX8	MYL5				ACLY	CSTF3			FAM173A	BLMH			MGC27345	ADRB1
				FAM134B	ZNF597			CMAHP	CRB3			OPRL1	KRT16P1				NUP188	NUP210			SPATC1L	EXOC6			AFG3L1P	LINC00654
				RPS6KA2	KIAA2018			FAM83F	HIST1H2AC			LINC00324	C19orf25				FKBPL	SMARCC2			ARHGEF19	RPLP1			SLC35A3	HSD17B6
				ARAP1	HIGD1A			DDIT4	SH3BGRL3			LRRC56	NGF				CCT8	CCDC82			MRPL22	ZNF789			SNW1	SMPDL3A
				EHF	C12orf73			IGFL1	RAP2A			UMODL1	GPRC5C				KIAA1731	FOXA3			SSBP1	ABHD3			C1orf27	SLC45A3
				CREBL2	LINC01278			TRIM5	TPRG1L			NFYC-AS1	FOXP4				HAUS6	NPIPB5			DDX27	HNRNPA3			RPAP3	FILIP1
				DDIT4L	CCNB1IP1			AKR1B15	LAD1			KLLN	NOP16				NUPL1	ATP5A1			RPF2	LINC00339			PLCG1	CCDC81
				KLF9	RAB30-AS1			CEACAM19	SVIL			TOLLIP-AS1	NUDT3				SEPT7	MGC27345			PCMT1	GALM			GPATCH11	CCDC106
				PCGF3	TPST2			FADS3	CHPF2			ALOX5	LOC101928796				UBA2	VPS52			CCAR2	GDPD1			C15orf38	EVC2
				TRIM5	OTUB2			PDE2A	CBFA2T3			DDIT4	PLAC9				NUP37	GAK			NAT14	HADH			LRRC8C	PRRG4
				LINC-PINT	DPH3			GRIN3B	TUSC2			DFNB31	TMEM198B				ZC3H14	ACO1			SART1	MBNL3			RNGTT	SMCHD1
				TM7SF2	HAS3			VAMP5	ZC3H10			ARHGAP4	SCAND1				C4orf27	PRMT7			CEP41	TTC26			ASUN	TSPAN15
				TMEM42	TMSB10			C16orf45	SULT2B1			WDR63	LOC100288778				PES1	PDLIM7			EIF4G1	NFKBIZ			C16orf45	PIBF1
				RASGEF1A	AKAP3			NEDD9	MORN2			IGFL2	ARL8A				TCEA1	RBMX2			GTF3C1	ARG2			MESDC2	RSG1
				SMTNL2	SMIM8			MFSD4	CSTB			TNK1	BCAS4				GTPBP4	DMAP1			PLEKHO1	LOC100505666			OSBPL6	APBA1
				PPAPDC2	PCDH7			FAM84A	ARHGAP29			ZFPM1	CLTB				DDX55	LAMP1			SIGIRR	RPS23			ATF2	TBC1D19
				TMEM263	GPR110			BHLHE40	CLTB			KLHL30	LYRM9				TNPO3	APP			TUFM	LOC100289092			PPAP2C	TTC30A
				AREG	DTD2			BTBD11	NR1H2			KRTAP20-2	MVB12B				DDX52	TRAP1			SF3B4	RPL9			SLC38A4	EHHADH
				ZNF70	ZSCAN31			SYNPO	COMT			OVGP1	LOC654342				LEMD3	TMEM214			APEH	SEPT1			ATP6V0A2	FBXO4
				CLN8	ARL15			ALDH3A1	PRSS23			LAPTM5	C11orf68				EPS15L1	PPP2R1A			ALDH18A1	RPL39			STAT5B	DNAH14
				POMGNT1	PNPLA4			C16orf98	MFSD6			KMT2E-AS1	GJC2				DDX5	LRRC47			DSG2	FAM65C			TXNDC15	LINC01124
				LOC100130899	TMA7			CASC10	BLOC1S4			SDCBP2-AS1	CARD10				CHD4	AP2A2			C1orf35	FIRRE			TIMM9	PGM5
				GARNL3	NUAK1			RFX5	AMIGO2			ZNF541	ARL5B				TEAD4	MED25			ATG3	HNRNPA1L2			ZNF664	WDSUB1
				C1orf210	ZNF655			HAS3	TBC1D10A			SERPINC1	C4orf48				SMARCB1	SRSF1			ESF1	GK5			BNIP1	LRRC17
				ABLIM1	PITPNA-AS1			LINC00887	EID1			ADAP2	WTIP				C11orf83	ACOT7			PAPD7	TMEM56			PDE9A	ARMCX1
				TCTA	S100A14			ZNF561	SNAPIN			GALNT9	UROS				PTPLAD1	TECR			SAFB	TP63			AGK	CCNA1
				MICALL1	SH3BGRL2			RGAG4	SOWAHC			CCDC116	TFAP2A				NFATC2IP	RFX1			SRGAP2	MSTO1			TMEM44	NXPH3
				NEU3	MREG			PIFO	SH3GL1			SNHG10	RPS14P3				CD9	HNRNPC			SLC25A10	ZNF300			FKBPL	ITGB8
				ZBED6	PSMB10			PI4K2A	CCDC64			SAA1	ALX4				CENPH	ALDH7A1			TMEM161A	VAT1L			ACAT2	ZNF792
				ITPKC	ZBTB22			KRT15	KCTD18			ELN	LINC00883				SEPT10	SFI1			DNAJC11	RPS10			TRIM7	INTU
				LINC00491	PPP1R15A			TNXB	ARL4C			HILS1	C21orf119				USP39	PLRG1			CMTR1	AXIN2			CBX1	MAP2
				SNN	PPTC7			KIAA0513	TRIO			ZNF205-AS1	RPL37				DNAJC2	CDKN1B			ZNF511	MPP3			NDUFS2	DDO
				RGP1	LINC00094			KCNF1	C1orf43			GREB1	CXXC5				ZYX	TARS			YWHAH	FAM117A			MRPS5	RASSF2
				FOXN3	FAM188A			KLF4	BET1L			LINC01311	CSNK1D				MYO19	CBX5			GFRA1	THOC6			PIGU	ATF7IP2
				SMIM14	ZNF252P			BCMO1	LPCAT1			ESRRB	TMEM222				BRPF1	GPATCH1			DDX21	CDC42EP5			ALG1	LRRC49
				ICK	MRPS31P5			SLC2A12	POMGNT1			LOC102723354	TMEM129				SGTA	PPP2R1B			SUPV3L1	CPNE7			SMPD2	DNAH5
				CCNYL2	TMEM161B-AS1			LDLRAD1	CABLES1			LINC00959	PXDC1				DHX15	DHX38			NIFK	FKTN			FAM8A1	KIF24
				TMEM129	PCED1A			PRSS22	PIP5K1C			LINC00880	BDKRB1				ATP2B1	ACTN4			EFHD1	FFAR2			BIVM	KIFAP3
				BBS9	SH2D2A			VANGL2	STARD10			KCNQ1	C2CD2L				GPS1	AP1M1			GRPEL1	GABBR1			NR2F6	CATSPER1
				BIK	SH3BGR			MYBPHL	FAM220A			TMC8	MRPL54				RDH11	UQCRC1			TFDP1	TEX14			MRPL22	IL22RA1
				MYOM3	EIF4A2			PVALB	GATC			NEXN-AS1	TMEM198				CSTF2T	MMP15			HEATR2	HIST1H2BE			UBE2C	TAF1A
				ZSWIM4	FABP6			ALOXE3	INPP5A			NR1D1	C19orf33				GNL2	PLCG1			RQCD1	CCDC14			PHF3	TMEM150A
				SLC16A5	PRKCQ-AS1			PODNL1	PAWR			TG	OSR2				LIN54	RUVBL2			CHCHD10	MALAT1			PBX3	MIR600HG
				AHNAK2	SH3TC2			SOWAHB	USF2			ALB	TMEM189				BRI3BP	PGM2			CBX1	FKBP7			FN3KRP	POLG2
				GAS7	FRG1B			PLXNB3	ZBTB17			LOC101928068	ABCB6				TRIM47	MICB			HSPBP1	RPL14			TIA1	GPR137B
				PLCL2	RC3H2			CEACAM6	CRLF1			FAM92B	LOC729739				RTCB	PSPC1			FAM98B	PRIMPOL			EZR	TEK
				GLRX	MID2			TGFBI	DUSP8			PRODH	METRN				SH2D4A	ITPRIP			CDK2	UGGT2			PDE12	F12
				COL4A5	TRAPPC6B			CCNG2	ZDHHC16			PAK6	PPAPDC1A				RNMTL1	AP2A1			CBX2	NPR2			MNAT1	SEMA3D
				ZDBF2	GAREM			CPEB4	LHX1			ZDHHC11	ARL4D				CAND1	ATG4B			CPSF3	LOC102800310			HNRNPUL2	RAB42
				COL27A1	RHOQ			PLXNA2	GOLGA7			INPP5D	TRIB3				NAP1L4	EEF1A2			NUP62	RHBG			RUSC1	TMEM133
				BDNF	GTF3A			ZNF185	TMEM120A			REN	ADAT3				SPATA33	TPBG			PPM1G	PRSS36			SFXN3	C1orf110
				VAMP8	MAX			S1PR3	LOXL2			TRPV1	IGFBP4				TYRO3	RRN3			DAZAP1	MGC27345			METTL1	CORO1A
				SSH1	RPARP-AS1			ITGAM	MARVELD3			GAL3ST4	BDNF				BOP1	ANAPC2			WDR34	NPIPB5			MUS81	CCDC125
				ZBTB11-AS1	SFT2D3			MXD4	YBEY			ADIRF	NFKB2				TAF6L	TBC1D15			MAPK9	PPP1R26-AS1			CENPJ	ZNF285
				TOB1	PRMT6			DSEL	MED18			SLC25A30-AS1	PRX				BRPF3	UBA1			RRP1	LTB4R			PKN3	ZNF613
				LYRM5	GAS5			RAB37	DYNLT1			AP3B2	LDB1				U2AF2	PRPF38B			JADE2	DLG4			THRB	BMPER
				SH3TC1	L3HYPDH			CNTD2	GMIP			LINC00167	EBF4				ORC3	C12orf4			BMP4	ASB3			AFAP1L1	SPATA6
				SOCS4	TIMM8B			MXD1	KRT86			MYT1	WASH1				UBQLN1	SREBF1			INTS10	VAMP1			INTS7	SLC27A6
				ALOX12P2	FAM96A			ZFYVE1	ABCG1			RALGDS	LETM1				U2SURP	CAT			PHF5A	SGK494			MET	LINC00641
				UCA1	CHCHD7			RASAL1	GTF2H5			THUMPD3-AS1	DGKZ				THOP1	POU2F1			PIGU	KCNQ1OT1			MBTPS2	PLEKHA4
				LINC01270	LINC01184			BCL2L1	ADCY5			LOC101927755	LINC01111				MEX3D	MARS			C9orf114	KCTD21-AS1			PTAR1	TBC1D3P1-DHX40P1
				ASS1	FAM86C1			LCE1F	FAM46B			KAZN	LINC00152				TUBGCP4	EEFSEC			POP7	DND1			GLT8D1	MAGEE1
				HMGA2	NUTM2A-AS1			CBLN3	ZMAT5			CMBL	LLPH				NUP88	CWC22			GADD45GIP1	RPL21			PLEKHA5	TMEM53
				HOXB13	KIAA1191			IL18	FBXW11			KCNQ1OT1	FBXW5				EML4	IDH1			PAFAH1B3	LIME1			PDK2	ZNF467
				C10orf54	NOTCH2NL			TGM2	N4BP3			LOC101060091	VSTM2L				ACTR3	FAAH			ITPR3	MARC2			CHUK	SYT13
				TSPAN31	PTPN4			LOC100862671	PEX13			CSF2RB	TFE3				NXF1	PIAS1			RTN3	BTN2A3P			C3orf38	EGF
				SAT1	PHACTR2			SOX9	MYD88			FAM196A	NDUFA3				NUP50	DHX16			SIN3A	ESYT3			CLMN	RAB36
				ARID5B	RNF41			STAT4	SYT12			ESPN	TIMM8B				LOC644961	VPS45			PLXDC2	MIRLET7BHG			QSER1	GALNT3
				FAM78A	HOMER1			SERPINA1	TAOK3			VAMP1	RPL35A				KLHL21	PANK4			MLH1	FAM132B			DNAL1	IPO5P1
				C1RL	MYEOV2			PLD1	SYTL5			CLDN4	LINC00839				FGFR1	CCDC22			SNRPA	NPFF			SMARCC2	LRRC4B
				CHST6	TPM3P9			MOSPD1	TMEM164			RAB44	ITPK1				TOMM40	PGD			C11orf84	SEMA6A			BAIAP2-AS1	DYNC2LI1
				LINC00674	ANAPC13			UNC5B	IFI6			LOC730183	TMEM134				KATNA1	ZNF316			CCDC34	LOC100506472			FAM105A	MDH1B
				MARVELD1	LINC00493			RETSAT	EFCAB14			GRIN2C	TRIM52-AS1				RBM22	PPP1R18			TBRG4	ISL2			POGK	LOC728819
				ZNF791	TRIQK			TPRXL	HSCB			APC2	EMC6				RBM25	ACADVL			PPP5C	SNORD4A			MUTYH	DPYSL5
				PRKAG2	C3orf33			HIST2H2BE	FBXW5			STAC3	PCYT1A				YWHAH	BSG			RDH11	STRIP2			SSRP1	TFCP2L1
				EOMES	DLX4			MGLL	SEC11C			PRR34	PDLIM4				FUBP1	P4HA2			AASDHPPT	LOC728819			N4BP3	STK33
				SYNJ2BP	PLA2G12A			KCNN1	ANAPC13			DNAH17	NAA60				RUSC1	LETM1			NPRL2	ATF7IP2			EBAG9	SLC27A3
				TSC22D1	LOC646762			CDH26	CDC42EP1			LHX4	GNAZ				RNF219	ATP1A3			WBP11	HSD17B6			GNB4	SLC43A1
				RNF144B	TMEM242			DYRK1B	RAB11FIP4			LAMB2P1	RAB40C				SNRPB	ZDHHC13			CHD4	HTR6			RNF214	AGAP2
				CCNG2	ARL5A			ESPNP	SLC39A11			NKPD1	OXLD1				CCDC109B	BRD1			RBM25	RANGRF			SARS2	ZSCAN16
				SAT2	ZNF320			SERHL2	YIPF2			GRIA1	HIST1H2AC				CNOT10	UBB			TEX264	HIST1H4C			TCHP	GDPD1
				GLTP	ADORA2B			ELFN2	PPP1R18			NOTCH1	UBXN6				ILF3	CTDP1			SLC1A5	LRRC4B			PKP2	NMNAT3
				ZNF600	LSM10			RNF39	IGFBP3			PAN3-AS1	GRAMD4				NCBP1	CYP51A1			LRRC42	ANKRD30BL			LYPD6B	NACAD
				TINCR	SLC35D2			C17orf103	C12orf49			LAT2	TSPAN4				DDX1	PNKP			CHERP	RPL31P11			DBF4B	ADORA1
				SEMA3F	RNF125			DUSP4	GPSM1			TFEC	FAM89A				SAAL1	TADA1			CS	LOC284454			NFS1	TMEM67
				ADIRF	ANKIB1			RASD1	C16orf58			TMEM200B	PREB				ILK	HSP90B1			PPP1R16A	PRRT2			NRM	SOSTDC1
				FOXO4	LOC100129361			ARHGEF37	CALM2			LINC00565	NTF3				GSTCD	ALDOA			KCTD3	SNAR-E			RAPH1	LRCH2
				UFM1	ZNF271			ADORA2B	EPHA1			DCST2	EHD4				RBM10	SLCO4A1			SEPHS1	NEIL1			BCL2	GPR183
				LINC00909	SHPRH			UBASH3B	CYB561D1			MUC20	IFI27				SCAF1	MVD			HNRNPH3	PAX5			MAVS	IQCC
				EMR2	ATG4A			SERPINF1	RALBP1			CACNA1E	SLC9A3R2				CKAP4	MVK			ENOPH1	GOLGA8A			MAGI3	HPDL
				METTL8	RNF5P1			GRIK5	FAM96B			KIAA1324	GNB1L				PARPBP	LSS			NIF3L1	RPS28			PTPMT1	SLC29A2
				WIPI1	RWDD2B			RALGDS	ATP6V0E1			PVT1	MAP1LC3A				PLEKHO1	RBM28			SEH1L	ZBTB8B			VSNL1	EFCAB7
				RSG1	RNF170			LBX2	FAM219B			C19orf38	C1QL1				GDI2	CPVL			MRPL37	ACACB			ALKBH2	C8orf48
				ALOX12B	RNF182			SMAD5	LFNG			PCBP1-AS1	H2AFJ				SNRPA	ARHGEF1			CYCS	SNHG4			AAED1
				SYT17	TM2D1			POU2F3	TSPAN15			LOC100289361	PLCL2				DAG1	SERPINB9			SLC25A4	ZNF711			SEH1L
				TAP1	FAM171B			CDSN	MSRB1			ADCK3	ID1				RBM15	PIGU			GIGYF1	HIST1H4J			CAND1
				PRRG1	LAMTOR5			CEMIP	STK35			LOC100289230	MARCH2				ATL3	AIFM1			CTXN1	TGFBR3L			VPRBP
				OLFM2	UQCRHL			KITLG	ATXN7L3			LGALS12	C16orf13				HNRNPA1	HADH			TSEN54	SNORA6			MOGS
				ABAT	C1orf50			KCNK3	ATP1B1			LOC400553	SNHG17				PRKAR2B	SPAG9			PSMC3	YBX1			BRD3
				OBFC1	CRIPT			INPP1	PPP2R5E			ITGAM	ZNF593				EIF2S1	PI4KA			CLPP	WNT5B			TRPT1
				ARRB1	OST4			MCC	SAMD4B			BZRAP1-AS1	ZP3				HP1BP3	ADD1			PTGES3	NKD1			ATP8B1
				CTIF	BAG1			TINAGL1	SGSM3			ILF3-AS1	DUSP4				CUL1	YBX1			CCT8	DOC2A			TACC3
				ZFP90	LYRM1			MYPN	ESRRA			EPHB3	NKX3-1				GALNT14	CENPT			ENOSF1	NPHP3			LRRC42
				MAPK13	SIM2			CDC42EP3	RAPGEF1			MTTP	CAPN15				KAT5	BAI2			GANAB	MT1F			USP25
				ZNF397	PEX26			FAM83A	COPS7A			GBX2	EIF1AD				EIF5B	MED16			FLJ22184	RPL36A			E2F1
				LPIN3	SNHG5			TES	ARHGAP21			C11orf71	RHBDD2				DARS	CASP3			ASUN				ZCCHC10
				PCMTD1	C5orf24			SNX29	NCKAP5L			DNAH12	AES				RANBP3	ACSL1			C1orf56				ATIC
				LINC00963	SHFM1			IER5	SH3KBP1			TNFRSF10A	ATP5E				PTCD3	KLHL26			DERA				LYRM7
				OSBPL5	ZNF32			ESPN	MEIS3			CD22	CITED4				LONP1	XRCC6			NUDT1				LEO1
				BTG1	RBM18			PNRC1	GTF3C6			SRL	SNHG7				USP13	PDLIM3			TMA16				R3HDM1
				FAM84B	TIRAP			LINC00936	EVI5L			FAM186B	C19orf60				AP3M2	RCCD1			MRPL19				UCHL5
				DSE	DEXI			YPEL2	TMEM189			SLC13A1	LOC54944				WDR53	LPCAT2			ASXL1				POLR1B
				RBM20	ZNF480			TMEM40	PEX11A			WNT7A	UBE2J2				NUP153	GBA			NKAIN1				STYX
				FCGBP	CBWD1			WDR63	MARVELD1			LOC100287036	DEDD2				COLGALT1	LGALS3BP			SNRPF				EXOSC2
				SEC14L4	COA4			LHFPL2	TMEM9B			RGS12	C10orf54				PLEKHG3	SRP54			HSPA1A				LUM
				WIPF3	SYNGAP1			FBXO32	HTATIP2			LOC338694	MFSD12				PMP22	FZD1			C1GALT1C1				DUS2
				STX6	PAQR5			NGFR	DYRK2			SMG7-AS1	SLC25A39				CCT3	SMYD4			ARHGAP39				FAM64A
				DYNLL1-AS1	CAV2			HEG1	SPRED2			TGM4	TANGO2				PHRF1	ANAPC4			NME3				PLEKHO1
				NAPB	XPR1			SIRT2	PNPLA6			ENKUR	EGFL7				RCC1	ATP6V0A2			RBMX				TCEA1
				LINC00294	SRRD			CACNG8	RAB24			FAM43A	PPAN				ABCE1	S1PR5			ADSS				KIF7
				PPP1R3B	S100A13			SERPINB8	MESDC1			C11orf91	FJX1				NUDC	LRP11			SRSF3				FAM98A
				ZBTB38	LINC00857			ABAT	SETD7			FAM132A	C11orf95				ATRIP	IMMT			BNIP1				PARP9
				IKZF5	RNASEH1-AS1			DUSP10	ZBTB7A			ABTB2	ARHGDIB				NUP155	LAMP2			STIP1				FGF13
				SIDT2	CMTM7			GEM	RABIF			RAG1	ANAPC11				HNRNPDL	CDK11A			U2AF2				NCKAP1
				LPAR5	BLOC1S6			ANXA1	CMTM6			SNAI3	NCLN				CCT4	PLEKHH3			TOMM6				HARS2
				DOCK3	SZRD1			WFDC2	BLOC1S3			SYNE4	FLRT2				FOXRED2	NPNT			PPP2R1B				AGTPBP1
				FAM214B	C9orf41			JAG1	UQCR11			GRIP2	WASH3P				MFI2	HLTF			LTV1				BTN2A2
				MBD5	TMTC2			AMZ2	MBD4			LAMC2	HBEGF				SEPT3	SORT1			FIP1L1				RGS19
				ATXN7L1	LOC148413			LOC100130899	BCAS4			KRT79	ZNF703				SMARCA4	KLHL25			CKS2				FANCI
				SHANK2	HDDC3			MMP28	ADAP1			TAC3	HES1				PSMD12	HGS			MRPL24				SIMC1
				C19orf83	LRRC75A-AS1			MKNK2	TMEM184B			CDA	CALM3				SRSF6	SLC6A17			MBNL1				KIAA1143
				ACP6	PACRGL			GALNT11	HR			LINC00622	DPP7				PAK6	SMU1			NUP98				DNAAF2
				SLC35E2B	LYSMD2			NOS3	ADA			SSUH2	TCP11L1				CCT6A	INF2			HNRNPM				LINC01184
				ZNF587	ZFAS1			KIFC3	JOSD2			PRAM1	C9orf69				HNRNPA3	AP1B1			BAHCC1				NFIL3
				BRMS1L	PLEKHA3			S100A6	AKIRIN1			PSORS1C1	PXN				CEP85	RSBN1L			PAGR1				MDFIC
				LINC00476	SNHG1			EREG	EHD1			LRRC4C	DECR2				RAPH1	ACIN1			ADSL				TTI1
				SLC25A15	AMN1			PLCD3	PRRC1			SLC1A7	ATP5D				CDC27	DUSP9			PQBP1				DHX36
				CHMP1B	TIMM10B			CD24	CCDC64B			SEZ6	EPHX1				TCHP	EDC4			FARSA				TPMT
				KAZN	WDR35			GCNT3	SCAMP2			LOC729987	CDK2AP2				C11orf84	FZR1			NDUFB10				GTPBP10
				C11orf45	CBWD6			KLK8	ATP9A			SMOX	TRAPPC5				EXOSC10	SAFB2			PRELID1				KIAA1467
				SHC1	EHBP1			TTYH3	CDYL			C12orf45	ATG4D				MFSD2A	CEP89			NCAPD2				HACE1
				TMEM184C	CCDC69			LIMA1	DAXX			LOC101927740	TBX2				NAA15	CTNNBL1			HMGN3				ACD
				FUCA1	PSD3			IFIT2	INF2			ASB15	ATF4				MGME1	CALML4			PUF60				KDM3A
				ABHD4	MYC			OPN3	FEM1A			OSGIN1	SCARF2				TCTN2	GDA			DUS3L				NETO2
				WBSCR27	TEAD2			GDPD5	MUS81			MAMDC4	PFN1				RAE1	NSUN5			TARS2				FAM102B
				MGST2	PEX2			SAT1	VAV2			EID3	NDUFA4				SRSF7	WDR18			FOXRED1				MBD4
				POLD4	SSFA2			FAM183A	SPHK1			GS1-259H13.2	RHOG				GSPT1	NOTUM			TUT1				LPCAT4
				TBCK	TTC39A			SEC14L2	SLC9A3R1			CHAC1	NSMF				RNF26	INTS1			SRSF4				FEN1
				IL17RD	CD163L1			LINC00842	BRK1			C6orf226	C19orf54				DDX23	KHDRBS3			MRPS6				SMAD9
				YBX3P1	FAM86EP			LY6G6C	KCNK15			PODNL1	VPS28				EHMT2	GLUD2			DDX56				RPE
				ARHGEF3	BCAS4			SORCS2	BCAM			FAM131B	SDC1				SKP2	GPI			WDR75				SNAPC2
				PPARA	CELSR3			ID3	GPR108			CTC-338M12.4	ESRRA				ZNF143	OSBPL11			CCDC86				METAP1
				TUSC2	MFSD9			ALS2CL	TMEM132A			LINC00842	TMEM261				C1orf21	HIP1			HSPA14				ARID2
				ATG2B	DAP			PSMG3-AS1	PTTG1IP			LGR6	SMAD3				CASP2	PCSK9			EBNA1BP2				PLRG1
				WWP1	SEC11C			KRT32	WBP1L			PYGM	NME1				EFTUD2	KRT8			C16orf91				ARHGEF40
				BTN3A2	SH2D5			DNAJB2	UBALD1			C7orf61	HIST2H2AC				SLC39A8	NPAT			AAAS				SGCE
				SLFN5	BCL2L2			RGS12	AREG			AMZ1	WAC-AS1				MBD3	COG4			STT3A				TMEM106C
				ZNF224	EMB			S100A4	HLA-E			LOC100133445	TRIM16L				TTF2	ZNF326			DYNC1LI1				MEX3A
				SLC29A3	CBWD5			C1orf116	ESRP2			ISLR2	ZNF777				NOL11	GFI1			YRDC				MAT2B
				MYPOP	LINC00116			UBE2H	SCCPDH			EGR1	FAM58A				GJC1	TAF1A			SHQ1				H1FX
				SYTL2	HKR1			KSR1	CERS2			SPINT2	LZTS1				ANXA5	TBL3			ZDHHC6				MTR
				BSDC1	TMEM128			EPPK1	TMEM50A			FAM13C	PQLC1				NIF3L1	TFAP4			WDR3				DIAPH3
				DSC3	LINC00839			SNCAIP	UBXN6			LINC00672	C5orf46				TOE1	PRPF3			ALKBH2				DDX11
				MR1	RND3			GPR115	RNF121			DICER1-AS1	MANF				SNW1	PLOD1			GPN3				MFN1
				RNF43	COX6C			PLEKHF1	SPRYD3			RAB33A	TMEM80				SHMT2	PDIA3			EML3				ZC3H10
				RFNG	ERCC8			KLF7	C9orf69			DLGAP1-AS2	LAMTOR2				HNRNPH3	SRRM1			BAZ1B				TMEM19
				ST6GAL1	RILP			C9orf66	NAGK			HIST1H2BO	PDZD8				SRSF10	ATP2C2			CLASRP				TMEM194B
				MFSD3	ZNF286A			FBXO2	TUBB3			RNF19B	A4GALT				CNTRL	CDK5RAP1			POLR1A				PIGH
				EPM2AIP1	RPL41			TGFA	TSC22D4			MSX2	MICB				STT3A	FBXO21			ITPK1				CCDC18
				ATXN7L3B	KIAA2026			FAM49A	TPM4			TFAP2A-AS1	ZC3H3				HTATSF1	TGFB1I1			NANS				ADSL
				MBNL2	VTI1B			HTRA4	NDUFA1			LOC442132	ID3				NCOA5	EAF2			SCO1				PLIN2
				MAP3K12	OAZ2			GAN	TRIB3			UBTD1	ALG2				HNRNPL	TMEM187			NKRF				DMAP1
				MCC	CCNYL1			FAM214A	GNAS			CACNG6	ZDHHC8				WBP11	ILVBL			P2RX4				TOR1AIP1
				MFAP3L	CXorf40A			LIMK2	SSR1			LOC284837	CSRNP2				RAD1	AARS			TMX2				ANKRD26
				KIAA1462	SMIM20			RAB27B	KIAA0930			RNF152	PROSER2				HNRNPA0	USP43			DIAPH1				MED30
				FKBP14	UBE2F			PHLDA1	NRBP1			DDN	HIST1H2BD				AGPAT2	GTF2IRD1			GLRX5				JAZF1
				SNX29	SLC18B1			PMEPA1	MAP7D1			SNHG21	GABARAPL1				DDX24	XAB2			PPA1				COMMD3
				LOC100506469	COBL			ATXN1	EMP2			AVIL	AJUBA				RPP25	SOAT1			AGPAT5				POLA2
				GRAMD3	ZNF558			TMCC3				LRRTM2	TPD52L2				EXOSC8	PKM			KDELR3				EIF4E
				LAMC3	OGFRL1			PSD3				ARHGAP25	SRM				ABCD3	LEPREL2			TCP1				KIAA1468
				KITLG	NUS1			EFNB1				HIST1H2AK	TSNARE1				UTP6	RTEL1			PRRC2A				HCFC2
				DFNB31	COX16			PDCD4-AS1				LRRC37A11P	RNF187				NCAPD2	VASN			PECR				IFFO1
				ZNF385A	TBC1D14			PLAU				TCP10L	SH3PXD2A				GGA2	FANCL			PHGDH				GPANK1
				SZT2	SNHG12			PAPLN				PPP1R15A	JOSD2				CDC25B	CDKN2D			UBA2				C12orf4
				ARVCF	GTF3C6			SASH1				AEBP1	NICN1				SFPQ	PDHA1			EIF5A				MAP3K6
				DBNDD1	ISCA1			GAREM				KCNB1	CLPB				PDS5B	BTD			DIMT1				DZIP1L
				PLEKHM3	SCOC			KDM4B				SPTY2D1-AS1	RASSF4				GMPPB	SGCE			CEBPZ				ANAPC7
				HMGN4	PAX8-AS1			FAM227B				CHD5	HSF1				HES4	TTI2			ORC5				NNT
				APBB2	ADPRHL1			GUCA1B				SLC9A1	WWC1				SETD8	ALDH9A1			CDH24				GMPR
				ELFN1-AS1	RILPL2			TRIM16				RYR1	TRMT61A				CDC23	SLC27A2			SLC45A4				MCMBP
				STARD9	CDC14B			REEP2				RHCE	MZT2A				ATAD3C	FARP1			DDX42				FAM83D
				TMEM8B	IFT43			TMEM99				LOC101927691	WNT5B				CABLES2	TAOK2			USP39				TMEM220
				CMTM4	C1orf43			HIC1				ZNRF3-AS1	SPHK1				RHOBTB2	RNH1			HMCES				ACTL6A
				ADM2	PABPC3			FXYD3				MMP25	HMOX1				PUF60	IRF7			LEO1				MLLT6
				ZSCAN2	DNAJC24			STC1				ATP2A1	MRPL14				ZWILCH	REEP4			TACC1				PPP2R3C
				MMP24-AS1	SYBU			MVP				MAB21L2	FBXL12				PSMC3	PDIA3P1			TSPAN3				TUBGCP3
				NFAT5	MUC3A			SCAMP1-AS1				TSGA10	RUNX3				RFX2	CLSTN1			ATP13A1				CRNKL1
				TMEM68	PPM1H			FOSL2				TLL2	TPI1P3				SIVA1	PGK1			GSTO1				GMPS
				PLEKHF1	LYRM7			ACKR2				WDR81	FBXO31				RHNO1	OAT			MRPL18				TTC28
				CCDC71L	IMPACT			OLFML3				FER1L4	SERINC2				FAM178A	H2AFY2			ENO2				COQ5
				GJB3	KLHL29			RABGGTA				RUNDC3A	MLEC				PYGB	APLP2			FAM86A				NOL11
				PGBD2	SLC25A23			UCP2				DNHD1	TOR1A				TRA2B	HSPB1			PRPF38B				PAF1
				BRWD3	C19orf12			ABHD4				MAFA	PPP1R9B				NUP43	FSCN1			FAM155B				IBTK
				IFT20	ZNF761			CALCOCO1				CELF5	TP53				SLC30A3	AP3D1			GTPBP4				SLC38A2
				CPEB4	FAM174A			KIF3C				C8orf44	NDUFAF3				G3BP1	NELFA			ZC3H18				TARS2
				MKNK2	RAB28			SEMA3B				TENM4	PDAP1				SF1	SQLE			AFG3L2				SKIV2L2
				ZSCAN30	RHOF			KLF6				APOBEC3C	TRAPPC1				OXCT1	STOX1			FGFR1				APC
				RAB5B	TMEM136			SLC8A1				POLN	BCL7C				UBALD2	HSF2			ARMC6				MND1
				PCMTD2	KLHDC8B			KRT13				STAM-AS1	OLR1				HSPA9	TUBB4A			LOC341056				CASP2
				DUSP16	PCTP			CAV1				MYO16	RNF10				DCLRE1A	LIME1			AAMP				ENOPH1
				KIAA1217	BOLA3			NUP50-AS1				SLCO2B1	FAM53C				MTERFD1	C1orf35			PFKM				PIF1
				PIK3CD	SH3RF1			LOXL1				MXD4	TNFAIP2				FGFR3	DNM2			ANP32A				ARHGEF26
				TMEM134	TMEM167B			KLF9				MAP2K3	CYTH3				RRP1	GUSB			C21orf59				TCF19
				UNC13B	RAP2A			ADAMTS13				SERTAD1	RAB35				HDAC2	TMEM81			EFTUD2				ZFYVE19
				CAV1	ZNF780A			EPS8L1				VEGFA	EPN1				HSPA4	PRKCDBP			MAP1S				NUP37
				MTFR1L	S100A4			PHLDB3				USH1G	PASK				NOLC1	SDHA			SNX5				SERPINB9
				CYP4F11	UBL5			TSPAN31				FOSB	HLX				CKAP5	CENPP			IGSF8				GNE
				ATM	TYW3			PTK7				CES2	ZGPAT				CPSF6	EEPD1			TBL1X				PTPDC1
				VCAN	RSAD1			CD59				SPTBN5	SLC35C1				DYNC1LI1	ANKHD1-EIF4EBP3			TCEB3				CBX2
				PDCD4	FXN			ZDHHC7				GGT1	FAM195B				ZW10	NUDT1			ECI2				PJA1
				KLK8	ATOX1			C20orf196				LOC101927780	SDF2L1				STMN1	LUC7L3			SNRPD3				ZWILCH
				NUDT16	SNHG16			CAPN13				LINC00592	LDOC1				SMCHD1	GLUD1			TSN				RARG
				STARD10	TTC3			KLK6				SAA2	SLC35B1				ABCF1	MUTYH			NOM1				CEP192
				GALNT11	GAS6			ETV7				RGS16	COMMD5				NONO	CNTLN			SHPK				GAS8
				MON2	FAM89A			TMEM8B				SEMA4A	HOXC9				HNRNPR	COL6A2			SENP3				RUNDC1
				CYB561D1	TANK			LOC101927204				TOB1	NOSIP				TUBB2A	EDARADD			PIH1D1				PARP8
				RSPH3	JARID2			RIBC1				C14orf182	CCDC12				SNRNP40	ENO2			NPM1				DMTF1
				PTP4A3	VSNL1			LAMC2				PYY	C10orf2				DDX18	HOOK1			ERLIN1				METTL2A
				ZNF440	MAPKAPK5-AS1			RNF223				CCR3	ZFP36L2				SIK2	LUC7L2			WDR5				PRMT5
				GJA3	C16orf45			HIPK3				PTOV1-AS1	DTX2				PRPF19	RNF40			ARL6IP1				ILDR2
				SLC43A2	PRSS3			MBD5				KDR	GSK3A				FDPS	IDH2			RRP15				TRIM65
				PDGFA	WSB2			CD44				SRXN1	RPUSD1				DDX3X	OVOL2			ATP6V0A2				NKX2-2
				MAP3K10	VAMP2			TSC22D3				CLIC5	MGAT1				HYLS1	B3GALTL			U2AF1				SMYD2
				C2orf68	TASP1			HSPG2				HTR3C	PINX1				THOC1	POR			CHCHD6				CTNS
				PHYKPL	RIN3			LYRM9				SNHG9	WDR5				VPS35	NHLRC3			C12orf57				THAP9-AS1
				PSD4	DYRK4			KAZN				ADM2	PI4KB				TBC1D10B	CLIC3			ACP2				PRKACB
				GRAMD2	RNF141			MIB2				WAS	BOK				HEATR2	ASNS			EPCAM				PBDC1
				ASIC1	ADRBK2			PTPRE				TRIM67	CHCHD10				NFYB	NUDT8			CHORDC1				NIF3L1
				FBXO41	SPIRE1			DEPTOR				LOC646903	CDKN2B				NEDD4	NXPH4			EIF4E				NUP88
				MRAS	BLOC1S4			FA2H				CPLX1	PRKAB2				SRSF11	ZNF775			ALG8				COPS4
				MSI2	TMSB4X			GPRC5A				RGS20	IL27RA				TUBG1	FDFT1			SLC39A6				MCM5
				ADCK3	PABPC1			FAM171A1				LOC100652758	HGS				CCAR2	CACNA2D2			PTPN18				WDFY1
				ZNF276	ADA			PVRL4				FLJ32255	APRT				LDHA	FAM161A			CCT3				ELF2
				PTPRM	PSPH			TRIB2				EVPL	PRKACA				FH	CCT7			UBTF				UHRF1
				PROCR	FAM172A			RND3				SLC9A3R1	RNASEH2C				ELOVL5	FAM81A			SNRNP200				RAPGEF6
				ARMCX6	UHMK1			KRT23				CMKLR1	ARHGEF16				CTDSPL2	ALDH16A1			PINX1				KIF22
				MVB12B	PPP1R14C			SLC12A6				OBSCN	NMT1				CCDC18	TUBD1			FGFRL1				CPM
				CCDC57	TTPAL			SMOX				ZBTB37	LOC407835				WDR34	ASRGL1			EIF4A3				CEP85
				ELL2	FAM96B			SLC35F6				GABBR2	C11orf31				PKNOX1	ZNF230			HMGB3				PDSS2
				LOC642852	ACN9			WISP2				C15orf56	TGFBR3				COMMD4	DHCR7			EML4				TRIP4
				TBC1D17	ZSCAN32			LOC286437				SNHG3	NFKBIA				NOP58	PLCB3			UTP6				SLC12A2
				NCKAP5L	CYB5D1			TRAK1				ACYP2	HMX1				FANCE	HNRNPK			DLAT				CARD6
				HOXB6	LRRC8B			TNFAIP2				FOSL2	NPTX2				CHRNA5	IGFLR1			MRPS27				CDCA8
				LATS2	VHL			RNF19A				ARHGEF37	NMT2				TMEM97	PTTG2			GDAP1				USP54
				ASPHD1	CCNI			BCL10				CAPN10-AS1	RAI1				CDCA7L	GATA6			TUBG1				INTS8
				TMEM159	MAPK6			FYN				SDK2	ZNF579				PCBP1	DVL2			EDC4				OXCT1
				PLAU	ARL2BP			RHOC				ITPKC	PCED1A				GTF2F1	C16orf93			CDC123				OGG1
				SLC37A1	HS3ST1			PPP1R14C				HSPB8	PPIF				COPS3	TLX3			PAQR4				MCM7
				PSMD5-AS1	C6orf48			DSP				PLCD3	REEP4				KCNK5	RHEBL1			LAP3				SAAL1
				CENPBD1P1	B4GALT2			PNPLA4				BLCAP	BCAR1				LRRC20	S100PBP			WDR46				DENND5B
				NTN1	LDLRAD3			CSGALNACT1				TLCD2	GPR176				STAU1	MSANTD2			TFAM				GTF2A1
				BAK1	PTEN			ULK1				SEC14L5	BRD2				CAP1	USP11			HSP90AB1				KIF5C
				CCDC120	NSMF			RAP2C-AS1				AKR1B10	MTSS1L				SLC44A2	CHD5			CDK10				LOC730101
				SLC35D1	ANAPC16			KCNG1				RASL11A	TMEM156				RDX	SLC3A2			TSEN34				NAA40
				TFDP2	RNF14			LINC00346				FLT3	CAV1				KIF26A	FXYD6			CTU2				TUBGCP5
				NUDT18	GNA12			GPR78				DUSP14	RNASEH1				NUP35	DZIP1L			KIAA1467				C21orf59
				ZNF75D	HTR7			RAB5B				SLC2A12	NME2				ANP32B	USP5			CHD1				MRPS27
				TMOD2	MYCBP2			MYEOV				CDC42EP2	TBC1D13				FHL1	TXNDC16			MRPS12				CAMK2D
				MRVI1	SMUG1			IGF1R				CHST8	AURKAIP1				HCFC1	SNRNP70			GEMIN2				SIX5
				MBP	RASSF3			MAPK13				TNFRSF13B	STX4				ING1	LOC401010			RAD1				MTHFD1
				AK1	ST6GALNAC4			TAX1BP3				LOC101928674	CSK				GPX8	PMM1			RTKN				MAP3K5
				MGC57346	TSPAN17			BAG1				SYP	SPSB2				EPCAM	BAG3			DDX20				MLLT10
				MTHFR	REXO2			KCNK6				C17orf103	NDEL1				PACSIN2	AKR1E2			NUFIP1				CCDC61
				IFNAR1	IBTK			ABHD2				SLC51B	TRPM2				SCAMP4	BRAT1			XRCC6				CRLF3
				PTCH1	PLEKHA1			ARL15				LINC00472	NISCH				PELP1	ENO1			GLOD4				GPR126
				SLC27A1	ZNF664			ARVCF				PARD6G	RBM42				SSX2IP	COCH			EWSR1				ATP2B1
				SRMS	CPA4			DSE				KRT42P	LUC7L				CHERP	REEP1			AHRR				C4orf33
				SLC25A30	ASAH1			LRP10				MAFK	CSNK1E				CCNE1	ANXA6			SRSF10				EN1
				RASAL1	KLF3			LOC102724550				ZFAND2A	LBH				CSE1L	MNX1			RPS19BP1				BTBD9
				AGBL5	DUSP3			AMZ2P1				HS6ST1	KCNN4				PNN	RASSF7			PNP				MAGEH1
				SLC24A1	SERTAD2			ZNF365				COL27A1	ARHGEF17				SMC6	SLC27A3			SMYD4				ACTR6
				RNF135	ZFP36L1			KHNYN				ASCL5	AMBRA1				HSD17B11	GNB1L			PPRC1				UBXN8
				LRP10	BECN1			UBTD1				ZNF843	KEAP1				ADCK2	ALDOC			HSP90B1				PLSCR1
				DUSP11	OTUD6B			YPEL5				ARL4C	UPP1				HNRNPU	FBLN1			RPP30				LCMT1
				REEP2	RAB25			PLLP				NUAK2	FADD				FERMT2	C1QL1			MRPL12				SPATA2L
				ZNF226	ZFAND6			UBAC2-AS1				FAM222A	AMMECR1L				CACYBP	KHDRBS1			BRAT1				SLC38A9
				S100A11	GDE1			DHRS2				MAX	WDR4				UBTF	KLHL22			FZD4				IPO9
				PTPRU	NDST1			BTG1				STXBP5-AS1	TSEN54				POC5	BANP			MRPL35				SLC39A8
				EREG	MAPKAP1			DCLK1				SH2B2	GMEB2				LRRC8C	EGR1			HMGN2				ATP1B1
				RABL2B	DMKN			FAM129B				C8G	HAPLN3				FKBP4	SYTL4			SMARCA5				MTAP
				TMEM52	FRMD5			ARRDC4				KRT8	PEX16				DTYMK	HNRNPU-AS1			SLC25A11				NDUFS1
				UBE2H	KIF3B			SLC43A2				SPSB1	RPS8				BRCA2	ZBED8			HSD3B7				CCDC8
				TSPAN1	RPRD1A			SEMA7A				C19orf26	TPRN				GINS4	HDGFRP2			TIMM23				TRIM68
				UNC5B	ERRFI1			GOLGA7B				ERICH5	C14orf119				GGH	CASKIN2			ANAPC7				RBMX
				NABP1				MUCL1				APOL4	RPL27				PGP	FAM132B			C16orf80				PRKRA
				PPFIBP1				C14orf28				STX1B	PTRF				BUD13	TCIRG1			RUSC1				ALDH18A1
				RNF185				DUSP3				MTRNR2L1	IMP4				HAUS7	ZNF703			AHCTF1				TENC1
				FAM83F				BEX4				FSCN2					RELT	AMH			PMM1				MASTL
				B3GNT7				TBC1D2				ARRDC4					JMJD6	LRRC46			SNHG17				ITPKA
				ZNF195				MAPRE3				NUDT9P1					USP7	PRR24			TRAPPC4				MXD3
				MIR100HG				VAMP8				NANOS3					RTN3	KHK			HAUS2				RMI1
				TPCN2				RALB				PKLR					FOXRED1	LOC100507002			HOXC9				C9orf64
				STYX				BDKRB2				LRRC37A3					DGCR8	FAM129A			TMEM109				RAB29
				RAB2B				C12orf76				ADORA2A-AS1					SFR1	AP4M1			AIF1L				PDK1
				TGFBR1				EPHA2				MISP					BAZ1B	ASMTL			CEP57				SMARCA1
				ZNF248				SEPT9				FLJ37035					INTS7	ITGA7			TSFM				SLC25A4
				ATP8B2				TRIP10				GDF9					AAAS	LOXL2			TCHP				VSTM4
				PRMT2				LHX6				TRIM69					SESTD1	TERT			CHDH				GINS2
				C9orf69				HIGD1A				SLC43A2					CHORDC1	TUBB2B			NOP14				UAP1L1
				C19orf66				CYB5D2				PPP1R3F					SYNE2	CSPG5			GEMIN6				SIRT5
				GNPTAB				SGK223				ZNF778					PRIMPOL	CLU			KRI1				GTPBP3
				CTNNBIP1				DNAH3				SYN1					SMCO4	ECM1			CCT6A				PLEK2
				ABCD4				TCP11L1				APOBR					CORO1C	FANCM			COMMD4				TGDS
				SOX12				PROCR				PLEKHF1					CEP41	CCDC9			POLE3				BCAP29
				TRNP1				CITED2				FAM102A					SF3B4	RBM14			CSPP1				BDH1
				GRAMD4				PERP				CARD14					EED	AHSA2			OGG1				PDS5B
				SPPL3				RHOV				KDM7A					DDX46	TMEM121			PIK3R4				CDH11
				JMY				AHDC1				SIK1					UGT8	SCML2			KIF1A				ERAL1
				TNIP1				NFATC4				TEX22					MFAP1	RDM1			USP37				CDC27
				RBL2				TSPAN1				RCSD1					LRR1	PLCE1			ANXA6				PARP1
				CFLAR				TINCR				CCDC13					TOP3A	OLFML2A			WDR18				COPS3
				GID4				ZFAT				UBALD1					HNRNPUL2	FOXD2-AS1			PCK2				RFX1
				FCHSD2				LINC01016				PHPT1					CPSF3	ANGPTL4			EIF2B5				ARL6IP6
				SPRYD4				RPH3AL				ABHD4					ZNF165	NES			RCN2				DLX1
				GPBP1L1				CHST3				PRCD					SAPCD2	GPAT2			WBSCR22				TTLL5
				MSX1				SDC4				WNK4					XRCC5	APOBEC3B			MRPS35				MKL2
				SNX21				SLC31A2				CREBRF					G2E3	SLC38A3			GNL3				CDKN2C
				PTPN13				SALL4				EPHA2					EWSR1	IRX3			TP53				PAK1
				MIR4697HG				TOM1L2				CNGB1					DEGS1	RNASE1			RBBP8				UBQLN2
				SLC4A3				RGS6				CEBPB					LOC150776	PALM3			TTC38				CD2AP
				TFE3				ABCA1				ANKDD1A					AGPAT9	LIG1			PFDN6				KATNA1
				MACC1				KIAA1462				ZNF596					HMCES	MALAT1			NAGA				TRO
				DHRS7				RBMS1				ACY3					TUBA1A	HAPLN3			NEIL2				OXR1
				ASB1				RNF144B				BRWD1-IT2					HNRNPF	LYPD6			GTF2H4				CBS
				EDEM2				KCTD1				CCR7					RBMX	DHRS2			UPF3B				GART
				KIAA1324L				PAPSS2				ZSWIM8-AS1					SYNCRIP	CXorf57			PTBP1				AGPAT9
				MID1IP1				TEF				ACAP1					ODF2	MPP1			DDX28				HUNK
				DOK4				PRICKLE2				C11orf96					ACTB	HSPA1A			GGCT				NUPL2
				TGIF1				PPP2R5B				RPL32P3					CEP78	RHBDL3			UCKL1				SCCPDH
				RFK				PRKCZ				PRKAB1					ILF2	LRRC26			TUBGCP4				ATL2
				CIPC				UBALD2				RARA					GEMIN4	FMNL3			MTR				DCTPP1
				MOSPD3				TRAFD1				KCNK7					CASP8AP2	C2CD4C			IMP4				TMEM209
				EVI5L				MRAS				SYNPO					RBBP4	IL22RA1			CCT2				FAM13A
				LMBR1L				CAV2				FAM219A					LOC81691	TUBA4B			KDM1A				C12orf43
				TLDC1				UNC13D				PTAFR					EMC3-AS1	SLC1A4			LRSAM1				SLC2A10
				TSPAN14				ALG1L				LOC100131691					HNRNPD	CEP152			DDX24				DBR1
				MOB3C				SHB				C12orf66					ITPKA	MAPK15			MYEF2				TEX30
				METRNL				RHOQ				TCTA					ACTG1	APOLD1			SERPINH1				CCDC66
				KDM4A				TMEM79				LOC101926963					RTN4R	CTSV			SLC19A2				ZCCHC8
				MFSD6				ATG4A				SP110					TMEM109	KANK2			ALMS1				ZNF559
				ITPRIPL2				SH3BP5				DKFZP434I0714					ZBTB14	SRR			USP5				MIF4GD
				LITAF				C1QTNF6				LOC100630918					SMPD4	SYCE2			DNAJC10				WRN
				MED13L				PPL				GOLGA7B					CENPN	DMBX1			ALG3				CEP41
				NOL3				FAM102A				CD79A					CCT2	DPYSL5			PDHA1				SMARCAD1
				RAB11FIP4				GLIPR2				SKAP1					PHLPP1	HSPA1B			SYNCRIP				CASP6
				MBTPS1				LACC1				LRRC32					DNAJB1	INSIG1			MAGOH				DTNBP1
				TRIOBP				GLUL				MCF2L					SUZ12	SIX2			NPY1R				USP53
				RAB3A				IGFBP4				SUGCT					EPB41L2	KISS1R			DCPS				BAG2
				ATXN3				CTNNBIP1				CEACAM19					DBF4B	HIST1H2BL			DCDC2				TMLHE
				PIKFYVE				CLDN1				MIDN					SCLT1				TCFL5				ABHD10
				C12orf45				IRF2BP2				PRKX					KPNB1				IARS2				DVL2
				PIK3R2				NPAS1				VWF					OIP5				REEP6				CDCA2
				CALD1				FBXL19-AS1				PSD2					KIF5B				SLC25A22				FANCE
				B4GALT7				TSC22D2				ZNF767P					DCLRE1B				MRPS34				RMND5B
				OAF				TFEB				KLHL36					NCL				GCDH				AUNIP
				GPR126				HS1BP3				SCNN1A					ZC3H18				SLC27A2				ORC1
				BTBD10				IFFO2				ARIH2OS					HNRNPH1				RPL39L				SMARCA5
				R3HDM2				P4HA2				TSC22D4					DLST				RFC1				KDELC1
				DGKQ				PRICKLE4				TIPARP-AS1					ABHD2				ELP5				UFSP2
				DKK1				C2orf76				LRP2BP					SLC19A1				NDUFAF4				BTF3L4
				BEX2				DUSP5				NEFL					OSBPL6				COPS3				EYA2
				POLL				HLA-DQB1				MKNK2					IRX4				TTLL12				NT5DC1
				ATG13				CLCF1				THAP7-AS1					CTCF				SLC25A40				SLC25A14
				FADS3				S100A16				PDGFA					STRIP2				CETN3				TMEM55A
				NTSR1				KLF13				RGS3					IPO9				B4GALNT1				PXMP4
				DENND2D				LAMA3				CD82					ALYREF				DCAF13				FANCM
				GABARAPL2				KRT80				SOX13					CDK11B				WDR74				RUFY1
				URB1				AP3S1				ARRDC3-AS1					SH3BP1				MRPL15				KDELR3
				PTPN14				NICN1				FAM109A					SCD				HSPA1B				SMAP1
				KLK7				FIBCD1				PKD1L1					RAD9A				OSGEP				PKN2
				ANKS6				GNA14				LOC101928062					ZNF534				FHOD1				PRIM2
				CYP24A1				CCDC51				FOXL1					LOXL3				GPATCH4				TMEM200A
				CAMTA2				RUNX1				NCBP2-AS2					NEDD1				CISD3				MAP3K12
				IL18				MAPK11				OR2B6					NUP93				ARRB2				PITX2
				CDC42SE1				PYROXD2				SRRM5					PTTG1				AIMP2				FCHSD1
				PCBP4				SH2D3A				C3					HNRNPAB				EIF2S1				JTB
				GOLGB1				SNN				GDNF					DPYSL3				RAB3IL1				FAM49B
				ZBTB4				ARRDC2				NTNG2					NMU				NSUN5				STK39
				EEF2				RAMP1				KCNN1					FIP1L1				ANAPC1				GMIP
				CERS5				PCDH1				HIST1H3H					ANP32E				PDCD2L				SLC16A14
				SFXN3				KLHL24				CASC1					CSTF2				SORBS3				CASP9
				RAP1GAP2				FLYWCH1				SLC7A5					KDM1A				PES1				TASP1
				SLC39A11				ST3GAL1				HIST1H1C					PPM1G				SAMD1				AP3M1
				TLCD1				P2RY2				CTSW					HSPH1				TMEM121				ELOVL4
				PVRL1				STK17A				PLTP					NOC2L				FUBP1				CBX7
								GLTP				DUSP8					KDELC2				PPAT				DYM
								ADM2				PADI1					MTHFD1				DPAGT1				EPB41
								PTPRU				AANAT					DBR1				LSM5				SORD
								TGM1				FLJ10038					SLC1A5				DHX37				CRBN
								TTC9				CPLX2					RPA2				SNRNP40				MSANTD4
								LMNA				MEGF11					SART1				PHTF2				CTHRC1
								SPOCK1				ZNF488					KHSRP				DDX10				RAD51
								ITPKC				ZNF561					TMEM200B				TNPO2				B3GNT5
								ITGA3				FENDRR					DCK				CMC2				MLKL
								IFT122				F2RL2					DIAPH1				HEATR1				CREBL2
								B4GALT1				IL17D					MIS18BP1				RAVER2				VASH1
								PITPNM1				GPR56					IDI1				MTERFD2				PPP1R21
								MAFF				HIST2H2BE					TBCD				MRPL55				RNF146
								HECW2				FRMD8					TUBGCP3				MUC1				RAB23
								TMEM45B				TRAF3IP2					HAUS4				AFG3L1P				MRPL46
								POLD4				MICALL1					C11orf82				NAA38				ETV4
								RFX7				MAFF					UPF3B				CBX3				KNSTRN
								NDRG4				PLEKHO2					TAF15				HSPD1				CNRIP1
								MYO1E				CBX4					PPIG				NUP153				NFU1
								ARFGAP3				UNC13A					TRIM59				MANEAL				FADS1
								MAST4				IL1B					PARP1				C6orf136				CLCF1
								IL4R				RBM38					ATAD3A				SLC46A1				CLOCK
								CACFD1				PNRC1					RAVER1				NOP56				COG5
								LINC00963				AIM1L					DDX39A				NDUFS3				DTX3
								ELL2				AGXT					ADM5				IKBKAP				NHLRC3
								SYT8				SCN3B					DEK				DCTPP1				TRIM45
								NXN				SCAMP1-AS1					HAUS3				GMPS				DPY19L4
								SPATA7				EID2B					CEP72				ISOC2				ACAA2
								SPIRE2				KLHL31					PAF1				PRDX4				NGEF
								TSPAN5				MTURN					PBX3				AURKAIP1				ACTR5
								F2R				CLN8					NUP62				NUP133				FAM204A
								S100A14				OLFM1					NRGN				TFPI2				NAA16
								TNFRSF21				DNAH1					CCHCR1				WDR4				ZNF26
								RAB31				BAK1					KNSTRN				FASTKD2				CBX3
								FLVCR2				HSD17B1					SUPT16H				PLP2				MAN1A1
								PRKCH				GPBAR1					ITGB3BP				QPCTL				NSL1
								ZFP36L1				ANK1					EIF4A3				NUP88				COPB1
								PIM1				ADAMTS7					PLSCR1				MRPS2				L3MBTL2
								KLF3				F11R					NUP107				TUBB4B				FAM206A
								ZNF114				TOLLIP					NET1				TOP3A				MCM8
								NACC2				ANKRD33B					AMIGO3				NCOA7				TMEM179
								FGF13				PLXNB3					PTRF				NUDT21				CDK14
								ARSD				SELPLG					WHSC1				USP28				SH3BP1
								SPRN				PITRM1-AS1					CHTF18				SRM				CCDC102A
								RASGRP1				ITIH5					GEN1				TPMT				ISL1
								MYH14				KIAA0930					TRAF2				ACTR5				PDHB
								LOC401052				TNFAIP1					WDR24				SRSF1				CLN3
								FUT8-AS1				PHLDB3					CEP131				HTATSF1				ANP32B
								TTC7A				LOC284889					ATAD3B				CCP110				WDR6
								CLDN4				FAM212B-AS1					CDK5RAP2				CDC25B				C7orf25
								BBS1				SLC7A8					FANCC				BMS1				BCL11A
								LRRC8A				LYNX1					LIN9				RPA1				TCF4
								GPR37L1				ZNF425					LAS1L				C3orf14				UGP2
								SPECC1				CASKIN1					ETS1				XRCC5				RCHY1
								S100P				TSPAN1					HAUS5				SYT3				NTHL1
								TAB3				LINC01004					TREX1				RERG				PROSC
								HDAC5				AP5Z1					SF3B2				MAGOHB				CEP44
								CALML3-AS1				FAM21EP					TMEM209				PACSIN1				SLMO2
								TRIM16L				SOX8					HMGCS1				SIMC1				TOPBP1
								PTENP1				PIP5K1C					TMEM201				LSM6				IRF2BPL
								TMSB4X				TRAPPC6A					JPH1				HEBP1				ASTE1
								GABRD				DYRK1B					AURKAPS1				TIMM10				MBIP
								SYK				SLC8A3					CNP				TOE1				USP21
								SNCG				LOC344887					CCT5				MAPT				TMEM234
								NUDT18				CLDN15					SRSF2				NEDD1				NEDD1
								ERMP1				PRG2					MBOAT2				DNLZ				NAV1
								RALGPS1				PANK3					LOC100288637				NAA15				PCGF6
								PCAT6				FOXS1					TRIP13				NFYB				CWC27
								NFIL3				ISCU					DNAJA1				LSM8				DNAJC1
								CCRN4L				PLEC					DBF4				RPL18A				FAM13B
								PDLIM1				MED26					BORA				STRA13				FAM57A
								TMEM2				DGKA					PAQR4				COLGALT1				LRRC16A
								NEBL				MYCN					CEP135				SLC29A2				ITGB3BP
								PPP1R13L				PPP1R10					STARD8				SNRNP25				MSH3
								FAT1				FAM49A					TELO2				ARAP1				ISCA2
								KRT19				MARCH4					HMGB1				IRX3				ZHX1
								RIN2				CUBN					FN3KRP				NOL11				RPAIN
								RAB10				CHPF2					C9orf40				PTPLAD1				MAT2A
								DUSP6				SBSN					TCOF1				TP53BP1				MIOS
								C16orf52				MOB2					CCDC150				MRPL4				BRWD3
								KDM7A				CD74					MIS18A				TDP1				FKTN
								SEC31A				RGS5					DCAF15				SMC3				FAM208A
								LINC00673				BAMBI					DHFR				SART3				ARMCX6
								PAX9				FLYWCH1					SMC3				RIPPLY3				E2F2
								KDM6B				TIGD3					SAP30				CHD1L				RAB3IP
								CCDC83				ZSWIM4					PRR11				VARS				FANCA
								DUSP16				HIC1					PRPS2				ARHGEF26				ELOVL6
								CDKN2B				ATP8A2					SAFB				HIP1				PIK3CB
								PBLD				CDNF					TMEM194A				TRIM28				NFYB
								C19orf66				SERINC4					HNRNPA2B1				ELOVL5				ZSCAN26
								LAMB3				LOC100287846					PHGDH				GPRIN1				GNAL
								PML				CYP2B7P					SRRT				BCLAF1				LYPD6
								ALDH7A1				PVRL1					RMI1				RABEPK				TMUB1
								RHOF				ST3GAL1					NOXO1				PLCG1				DDHD1
								SNX21				ARTN					CEP128				RAC3				PRPS1
								PRKAG2				KCTD5					DNAJC1				TMEM97				SMC4
								CYP24A1				CALR					RECQL4				TCERG1				CMTR2
								C6orf52				MTRNR2L8					PFKP				ILF3				PCGF2
								SIGLEC15				NGFR					GMPS				GINS4				SNX24
								LOC100129034				KCNIP1					EFNA2				TAF6				UPF3B
								RFNG				SDC4					UPP1				TPR				NECAP1
								FAM83H-AS1				TRIM52					KIAA1279				ATIC				SNAP25
								NEURL1B				SKI					ACD				RFT1				PLEKHG2
								STARD5				FADS3					BCL2L12				RPP40				MYO19
								PLXND1				MAPK8IP3					SAMD1				WDR24				GNPDA2
								ARHGEF3				MIR4458HG					DDX12P				TIMM50				KCNK1
								HIVEP1				AOC2					PTTG3P				DIAPH3				C5orf22
								IFITM10				ERN1					RBBP7				ALYREF				TRPC1
								MYOF				SYCE2					EMP2				C2orf81				RING1
								PHYKPL				RASGRF1					CCND3				TUBGCP5				NUDT22
								FMN1				KLHL21					SMC1A				FJX1				EPS8
								EPHB4				DCUN1D3					GAS2L3				RIF1				KIAA1841
								NXNL2				PGBD2					EBP				THYN1				RRAGD
								ZFP36L2				NR5A1					SSRP1				RNASEH2B				SPDL1
								PIK3R3				ZNF654					HAUS1				PRPF19				TRAPPC13
								CCDC71L				LINC00886					POC1A				SLC27A3				ATP9A
								LCOR				PPDPF					FAM198A				NQO2				PPIP5K2
								TNFAIP1				ZNFX1					MDC1				ST7				GEMIN6
								ZDHHC3				CCNK					JADE1				FAM195A				DHX35
								PNPO				UBAC2-AS1					CASC5				BRCC3				GOLPH3L
								LATS2				GPR78					RFWD3				RPL35				CISD2
								SAMD4A				DUSP5					GPSM2				CD3EAP				TMCO6
								CLN8				EXOC3L4					DUT				PTDSS1				UHRF2
								ZNF37A				GCGR					USP37				FSD1				FRA10AC1
								NR1H3				SMIM4					ARL6IP1				CDV3				CIT
								SHC1				MARK4					SRSF4				KAT2A				SFMBT1
								SLC2A10				LOC100289495					ASPM				DNPEP				ABCB7
								CLIP4				UBOX5					TIPIN				C19orf48				TMEM169
								TMEM117				LOC155060					SHPK				SLC2A4RG				HELLS
								SMTNL2				RPL23P8					CKAP2				CNPY4				SKA3
								C1orf106				VAMP2					H2AFZ				NOC4L				LONRF1
								FAM174B				PLAC8					PHF13				PPIH				SPAG16
								TMEM131				NKD2					RTKN2				NAA10				TAF2
								SLC27A4				C7orf55					HSP90AA1				C9orf40				PRPF40B
								SPTSSB				ZNF408					TTI1				SLC7A1				AIM1
								LYPD3				EBI3					FANCD2				ISY1				PNMA1
								FAM110C				ATP6V0A1					HIRIP3				RP9P				DYRK4
								OPTN				AMBP					NRF1				PODXL2				ME2
								TRIOBP				HEYL					KIAA0101				FN3KRP				SHPRH
								KLF10				PLEKHG3					CWF19L1				LRRC20				EFNA5
								ZNF654				ASH1L-AS1					CCDC77				HNRNPR				EFTUD1
								PINK1				CLSTN2					SPDL1				RAN				COX20
								BCL2L11				ANKRA2					C16orf59				TUBA1C				LEMD3
								TSPAN14				LOC100507501					CDKN3				FH				ZNF280D
								C10orf118				AHRR					PTBP1				EIF2B3				PALMD
								HBP1				TMA7					XRCC1				TCTN2				GCH1
								LXN				CCRN4L					TRIM28				DDX55				SEC23B
								F11R				RAB30-AS1					HNRNPM				NUDCD1				DALRD3
								ZBTB46				METRNL					ACSL3				ENTPD2				STRBP
								CRADD				GUK1					TUBA4A				FKBP11				CD58
								CDK6				WDR25					LMNB2				MCMBP				IKBKAP
								LDHD				MTRNR2L3					GLI2				MZT1				PSMD5
								CAPS				GABPB1-AS1					DEPDC1B				EPOR				CEP112
								DENND2D				SORBS1					C18orf54				HSP90AA1				ARRB2
								BACE1				MPV17L2					CARHSP1				GAR1				HEATR5B
								AGBL5				KITLG					STIP1				TRA2B				ECI2
								WIPI1				SLFN5					LBR				GLA				CCNO
								SPRYD4				ETV3					SCARA3				TMEM201				MRPS9
								DDR1				FOXD2					ARHGAP19				SLIRP				MPPE1
								CLIP1				LINC00476					RAD18				SAAL1				CCBL2
								MARCH2				C19orf82					ARL6IP6				C4orf48				EHMT2
								GSN				TMEM44-AS1					CDK2				RAD21				CHD4
								RIT1				NR0B1					KIF4B				ILF2				ATE1
								STX3				ZFYVE1					DHCR24				SF3B3				SP4
								ADRA2C				LRRC8A					KIF18A				DPYSL2				GSPT2
								ECHDC2				SCIN					IMPA2				LSG1				BPNT1
								SMIM14				RPL23AP53					MAP1S				SACS				SEC22C
								MAP3K14				BCL9L					CENPL				NDUFAF2				TMEM218
								KRTAP5-AS1				NBR2					WRAP53				RPARP-AS1				DLAT
								STC2				ROM1					VRK1				DHX33				SLC8A1
								GATSL3				BCAM					SF3A2				MAP3K6				THOC1
								ZSWIM4				TMEM68					TUBA1C				CENPV				VEZF1
								THSD4				SAT1					POLQ				KLHDC4				BUD13
								MAD1L1				HHAT					SLBP				CSE1L				HMGB2
								CEBPB				IGF1R					XRCC2				SMYD5				OXNAD1
								FAM105A				BCL2L1					LHX2				ACTL6A				CWC22
								NR1D1				AK8					CENPJ				SOAT1				STK36
								ZBTB22				DUSP7					MBOAT1				SALL2				EXOG
								LINC00294				ZBED5-AS1					KIF20B				KCTD15				PTX3
								IFT20				ZNF441					DDX11				QTRTD1				C7orf31
								RSPH3				PANX2					IQGAP3				C19orf40				SLC25A24
								ABCB6				PMEPA1					NUP85				NR2C2AP				SLC11A2
								LURAP1L				CDC42EP4					LMF2				NCBP1				LINC00888
								MICAL2				MAP1LC3B					TONSL				RNF157				DNAJC9
								MPZL3				NADSYN1					RAD21				TTC27				MCM4
								STK40				MXD1					ZWINT				EMC9				DNAJC18
								NABP1				HMCN2					UBE2C				LYRM4				EPSTI1
								RASSF3				UGCG					CIT				SLC19A1				CARD8
								PVT1				TBC1D2					SHMT1				TMEM38B				SCFD1
								FEZ1				INHBA					ARHGAP11A				MRPL16				ZCCHC11
								GPR179				FAM229A					FUS				C9orf142				WRB
								VPS9D1				STK17A					ACAT2				PRMT1				XYLB
								DCAKD				UCP3					CBX2				POMT1				FGD5-AS1
								LMO7				ZNF70					ANKRD32				RRN3				CDC25A
								MUC5B				WHAMM					RFC1				NUP93				UBA6
								CYR61				CDKL5					C14orf80				FKBP4				RHBDL3
								PDGFA				PPARD					PHF19				NLE1				ILVBL
								UBAP1				SORCS2					FOXM1				USP13				GEN1
								VPS37D				POLR2L					EXOSC9				ARHGEF25				NDC1
								MTFR1L				FOXF1					PSIP1				NTMT1				DEK
								MPZL2				NDRG1					KNTC1				SKA2				ANXA3
								SLC2A1				HIST1H2BK					ESAM				NUDC				EPB41L3
								HES1				SERPINA3					NCAPD3				SSB				ZEB2
								SMURF1				CCND2					POLA1				FAM92A1				FZD7
								MREG				TPRA1					C5orf34				RND2				CNOT10
								TRIP6				HOXC13-AS					MCMBP				SMKR1				NPAS2
								HMBOX1				C2orf27A					PARP2				DHODH				HAGLR
								ADCK3				LOC100506469					H2AFX				CENPW				TMEM56
								DDA1				MTRNR2L6					CDK1				NOP16				CDC25C
								ADPRHL1				CREM					RRM1				IMMP1L				PTER
								RMND5A				ZNF121					CENPK				AK2				SLC35A1
								TOB1				DANCR					IQCC				FMNL3				LPL
								NIPAL2				RSC1A1					LRRC45				EMC1				KIAA1430
								AGAP1				TSC22D3					TUBB				PRPF4				MIS18A
								SPATS2L				RPL26L1					DNA2				RPL22L1				RPA2
								ABCC1				GNA11					GINS3				DDX23				FYCO1
								CCDC120				CDIP1					NCAPH2				ARL2				GDAP1
								AK1				HSPA6					POLE				DPYSL5				THYN1
								EFCAB4A				RNF44					UBE2S				TRERF1				GTSE1
								CAPN1				KISS1					C17orf53				PRPS1				ARL13B
								CHST15				EPAS1					CHEK1				MUM1				NCAPG2
								XPR1				HOXC13					TOPBP1				LMNB2				AURKA
								PCED1A				MAST4					USP1				C1QBP				MYOCD
								GATA3-AS1				ITGA9					UBR7				IFRD1				RFC3
								PPAPDC2				SMPD3					EZH2				CERK				B3GNT1
								ABHD17C				SYNE3					GPRIN1				SORD				GREM1
								TNFAIP8				PIM3					TROAP				USP1				CREB3L4
								NRBP2				GATS					ARHGEF39				RPA3				SURF2
								OLFM2				KRT16					SERPINH1				NARS2				RNF182
								GALNT10				ULBP1					CDCA4				NT5C3A				NBPF1
								P2RY6				HSPG2					DNAJC9				NAE1				CDCA7L
								XBP1				CPEB4					MMS22L				CNTROB				ZNF700
								MMP24-AS1				LNP1					RPA1				VPRBP				HEATR2
								LINC01003				CYP27B1					MTBP				SVIP				CEP78
								CCND1				RNF208					MAD2L1				KREMEN2				CHRNA5
								SH3BP4				COL15A1					NCAPG2				PRR24				RAB15
								FAM200A				GAMT					SUN2				DDX46				AHR
								CLSTN2				NDUFA7					FANCA				DDX51				GBAS
								ITGB6				TNFRSF1A					OAS3				TCIRG1				CKAP2
								TBC1D22A				NR6A1					FANCB				UTP18				EOGT
								FOXA1				LTBP2					MCM8				MST4				ARMC8
								CD68				VAV2					SMC4				RASSF8				PI4K2B
								FAM107B				TRIB1					MELK				L2HGDH				FANCG
								SLC35D1				CACNG8					TIMELESS				PRKAR1B				PDE7A
								KAT2B				CSGALNACT1					RFC2				SLC16A14				C1orf21
								PIGF				ARHGAP5-AS1					SMC2				COQ3				RB1
								ITGA2				SDC3					CDCA7				MRPS25				RRM1
								KIAA1324				TSPAN14					DNMT1				TCOF1				PPP1R16A
								ABLIM3				RELT					RNASEH2A				MYB				MITF
								ZXDB				PTPRH					KIAA1524				CARHSP1				TIMELESS
								KDM4A				NFKBIE					HAUS8				NOP58				METTL14
								ANK3				TMEM115					ESPL1				U2SURP				CYB5RL
								OSTM1				MAP1A					RAD54B				C9orf116				CDO1
								FADS2				HKDC1					TUBA1B				PRKDC				DMXL2
								TAB2				KRT17					FANCI				TLN2				QRSL1
								SRGAP1				SHB					PASK				HYLS1				PUS10
								FNIP1				BLOC1S4					PIF1				SMCO4				APBB1
								GMEB1				SNAI1					CENPM				YEATS4				DDX60L
								SYT7				PTCH1					CDC7				SMC6				SCRN1
								GLI4				LINC01270					RACGAP1P				RHNO1				RNASEH2B
								ANKRD35				FAM57B					FAM222A				POLR1B				SHOX2
								C6orf226				KCTD13					KPNA2				NOC3L				UBR7
								PLEKHF2				SSU72					FAM111A				NXT1				VSIG10
								PLEC				LINC00263					DPYSL2				CCDC58				MTPAP
								WDR45				ADSSL1					CENPI				C6orf211				EMP2
								ZNF195				MAPKAPK2					AUNIP				SHISA2				TPX2
								FBXO25				PANK1					RBL1				PBX3				TRMT61B
								SPIRE1				ARHGAP23					CENPF				SMPD4				DDX3X
								BAIAP2L1				DDR1					SASS6				PHKA2				OSBPL9
								IRF6				SGCA					PRIM2				TMEM177				PALM2
								CTIF				APOM					RFC3				PWP2				ARMCX3
								CLMN				SESN3					NASP				HSPH1				NIPA1
								TRIM2				HRAS					GSG2				COL12A1				NUP133
								ZNF516				GPSM1					C1orf112				HAGHL				FSD1
								SIDT2				ARFGAP1					SLC43A3				UCHL5				CDK20
								PCGF3				OSER1					ECT2				NEURL4				TTF2
								A4GALT				RXRA					MND1				SULF1				METTL23
								JUND				STK10					TK1				HSPA13				PIP4K2C
								C9orf9				ZNF791					CENPQ				FZD9				TDP2
								LITAF				PSMG3-AS1					KIF14				ZMYM3				TOR3A
								MAP2				MIR22HG					GINS1				ASPHD1				LCLAT1
								MYO5A				UQCC1					PIM1				LINGO1				FBXL3
								FRMD6				COL5A3					MXD3				FOXRED2				TOM1L1
								HNMT				PLEKHG1					INCENP				RNF26				SNAPIN
								LINC00263				SH2B3					CENPO				BRIX1				C16orf59
								TMEM184A				FLNC					POLE2				DCLRE1B				GSTCD
								CYTH2				C19orf53					KIF24				PCNT				VPS54
								HPS1				KDM4B					CENPA				LARS2				HLA-DPB1
								MISP				OSER1-AS1					H1FX				CXCL12				SPC25
								CLDN9				SLC12A7					TAF5				METTL3				BRD8
								PYCARD				ZNF195					TMPO-AS1				CCNF				TMEM237
								C10orf32				TCEA2					SUV39H1				POLR2I				GPAM
								PSD4				NMNAT2					ATAD5				CWF19L1				RBBP8
								SGPP1				SOCS3					UBE2T				PGAM5				EXTL2
								TACSTD2				C16orf91					XRCC3				PRADC1				NUP160
								MED13L				FURIN					PRIMA1				IPO9				NUP54
								ZNF217				FAM129B					BIRC5				LIAS				VRK2
								RNF38				EHD1					MYBL1				NLN				NASP
								NADSYN1				DAZAP2					SGOL1				SLC16A1				RHNO1
								ITCH				ARHGEF3					PRIM1				PFAS				BAZ2B
								PPP1R15A				CHRNA10					FAM83D				ICAM3				VEPH1
								GSK3B				RHBDF1					RMI2				SMARCA2				TICRR
								SDC3				KRT7					BRCA1				MIIP				ELOVL7
								TNIP1				MTRNR2L2					DIAPH3				NAF1				CD97
								TUFT1				FAM200A					GMNN				NUP205				ARHGEF1
								TUBA4A				GABPB2					HAT1				DHX9				EHD3
								INSR				NUAK1					WEE1				MRPL17				MST4
								CERS5				ADRM1					WDR62				HNRNPU				C6orf136
								CAB39				UNKL					FANCG				FBXO4				MRPL1
								ACVR1				WFS1					MSH2				FPGS				ZCCHC2
								IP6K2				FBXO32					NRM				ANKRD28				KIF5B
								LOXL1-AS1				MYT1L					PBK				DPY19L1				LOC100128361
								RDH13				TTYH3					PSRC1				LRRC3				PRKD3
								GAD1				LRP1					POLD1				SFXN4				PHC1
								CD97				IGFN1					MASTL				RTN4RL2				NCAPD3
								STAT3				STARD10					DEPDC1				POLD2				ISOC1
								BCL3				PER2					KIF15				TTI1				CLUAP1
								AFF1				C7orf43					SPC25				TOMM5				KIF4A
								APLP1				KRT14					FIGNL1				TRMU				TOP2A
								OBFC1				WIPI2					TMPO				RAVER1				SLC25A43
								TNFRSF1A				GAN					GPR19				DLX1				PLAG1
								WWC3				PVRL2					IL17RB				C14orf80				GCFC2
								TSPYL2				LOC102724094					SGOL2				CCDC78				FAM98B
								SH3BP2				RPL23AP82					MTFR2				NTHL1				RACGAP1P
								HIF1A				AKT1S1					FAM64A				EMG1				ZDHHC17
								VEZF1				EXTL3					CCNB2				RRP7B				SMC2
								MIEN1				COX6B1					KIF4A				HNRNPAB				PHF19
								ECE1				NIFK-AS1					TOP2A				PNPT1				EML4
								ZG16B				EN2					PEG10				ING5				MCTP2
								MAFK				PCNXL2					DONSON				BCAT2				HPS3
								ZNF564				PLXNB1					KIF22				TFAP4				ASB13
								KIAA0430				MYPN					MYBL2				SAPCD2				FHOD1
								FUT8				BAI1					SKA3				RUVBL2				XRCC1
								DNAL4				EXD3					CDCA2				DCK				DNAJC24
								SIK1				SDSL					HMGB2				SNRPD1				NFIA
								MAP1LC3B				SEMA3B					CCNF				CCSAP				AURKB
								UPK2				SCG2					PLK4				POLR3K				ANKRD44
								DKK1				PLCE1-AS1					SPAG5				SLC25A37				PCDH18
								MACC1				FUCA1					RFC5				CCDC85B				PAOX
								NMT2				MSX1					RACGAP1				PPT1				CBY1
								CSNK1A1L				TTC28-AS1					ZGRF1				PHB2				ZNF821
								FAM149B1				CD99					POLD3				GEMIN4				XYLT2
								SPINT1				LOC100133091					CKAP2L				HHEX				CAPRIN2
								LPP				C9orf37					DSN1				SLC39A4				PPP1R26
								MIDN				ZBTB7B					DLGAP5				OIP5-AS1				HCN3
								CRKL				DISP2					FBXO5				RRP9				MELK
								UFM1				LYRM1					TICRR				SRSF2				NUSAP1
								RIOK3				ZSCAN16-AS1					CCNB1				SLBP				HMMR
								TRIB1				TAF3					KIF18B				PKN3				USP28
								PCYT1A				RPS6KA2					KIF23				MNX1				KATNAL1
								GALNT2				LOC220729					TUBB4B				NFIX				WEE1
								STON2				MZT2B					WDHD1				TBC1D4				RAB27A
								AKAP8L				PIGP					CENPE				NUP37				HAUS4
								RARG				DRD2					HELLS				TRMT1				PMS1
								FBXO44				ZSCAN25					UNG				VGF				BBS10
								SGPL1				BANF1					MSH6				KIAA0586				CEP57L1
								MOB3A				TAF13					NUF2				NOP2				MAMSTR
								TMCC1				MLF2					AURKB				RFWD3				ETFDH
								ARF6				PIP5KL1					STIL				THOC1				TMEM168
								STX6				TSPAN9					HMMR				BCS1L				GTPBP2
								KIAA2026				SNRPD2					CENPU				CCDC74A				IRF8
								NOTCH2NL				LOC101929723					DSCC1				DKC1				ZIC1
								PTPN14				LATS2					ERCC6L				PYCR1				UGT8
								EIF2AK3				VPS37B					CHAF1B				MED30				NXPE3
								PRRG2				CCND1					GTSE1				PAQR8				MARC2
								SLC38A7				PI4K2A					CDCA3				TMEM191A				PAX7
								ZNFX1				KLF2					ORC6				TMEM106C				MYBL1
								ANXA3				GALNT15					CDCA8				HSPA2				BRPF3
								DNAJB5				CRTAC1					TPX2				RPS29				C1GALT1C1
								GSS				RABL2A					TP73				BUD13				NUP205
								AAK1				PMM2					POLA2				METTL16				TMEM39B
								SEMA4B				ULK1					BUB1B				SRRT				USP1
								PADI3				RNF213					KIF11				KCNK5				WRAP73
								TRIM8				PLEKHA6					CEP55				RUVBL1				CLDN12
								TLDC1				SMAD7					RFC4				C12orf65				CENPA
								RPS6KL1				ZNF581					MCM6				NCL				METTL5
								PFKFB3				ANKRD11					BRIP1				DIS3L				COQ9
								INPP4B				IFFO2					UHRF1				HAUS6				ACOT11
								EPHB3				S100A6					AURKA				BOP1				SPAG5
								C6orf1				PPP2R2D					KIF20A				HOXC6				SLC35F2
								ATG13				TMEM59L					NUSAP1				LINC00052				SKA1
								PTEN				FLNB					BUB1				SFI1				RRAGA
								NARF				SIPA1L3					CDC25C				PDCD11				ARMCX4
								SLC22A23				LOC90246					MCM3				PRMT5				CDK2
								LOC642852				STPG1					RAD51AP1				FUS				SLC29A1
								MKL1				UBL5					TTK				MAT2A				GK5
								DHX32				ORAOV1					CDCA5				SIGMAR1				FERMT2
								SHISA5				COL22A1					FEN1				ANP32B				WLS
								PNPLA8				ATP6V0E1					ANLN				MPHOSPH9				SIRT1
								MTSS1L				F8					TCF19				HEXIM2				ZNF853
								MOV10				SELM					MYB				CGREF1				KIF18B
								EPC2				CACNA1H					TRAIP				ALDH9A1				PRKAA1
								VPS37B				MMP11					NEK2				PHF10				MAP3K4
								UGT1A6				APOE					ASF1B				NOC2L				MBNL3
								LOC283070				LOC90784					RAD54L				MTERFD1				PPWD1
								PANK3				SOX2					RIBC2				ODF2				POC5
								DTX2				NOL3					CDKN2C				PPP1R26				SRSF12
								KIAA1522				MICALL2					MCM7				TMEM194A				PHF6
								BTBD10				DBH-AS1					PSMC3IP				SH3BP1				SENP7
								LRP11				KRT76					NEIL3				ELOVL7				PGM2
								CRISPLD2				TPT1-AS1					BARD1				SLCO4A1				RGS4
								MGAT5B				PPP5D1					MKI67				BEND3				C2CD5
								PVRL1				C15orf39					RAD51				STK32C				CLMP
								FBXO33				PLXND1					TACC3				NAT10				CASP8AP2
								FNBP1L				LMO7-AS1					MCM4				SNRPB				ZBTB14
								BNIP3				FAM107B					BLM				PUS7				CKAP2L
								MAPK6				RAB5C					LMNB1				NDC1				ZHX2
								CCDC125				C5orf55					NCAPG				G2E3				IFT88
								ABTB2				RRP12					ATAD2				MANEA				SPAST
								NAV2				ZFC3H1					HJURP				ORC3				UACA
								FLJ37453				ATP6V0C					CDC6				IVNS1ABP				IFIT2
								CEP170B				S100A11					SKA1				NFATC2IP				CACNG4
								SLC9A7				CDC34					PKMYT1				GPSM2				EMG1
								IER2				CYHR1					KIF2C				PARP1				NAPEPLD
								BMP1				SYNC					CDC20				TRAP1				NUP107
								PARD6G				AMZ2P1					PRC1				PGRMC1				COQ10A
								RASEF				PCSK1N					CCNA2				JAG2				SLC43A3
								STK38L				EI24					GINS2				GRK6				FUZ
								FOXO3				CTIF					SHCBP1				SRSF7				CDKN3
								FRMD8				CXCL8					RRM2				SLC30A3				SOCS2
								CLIP2				KDM6B					E2F1				SNHG12				SOX12
								SERINC3				BMF					PLK1				RMI1				MBLAC2
								WASF2				ZNF263					NCAPH				CTPS1				EXD2
								MARCKS				COX5B					E2F8				TAF15				AMPH
								JUNB				ZNF469					CDT1				KPNB1				MRPL19
								VAMP3				LY6K					NDC80				EBP				ABCB4
								PLEKHM1				STXBP2					MCM2				ARL6IP6				CLK4
								PDCD4				NPPB					CDC45				HLTF				TTC8
								GABPB1				LINC01082					ORC1				POLR1E				TSPAN12
								MAP4K4				KCNJ6					KIFC1				TMEM180				SNX10
								GABARAPL2				NPLOC4					CDC25A				LRP8				ADD2
								ANXA2P2				CRELD1					FAM111B				NCAM2				WHSC1
								NFKBIA				ZNF746					ESCO2				PRPS2				ANP32D
								MYO18A				PPIEL					MCM10				TCF7L1				LYPLAL1
								ZFAND3				COTL1					CHAF1A				KIAA1731				CDC6
								LYRM1				KSR1					E2F2				OSBPL6				DHX40
								MZF1				SH3BGRL3					KCNJ2				ICA1L				PMPCB
								DIO2				CYB5D2					DTL				BRD8				C12orf29
								SRC				STX6					CLSPN				CLCN2				GINS3
								UNC13B				TNIP1					EXO1				C2CD4C				ORC4
								FLNA				PUS1					CCNE2				TIGD3				BOLA3-AS1
								TANGO2				DPM3					ZNF367				C16orf93				TRAF5
								ARFGEF2				ACHE					WDR76				MYBL1				IRX5
								ANGPTL4				GLI4									UCK2				SLC46A3
								PRKAB2				AGAP1									NOD1				BBS5
								RRAGC				PPME1									RBFA				CNTLN
								EPHX1				CDKN1C									GART				NSMCE4A
								CD58				MAP3K3									PRELID2				TGFB1I1
								MPRIP				TNFRSF14									HAUS1				RALGPS2
								HSH2D				SHANK3									RBM28				LGALSL
								THBS3				CSNK2A2									FAM213B				C18orf54
								IRF1				FOXF2									PPARGC1B				DOK1
								STX5				TLE4									KCNS3				METTL10
								MYH9				PPARGC1B									UTP20				MUT
								BRMS1L				YRDC									GTPBP3				GYG2
								PTK6				RCC2									VKORC1				OTUD6B
								BIK				ZNF394									NPHP4				TMEM184A
								MID2				GATA2									TRIM45				HAT1
								PRUNE				ARF1									KIAA0020				ZNF184
								BEX2				YBX3P1									LOC101927746				THOC6
								REXO2				RHBDF2									CENPQ				HSD17B11
								BCDIN3D				JUNB									GALNT12				CHIC1
								C4orf3				LOC101927497									GALNT14				MREG
								CTBP2				MRAS									CLN6				TMEFF2
								MED19				ZNF275									TYRO3				IQCB1
								OTUD1				ATP5I									FHL1				GNL1
								GLCCI1				BDKRB2									PSMG4				FAM111A
								MYL12A				TMSB10									SPIN4				GGCT
								ERBB2				TCEB2									PGBD5				HECTD2
								BNIP3L				RHOB									LRRC45				TET2
								CRELD1				ZMIZ1									ADD3				PSRC1
								ATP6V0C				SMAD6									FANCM				DNAJC19
								HGSNAT				OAZ1									HSPA8				GBP1
								RNF11				POM121									GCAT				CDC20
								OCIAD2				AP1S1									WDR12				PARPBP
								TMEM134				HMG20B									MYBBP1A				RGS14
								MVB12B				MMP14									ARHGAP19				GPD2
								MAP3K12				TCEA3									PDSS1				ARHGEF39
								ARL8B				FOXN3									NUDT8				KIF20B
								HRAS				GADD45B									IPO4				C1orf56
								NOTCH3				SERF2									OXNAD1				EPS8L1
								MED20				KIAA1462									MRTO4				BRSK2
								ANKRD11				CCDC148									SOBP				NOVA1
								ACTN4				MGAT3									TUBB				CEP131
								IER5L				DYRK2									NUP210				FGF5
								C14orf132				TM7SF2									ARL13B				NAE1
								HDAC11				NUTF2									CEP72				NPRL2
								TCAIM				FAM127B									GPR137C				ARV1
								SMG6				HELZ2									ACTL8				DTL
								BCL9L				UQCRHL									CREB3L4				HYLS1
								LTBP1				MEF2D									NSMCE4A				TMEM126A
								PPP2CB				FAM171A1									GAL				GINS1
								TBC1D9				POM121C									SHMT1				TMEM136
								PTK2				SERTAD3									IFRD2				N4BP2
								FAM188A				EIF5A									REEP1				FAM92A1
								ZNRF1				BASP1									XYLB				CENPU
								AFF4				UQCR11									ACOT4				TIPIN
								FOXN3				SH3BP4									RPS14P3				ACP2
								WDR81				SLC12A8									ATAD3A				RAD21
								JUP				WASH2P									ITPKA				CEP128
								MTMR1				SLC30A3									ABCE1				ARNTL
								YIPF1				TPST2									DDX39A				CENPI
								RB1CC1				GPN2									HNRNPUL2				IFT22
								ESYT2				SRA1									EZH2				ALG10B
								VPS37C				MIEF1									TOMM40				EZH2
								MAP2K4				GOLGB1									LRR1				GRIP1
								SYTL2				MAFG									AHSA1				GJC1
								USP30				CYB5R3									CSTF2				TUBD1
								MARCH5				ZNF564									RPA2				BEND7
								NPTXR				ROMO1									ST8SIA4				CC2D1A
								WSB1				RPL35									MIS18A				ONECUT2
								LOC100506710				RPS15									MROH6				TTC26
								EGR3				PGS1									RAD18				PNMAL1
								TACC2				CFL1P1									HSPA9				CENPK
								IRGQ				SIRT6									PMS1				SMARCA2
								MLPH				ZNF219									CDK5RAP2				RAVER2
								BAK1				CHPF									SCLT1				FAIM
								SIDT1				UBE2H									HIRIP3				PCK2
								XIAP				METTL7A									ASRGL1				CENPQ
								EDEM1				CHST3									FREM2				MTMR4
								TOM1				SPATA2									NUP155				DTWD2
								MED15				ZNHIT1									METTL1				SQRDL
								CCNK				POLR2E									MATK				TDRKH
								SDK2				TPRG1L									CASP8AP2				RFX2
								JMY				C18orf25									CEP78				NCKIPSD
								EPC1				ZNF407									TP73				SPTLC3
								ZFP90				ZNF319									PSMG1				TARBP1
								ALDH4A1				KIRREL3									CCT5				IKZF2
								PPP1R15B				PET100									NUP35				CLASP2
								DFNB31				TNFAIP3									SPATA33				KLHL13
								CASZ1				BRI3									TAF1A				FOXA1
								AHNAK				S100A13									CDC42EP2				SERTAD4
								ANXA2				ITGB2									HSPE1				RHOBTB2
								DMPK				ANXA10									LAS1L				ZNF639
								ADARB1				SEC61A1									PCOLCE				SLC22A5
								ZDHHC5				AMIGO3									HSPB11				CEP97
								WSB2				TKT									GSC				KIFC1
								CCDC97				RPL18A									MNX1-AS1				ZBTB47
								FBXL18				FKBP8									ZBTB2				CDC23
								DIP2B				RELB									GEMIN5				METTL4
								FOXK1				ZBTB46									NPM3				MAD2L1
								RNF185				BAHCC1									FAM101B				ARMC9
								CAST				COL7A1									TEX30				TANGO6
								LDLRAP1				PCGF3									SMCHD1				PCDH7
								CHFR				BIN3									NUP160				C3orf18
								WBP2				KIAA2013									FANCC				CEP290
								MLF2				YPEL5									MDM1				HAUS5
								ENSA				RAB37									EXOSC9				FZD8
								PALLD				PSMD3									SAP30				RFC1
								SLC9A1				MLPH									CMSS1				RBL1
								MGST2				UBN1									PRIM2				MGC57346
								CD55				IL32									YBX2				HSPA13
								SLC38A2				FOXC2									MPP2				PTGFR
								ZKSCAN1				EMD									RAB27A				ATRNL1
								OVOL1				RRBP1									FBXO17				STK38L
								MINK1				NF2									H1FX				DARS2
								PPP1R37				PTPRG									BRICD5				PRC1
								SPATA20				DPYSL4									CEP85				SGOL2
								APBB2				COPE									C5				CASP8
								ATXN3				NDUFA13									PCOLCE2				MTMR6
								ELF3				P2RX1									SUPT16H				CDK1
								NEU1				PLXNA1									SLC1A4				PRIMPOL
								C11orf68				CDC42SE1									EPB41L2				ESPL1
								USP6NL				ADAP1									PKIB				ALG10
								FAM84B				RPL29									KATNAL1				SH2D4A
								DCAF4				ATP5J2									CHAC2				CHAC2
								ZMIZ1				ZFYVE27									FOXD2-AS1				KNTC1
								GOLGB1				TMEM127									CCDC15				SMCO4
								ARL2BP				ABHD12									AMH				C1orf35
								PBXIP1				RPL38									LYAR				ETAA1
								NUAK1				NUP50-AS1									NUP107				ATF7IP
								FRS2				PPIB									DARS2				LBR
								TOB2				FBRS									GLMN				TBC1D31
								TRAPPC6B				LOC100507577									HEY2				GPSM2
								SOX4				DLGAP1									FKBP5				USP37
								TINF2				SMTN									SNHG3				NUP35
								TMEM184C				PLIN3									DCLRE1A				S1PR5
								OSGIN1				PML									PRR3				NAT14
								CDC42				COX4I1									HOXC11				KIF2C
								BMPR2				TAF10									FGD1				IGFLR1
								DSC2				FAM127A									CEP57L1				SUCLA2
								KDM5B				TMEM259									SIVA1				KIAA1279
								SLC35E1				SLC3A2									PPAN				INTS9
								IRF2BPL				PADI3									CBX5				MCM3
								PLXNB1				RPL13AP20									SSRP1				WDR35
								C6orf132				ZNF436									C20orf27				ATAD2
								DUSP11				C2orf76									CHTF18				TRAM1L1
								CAMK1D				PLA2G6									MTMR4				KBTBD4
								ZFAND6				FAT1									QSOX2				SGOL1
								SPATA13				NDUFA11									KLHL13				MKI67
								RBM38				ZNF213									MUTYH				TRIM47
								PRMT2				FOS									SASS6				SAMD9L
								FAM195B				CASP3									HNRNPDL				BRCC3
								TGIF1				CCDC94									FARSB				BORA
								PLD3				ARVCF									CHPT1				ANLN
								RBM18				SCRIB									SNHG1				AGPS
								MAFB				FAM214A									GNAZ				POLI
								LMTK3				AK1									DNMT3B				KCNA6
								RHBDF2				NTN1									SLC16A7				TMEM106B
								IL13RA1				RPS28									TBC1D31				POMGNT2
								BSDC1				LOC101927021									EXOSC8				NCOA7
								GRINA				ARPC5L									SAMD11				L2HGDH
								VEGFA				IRF1									IQCC				POT1
								MYO1B				NHP2L1									DNAAF3				RBM41
								JUN				ZFAND3									MSH6				DSC2
								PRKCA				GSK3B									PABPC1L				SYT9
								MSI2				YKT6									AADAT				ACSS3
								KCTD10				HIGD2A									NCAPH2				APPL1
								LEPROT				CSNK1G2									HIST2H2AC				TRIM59
								RYBP				ZNF202									PDE3B				DOCK10
								FUNDC1				MSI2									HAUS7				C17orf75
								LOC100507217				INO80									PELP1				CHN1
								HILPDA				ARSA									COL9A2				FAM109B
								CAMSAP3				IER5									HAT1				KIF23
								RAB11FIP1				RHOC									SLIT2				ANAPC4
								SAV1				DPP9									LOC81691				C15orf41
								AVPI1				ZNF580									ACD				NAT1
								NDST1				AGRN									DBF4				RACGAP1
								FAM127A				ELL									MLKL				SERAC1
								TEAD1				SH3GL1									PRPF3				EYA4
								DPP9				TRAPPC2P1									MB21D1				FBXO3
								ETS2				EPHA4									NRTN				GTF2IRD1
								PIK3C2B				LINC00673									RMI2				ZNF260
								SERINC2				OST4									PTCD3				RRM2
								DLGAP4				C9orf16									MTBP				METTL21A
								WDR41				ZBTB7A									STOX1				CDCA3
								SBK1				MPRIP									CENPN				FSD1L
								TTC39A				POLR2J4									H1F0				PAFAH2
								SDSL				SZT2									S1PR5				NDC80
								RTCA				HMGA1									CHN1				TMOD2
								TMEM43				PCID2									BCL2L12				ABCB10
								ARRDC1				NARF									FBL				GATA4
								GIPC1				STMN3									UBR7				IMMP1L
								FLCN				BLOC1S3									C1orf233				CLDN23
								EGLN3				RPL31P11									MRM1				FNDC3A
								TGFBR1				PALM									TNFAIP8L1				GLRB
								RHOB				CD70									JPH1				TMCC2
								JARID2				CYP11A1									CCHCR1				AMDHD1
								SRF				MMP24-AS1									PARD6A				RPUSD3
								RALGPS2				MRPL53									PRSS53				IL17RB
								AMOTL2				FAM46C									LOC150776				DGKE
								CELSR2				GOLGA3									SMC1A				NUDT12
								C2orf68				SAP30L									TAF5				FAM69A
								DLG5				GAS6									GGH				MARK1
								MBTPS1				ZC3H6									KBTBD11				ANP32E
								GRHL3				NECAP2									NUP188				NR2F1
								RHBDF1				GCLM									HMGB1				ANP32A
								ACBD3				GALNT2									DGKE				USP13
								ANXA2P1				YBX3									ITGB3BP				SOGA3
								FNBP1				EIF3B									FAM216A				MMS22L
								MCL1				NKIRAS2									CAD				HJURP
								RALA				NDUFS6									FIGNL1				TMTC4
								FAM168A				SHC1									NR5A2				MTBP
								GRAMD1A				APLP1									ODC1				ARMC4
								GSR				MIF									DDX11				PEX11A
								FAM134C				C1orf52									APITD1				ECT2
								FEZ2				ABCG1									BAG2				PTBP2
								CHMP1B				SSR4									CENPL				POLA1
								SUOX				MGAT5B									FAM124A				SCLT1
								PXDN				SNHG8									WHSC1				LOXL1-AS1
								CSNK1G3				NDUFB7									F12				MTERFD3
								ZSWIM8				FBXO10									KPNA2				SAMD1
								MYO10				UBR4									TOPBP1				DDX60
								ZFAND5				CST3									KCNJ8				H2AFY2
								LAMC1				HIC2									RTEL1				ACADM
								VPS28				NACC2									KCNK2				DTNA
								TMEM127				RPS29									RPRM				NMI
								DNASE1L1				CRAMP1L									SNRPA1				ZNF512B
								SERPINB1				IRS2									FANCL				IFT80
								HELZ2				NXN									SLC25A19				MSH6
								HAGH				TMEM50B									ZWILCH				LIN9
								CUL7				GNA12									PLCH1				TSEN2
								SLC7A5				BACE1									MSH2				TRMT10B
								KRT10				GSTP1									RACGAP1P				TTC5
								TEAD3				PAPPA									HAUS5				FKBP5
								DGAT2				CCL26									LEPREL2				DPF1
								VGLL4				URB1									BRI3BP				FAM179B
								C1orf85				CAPNS1									MMS22L				HOXA4
								MAP2K3				C4orf3									GPRC5B				DSN1
								MAL2				TALDO1									DMBX1				CEP55
								PLEKHB1				PEX6									DTYMK				SEMA6D
								TFE3				PHC2									GMNN				ZNF624
								GADD45B				F2R									BDH1				ALG6
								OST4				BCAP31									EMC3-AS1				ARMCX5
								WDR1				PTPRU									LHX2				WDR17
								WDR13				EIF4EBP2									RANBP1				SFI1
								DUSP14				JMJD8									C4orf46				OIP5
								ZER1				MMAA									POLD3				AKAP12
								CSNK1A1				CRELD2									UBE2S				C4orf27
								PTGFRN				POR									TRIM59				CENPF
								APPBP2				TMEM63B									PRKAR2B				SLC16A7
								PSME4				TAPBP									TELO2				TRIM14
								GREB1				AGO2									DHFR				DHX57
								NFX1				ZNF623									SDC2				KCTD3
								DAAM1				IL17RA									C1orf112				PRELID2
								CIC				ATP6V1F									CCDC28B				RAD51AP1
								ANAPC16				EDF1									NFKBID				CMPK2
								SUV420H1				STK40									ELOVL6				STON1
								SUCO				MYO9B									DEK				ZNF287
								CCNI				ZBTB20									NUP85				MCM10
								CAT				RDH10									RLTPR				ENKD1
								EXOC7				DCTN5									CCDC109B				LRRC45
								CTSL				HPS1									KIF26A				RPGRIP1L
								SEMA3C				SOD3									WRAP53				B3GALNT1
								SREBF2				IFITM3									DDX12P				GLMN
								CCDC6				IRGQ									WNT10B				CCNB2
								SNX19				IP6K2									RBBP7				ZC2HC1A
								TAX1BP1				ATG13									C1QL4				SLC38A1
								SLC39A13				RPL13A									IMPA2				PSIP1
								TSC22D1				OGFR									GFI1				ZGRF1
								FZD6				LSG1									HOTAIR				RAB6B
								SIPA1L3				PRCC									KIAA0101				NRN1
								APPL2				EFHD2									SLC29A1				AMOT
								BCAS3				ZC3H7B									GINS3				CCDC109B
								SBNO2				SDF4									CYP2J2				PGBD1
								PLXNA1				CLCN7									LBR				IMPA1
								SPPL3				TMEM184B									SLFN11				JADE1
								ATP6V1D				LOXL1									GOLGA2P5				VCAM1
								GOLGA5				DNAJB9									EXOSC5				ARHGAP11A
								SMTN				TRIM11									HPSE				NGLY1
								SPSB1				ZNF222									PASK				GMNN
								CCDC92				CACTIN									XRCC3				EXOSC8
								EEF2				RPTOR									DNMT1				MAP9
								CDH3				DYNC1H1									PARP2				FPGT
								CNOT8				SOCS7									STMN1				LOC100288637
								IDS				WDR45B									ECT2				TAF9B
								NCOA4				MXRA7									TUBA1B				PLK4
								SPIN1				CADM4									CCNE2				ESCO2
								LAMTOR1				GAK									SUV39H1				GEMIN2
								CAPG				BFSP1									SPC24				CHEK1
								GPR56				CRLF1									TMEM26				PICK1
								TMOD3				KCTD10									NES				PAGR1
								ARL8A				PCNXL3									BORA				KIAA1731
								GATA3				FBXO33									FGFR4				TMEM246
								DAZAP2				DNAJB11									EXOSC2				SPAG1
								PIAS3				BSDC1									GAS2L3				ZNF567
								CCS				REXO1									RFC5				ZSWIM5
								ARHGEF12				STAT3									EPHA7				ST8SIA4
								STAG2				DEXI									ZMYND10				SHCBP1
								TKT				PEBP1									CENPO				OSGEPL1
								KRT7				C19orf52									RPP25				AKTIP
								QPRT				DYNLRB1									P2RX5				POLD3
								MED13				DAPK1									NOLC1				DCK
								TSPYL1				HYOU1									CD320				ZIC2
								WIPF2				INPP5A									GSG2				NEK3
								BAG3				MOB3A									ANKRD32				KLHL4
								WWP2				SFSWAP									SOX2				ANP32C
								CLIC3				CAMKK1									C21orf58				KCNS3
								LYPLA2				MAP1LC3B2									DNAJC9				CEP57
								C6orf89				FEZ1									FANCE				SLC25A40
								CST3				DAP									INCENP				TNFAIP8L1
								FAM83H				RNF181									MAP1A				ZFP1
								CDC42BPB				UBFD1									CCDC150				RFC4
								TIMP2				LINC00667									H2AFX				ZBED5
								GSTZ1				FAU									SNORA57				ENPP4
								ENTPD6				DDX49									VPS9D1-AS1				FNBP1L
								CELSR1				CRABP2									PARPBP				VLDLR
								RAD23B				RNF185									MT1X				EXO1
								LAMTOR4				NSD1									CACYBP				ANP32AP1
								DNM2				EIF1									NXPH4				GPR180
								PRSS8				RAD54L2									POC1A				SFR1
								TM7SF2				IFT20									UHRF1				SCML2
								GSTM4				ECE1									HAUS4				NFIB
								CUX1				RSRP1									TONSL				MEIS2
								DCTN5				CCDC124									HNRNPA2B1				TNFRSF11B
								NCOA3				RPS27									ADM5				KCTD15
								PXN				NAA38									HPRT1				KCNJ2
								ITGB4				RPS9									CENPH				TPD52
								PTPRF				ZKSCAN1									MARC1				ZFAND1
								SDC1				EBNA1BP2									DSN1				STEAP1
												PLEKHB2									ADAM11				SNTB1
												ARHGAP17									ATAD3B				UBE2T
												B4GALNT2									CTSC				C1orf112
												ADORA2B									FBXO5				TRDMT1
												ETS2									LOC642846				CLSPN
												COX6A1									CHRNA5				BRCA1
												APOBEC3G									GLB1L2				PNMA2
												ANAPC15									ADCY3				TMEM62
												AKAP8L									AURKAPS1				KCNMB4
												RPL36									AKAP5				ZNF112
												ZCCHC14									HNRNPD				MCOLN3
												RGAG4									CDKN2C				CEP152
												ABCA1									DOK1				NKX2-1
												GMEB1									SNHG10				FBXO21
												BRK1									KIF20B				KHK
												PPP6R1									GPER1				SETDB2
												PABPC4									CEP192				PNPT1
												CYB561A3									C19orf81				LRRCC1
												CTSD									DLL1				YEATS2
												RFK									COCH				CMAHP
												OAF									CCDC18				SH3D19
												PFKFB3									DUSP2				PGAP2
												ITPRIPL2									CHAF1A				TRPC3
												LINC00909									CDT1				KIF14
												PLBD2									TTF2				SOX30
												ATG16L1									CCDC19				UNG
												BSG									SYCE2				GTPBP8
												FBRSL1									JADE1				RTKN2
												MAP2K2									RADIL				FAR2
												COX8A									NPTX1				ZFP69
												POLR2F									SNORD104				FANCL
												C6orf120									HPDL				CYP2R1
												PTRHD1									STIL				FAM161A
												RAB34									CKS1B				E2F8
												BTG1									DONSON				GPR1
												SP2									XRCC2				PAQR3
												IER2									SNORA76C				RFC5
												SH3BP5L									METTL7B				WDHD1
												ZNF324									TNFRSF25				DONSON
												GIPC3									NRGN				FAM169A
												ARL6IP4									KCNIP3				ZNF367
												RBM33									ZNF367				BRIP1
												FTH1									MYO19				CEP162
												SQSTM1									SLC39A8				METTL18
												ITM2C									BCL2				TTC27
												ARHGEF18									FANCG				TMEM182
												MYL9									RAD54B				VGLL3
												HLA-L									RIBC2				POLQ
												NDUFA2									GEN1				HOXC4
												UQCRH									MDC1				L3MBTL3
												ELK1									DTL				TRIT1
												CANT1									CDC25A				OTX1
												FLNA									CNIH2				EVI2A
												NPIPB5									CENPA				ZMYM3
												SUPV3L1									CENPI				DNA2
												UBXN7									CALML4				SYTL4
												CHMP1B									PSIP1				CHAF1B
												DLGAP4									MAP2K6				HLTF
												DUSP11									RHEBL1				FOXG1
												NDUFA1									LRRC26				ST3GAL6
												USP36									SMC2				DEPDC1B
												TAP1									POLA1				GUCY1B3
												SEPN1									DHTKD1				IMPA2
												UBA52									C5orf34				PLK1
												SLC7A11									TIPIN				AMIGO2
												PLEKHM1									ESAM				PATZ1
												HDAC4									TEAD4				NMU
												SLU7									SLITRK6				KIF11
												VDR									PAICS				DZANK1
												LAMA5									POLR3G				PRKD1
												ARHGDIA									KCNJ3				CDC7
												FAM53B									ITGA2B				BARD1
												GSTZ1									OVOL2				PAQR4
												CERS5									TERT				NAP1L2
												FHL2									TMPO				RAD54B
												RPS10									GPX8				LMNB1
												TINAGL1									VRK1				KIF20A
												FKBP1A									RBL1				STX11
												BANP									MIS18BP1				OAS1
												COX7A2L									POLD1				TMEM144
												PES1									MASTL				DEPDC1
												IPO13									PTPRG-AS1				PSMC3IP
												RCL1									OIP5				TMPO
												ALPL									RCN3				IPO8
												SURF4									ZGRF1				TTK
												PSMD7									HJURP				GPX8
												BAIAP2									DNA2				DUS4L
												MYEOV2									FAM83D				PHKA1
												BUD31									ZNF534				NCAPG
												RPS16									SKP2				WDR76
												ASB6									CEP152				FIGNL1
												GAS7									TMEM194B				ARHGAP19
												VASN									CDC7				ATG4C
												CDC37									SMC4				PHLDB2
												POMGNT1									DHRS13				HOXA3
												NLK									BRINP3				ASPM
												UBC									LHX4				CCDC138
												RAB1B									SLITRK4				RASEF
												BMP1									LRRCC1				KIAA1524
												CHP1									LOXL3				GKAP1
												RPL28									BARD1				LMBRD1
												ACO2									UNG				SFXN4
												HLA-H									MCM4				IL18
												ACTN4									RFC3				ANKRD32
												EMC10									FANCD2				C14orf93
												BRD4									GALNT16				FANCF
												RPL23									NASP				HOXA10
												MTFR1L									C17orf53				HOXB2
												DIDO1									SPSB4				LRRC40
												FASN									PCDH10				GPRASP1
												TXN									DPF1				ODF2L
												GNAI2									ARHGAP33				LIG4
												ATOX1									RNASEH2A				ZNF32
												MDK									MCM5				SCRN3
												LUZP1									ANP32E				ZEB1
												PSMC1									CAMK2N2				NCAPH
												HPCAL1									RDM1				CCNB1
												IFI27L2									PLK4				DHRS13
												BRF2									AARD				CC2D2A
												PIP4K2B									USP51				CCNA2
												CTDP1									FEN1				SLC6A15
												LENG8									GINS1				SIPA1
												FCHSD2									TIMELESS				SGMS2
												RPL39									C16orf59				XRCC6BP1
												COMT									NRM				NXPH2
												GDI1									PEG10				HEXIM2
												RPL14									WDHD1				ZNF232
												PNPO									CENPJ				NDRG4
												GGT5									PSRC1				PDCD2L
												NOL6									MTHFD1				SHMT1
												ING1									RACGAP1				EPOR
												PLD3									RFC2				TRMT11
												CIC									H2AFZ				MARCH9
												NAPA									KNSTRN				ACOT4
												MTF1									IGFLR1				CCDC112
												RTF1									DUSP9				HNMT
												SREBF2									ESCO2				KCTD12
												DRAP1									KIF22				SAPCD2
												TERF2									RFC4				LMCD1
												UBE2O									MTFR2				ALKBH8
												BRPF1									CHAF1B				DLX6
												ZKSCAN5									KIAA1524				HMX2
												NFATC3									FAM161A				DSCC1
												COA6									AURKA				CACNB3
												PELO									SEMA3D				MAGI2-AS3
												SEC13									LINC00669				SLC1A1
												RHBDD3									SGOL2				MSH2
												PSMD13									SPDL1				ZNF48
												ATP6V0B									NCAPD3				MIPOL1
												STK35									POLA2				IFT81
												NENF									RECQL4				ORC2
												INPP1									KIF24				TMEM154
												TBC1D20									CDCA2				GPR137C
												MAPKBP1									MCM8				TMEM180
												IL6R									LOC100288637				EVI2B
												SEMA7A									FLT4				HOXA11
												CLEC3B									KIF18A				KIF16B
												RPL13									KIF4B				RTN4IP1
												SETD3									TMPO-AS1				MORN4
												HDLBP									DUT				UBXN2B
												SUPT4H1									CKAP2L				MKS1
												SLC39A11									PHF19				NUF2
												ERLIN2									ERCC6L				HOXB3
												HMGXB3									WDR76				RAB27B
												CFL1									TTK				SIX4
												YBX1									HELLS				ZNF521
												DKK3									CLSPN				DUSP19
												HLA-C									MMP16				ZC4H2
												MUL1									ARHGAP11A				BEND3
												CTSB									MCM7				EDNRA
												SIK2									TRAIP				PDGFRA
												RBM3									C11orf82				BUB1
												RPS21									CHEK1				C19orf44
												CMIP									IL17RB				MFSD6
												RPS20									POLE				PBK
												KMT2D									E2F8				PIGB
												RPS5									SGOL1				AARD
												SNED1									ORC6				KIF18A
												PEAK1									TOP2A				SPSB4
												PDGFRB									CDCA8				CENPE
												TOM1L2									KCNJ2				SOX11
												USP32									CENPM				MDM1
												PSMB7									LMNB1				TBC1D4
												DNAJB6									FAM133A				BUB1B
												TOP1									PTTG2				ZNF772
												PHRF1									NCAPG2				KIF15
												AMZ2									CDC6				DNAJB5
												LARP4B									CNTRL				RPS6KA6
												CSNK1G1									ATAD2				C10orf35
												ATP5EP2									BRCA2				LRRC8B
												LUC7L3									PSMC3IP				ABHD8
												CCDC3									ARHGEF39				CASD1
												LEPREL1									DBF4B				CA2
												RPS24									ASF1B				NEIL3
												RPL32									CEP55				RASSF7
												C14orf2									KHK				ZFP37
												INF2									CENPK				HAUS1
												TBC1D16									CTNNAL1				TOMM40L
												TIMP2									ZWINT				GCA
												PDLIM1									CCM2L				PARP2
												SPRY4									TICRR				INSIG2
												PLXNA2									CENPU				CRISPLD1
												GRPEL1									E2F1				MIS18BP1
												LHPP									DEPDC1				TRIM6
												CHKA									FANCA				TADA1
												NABP1									MCM6				DLG3
												FTL									MXD3				CDCA7
												FSTL3									PRIM1				PRIM1
												EMID1									MYBL2				SYT11
												FIS1									FAM111B				SPIN4
												CYTH1									FANCI				CNTRL
												PINK1-AS									KIF23				EEF1E1
												ATG2A									ORC1				DCLRE1A
												RPS13									DEPDC1B				LRAT
												RALBP1									MELK				SOBP
												SIL1									PKMYT1				PRMT6
												FYN									RAD51AP1				FAM26E
												MYL6									SKA1				C2orf72
												ETV6									SKA3				SASS6
												TFB2M									CENPE				MTFR2
												CORO1B									DSCC1				MANEA
												ITGA3									CSPG5				PTGER2
												PDCD7									CDCA5				PAX6
												SLC7A6OS									CDC25C				CXADR
												PDXK									FAM72B				REEP1
												NDUFB2									CENPF				ETV1
												PRDX5									PTTG3P				CCDC181
												GOLGA2									MCM10				ARL6
												ZNF622									TK1				SV2A
												DNAJB1									E2F2				MMACHC
												CPQ									MND1				FBXO5
												KIAA0232									TRIP13				SLC25A12
												PDCD6									ANLN				IFI44
												RPL19									UBE2T				TMEM102
												RPL18									TPX2				PLS1
												PTPN1									RAD51				MCM6
												EDEM1									FOXM1				ATP6V0E2-AS1
												NUCB1									KNTC1				ARG2
												RPS2									KIFC1				ATL1
												P4HB									KIF15				EXOC6
												CPZ									TROAP				YEATS4
												GPAA1									EXO1				PRKAA2
												RPL3									PRR11				NEK2
												ANGPTL2									PTTG1				POLE2
												DCXR									GPR19				DLK2
												USP40									CASC5				GDPGP1
												PSMD8									BRIP1				ENPP5
												SF3B5									BRCA1				CCNE2
												GNPTG									CCNB1				ZDHHC13
												PSMA6									SHCBP1				FAM221A
												RPS7									GINS2				RANBP6
												NDUFV3									POLQ				TAF5
												TFIP11									POLE2				CHMP4C
												RND3									CDCA7L				P2RX7
												RBP4									MCM3				TMEM71
												EEF1D									HMGB2				CAND2
												COQ10B									TCF19				SPICE1
												CRK									UBE2C				NFATC4
												SMG6									WDR62				HOXA7
												RPS11									NEIL3				TDRD7
												PHLDA1									KIF11				H1F0
												OGFOD3									GTSE1				IFIT1
												CEP170B									PRC1				STEAP2
												MRPS25									CDCA7				DLGAP5
												ASS1									NUSAP1				USP51
												TIMP1									CIT				HOXA2
												CCDC174									CDK1				SSX2IP
												VAT1									MCM2				FAM111B
												IGFBP6									NDC80				SLFN11
												RHOA									CCNB2				MPP2
												GALNS									MAD2L1				PRRX1
												CSNK2B									BLM				CNKSR2
												PITPNA									CDKN3				ZNF711
												ATP6V1E1									KIF18B				STAMBPL1
												AHSA1									BIRC5				AKAP5
												ATG4B									NCAPG				ZNF678
												TAGLN2									SPAG5				MNS1
												PTPN14									ESPL1				ARMCX2
												PPP1R7									SPC25				BEND5
												NDUFB8									PLK1				E2F5
																					NEK2				JAKMIP2
																					NUF2				SALL2
																					NCAPH				C3AR1
																					RAD54L
																					CDC20
																					BUB1B
																					BUB1
																					IQGAP3
																					CCNA2
																					CDC45
																					ASPM
																					KIF14
																					TACC3
																					MNS1
																					RRM2
																					PIF1
																					DLGAP5
																					KIF2C
																					KIF4A
																					MKI67
																					AURKB
																					HMMR
																					FAM64A
																					CDCA3
																					DMC1
																					PBK
																					KIF20A
