# Supplementary material for: Identification of a core TP53 transcriptional program with highly distributed tumor suppressive activity
Source: HighWire-hosted journal article supplement (doi:10.1101/gr.220533.117), 2017-09-13
Supplement: Supplemental_File_S6.xlsx [file Supplemental_File_S6.xlsx]

## Sheet: Direct p53 target genes
	TP53 direct target genes (core program highlihgted in blue, novel targets in italics)	Cell line			Short description	Accession (based on GRO-seq)			TP53 binding within 2.5kb from TSS			TP53 peak chr	TP53 peak start	TP53 peak end	TP53 peak center distance from TSS	TP53 motif	TP53 peak chr	TP53 peak start	TP53 peak end	TP53 peak center distance from TSS	TP53 motif	TP53 peak chr	TP53 peak start	TP53 peak end	TP53 peak center distance from TSS	TP53 motif	polysomal RNA-seq FC	polysomal RNA-seq padj	polysomal RNA-seq FC	polysomal RNA-seq padj	polysomal RNA-seq FC	polysomal RNA-seq padj	Core gene	Previously reported target
						HCT116	MCF7	SJSA				HCT116					MCF7					SJSA					HCT116		MCF7		SJSA
	ABCA12	HCT116	MCF7	SJSA	ATP binding cassette subfamily A member 12	NM_173076	NM_173076	NM_173076	HCT116	MCF7	SJSA	chr2	216002557	216002779	484	yes	chr2	216002549	216002769	493	yes	chr2	216002565	216002775	482	yes	13.6592	9.08015e-22	5.68915	1.02742e-49	25.8622	9.19059e-12	Y	Y
	ACER2	HCT116	MCF7	SJSA	alkaline ceramidase 2	NM_001010887	NM_001010887	NM_001010887																			4.44117	1.07417e-08	3.34429	2.38107e-06	9.46571	4.96892e-07	Y	Y
	ADIRF		MCF7		adipogenesis regulatory factor		NM_006829			MCF7							chr10	88728217	88728437	139	yes						1.92315	0.000521852	1.65858	0.000134569	6.6759	6.69502e-05	Y	N
	AMZ2	HCT116			archaelysin family metallopeptidase 2	NM_001033572			HCT116			chr17	66244689	66244911	655	yes											2.19943	6.26253e-07	2.30047	9.70852e-17	1.736	0.0270308	Y	Y
	AMZ2P1	HCT116			archaelysin family metallopeptidase 2 pseudogene 1	NR_026903			HCT116			chr17	62970990	62971212	603	no											2.17651	5.254e-05	1.98981	0.000111427	2.28533	0.0102585	Y	Y
	ANKRA2	HCT116	MCF7		ankyrin repeat, family A (RFXANK-like), 2	NM_023039	NM_023039		HCT116			chr5	72861134	72861356	267	yes											3.27806	1.48275e-11	2.28384	7.53993e-07	2.81859	7.21228e-05	Y	Y
	ANXA4	HCT116	MCF7	SJSA	annexin A4	NM_001153	NM_001153	NM_001153																			1.60387	0.0111116	2.28671	8.53256e-13	2.08341	0.00787638	Y	Y
	APOBEC3C	HCT116			apolipoprotein B mRNA editing enzyme, catalytic polypeptide-like 3C	NM_014508			HCT116			chr22	39410542	39410764	388	yes											3.39223	2.30151e-15	19.7282	6.74464e-48	4.59525	6.30813e-12	Y	Y
	APOBEC3H	HCT116	MCF7	SJSA	apolipoprotein B mRNA editing enzyme, catalytic polypeptide-like 3H	NM_001166004	NM_001166004	NM_001166004	HCT116	MCF7	SJSA	chr22	39493188	39493410	111	yes	chr22	39493184	39493404	110	yes	chr22	39493200	39493410	105	yes	3.52911	7.2343e-05	3.17139	0.000142419	33.1591	2.45821e-17	Y	Y
	ASCC3	HCT116	MCF7	SJSA	activating signal cointegrator 1 complex subunit 3	NM_022091	NM_022091	NM_022091	HCT116	MCF7	SJSA	chr6	101328692	101328914	446	yes	chr6	101328698	101328918	441	yes	chr6	101328690	101328900	454	yes	2.02626	8.91148e-06	2.00245	1.66369e-07	2.12976	0.003774	Y	Y
	ATF3	HCT116		SJSA	activating transcription factor 3	NM_001206488		NM_001206488																			2.63176	1.34787e-08	4.40965	2.8235e-12	14.2274	5.67821e-33	Y	Y
	BAX	HCT116	MCF7	SJSA	BCL2-associated X protein	NM_001291430	NM_138761	NM_138761	HCT116	MCF7	SJSA	chr19	49458371	49458593	365	yes	chr19	49458359	49458579	352	yes	chr19	49458374	49458584	362	yes	3.08408	5.09795e-14	2.94078	1.92043e-28	5.02687	3.34853e-09	Y	Y
	BBC3	HCT116	MCF7	SJSA	BCL2 binding component 3	NM_001127242	NM_001127242	NM_001127242	HCT116	MCF7	SJSA	chr19	47735727	47735949	186	yes	chr19	47735716	47735936	198	yes	chr19	47735720	47735930	199	yes	3.97801	3.84871e-20	3.4938	4.65303e-28	30.3402	1.34146e-44	Y	Y
	BLCAP		MCF7		bladder cancer associated protein		NM_001167820			MCF7							chr20	36154776	36154996	1448	no						2.56034	7.91461e-09	2.18278	1.36256e-13	4.17756	2.13499e-08	Y	Y
	BLOC1S2	HCT116	MCF7	SJSA	biogenesis of lysosomal organelles complex-1, subunit 2	NM_001282439	NM_001282439	NM_001282439	HCT116	MCF7	SJSA	chr10	102045791	102046013	568	no	chr10	102045789	102046009	571	no	chr10	102045791	102046001	574	no	3.14219	6.34198e-11	2.60307	2.35449e-18	4.47309	2.33843e-08	Y	Y
	BTG2	HCT116	MCF7	SJSA	BTG family member 2	NM_006763	NM_006763	NM_006763	HCT116	MCF7	SJSA	chr1	203275670	203275892	1117	yes	chr1	203275698	203275918	1144	yes	chr1	203275708	203275918	1149	yes	7.11	3.86521e-43	4.04209	3.3566e-24	25.6762	2.57251e-51	Y	Y
	C12orf5	HCT116	MCF7	SJSA	TIGAR, TP53 Induced Glycolysis Regulatory Phosphatase	NM_020375	NM_020375	NM_020375																			2.44982	5.15938e-08	3.37925	2.10823e-25	4.65845	5.19736e-12	Y	Y
	C19orf82	HCT116	MCF7		ZNF561 Antisense RNA 1	NM_001242812	NM_001242812		HCT116			chr19	9732607	9732829	560	yes											4.98685	4.34789e-15	2.61599	1.21073e-05	2.77	0.00258294	Y	N
	C9orf169	HCT116	MCF7	SJSA	CYSRT1, Cysteine-Rich Tail Protein 1	NM_199001	NM_199001	NM_199001	HCT116	MCF7	SJSA	chr9	140120458	140120680	1482	yes	chr9	140120467	140120687	1490	yes	chr9	140120485	140120695	1503	yes	5.03017	1.64235e-16	5.35613	1.97497e-56	25.1543	1.61196e-29	Y	N
	CCNG1	HCT116	MCF7	SJSA	cyclin G1	NM_199246	NM_199246	NM_199246	HCT116	MCF7	SJSA	chr5	162864804	162865026	338	yes	chr5	162864819	162865039	352	yes	chr5	162864825	162865035	353	yes	2.72241	8.36776e-11	2.46488	1.01704e-11	2.12226	0.00174356	Y	Y
	CD82	HCT116	MCF7		CD82 molecule	NM_001024844	NM_001024844		HCT116	MCF7		chr11	44586194	44586416	837	yes	chr11	44586232	44586452	800	yes						3.64578	1.78201e-13	4.23518	6.49423e-20	3.44413	3.4464e-08	Y	Y
	CDC42SE1		MCF7		CDC42 small effector 1		NM_001038707			MCF7							chr1	151031222	151031442	794	yes						1.46258	0.0367751	1.76806	3.68222e-08	2.11579	0.00773605	Y	N
	CDIP1	HCT116			cell death-inducing p53 target 1	NM_001199055			HCT116			chr16	4586689	4586911	2017	yes											2.61028	2.28196e-06	7.34461	2.52117e-09	2.65432	0.000132803	Y	Y
	CDKN1A	HCT116	MCF7	SJSA	cyclin-dependent kinase inhibitor 1A (p21, Cip1)	NM_000389	NM_001291549	NM_001291549	HCT116	MCF7	SJSA	chr6	36644121	36644343	2225	yes	chr6	36644125	36644345	2222	yes	chr6	36644125	36644335	2227	yes	10.2114	2.46662e-65	7.88753	9.80391e-93	34.5288	5.8786e-65	Y	Y
	CEL	HCT116	MCF7	SJSA	carboxyl ester lipase	NM_001807	NM_001807	NM_001807	HCT116	MCF7	SJSA	chr9	135936614	135936836	641	no	chr9	135936614	135936834	642	no	chr9	135936607	135936817	654	no	2.9667	0.00489769	20.5652	9.46602e-55	13.8215	4.77243e-14	Y	Y
	CMBL	HCT116	MCF7		carboxymethylenebutenolidase homolog (Pseudomonas)	NM_138809	NM_138809		HCT116	MCF7		chr5	10307587	10307809	471	yes	chr5	10307581	10307801	478	yes						2.97378	7.47136e-14	6.72927	7.66143e-78	6.47989	3.86712e-16	Y	Y
	CSNK1G1	HCT116	MCF7		casein kinase 1, gamma 1	NM_022048	NM_022048		HCT116	MCF7		chr15	64647178	64647400	1154	yes	chr15	64647195	64647415	1138	yes						1.55313	0.0146036	1.92505	1.28355e-06	1.73354	0.0445907	Y	Y
	CYFIP2	HCT116	MCF7	SJSA	cytoplasmic FMR1 interacting protein 2	NM_001037333	NM_001037333	NM_001037333	HCT116			chr5	156693238	156693460	259	no											4.16074	9.52344e-23	3.71528	1.05379e-36	8.76491	2.30727e-24	Y	Y
	DCP1B	HCT116	MCF7	SJSA	decapping mRNA 1B	NM_152640	NM_152640	NM_152640	HCT116	MCF7	SJSA	chr12	2113718	2113940	152	yes	chr12	2113725	2113945	158	yes	chr12	2113714	2113924	142	yes	1.63424	0.0140158	1.63482	0.00283374	1.71635	0.0427159	Y	Y
	DDB2	HCT116	MCF7	SJSA	damage-specific DNA binding protein 2	NM_000107	NM_000107	NM_000107	HCT116	MCF7	SJSA	chr11	47236427	47236649	111	no	chr11	47236430	47236650	110	no	chr11	47236440	47236650	105	no	1.97981	0.000131252	3.5595	1.72825e-38	3.12929	1.84631e-06	Y	Y
	DDIT4	HCT116			DNA damage inducible transcript 4	NM_019058																					1.50074	0.0174025	2.86899	1.37139e-25	7.8453	3.04789e-21	Y	Y
	DGKA	HCT116			diacylglycerol kinase alpha	NM_001345																					2.91735	2.56573e-08	3.78669	1.39307e-16	3.05497	3.45028e-06	Y	Y
	DRAM1	HCT116	MCF7	SJSA	DNA damage regulated autophagy modulator 1	NM_018370	NM_018370	NM_018370	HCT116	MCF7	SJSA	chr12	102271220	102271442	226	no	chr12	102271227	102271447	232	no	chr12	102271223	102271433	223	no	3.68196	9.61297e-19	2.27334	5.37268e-14	3.51479	5.70948e-08	Y	Y
	DUSP14	HCT116			dual specificity phosphatase 14	NM_007026																					1.71469	0.00109153	1.35191	0.0328431	4.14183	1.87899e-10	Y	Y
	EFNB1	HCT116			ephrin-B1	NM_004429																					1.81912	0.000415684	2.19096	5.51082e-08	8.77715	1.87774e-24	Y	Y
	EI24	HCT116	MCF7		etoposide induced 2.4	NR_110769	NR_110769		HCT116	MCF7		chr11	125439285	125439507	113	no	chr11	125439277	125439497	110	no						2.18317	3.23402e-06	1.83134	9.31211e-09	2.28356	0.00170549	Y	Y
	EPS8L2	HCT116	MCF7		EPS8-like 2	NM_022772	NM_022772		HCT116	MCF7		chr11	706914	707136	905	yes	chr11	706909	707129	899	yes						2.5463	1.79815e-09	2.46802	3.78578e-19	88.2923	5.11525e-48	Y	Y
	ETV7			SJSA	ets variant 7			NM_001207040																			2.10744	0.0122832	2.10134	0.0313901	7.02377	8.76843e-15	Y	Y
	FAM210B	HCT116		SJSA	family with sequence similarity 210 member B	NM_080821		NM_080821	HCT116		SJSA	chr20	54934759	54934981	887	yes						chr20	54934776	54934986	898	yes	3.38446	1.43201e-11	2.98085	3.80969e-29	4.23253	7.46552e-09	Y	Y
	FAM212B	HCT116	MCF7	SJSA	family with sequence similarity 212 member B	NM_019099	NM_019099	NM_019099		MCF7							chr1	112281117	112281337	820	no						4.58096	5.91915e-20	3.84853	4.16222e-33	4.47695	4.6414e-10	Y	Y
	FAS	HCT116	MCF7	SJSA	Fas cell surface death receptor	NM_152871	NM_152871	NM_152871	HCT116	MCF7	SJSA	chr10	90750960	90751182	783	yes	chr10	90750963	90751183	785	yes	chr10	90750964	90751174	781	yes	5.06057	8.44409e-22	11.038	5.4289e-38	4.64287	1.26364e-10	Y	Y
	FBXO22	HCT116	MCF7	SJSA	F-box protein 22	NR_037623	NR_037623	NR_037623	HCT116	MCF7	SJSA	chr15	76196305	76196527	216	no	chr15	76196362	76196582	272	no	chr15	76196365	76196575	270	no	1.94316	2.86662e-05	2.17576	7.67409e-13	2.53705	6.00475e-05	Y	Y
	FDXR	HCT116	MCF7	SJSA	ferredoxin reductase	NM_001258014	NM_001258014	NM_001258016		MCF7							chr17	72868972	72869192	110	no						3.61405	2.99488e-19	7.43839	6.81073e-92	16.5604	3.0272e-41	Y	Y
	FHL2	HCT116			four and a half LIM domains 2	NM_001450																					1.96024	1.11592e-05	5.84582	2.95399e-50	1.83794	0.0117815	Y	Y
	GADD45A	HCT116	MCF7	SJSA	growth arrest and DNA damage inducible alpha	NM_001199741	NM_001199741	NM_001199741	HCT116	MCF7	SJSA	chr1	68152353	68152575	1604	yes	chr1	68152362	68152582	1612	yes	chr1	68152371	68152581	1616	yes	2.54982	1.00731e-09	4.14209	4.2117e-28	5.60018	3.3416e-15	Y	Y
	GATS		MCF7		GATS, stromal antigen 3 opposite strand		NR_028039			MCF7							chr7	99869792	99870012	110	yes						3.3566	5.22375e-11	2.37105	1.18749e-12	2.63345	0.00255084	Y	Y
	GDF15	HCT116	MCF7	SJSA	growth differentiation factor 15	NM_004864	NM_004864	NM_004864	HCT116		SJSA	chr19	18496882	18497104	111	yes						chr19	18496937	18497147	105	yes	4.06292	1.16511e-22	6.16354	9.91583e-53	195.804	3.43333e-125	Y	Y
	GPR87	HCT116	MCF7	SJSA	G protein-coupled receptor 87	NM_023915	NM_023915	NM_023915	HCT116	MCF7	SJSA	chr3	151033752	151033974	774	yes	chr3	151033754	151033974	773	yes	chr3	151033759	151033969	773	yes	11.5452	6.94032e-45	7.22484	6.65436e-39	8.46057	3.21774e-09	Y	Y
	GRIN2C	HCT116	MCF7		glutamate receptor, ionotropic, N-methyl D-aspartate 2C	NM_001278553	NM_000835																				2.98767	0.00418939	2.92657	0.00200301	6.23028	0.000336842	Y	Y
	HES2	HCT116	MCF7		hes family bHLH transcription factor 2	NM_019089	NM_019089																				5.18357	1.15329e-26	6.20736	1.01116e-66	101.917	4.32234e-44	Y	Y
	IKBIP	HCT116	MCF7	SJSA	IKBKB interacting protein	NM_153687	NM_153687	NM_153687																			2.86595	3.26746e-10	3.11744	7.36185e-15	1.71928	0.0432715	Y	Y
	INPP1	HCT116			inositol polyphosphate-1-phosphatase	NM_002194																					1.5966	0.00986551	2.40635	0.000239277	1.76215	0.0236219	Y	Y
	ISCU	HCT116	MCF7		iron-sulfur cluster assembly enzyme	NM_213595	NM_213595		HCT116			chr12	108956675	108956897	492	yes											2.23826	1.04506e-06	2.4887	1.72675e-17	3.06374	8.94525e-06	Y	Y
	KANK3	HCT116			KN motif and ankyrin repeat domains 3	NM_198471																					2.67997	8.41613e-08	24.4075	7.79486e-78	32.4006	6.07809e-31	Y	Y
	KIAA0247	HCT116	MCF7	SJSA	SUSD6, Sushi Domain Containing 6	NM_014734	NM_014734	NM_014734	HCT116	MCF7	SJSA	chr14	70079573	70079795	1374	yes	chr14	70079606	70079826	1406	yes	chr14	70079612	70079822	1407	yes	2.55471	9.70829e-08	1.98652	2.92241e-07	5.36821	1.10732e-13	Y	Y
	KLHDC7A		MCF7	SJSA	kelch domain containing 7A		NM_152375	NM_152375		MCF7	SJSA						chr1	18807473	18807693	159	yes	chr1	18807480	18807690	161	yes	2.50464	0.0060618	2.75727	5.81054e-05	6.92514	5.18899e-12	Y	Y
	KLHL30	HCT116			kelch like family member 30	NM_198582			HCT116			chr2	239049393	239049615	2141	yes											6.47087	3.22818e-08	5.91223	2.58802e-07	7.68133	2.14898e-18	Y	N
	LIF	HCT116	MCF7	SJSA	leukemia inhibitory factor	NM_001257135	NM_001257135	NM_001257135	HCT116	MCF7	SJSA	chr22	30641769	30641991	961	yes	chr22	30641764	30641984	967	yes	chr22	30641765	30641975	971	yes	2.48819	3.22818e-08	2.38564	6.74001e-09	3.16293	7.35621e-06	Y	Y
	LRP1	HCT116			LDL receptor related protein 1	NM_002332			HCT116			chr12	57521495	57521717	677	yes											2.9578	5.37109e-08	3.43879	9.2665e-23	2.44566	0.000153065	Y	Y
	MDM2	HCT116	MCF7	SJSA	MDM2 proto-oncogene, E3 ubiquitin protein ligase	NM_002392	NM_002392	NM_002392	HCT116	MCF7	SJSA	chr12	69202630	69202852	789	yes	chr12	69202637	69202857	795	yes	chr12	69202644	69202854	797	yes	5.7733	9.9812e-35	6.92408	7.54351e-82	7.76077	3.04789e-21	Y	Y
	NADSYN1	HCT116			NAD synthetase 1	NM_018161																					1.75454	0.00211146	1.56906	4.52775e-05	2.71321	3.04167e-05	Y	Y
	NINJ1		MCF7	SJSA	ninjurin 1		NM_004148	NM_004148		MCF7	SJSA						chr9	95895007	95895227	1454	no	chr9	95895017	95895227	1449	no	2.65124	3.46615e-08	1.99171	2.16437e-12	2.85457	0.00158473	Y	Y
	NUPR1	HCT116	MCF7	SJSA	nuclear protein 1, transcriptional regulator	NM_012385	NM_012385	NM_012385	HCT116	MCF7	SJSA	chr16	28548514	28548736	1871	yes	chr16	28548514	28548734	1872	yes	chr16	28548513	28548723	1878	yes	3.7681	0.000323826	11.6038	6.41471e-132	32.7688	8.14678e-37	Y	Y
	PANK1	HCT116	MCF7		pantothenate kinase 1	NM_148977	NM_148977		HCT116	MCF7		chr10	91404912	91405134	307	yes	chr10	91404919	91405139	301	yes						2.37768	2.67362e-06	1.56022	0.00501553	2.53482	0.00218599	Y	Y
	PARD6G	HCT116			par-6 family cell polarity regulator gamma	NM_032510			HCT116			chr18	78004183	78004405	1104	no											2.00396	6.30818e-05	1.50466	0.0086254	4.00613	8.4469e-08	Y	Y
	PGF	HCT116	MCF7	SJSA	placental growth factor	NM_002632	NM_002632	NM_002632	HCT116	MCF7	SJSA	chr14	75419793	75420015	2564	yes	chr14	75419787	75420007	2571	yes	chr14	75419798	75420008	2565	yes	2.02378	8.7693e-05	3.91484	3.58805e-09	17.2173	3.72319e-24	Y	Y
	PHLDA3	HCT116	MCF7	SJSA	pleckstrin homology-like domain, family A, member 3	NR_073080	NR_073080	NR_073080	HCT116	MCF7	SJSA	chr1	201438184	201438406	111	no	chr1	201438192	201438412	110	no	chr1	201438192	201438402	105	no	2.93014	5.87074e-13	2.35703	6.65234e-16	7.35628	1.36929e-19	Y	Y
	PHPT1	HCT116	MCF7		phosphohistidine phosphatase 1	NR_109808	NR_109808		HCT116	MCF7		chr9	139743826	139744048	669	no	chr9	139743860	139744080	702	no						2.13968	2.651e-06	1.78108	1.43534e-08	3.72318	9.73372e-08	Y	N
	PLK2	HCT116	MCF7	SJSA	polo-like kinase 2	NM_001252226	NM_001252226	NM_001252226	HCT116	MCF7	SJSA	chr5	57757997	57758219	2142	yes	chr5	57757995	57758215	2139	yes	chr5	57758006	57758216	2145	yes	4.8873	2.52085e-24	1.62303	9.98892e-06	3.02095	1.18176e-05	Y	Y
	PLK3	HCT116	MCF7	SJSA	polo-like kinase 3	NM_004073	NM_004073	NM_004073	HCT116	MCF7	SJSA	chr1	45265502	45265724	424	no	chr1	45265501	45265721	426	no	chr1	45265507	45265717	425	no	2.47148	1.11252e-08	3.1869	3.93564e-14	7.62938	8.93141e-20	Y	Y
	PNPO	HCT116			pyridoxamine 5'-phosphate oxidase	NM_018129			HCT116			chr17	46020032	46020254	1254	no											1.44409	0.0331388	1.69721	4.33475e-06	1.78498	0.0229892	Y	N
	POLH	HCT116	MCF7	SJSA	polymerase (DNA directed), eta	NM_001291969	NM_001291969	NM_001291969	HCT116	MCF7		chr6	43543873	43544095	111	no	chr6	43543881	43544101	113	no						2.21425	1.23362e-06	3.00894	6.07234e-19	4.1318	1.24219e-10	Y	Y
	PPM1D	HCT116	MCF7	SJSA	protein phosphatase, Mg2+/Mn2+ dependent 1D	NM_003620	NM_003620	NM_003620	HCT116	MCF7	SJSA	chr17	58677524	58677746	111	yes	chr17	58677529	58677749	110	yes	chr17	58677534	58677744	105	yes	1.75855	0.00275197	2.3558	2.82391e-18	3.85499	1.23837e-08	Y	Y
	PRDM1	HCT116	MCF7	SJSA	PR domain containing 1, with ZNF domain	NM_001198	NM_182907	NM_182907																			3.80147	9.73571e-05	2.26634	0.0409188	8.49652	8.22718e-19	Y	Y
	PRKAB1	HCT116	MCF7		protein kinase, AMP-activated, beta 1 non-catalytic subunit	NM_006253	NM_006253		HCT116	MCF7		chr12	120105725	120105947	111	yes	chr12	120105725	120105945	110	yes						2.01615	0.00012425	1.46859	0.00130457	3.62823	8.85631e-08	Y	Y
	PRKX	HCT116	MCF7		protein kinase, X-linked	NM_005044	NM_005044			MCF7							chrX	3630448	3630668	1118	no						2.67208	7.52447e-10	2.40256	1.70861e-15	3.52713	1.76963e-07	Y	Y
	PSTPIP2	HCT116	MCF7	SJSA	proline-serine-threonine phosphatase interacting protein 2	NM_024430	NM_024430	NM_024430	HCT116	MCF7	SJSA	chr18	43649571	43649793	2569	yes	chr18	43649586	43649806	2555	yes	chr18	43649571	43649781	2575	yes	2.34945	2.28731e-06	3.4395	1.63563e-17	5.67604	4.91369e-13	Y	Y
	PTP4A1	HCT116	MCF7	SJSA	protein tyrosine phosphatase type IVA, member 1	NM_003463	NM_003463	NM_003463	HCT116	MCF7	SJSA	chr6	64283524	64283746	1718	yes	chr6	64283525	64283745	1718	yes	chr6	64283525	64283735	1713	yes	2.32132	4.44267e-07	2.10595	1.13426e-09	3.25972	8.44488e-06	Y	Y
	RAP2B	HCT116	MCF7	SJSA	RAP2B, member of RAS oncogene family	NM_002886	NM_002886	NM_002886	HCT116	MCF7	SJSA	chr3	152878442	152878664	1449	yes	chr3	152878474	152878694	1418	yes	chr3	152878488	152878698	1409	yes	1.79919	0.00022839	3.34064	1.22396e-33	2.35968	0.000385952	Y	Y
	RNF19B	HCT116	MCF7		ring finger protein 19B	NM_153341	NM_153341			MCF7							chr1	33429395	33429615	782	yes						1.78311	0.00126792	1.72354	9.26211e-05	4.92213	6.68037e-13	Y	Y
	RPS27L	HCT116	MCF7	SJSA	ribosomal protein S27 like	NM_015920	NM_015920	NM_015920	HCT116	MCF7	SJSA	chr15	63449377	63449599	254	yes	chr15	63449347	63449567	285	yes	chr15	63449348	63449558	289	yes	4.57238	4.45886e-21	2.27378	0.0143654	2.90159	2.28143e-05	Y	Y
	RRM2B	HCT116	MCF7	SJSA	ribonucleotide reductase M2 B (TP53 inducible)	NM_015713	NM_015713	NM_015713	HCT116	MCF7	SJSA	chr8	103248966	103249188	2270	yes	chr8	103248967	103249187	2270	yes	chr8	103253105	103253315	1864	no	3.61738	1.15715e-14	4.02843	6.33834e-42	4.88752	9.63028e-13	Y	Y
	SERPINE1	HCT116		SJSA	serpin peptidase inhibitor, clade E (nexin, plasminogen activator inhibitor type 1), member 1	NM_000602		NM_000602	HCT116		SJSA	chr7	100770113	100770335	147	yes						chr7	100770128	100770338	138	yes	2.30075	9.43906e-07	3.16891	8.07869e-19	2.10554	0.00421932	Y	Y
	SERTAD1	HCT116	MCF7		SERTA domain containing 1	NM_013376	NM_013376		HCT116	MCF7		chr19	40931979	40932201	158	no	chr19	40931923	40932143	110	no						1.72093	0.00272355	2.14815	6.98281e-11	4.56008	4.82024e-11	Y	Y
	SESN1	HCT116	MCF7	SJSA	sestrin 1	NM_001199933	NM_001199933	NM_001199933	HCT116	MCF7	SJSA	chr6	109330131	109330353	517	yes	chr6	109330121	109330341	528	yes	chr6	109330113	109330323	541	yes	4.5184	1.2323e-20	3.17472	7.76714e-16	9.69885	8.56825e-25	Y	Y
	SESN2	HCT116	MCF7	SJSA	sestrin 2	NM_031459	NM_031459	NM_031459		MCF7							chr1	28586717	28586937	864	no						1.78535	0.00401219	2.64608	9.3583e-20	14.0034	3.79867e-36	Y	Y
	SULF2	HCT116	MCF7	SJSA	sulfatase 2	NM_001161841	NM_018837	NM_001161841	HCT116	MCF7		chr20	46413561	46413783	1689	yes	chr20	46413550	46413770	1701	yes						6.3217	9.62026e-24	2.07361	2.43446e-14	9.92023	1.39286e-18	Y	Y
	TGFA	HCT116		SJSA	transforming growth factor alpha	NM_003236		NM_003236																			2.3698	8.87231e-08	2.20998	6.07133e-07	3.8728	1.88022e-05	Y	Y
	TMEM63B	HCT116	MCF7		transmembrane protein 63B	NM_018426	NM_018426		HCT116	MCF7		chr6	44096452	44096674	1187	yes	chr6	44096478	44096698	1212	yes						2.3663	1.11252e-08	2.14638	2.59041e-12	1.96729	0.00626565	Y	Y
	TMEM68		MCF7		transmembrane protein 68		NM_001286660			MCF7							chr8	56684814	56685034	1043	yes						1.72332	0.00269326	2.0039	2.67209e-05	2.7494	6.46525e-05	Y	Y
	TNFRSF10B	HCT116	MCF7	SJSA	tumor necrosis factor receptor superfamily member 10b	NM_003842	NM_003842	NM_003842	HCT116	MCF7	SJSA	chr8	22926033	22926255	557	yes	chr8	22926041	22926261	550	yes	chr8	22926047	22926257	549	yes	2.23522	1.48867e-07	2.42233	3.1346e-14	4.08525	2.36239e-10	Y	Y
	TP53I3	HCT116	MCF7		tumor protein p53 inducible protein 3	NM_004881	NM_004881		HCT116			chr2	24307121	24307343	854	no											12.2971	1.12977e-68	23.4635	4.74072e-235	10.139	2.72878e-28	Y	Y
	TP53INP1	HCT116	MCF7	SJSA	tumor protein p53 inducible nuclear protein 1	NM_033285	NM_033285	NM_033285	HCT116	MCF7	SJSA	chr8	95961691	95961913	187	no	chr8	95961666	95961886	161	no	chr8	95961685	95961895	175	no	11.1036	1.30152e-50	5.7137	1.91948e-47	9.84257	6.32226e-24	Y	Y
	TRAF4	HCT116	MCF7	SJSA	TNF receptor associated factor 4	NM_004295	NM_004295	NM_004295	HCT116	MCF7	SJSA	chr17	27070044	27070266	869	yes	chr17	27070068	27070288	846	yes	chr17	27070060	27070270	859	yes	2.14622	5.14769e-06	1.95164	3.92323e-11	4.02574	3.61094e-09	Y	Y
	TRIAP1	HCT116	MCF7	SJSA	TP53 regulated inhibitor of apoptosis 1	NM_016399	NM_016399	NM_016399	HCT116	MCF7	SJSA	chr12	120884027	120884249	111	yes	chr12	120884039	120884259	110	yes	chr12	120884032	120884242	105	yes	2.85676	2.74306e-11	2.74589	8.93773e-20	5.67527	9.19076e-12	Y	Y
	TSKU	HCT116	MCF7	SJSA	tsukushi, small leucine rich proteoglycan	NM_001258210	NM_001258210	NM_015516	HCT116	MCF7	SJSA	chr11	76495650	76495872	2404	yes	chr11	76495646	76495866	2399	yes	chr11	76495653	76495863	2401	yes	1.64758	0.00384333	1.6994	4.96656e-07	5.65996	4.33821e-13	Y	Y
	WDR63	HCT116			WD repeat domain 63	NM_001288563			HCT116			chr1	85528285	85528507	415	yes											4.22851	3.31278e-06	2.33823	0.0322041	7.79986	4.01393e-05	Y	Y
	XPC	HCT116	MCF7	SJSA	xeroderma pigmentosum, complementation group C	NM_001145769	NM_001145769	NM_001145769	HCT116	MCF7	SJSA	chr3	14219957	14220179	111	no	chr3	14219969	14220189	110	no	chr3	14219954	14220164	114	no	1.70027	0.00858516	2.06587	2.67545e-11	3.21601	6.74982e-06	Y	Y
	ZMAT3	HCT116	MCF7	SJSA	zinc finger, matrin-type 3	NM_152240	NM_152240	NM_152240	HCT116	MCF7	SJSA	chr3	178787866	178788088	1680	yes	chr3	178787865	178788085	1682	yes	chr3	178787869	178788079	1683	yes	4.48448	1.13719e-18	5.76509	1.74682e-55	3.89535	1.55749e-09	Y	Y
	ZNF337	HCT116	MCF7	SJSA	zinc finger protein 337	NM_015655	NM_015655	NM_015655	HCT116		SJSA	chr20	25676643	25676865	787	no						chr20	25676648	25676858	788	no	1.79801	0.00135406	1.57668	0.0043389	2.14404	0.00463775	Y	Y
	ZNF385A			SJSA	zinc finger protein 385A			NM_001130967																			1.74962	0.000563961	3.01367	1.28863e-29	3.94157	6.53379e-07	Y	Y
	ZNF561	HCT116			zinc finger protein 561	NM_152289			HCT116			chr19	9732607	9732829	802	yes											2.23766	1.37e-06	2.73747	2.21911e-10	3.29386	3.05652e-06	Y	Y
	ZNF79	HCT116	MCF7	SJSA	zinc finger protein 79	NM_001286697	NM_001286697	NM_001286697	HCT116	MCF7	SJSA	chr9	130186686	130186908	144	yes	chr9	130186741	130186961	198	yes	chr9	130186756	130186966	208	yes	2.25361	3.33268e-05	2.39296	1.22244e-06	4.91855	9.46978e-11	Y	Y
	ABCB9	HCT116		SJSA	ATP binding cassette subfamily B member 9	NM_001243014		NM_019624	HCT116		SJSA	chr12	123453210	123453432	2265	yes						chr12	123453203	123453413	2252	yes	1.63149	0.0112907	0.83368	0.361471	2.8951	7.7556e-06	N	Y
	ACTA2	HCT116	MCF7		actin, alpha 2, smooth muscle, aorta	NM_001141945	NM_001141945		HCT116	MCF7	SJSA	chr10	90750960	90751182	111	yes	chr10	90750963	90751183	110	yes						3.58796	3.58604e-11	17.7062	9.43863e-114	1.3792	0.265279	N	Y
	ADCY7	HCT116			adenylate cyclase 7	NM_001286057			HCT116			chr16	50299255	50299477	1086	no											1.58129	0.0109102	0.744864	0.315395	0.851858	0.618192	N	N
	ADRB2			SJSA	adrenoceptor beta 2			NM_000024	HCT116	MCF7	SJSA											chr5	148205669	148205879	383	yes	1.73358	NA			2.95097	5.38337e-06	N	Y
	AEN		MCF7	SJSA	apoptosis enhancing nuclease		NM_022767	NM_022767	HCT116	MCF7	SJSA						chr15	89164420	89164640	110	yes	chr15	89164440	89164650	105	yes	1.25855	0.226291	2.23479	9.12916e-15	5.48524	5.07395e-14	N	Y
	AK3		MCF7		adenylate kinase 3		NM_001199853		HCT116	MCF7	SJSA						chr9	4743281	4743501	1592	yes						1.1328	0.565989	1.43044	0.00598916	1.60209	0.0773259	N	Y
	AKAP13			SJSA	A-kinase anchoring protein 13			NM_001270546	HCT116		SJSA											chr15	86160520	86160730	2557	yes	1.35509	0.147381	1.33793	0.0584578	1.75798	0.0257944	N	N
	ALDH1A3	HCT116	MCF7		aldehyde dehydrogenase 1 family member A3	NM_000693	NM_000693		HCT116	MCF7	SJSA	chr15	101417750	101417972	2149	yes	chr15	101417741	101417961	2159	yes						1.97668	6.49039e-06	3.23775	1.32497e-23	0.969015	0.932119	N	N
	ANKRD65		MCF7		ankyrin repeat domain 65		NM_001145210			MCF7	SJSA						chr1	1356759	1356979	110	yes								5.56838	5.91677e-08			N	N
	APOBEC3D	HCT116			apolipoprotein B mRNA editing enzyme, catalytic polypeptide-like 3D	NM_152426																					2.12472	0.0493497			1.51772	0.218025	N	Y
	ARHGAP42		MCF7		Rho GTPase activating protein 42		NM_152432		HCT116	MCF7	SJSA						chr11	100560644	100560864	2347	yes						1.20069	0.568238	2.23162	0.00540913	1.32891	0.475806	N	N
	ARPC2		MCF7		actin related protein 2/3 complex subunit 2		NM_152862			MCF7							chr2	219083773	219083993	2066	yes						1.11756	0.595485	1.77448	5.58052e-09	1.41721	0.180259	N	N
	ASTN2	HCT116	MCF7		astrotactin 2	NM_001184734	NM_001184735		HCT116	MCF7	SJSA	chr9	119449391	119449613	111	yes	chr9	119449400	119449620	110	yes						4.30702	1.59215e-19	3.34559	3.06796e-18	1.72076	0.0955828	N	Y
	AXL		MCF7		AXL receptor tyrosine kinase		NM_021913		HCT116	MCF7	SJSA						chr19	41724498	41724718	497	no						1.03059	0.908186	12.3144	1.13665e-19	1.3199	0.299066	N	Y
	C17orf82		MCF7	SJSA	chromosome 17 open reading frame 82		NM_203425	NM_203425	HCT116	MCF7	SJSA						chr17	59489551	59489771	549	no	chr17	59489553	59489763	546	no			7.81398	2.02874e-38	17.9916	2.43509e-14	N	Y
	C17orf89	HCT116		SJSA	chromosome 17 open reading frame 89	NM_001086521		NM_001086521	HCT116	MCF7	SJSA	chr17	79213551	79213773	551	yes						chr17	79213551	79213761	545	yes	2.11657	8.70588e-06	1.33732	0.0858168	2.4118	0.000891654	N	N
	C19orf70			SJSA	chromosome 19 open reading frame 70			NM_205767	HCT116	MCF7	SJSA											chr19	5682941	5683151	2135	yes	1.02962	0.913086	0.893605	0.4623	1.76955	0.0249656	N	N
	C1orf68			SJSA	chromosome 1 open reading frame 68			NM_001024679			SJSA											chr1	152690794	152691004	1100	yes					12.2503	1.70005e-06	N	N
	CALR		MCF7		calreticulin		NM_004343		HCT116	MCF7							chr19	13051250	13051470	1946	yes						0.713438	0.108208	1.26546	0.0340397	2.96917	2.73354e-06	N	N
	CAMK2G		MCF7		calcium/calmodulin-dependent protein kinase II gamma		NM_172171		HCT116	MCF7							chr10	75635883	75636103	1644	no						0.903829	0.660563	1.45994	0.0085793	0.913217	0.778768	N	N
	CASK		MCF7		calcium/calmodulin-dependent serine protein kinase (MAGUK family)		NM_003688			MCF7							chrX	41780782	41781002	1396	no						0.958419	0.882966	1.69355	1.92989e-06	0.810122	0.530998	N	N
	CATSPERG		MCF7		catsper channel auxiliary subunit gamma		NM_021185																				1.89541	NA	2.52579	0.000457145			N	N
	CCDC90B	HCT116	MCF7		coiled-coil domain containing 90B	NM_001286118	NM_001286118																				2.95233	8.36776e-11	3.13621	5.21587e-19	1.6819	0.0684199	N	Y
	CDC42BPG		MCF7	SJSA	CDC42 binding protein kinase gamma (DMPK-like)		NM_017525	NM_017525	HCT116	MCF7	SJSA						chr11	64610525	64610745	1407	yes	chr11	64610542	64610752	1395	yes	1.33094	0.173812	1.83409	1.92864e-07	26.509	6.15855e-17	N	Y
	CELP		MCF7		carboxyl ester lipase pseudogene		NR_001275		HCT116	MCF7	SJSA						chr9	135957184	135957404	633	no								6.41399	1.11219e-07			N	N
	CEP85L	HCT116		SJSA	centrosomal protein 85kDa-like	NM_001042475		NM_206921	HCT116	MCF7	SJSA	chr6	118970303	118970525	2607	yes						chr6	118970324	118970534	2592	yes	2.36753	0.000464815	1.2898	0.501641	3.44134	6.24403e-06	N	Y
	CGB7		MCF7		chorionic gonadotropin, beta polypeptide 7		NM_033142			MCF7							chr19	49559296	49559516	409	yes						1.05976	NA	4.21778	6.43687e-05			N	Y
	CLCA2		MCF7		chloride channel accessory 2		NM_006536			MCF7							chr1	86889661	86889881	110	yes								22.5806	1.53554e-54	19.5045	3.01003e-11	N	Y
	CLP1			SJSA	cleavage and polyadenylation factor I subunit 1			NM_001142597			SJSA											chr11	57424720	57424930	392	yes	0.999182	0.998026	1.12009	0.630734	2.75092	7.67294e-05	N	N
	CMTM3		MCF7		CKLF-like MARVEL transmembrane domain containing 3		NR_037613			MCF7							chr16	66640413	66640633	1956	no						1.15954	0.543818	2.31506	1.26302e-08	0.565944	0.0601904	N	Y
	CNOT6	HCT116	MCF7		CCR4-NOT transcription complex subunit 6	NM_015455	NM_015455		HCT116	MCF7	SJSA	chr5	179923085	179923307	1779	yes	chr5	179923082	179923302	1775	yes						1.45666	0.0324426	1.39723	0.00690702	1.31207	0.343757	N	N
	COBLL1		MCF7		cordon-bleu WH2 repeat protein like 1		NM_001278458			MCF7	SJSA						chr2	165696477	165696697	2092	yes						1.15659	0.654851	1.75028	0.000165006	1.7224	0.0728752	N	Y
	COL17A1	HCT116	MCF7		collagen, type XVII, alpha 1	NM_000494	NM_000494		HCT116	MCF7		chr10	105845546	105845768	111	no	chr10	105845590	105845810	110	no						4.60758	8.04726e-07	11.7938	1.50276e-17			N	Y
	CPEB2		MCF7	SJSA	cytoplasmic polyadenylation element binding protein 2		NM_182485	NM_182485	HCT116	MCF7	SJSA						chr4	15002831	15003051	1358	yes	chr4	15002829	15003039	1365	yes	1.56941	0.305924	1.68563	0.0473152	4.18137	0.00216226	N	Y
	CPSF4			SJSA	cleavage and polyadenylation specific factor 4			NM_001081559		MCF7	SJSA											chr7	99038008	99038218	1550	yes	1.04625	0.857514	1.14355	0.367992	4.93841	5.19736e-12	N	Y
	CROT		MCF7		carnitine O-octanoyltransferase		NM_001243745			MCF7	SJSA						chr7	86973871	86974091	971	yes								1.56448	0.0172364	0.729792	0.364385	N	N
	CSF1		MCF7	SJSA	colony stimulating factor 1 (macrophage)		NM_000757	NM_000757	HCT116	MCF7	SJSA						chr1	110454088	110454308	965	yes	chr1	110454094	110454304	966	yes	1.49852	0.137735	4.06942	3.5712e-09	2.08594	0.00274112	N	Y
	CUEDC1	HCT116	MCF7		CUE domain containing 1	NR_073495	NR_073495		HCT116	MCF7		chr17	55978856	55979078	1784	yes	chr17	55978861	55979081	1780	yes						1.58001	0.0112465	2.00588	3.63574e-11	1.19467	0.557524	N	N
	DAO			SJSA	D-amino-acid oxidase			NM_001917	HCT116		SJSA											chr12	109276043	109276253	2291	yes					35.5167	7.84264e-15	N	Y
	DHRS3		MCF7	SJSA	dehydrogenase/reductase (SDR family) member 3		NM_004753	NM_004753	HCT116	MCF7	SJSA						chr1	12678377	12678597	750	yes	chr1	12678377	12678587	745	yes	1.1191	0.650207	1.59069	0.000158069	5.13587	4.02661e-11	N	Y
	DMTN	HCT116	MCF7		dematin actin binding protein	NM_001114137	NM_001114136		HCT116	MCF7		chr8	21909641	21909863	1330	yes	chr8	21909617	21909837	1355	yes						1.49347	0.048789	1.78192	2.02136e-05	1.04276	0.948742	N	N
	DQX1		MCF7		DEAQ box RNA-dependent ATPase 1		NM_133637			MCF7							chr2	74753417	74753637	119	yes								13.8719	4.44054e-17			N	N
	DSCAML1		MCF7		Down syndrome cell adhesion molecule like 1		NM_020693			MCF7							chr11	117666806	117667026	1061	yes								3.38598	2.63935e-05	2.11997	0.188187	N	N
	DTX4			SJSA	deltex 4, E3 ubiquitin ligase			NM_015177	HCT116		SJSA											chr11	58937256	58937466	2452	yes	1.4151	0.123261	1.19213	0.357675	3.31341	1.99721e-07	N	N
	DYRK3			SJSA	dual specificity tyrosine-(Y)-phosphorylation regulated kinase 3			NM_001004023			SJSA											chr1	206807139	206807349	1638	yes	0.92508	0.83913	0.837407	0.605902	2.98382	2.3872e-05	N	Y
	E2F7			SJSA	E2F transcription factor 7			NM_203394	HCT116	MCF7	SJSA											chr12	77459742	77459952	487	yes	1.1842	0.469935	0.932464	0.815712	1.82722	0.0182079	N	Y
	EDA2R		MCF7	SJSA	ectodysplasin A2 receptor		NM_001242310	NM_001199687	HCT116	MCF7	SJSA						chrX	65858457	65858677	574		chrX	65858452	65858662	584	yes			5.56702	1.6239e-28	6.37844	2.49058e-16	N	Y
	EDN2		MCF7	SJSA	endothelin 2		NM_001956	NM_001956	HCT116	MCF7	SJSA						chr1	41948011	41948231	2224	yes	chr1	41947985	41948195	2255	yes			1.7178	0.00930121	6.49515	4.27629e-16	N	Y
	EFCAB10	HCT116	MCF7		EF-hand calcium binding domain 10	NR_027068	NR_027068		HCT116	MCF7		chr7	105221961	105222183	111	no	chr7	105221950	105222170	110	no						3.48792	9.87287e-06	9.78771	2.09793e-17			N	N
	EML2		MCF7		echinoderm microtubule associated protein like 2		NM_001193269																				1.22462	0.304625	1.81504	2.47121e-05	1.14488	0.670075	N	N
	ENTHD2			SJSA	ENTH domain containing 2			NM_144679	HCT116	MCF7	SJSA											chr17	79213551	79213761	765	yes	0.915881	0.758088	1.025	0.931269	1.79881	0.0252998	N	N
	FAM198B	HCT116	MCF7		family with sequence similarity 198 member B	NM_001128424	NM_016613		HCT116	MCF7		chr4	159092397	159092619	1695	yes	chr4	159092400	159092620	1693	yes						2.79895	0.000457559	2.14501	0.000562021			N	Y
	FAM212B-AS1		MCF7		FAM212B antisense RNA 1		NR_038952			MCF7							chr1	112281117	112281337	1237	no						1.4996	NA	9.73112	4.29915e-22	3.12459	0.00765801	N	N
	FAM87A			SJSA	family with sequence similarity 87 member A			NR_103537		MCF7	SJSA											chr8	333002	333212	105	no					17.6129	5.0927e-10	N	N
	FAM98C		MCF7		family with sequence similarity 98 member C		NM_174905		HCT116	MCF7							chr19	38894337	38894557	672	yes						1.46026	0.0620604	1.50198	0.00279881	1.18355	0.609474	N	Y
	FBXW7			SJSA	F-box and WD repeat domain containing 7			NM_018315	HCT116	MCF7	SJSA											chr4	153273669	153273879	337	yes	1.25209	0.284595	1.12328	0.590557	4.19767	3.54318e-09	N	Y
	FLJ16779		MCF7		Uncharacterized LOC100192386		NR_024389		HCT116	MCF7	SJSA						chr20	61887437	61887657	2217	yes								8.72361	1.70845e-12			N	N
	FLJ26850		MCF7				NR_027257		HCT116	MCF7	SJSA						chr19	50554802	50555022	975	yes								7.68548	2.91158e-12			N	N
	FOLR4		MCF7	SJSA	IZUMO1R, IZUMO1 Receptor, JUNO		NM_001199206	NM_001199206	HCT116	MCF7	SJSA						chr11	94038452	94038672	242	yes	chr11	94038459	94038669	240	yes			4.43027	3.92992e-05	10.3058	1.20193e-05	N	N
	FOSL1		MCF7	SJSA	FOS-like antigen 1		NM_005438	NM_005438	HCT116	MCF7	SJSA						chr11	65666606	65666826	1282	yes	chr11	65666618	65666828	1275	yes	0.868705	0.528873	4.60358	4.90474e-40	2.6063	0.000191363	N	Y
	FTH1P3			SJSA	ferritin, heavy polypeptide 1 pseudogene 3			NR_002201	HCT116	MCF7	SJSA											chr2	27618324	27618534	1986	yes	1.70545	0.169132	1.09878	0.841035	2.37154	0.018417	N	N
	GATC	HCT116			glutamyl-tRNA(Gln) amidotransferase, subunit C	NR_033684			HCT116	MCF7	SJSA	chr12	120884027	120884249	111	yes											1.62314	0.00428181	1.42061	0.00703483	1.29212	0.432468	N	N
	GBE1		MCF7		glucan (1,4-alpha-), branching enzyme 1		NM_000158		HCT116	MCF7	SJSA						chr3	81810675	81810895	166	yes						1.14921	0.582068	2.74802	6.54387e-08	0.801765	0.509729	N	Y
	GIT1			SJSA	G protein-coupled receptor kinase interacting ArfGAP 1			NM_014030	HCT116	MCF7	SJSA											chr17	27914149	27914359	2357	yes	0.857033	0.442116	1.08804	0.686286	2.77954	2.4224e-05	N	Y
	GJB5	HCT116			gap junction protein beta 5	NM_005268			HCT116			chr1	35220862	35221084	325	no											4.01598	1.55268e-18	3.18441	6.08156e-11			N	Y
	GM2A		MCF7		GM2 ganglioside activator		NM_000405			MCF7							chr5	150634159	150634379	1656	no						1.11027	0.640896	3.3046	2.37147e-30	1.17643	0.594279	N	N
	GNA13		MCF7		guanine nucleotide binding protein (G protein), alpha 13		NM_006572		HCT116	MCF7	SJSA						chr17	63054818	63055038	2008	yes						0.919677	0.730336	1.42644	0.0029407	0.953652	0.888628	N	N
	GPC1		MCF7	SJSA	glypican 1		NM_002081	NM_002081	HCT116	MCF7	SJSA						chr2	241373419	241373639	1587	no	chr2	241373426	241373636	1585	no	1.02872	0.914154	2.10799	1.41179e-11	3.66642	2.90032e-09	N	Y
	GPD1L		MCF7		glycerol-3-phosphate dehydrogenase 1-like		NM_015141		HCT116	MCF7							chr3	32147828	32148048	110	yes						1.42855	0.0732312	1.6214	2.57059e-05	0.706302	0.260842	N	Y
	GPR132			SJSA	G protein-coupled receptor 132			NM_001278696			SJSA											chr14	105530722	105530932	1061	no					10.8457	2.85696e-06	N	N
	GPX1	HCT116		SJSA	glutathione peroxidase 1	NM_000581		NM_000581	HCT116		SJSA	chr3	49395863	49396085	183	yes						chr3	49395895	49396105	209	yes	2.8133	1.79269e-10			2.07763	0.00407481	N	Y
	HIST1H2BJ			SJSA	histone cluster 1, H2bj			NM_021058	HCT116		SJSA											chr6	27099675	27099885	796	no			1.54092	0.147611	6.44399	4.26525e-07	N	N
	HSPA4L		MCF7	SJSA	heat shock protein family A (Hsp70) member 4 like		NM_014278	NM_014278	HCT116	MCF7	SJSA						chr4	128704566	128704786	1223	yes	chr4	128704565	128704775	1217	yes	1.49506	0.0750224	2.72632	9.66626e-08	2.75279	0.00165555	N	Y
	ICAM4			SJSA	intercellular adhesion molecule 4 (Landsteiner-Wiener blood group)			NM_022377	HCT116	MCF7	SJSA											chr19	10396732	10396942	807	yes					6.31997	6.76006e-09	N	Y
	IER3		MCF7	SJSA	immediate early response 3		NM_003897	NM_003897	HCT116	MCF7	SJSA						chr6	30712436	30712656	219	yes	chr6	30712447	30712657	225	yes	1.28381	0.178151	1.67465	9.52729e-07	2.69729	8.02618e-05	N	Y
	IGFBP7			SJSA	insulin like growth factor binding protein 7			NM_001253835	HCT116	MCF7	SJSA											chr4	57978108	57978318	1662	yes					1.74293	0.0213956	N	Y
	IP6K3			SJSA	inositol hexakisphosphate kinase 3			NM_001142883		MCF7	SJSA											chr6	33712368	33712578	2290	no					9.56522	2.0691e-23	N	Y
	ISG20			SJSA	interferon stimulated exonuclease gene 20kDa			NM_002201																			1.00119	0.997638	1.17281	0.442546	6.90336	2.25805e-15	N	N
	ISPD	HCT116	MCF7		isoprenoid synthase domain containing	NM_001101417	NM_001101417		HCT116	MCF7	SJSA	chr7	16461472	16461694	636	no	chr7	16461478	16461698	641	no						2.19	0.0265953	2.64921	0.00133199	1.10007	0.838563	N	N
	ITFG1		MCF7		integrin alpha FG-GAP repeat containing 1		NM_030790			MCF7	SJSA						chr16	47493299	47493519	1607	yes						1.21241	0.346291	1.3999	0.0232024	1.16933	0.628315	N	N
	KCNJ12	HCT116			potassium channel, inwardly rectifying subfamily J, member 12	NM_021012			HCT116			chr17	21279188	21279410	401	yes											1.86788	0.00134594			1.25144	0.740192	N	Y
	KCNN4	HCT116	MCF7		potassium channel, calcium activated intermediate/small conductance subfamily N alpha, member 4	NM_002250	NM_002250		HCT116	MCF7	SJSA	chr19	44286982	44287204	1684	yes	chr19	44287001	44287221	1702	yes						1.67722	0.00178191	2.64312	1.49411e-17	1.68374	0.042401	N	Y
	KCTD11	HCT116	MCF7		potassium channel tetramerization domain containing 11	NM_001002914	NM_001002914		HCT116	MCF7		chr17	7257647	7257869	2550	yes	chr17	7257643	7257863	2545	yes						1.7262	0.00563489	2.04988	1.094e-10	2.47052	0.000265307	N	N
	KIAA1683		MCF7		KIAA1683		NM_001145305																				1.19312	0.718461	2.17622	0.0106207			N	N
	KLRG2		MCF7		killer cell lectin-like receptor subfamily G, member 2		NM_198508			MCF7							chr7	139169496	139169716	1149	yes								3.21999	1.03856e-15			N	N
	KRT15	HCT116			keratin 15, type I	NM_002275			HCT116			chr17	39675839	39676061	680	no											2.51434	1.47627e-07	2.7251	3.2465e-18	0.960592	0.934233	N	Y
	LAMA3	HCT116			laminin subunit alpha 3	NM_000227																					3.09041	6.44233e-05	1.8644	0.0189924	1.05285	0.924244	N	Y
	LCE1B		MCF7		late cornified envelope 1B		NM_178349		HCT116	MCF7							chr1	152783635	152783855	703	yes						3.8289	NA	46.5097	1.36581e-44	17.216	5.40942e-09	N	Y
	LCE1E		MCF7	SJSA	late cornified envelope 1E		NM_178353	NM_178353	HCT116	MCF7	SJSA						chr1	152758571	152758791	110	yes	chr1	152758547	152758757	105	yes	2.75285	NA	13.8037	5.96353e-21	7.44602	0.000223553	N	N
	LCN15		MCF7		lipocalin 15		NM_203347		HCT116	MCF7	SJSA						chr9	139659147	139659367	292	no								8.79395	9.08346e-11			N	N
	LDB1		MCF7		LIM domain binding 1		NM_003893			MCF7							chr10	103872961	103873181	1653	no						1.19601	0.368124	1.32998	0.023496	2.12886	0.00189126	N	Y
	LINC00086		MCF7		SMIM10L2A, Small Integral Membrane Protein 10 Like 2A		NR_024359			MCF7							chrX	134557541	134557761	1783	no						4.24953	1.67011e-05	3.20702	0.00177525			N	N
	LINC00475		MCF7		long intergenic non-protein coding RNA 475		NR_027341																						2.36387	0.0300627			N	N
	LINC00482	HCT116	MCF7		long intergenic non-protein coding RNA 482	NR_038080	NR_038080		HCT116	MCF7	SJSA	chr17	79280359	79280581	2579	yes	chr17	79280338	79280558	2601	yes						1.8583	0.019925	2.1536	0.0377967			N	N
	LINC00663	HCT116		SJSA	Long Intergenic Non-Protein Coding RNA 663	NR_026956		NR_026956	HCT116	MCF7	SJSA	chr19	19887370	19887592	259	yes						chr19	19887375	19887585	258	yes	2.72684	0.00363636	1.50193	0.286269	6.79694	1.37879e-05	N	Y
	LINC01021		MCF7		long intergenic non-protein coding RNA 1021		NR_038848		HCT116	MCF7	SJSA						chr5	27472161	27472381	129	yes								3.68926	0.000387033			N	Y
	LOC100996351			SJSA	Uncharacterized LOC100996351			NR_110670			SJSA											chr19	3155085	3155295	105	no					10.674	1.01225e-06	N	N
	LOC101927501	HCT116	MCF7		Uncharacterized LOC101927501	NR_110387	NR_110387		HCT116	MCF7	SJSA	chrX	43036014	43036236	119	yes	chrX	43035996	43036216	138	yes						4.07581	0.000160417	2.8985	0.00366163			N	N
	LOC101928100	HCT116			Uncharacterized LOC101928100	NR_120430																					3.55434	7.81472e-09			1.45098	0.499155	N	N
	LOC101928837		MCF7	SJSA	Uncharacterized LOC101928837		NR_120561	NR_120561	HCT116	MCF7	SJSA						chr11	76495646	76495866	1650	yes	chr11	76495653	76495863	1652	yes			2.38612	0.0183416	4.47181	0.00443087	N	N
	LOC286059			SJSA	Tumor Necrosis Factor Receptor Superfamily, Member 10d, Decoy With Truncated Death Domain Pseudogene			NR_038873	HCT116	MCF7	SJSA											chr8	22926047	22926257	410	yes	1.95143	0.105305			4.62645	7.73423e-06	N	N
	LPXN	HCT116			leupaxin	NM_001143995																					2.23915	0.0136463	1.80698	0.0944676	1.75249	0.0694012	N	Y
	LRPAP1			SJSA	LDL receptor related protein associated protein 1			NM_002337			SJSA											chr4	3533376	3533586	744	yes	0.746058	0.119872	1.20957	0.133538	2.02221	0.00286948	N	N
	LYPD6B		MCF7		LY6/PLAUR domain containing 6B		NM_177964			MCF7							chr2	149897063	149897283	2192	no						1.10479	0.797285	1.45004	0.00619318	0.532589	0.0233209	N	N
	MARCH8	HCT116			membrane associated ring-CH-type finger 8	NM_001282866			HCT116			chr10	46030762	46030984	111	no											2.36908	8.20172e-07	1.51308	0.0584578	1.14232	0.761839	N	N
	MARVELD2		MCF7		MARVEL domain containing 2		NM_001038603		HCT116	MCF7							chr5	68712623	68712843	1794	yes						1.44269	0.117315	1.72813	0.000563132			N	N
	MBD6		MCF7		methyl-CpG binding domain protein 6		NM_052897		HCT116	MCF7							chr12	57915997	57916217	553	no						1.17342	0.52066	1.29577	0.0368469	1.19179	0.601101	N	N
	MBNL2		MCF7		muscleblind-like splicing regulator 2		NM_207304			MCF7							chr13	97872738	97872958	1703	yes						1.76257	0.00136534	1.82597	2.85559e-05	1.12921	0.709348	N	N
	MFGE8		MCF7		milk fat globule-EGF factor 8 protein		NM_001114614		HCT116	MCF7							chr15	89456906	89457126	353	yes						0.780327	0.240034	1.84992	2.49617e-07	1.60407	0.0629613	N	N
	MGRN1		MCF7	SJSA	mahogunin ring finger 1, E3 ubiquitin protein ligase		NM_001142289	NM_001142289	HCT116	MCF7	SJSA						chr16	4675930	4676150	1215	yes	chr16	4675923	4676133	1203	yes	1.2814	0.193851	1.49301	0.00128378	2.43401	0.000132757	N	N
	MIR1204		MCF7		microRNA 1204		NR_031609		HCT116	MCF7	SJSA						chr8	128807934	128808154	165	yes						3.50931	1.85079e-05	1.87616	0.0322443			N	Y
	MIR205HG		MCF7		MIR205 host gene		NM_001104548		HCT116	MCF7	SJSA						chr1	209604415	209604635	2357	no								1.85299	0.0075261			N	N
	MTA2		MCF7	SJSA	metastasis associated 1 family member 2		NM_004739	NM_004739	HCT116	MCF7	SJSA						chr11	62367452	62367672	1751	yes	chr11	62367458	62367668	1750	yes	0.9019	0.658318	1.33045	0.027928	2.11219	0.00136057	N	N
	MYH16	HCT116			myosin, heavy chain 16 pseudogene	NR_002147			HCT116			chr7	98871562	98871784	749	yes											2.89589	0.00108	1.03948	0.951716			N	N
	MYO9B		MCF7		myosin IXB		NM_001130065			MCF7							chr19	17188126	17188346	1645	no						0.710327	0.0698939	1.34472	0.0268839	1.9633	0.00476946	N	N
	NEAT1			SJSA	nuclear paraspeckle assembly transcript 1 (non-protein coding)			NR_028272	HCT116	MCF7	SJSA											chr11	65188696	65188906	1469	yes	1.42972	0.131799	1.28204	0.186257	2.68486	5.55284e-05	N	Y
	NHLH2		MCF7	SJSA	nescient helix-loop-helix 2		NM_001111061	NM_001111061	HCT116	MCF7	SJSA						chr1	116381935	116382155	1289	yes	chr1	116381940	116382150	1289	yes			9.37139	3.05733e-11	33.0832	2.56911e-19	N	Y
	NOP14-AS1	HCT116	MCF7		NOP14 antisense RNA 1	NR_015453	NR_015453		HCT116	MCF7		chr4	2939130	2939352	1963	yes	chr4	2939114	2939334	1946	yes						2.53255	2.43492e-07	2.21364	1.48007e-09	1.0167	0.979254	N	N
	NOTCH1		MCF7		notch 1		NM_017617																				1.35409	0.139003	1.42794	0.00833378	6.1046	6.95461e-16	N	Y
	NTPCR	HCT116	MCF7		nucleoside-triphosphatase, cancer-related	NM_032324	NM_032324		HCT116	MCF7	SJSA	chr1	233088706	233088928	2447	yes	chr1	233088715	233088935	2455	yes						3.04585	2.52637e-12	1.75708	1.81147e-06	1.56006	0.0858525	N	Y
	NYNRIN		MCF7		NYN domain and retroviral integrase containing		NM_025081		HCT116	MCF7							chr14	24865577	24865797	2306	yes								5.8233	2.57754e-31	1.20043	0.713118	N	N
	ORAI3	HCT116	MCF7		ORAI calcium release-activated calcium modulator 3	NM_152288	NM_152288		HCT116	MCF7		chr16	30961544	30961766	1250	yes	chr16	30961558	30961778	1263	yes						3.00173	1.60615e-07	2.09075	6.41246e-10	2.43395	0.00153998	N	Y
	PADI4		MCF7		peptidyl arginine deiminase, type IV		NM_012387		HCT116	MCF7	SJSA						chr1	17636288	17636508	1708	yes								8.4062	2.74609e-14			N	Y
	PARD6B		MCF7		par-6 family cell polarity regulator beta		NM_032521		HCT116	MCF7	SJSA						chr20	49346157	49346377	1815	yes						1.04598	0.886534	1.35776	0.00693706	1.3653	0.545773	N	Y
	PCNP	HCT116	MCF7		PEST proteolytic signal containing nuclear protein	NM_020357	NM_020357		HCT116			chr3	101293165	101293387	234	no											1.86026	0.000239768	1.89432	1.60507e-07	1.47897	0.19526	N	N
	PDE4C		MCF7	SJSA	phosphodiesterase 4C		NR_040546	NR_040546	HCT116	MCF7	SJSA						chr19	18335341	18335561	1835	yes	chr19	18335334	18335544	1847	yes	1.57717	NA	7.30036	3.76025e-12	33.0537	1.20239e-18	N	Y
	PGAP1	HCT116			post-GPI attachment to proteins 1	NM_024989																					2.24191	0.00127054	0.924697	0.851845	0.481955	0.0427296	N	Y
	PGPEP1	HCT116	MCF7		pyroglutamyl-peptidase I	NM_017712	NM_017712																				2.21746	1.5333e-06	2.19061	2.54574e-13	0.817763	0.558266	N	Y
	PIDD1		MCF7	SJSA	p53-induced death domain protein 1		NM_145886	NM_145886	HCT116	MCF7	SJSA						chr11	804309	804529	832	yes	chr11	804307	804517	839	yes	1.4024	0.092063	4.45611	3.97187e-37	5.32971	2.31682e-12	N	N
	PLCXD2	HCT116			phosphatidylinositol-specific phospholipase C, X domain containing 2	NM_153268			HCT116			chr3	111395588	111395810	2176	no											3.61751	3.26097e-05					N	Y
	PLXNB2		MCF7	SJSA	plexin B2		NM_012401	NM_012401	HCT116	MCF7	SJSA						chr22	50744319	50744539	1573	yes	chr22	50744336	50744546	1561	yes	1.19017	0.377496	1.65884	5.28743e-07	4.07693	1.10391e-10	N	Y
	PMAIP1	HCT116	MCF7		phorbol-12-myristate-13-acetate-induced protein 1	NM_021127	NM_021127		HCT116	MCF7	SJSA	chr18	57566907	57567129	175	yes	chr18	57566900	57567120	183	yes						1.96724	0.0021997	1.93908	0.000344473	1.83786	0.0649824	N	Y
	POLR3GL	HCT116			polymerase (RNA) III (DNA directed) polypeptide G (32kD)-like	NM_032305			HCT116			chr1	145468988	145469210	1289	no											1.59212	0.0307176	1.03811	0.850203	0.78429	0.434426	N	Y
	PORCN			SJSA	porcupine homolog (Drosophila)			NM_203475			SJSA											chrX	48368363	48368573	1121	yes	2.32142	4.00041e-06	1.17217	0.492234	1.76694	0.0395863	N	N
	POU2F2			SJSA	POU class 2 homeobox 2			NM_001247994	HCT116	MCF7	SJSA											chr19	42634057	42634267	2464	yes	1.1368	0.812846	1.37068	0.498015	9.61664	1.10305e-18	N	N
	PRKAB2	HCT116			protein kinase, AMP-activated, beta 2 non-catalytic subunit	NM_005399			HCT116		SJSA	chr1	146642202	146642424	1856	yes											2.29646	2.51987e-06	1.48924	0.0153686	1.74713	0.0397563	N	Y
	PRKD2		MCF7		protein kinase D2		NM_001079880		HCT116	MCF7							chr19	47219051	47219271	1224	yes						0.783602	0.198426	1.34339	0.0123862	1.40338	0.205369	N	N
	PRKY			SJSA	protein kinase, Y-linked, pseudogene			NR_028062																			1.66303	0.24203	1.3098	0.564214	2.16102	0.0242607	N	N
	PROM2		MCF7		prominin 2		NM_001165977																				3.81136	8.38772e-12	3.47235	1.45442e-34			N	Y
	PSMC4			SJSA	proteasome 26S subunit, ATPase 4			NM_153001		MCF7	SJSA											chr19	40475215	40475425	1593	no	0.82362	0.356168	0.882499	0.369385	1.67301	0.0373756	N	N
	PTK2B			SJSA	protein tyrosine kinase 2 beta			NM_173174	HCT116	MCF7	SJSA											chr8	27169648	27169858	754	yes	1.53591	0.0689357	1.45654	0.268361	2.60069	0.00263702	N	N
	PTRH1	HCT116			peptidyl-tRNA hydrolase 1 homolog	NM_001002913			HCT116		SJSA	chr9	130475564	130475786	2262	yes											1.65402	0.00738577	0.906231	0.609643	1.36603	0.295775	N	N
	RAB1A		MCF7		RAB1A, member RAS oncogene family		NM_015543																				1.2501	0.232707	1.43665	0.00182041	1.60131	0.0615664	N	N
	REV3L	HCT116	MCF7		REV3 like, DNA directed polymerase zeta catalytic subunit	NM_001286432	NM_001286432		HCT116	MCF7	SJSA	chr6	111805219	111805441	412	yes	chr6	111805232	111805452	424	yes						2.03139	3.2467e-05	1.54831	0.00540284	1.47403	0.164084	N	Y
	RHOD	HCT116	MCF7		ras homolog family member D	NM_014578	NM_014578		HCT116	MCF7		chr11	66825156	66825378	978	no	chr11	66825189	66825409	1010	no						1.99152	0.000130719	2.54546	1.22224e-20			N	Y
	RNF224		MCF7		ring finger protein 224		NM_001190228		HCT116	MCF7	SJSA						chr9	140120467	140120687	1442	yes						2.06237	NA	2.05455	0.0148563			N	N
	RPS19			SJSA	ribosomal protein S19			NM_001022	HCT116	MCF7	SJSA											chr19	42364383	42364593	500	yes	1.02941	0.910672	0.815967	0.170853	2.85252	5.43944e-06	N	N
	RRAD			SJSA	Ras-related associated with diabetes			NM_004165	HCT116	MCF7	SJSA											chr16	66961891	66962101	2557	yes	1.02696	0.964112			69.6215	6.63806e-80	N	Y
	RXRA		MCF7		retinoid X receptor alpha		NM_002957		HCT116	MCF7	SJSA						chr9	137271889	137272109	858							1.07754	0.751386	1.45565	0.000319994	2.5174	5.94365e-05	N	N
	S100A2	HCT116	MCF7		S100 calcium binding protein A2	NM_005978	NM_005978		HCT116	MCF7	SJSA	chr1	153540046	153540268	1851	yes	chr1	153540036	153540256	1840	yes						2.35454	3.67997e-07	2.59521	4.02981e-20	1.43194	0.246273	N	Y
	SAC3D1			SJSA	SAC3 domain containing 1			NM_013299	HCT116	MCF7	SJSA											chr11	64808692	64808902	421	yes	0.71448	0.0687325	1.24056	0.124779	2.81379	8.10159e-06	N	Y
	SARS		MCF7		seryl-tRNA synthetase		NR_034072		HCT116	MCF7							chr1	109756959	109757179	554	no						0.943679	0.82671	1.61101	3.2251e-06	1.64773	0.0544907	N	N
	SBF1		MCF7	SJSA	SET binding factor 1		NM_002972	NM_002972	HCT116	MCF7	SJSA						chr22	50915270	50915490	1916	yes	chr22	50915278	50915488	1919	yes	0.993974	0.982196	1.56352	3.9985e-05	2.12595	0.00136454	N	N
	SCN4B			SJSA	sodium channel, voltage gated, type IV beta subunit			NM_174934			SJSA											chr11	118023982	118024192	457	yes					6.39233	3.61984e-06	N	Y
	SCRIB		MCF7		scribbled planar cell polarity protein		NM_182706			MCF7							chr8	144897187	144897407	253	no						0.875234	0.537491	1.80133	1.59779e-08	2.07896	0.00283133	N	N
	SDPR		MCF7	SJSA	serum deprivation response		NM_004657	NM_004657	HCT116	MCF7	SJSA						chr2	192709587	192709807	2310	yes	chr2	192709605	192709815	2297	yes			3.61585	0.000407558	2.6261	0.00110043	N	Y
	SERINC5		MCF7		serine incorporator 5		NM_178276			MCF7							chr5	79550934	79551154	855	yes						1.45266	0.071395	2.0403	1.68155e-09	1.66507	0.0815063	N	Y
	SERPINB5	HCT116	MCF7		serpin peptidase inhibitor, clade B (ovalbumin), member 5	NM_002639	NM_002639		HCT116	MCF7		chr18	61143891	61144113	143	yes	chr18	61143886	61144106	149	yes						4.59095	2.47759e-15	4.8215	3.46372e-24			N	Y
	SFN	HCT116	MCF7		stratifin	NM_006142	NM_006142		HCT116	MCF7	SJSA	chr1	27187714	27187936	1809	yes	chr1	27187710	27187930	1814	yes						1.9827	7.58974e-06	2.83078	2.90539e-25	2.64924	0.00535785	N	Y
	SGK223			SJSA	PRAGMIN, Sugen Kinase 223, Homolog Of Rat Pragma Of Rnd2			NM_001080826																			1.09061	0.738936	1.94923	4.81579e-07	4.76253	2.65525e-10	N	N
	SHANK2		MCF7		SH3 and multiple ankyrin repeat domains 2		NM_012309																				1.82923	0.0335799	1.95906	9.38481e-06	1.79712	0.0510784	N	N
	SLC12A4		MCF7	SJSA	solute carrier family 12 (potassium/chloride transporter), member 4		NM_005072	NM_005072	HCT116	MCF7	SJSA						chr16	68000164	68000384	2324	yes	chr16	68000165	68000375	2328	yes	1.09629	0.707521	8.02298	1.23889e-27	2.15704	0.00113155	N	Y
	SLC25A45			SJSA	solute carrier family 25 member 45			NM_001278251			SJSA											chr11	65149684	65149894	105	yes	1.69303	0.203821	1.30734	0.42861	3.2202	5.35923e-05	N	Y
	SLC30A1		MCF7	SJSA	solute carrier family 30 (zinc transporter), member 1		NM_021194	NM_021194	HCT116	MCF7	SJSA						chr1	211750616	211750836	1374	yes	chr1	211750619	211750829	1376	yes	1.99981	0.00331972	1.67228	0.0193676	3.51825	4.45085e-06	N	Y
	SMAD3		MCF7		SMAD family member 3		NM_001145104																				1.07841	0.751378	2.16491	9.50114e-14	1.883	0.00873083	N	N
	SNCG	HCT116			synuclein gamma	NM_003087			HCT116			chr10	88718684	88718906	507	no											1.72702	0.0073071	1.75295	3.00319e-05	1.29953	0.710008	N	N
	SPATA18		MCF7	SJSA	spermatogenesis associated 18		NM_145263	NM_145263	HCT116	MCF7	SJSA						chr4	52918020	52918240	537	yes	chr4	52918017	52918227	529	yes			6.22003	4.87015e-41	17.3111	4.96043e-24	N	Y
	SRA1	HCT116			steroid receptor RNA activator 1	NR_045586			HCT116	MCF7		chr5	139937011	139937233	557	no											1.51858	0.0164593	1.2428	0.0787171	2.17716	0.00234683	N	N
	SRSF8	HCT116			serine/arginine-rich splicing factor 8	NR_103726			HCT116	MCF7	SJSA	chr11	94798603	94798825	1328	yes											1.72218	0.00113704	1.10764	0.557278	1.23041	0.519782	N	Y
	STOM		MCF7	SJSA	stomatin		NM_001270527	NM_001270527																			1.24762	0.271211	2.16471	2.25714e-09	1.63257	0.0463874	N	N
	STX17	HCT116			syntaxin 17	NM_017919			HCT116	MCF7	SJSA	chr9	102667378	102667600	1427	no											1.61589	0.0112907	1.07718	0.713416	0.72303	0.28502	N	N
	SYTL1	HCT116	MCF7		synaptotagmin like 1	NM_032872	NM_032872		HCT116	MCF7		chr1	27669459	27669681	1087	yes	chr1	27669467	27669687	1094	yes						4.14515	1.01441e-15	3.38754	1.34217e-30	0.50641	0.184346	N	Y
	TCAIM	HCT116			T-cell activation inhibitor, mitochondrial	NM_001029840																					2.11304	2.60785e-05	1.46048	0.0279257	1.27298	0.475868	N	N
	TCP11L1	HCT116			t-complex 11, testis-specific-like 1	NM_018393																					1.93332	0.00300262	1.94614	1.28083e-05	1.94157	0.0117254	N	Y
	TEKT4P2		MCF7		tektin 4 pseudogene 2		NR_038328		HCT116	MCF7							chr21	9970241	9970461	1757	no						1.42035	0.145016	1.33813	0.0324443	1.09587	0.803936	N	N
	TIMM21			SJSA	translocase of inner mitochondrial membrane 21 homolog (yeast)			NM_014177	HCT116	MCF7	SJSA											chr18	71817200	71817410	1559	yes	1.04459	0.871035	0.676843	0.0122365	1.84507	0.015103	N	N
	TLR3	HCT116		SJSA	toll-like receptor 3	NM_003265		NM_003265	HCT116	MCF7	SJSA	chr4	186988276	186988498	1923	yes						chr4	186988289	186988499	1916	yes	3.63319	1.54253e-06			2.39644	0.0214955	N	Y
	TM7SF3	HCT116	MCF7		transmembrane 7 superfamily member 3	NM_016551	NM_016551		HCT116	MCF7	SJSA	chr12	27165893	27166115	1336	yes	chr12	27165884	27166104	1346	yes						2.22453	2.72526e-07	3.35911	6.04559e-33	1.04941	0.889757	N	Y
	TMEM253		MCF7		transmembrane protein 253		NM_001146683		HCT116	MCF7	SJSA						chr14	21566898	21567118	110	no						2.21234	NA	4.84768	8.66628e-07			N	N
	TMEM64	HCT116			transmembrane protein 64	NM_001146273			HCT116		SJSA	chr8	91657007	91657229	1016	yes											1.80416	0.000779749	1.21639	0.172164	0.928481	0.855489	N	N
	TMPRSS4		MCF7		transmembrane protease, serine 4		NM_001173552			MCF7							chr11	117945626	117945846	1992	no								2.01133	3.07185e-10			N	N
	TNFRSF10A		MCF7		tumor necrosis factor receptor superfamily member 10a		NM_003844																				1.31435	0.166443	1.93257	0.000308983	5.67442	9.68823e-05	N	Y
	TNFRSF10C	HCT116	MCF7		tumor necrosis factor receptor superfamily member 10c	NM_003841	NM_003841		HCT116	MCF7		chr8	22960703	22960925	487	yes	chr8	22960691	22960911	474	yes						5.61358	6.01016e-13	7.58169	8.93417e-38			N	Y
	TNFRSF10D	HCT116		SJSA	tumor necrosis factor receptor superfamily member 10d	NM_003840		NM_003840	HCT116		SJSA	chr8	23021061	23021283	372	yes						chr8	23021090	23021300	349	yes	1.44897	0.0484092			4.19312	4.0434e-10	N	Y
	TNFSF4			SJSA	tumor necrosis factor superfamily member 4			NM_003326			SJSA											chr1	173175046	173175256	1321	no	2.01843	NA			7.44461	4.09854e-05	N	Y
	TP53TG1		MCF7	SJSA	TP53 target 1 (non-protein coding)		NR_015381	NR_015381		MCF7	SJSA						chr7	86973871	86974091	828	yes	chr7	86973869	86974079	835	yes			3.84831	5.92759e-37	4.30269	7.57965e-08	N	Y
	TRAK1	HCT116			trafficking protein, kinesin binding 1	NM_014965			HCT116			chr3	42201630	42201852	111	no											2.15648	2.79218e-06	2.04974	1.00628e-08	0.928859	0.832766	N	Y
	TRIM22			SJSA	tripartite motif containing 22			NM_006074	HCT116	MCF7	SJSA											chr11	5711684	5711894	972	yes	2.2031	NA			3.78695	1.70175e-07	N	Y
	TRIM26		MCF7	SJSA	tripartite motif containing 26		NM_001242783_1	NM_001242783_1		MCF7	SJSA						chr6	30179755	30179975	1407	yes	chr6	30179757	30179967	1410	yes	0.853843	0.479653	1.3176	0.02781	1.93484	0.00623938	N	N
	TRIM32		MCF7		tripartite motif containing 32		NM_012210		HCT116	MCF7	SJSA						chr9	119449400	119449620	110	yes						1.20304	0.475095	1.6667	0.000810891	1.17329	0.652974	N	N
	TRIM35			SJSA	tripartite motif containing 35			NM_171982	HCT116	MCF7	SJSA											chr8	27169648	27169858	919	yes	1.25097	0.274929	1.42451	0.0763729	2.93814	7.7556e-06	N	Y
	TRIM55		MCF7	SJSA	tripartite motif containing 55		NM_184086	NM_184086	HCT116	MCF7							chr8	67036578	67036798	2591	yes								2.39974	0.0204964	351.175	5.8786e-65	N	N
	TSPAN11			SJSA	tetraspanin 11			NM_001080509			SJSA											chr12	31079954	31080164	221	no					16.8773	1.60832e-25	N	Y
	TSPEAR		MCF7		thrombospondin-type laminin G domain and EAR repeats		NM_001272037		HCT116	MCF7	SJSA						chr21	46129848	46130068	1538	yes								6.82185	2.90748e-08			N	N
	TUBB6		MCF7		tubulin beta 6 class V		NM_032525		HCT116	MCF7	SJSA						chr18	12310004	12310224	1857	yes						0.724576	0.0713527	2.19171	2.00474e-15	1.54323	0.105344	N	N
	TYMSOS		MCF7	SJSA	TYMS opposite strand		NM_001012716	NM_001012716	HCT116	MCF7	SJSA						chr18	658169	658389	110	no	chr18	658157	658367	105	no	1.56604	0.22385	3.45585	5.78107e-19	12.6972	7.06578e-27	N	N
	VPS13D	HCT116			vacuolar protein sorting 13 homolog D (S. cerevisiae)	NM_018156			HCT116	MCF7		chr1	12292399	12292621	2397	no											1.61967	0.0094782	1.21412	0.339142	1.53918	0.122856	N	N
	VWCE		MCF7	SJSA	von Willebrand factor C and EGF domains		NM_152718	NM_152718		MCF7	SJSA						chr11	61065158	61065378	2480	yes	chr11	61065164	61065374	2481	yes	1.65235	NA	3.74891	6.13212e-06	28.2242	1.71133e-22	N	Y
	YBX3	HCT116			Y-box binding protein 3	NM_003651																					1.49121	0.0303539	1.15873	0.313536	2.01561	0.0041213	N	N
	ZBTB7B		MCF7		zinc finger and BTB domain containing 7B		NR_045515		HCT116	MCF7							chr1	154976301	154976521	1305	no						1.281	0.227817	1.33749	0.0172364	2.39114	0.0012038	N	N
	ZDHHC5			SJSA	zinc finger, DHHC-type containing 5			NM_015457			SJSA											chr11	57436963	57437173	1594	no	1.15619	0.470958	1.43881	0.00282607	2.53244	5.56448e-05	N	N
	ZFAND5			SJSA	zinc finger, AN1-type domain 5			NM_001102420																			0.957163	0.860122	1.36549	0.0168072	1.67961	0.0365779	N	N
	ZNF33A		MCF7		zinc finger protein 33A		NM_001278173		HCT116	MCF7	SJSA						chr10	38297024	38297244	2445	yes						1.35145	0.183776	1.52476	0.0118426	0.502945	0.0403417	N	N
	ZNF33B	HCT116	MCF7		zinc finger protein 33B	NM_006955	NM_006955		HCT116	MCF7	SJSA	chr10	43136387	43136609	2506	yes	chr10	43136372	43136592	2490	yes						2.53115	1.75705e-07	1.55206	0.0134093	0.646176	0.179746	N	N
	ZNF423		MCF7	SJSA	zinc finger protein 423		NM_001271620	NM_001271620	HCT116	MCF7	SJSA						chr16	49889593	49889813	2128	no	chr16	49889580	49889790	2146	no	2.52363	NA	2.97014	3.60213e-07	3.80131	4.27817e-07	N	N
	ZNF488		MCF7		zinc finger protein 488		NM_153034																				1.31016	0.323832	6.42333	4.85988e-47	3.29849	1.03153e-05	N	N
	ZNF524		MCF7		zinc finger protein 524		NM_153219		HCT116	MCF7	SJSA						chr19	56112666	56112886	1046	yes						1.27765	0.292702	1.42299	0.0135968	2.37959	0.000883551	N	N
	ZNF674-AS1			SJSA	ZNF674 antisense RNA 1			NR_015378	HCT116		SJSA											chrX	46402437	46402647	2384	yes	0.934756	0.90593	1.0699	0.893721	6.55034	1.07485e-08	N	N
	ZNF707			SJSA	zinc finger protein 707			NM_001288806		MCF7	SJSA											chr8	144767766	144767976	1249	yes	1.30997	0.214148	1.15033	0.442546	2.24484	0.0047001	N	N
