# Supplementary material for: Identification of a core TP53 transcriptional program with highly distributed tumor suppressive activity
Source: HighWire-hosted journal article supplement (doi:10.1101/gr.220533.117), 2017-09-13
Supplement: Supplemental_File_S7.xlsx [file Supplemental_File_S7.xlsx]

## Sheet: TP53 core genes
		TP53 activation by various stimuli										TP53 activation by Nutlin in normal cell lines
		Cell line/type and stimulus
		Cancer cell lines					Normal cells/cell lines					Cell type and stimulus
	TP53 core program genes	U2OS, doxorubicin* [1]	HCT116, 5-FU* [5]	HT1080, etoposide* [7]	HT1080, quercetin* [7]	HT1080, MMS* [7]	hiPSC, doxorubicin** [2]	Human fetal fibroblasts, doxorubicin* [3]	Human foreskin fibroblasts, campthotecin* [4]	Whole blood, irradiation* [6]		Foreskin fibroblasts (BJ), Nutlin [8]**	Retinal epithelial cells (RPE1), Nutlin [9]**	Primary lung fibroblasts (IMR90), Nutlin [10]**
	% of core genes induced	0.330097	0.368932	0.669903	0.524272	0.475728	0.796117	0.184466	0.15534	0.23301		0.854369	0.553398	0.728155
	ABCA12	+	+				+					+	+	+
	ACER2		+				+			+		+	+	+
	ADIRF						+
	AMZ2			+	+	+						+
	AMZ2P1											+		+
	ANKRA2	+	+	+	+	+	+	+	+	+		+		+
	ANXA4	+	+	+			+					+	+
	APOBEC3C	+	+	+	+	+	+			+		+	+	+
	APOBEC3H						+					+	+	+
	ASCC3	+	+	+	+	+	+			+		+	+	+
	ATF3			+	+	+	+			+		+		+
	BAX						+			+		+	+
	BBC3			+			+	+	+	+		+	+	+
	BLCAP	+		+			+					+
	BLOC1S2	+		+		+	+	+	+	+		+	+	+
	BTG2			+	+	+	+		+			+	+	+
	C12orf5			+	+	+	+	+	+	+		+	+	+
	C19orf82						+					+		+
	C9orf169			+			+					+	+	+
	CCNG1		+	+	+		+		+	+		+	+	+
	CD82		+	+	+		+					+	+
	CDC42SE1
	CDIP1						+					+
	CDKN1A		+	+	+	+	+	+				+	+	+
	CEL						+					+
	CMBL	+	+	+	+	+	+					+	+	+
	CSNK1G1		+	+	+		+
	CYFIP2	+	+	+	+	+	+					+	+	+
	DCP1B			+		+	+			+		+
	DDB2			+		+	+	+				+		+
	DDIT4											+	+	+
	DGKA	+		+		+	+					+	+	+
	DRAM1	+		+	+		+	+		+		+	+	+
	DUSP14	+	+	+	+	+	+
	EFNB1						+			+		+		+
	EI24			+	+	+	+		+	+		+
	EPS8L2			+		+	+					+	+	+
	ETV7											+	+	+
	FAM210B						+		+			+	+	+
	FAM212B						+					+	+	+
	FAS			+	+	+	+			+		+	+	+
	FBXO22	+		+	+	+	+	+		+		+	+	+
	FDXR				+	+						+	+	+
	FHL2	+		+	+	+						+	+	+
	GADD45A			+	+	+	+	+				+		+
	GATS			+	+		+					+	+
	GDF15			+	+	+			+			+	+	+
	GPR87	+					+							+
	GRIN2C			+	+	+						+	+	+
	HES2		+	+
	IKBIP			+	+		+	+
	INPP1	+	+	+	+	+	+
	ISCU	+		+	+	+	+	+	+			+	+	+
	KANK3						+					+	+	+
	KIAA0247	+		+	+		+	+				+	+	+
	KLHDC7A
	KLHL30
	LIF						+					+
	LRP1			+								+	+
	MDM2			+	+	+	+	+				+	+	+
	NADSYN1	+	+				+					+	+	+
	NINJ1	+	+	+	+		+					+		+
	NUPR1											+		+
	PANK1	+		+	+		+			+		+		+
	PARD6G	+	+	+	+	+	+			+				+
	PGF	+	+	+	+							+	+	+
	PHLDA3			+	+	+	+					+	+	+
	PHPT1			+			+	+				+	+
	PLK2						+	+						+
	PLK3			+		+			+			+	+	+
	PNPO			+			+					+
	POLH	+		+	+	+	+					+		+
	PPM1D	+			+		+			+		+		+
	PRDM1											+		+
	PRKAB1			+	+	+	+			+
	PRKX		+	+		+	+	+				+		+
	PSTPIP2		+		+	+	+					+	+	+
	PTP4A1	+		+	+	+	+		+	+		+		+
	RAP2B			+			+					+		+
	RNF19B	+	+	+	+	+	+		+			+		+
	RPS27L			+	+		+	+	+			+	+
	RRM2B			+	+	+	+					+	+	+
	SERPINE1		+										+
	SERTAD1	+		+		+	+	+				+		+
	SESN1		+	+	+	+	+					+	+	+
	SESN2		+	+	+	+	+					+	+	+
	SULF2	+	+	+	+		+			+		+	+	+
	TGFA		+	+									+
	TMEM63B						+					+	+
	TMEM68	+				+	+					+		+
	TNFRSF10B		+		+							+	+	+
	TP53I3		+				+		+	+		+	+	+
	TP53INP1		+		+	+	+					+	+	+
	TRAF4		+	+	+	+	+		+			+		+
	TRIAP1		+	+	+	+	+					+	+	+
	TSKU	+	+		+		+					+		+
	WDR63	+	+	+								+	+	+
	XPC		+	+	+	+	+					+	+	+
	ZMAT3	+	+	+	+	+	+					+	+	+
	ZNF337			+		+	+	+		+		+		+
	ZNF385A			+			+					+		+
	ZNF561	+	+	+	+	+	+					+		+
	ZNF79		+	+	+	+	+					+		+
	References
	1	Menendez, D., et al., Diverse stresses dramatically alter genome-wide p53 binding and transactivation landscape in human cancer cells. Nucleic Acids Res, 2013. 41(15): p. 7286-301.
	2	Burridge, P.W., et al., Human induced pluripotent stem cell-derived cardiomyocytes recapitulate the predilection of breast cancer patients to doxorubicin-induced cardiotoxicity. Nat Med. 2016; 22(5): p. 547-56.
	3	Younger, S.T., et al., Integrative genomic analysis reveals widespread enhancer regulation by p53 in response to DNA damage. Nucleic Acids Res, 2015. 43(9): p. 4447-62.
	4	Veloso, A., et al., Genome-wide transcriptional effects of the anti-cancer agent camptothecin. PLoS One, 2013. 8(10): p. e78190.
	5	Wang, B., et al., Mapping the p53 transcriptome universe using p53 natural polymorphs. Cell Death Differ, 2014. 21(4): p. 521-32.
	6	Ghandhi, S.A., et al., Radiation dose-rate effects on gene expression for human biodosimetry. BMC Med Genomics, 2015. 8: p. 22.
	7	Clewell, R.A., et al., Profiling dose-dependent activation of p53-mediated signaling pathways by chemicals with distinct mechanisms of DNA damage. Toxicol Sci, 2014. 142(1): p. 56-73.
	8	Loayza-Puch F., et al., p53 induces transcriptional and translational programs to suppress cell proliferation and growth. Genome Biol 2013; 14(4)
	9	Potapova, T.A., et al., Transcriptome analysis of tetraploid cells identifies cyclin D2 as a facilitator of adaptation to genome doubling in the presence of p53. Mol Biol Cell. 2016. 27(20): p. 3065-3084.
	10	Sammons, M.A., et al., TP53 engagement with the genome occurs in distinct local chromatin environments via pioneer factor activity. Genome Res, 2015; 25(2): p. 179-88.
	* as identified by authors of the study
	** RPKM FC > 1.5
