# Supplementary material for: Identification of a core TP53 transcriptional program with highly distributed tumor suppressive activity
Source: HighWire-hosted journal article supplement (doi:10.1101/gr.220533.117), 2017-09-13
Supplement: Supplemental_File_S8_shRNA_screen_data.xlsx [file Supplemental_File_S8_shRNA_screen_data.xlsx]

## Sheet: TP53TARGET library
	GeneName	DMSO (count)	Nutlin (count)	FC	log2(FC)
	TP53	505.89	10671.4	21.0943	4.39878
	TMEM63B	6.71189	1	0.148989	-2.74672
	RBM38	11.4969	1	0.0869801	-3.52317
	COL17A1	209.907	13.5913	0.0647491	-3.949
	AMZ2	16.4152	1	0.0609191	-4.03696
	CYFIP2	22.8376	1	0.0437875	-4.51334
	APOBEC3D	27.4397	1	0.0364436	-4.77819
	FOSL1	33.4856	1	0.0298636	-5.06547
	ALOX5	33.7399	1	0.0296385	-5.07638
	MFSD4	38.2912	1	0.0261157	-5.25894
	VWCE	42.0582	1	0.0237766	-5.39432
	TP53AIP1	42.3952	1	0.0235876	-5.40583
	HHAT	43.4118	1	0.0230352	-5.44002
	PLEKHG1	44.3439	1	0.022551	-5.47066
	ORAI3	44.4799	1	0.022482	-5.47508
	DAO	44.8497	1	0.0222967	-5.48703
	PHLDA3	46.7387	1	0.0213955	-5.54655
	ZNF219	47.7667	1	0.0209351	-5.57793
	NLRC4	48.2657	1	0.0207186	-5.59293
	SF3B14	51.7228	1.04969	0.0202946	-5.62276
	PLK3	49.5686	1	0.0201741	-5.63136
	MDM2	50.3287	1	0.0198694	-5.65331
	APAF1	50.6218	1	0.0197543	-5.66169
	PRKAB2	51.3527	1	0.0194732	-5.68237
	PDE4C	53.978	1	0.0185261	-5.7543
	C3orf20	53.978	1	0.0185261	-5.7543
	BIRC5	54.3399	1	0.0184027	-5.76394
	MGAM	54.6812	1	0.0182878	-5.77297
	RNF144B	55.1096	1	0.0181456	-5.78423
	ARHGAP30	55.517	1	0.0180125	-5.79486
	ESRRB	56.3952	1	0.017732	-5.8175
	C2orf66	56.3965	1	0.0177316	-5.81753
	RNF19B	57.6633	1	0.017342	-5.84958
	BCL6	58.4364	1	0.0171126	-5.8688
	TGFA	58.6051	1	0.0170634	-5.87295
	CCBP2	58.7822	1	0.017012	-5.87731
	WDR63	59.5644	1	0.0167886	-5.89638
	ITGA9	62.1813	1	0.016082	-5.95841
	SEMA3B	62.6325	1	0.0159662	-5.96884
	PRDM1	63.9484	1	0.0156376	-5.99884
	MGMT	65.4949	1	0.0152684	-6.03331
	TP63	65.5201	1	0.0152625	-6.03386
	ADIG	65.7908	1	0.0151997	-6.03981
	COL20A1	66.2426	1	0.015096	-6.04969
	HSPA8	66.3668	1	0.0150678	-6.05239
	TM7SF3	67.4151	1	0.0148335	-6.075
	NOS3	67.5351	1	0.0148071	-6.07756
	KSR1	67.5955	1	0.0147939	-6.07886
	SGK2	67.6009	1	0.0147927	-6.07897
	ASS1	67.6708	1	0.0147774	-6.08046
	TNFRSF10A	72.7341	1.04969	0.0144319	-6.11459
	TCERG1L	70.3027	1	0.0142242	-6.13551
	BMP7	73.2935	1	0.0136438	-6.19561
	DDB2	73.3486	1	0.0136335	-6.1967
	DRAM1	73.5421	1	0.0135976	-6.2005
	PANK1	73.7235	1	0.0135642	-6.20405
	CSNK1G1	75.2679	1	0.0132859	-6.23396
	C6orf58	75.3008	1	0.0132801	-6.23459
	PNLIPRP2	75.8498	1	0.0131839	-6.24507
	PTEN	76.8155	1	0.0130182	-6.26333
	KCNC2	76.89	1	0.0130056	-6.26472
	ARID3A	78.5747	1	0.0127267	-6.29599
	TOB1	79.0557	1	0.0126493	-6.3048
	HTT	79.5069	1	0.0125775	-6.31301
	VCAN	80.0392	1	0.0124939	-6.32263
	PCBP4	80.1379	1	0.0124785	-6.32441
	CES2	84.5076	1.04969	0.0124213	-6.33104
	LDLRAD1	80.5328	1	0.0124173	-6.3315
	ADAMTS7	85.453	1.04969	0.0122839	-6.34709
	APOBEC3H	83.8383	1	0.0119277	-6.38954
	TP53I3	84.4485	1	0.0118415	-6.4
	PVRL4	84.5143	1	0.0118323	-6.40112
	FBXO22	84.5801	1	0.0118231	-6.40225
	TP53I11	84.975	1	0.0117682	-6.40897
	DUSP5	85.5072	1	0.0116949	-6.41797
	ZNF79	85.7923	1	0.0116561	-6.42278
	PRO1068	87.0869	1	0.0114828	-6.44438
	MCC	89.0391	1	0.011231	-6.47637
	TNFAIP8	89.7792	1	0.0111384	-6.48831
	PLK2	92.8065	1	0.0107751	-6.53615
	TYRP1	105.771	1.13312	0.0107129	-6.54451
	EDN2	93.8548	1	0.0106548	-6.55236
	GRIN2C	99.6729	1.04969	0.0105314	-6.56916
	FDXR	95.1099	1	0.0105141	-6.57152
	DUSP1	95.189	1	0.0105054	-6.57272
	ABCA12	95.5706	1	0.0104635	-6.5785
	SESN2	96.1589	1	0.0103995	-6.58735
	HIC1	96.2287	1	0.0103919	-6.5884
	DCP1B	96.6894	1	0.0103424	-6.59529
	LRDD	96.9356	1	0.0103161	-6.59895
	CAV1	98.5674	1	0.0101453	-6.62304
	MMP2	98.5692	1	0.0101452	-6.62306
	NADSYN1	98.8865	1	0.0101126	-6.6277
	CDC42BPG	98.927	1	0.0101085	-6.62829
	C6orf204	100.704	1	0.0099301	-6.65398
	TNFRSF10D	100.868	1	0.00991391	-6.65633
	ZMAT3	101.019	1	0.00989914	-6.65848
	CRIP2	101.494	1	0.00985284	-6.66525
	SERPINE1	102.196	1	0.0097851	-6.6752
	HSPA4L	104.773	1	0.00954449	-6.71112
	PPM1D	104.903	1	0.00953262	-6.71291
	GPX1	105.644	1	0.00946571	-6.72307
	IKBIP	105.823	1	0.00944971	-6.72551
	FBXW7	106.118	1	0.00942346	-6.72953
	KIAA0247	106.957	1	0.00934956	-6.74089
	TAF3	108.942	1	0.00917917	-6.76742
	PLAGL1	109.588	1	0.00912506	-6.77595
	CPO	110.707	1	0.00903284	-6.7906
	ATF3	111	1	0.00900901	-6.79442
	PRKX	112.221	1	0.008911	-6.8102
	P2RX6	112.287	1	0.00890578	-6.81104
	LRP1	112.309	1	0.00890404	-6.81132
	UNC5B	113.011	1	0.00884873	-6.82031
	PTPRE	113.208	1	0.0088333	-6.82283
	PTP4A1	113.576	1	0.00880465	-6.82752
	SDC1	114.352	1	0.00874492	-6.83734
	SHBG	114.609	1	0.00872528	-6.84058
	EPN3	115.061	1	0.00869107	-6.84625
	FANCC	123.519	1.06656	0.00863481	-6.85562
	ANKRA2	116.138	1	0.00861045	-6.8597
	PYCARD	116.319	1	0.00859702	-6.86195
	SCN3B	116.498	1	0.00858382	-6.86416
	BDKRB2	117.222	1	0.00853079	-6.87311
	CASP6	118.67	1	0.00842672	-6.89081
	FXYD3	118.67	1	0.00842671	-6.89082
	DNMT1	119.131	1	0.00839412	-6.89641
	BTG2	119.434	1	0.00837283	-6.90007
	ARAP2	120.272	1	0.00831448	-6.91016
	PARD6G	120.974	1	0.00826626	-6.91855
	SLC44A5	121.061	1	0.00826027	-6.9196
	IER3	122.816	1	0.00814223	-6.94036
	KDM4B	123.028	1	0.00812821	-6.94285
	GPR87	123.739	1	0.00808154	-6.95115
	SERPINB5	138.974	1.11965	0.00805653	-6.95563
	RGS12	125.438	1	0.00797207	-6.97083
	PLXNB3	126.13	1	0.00792833	-6.97877
	AKAP9	145.719	1.1399	0.00782263	-6.99813
	SESN1	134.531	1.04969	0.00780263	-7.00182
	FAM183A	128.416	1	0.0077872	-7.00468
	GALIG	129.003	1	0.00775178	-7.01126
	PARK2	129.318	1	0.00773286	-7.01478
	DPEP1	129.529	1	0.00772027	-7.01713
	DUSP14	130.282	1	0.00767567	-7.02549
	COL5A1	130.582	1	0.00765805	-7.02881
	KRT15	131.394	1	0.00761072	-7.03775
	LGALS3	254.768	1.93183	0.0075827	-7.04307
	ALDH4A1	134.387	1	0.0074412	-7.07025
	XRCC5	135.339	1	0.00738885	-7.08043
	CASP10	135.624	1	0.00737331	-7.08347
	SAC3D1	136.086	1	0.00734829	-7.08838
	CD82	136.966	1	0.00730109	-7.09767
	BAX	137.124	1	0.00729268	-7.09934
	CPN1	137.198	1	0.00728874	-7.10011
	TRPM2	137.229	1	0.00728709	-7.10044
	DKK1	138.216	1	0.00723504	-7.11078
	TRAF4	138.613	1	0.00721434	-7.11492
	TTC28	138.677	1	0.00721101	-7.11558
	SERTAD1	139.158	1	0.00718606	-7.12058
	DGKI	139.415	1	0.00717283	-7.12324
	NTRK2	140.191	1	0.00713315	-7.13125
	LIF	140.454	1	0.00711978	-7.13395
	NTPCR	143.942	1	0.00694725	-7.16934
	PMAIP1	145.471	1	0.00687423	-7.18459
	DGKA	156.545	1.06656	0.00681313	-7.19747
	PLCL2	147.082	1	0.00679894	-7.20047
	AEN	147.232	1	0.00679199	-7.20195
	ICAM1	147.651	1	0.00677274	-7.20604
	PTPRU	156.446	1.04969	0.00670963	-7.21955
	ATP2B2	149.847	1	0.00667346	-7.22735
	SIDT2	149.983	1	0.0066674	-7.22866
	SCD	150.325	1	0.00665223	-7.23195
	SFN	150.524	1	0.00664345	-7.23385
	C17orf82	150.89	1	0.00662734	-7.23736
	NTF3	172.438	1.1399	0.00661051	-7.24102
	C1orf183	166.406	1.09939	0.00660666	-7.24186
	LYNX1	152.628	1	0.00655188	-7.25387
	IRF5	152.802	1	0.00654442	-7.25552
	PML	153.155	1	0.00652932	-7.25885
	COL21A1	153.433	1	0.00651752	-7.26146
	SULF2	162.18	1.04969	0.00647242	-7.27148
	INPP1	170.398	1.09939	0.00645189	-7.27606
	TNFRSF10C	155.323	1	0.00643821	-7.27912
	BID	155.577	1	0.00642767	-7.28149
	BAI1	156.104	1	0.00640598	-7.28637
	UBD	157.124	1	0.00636439	-7.29576
	MICALL1	157.894	1	0.00633337	-7.30281
	EFNB1	158.283	1	0.0063178	-7.30636
	PKP1	160.197	1	0.00624231	-7.3237
	GJB5	160.229	1	0.00624105	-7.324
	C20orf108	709.72	4.42764	0.00623857	-7.32457
	CYP4F3	196.229	1.21903	0.00621231	-7.33065
	EPHA2	161.35	1	0.00619771	-7.33405
	EBI3	161.971	1	0.00617394	-7.33959
	TSKU	184.942	1.1399	0.00616357	-7.34202
	C13orf15	166.021	1	0.00602332	-7.37523
	TRIM22	167.897	1	0.00595603	-7.39143
	PSTPIP2	333.016	1.97933	0.00594363	-7.39444
	PGPEP1	170.069	1	0.00587997	-7.40997
	RINL	172.723	1	0.00578963	-7.43231
	GAMT	646.541	3.68347	0.0056972	-7.45553
	RFNG	179.249	1	0.00557882	-7.48583
	CRYZ	982.337	5.47692	0.0055754	-7.48671
	TP53INP1	287.7	1.58905	0.0055233	-7.50025
	SCN2A	181.585	1	0.00550708	-7.5045
	HES2	185.271	1	0.00539749	-7.53349
	C3orf16	186.028	1	0.00537554	-7.53937
	POLK	413.378	2.22181	0.00537477	-7.53958
	GADD45A	186.258	1	0.00536889	-7.54116
	APC	186.587	1	0.00535942	-7.54371
	RABGGTA	187.973	1	0.00531992	-7.55438
	S100A2	218.248	1.1399	0.00522298	-7.58091
	TCP11L1	218.654	1.13312	0.00518225	-7.59221
	MAD1L1	194.189	1	0.00514963	-7.60131
	ENC1	195.249	1	0.00512166	-7.60917
	CBS	225.35	1.1399	0.00505837	-7.62711
	ZNF337	218.572	1.09939	0.00502987	-7.63526
	CHMP4C	254.834	1.27981	0.00502213	-7.63749
	SCO2	199.292	1	0.00501777	-7.63874
	RFWD2	220.077	1.09939	0.00499546	-7.64517
	SPRY1	201.066	1	0.00497349	-7.65152
	ZNF654	203.792	1	0.00490696	-7.67096
	ITGA3	204.306	1	0.00489462	-7.67459
	BBC3	231.997	1.13312	0.00488419	-7.67766
	DDR1	205.008	1	0.00487786	-7.67954
	BCL2L14	206.201	1	0.00484964	-7.68791
	C2orf71	219.855	1.04969	0.00477448	-7.71044
	ABCA1	237.854	1.13312	0.00476392	-7.71364
	PRKAB1	212.105	1	0.00471465	-7.72863
	MET	240.942	1.13312	0.00470286	-7.73225
	CSF1	224.957	1.04969	0.00466619	-7.74354
	SH2D1A	237.13	1.09939	0.00463622	-7.75284
	EPS8L2	215.947	1	0.00463078	-7.75453
	PROM2	230.304	1.04969	0.00455786	-7.77743
	LAMA3	249.207	1.13312	0.0045469	-7.7809
	TP73	242	1.09939	0.00454292	-7.78217
	ABHD4	249.898	1.13312	0.00453433	-7.7849
	SCARA3	221.402	1	0.00451668	-7.79052
	KLHDC7A	243.971	1.09939	0.00450623	-7.79386
	ABCB1	253.452	1.1399	0.00449752	-7.79665
	RB1	253.517	1.1399	0.00449635	-7.79703
	PGF	225.061	1	0.00444325	-7.81417
	LAPTM5	381.713	1.69572	0.00444238	-7.81445
	NDRG4	226.074	1	0.00442333	-7.82065
	ZNF561	227.535	1	0.00439492	-7.82995
	MYBPC3	227.917	1	0.00438757	-7.83236
	COL4A1	292.378	1.27981	0.00437723	-7.83576
	WRAP73	228.556	1	0.0043753	-7.8364
	ASCC3	232.319	1	0.00430443	-7.85996
	KRT8	232.721	1	0.00429699	-7.86246
	RRM2B	493.794	2.11923	0.00429173	-7.86423
	ABCB9	234.367	1	0.00426681	-7.87263
	COL6A3	267.535	1.1399	0.00426076	-7.87467
	CYP21A2	236.521	1	0.00422796	-7.88582
	SCGB1D2	237.657	1	0.00420775	-7.89274
	PGAP1	237.784	1	0.0042055	-7.89351
	CDKN1A	238.893	1	0.00418598	-7.90022
	RHOD	362.935	1.50802	0.00415507	-7.91091
	CX3CL1	259.848	1.06995	0.0041176	-7.92398
	TP53TG1	281.194	1.13312	0.00402967	-7.95512
	DUOX1	264.63	1.04969	0.00396664	-7.97787
	HRAS	253.028	1	0.00395213	-7.98315
	APOBEC3C	293.399	1.1399	0.00388517	-8.00781
	BLOC1S2	293.399	1.1399	0.00388517	-8.00781
	PTK2	274.994	1.06656	0.00387847	-8.0103
	AIFM2	260.824	1	0.00383401	-8.02693
	GLS2	451.738	1.69572	0.00375376	-8.05745
	GDF15	267.535	1	0.00373783	-8.06358
	TSC2	457.466	1.69952	0.00371507	-8.0724
	FAS	308.733	1.13312	0.00367022	-8.08992
	NDRG1	273.736	1	0.00365315	-8.09664
	GML	574.281	2.09327	0.00364502	-8.09986
	TMEM68	275.268	1	0.00363282	-8.10469
	TNFRSF10B	413.57	1.49694	0.00361955	-8.10997
	KANK3	290.091	1.04969	0.0036185	-8.11039
	KCNN4	283.132	1	0.00353192	-8.14533
	CCDC90B	468.798	1.62957	0.00347605	-8.16833
	RPS27L	367.05	1.26873	0.00345655	-8.17645
	HGF	290.701	1	0.00343996	-8.18339
	EEF1A1	293.889	1	0.00340265	-8.19913
	HSP90AB1	313.044	1.04969	0.00335319	-8.22025
	STEAP3	942.824	3.12989	0.0033197	-8.23473
	SYTL1	302.481	1	0.00330599	-8.2407
	VDR	304.816	1	0.00328067	-8.25179
	CCNK	350.062	1.13312	0.0032369	-8.27117
	INPP5D	392.774	1.26624	0.00322383	-8.27701
	CASP1	310.335	1	0.00322232	-8.27768
	POLH	343.58	1.09939	0.0031998	-8.2878
	PCNA	312.977	1	0.00319513	-8.28991
	CMBL	467.445	1.48966	0.00318682	-8.29367
	PPM1J	313.899	1	0.00318574	-8.29416
	C12orf5	358.116	1.1399	0.00318305	-8.29537
	AKR1B10	315.446	1	0.00317012	-8.30125
	UIMC1	316.17	1	0.00316286	-8.30455
	EGFR	380.599	1.19878	0.00314971	-8.31056
	MLH1	692.564	2.1297	0.0030751	-8.34515
	BNIP3L	356.907	1.06995	0.00299785	-8.38186
	TRIAP1	391.376	1.16934	0.00298777	-8.38672
	CDC25C	383.563	1.1399	0.00297188	-8.39441
	NINJ1	338.941	1	0.00295037	-8.40489
	DDIT4	406.397	1.19878	0.00294977	-8.40518
	PMS2	382.014	1.11965	0.00293091	-8.41444
	ODC1	905.157	2.63474	0.00291081	-8.42436
	GBE1	559.078	1.59633	0.00285528	-8.45215
	FLJ41841	377.316	1.04969	0.002782	-8.48966
	RETSAT	412.394	1.13312	0.00274766	-8.50758
	PERP	560.475	1.53247	0.00273424	-8.51464
	RAD51C	385.755	1.04969	0.00272114	-8.52157
	CTSF	389.712	1.04969	0.00269351	-8.5363
	ISCU	699.671	1.83942	0.00262898	-8.57128
	XPC	385.798	1	0.00259203	-8.5917
	ERCC5	428.707	1.09939	0.00256443	-8.60715
	TAP1	560.475	1.41971	0.00253305	-8.62491
	ASTN2	445.151	1.09939	0.0024697	-8.66145
	SLC30A1	727.234	1.7951	0.0024684	-8.66221
	PDGFC	532.591	1.29816	0.00243745	-8.68041
	CHAC1	509.761	1.19878	0.00235164	-8.73212
	ANXA4	464.326	1.06995	0.00230431	-8.76145
	GPR56	498.401	1.1399	0.00228712	-8.77225
	ACER2	440.651	1	0.00226937	-8.78349
	CTSD	485.668	1.09939	0.00226366	-8.78712
	GSS	517.552	1	0.00193217	-9.01556
	COL18A1	664.381	1.2822	0.00192992	-9.01725
	FRMPD2	519.994	1	0.0019231	-9.02235
	CPE	729.4	1.27981	0.0017546	-9.15464
	DOCK8	2051.61	3.45638	0.00168471	-9.21328
	CCNG1	783.231	1.1399	0.00145539	-9.42438
	ACTA2	1569	2.25913	0.00143986	-9.43986
	ANLN	802.251	1.09939	0.00137038	-9.51121
	MSH2	999.135	1.36472	0.0013659	-9.51593
	IGFBP3	1022.32	1.26624	0.00123859	-9.65709
	DEF6	951.05	1.1399	0.00119857	-9.70446
	For details on read count analysis see Extended Experimental Procedures.

## Sheet: GW library
	GeneName	DMSO (count)	Nutlin (count)	FC	log2(FC)
	TP53	45.6711	305.14	6.68124	2.74012
	PRAMEF9	1.0189	1	0.981454	-0.0270074
	HLA-DQA2	1.0189	1	0.981454	-0.0270074
	C17orf78	1.0189	1	0.981454	-0.0270074
	STAU2	1.0189	1	0.981454	-0.0270074
	PHLDB3	1.0189	1	0.981454	-0.0270074
	GOLGA8A	1.0189	1	0.981454	-0.0270074
	FLJ32679	1.0189	1	0.981454	-0.0270074
	PHACTR4	1.0189	1	0.981454	-0.0270074
	LOC402200	1.0189	1	0.981454	-0.0270074
	LOC401109	1.0189	1	0.981454	-0.0270074
	COG1	1.0189	1	0.981454	-0.0270074
	PABPC1L2A	1.0189	1	0.981454	-0.0270074
	LOC391707	1.0189	1	0.981454	-0.0270074
	MARCKS	1.0189	1	0.981454	-0.0270074
	PARP16	1.0189	1	0.981454	-0.0270074
	SERPINI2	1.02691	1	0.973798	-0.0383053
	HMGB3P27	1.02691	1	0.973798	-0.0383053
	ORAI2	1.02691	1	0.973798	-0.0383053
	DAZ4	1.03708	1	0.964249	-0.0525222
	CCDC19	1.03708	1	0.964249	-0.0525222
	RPAIN	1.03708	1	0.964249	-0.0525222
	NOX3	1.03708	1	0.964249	-0.0525222
	LOC401233	1.03708	1	0.964249	-0.0525222
	LRRC37A3	1.03708	1	0.964249	-0.0525222
	C8orf82	1.03708	1	0.964249	-0.0525222
	NCRNA00114	1.03708	1	0.964249	-0.0525222
	CTAGE15P	1.03708	1	0.964249	-0.0525222
	CORO7	1.03708	1	0.964249	-0.0525222
	FAR1	1.03708	1	0.964249	-0.0525222
	NKAPL	1.03708	1	0.964249	-0.0525222
	THNSL2	1.03708	1	0.964249	-0.0525222
	MGC21881	1.03708	1	0.964249	-0.0525222
	OR10AG1	1.03708	1	0.964249	-0.0525222
	HAO2	1.03779	1	0.963583	-0.0535185
	FLJ16323	1.03779	1	0.963583	-0.0535185
	CSPG5	1.03779	1	0.963583	-0.0535185
	SHROOM2	1.03779	1	0.963583	-0.0535185
	LOC391352	1.03779	1	0.963583	-0.0535185
	B3GAT2	1.03779	1	0.963583	-0.0535185
	IGFL1	1.03779	1	0.963583	-0.0535185
	LOC391746	1.03779	1	0.963583	-0.0535185
	RPS17P16	1.03779	1	0.963583	-0.0535185
	DMBX1	1.03779	1	0.963583	-0.0535185
	NT5C	1.03779	1	0.963583	-0.0535185
	CEP192	1.03779	1	0.963583	-0.0535185
	GMDS	1.03779	1	0.963583	-0.0535185
	LOC283801	1.03779	1	0.963583	-0.0535185
	LOC342541	1.03779	1	0.963583	-0.0535185
	H2BFS	1.03779	1	0.963583	-0.0535185
	RPL9	1.03779	1	0.963583	-0.0535185
	SON	1.03779	1	0.963583	-0.0535185
	DDX4	1.03779	1	0.963583	-0.0535185
	BTN1A1	1.03779	1	0.963583	-0.0535185
	LOC196120	1.03779	1	0.963583	-0.0535185
	ACOT7	1.03779	1	0.963583	-0.0535185
	LOC143158	1.03779	1	0.963583	-0.0535185
	EIF3B	1.03779	1	0.963583	-0.0535185
	DUX4L15	1.03779	1	0.963583	-0.0535185
	EIF3CL	1.03779	1	0.963583	-0.0535185
	OR4C3	1.03779	1	0.963583	-0.0535185
	HAPLN4	1.03779	1	0.963583	-0.0535185
	DUOXA2	1.03779	1	0.963583	-0.0535185
	DGKK	1.03779	1	0.963583	-0.0535185
	RPS15	1.03779	1	0.963583	-0.0535185
	PCDHB11	1.03779	1	0.963583	-0.0535185
	ZNF587	1.03779	1	0.963583	-0.0535185
	ZNF829	1.03779	1	0.963583	-0.0535185
	SNX29	1.03779	1	0.963583	-0.0535185
	POM121L9P	1.03779	1	0.963583	-0.0535185
	ZNF117	1.05381	1	0.948934	-0.0756198
	KCNG4	1.05381	1	0.948934	-0.0756198
	LOC284581	1.05381	1	0.948934	-0.0756198
	MRPL37	1.05381	1	0.948934	-0.0756198
	RAP1GAP2	1.05381	1	0.948934	-0.0756198
	CT45A1	1.05381	1	0.948934	-0.0756198
	CHRM4	1.05381	1	0.948934	-0.0756198
	LOC136157	1.05381	1	0.948934	-0.0756198
	KIR2DL5B	1.05381	1	0.948934	-0.0756198
	TUBGCP4	1.05381	1	0.948934	-0.0756198
	ARHGAP39	1.05381	1	0.948934	-0.0756198
	ARHGAP24	1.05381	1	0.948934	-0.0756198
	BIN2	1.05381	1	0.948934	-0.0756198
	HIST1H2AA	1.05381	1	0.948934	-0.0756198
	CAPN10	1.05381	1	0.948934	-0.0756198
	TTYH2	1.05381	1	0.948934	-0.0756198
	DKFZp564A176	1.05381	1	0.948934	-0.0756198
	NAALADL2	1.05381	1	0.948934	-0.0756198
	SEPT10	1.05381	1	0.948934	-0.0756198
	LOC121792	1.05381	1	0.948934	-0.0756198
	ALPI	1.05381	1	0.948934	-0.0756198
	LOC402434	1.05381	1	0.948934	-0.0756198
	C14orf166B	1.05381	1	0.948934	-0.0756198
	UTP20	1.05381	1	0.948934	-0.0756198
	IPMK	1.05381	1	0.948934	-0.0756198
	ZNF66P	1.05381	1	0.948934	-0.0756198
	LOC391062	1.05381	1	0.948934	-0.0756198
	SERPINA5	1.05381	1	0.948934	-0.0756198
	C4orf32	1.05669	1	0.946352	-0.0795512
	CHST6	1.05669	1	0.946352	-0.0795512
	NSUN5P1	1.05669	1	0.946352	-0.0795512
	NUP210L	1.05669	1	0.946352	-0.0795512
	FAM164C	1.05669	1	0.946352	-0.0795512
	GLI2	1.05669	1	0.946352	-0.0795512
	PDE6H	1.05669	1	0.946352	-0.0795512
	PVRIG	1.05669	1	0.946352	-0.0795512
	THEM4	1.06398	1	0.939864	-0.0894754
	MED19	1.0647	1	0.939232	-0.0904465
	KIR2DS1	1.07271	1	0.932218	-0.10126
	C14orf183	1.07415	1	0.930966	-0.103199
	TNFAIP8L3	1.07415	1	0.930966	-0.103199
	ANKMY1	1.07415	1	0.930966	-0.103199
	CYP2B6	1.07415	1	0.930966	-0.103199
	C10orf99	1.07415	1	0.930966	-0.103199
	SLC6A16	1.07415	1	0.930966	-0.103199
	OR52B6	1.07415	1	0.930966	-0.103199
	C1orf183	1.07415	1	0.930966	-0.103199
	PLEKHG3	1.07415	1	0.930966	-0.103199
	KLF16	1.07415	1	0.930966	-0.103199
	LOC391359	1.07415	1	0.930966	-0.103199
	EPHX1	1.07415	1	0.930966	-0.103199
	TTC37	1.07415	1	0.930966	-0.103199
	OS9	1.07415	1	0.930966	-0.103199
	SULT1C4	1.07415	1	0.930966	-0.103199
	BACE2	1.07415	1	0.930966	-0.103199
	RFTN1	1.07415	1	0.930966	-0.103199
	MMP11	1.07415	1	0.930966	-0.103199
	NR2C2AP	1.07415	1	0.930966	-0.103199
	LOC346096	1.07415	1	0.930966	-0.103199
	C14orf37	1.07415	1	0.930966	-0.103199
	ANP32D	1.07415	1	0.930966	-0.103199
	SMA5	1.07415	1	0.930966	-0.103199
	ZNF539	1.07415	1	0.930966	-0.103199
	SGCZ	1.07415	1	0.930966	-0.103199
	PTTG1	1.07415	1	0.930966	-0.103199
	C3P1	1.07415	1	0.930966	-0.103199
	PPIA	1.07415	1	0.930966	-0.103199
	LOC341098	1.07415	1	0.930966	-0.103199
	ATP1A3	1.07415	1	0.930966	-0.103199
	ARHGAP28	1.07415	1	0.930966	-0.103199
	ARHGAP31	1.07415	1	0.930966	-0.103199
	UBE2D4	1.07415	1	0.930966	-0.103199
	LOC441655	1.07415	1	0.930966	-0.103199
	LOC376765	1.07415	1	0.930966	-0.103199
	C20orf166	1.07559	1	0.929726	-0.105122
	SLAMF9	1.07559	1	0.929726	-0.105122
	MMRN2	1.07559	1	0.929726	-0.105122
	HECTD1	1.07559	1	0.929726	-0.105122
	PRDM15	1.07559	1	0.929726	-0.105122
	ZDHHC14	1.07559	1	0.929726	-0.105122
	C20orf79	1.07559	1	0.929726	-0.105122
	LOC202201	1.07559	1	0.929726	-0.105122
	KRTAP9-4	1.07559	1	0.929726	-0.105122
	PDE12	1.07559	1	0.929726	-0.105122
	SEL1L	1.07559	1	0.929726	-0.105122
	RBMY1J	1.07559	1	0.929726	-0.105122
	KRT19	1.07559	1	0.929726	-0.105122
	LOC442370	1.07559	1	0.929726	-0.105122
	PET112L	1.07559	1	0.929726	-0.105122
	EIF3C	1.07559	1	0.929726	-0.105122
	FLJ41733	1.07559	1	0.929726	-0.105122
	HNRNPA3	1.08072	1	0.925309	-0.111993
	RSPO4	1.08072	1	0.925309	-0.111993
	FSCB	1.09448	1	0.913674	-0.130248
	LOC387790	1.09448	1	0.913674	-0.130248
	VCX2	1.09448	1	0.913674	-0.130248
	FAM45B	1.09448	1	0.913674	-0.130248
	CALB1	1.09448	1	0.913674	-0.130248
	MFAP2	1.10106	1	0.908216	-0.138893
	HIST1H2BF	1.10249	1	0.907036	-0.140769
	SLC38A11	1.10763	1	0.902831	-0.147473
	CELA3A	1.10763	1	0.902831	-0.147473
	C9orf139	1.10763	1	0.902831	-0.147473
	IRGC	1.10763	1	0.902831	-0.147473
	MT1DP	1.10763	1	0.902831	-0.147473
	LOC256374	1.10763	1	0.902831	-0.147473
	FBRS	1.10763	1	0.902831	-0.147473
	EP400NL	1.10763	1	0.902831	-0.147473
	HIST1H2AH	1.10763	1	0.902831	-0.147473
	ZNF425	1.10763	1	0.902831	-0.147473
	GAGE12C	1.10763	1	0.902831	-0.147473
	LOC440344	1.10763	1	0.902831	-0.147473
	MICAL3	1.10763	1	0.902831	-0.147473
	AMAC1L2	1.10763	1	0.902831	-0.147473
	CSH2	1.10763	1	0.902831	-0.147473
	ADO	1.10763	1	0.902831	-0.147473
	LOC440043	1.10763	1	0.902831	-0.147473
	AHCYL2	1.10763	1	0.902831	-0.147473
	TBXA2R	1.10763	1	0.902831	-0.147473
	FAHD2A	1.11123	1	0.899904	-0.152156
	SERPINA12	1.11123	1	0.899904	-0.152156
	KIAA0367	1.11123	1	0.899904	-0.152156
	FRAT1	1.11123	1	0.899904	-0.152156
	C3orf15	1.11123	1	0.899904	-0.152156
	KRTAP4-11	1.11123	1	0.899904	-0.152156
	ANKRD20A5	1.11123	1	0.899904	-0.152156
	C19orf23	1.11123	1	0.899904	-0.152156
	RPS16	1.11123	1	0.899904	-0.152156
	ZNF839	1.11123	1	0.899904	-0.152156
	NAT2	1.11338	1	0.898167	-0.154944
	EFCAB4B	1.11338	1	0.898167	-0.154944
	LOC401198	1.11338	1	0.898167	-0.154944
	ASTN1	1.11338	1	0.898167	-0.154944
	GNA12	1.11338	1	0.898167	-0.154944
	GPR25	1.11338	1	0.898167	-0.154944
	CCDC97	1.11338	1	0.898167	-0.154944
	CENPW	1.11338	1	0.898167	-0.154944
	PIM2	1.11338	1	0.898167	-0.154944
	HIST1H2BJ	1.11338	1	0.898167	-0.154944
	LGALS4	1.11338	1	0.898167	-0.154944
	LOC400464	1.11338	1	0.898167	-0.154944
	SDK2	1.11338	1	0.898167	-0.154944
	ANGPTL7	1.11338	1	0.898167	-0.154944
	SDHAP1	1.11338	1	0.898167	-0.154944
	KRTAP19-1	1.11338	1	0.898167	-0.154944
	KLHL34	1.11338	1	0.898167	-0.154944
	SPPL2B	1.11338	1	0.898167	-0.154944
	DLG5	1.11338	1	0.898167	-0.154944
	ANKRD18B	1.1294	1	0.885426	-0.175556
	NSUN4	1.13013	1	0.884857	-0.176483
	GDA	1.13227	1	0.883178	-0.179224
	PROL1	1.13453	1	0.881419	-0.1821
	MUC13	1.13453	1	0.881419	-0.1821
	CYP2A7	1.13453	1	0.881419	-0.1821
	ZC3H12A	1.13453	1	0.881419	-0.1821
	C19orf12	1.13453	1	0.881419	-0.1821
	C11orf55	1.13453	1	0.881419	-0.1821
	DOK3	1.13453	1	0.881419	-0.1821
	TMEM8B	1.13453	1	0.881419	-0.1821
	MAPK7	1.1447	1	0.873589	-0.194974
	NPIPL2	1.14542	1	0.873042	-0.195877
	KIR2DL3	1.14831	1	0.870848	-0.199507
	LOC200261	1.14831	1	0.870848	-0.199507
	ENTPD2	1.14831	1	0.870848	-0.199507
	C8orf40	1.14831	1	0.870848	-0.199507
	ECH1	1.14831	1	0.870848	-0.199507
	ADPRHL2	1.14831	1	0.870848	-0.199507
	LOC51612	1.14831	1	0.870848	-0.199507
	KIAA1683	1.14831	1	0.870848	-0.199507
	OR5M1	1.14831	1	0.870848	-0.199507
	LOC441956	1.14831	1	0.870848	-0.199507
	MOBKL2A	1.14831	1	0.870848	-0.199507
	TMSB4X	1.14831	1	0.870848	-0.199507
	C11orf64	1.14831	1	0.870848	-0.199507
	PGLYRP2	1.14831	1	0.870848	-0.199507
	ETF1	1.14831	1	0.870848	-0.199507
	LOC285544	1.14831	1	0.870848	-0.199507
	SRRT	1.14831	1	0.870848	-0.199507
	LHFPL3	1.14831	1	0.870848	-0.199507
	LOC402677	1.14831	1	0.870848	-0.199507
	FLJ44955	1.14831	1	0.870848	-0.199507
	FLJ46020	1.14831	1	0.870848	-0.199507
	EPCAM	1.14831	1	0.870848	-0.199507
	HAX1	1.14831	1	0.870848	-0.199507
	LIPJ	1.14831	1	0.870848	-0.199507
	SSX4	1.14831	1	0.870848	-0.199507
	TSNAX	1.14831	1	0.870848	-0.199507
	OLAH	1.14831	1	0.870848	-0.199507
	NCL	1.14831	1	0.870848	-0.199507
	FAM182A	1.14974	1	0.869763	-0.201306
	RTDR1	1.15117	1	0.86868	-0.203103
	DCAF4L1	1.15117	1	0.86868	-0.203103
	SPP1	1.15117	1	0.86868	-0.203103
	MMP24	1.15117	1	0.86868	-0.203103
	LRIG3	1.15117	1	0.86868	-0.203103
	BOD1L	1.15117	1	0.86868	-0.203103
	UCHL5	1.15117	1	0.86868	-0.203103
	LOC245718	1.15117	1	0.86868	-0.203103
	GABRR3	1.15117	1	0.86868	-0.203103
	HIST1H2AM	1.15117	1	0.86868	-0.203103
	BCAS4	1.15117	1	0.86868	-0.203103
	C18orf34	1.15117	1	0.86868	-0.203103
	LRRC66	1.15117	1	0.86868	-0.203103
	RPS3A	1.15117	1	0.86868	-0.203103
	F8A3	1.15487	1	0.865896	-0.207735
	LRRC7	1.16144	1	0.860999	-0.215916
	DAZ3	1.16144	1	0.860999	-0.215916
	KREMEN1	1.16144	1	0.860999	-0.215916
	LOC391742	1.16144	1	0.860999	-0.215916
	SPDYE7P	1.16144	1	0.860999	-0.215916
	LOC401280	1.16144	1	0.860999	-0.215916
	EME2	1.16144	1	0.860999	-0.215916
	CPS1	1.16144	1	0.860999	-0.215916
	DNASE2B	1.16144	1	0.860999	-0.215916
	CLEC18A	1.16144	1	0.860999	-0.215916
	STAB2	1.16144	1	0.860999	-0.215916
	WDR62	1.16144	1	0.860999	-0.215916
	KIR2DS2	1.16144	1	0.860999	-0.215916
	HIST1H2BK	1.16144	1	0.860999	-0.215916
	CNNM3	1.16144	1	0.860999	-0.215916
	CANT1	1.16144	1	0.860999	-0.215916
	KIAA1751	1.16144	1	0.860999	-0.215916
	CDH15	1.16144	1	0.860999	-0.215916
	TMEM143	1.16144	1	0.860999	-0.215916
	PFKFB4	1.16144	1	0.860999	-0.215916
	C11orf92	1.16144	1	0.860999	-0.215916
	RWDD3	1.16144	1	0.860999	-0.215916
	RAN	1.17007	1	0.854651	-0.226592
	PLRG1	1.17007	1	0.854651	-0.226592
	LIG1	1.17007	1	0.854651	-0.226592
	MAMSTR	1.18034	1	0.847215	-0.239199
	AAA1	1.18034	1	0.847215	-0.239199
	ARSA	1.18538	1	0.84361	-0.245352
	KRTAP4-7	1.18538	1	0.84361	-0.245352
	ARHGEF19	1.18538	1	0.84361	-0.245352
	LOC147804	1.18538	1	0.84361	-0.245352
	FAM19A5	1.18538	1	0.84361	-0.245352
	C12orf36	1.18825	1	0.841575	-0.248836
	MT1H	1.18825	1	0.841575	-0.248836
	ZNF385C	1.18835	1	0.841504	-0.248957
	PAGE2	1.18835	1	0.841504	-0.248957
	SPP2	1.18835	1	0.841504	-0.248957
	OSBPL7	1.18835	1	0.841504	-0.248957
	TMEM60	1.18835	1	0.841504	-0.248957
	C1orf87	1.18835	1	0.841504	-0.248957
	GJB3	1.18896	1	0.841068	-0.249705
	ATP10D	1.18896	1	0.841068	-0.249705
	OAZ3	1.18896	1	0.841068	-0.249705
	ODF3B	1.18896	1	0.841068	-0.249705
	RND1	1.18896	1	0.841068	-0.249705
	DMWD	1.18896	1	0.841068	-0.249705
	INPP5A	1.18896	1	0.841068	-0.249705
	HELQ	1.18896	1	0.841068	-0.249705
	MGC39545	1.18896	1	0.841068	-0.249705
	VASH1	1.18896	1	0.841068	-0.249705
	LILRP2	1.18896	1	0.841068	-0.249705
	SSX8	1.18896	1	0.841068	-0.249705
	DNAJC9	1.18896	1	0.841068	-0.249705
	LOC439953	1.18896	1	0.841068	-0.249705
	MRPS26	1.18896	1	0.841068	-0.249705
	MMP13	1.19195	1	0.838962	-0.253323
	MAGEC1	1.19195	1	0.838962	-0.253323
	SLC25A46	1.1941	1	0.837451	-0.255922
	ERAP2	1.20211	1	0.831871	-0.265568
	TCTN3	1.20428	1	0.830373	-0.268169
	MAN2B2	1.20714	1	0.828401	-0.271598
	FBXW4	1.20786	1	0.82791	-0.272454
	PRAMEF18	1.20786	1	0.82791	-0.272454
	CHL1	1.20869	1	0.827344	-0.273441
	BASE	1.21229	1	0.824886	-0.277733
	BEX1	1.21525	1	0.822873	-0.281259
	PRKAA2	1.21525	1	0.822873	-0.281259
	ACAN	1.21525	1	0.822873	-0.281259
	PLEKHG1	1.21525	1	0.822873	-0.281259
	HSPB9	1.21525	1	0.822873	-0.281259
	VN1R3	1.21525	1	0.822873	-0.281259
	DCHS1	1.21525	1	0.822873	-0.281259
	MYLK4	1.21525	1	0.822873	-0.281259
	OR10H1	1.21525	1	0.822873	-0.281259
	PCDHB12	1.21525	1	0.822873	-0.281259
	SPARC	1.21525	1	0.822873	-0.281259
	SAFB2	1.21525	1	0.822873	-0.281259
	LCE1F	1.21525	1	0.822873	-0.281259
	PLEKHH3	1.21525	1	0.822873	-0.281259
	MT1F	1.21525	1	0.822873	-0.281259
	PTTG2	1.21525	1	0.822873	-0.281259
	OR10A2	1.21525	1	0.822873	-0.281259
	LOC387720	1.21525	1	0.822873	-0.281259
	DPP10	1.21525	1	0.822873	-0.281259
	C11orf49	1.22246	1	0.818024	-0.289785
	DOK1	1.22246	1	0.818024	-0.289785
	LPA	1.22246	1	0.818024	-0.289785
	DDX10	1.22246	1	0.818024	-0.289785
	KIAA1046	1.22246	1	0.818024	-0.289785
	CTGLF4	1.22246	1	0.818024	-0.289785
	CCS	1.22246	1	0.818024	-0.289785
	C16orf87	1.22246	1	0.818024	-0.289785
	NEK6	1.22246	1	0.818024	-0.289785
	TRHDE	1.22246	1	0.818024	-0.289785
	C16orf52	1.22246	1	0.818024	-0.289785
	RASGRP2	1.22246	1	0.818024	-0.289785
	SH2B1	1.22246	1	0.818024	-0.289785
	WBP2NL	1.22246	1	0.818024	-0.289785
	APOL5	1.22246	1	0.818024	-0.289785
	FAM163A	1.22246	1	0.818024	-0.289785
	RPS26P15	1.22246	1	0.818024	-0.289785
	GGT1	1.22246	1	0.818024	-0.289785
	LOC643923	1.22246	1	0.818024	-0.289785
	MED10	1.22246	1	0.818024	-0.289785
	ZNF98	1.22246	1	0.818024	-0.289785
	CASS4	1.22246	1	0.818024	-0.289785
	AMICA1	1.22246	1	0.818024	-0.289785
	SLC22A1	1.22246	1	0.818024	-0.289785
	TMEM232	1.22246	1	0.818024	-0.289785
	GBA2	1.22317	1	0.817545	-0.290631
	NKX1-1	1.22676	1	0.815157	-0.29485
	CCDC94	1.22676	1	0.815157	-0.29485
	ADCK2	1.22676	1	0.815157	-0.29485
	MEGF8	1.22676	1	0.815157	-0.29485
	TPD52L1	1.22676	1	0.815157	-0.29485
	HIST2H3D	1.22676	1	0.815157	-0.29485
	RPAP3	1.22676	1	0.815157	-0.29485
	DIO3	1.22676	1	0.815157	-0.29485
	PUM2	1.22676	1	0.815157	-0.29485
	HIST1H4F	1.22676	1	0.815157	-0.29485
	RNF157	1.22676	1	0.815157	-0.29485
	ADRB1	1.22676	1	0.815157	-0.29485
	BTF3	1.23189	1	0.81176	-0.300876
	FIGNL2	1.23415	1	0.810274	-0.303519
	TRIM11	1.23703	1	0.80839	-0.306877
	TIMP3	1.2392	1	0.806975	-0.309404
	PPIL4	1.2399	1	0.806515	-0.310226
	CELA2A	1.24135	1	0.805571	-0.311916
	CHMP2A	1.24135	1	0.805571	-0.311916
	OR6B2	1.24216	1	0.805048	-0.312853
	RBMY1B	1.24216	1	0.805048	-0.312853
	RPUSD4	1.24216	1	0.805048	-0.312853
	FBXO48	1.24494	1	0.803253	-0.316073
	FLJ40194	1.24565	1	0.802791	-0.316903
	CPVL	1.24565	1	0.802791	-0.316903
	PSG4	1.24576	1	0.802721	-0.31703
	SLC39A11	1.25233	1	0.798511	-0.324616
	SEMG1	1.25953	1	0.793944	-0.332891
	TG	1.25953	1	0.793944	-0.332891
	CEP57L1	1.25953	1	0.793944	-0.332891
	SLC10A7	1.25953	1	0.793944	-0.332891
	ATP8A1	1.26097	1	0.793042	-0.334531
	C17orf65	1.26106	1	0.792985	-0.334634
	CDH18	1.26106	1	0.792985	-0.334634
	KIAA1310	1.26455	1	0.790795	-0.338624
	HTR3C	1.26455	1	0.790795	-0.338624
	DENND1C	1.26455	1	0.790795	-0.338624
	LOC392254	1.26455	1	0.790795	-0.338624
	PCSK2	1.26455	1	0.790795	-0.338624
	TPM2	1.26455	1	0.790795	-0.338624
	ACOT2	1.26455	1	0.790795	-0.338624
	GOLGA3	1.26455	1	0.790795	-0.338624
	KIAA1524	1.26455	1	0.790795	-0.338624
	SSPO	1.26455	1	0.790795	-0.338624
	CITED4	1.26455	1	0.790795	-0.338624
	DOHH	1.26455	1	0.790795	-0.338624
	IFT172	1.2661	1	0.789825	-0.340394
	RAB3IP	1.2661	1	0.789825	-0.340394
	OR13D1	1.26907	1	0.78798	-0.34377
	GGT3P	1.26907	1	0.78798	-0.34377
	LOC440582	1.26907	1	0.78798	-0.34377
	RAGE	1.26907	1	0.78798	-0.34377
	ATG16L2	1.26907	1	0.78798	-0.34377
	MYBPC3	1.26907	1	0.78798	-0.34377
	FAM71E1	1.26907	1	0.78798	-0.34377
	C6orf227	1.26907	1	0.78798	-0.34377
	TDRD3	1.26907	1	0.78798	-0.34377
	AMIGO3	1.26907	1	0.78798	-0.34377
	PIK3CG	1.26907	1	0.78798	-0.34377
	CDH11	1.26907	1	0.78798	-0.34377
	RAB18	1.26907	1	0.78798	-0.34377
	FLJ37266	1.26907	1	0.78798	-0.34377
	DBX1	1.26907	1	0.78798	-0.34377
	NPM2	1.26907	1	0.78798	-0.34377
	RBMS3	1.26907	1	0.78798	-0.34377
	KNG1	1.26907	1	0.78798	-0.34377
	ZNF696	1.26907	1	0.78798	-0.34377
	DKFZp566H0824	1.27194	1	0.786198	-0.347035
	ADPGK	1.2777	1	0.782659	-0.353544
	C1orf104	1.27915	1	0.781771	-0.355183
	MOXD1	1.28058	1	0.780896	-0.356798
	RUNDC2A	1.28345	1	0.779152	-0.360023
	CDC42EP3	1.29084	1	0.774689	-0.368311
	PDE4C	1.29598	1	0.77162	-0.374038
	MCART1	1.29598	1	0.77162	-0.374038
	SOX21	1.29598	1	0.77162	-0.374038
	TRRAP	1.29661	1	0.771241	-0.374746
	ASCL3	1.29661	1	0.771241	-0.374746
	FAM83H	1.29661	1	0.771241	-0.374746
	RTN4RL2	1.29661	1	0.771241	-0.374746
	C13orf16	1.29661	1	0.771241	-0.374746
	RHO	1.29661	1	0.771241	-0.374746
	CHRNA6	1.29661	1	0.771241	-0.374746
	RDH13	1.29661	1	0.771241	-0.374746
	INSL6	1.29661	1	0.771241	-0.374746
	PCNT	1.29661	1	0.771241	-0.374746
	FKSG2	1.29661	1	0.771241	-0.374746
	CHPF	1.29661	1	0.771241	-0.374746
	ALS2	1.29661	1	0.771241	-0.374746
	RNF215	1.29661	1	0.771241	-0.374746
	GFER	1.29661	1	0.771241	-0.374746
	C20orf160	1.29661	1	0.771241	-0.374746
	NTS	1.29661	1	0.771241	-0.374746
	PLEKHG4	1.29661	1	0.771241	-0.374746
	TEX11	1.29661	1	0.771241	-0.374746
	OR6V1	1.29661	1	0.771241	-0.374746
	ATP9B	1.29661	1	0.771241	-0.374746
	LOC441179	1.29661	1	0.771241	-0.374746
	SMPD5	1.29661	1	0.771241	-0.374746
	LASS3	1.30234	1	0.767847	-0.381109
	SSX1	1.30234	1	0.767847	-0.381109
	KRTAP10-5	1.30234	1	0.767847	-0.381109
	RAB41	1.30234	1	0.767847	-0.381109
	TYW3	1.30234	1	0.767847	-0.381109
	FLJ39653	1.30234	1	0.767847	-0.381109
	SSPN	1.30234	1	0.767847	-0.381109
	PCBD2	1.30234	1	0.767847	-0.381109
	C9orf156	1.30234	1	0.767847	-0.381109
	TSTD2	1.30234	1	0.767847	-0.381109
	HIST1H2BL	1.30234	1	0.767847	-0.381109
	AGBL3	1.30234	1	0.767847	-0.381109
	C20orf4	1.30686	1	0.765192	-0.386106
	DND1	1.31261	1	0.76184	-0.392441
	PKD1L1	1.31551	1	0.760163	-0.39562
	PLA2G3	1.31694	1	0.759336	-0.39719
	METTL4	1.32288	1	0.755925	-0.403684
	MGC16075	1.32288	1	0.755925	-0.403684
	SERPINB12	1.32288	1	0.755925	-0.403684
	CIDEB	1.32288	1	0.755925	-0.403684
	CRISPLD1	1.32288	1	0.755925	-0.403684
	FAM158A	1.32288	1	0.755925	-0.403684
	RPL7AP66	1.32288	1	0.755925	-0.403684
	RPL31P50	1.32288	1	0.755925	-0.403684
	UTS2R	1.32288	1	0.755925	-0.403684
	RNF44	1.32288	1	0.755925	-0.403684
	MIDN	1.32288	1	0.755925	-0.403684
	CPA5	1.32288	1	0.755925	-0.403684
	LOC391761	1.32288	1	0.755925	-0.403684
	MT1G	1.32288	1	0.755925	-0.403684
	ADAMTS16	1.32288	1	0.755925	-0.403684
	ALG10B	1.32288	1	0.755925	-0.403684
	BRD3	1.32288	1	0.755925	-0.403684
	CHP	1.32288	1	0.755925	-0.403684
	CRYGD	1.32288	1	0.755925	-0.403684
	LOC283247	1.32288	1	0.755925	-0.403684
	RPS3	1.32288	1	0.755925	-0.403684
	C20orf158	1.32288	1	0.755925	-0.403684
	SFT2D2	1.32288	1	0.755925	-0.403684
	BTNL9	1.32288	1	0.755925	-0.403684
	RARRES2	1.32288	1	0.755925	-0.403684
	LYPD4	1.32648	1	0.753873	-0.407607
	TLL2	1.33369	1	0.749801	-0.415421
	CTRC	1.33369	1	0.749801	-0.415421
	LOC440905	1.33369	1	0.749801	-0.415421
	RHOJ	1.33369	1	0.749801	-0.415421
	TOMM40	1.33512	1	0.748996	-0.41697
	PIK3C2B	1.33665	1	0.748137	-0.418625
	LOC400943	1.34014	1	0.746193	-0.422379
	CHKB	1.34014	1	0.746193	-0.422379
	RETSAT	1.34014	1	0.746193	-0.422379
	CDK1	1.34014	1	0.746193	-0.422379
	MARVELD2	1.34014	1	0.746193	-0.422379
	ARHGEF2	1.34014	1	0.746193	-0.422379
	GAGE13	1.34014	1	0.746193	-0.422379
	FTHL17	1.34014	1	0.746193	-0.422379
	HDAC10	1.34178	1	0.74528	-0.424146
	PRELID2	1.34682	1	0.742488	-0.42956
	DNAJC22	1.34753	1	0.742099	-0.430317
	HHIPL1	1.34815	1	0.741759	-0.430977
	CCDC57	1.34979	1	0.740857	-0.432734
	PITX3	1.34979	1	0.740857	-0.432734
	CPD	1.34979	1	0.740857	-0.432734
	PLB1	1.34979	1	0.740857	-0.432734
	TMEM191A	1.34979	1	0.740857	-0.432734
	SHE	1.34979	1	0.740857	-0.432734
	CCDC157	1.34979	1	0.740857	-0.432734
	PAGE2B	1.35041	1	0.740518	-0.433392
	POLR3E	1.35258	1	0.739326	-0.435718
	C15orf53	1.35258	1	0.739326	-0.435718
	GOLGA7B	1.35339	1	0.738885	-0.436578
	ADAM15	1.35473	1	0.738153	-0.438009
	ZYG11A	1.35832	1	0.736206	-0.441819
	C10orf88	1.35903	1	0.735818	-0.442579
	PHOX2A	1.37076	1	0.72952	-0.45498
	FTSJD1	1.37076	1	0.72952	-0.45498
	FLJ35816	1.37076	1	0.72952	-0.45498
	LTC4S	1.37076	1	0.72952	-0.45498
	LOC440897	1.37076	1	0.72952	-0.45498
	C19orf39	1.37076	1	0.72952	-0.45498
	CYP2A6	1.37076	1	0.72952	-0.45498
	SPO11	1.37076	1	0.72952	-0.45498
	KCTD15	1.37076	1	0.72952	-0.45498
	ADAMTS14	1.37076	1	0.72952	-0.45498
	NUDT16P1	1.37076	1	0.72952	-0.45498
	ZNF702P	1.37076	1	0.72952	-0.45498
	ADH1C	1.37076	1	0.72952	-0.45498
	CER1	1.37076	1	0.72952	-0.45498
	C22orf42	1.37076	1	0.72952	-0.45498
	DUX1	1.37076	1	0.72952	-0.45498
	NOX4	1.37076	1	0.72952	-0.45498
	SYDE1	1.37076	1	0.72952	-0.45498
	KIR2DL1	1.37076	1	0.72952	-0.45498
	C21orf129	1.37076	1	0.72952	-0.45498
	ANAPC10	1.37076	1	0.72952	-0.45498
	GPCPD1	1.37076	1	0.72952	-0.45498
	RPP14	1.37076	1	0.72952	-0.45498
	CHTF8	1.37076	1	0.72952	-0.45498
	KLK11	1.37148	1	0.729139	-0.455734
	LRRC19	1.37291	1	0.728378	-0.457241
	LOC285766	1.37363	1	0.727998	-0.457993
	C11orf88	1.37373	1	0.727945	-0.458098
	GPX7	1.37373	1	0.727945	-0.458098
	PLIN5	1.37435	1	0.727619	-0.458745
	AMDHD2	1.37506	1	0.72724	-0.459497
	KRTAP4-12	1.3767	1	0.726377	-0.46121
	OPLAH	1.3767	1	0.726377	-0.46121
	ANGPTL2	1.3767	1	0.726377	-0.46121
	MASTL	1.3767	1	0.726377	-0.46121
	HIST1H4I	1.3767	1	0.726377	-0.46121
	ACSBG2	1.3767	1	0.726377	-0.46121
	NLRP13	1.3767	1	0.726377	-0.46121
	C15orf54	1.3767	1	0.726377	-0.46121
	C18orf32	1.3767	1	0.726377	-0.46121
	RELN	1.3767	1	0.726377	-0.46121
	DPEP1	1.3767	1	0.726377	-0.46121
	LOC389727	1.3767	1	0.726377	-0.46121
	TMEM91	1.3767	1	0.726377	-0.46121
	MDS1	1.3767	1	0.726377	-0.46121
	SKA2	1.3767	1	0.726377	-0.46121
	SLC22A24	1.3767	1	0.726377	-0.46121
	HS2ST1	1.3767	1	0.726377	-0.46121
	SLC7A8	1.3767	1	0.726377	-0.46121
	ARHGEF9	1.3767	1	0.726377	-0.46121
	C5orf51	1.3767	1	0.726377	-0.46121
	APLF	1.3767	1	0.726377	-0.46121
	CACNA2D1	1.3767	1	0.726377	-0.46121
	MEOX1	1.3767	1	0.726377	-0.46121
	DEFB119	1.37793	1	0.725727	-0.462501
	PLA2G2A	1.37793	1	0.725727	-0.462501
	GDI1	1.37793	1	0.725727	-0.462501
	RPGR	1.37793	1	0.725727	-0.462501
	RTN2	1.37793	1	0.725727	-0.462501
	WASH2P	1.37793	1	0.725727	-0.462501
	LOC441803	1.37793	1	0.725727	-0.462501
	CSTF2T	1.37793	1	0.725727	-0.462501
	GARNL3	1.37793	1	0.725727	-0.462501
	EGFLAM	1.37957	1	0.724863	-0.46422
	TTLL4	1.38687	1	0.721051	-0.471828
	JMJD1C	1.39046	1	0.719188	-0.475559
	NCRNA00175	1.39047	1	0.719183	-0.47557
	PDLIM3	1.39333	1	0.717704	-0.47854
	ARHGEF37	1.39559	1	0.716542	-0.480877
	FLJ35220	1.4036	1	0.712452	-0.489134
	PARK7	1.4036	1	0.712452	-0.489134
	SLC46A3	1.4036	1	0.712452	-0.489134
	SMPX	1.4036	1	0.712452	-0.489134
	WHSC1L1	1.40424	1	0.71213	-0.489788
	FSD1L	1.40784	1	0.710308	-0.493484
	C8orf16	1.40784	1	0.710308	-0.493484
	CNGA3	1.40784	1	0.710308	-0.493484
	RYR3	1.40784	1	0.710308	-0.493484
	CPA6	1.40784	1	0.710308	-0.493484
	DLGAP1	1.40935	1	0.709545	-0.495034
	APOC1	1.41286	1	0.707786	-0.498614
	PHF20L1	1.41572	1	0.706354	-0.501537
	FAM92B	1.41572	1	0.706354	-0.501537
	PDE4DIP	1.41572	1	0.706354	-0.501537
	AKAP3	1.41572	1	0.706354	-0.501537
	ZNF761	1.41572	1	0.706354	-0.501537
	LOC440054	1.41572	1	0.706354	-0.501537
	RHAG	1.41572	1	0.706354	-0.501537
	C2orf64	1.41572	1	0.706354	-0.501537
	GPC2	1.42024	1	0.704107	-0.506134
	C5orf39	1.42098	1	0.703742	-0.506882
	CDHR4	1.42098	1	0.703742	-0.506882
	LY6H	1.42394	1	0.702276	-0.50989
	CD3EAP	1.42599	1	0.701267	-0.511965
	LOC285696	1.42745	1	0.700548	-0.513444
	ATP5L	1.42825	1	0.700158	-0.514249
	CCKAR	1.43051	1	0.699052	-0.516529
	GJB7	1.43051	1	0.699052	-0.516529
	HMCN1	1.43051	1	0.699052	-0.516529
	LRP1B	1.43051	1	0.699052	-0.516529
	KCNK5	1.43051	1	0.699052	-0.516529
	RYR2	1.43051	1	0.699052	-0.516529
	TBC1D7	1.43051	1	0.699052	-0.516529
	PIGF	1.43051	1	0.699052	-0.516529
	GCK	1.43051	1	0.699052	-0.516529
	SYN1	1.43051	1	0.699052	-0.516529
	C15orf38	1.43051	1	0.699052	-0.516529
	WSCD1	1.43051	1	0.699052	-0.516529
	TAS2R31	1.43051	1	0.699052	-0.516529
	DRAM2	1.43051	1	0.699052	-0.516529
	ADNP	1.43051	1	0.699052	-0.516529
	ZNF333	1.43051	1	0.699052	-0.516529
	ZMAT4	1.43051	1	0.699052	-0.516529
	FAM116A	1.43051	1	0.699052	-0.516529
	ZNF300	1.43051	1	0.699052	-0.516529
	C2orf56	1.43051	1	0.699052	-0.516529
	MMP19	1.43051	1	0.699052	-0.516529
	SOSTDC1	1.43051	1	0.699052	-0.516529
	GPNMB	1.43051	1	0.699052	-0.516529
	HCN3	1.43051	1	0.699052	-0.516529
	CDC42EP2	1.43051	1	0.699052	-0.516529
	GUCY1A3	1.43051	1	0.699052	-0.516529
	PRKAG3	1.43104	1	0.698795	-0.517059
	VASH2	1.43411	1	0.697296	-0.520157
	FLJ25328	1.43462	1	0.69705	-0.520666
	RANBP3L	1.43462	1	0.69705	-0.520666
	HIST3H2BB	1.4414	1	0.693772	-0.527466
	MED16	1.44428	1	0.692386	-0.530351
	LRRC25	1.44492	1	0.692081	-0.530986
	GVINP1	1.44492	1	0.692081	-0.530986
	AGTR1	1.44492	1	0.692081	-0.530986
	CA13	1.44492	1	0.692081	-0.530986
	ZNF747	1.44492	1	0.692081	-0.530986
	BAD	1.44492	1	0.692081	-0.530986
	PCDHGA4	1.44492	1	0.692081	-0.530986
	GP1BB	1.44492	1	0.692081	-0.530986
	CENPQ	1.44492	1	0.692081	-0.530986
	MAGEA5	1.44492	1	0.692081	-0.530986
	PGM5	1.44492	1	0.692081	-0.530986
	LOC340765	1.44492	1	0.692081	-0.530986
	ACD	1.44492	1	0.692081	-0.530986
	TPTEps1	1.44492	1	0.692081	-0.530986
	FLJ45966	1.44492	1	0.692081	-0.530986
	TMEM225	1.44492	1	0.692081	-0.530986
	SLC7A4	1.44492	1	0.692081	-0.530986
	ALDH5A1	1.44492	1	0.692081	-0.530986
	TUBA4A	1.44492	1	0.692081	-0.530986
	C19orf54	1.44492	1	0.692081	-0.530986
	SH3GLB1	1.44492	1	0.692081	-0.530986
	EFCAB8	1.44492	1	0.692081	-0.530986
	EFCAB6	1.44492	1	0.692081	-0.530986
	SLC5A9	1.44492	1	0.692081	-0.530986
	MTHFD2L	1.44492	1	0.692081	-0.530986
	PXDNL	1.44492	1	0.692081	-0.530986
	LOC128192	1.44492	1	0.692081	-0.530986
	LOC149950	1.44492	1	0.692081	-0.530986
	FLNA	1.44778	1	0.690711	-0.533845
	PCDHB1	1.44788	1	0.690664	-0.533945
	CHI3L1	1.44788	1	0.690664	-0.533945
	SP1	1.4529	1	0.68828	-0.538933
	ANKRD45	1.45351	1	0.687988	-0.539545
	RECQL5	1.45351	1	0.687988	-0.539545
	DRD4	1.45351	1	0.687988	-0.539545
	TTLL3	1.45351	1	0.687988	-0.539545
	TP53I3	1.45351	1	0.687988	-0.539545
	UGT1A9	1.45742	1	0.686146	-0.543413
	ZC3HAV1	1.45742	1	0.686146	-0.543413
	LOC55908	1.45742	1	0.686146	-0.543413
	ATP5SL	1.45742	1	0.686146	-0.543413
	MT2A	1.45742	1	0.686146	-0.543413
	RGL2	1.45805	1	0.685847	-0.544042
	SLAMF1	1.45805	1	0.685847	-0.544042
	UTP23	1.45865	1	0.685566	-0.544633
	FAM26F	1.46102	1	0.684454	-0.546974
	FLJ37035	1.46102	1	0.684454	-0.546974
	LOC283874	1.46381	1	0.683147	-0.549731
	ZNF534	1.46668	1	0.681812	-0.552553
	SLC48A1	1.4674	1	0.68148	-0.553258
	FCGR2C	1.46811	1	0.681147	-0.553962
	CASC4	1.47241	1	0.679158	-0.55818
	CNPY4	1.47241	1	0.679158	-0.55818
	PARP6	1.47479	1	0.678063	-0.560509
	PARP15	1.48042	1	0.675484	-0.566007
	GUCY2C	1.48136	1	0.675057	-0.566919
	MAP6D1	1.48199	1	0.674767	-0.567539
	SLC22A17	1.48199	1	0.674767	-0.567539
	CCR8	1.48268	1	0.674454	-0.568207
	ODF4	1.48271	1	0.674441	-0.568236
	LOC442368	1.48432	1	0.673708	-0.569805
	CLEC4F	1.48432	1	0.673708	-0.569805
	AIM1L	1.48432	1	0.673708	-0.569805
	PRRT3	1.48432	1	0.673708	-0.569805
	ADRB2	1.48432	1	0.673708	-0.569805
	KIAA0090	1.48432	1	0.673708	-0.569805
	LRRC52	1.48432	1	0.673708	-0.569805
	LRRC37B	1.48432	1	0.673708	-0.569805
	NOMO1	1.48432	1	0.673708	-0.569805
	PLCH2	1.48432	1	0.673708	-0.569805
	PLCXD3	1.48432	1	0.673708	-0.569805
	PRTN3	1.48432	1	0.673708	-0.569805
	TMEM97	1.48432	1	0.673708	-0.569805
	CLEC5A	1.48432	1	0.673708	-0.569805
	H2AFX	1.48432	1	0.673708	-0.569805
	CLYBL	1.48432	1	0.673708	-0.569805
	LMAN1	1.48432	1	0.673708	-0.569805
	MKS1	1.48432	1	0.673708	-0.569805
	CAPN12	1.48432	1	0.673708	-0.569805
	YBEY	1.48432	1	0.673708	-0.569805
	MOBP	1.48432	1	0.673708	-0.569805
	OR14A16	1.48432	1	0.673708	-0.569805
	SYCP1	1.48432	1	0.673708	-0.569805
	MDGA1	1.48432	1	0.673708	-0.569805
	ENTHD1	1.48432	1	0.673708	-0.569805
	DUSP23	1.48432	1	0.673708	-0.569805
	FAM82A1	1.48432	1	0.673708	-0.569805
	PSMC4	1.48432	1	0.673708	-0.569805
	NOXA1	1.48558	1	0.67314	-0.571022
	SLC25A14	1.48701	1	0.672491	-0.572413
	RAB23	1.48856	1	0.67179	-0.573918
	SPECC1L	1.49131	1	0.670553	-0.576577
	C1QTNF8	1.49131	1	0.670553	-0.576577
	POLD4	1.49131	1	0.670553	-0.576577
	LOC392145	1.49131	1	0.670553	-0.576577
	ADAM30	1.49131	1	0.670553	-0.576577
	HIST1H4L	1.49131	1	0.670553	-0.576577
	MAX	1.49131	1	0.670553	-0.576577
	NRXN3	1.49131	1	0.670553	-0.576577
	DEFB129	1.49131	1	0.670553	-0.576577
	ANKRD43	1.49131	1	0.670553	-0.576577
	SERPINA10	1.49513	1	0.668839	-0.58027
	MICALCL	1.49513	1	0.668839	-0.58027
	MMP28	1.49583	1	0.668527	-0.580942
	LOC402095	1.50089	1	0.666272	-0.585818
	STAM	1.50089	1	0.666272	-0.585818
	EFEMP2	1.50519	1	0.664369	-0.589944
	GPR153	1.50609	1	0.663969	-0.590813
	IDO2	1.50959	1	0.662433	-0.594154
	ATF7IP2	1.50959	1	0.662433	-0.594154
	KLC2	1.5102	1	0.662162	-0.594743
	RCBTB2	1.5102	1	0.662162	-0.594743
	SERPINI1	1.51123	1	0.661713	-0.595723
	SERPINB2	1.51123	1	0.661713	-0.595723
	DPPA2	1.51123	1	0.661713	-0.595723
	FBL	1.51123	1	0.661713	-0.595723
	PRPF4	1.51123	1	0.661713	-0.595723
	TDG	1.51123	1	0.661713	-0.595723
	NOX5	1.51907	1	0.658298	-0.603188
	FNDC5	1.51907	1	0.658298	-0.603188
	LOC390031	1.51907	1	0.658298	-0.603188
	PAPL	1.51907	1	0.658298	-0.603188
	SH2D3A	1.51907	1	0.658298	-0.603188
	RNF17	1.51907	1	0.658298	-0.603188
	AGMO	1.51907	1	0.658298	-0.603188
	LOC283398	1.51907	1	0.658298	-0.603188
	PARN	1.51907	1	0.658298	-0.603188
	MS4A14	1.51907	1	0.658298	-0.603188
	CCT8	1.51907	1	0.658298	-0.603188
	FOXK1	1.51907	1	0.658298	-0.603188
	LOC402687	1.51907	1	0.658298	-0.603188
	PLXNA2	1.51907	1	0.658298	-0.603188
	EBF2	1.51907	1	0.658298	-0.603188
	TP53TG1	1.51907	1	0.658298	-0.603188
	ATP2C2	1.51907	1	0.658298	-0.603188
	SLC12A9	1.51907	1	0.658298	-0.603188
	LRRC4	1.51907	1	0.658298	-0.603188
	CA11	1.51907	1	0.658298	-0.603188
	KCNA5	1.51907	1	0.658298	-0.603188
	FSTL5	1.51907	1	0.658298	-0.603188
	KLRD1	1.51907	1	0.658298	-0.603188
	JAK3	1.51907	1	0.658298	-0.603188
	LDB3	1.51907	1	0.658298	-0.603188
	PHAX	1.51907	1	0.658298	-0.603188
	ASAH2	1.51907	1	0.658298	-0.603188
	FLG2	1.51907	1	0.658298	-0.603188
	BPY2C	1.5214	1	0.65729	-0.605399
	ACER2	1.52695	1	0.6549	-0.610653
	OPN4	1.5286	1	0.654192	-0.612214
	GFRA2	1.5291	1	0.65398	-0.612683
	MMP20	1.5291	1	0.65398	-0.612683
	WDR60	1.5291	1	0.65398	-0.612683
	MKI67IP	1.5291	1	0.65398	-0.612683
	RPL4	1.5291	1	0.65398	-0.612683
	TDRD4	1.5291	1	0.65398	-0.612683
	LOC143506	1.5291	1	0.65398	-0.612683
	DGKB	1.5291	1	0.65398	-0.612683
	FBXO36	1.5291	1	0.65398	-0.612683
	DMPK	1.5291	1	0.65398	-0.612683
	AFMID	1.5291	1	0.65398	-0.612683
	KIAA0562	1.5291	1	0.65398	-0.612683
	TMEM205	1.5291	1	0.65398	-0.612683
	SP2	1.5291	1	0.65398	-0.612683
	CEP78	1.5291	1	0.65398	-0.612683
	AZI1	1.53517	1	0.651393	-0.618399
	PRKAA1	1.53517	1	0.651393	-0.618399
	TBC1D3D	1.53581	1	0.651124	-0.618997
	PM20D1	1.53814	1	0.650137	-0.621184
	EID2B	1.53814	1	0.650137	-0.621184
	SERPINB8	1.53814	1	0.650137	-0.621184
	CAMKK2	1.53814	1	0.650137	-0.621184
	CES1P2	1.53814	1	0.650137	-0.621184
	OR2L13	1.53814	1	0.650137	-0.621184
	GSX1	1.53814	1	0.650137	-0.621184
	GPX6	1.53814	1	0.650137	-0.621184
	HK3	1.53814	1	0.650137	-0.621184
	NEUROG2	1.53814	1	0.650137	-0.621184
	SMEK2	1.53814	1	0.650137	-0.621184
	PDE9A	1.53814	1	0.650137	-0.621184
	C20orf46	1.53814	1	0.650137	-0.621184
	SRRM2	1.53814	1	0.650137	-0.621184
	KCNC3	1.53814	1	0.650137	-0.621184
	KBTBD5	1.53814	1	0.650137	-0.621184
	STAG3L2	1.53814	1	0.650137	-0.621184
	LCNL1	1.53814	1	0.650137	-0.621184
	MCF2L	1.53814	1	0.650137	-0.621184
	HAND1	1.53814	1	0.650137	-0.621184
	FUNDC2P2	1.53814	1	0.650137	-0.621184
	SLC7A7	1.53814	1	0.650137	-0.621184
	OR5W2	1.53814	1	0.650137	-0.621184
	THUMPD1	1.53814	1	0.650137	-0.621184
	VNN3	1.53814	1	0.650137	-0.621184
	SLC8A3	1.53814	1	0.650137	-0.621184
	DCBLD2	1.53814	1	0.650137	-0.621184
	NRSN2	1.53814	1	0.650137	-0.621184
	PPP6R2	1.53877	1	0.649869	-0.62178
	BEX5	1.54163	1	0.648665	-0.624455
	DDX55	1.54163	1	0.648665	-0.624455
	PKD1	1.54174	1	0.648618	-0.624558
	MS4A1	1.54226	1	0.648397	-0.62505
	CLIP4	1.54534	1	0.647107	-0.627925
	CCDC138	1.548	1	0.645996	-0.630402
	LOC84856	1.548	1	0.645996	-0.630402
	GNPDA1	1.55615	1	0.642613	-0.637977
	HDHD1	1.55615	1	0.642613	-0.637977
	PIGY	1.55615	1	0.642613	-0.637977
	FAM83F	1.55615	1	0.642613	-0.637977
	ANKRD23	1.55615	1	0.642613	-0.637977
	GAGE2A	1.55615	1	0.642613	-0.637977
	MRPL14	1.55765	1	0.641993	-0.639371
	FLJ45445	1.55848	1	0.641653	-0.640136
	LOC442362	1.55911	1	0.641391	-0.640724
	DNHL1	1.56504	1	0.63896	-0.646203
	HAP1	1.56504	1	0.63896	-0.646203
	CD163L1	1.56504	1	0.63896	-0.646203
	RASL11A	1.56504	1	0.63896	-0.646203
	FHOD1	1.56568	1	0.6387	-0.646789
	TLE4	1.56689	1	0.638206	-0.647906
	PDE11A	1.56689	1	0.638206	-0.647906
	FEZF1	1.56689	1	0.638206	-0.647906
	ACER1	1.56689	1	0.638206	-0.647906
	DHRS12	1.56689	1	0.638206	-0.647906
	TMCC3	1.56689	1	0.638206	-0.647906
	TSR2	1.56689	1	0.638206	-0.647906
	FAM124A	1.56865	1	0.637493	-0.649519
	LOC392850	1.57504	1	0.634904	-0.655391
	SBSN	1.58242	1	0.631945	-0.66213
	HSPG2	1.58305	1	0.631691	-0.662709
	C17orf91	1.58579	1	0.630601	-0.665201
	C1orf127	1.59195	1	0.62816	-0.670795
	HIST3H2A	1.59195	1	0.62816	-0.670795
	LOC348840	1.59195	1	0.62816	-0.670795
	CHODL	1.59195	1	0.62816	-0.670795
	MRPL36	1.59195	1	0.62816	-0.670795
	PIP5KL1	1.59195	1	0.62816	-0.670795
	TMEM98	1.59195	1	0.62816	-0.670795
	CDC45	1.59195	1	0.62816	-0.670795
	TEX28	1.59195	1	0.62816	-0.670795
	PLCXD2	1.59195	1	0.62816	-0.670795
	NUP133	1.59195	1	0.62816	-0.670795
	HIST1H2BI	1.59195	1	0.62816	-0.670795
	LOC442350	1.59195	1	0.62816	-0.670795
	CCR5	1.59195	1	0.62816	-0.670795
	OR1D4	1.59195	1	0.62816	-0.670795
	LOC201651	1.59195	1	0.62816	-0.670795
	ST8SIA1	1.59195	1	0.62816	-0.670795
	RPS4X	1.59195	1	0.62816	-0.670795
	CRY2	1.59195	1	0.62816	-0.670795
	ZFAND5	1.59195	1	0.62816	-0.670795
	FSD1CL	1.59195	1	0.62816	-0.670795
	C12orf67	1.59195	1	0.62816	-0.670795
	FLJ46838	1.59195	1	0.62816	-0.670795
	ARMCX2	1.59195	1	0.62816	-0.670795
	FLJ43879	1.59195	1	0.62816	-0.670795
	APEX2	1.59195	1	0.62816	-0.670795
	RRAD	1.59195	1	0.62816	-0.670795
	FAM86A	1.59195	1	0.62816	-0.670795
	C16orf54	1.59195	1	0.62816	-0.670795
	LOC100132247	1.59195	1	0.62816	-0.670795
	EPB49	1.59195	1	0.62816	-0.670795
	STON2	1.59195	1	0.62816	-0.670795
	RILPL1	1.59195	1	0.62816	-0.670795
	MED11	1.59195	1	0.62816	-0.670795
	FAM203A	1.59195	1	0.62816	-0.670795
	NVL	1.59322	1	0.627659	-0.671948
	MBOAT1	1.59322	1	0.627659	-0.671948
	MSLNL	1.59322	1	0.627659	-0.671948
	HPD	1.59322	1	0.627659	-0.671948
	LRRC9	1.59322	1	0.627659	-0.671948
	SIPA1L2	1.59322	1	0.627659	-0.671948
	LOC401398	1.59322	1	0.627659	-0.671948
	C11orf57	1.59322	1	0.627659	-0.671948
	SIAH1P1	1.59322	1	0.627659	-0.671948
	AQP12B	1.59322	1	0.627659	-0.671948
	FUT4	1.59322	1	0.627659	-0.671948
	SNX31	1.59322	1	0.627659	-0.671948
	PDPK2	1.59322	1	0.627659	-0.671948
	SLC34A3	1.59322	1	0.627659	-0.671948
	PIH1D1	1.59322	1	0.627659	-0.671948
	LOC388642	1.59322	1	0.627659	-0.671948
	ST14	1.59322	1	0.627659	-0.671948
	C5orf27	1.59322	1	0.627659	-0.671948
	S100A3	1.59322	1	0.627659	-0.671948
	PON2	1.59322	1	0.627659	-0.671948
	STX10	1.59322	1	0.627659	-0.671948
	RPL18A	1.59322	1	0.627659	-0.671948
	PRSS12	1.59322	1	0.627659	-0.671948
	ASB6	1.59322	1	0.627659	-0.671948
	MIXL1	1.59322	1	0.627659	-0.671948
	CLN8	1.59322	1	0.627659	-0.671948
	C6orf201	1.59322	1	0.627659	-0.671948
	FLJ46026	1.59322	1	0.627659	-0.671948
	BOLA2	1.59322	1	0.627659	-0.671948
	EBPL	1.59322	1	0.627659	-0.671948
	ZNF322B	1.59322	1	0.627659	-0.671948
	C10orf27	1.59322	1	0.627659	-0.671948
	DPY19L2P2	1.59322	1	0.627659	-0.671948
	TMEM198	1.60345	1	0.623654	-0.681182
	PRKRA	1.60469	1	0.623175	-0.682291
	HOXD4	1.60469	1	0.623175	-0.682291
	CHCHD2P10	1.60572	1	0.622773	-0.683222
	TUBB3	1.60636	1	0.622526	-0.683793
	MN1	1.60932	1	0.621379	-0.686454
	HECA	1.61085	1	0.620792	-0.687819
	CLMP	1.61589	1	0.618854	-0.69233
	ABHD8	1.6166	1	0.618583	-0.692961
	HDAC3	1.61886	1	0.61772	-0.694976
	HEATR7B2	1.61886	1	0.61772	-0.694976
	PNPLA6	1.61886	1	0.61772	-0.694976
	AMBN	1.61886	1	0.61772	-0.694976
	MYH3	1.61886	1	0.61772	-0.694976
	C10orf82	1.61949	1	0.617477	-0.695542
	PREPL	1.62235	1	0.61639	-0.698084
	SGOL1	1.6231	1	0.616107	-0.698747
	MANBAL	1.62358	1	0.615922	-0.69918
	IYD	1.62522	1	0.6153	-0.700639
	SERPINA7	1.62522	1	0.6153	-0.700639
	PEBP4	1.62903	1	0.613864	-0.70401
	LPL	1.6303	1	0.613385	-0.705136
	PIBF1	1.6303	1	0.613385	-0.705136
	LOC400965	1.6303	1	0.613385	-0.705136
	CDCA4	1.6303	1	0.613385	-0.705136
	HPX	1.6303	1	0.613385	-0.705136
	PNOC	1.6303	1	0.613385	-0.705136
	FLJ32063	1.6303	1	0.613385	-0.705136
	KDM1B	1.6303	1	0.613385	-0.705136
	PPRC1	1.6303	1	0.613385	-0.705136
	SERPINB10	1.63245	1	0.612577	-0.707037
	GPR119	1.63263	1	0.612509	-0.707197
	TUBA3C	1.63324	1	0.612282	-0.707732
	NSUN5P2	1.63326	1	0.612271	-0.707759
	ZNF714	1.64176	1	0.609102	-0.715245
	PPP2R3A	1.64248	1	0.608836	-0.715874
	PLCD3	1.64248	1	0.608836	-0.715874
	EEF1DP3	1.64248	1	0.608836	-0.715874
	C9orf66	1.64248	1	0.608836	-0.715874
	PLA2G5	1.64248	1	0.608836	-0.715874
	LOC645691	1.64248	1	0.608836	-0.715874
	SCFD2	1.64248	1	0.608836	-0.715874
	SLC16A5	1.64248	1	0.608836	-0.715874
	ZNF552	1.6428	1	0.608718	-0.716155
	TMEM63B	1.64343	1	0.608482	-0.716714
	RPL7A	1.64412	1	0.608228	-0.717317
	ANAPC1	1.64576	1	0.607621	-0.718757
	C17orf62	1.64576	1	0.607621	-0.718757
	FSD2	1.64576	1	0.607621	-0.718757
	GAGE5	1.64576	1	0.607621	-0.718757
	ZNF99	1.64576	1	0.607621	-0.718757
	SPDYA	1.64576	1	0.607621	-0.718757
	CLLU1OS	1.64576	1	0.607621	-0.718757
	DDX52	1.64576	1	0.607621	-0.718757
	EIF3D	1.64576	1	0.607621	-0.718757
	CLEC3A	1.64576	1	0.607621	-0.718757
	ADAMTS3	1.64576	1	0.607621	-0.718757
	CYP2W1	1.64576	1	0.607621	-0.718757
	RPA4	1.64576	1	0.607621	-0.718757
	GAPDH	1.64576	1	0.607621	-0.718757
	MT1A	1.64576	1	0.607621	-0.718757
	LOC346521	1.64576	1	0.607621	-0.718757
	DKFZp761E198	1.64576	1	0.607621	-0.718757
	DOK6	1.64576	1	0.607621	-0.718757
	CTXN2	1.64576	1	0.607621	-0.718757
	CT47A10	1.64576	1	0.607621	-0.718757
	C20orf200	1.64576	1	0.607621	-0.718757
	CCBP2	1.64576	1	0.607621	-0.718757
	PRRT1	1.64576	1	0.607621	-0.718757
	KRTAP26-1	1.64576	1	0.607621	-0.718757
	ATP8B4	1.64576	1	0.607621	-0.718757
	PAQR8	1.64576	1	0.607621	-0.718757
	KRT6B	1.64576	1	0.607621	-0.718757
	C14orf79	1.64576	1	0.607621	-0.718757
	NKIRAS2	1.64576	1	0.607621	-0.718757
	ANKRD6	1.64576	1	0.607621	-0.718757
	ZBTB8	1.64576	1	0.607621	-0.718757
	PAPD5	1.64576	1	0.607621	-0.718757
	FLJ13962	1.64576	1	0.607621	-0.718757
	LOC402295	1.64576	1	0.607621	-0.718757
	BTN3A1	1.64576	1	0.607621	-0.718757
	ACY3	1.64576	1	0.607621	-0.718757
	CDCP1	1.64576	1	0.607621	-0.718757
	PHLDA2	1.64576	1	0.607621	-0.718757
	HERC6	1.64576	1	0.607621	-0.718757
	HEPACAM	1.64576	1	0.607621	-0.718757
	TMEM17	1.64576	1	0.607621	-0.718757
	GPX2	1.64576	1	0.607621	-0.718757
	PCDHB14	1.64576	1	0.607621	-0.718757
	LOC93432	1.64576	1	0.607621	-0.718757
	POPDC2	1.64576	1	0.607621	-0.718757
	SNIP1	1.65297	1	0.604973	-0.725058
	CALCB	1.65297	1	0.604973	-0.725058
	PTPN20B	1.65349	1	0.60478	-0.725518
	OTX2	1.65421	1	0.604518	-0.726143
	S100A2	1.65439	1	0.604452	-0.7263
	NUDT2	1.66017	1	0.602347	-0.731332
	SNRPG	1.66017	1	0.602347	-0.731332
	SERPINB7	1.66466	1	0.600723	-0.735228
	RPS18	1.66738	1	0.599745	-0.737579
	PDC	1.66738	1	0.599745	-0.737579
	NACAD	1.66738	1	0.599745	-0.737579
	COQ6	1.66738	1	0.599745	-0.737579
	GPKOW	1.66738	1	0.599745	-0.737579
	HACL1	1.66738	1	0.599745	-0.737579
	OR56A4	1.66738	1	0.599745	-0.737579
	RPS5	1.66738	1	0.599745	-0.737579
	SLCO6A1	1.66738	1	0.599745	-0.737579
	MAN1A1	1.66738	1	0.599745	-0.737579
	LOC377602	1.66738	1	0.599745	-0.737579
	ACOT9	1.66738	1	0.599745	-0.737579
	THBS3	1.66738	1	0.599745	-0.737579
	PXT1	1.66738	1	0.599745	-0.737579
	ARX	1.66738	1	0.599745	-0.737579
	SLC5A2	1.66738	1	0.599745	-0.737579
	TPPP3	1.66738	1	0.599745	-0.737579
	ATG9B	1.66738	1	0.599745	-0.737579
	SDC1	1.66738	1	0.599745	-0.737579
	FAM81B	1.66738	1	0.599745	-0.737579
	MASP1	1.66738	1	0.599745	-0.737579
	DUT	1.66738	1	0.599745	-0.737579
	C1orf172	1.66738	1	0.599745	-0.737579
	FITM1	1.66738	1	0.599745	-0.737579
	CES3	1.66738	1	0.599745	-0.737579
	FLJ41423	1.66754	1	0.599687	-0.737718
	VN1R5	1.67024	1	0.598716	-0.740056
	CYP2C19	1.67034	1	0.59868	-0.740143
	SLC38A5	1.67239	1	0.597947	-0.741912
	MED9	1.67267	1	0.597846	-0.742153
	SGCA	1.67267	1	0.597846	-0.742153
	MUC20	1.67267	1	0.597846	-0.742153
	CDR1	1.67267	1	0.597846	-0.742153
	ANKRD19	1.67267	1	0.597846	-0.742153
	MAP4K2	1.67267	1	0.597846	-0.742153
	ODF3L1	1.67267	1	0.597846	-0.742153
	LYPD6B	1.67267	1	0.597846	-0.742153
	IGSF10	1.67267	1	0.597846	-0.742153
	C1orf192	1.67331	1	0.597619	-0.742702
	PPP6R3	1.67331	1	0.597619	-0.742702
	LOC402644	1.67454	1	0.597179	-0.743765
	PTMS	1.67526	1	0.596924	-0.744382
	RABIF	1.67987	1	0.595283	-0.748353
	EYA2	1.68027	1	0.595142	-0.748694
	LHFP	1.68027	1	0.595142	-0.748694
	C1orf106	1.68027	1	0.595142	-0.748694
	ANGPTL3	1.68027	1	0.595142	-0.748694
	CAPSL	1.68027	1	0.595142	-0.748694
	SLC25A41	1.68027	1	0.595142	-0.748694
	MURC	1.68027	1	0.595142	-0.748694
	HES2	1.68027	1	0.595142	-0.748694
	AQP5	1.68027	1	0.595142	-0.748694
	XPNPEP2	1.68027	1	0.595142	-0.748694
	LOC441333	1.68027	1	0.595142	-0.748694
	POLR2J3	1.68027	1	0.595142	-0.748694
	C20orf71	1.68027	1	0.595142	-0.748694
	GAPT	1.68027	1	0.595142	-0.748694
	DLEU7	1.68348	1	0.594009	-0.751443
	C9orf30	1.68627	1	0.593024	-0.753837
	MCM10	1.68627	1	0.593024	-0.753837
	SGSH	1.68627	1	0.593024	-0.753837
	LRRC18	1.6877	1	0.592521	-0.755062
	GPX5	1.6877	1	0.592521	-0.755062
	PRKCZ	1.6877	1	0.592521	-0.755062
	RNASE2	1.68931	1	0.591958	-0.756432
	CDK4	1.69004	1	0.591701	-0.757061
	SH3D19	1.69004	1	0.591701	-0.757061
	ZNHIT2	1.69004	1	0.591701	-0.757061
	POMT2	1.69057	1	0.591516	-0.75751
	PANX1	1.69272	1	0.590765	-0.759343
	LSM5	1.6928	1	0.590737	-0.759412
	MAPK1IP1L	1.69365	1	0.590442	-0.760132
	HAO1	1.69415	1	0.590266	-0.760564
	ACRV1	1.69568	1	0.589735	-0.76186
	FLJ35934	1.69917	1	0.588523	-0.764828
	C13orf26	1.69917	1	0.588523	-0.764828
	KCTD2	1.69917	1	0.588523	-0.764828
	ZNF468	1.69958	1	0.588382	-0.765176
	C22orf36	1.69958	1	0.588382	-0.765176
	FLJ26850	1.69958	1	0.588382	-0.765176
	ZNF471	1.69958	1	0.588382	-0.765176
	TXNDC16	1.69958	1	0.588382	-0.765176
	ZNF683	1.69958	1	0.588382	-0.765176
	C10orf71	1.69958	1	0.588382	-0.765176
	RAPGEF6	1.69958	1	0.588382	-0.765176
	C14orf156	1.69958	1	0.588382	-0.765176
	SDCCAG8	1.69958	1	0.588382	-0.765176
	FAM49A	1.69958	1	0.588382	-0.765176
	CWC15	1.69958	1	0.588382	-0.765176
	CSHL1	1.69958	1	0.588382	-0.765176
	PLCB2	1.69958	1	0.588382	-0.765176
	TOP3B	1.69958	1	0.588382	-0.765176
	C9orf125	1.69958	1	0.588382	-0.765176
	GLI1	1.69958	1	0.588382	-0.765176
	PCDHB13	1.69958	1	0.588382	-0.765176
	HOMER3	1.69958	1	0.588382	-0.765176
	GIMAP8	1.69958	1	0.588382	-0.765176
	PGAM2	1.69958	1	0.588382	-0.765176
	APOL3	1.69958	1	0.588382	-0.765176
	KRTAP19-3	1.69958	1	0.588382	-0.765176
	SLC8A2	1.69958	1	0.588382	-0.765176
	SRP9	1.69958	1	0.588382	-0.765176
	INSM2	1.69958	1	0.588382	-0.765176
	IRX1	1.69958	1	0.588382	-0.765176
	LOC391580	1.69958	1	0.588382	-0.765176
	CES1	1.69958	1	0.588382	-0.765176
	LOC541469	1.69958	1	0.588382	-0.765176
	LOC388915	1.69958	1	0.588382	-0.765176
	ODAM	1.69958	1	0.588382	-0.765176
	OPA3	1.69958	1	0.588382	-0.765176
	MRC1	1.69958	1	0.588382	-0.765176
	PIPOX	1.69958	1	0.588382	-0.765176
	LOC401897	1.69958	1	0.588382	-0.765176
	JPH4	1.69958	1	0.588382	-0.765176
	PNMA6A	1.69958	1	0.588382	-0.765176
	CPXM1	1.70085	1	0.587941	-0.766256
	COL11A1	1.70445	1	0.586699	-0.769308
	KHDC1	1.70445	1	0.586699	-0.769308
	WNT7A	1.70445	1	0.586699	-0.769308
	TPK1	1.70445	1	0.586699	-0.769308
	PIAS4	1.70595	1	0.586185	-0.770571
	ELFN2	1.70875	1	0.585223	-0.772942
	TTC18	1.71038	1	0.584664	-0.77432
	CYP27C1	1.71399	1	0.583436	-0.777355
	PDE8B	1.71806	1	0.58205	-0.780784
	STOML2	1.71806	1	0.58205	-0.780784
	CHRDL2	1.71806	1	0.58205	-0.780784
	MGC2752	1.71806	1	0.58205	-0.780784
	ACBD4	1.71806	1	0.58205	-0.780784
	GK	1.71992	1	0.581424	-0.782339
	PRR3	1.72032	1	0.581286	-0.78268
	TMEM129	1.72406	1	0.580025	-0.785814
	DNAJA4	1.72415	1	0.579994	-0.785889
	PCSK6	1.72484	1	0.579763	-0.786464
	LRRC31	1.72648	1	0.579212	-0.787837
	FCRL6	1.72648	1	0.579212	-0.787837
	KIAA1984	1.72648	1	0.579212	-0.787837
	C11orf39	1.72648	1	0.579212	-0.787837
	PRSS1	1.72648	1	0.579212	-0.787837
	NCLN	1.72712	1	0.578998	-0.788369
	PGC	1.72836	1	0.578582	-0.789406
	CHCHD8	1.73009	1	0.578006	-0.790844
	ITPRIP	1.73072	1	0.577793	-0.791374
	UBB	1.73121	1	0.577631	-0.79178
	FAM190A	1.73665	1	0.57582	-0.79631
	KRTAP9-3	1.73696	1	0.575718	-0.796565
	MTPAP	1.73799	1	0.575378	-0.797417
	MAN2C1	1.73799	1	0.575378	-0.797417
	C12orf68	1.74089	1	0.574418	-0.799827
	MMP8	1.74089	1	0.574418	-0.799827
	SPINLW1	1.74089	1	0.574418	-0.799827
	ELAC2	1.74153	1	0.574208	-0.800354
	SCRT2	1.74153	1	0.574208	-0.800354
	PDCD2L	1.74153	1	0.574208	-0.800354
	FAM38A	1.74153	1	0.574208	-0.800354
	SPATC1	1.74153	1	0.574208	-0.800354
	UTS2	1.74153	1	0.574208	-0.800354
	FAHD1	1.74153	1	0.574208	-0.800354
	FAM75A3	1.74153	1	0.574208	-0.800354
	ZNF415	1.74153	1	0.574208	-0.800354
	OR2T10	1.74153	1	0.574208	-0.800354
	KLF8	1.74153	1	0.574208	-0.800354
	SMU1	1.74153	1	0.574208	-0.800354
	FOXE3	1.74153	1	0.574208	-0.800354
	LRRTM4	1.74153	1	0.574208	-0.800354
	BIRC5	1.74153	1	0.574208	-0.800354
	CYP7B1	1.74153	1	0.574208	-0.800354
	CYP2D7P1	1.74153	1	0.574208	-0.800354
	WNT9B	1.74153	1	0.574208	-0.800354
	OR51T1	1.74153	1	0.574208	-0.800354
	TRIM67	1.74153	1	0.574208	-0.800354
	PRIC285	1.74153	1	0.574208	-0.800354
	CHAC2	1.74153	1	0.574208	-0.800354
	LOC391360	1.74153	1	0.574208	-0.800354
	LOC440046	1.74153	1	0.574208	-0.800354
	QPCTL	1.74153	1	0.574208	-0.800354
	SEMA3G	1.74153	1	0.574208	-0.800354
	BARX1	1.74153	1	0.574208	-0.800354
	PHLDA3	1.74153	1	0.574208	-0.800354
	CST11	1.74153	1	0.574208	-0.800354
	JAKMIP3	1.74153	1	0.574208	-0.800354
	C2orf71	1.74153	1	0.574208	-0.800354
	C3orf52	1.74153	1	0.574208	-0.800354
	RPL21P16	1.74153	1	0.574208	-0.800354
	LOC442653	1.74153	1	0.574208	-0.800354
	ARHGEF4	1.74153	1	0.574208	-0.800354
	MBNL3	1.74153	1	0.574208	-0.800354
	ADAM18	1.74153	1	0.574208	-0.800354
	HIST2H2BF	1.74153	1	0.574208	-0.800354
	REG1A	1.74583	1	0.572795	-0.80391
	POLA2	1.75106	1	0.571082	-0.80823
	BET1	1.75299	1	0.570454	-0.809819
	BPIL3	1.75339	1	0.570323	-0.810148
	DOLPP1	1.75339	1	0.570323	-0.810148
	SLC9A10	1.75339	1	0.570323	-0.810148
	NHP2L1	1.75339	1	0.570323	-0.810148
	ANKRD40	1.75339	1	0.570323	-0.810148
	RPL18AP4	1.75339	1	0.570323	-0.810148
	PCBP3	1.75339	1	0.570323	-0.810148
	TXNDC12	1.75339	1	0.570323	-0.810148
	MYO1G	1.75339	1	0.570323	-0.810148
	DHX58	1.75339	1	0.570323	-0.810148
	CYP2E1	1.75339	1	0.570323	-0.810148
	ZNF598	1.75339	1	0.570323	-0.810148
	SYCP2L	1.75339	1	0.570323	-0.810148
	LOC392226	1.75339	1	0.570323	-0.810148
	CPA1	1.75339	1	0.570323	-0.810148
	STRADA	1.75339	1	0.570323	-0.810148
	SPRR1A	1.75339	1	0.570323	-0.810148
	CUL9	1.75339	1	0.570323	-0.810148
	MRPL16	1.75339	1	0.570323	-0.810148
	RASGEF1B	1.75339	1	0.570323	-0.810148
	G0S2	1.75339	1	0.570323	-0.810148
	ASCC2	1.75339	1	0.570323	-0.810148
	SEMA6B	1.75339	1	0.570323	-0.810148
	PDCD1	1.75339	1	0.570323	-0.810148
	CAPS	1.75339	1	0.570323	-0.810148
	CCR3	1.75339	1	0.570323	-0.810148
	TMEM207	1.75339	1	0.570323	-0.810148
	CEL	1.75339	1	0.570323	-0.810148
	PLAC4	1.75339	1	0.570323	-0.810148
	TGIF2LY	1.75339	1	0.570323	-0.810148
	GOLGA1	1.75339	1	0.570323	-0.810148
	CCDC42	1.75339	1	0.570323	-0.810148
	CDKN2AIPNL	1.75339	1	0.570323	-0.810148
	CA8	1.75339	1	0.570323	-0.810148
	CFDP1	1.75339	1	0.570323	-0.810148
	PCDH10	1.75339	1	0.570323	-0.810148
	EPDR1	1.75339	1	0.570323	-0.810148
	HIST2H2BE	1.75339	1	0.570323	-0.810148
	INSRR	1.75339	1	0.570323	-0.810148
	HIST1H2BD	1.75339	1	0.570323	-0.810148
	GPD1	1.75339	1	0.570323	-0.810148
	OR8A1	1.75586	1	0.569522	-0.812175
	tAKR	1.75586	1	0.569522	-0.812175
	GPR148	1.75586	1	0.569522	-0.812175
	SRSF5	1.75586	1	0.569522	-0.812175
	LPHN2	1.75586	1	0.569522	-0.812175
	C21orf56	1.75586	1	0.569522	-0.812175
	C2orf48	1.75586	1	0.569522	-0.812175
	SLC9A4	1.75586	1	0.569522	-0.812175
	KAZN	1.75586	1	0.569522	-0.812175
	PEF1	1.75586	1	0.569522	-0.812175
	DDX19-DDX19L	1.75688	1	0.56919	-0.813018
	FKBP1C	1.75699	1	0.569154	-0.813108
	SLC44A2	1.75763	1	0.568948	-0.813631
	PRRX1	1.75812	1	0.568791	-0.81403
	LOC388438	1.76257	1	0.567352	-0.817684
	NPFFR2	1.76257	1	0.567352	-0.817684
	CCDC113	1.7642	1	0.56683	-0.819012
	FLJ40852	1.7642	1	0.56683	-0.819012
	FAM107A	1.7678	1	0.565675	-0.821954
	GNG7	1.77126	1	0.564569	-0.824777
	NCRNA00242	1.7764	1	0.562938	-0.828953
	TMPRSS3	1.77797	1	0.56244	-0.83023
	OR1J4	1.7786	1	0.562239	-0.830746
	RAB3IL1	1.7786	1	0.562239	-0.830746
	CTHRC1	1.7786	1	0.562239	-0.830746
	MUM1L1	1.7786	1	0.562239	-0.830746
	OLFML2A	1.7786	1	0.562239	-0.830746
	TBCEL	1.77866	1	0.562222	-0.830787
	SPOCK3	1.7803	1	0.561704	-0.832119
	WFDC2	1.7803	1	0.561704	-0.832119
	STX1B	1.7803	1	0.561704	-0.832119
	GAD1	1.7803	1	0.561704	-0.832119
	ZNF83	1.7803	1	0.561704	-0.832119
	EIF3J	1.78157	1	0.561303	-0.833149
	TRAF3IP1	1.78454	1	0.56037	-0.835549
	KCNMB1	1.78454	1	0.56037	-0.835549
	ZNF792	1.78954	1	0.558802	-0.83959
	C14orf139	1.79365	1	0.557522	-0.842898
	PCDHGC3	1.79365	1	0.557522	-0.842898
	CD5	1.79365	1	0.557522	-0.842898
	GCC1	1.79365	1	0.557522	-0.842898
	SIX2	1.79365	1	0.557522	-0.842898
	LEPREL2	1.79365	1	0.557522	-0.842898
	UCMA	1.79468	1	0.557204	-0.843723
	RANBP1	1.79468	1	0.557204	-0.843723
	AADACL4	1.79471	1	0.557194	-0.843747
	TTL	1.79471	1	0.557194	-0.843747
	C6orf114	1.79529	1	0.557012	-0.844219
	FGD4	1.79767	1	0.556275	-0.846129
	MAN1A2	1.79817	1	0.556122	-0.846528
	DEFB110	1.79822	1	0.556106	-0.846567
	SARNP	1.79831	1	0.556078	-0.84664
	FAM156A	1.80127	1	0.555163	-0.849017
	RNASE10	1.80127	1	0.555163	-0.849017
	ALLC	1.80323	1	0.55456	-0.850585
	PDE6B	1.80488	1	0.554055	-0.851899
	CCDC110	1.80488	1	0.554055	-0.851899
	TDRD5	1.80556	1	0.553844	-0.852448
	C1orf124	1.80618	1	0.553655	-0.852941
	PRG3	1.8072	1	0.553341	-0.85376
	AQP9	1.8072	1	0.553341	-0.85376
	PPIL6	1.8072	1	0.553341	-0.85376
	TNFRSF11A	1.8072	1	0.553341	-0.85376
	HIATL2	1.8072	1	0.553341	-0.85376
	NMUR1	1.8072	1	0.553341	-0.85376
	MCCD1	1.8072	1	0.553341	-0.85376
	C10orf114	1.8072	1	0.553341	-0.85376
	FADS3	1.8072	1	0.553341	-0.85376
	GABRR2	1.8072	1	0.553341	-0.85376
	CA6	1.8072	1	0.553341	-0.85376
	ZNF302	1.8072	1	0.553341	-0.85376
	CPT1B	1.8072	1	0.553341	-0.85376
	OC90	1.8072	1	0.553341	-0.85376
	TMEM99	1.8072	1	0.553341	-0.85376
	PCK1	1.8072	1	0.553341	-0.85376
	C17orf73	1.8072	1	0.553341	-0.85376
	RNF151	1.8072	1	0.553341	-0.85376
	FAM70B	1.8072	1	0.553341	-0.85376
	NRXN2	1.8072	1	0.553341	-0.85376
	TMEM141	1.8072	1	0.553341	-0.85376
	HUWE1	1.8072	1	0.553341	-0.85376
	KIF5A	1.8072	1	0.553341	-0.85376
	PHACTR3	1.8072	1	0.553341	-0.85376
	SND1	1.8072	1	0.553341	-0.85376
	PMEL	1.8072	1	0.553341	-0.85376
	COL4A5	1.8072	1	0.553341	-0.85376
	ZNF608	1.8072	1	0.553341	-0.85376
	SCN3A	1.8072	1	0.553341	-0.85376
	TMEM101	1.8072	1	0.553341	-0.85376
	RPS17	1.8072	1	0.553341	-0.85376
	ESR1	1.8072	1	0.553341	-0.85376
	FLJ36031	1.8072	1	0.553341	-0.85376
	HOGA1	1.8072	1	0.553341	-0.85376
	ADAM21	1.8072	1	0.553341	-0.85376
	CCR6	1.8072	1	0.553341	-0.85376
	C1orf220	1.8072	1	0.553341	-0.85376
	FCGR3B	1.80784	1	0.553146	-0.854268
	C1orf109	1.81131	1	0.552086	-0.857036
	HSPC179	1.81441	1	0.551144	-0.859499
	FAM151B	1.81568	1	0.550758	-0.860511
	SLC11A2	1.81568	1	0.550758	-0.860511
	C3orf77	1.81568	1	0.550758	-0.860511
	UNC5C	1.81568	1	0.550758	-0.860511
	KLHDC3	1.81568	1	0.550758	-0.860511
	C6orf123	1.81568	1	0.550758	-0.860511
	TSHZ2	1.81568	1	0.550758	-0.860511
	CNPY3	1.81568	1	0.550758	-0.860511
	NPNT	1.81568	1	0.550758	-0.860511
	CHST13	1.81568	1	0.550758	-0.860511
	C17orf53	1.81568	1	0.550758	-0.860511
	C19orf66	1.81568	1	0.550758	-0.860511
	ZNF567	1.81568	1	0.550758	-0.860511
	DEFB132	1.81568	1	0.550758	-0.860511
	LOC400927	1.81568	1	0.550758	-0.860511
	FBXO18	1.81568	1	0.550758	-0.860511
	FGFBP2	1.81568	1	0.550758	-0.860511
	B3GALT6	1.81568	1	0.550758	-0.860511
	MYL4	1.81568	1	0.550758	-0.860511
	C10orf1	1.81568	1	0.550758	-0.860511
	LOC387702	1.81568	1	0.550758	-0.860511
	PAQR9	1.81568	1	0.550758	-0.860511
	CSAD	1.81568	1	0.550758	-0.860511
	REEP3	1.81568	1	0.550758	-0.860511
	PDE1A	1.81568	1	0.550758	-0.860511
	PFDN6L	1.81568	1	0.550758	-0.860511
	CAMK1	1.81568	1	0.550758	-0.860511
	CELF6	1.81568	1	0.550758	-0.860511
	GALM	1.81568	1	0.550758	-0.860511
	PCDHAC2	1.81568	1	0.550758	-0.860511
	ZNF721	1.81568	1	0.550758	-0.860511
	VRTN	1.81568	1	0.550758	-0.860511
	SH3TC1	1.81568	1	0.550758	-0.860511
	SLC39A5	1.81568	1	0.550758	-0.860511
	LOC401859	1.81568	1	0.550758	-0.860511
	TLCD1	1.81568	1	0.550758	-0.860511
	XKR4	1.81568	1	0.550758	-0.860511
	CYP11B1	1.81568	1	0.550758	-0.860511
	SLFNL1	1.81568	1	0.550758	-0.860511
	TMEM63C	1.81568	1	0.550758	-0.860511
	ZMYM5	1.81568	1	0.550758	-0.860511
	GALK1	1.81568	1	0.550758	-0.860511
	MPPE1	1.81568	1	0.550758	-0.860511
	TBL2	1.81801	1	0.550052	-0.862361
	ARHGAP21	1.81801	1	0.550052	-0.862361
	FRG1	1.82161	1	0.548964	-0.865216
	C4orf46	1.82356	1	0.548377	-0.866759
	MAGEA6	1.82458	1	0.548072	-0.867563
	RASGRF1	1.82458	1	0.548072	-0.867563
	ROPN1B	1.82898	1	0.546754	-0.871037
	NBPF14	1.82929	1	0.546659	-0.871286
	S100A5	1.83115	1	0.546106	-0.872747
	RBM10	1.83144	1	0.546018	-0.872981
	LOC401313	1.83144	1	0.546018	-0.872981
	PAX6	1.83144	1	0.546018	-0.872981
	IGFBP7	1.83144	1	0.546018	-0.872981
	ZNF691	1.83144	1	0.546018	-0.872981
	HIST1H4K	1.83144	1	0.546018	-0.872981
	XIRP2	1.83144	1	0.546018	-0.872981
	C12orf47	1.83144	1	0.546018	-0.872981
	DBR1	1.83178	1	0.545917	-0.873248
	BDKRB2	1.83411	1	0.545223	-0.875081
	HEATR3	1.83411	1	0.545223	-0.875081
	KCNH5	1.83411	1	0.545223	-0.875081
	BGN	1.83411	1	0.545223	-0.875081
	CRYGN	1.83411	1	0.545223	-0.875081
	TTC39A	1.83411	1	0.545223	-0.875081
	FAM27E3	1.83411	1	0.545223	-0.875081
	FBXW5	1.83411	1	0.545223	-0.875081
	MVK	1.83411	1	0.545223	-0.875081
	ARSF	1.83411	1	0.545223	-0.875081
	CXCR6	1.83458	1	0.545085	-0.875448
	SELV	1.83835	1	0.543966	-0.878411
	HSPA13	1.83835	1	0.543966	-0.878411
	NHLRC3	1.83835	1	0.543966	-0.878411
	ITGAL	1.84195	1	0.542902	-0.881235
	ADAM12	1.84317	1	0.542542	-0.882193
	PEG3	1.84492	1	0.54203	-0.883556
	C11orf52	1.84852	1	0.540974	-0.88637
	YPEL4	1.85034	1	0.540441	-0.88779
	GAGE6	1.85034	1	0.540441	-0.88779
	C17orf70	1.85276	1	0.539736	-0.889674
	NRD1	1.85276	1	0.539736	-0.889674
	TMEM183B	1.85276	1	0.539736	-0.889674
	ISL2	1.85276	1	0.539736	-0.889674
	DEGS2	1.85509	1	0.539058	-0.891487
	MGC35440	1.85777	1	0.538279	-0.893574
	TRAM1L1	1.85849	1	0.538072	-0.89413
	OCLN	1.85849	1	0.538072	-0.89413
	HES4	1.85992	1	0.537657	-0.895242
	LOC441877	1.86102	1	0.53734	-0.896092
	WT1-AS	1.86102	1	0.53734	-0.896092
	LOC402586	1.86102	1	0.53734	-0.896092
	RFT1	1.86102	1	0.53734	-0.896092
	ARID2	1.86102	1	0.53734	-0.896092
	BRWD3	1.86102	1	0.53734	-0.896092
	LRWD1	1.86102	1	0.53734	-0.896092
	LGALS3BP	1.86102	1	0.53734	-0.896092
	DBH	1.86102	1	0.53734	-0.896092
	PRPF3	1.86102	1	0.53734	-0.896092
	WDR65	1.86102	1	0.53734	-0.896092
	PTRF	1.86102	1	0.53734	-0.896092
	SPHAR	1.86102	1	0.53734	-0.896092
	C6orf155	1.86102	1	0.53734	-0.896092
	DEPDC4	1.86102	1	0.53734	-0.896092
	OXTR	1.86102	1	0.53734	-0.896092
	ZNF137P	1.86102	1	0.53734	-0.896092
	KLHL13	1.86102	1	0.53734	-0.896092
	ERI3	1.86102	1	0.53734	-0.896092
	LOC441410	1.86102	1	0.53734	-0.896092
	WBP4	1.86102	1	0.53734	-0.896092
	REM1	1.86102	1	0.53734	-0.896092
	BSN	1.86102	1	0.53734	-0.896092
	TMEM178	1.86102	1	0.53734	-0.896092
	PAPPA	1.86102	1	0.53734	-0.896092
	HLF	1.86102	1	0.53734	-0.896092
	MPV17L2	1.86102	1	0.53734	-0.896092
	SCEL	1.86102	1	0.53734	-0.896092
	SLC19A3	1.86102	1	0.53734	-0.896092
	SGK196	1.86102	1	0.53734	-0.896092
	IRF8	1.86102	1	0.53734	-0.896092
	FATE1	1.86102	1	0.53734	-0.896092
	FRG2C	1.86102	1	0.53734	-0.896092
	FLJ10246	1.86102	1	0.53734	-0.896092
	MPP4	1.86102	1	0.53734	-0.896092
	FGF2	1.86102	1	0.53734	-0.896092
	PARM1	1.86102	1	0.53734	-0.896092
	PIWIL4	1.86102	1	0.53734	-0.896092
	C7	1.86102	1	0.53734	-0.896092
	C11orf53	1.86102	1	0.53734	-0.896092
	NBPF1	1.86102	1	0.53734	-0.896092
	C15orf37	1.86102	1	0.53734	-0.896092
	TUB	1.86102	1	0.53734	-0.896092
	SLPI	1.86102	1	0.53734	-0.896092
	CENPP	1.86102	1	0.53734	-0.896092
	GP5	1.86207	1	0.537036	-0.896908
	IQCF2	1.86229	1	0.536973	-0.897078
	S100A7	1.86229	1	0.536973	-0.897078
	FAM74A4	1.86574	1	0.535979	-0.899751
	LFNG	1.86589	1	0.535937	-0.899866
	ARHGAP20	1.86886	1	0.535086	-0.902157
	GRIA3	1.86924	1	0.534978	-0.902448
	LOC143188	1.86924	1	0.534978	-0.902448
	IFT80	1.86924	1	0.534978	-0.902448
	LOC146336	1.86924	1	0.534978	-0.902448
	GAB3	1.86924	1	0.534978	-0.902448
	ADAMTS7	1.86924	1	0.534978	-0.902448
	CNPPD1	1.86924	1	0.534978	-0.902448
	STAP1	1.86924	1	0.534978	-0.902448
	SNTB1	1.86924	1	0.534978	-0.902448
	PCDH1	1.86924	1	0.534978	-0.902448
	LOC442601	1.86924	1	0.534978	-0.902448
	WDR86	1.86949	1	0.534904	-0.902648
	WFIKKN2	1.87314	1	0.533864	-0.905457
	C17orf56	1.87827	1	0.532404	-0.909406
	RAPGEF3	1.87839	1	0.53237	-0.909498
	LOC149134	1.87991	1	0.531939	-0.910667
	TTC21A	1.88097	1	0.531641	-0.911475
	CAPN13	1.88115	1	0.53159	-0.911613
	NOD1	1.88793	1	0.529682	-0.916802
	GOLGA2B	1.88793	1	0.529682	-0.916802
	SERPIND1	1.88793	1	0.529682	-0.916802
	INPP5B	1.88793	1	0.529682	-0.916802
	NCRNA00246	1.88793	1	0.529682	-0.916802
	C7orf60	1.88793	1	0.529682	-0.916802
	NRAP	1.88793	1	0.529682	-0.916802
	NKIRAS1	1.88793	1	0.529682	-0.916802
	TTLL2	1.88813	1	0.529624	-0.91696
	GLRA4	1.88983	1	0.529147	-0.918259
	IZUMO4	1.88983	1	0.529147	-0.918259
	LAX1	1.88983	1	0.529147	-0.918259
	CLEC1A	1.88983	1	0.529147	-0.918259
	NNAT	1.88983	1	0.529147	-0.918259
	ECM2	1.88983	1	0.529147	-0.918259
	ZNF446	1.88983	1	0.529147	-0.918259
	BRIX1	1.88983	1	0.529147	-0.918259
	KERA	1.88983	1	0.529147	-0.918259
	ATP5I	1.88983	1	0.529147	-0.918259
	IDO1	1.88983	1	0.529147	-0.918259
	ARHGAP10	1.88983	1	0.529147	-0.918259
	TCEAL3	1.88983	1	0.529147	-0.918259
	KLRAQ1	1.88983	1	0.529147	-0.918259
	MBTD1	1.88983	1	0.529147	-0.918259
	RPN2	1.88983	1	0.529147	-0.918259
	NOX1	1.88983	1	0.529147	-0.918259
	ARRDC2	1.88983	1	0.529147	-0.918259
	TRA2B	1.88983	1	0.529147	-0.918259
	LOC389069	1.88983	1	0.529147	-0.918259
	SLC12A5	1.88983	1	0.529147	-0.918259
	TMEM132A	1.88983	1	0.529147	-0.918259
	LOC401361	1.88983	1	0.529147	-0.918259
	LOC440367	1.88983	1	0.529147	-0.918259
	NBPF9	1.88983	1	0.529147	-0.918259
	SLC39A10	1.88983	1	0.529147	-0.918259
	TANC2	1.88983	1	0.529147	-0.918259
	LCE6A	1.88983	1	0.529147	-0.918259
	GAGE10	1.88983	1	0.529147	-0.918259
	LPPR1	1.88983	1	0.529147	-0.918259
	BGLAP	1.88983	1	0.529147	-0.918259
	TGM4	1.88983	1	0.529147	-0.918259
	C17orf76	1.88983	1	0.529147	-0.918259
	CYP1B1	1.88983	1	0.529147	-0.918259
	GMPPB	1.88983	1	0.529147	-0.918259
	SLC25A10	1.88983	1	0.529147	-0.918259
	NCKAP1L	1.88983	1	0.529147	-0.918259
	SKOR1	1.88983	1	0.529147	-0.918259
	CYP2F1	1.88983	1	0.529147	-0.918259
	PMCH	1.88983	1	0.529147	-0.918259
	GLIPR1L2	1.88983	1	0.529147	-0.918259
	FNTA	1.88983	1	0.529147	-0.918259
	FLJ46230	1.89127	1	0.528746	-0.919353
	RHBDL2	1.89216	1	0.528496	-0.920037
	LOC400499	1.8927	1	0.528346	-0.920445
	C1QTNF9	1.8928	1	0.528318	-0.920521
	RPP25	1.89342	1	0.528146	-0.920991
	HIST2H2AC	1.89513	1	0.527669	-0.922296
	DIO1	1.89577	1	0.527491	-0.92278
	TXNDC3	1.89577	1	0.527491	-0.92278
	NDOR1	1.89628	1	0.527348	-0.923173
	PTPLB	1.89843	1	0.526751	-0.924808
	RERGL	1.89873	1	0.526668	-0.925036
	NUSAP1	1.89873	1	0.526668	-0.925036
	SERINC5	1.90066	1	0.526133	-0.926501
	NEK5	1.90233	1	0.52567	-0.92777
	C2orf57	1.90345	1	0.525363	-0.928614
	IPCEF1	1.9058	1	0.524715	-0.930393
	LAD1	1.90593	1	0.524677	-0.930499
	RAR2	1.90703	1	0.524376	-0.931326
	VLDLR	1.90703	1	0.524376	-0.931326
	FZD7	1.90703	1	0.524376	-0.931326
	C11orf44	1.90703	1	0.524376	-0.931326
	ZNF709	1.90703	1	0.524376	-0.931326
	PDLIM7	1.90703	1	0.524376	-0.931326
	KCNV2	1.9125	1	0.522875	-0.935462
	ADAM23	1.91483	1	0.522239	-0.937218
	MT1M	1.91483	1	0.522239	-0.937218
	APOBEC3H	1.91483	1	0.522239	-0.937218
	PYY	1.91483	1	0.522239	-0.937218
	DNAJB9	1.91483	1	0.522239	-0.937218
	NOP14	1.91483	1	0.522239	-0.937218
	PIGC	1.91483	1	0.522239	-0.937218
	RASD1	1.91483	1	0.522239	-0.937218
	PVRL4	1.91483	1	0.522239	-0.937218
	OR2T5	1.91483	1	0.522239	-0.937218
	ZNF682	1.91483	1	0.522239	-0.937218
	YY2	1.91483	1	0.522239	-0.937218
	ZAN	1.91483	1	0.522239	-0.937218
	DEF6	1.91483	1	0.522239	-0.937218
	C15orf17	1.91483	1	0.522239	-0.937218
	NPRL3	1.91483	1	0.522239	-0.937218
	BRCC3	1.91483	1	0.522239	-0.937218
	NT5M	1.91483	1	0.522239	-0.937218
	LOC440570	1.91483	1	0.522239	-0.937218
	NDUFB2	1.91483	1	0.522239	-0.937218
	RPS6KC1	1.91483	1	0.522239	-0.937218
	NGEF	1.91483	1	0.522239	-0.937218
	CCDC129	1.91483	1	0.522239	-0.937218
	KLKB1	1.91483	1	0.522239	-0.937218
	CLCN5	1.91483	1	0.522239	-0.937218
	RAET1G	1.91483	1	0.522239	-0.937218
	STIM2	1.91483	1	0.522239	-0.937218
	FARSA	1.91483	1	0.522239	-0.937218
	WFDC12	1.91483	1	0.522239	-0.937218
	NCRNA00158	1.91483	1	0.522239	-0.937218
	ESPNL	1.91483	1	0.522239	-0.937218
	SGK494	1.91483	1	0.522239	-0.937218
	LOC402337	1.91483	1	0.522239	-0.937218
	ECI1	1.91483	1	0.522239	-0.937218
	FREM1	1.91483	1	0.522239	-0.937218
	OR4D11	1.91483	1	0.522239	-0.937218
	LOC401410	1.91483	1	0.522239	-0.937218
	TPT1	1.9161	1	0.521892	-0.938176
	HIST1H2BC	1.91907	1	0.521086	-0.940407
	C7orf43	1.91971	1	0.520913	-0.940886
	LAIR2	1.92267	1	0.52011	-0.943113
	FLJ46010	1.92267	1	0.52011	-0.943113
	CDH5	1.92331	1	0.519938	-0.94359
	FUNDC2	1.92531	1	0.519397	-0.945089
	ARL5B	1.92564	1	0.519308	-0.945336
	PRR5	1.92564	1	0.519308	-0.945336
	RPS27AP17	1.92627	1	0.519137	-0.945813
	C3orf21	1.92691	1	0.518966	-0.946289
	WDR93	1.92691	1	0.518966	-0.946289
	CMTM2	1.92691	1	0.518966	-0.946289
	CCHCR1	1.92691	1	0.518966	-0.946289
	SH3PXD2A	1.92691	1	0.518966	-0.946289
	DKFZp434I0428	1.92691	1	0.518966	-0.946289
	NKX2-2	1.92691	1	0.518966	-0.946289
	LGALS2	1.92691	1	0.518966	-0.946289
	TMEM137	1.92691	1	0.518966	-0.946289
	RGS9BP	1.92691	1	0.518966	-0.946289
	WEE1	1.93209	1	0.517575	-0.950159
	BTD	1.93284	1	0.517373	-0.950723
	DIS3L	1.93284	1	0.517373	-0.950723
	UBOX5	1.93558	1	0.516642	-0.952764
	PGA5	1.93622	1	0.516469	-0.953246
	FLJ38723	1.93941	1	0.515621	-0.955617
	TNP1	1.94133	1	0.515111	-0.957045
	NAA40	1.94174	1	0.515002	-0.957349
	GOLGA6L9	1.94174	1	0.515002	-0.957349
	TMEM169	1.94174	1	0.515002	-0.957349
	WASH5P	1.94174	1	0.515002	-0.957349
	C9orf4	1.94174	1	0.515002	-0.957349
	CATSPER4	1.94174	1	0.515002	-0.957349
	MAPKAPK2	1.94174	1	0.515002	-0.957349
	OTOP2	1.94174	1	0.515002	-0.957349
	FAM98B	1.94174	1	0.515002	-0.957349
	ECHDC3	1.94174	1	0.515002	-0.957349
	ARMC4	1.94174	1	0.515002	-0.957349
	C6orf97	1.94174	1	0.515002	-0.957349
	SPACA3	1.94174	1	0.515002	-0.957349
	TCTN1	1.94174	1	0.515002	-0.957349
	SCRN2	1.94301	1	0.514665	-0.958294
	JAGN1	1.94482	1	0.514186	-0.959637
	MS4A13	1.94482	1	0.514186	-0.959637
	LOC400889	1.94482	1	0.514186	-0.959637
	RGS8	1.94482	1	0.514186	-0.959637
	HBS1L	1.94482	1	0.514186	-0.959637
	PGAP2	1.94482	1	0.514186	-0.959637
	FLJ46347	1.94482	1	0.514186	-0.959637
	SLCO1A2	1.94482	1	0.514186	-0.959637
	VARS	1.94482	1	0.514186	-0.959637
	KDR	1.94482	1	0.514186	-0.959637
	C11orf82	1.94598	1	0.513881	-0.960495
	C3orf57	1.94661	1	0.513713	-0.960966
	TAC3	1.94958	1	0.512931	-0.963162
	IFIH1	1.94958	1	0.512931	-0.963162
	PCDHGA6	1.94958	1	0.512931	-0.963162
	GSG1	1.94958	1	0.512931	-0.963162
	MRPS17	1.94958	1	0.512931	-0.963162
	C13orf35	1.95975	1	0.51027	-0.970668
	CDH7	1.96372	1	0.509238	-0.973587
	ROPN1L	1.96372	1	0.509238	-0.973587
	FLJ40453	1.96399	1	0.509169	-0.973785
	FYTTD1	1.96399	1	0.509169	-0.973785
	CUZD1	1.96399	1	0.509169	-0.973785
	PTGIR	1.96399	1	0.509169	-0.973785
	LOC441215	1.96399	1	0.509169	-0.973785
	DERL2	1.96399	1	0.509169	-0.973785
	SEMA4B	1.96399	1	0.509169	-0.973785
	THBD	1.96399	1	0.509169	-0.973785
	ADAMTS6	1.96399	1	0.509169	-0.973785
	PARP12	1.96399	1	0.509169	-0.973785
	LOC441511	1.96399	1	0.509169	-0.973785
	PCOLCE	1.96399	1	0.509169	-0.973785
	FUBP3	1.96399	1	0.509169	-0.973785
	NAP1L4	1.96399	1	0.509169	-0.973785
	PRAMEF2	1.96399	1	0.509169	-0.973785
	PRO1068	1.96399	1	0.509169	-0.973785
	P2RX3	1.96399	1	0.509169	-0.973785
	CCDC101	1.96399	1	0.509169	-0.973785
	EXOG	1.96399	1	0.509169	-0.973785
	CLASRP	1.96399	1	0.509169	-0.973785
	C1orf198	1.96399	1	0.509169	-0.973785
	KL	1.96399	1	0.509169	-0.973785
	CNOT3	1.96399	1	0.509169	-0.973785
	NPSR1	1.96399	1	0.509169	-0.973785
	RAVER1	1.96399	1	0.509169	-0.973785
	RPL10AP3	1.96399	1	0.509169	-0.973785
	RANBP17	1.96399	1	0.509169	-0.973785
	RPAP1	1.96399	1	0.509169	-0.973785
	METTL15	1.96399	1	0.509169	-0.973785
	ENPP1	1.96399	1	0.509169	-0.973785
	HBQ1	1.96399	1	0.509169	-0.973785
	RTKN2	1.96399	1	0.509169	-0.973785
	TRPC7	1.96399	1	0.509169	-0.973785
	HIST1H2BM	1.96399	1	0.509169	-0.973785
	TCF21	1.96614	1	0.508612	-0.975363
	NOTCH3	1.96865	1	0.507963	-0.977204
	PIGX	1.96865	1	0.507963	-0.977204
	CELSR3	1.96865	1	0.507963	-0.977204
	FLYWCH1	1.96865	1	0.507963	-0.977204
	ZNF57	1.96865	1	0.507963	-0.977204
	RPL23	1.96865	1	0.507963	-0.977204
	MASP2	1.96865	1	0.507963	-0.977204
	ZNF486	1.96865	1	0.507963	-0.977204
	PARP10	1.96865	1	0.507963	-0.977204
	NECAB3	1.96865	1	0.507963	-0.977204
	NAA16	1.96865	1	0.507963	-0.977204
	GPR6	1.96865	1	0.507963	-0.977204
	TFPI2	1.96865	1	0.507963	-0.977204
	APCDD1L	1.96865	1	0.507963	-0.977204
	RPS4Y2	1.96865	1	0.507963	-0.977204
	UNQ5810	1.96865	1	0.507963	-0.977204
	GRAMD3	1.96865	1	0.507963	-0.977204
	FLJ32955	1.96865	1	0.507963	-0.977204
	MYH8	1.96865	1	0.507963	-0.977204
	LOC221442	1.96865	1	0.507963	-0.977204
	MS4A5	1.96865	1	0.507963	-0.977204
	PPP1R1B	1.96865	1	0.507963	-0.977204
	BCR	1.96865	1	0.507963	-0.977204
	PTX3	1.96865	1	0.507963	-0.977204
	RPL34	1.96865	1	0.507963	-0.977204
	LOC541473	1.96865	1	0.507963	-0.977204
	VCY	1.96865	1	0.507963	-0.977204
	FAM187B	1.96865	1	0.507963	-0.977204
	ZFYVE1	1.96865	1	0.507963	-0.977204
	PALMD	1.96865	1	0.507963	-0.977204
	PTPRVP	1.96865	1	0.507963	-0.977204
	C10orf58	1.96865	1	0.507963	-0.977204
	ZSWIM7	1.96865	1	0.507963	-0.977204
	C10orf47	1.96865	1	0.507963	-0.977204
	IGFN1	1.96865	1	0.507963	-0.977204
	MGC42105	1.96865	1	0.507963	-0.977204
	TRDN	1.96865	1	0.507963	-0.977204
	LOC440388	1.96865	1	0.507963	-0.977204
	CAMTA2	1.96865	1	0.507963	-0.977204
	LOC401589	1.96865	1	0.507963	-0.977204
	LYZL6	1.96865	1	0.507963	-0.977204
	PTPLAD1	1.96865	1	0.507963	-0.977204
	CYB561	1.96865	1	0.507963	-0.977204
	MEX3D	1.96865	1	0.507963	-0.977204
	SYT14L	1.96865	1	0.507963	-0.977204
	C16orf47	1.96865	1	0.507963	-0.977204
	ARAP1	1.96865	1	0.507963	-0.977204
	DEPDC5	1.96928	1	0.507799	-0.97767
	HTR1A	1.96928	1	0.507799	-0.97767
	SMPDL3A	1.97043	1	0.507502	-0.978514
	DGCR6	1.97288	1	0.506872	-0.980306
	CYP27B1	1.97545	1	0.506214	-0.982181
	MAST3	1.97649	1	0.505949	-0.982937
	SOS2	1.97832	1	0.505481	-0.984272
	IFNA10	1.98009	1	0.505028	-0.985564
	IFT140	1.98261	1	0.504385	-0.987404
	CCDC83	1.98261	1	0.504385	-0.987404
	RASL12	1.98261	1	0.504385	-0.987404
	KRT8P11	1.98261	1	0.504385	-0.987404
	ADAM20	1.98261	1	0.504385	-0.987404
	HSD3B1	1.98261	1	0.504385	-0.987404
	GATA4	1.98261	1	0.504385	-0.987404
	RGAG1	1.98261	1	0.504385	-0.987404
	PLK1S1	1.98426	1	0.503967	-0.988599
	ART5	1.98754	1	0.503134	-0.990986
	STXBP1	1.98962	1	0.502608	-0.992494
	DHX37	1.99148	1	0.502139	-0.993841
	FLJ40288	1.99165	1	0.502096	-0.993965
	SYNJ2BP	1.99291	1	0.501778	-0.994879
	RTKN	1.99322	1	0.5017	-0.995103
	LOC399898	1.99555	1	0.501114	-0.996788
	CFB	1.99555	1	0.501114	-0.996788
	RSPRY1	1.99555	1	0.501114	-0.996788
	LOC128322	1.99555	1	0.501114	-0.996788
	OSBPL9	1.99721	1	0.500698	-0.997987
	TM4SF19	1.99936	1	0.50016	-0.999539
	IRAK2	1.99966	1	0.500085	-0.999756
	MAN2A2	1.99979	1	0.500052	-0.999849
	PNLIPRP2	2.00043	1	0.499893	-1.00031
	PLAC2	2.00106	1	0.499734	-1.00077
	NRN1	2.00106	1	0.499734	-1.00077
	APOBEC4	2.00106	1	0.499734	-1.00077
	MRGPRD	2.00106	1	0.499734	-1.00077
	VIPR1	2.00106	1	0.499734	-1.00077
	ACTR8	2.00151	1	0.499623	-1.00109
	NSUN2	2.00151	1	0.499623	-1.00109
	DNAJB13	2.00192	1	0.49952	-1.00138
	PURB	2.00339	1	0.499153	-1.00245
	FAM116B	2.00636	1	0.498415	-1.00458
	C8orf51	2.00699	1	0.498258	-1.00504
	APOBEC3F	2.01356	1	0.496632	-1.00975
	B4GALT6	2.01356	1	0.496632	-1.00975
	SFTPB	2.01917	1	0.495252	-1.01377
	FLJ41821	2.02041	1	0.49495	-1.01465
	BLID	2.02041	1	0.49495	-1.01465
	RYK	2.02041	1	0.49495	-1.01465
	MAGEB6B	2.02041	1	0.49495	-1.01465
	TOM1L2	2.02041	1	0.49495	-1.01465
	C20orf103	2.02041	1	0.49495	-1.01465
	CASKIN2	2.02041	1	0.49495	-1.01465
	GREM2	2.02077	1	0.494862	-1.0149
	KIAA1639	2.02143	1	0.494699	-1.01538
	C6orf94	2.02205	1	0.494548	-1.01582
	NEIL1	2.02246	1	0.494447	-1.01611
	MITD1	2.02246	1	0.494447	-1.01611
	IRF2BP1	2.02246	1	0.494447	-1.01611
	KLRC3	2.02246	1	0.494447	-1.01611
	FCER2	2.02246	1	0.494447	-1.01611
	AIFM2	2.02246	1	0.494447	-1.01611
	TMEM126A	2.02246	1	0.494447	-1.01611
	OR2M4	2.02246	1	0.494447	-1.01611
	AMELX	2.02246	1	0.494447	-1.01611
	CENPO	2.02246	1	0.494447	-1.01611
	FLJ42986	2.02246	1	0.494447	-1.01611
	FKBPL	2.02246	1	0.494447	-1.01611
	SRD5A3	2.02246	1	0.494447	-1.01611
	C1orf182	2.02246	1	0.494447	-1.01611
	KRTAP10-9	2.02246	1	0.494447	-1.01611
	MECOM	2.02246	1	0.494447	-1.01611
	SPDYE3	2.02246	1	0.494447	-1.01611
	GTPBP3	2.02246	1	0.494447	-1.01611
	CLCF1	2.02246	1	0.494447	-1.01611
	LAMP3	2.02246	1	0.494447	-1.01611
	CD22	2.02246	1	0.494447	-1.01611
	PANK4	2.02246	1	0.494447	-1.01611
	HTR1D	2.02246	1	0.494447	-1.01611
	MSX2	2.02246	1	0.494447	-1.01611
	DPPA4	2.02246	1	0.494447	-1.01611
	CDH6	2.02246	1	0.494447	-1.01611
	COL1A2	2.02246	1	0.494447	-1.01611
	PAQR7	2.02246	1	0.494447	-1.01611
	ARL2	2.02246	1	0.494447	-1.01611
	VAX2	2.02246	1	0.494447	-1.01611
	SRY	2.02246	1	0.494447	-1.01611
	ZBTB42	2.02246	1	0.494447	-1.01611
	NDUFB10	2.02246	1	0.494447	-1.01611
	LOC152586	2.02246	1	0.494447	-1.01611
	CRHR1	2.02246	1	0.494447	-1.01611
	C6orf15	2.02246	1	0.494447	-1.01611
	RAB39	2.02246	1	0.494447	-1.01611
	SPRNP1	2.02246	1	0.494447	-1.01611
	CCDC105	2.02246	1	0.494447	-1.01611
	CEND1	2.02246	1	0.494447	-1.01611
	CBWD1	2.02246	1	0.494447	-1.01611
	ACOX2	2.02246	1	0.494447	-1.01611
	VN1R2	2.02246	1	0.494447	-1.01611
	C5orf22	2.02246	1	0.494447	-1.01611
	LMBRD2	2.02246	1	0.494447	-1.01611
	MYO9A	2.02246	1	0.494447	-1.01611
	OTUD6A	2.02246	1	0.494447	-1.01611
	LOC389333	2.02246	1	0.494447	-1.01611
	CPA3	2.02246	1	0.494447	-1.01611
	C2orf42	2.02246	1	0.494447	-1.01611
	PRKAB1	2.0231	1	0.494292	-1.01656
	GEN1	2.02373	1	0.494137	-1.01702
	LOC441136	2.02373	1	0.494137	-1.01702
	HRH4	2.02426	1	0.494008	-1.01739
	LRRC41	2.0267	1	0.493414	-1.01913
	EBLN2	2.02856	1	0.492961	-1.02045
	FAM169B	2.0303	1	0.492538	-1.02169
	CADPS2	2.03519	1	0.491353	-1.02517
	POMT1	2.03814	1	0.490644	-1.02725
	METTL13	2.03814	1	0.490644	-1.02725
	PRMT2	2.03814	1	0.490644	-1.02725
	AKR1C1	2.03814	1	0.490644	-1.02725
	ZNF497	2.03814	1	0.490644	-1.02725
	ALG1L	2.03814	1	0.490644	-1.02725
	LOC387873	2.03814	1	0.490644	-1.02725
	PPAPDC1A	2.03814	1	0.490644	-1.02725
	ZMAT1	2.03814	1	0.490644	-1.02725
	GPR78	2.03814	1	0.490644	-1.02725
	LOC341415	2.03814	1	0.490644	-1.02725
	DET1	2.03814	1	0.490644	-1.02725
	GMPR	2.03814	1	0.490644	-1.02725
	ESM1	2.03814	1	0.490644	-1.02725
	CASZ1	2.03814	1	0.490644	-1.02725
	PFKL	2.03814	1	0.490644	-1.02725
	METAP1D	2.03814	1	0.490644	-1.02725
	DDAH2	2.03814	1	0.490644	-1.02725
	GLS2	2.03814	1	0.490644	-1.02725
	DPEP3	2.03814	1	0.490644	-1.02725
	SERINC2	2.03814	1	0.490644	-1.02725
	ZNF606	2.03814	1	0.490644	-1.02725
	AICDA	2.03814	1	0.490644	-1.02725
	PISD	2.03814	1	0.490644	-1.02725
	HIST1H2AG	2.03814	1	0.490644	-1.02725
	C1QTNF7	2.03814	1	0.490644	-1.02725
	ATP11A	2.03814	1	0.490644	-1.02725
	LOC440091	2.03814	1	0.490644	-1.02725
	PRPF38A	2.03814	1	0.490644	-1.02725
	DTNB	2.03814	1	0.490644	-1.02725
	PSD2	2.03814	1	0.490644	-1.02725
	SLC16A2	2.03814	1	0.490644	-1.02725
	DPY19L4	2.03814	1	0.490644	-1.02725
	APOA1BP	2.03814	1	0.490644	-1.02725
	OPRL1	2.03814	1	0.490644	-1.02725
	ROMO1	2.03814	1	0.490644	-1.02725
	PCDHB15	2.03814	1	0.490644	-1.02725
	CTIF	2.03814	1	0.490644	-1.02725
	TCP11L2	2.03814	1	0.490644	-1.02725
	ATP2A1	2.03814	1	0.490644	-1.02725
	SH2D3C	2.0393	1	0.490364	-1.02808
	NEK10	2.04047	1	0.490083	-1.0289
	GEM	2.04047	1	0.490083	-1.0289
	TMEM105	2.04407	1	0.48922	-1.03145
	CDKL4	2.04459	1	0.489096	-1.03181
	FAM75A7	2.04704	1	0.488511	-1.03354
	C10orf67	2.04767	1	0.488359	-1.03399
	EARS2	2.04834	1	0.4882	-1.03446
	GJD4	2.04834	1	0.4882	-1.03446
	OR4C11	2.04937	1	0.487956	-1.03518
	DGKG	2.04937	1	0.487956	-1.03518
	TIMM9	2.04937	1	0.487956	-1.03518
	CCDC96	2.0496	1	0.4879	-1.03534
	MED31	2.0496	1	0.4879	-1.03534
	VCP	2.05064	1	0.487653	-1.03607
	SIX5	2.05104	1	0.487559	-1.03635
[truncated: 17,131 more rows]
