# Supplementary material for: Identification of a core TP53 transcriptional program with highly distributed tumor suppressive activity
Source: HighWire-hosted journal article supplement (doi:10.1101/gr.220533.117), 2017-09-13
Supplement: Supplemental_File_S9_TCGA_mutation_data.xlsx [file Supplemental_File_S9_TCGA_mutation_data.xlsx]

## Sheet: TCGA data used for analysis
	Cancer type (study)	Cancer type acronym	Total number of tumor samples	Number of samples with TP53 mutation	Number of samples with wt TP53	Total number of tumor samples	Number of samples with TP53 mutation	Number of samples with wt TP53
			Mutation frequency analysis			CNV analysis
	Bladder Urothelial Carcinoma	blca	99	50	49	96	49	47
	Breast Invasive Carcinoma	brca	771	254	517	759	252	507
	Cervical Squamous CC	cesc	39	2	37	36	2	34
	Colorectal Adenocarcinoma	coadread	224	120	104	220	117	103
	Glioblastoma	gbm	291	83	208	280	82	198
	Head and Neck SCC	hnsc	306	213	93	302	211	91
	Kidney Renal Clear CC	kirc	417	9	408	415	9	406
	Kidney renal papillary CC	kirp	100	2	98	100	2	98
	Acute Myeloid Leukemia	laml	196	15	181	187	15	172
	Lower Grade Glioma	lgg	170	88	82	169	88	81
	Lung Adenocarcinoma	luad	230	120	110	172	87	85
	Lung SCC	lusc	178	141	37	178	141	37
	Ovarian Serous Cystadenocarc.	ov	316	299	17	311	295	16
	Pancreatic Adenocarcinoma	paad	34	22	12	27	18	9
	Prostate Adenocarcinoma	prad	83	5	78	82	5	77
	Skin Cutaneous Melanoma	skcm	253	37	216	249	37	212
	Stomach Adenocarcinoma	stad	151	68	83	115	51	64
	Papillary Thyroid Carcinoma	thca	323	3	320	318	3	315
	Uterine Corpus Endometrioid Carc.	ucec	248	69	179	242	68	174
	Highlighted in green are studies with sufficient number of samples in both TP53 wt and mutant categories. These studies were used for separated SMG identification and CN loss analysis based on TP53 status.

## Sheet: SMG identification by MutSigCV
	Pancreatic Adenocarcinoma					Breast Invasive Carcinoma					Acute Myeloid Leukemia					Colorectal Adenocarcinoma					Uterine Corpus Endometrioid Carc.					Head and Neck SCC					Glioblastoma					Lower Grade Glioma					Lung Adenocarcinoma					Stomach Adenocarcinoma
	Gene ID	Mutation freq.	MutSigCV padj	Gene rank		Gene ID	Mutation freq.	MutSigCV padj	Gene rank		Gene ID	Mutation freq.	MutSigCV padj	Gene rank		Gene ID	Mutation freq.	MutSigCV padj	Gene rank		Gene ID	Mutation freq.	MutSigCV padj	Gene rank		Gene ID	Mutation freq.	MutSigCV padj	Gene rank		Gene ID	Mutation freq.	MutSigCV padj	Gene rank		Gene ID	Mutation freq.	MutSigCV padj	Gene rank		Gene ID	Mutation freq.	MutSigCV padj	Gene rank		Gene ID	Mutation freq.	MutSigCV padj	Gene rank
	TP53	0.647059	2.0941e-11	1		PTEN	0.0376135	0	1		TP53	0.0765306	0	1		TP53	0.535714	0	1		KRAS	0.21371	0	1		CDKN2A	0.215686	0	1		TP53	0.285223	0	1		IDH1	0.770588	0	1		TP53	0.521739	0	1		TP53	0.450331	0	1
	KRAS	0.705882	6.28231e-11	2		PIK3R1	0.0272374	0	2		NRAS	0.0765306	0	2		KRAS	0.433036	0	2		PTEN	0.649194	0	2		CASP8	0.0882353	0	2		PTEN	0.309278	0	2		ATRX	0.429412	1.32626e-11	2		KRAS	0.26087	0	2		CBWD1	0.125828	3.14115e-12	2
	VAMP3	0.205882	6.71893e-08	3		RB1	0.0181582	0	3		IDH1	0.0969388	0	3		NRAS	0.0892857	0	3		PIK3R1	0.334677	0	3		HRAS	0.0326797	0	3		RB1	0.0859107	0	3		TP53	0.517647	1.32626e-11	3		KEAP1	0.169565	0	3		ACVR2A	0.125828	3.32962e-10	3
	HMGB2	0.176471	1.396e-06	4		CASP8	0.0129702	0	4		CEBPA	0.0663265	0	4		FBXW7	0.169643	0	4		RPL22	0.125	0	4		FAT1	0.235294	0	4		IDH1	0.0515464	0	4		CIC	0.205882	5.33996e-11	4		STK11	0.0869565	1.36117e-11	4		RPL22	0.0728477	6.64878e-10	4
	OR10A7	0.235294	1.51795e-06	5		MAP2K4	0.0415045	0	5		WT1	0.0612245	0	5		APC	0.772321	0	5		CTCF	0.181452	0	5		PIK3CA	0.20915	2.0941e-12	5		RPL5	0.0274914	0	5		PIK3R1	0.0705882	4.00139e-05	5		RIMS2	0.169565	0.000713483	5		RNF43	0.112583	1.46077e-07	5
	PCP4L1	0.147059	1.85692e-05	6		MAP3K1	0.07393	0	6		FLT3	0.270408	5.23526e-12	6		ACVR2A	0.111607	5.58427e-12	6		CTNNB1	0.298387	0	6		TP53	0.696078	9.07444e-12	6		PIK3CA	0.109966	2.0941e-12	6		PIK3CA	0.0882353	0.000368603	6		MUC7	0.073913	0.000906663	6		KRAS	0.112583	0.000387153	6
	GIGYF1	0.235294	4.69851e-05	7		GATA3	0.105058	0	7		RUNX1	0.0918367	5.23526e-12	7		TCF7L2	0.129464	1.25646e-11	7		TP53	0.278226	3.29073e-12	7		NOTCH1	0.19281	1.04705e-11	7		PIK3R1	0.113402	8.37641e-12	7		ARID1A	0.0647059	0.000659835	7		KRTAP5-5	0.1	0.00149151	7		ARID1A	0.18543	0.000476512	7
	TREML2	0.176471	6.21888e-05	8		CDKN1B	0.00907912	0	8		NPM1	0.27551	5.23526e-12	8		SMAD4	0.116071	6.64616e-10	8		PIK3CA	0.532258	8.84177e-12	8		MLL2	0.183007	7.722e-11	8		EGFR	0.264605	1.61115e-09	8		FUBP1	0.111765	0.0092394	8		CDKN2A	0.0652174	0.00746495	8		PIK3CA	0.165563	0.00305108	8
	CDKN2A	0.176471	0.000114994	9		TMEM30B	0.00129702	0	9		DNMT3A	0.260204	2.00103e-11	9		TGFBR2	0.102679	7.32703e-10	9		ARID1A	0.334677	8.84177e-12	9		NSD1	0.107843	6.5276e-08	9		ATRX	0.0584192	9.04518e-05	9		IL32	0.0235294	0.00932092	9		CD5L	0.0652174	0.00746495	9		INO80E	0.0596026	0.00358237	9
	PASD1	0.205882	0.000177264	10		TMED10	0.00259403	0	10		IDH2	0.102041	2.21975e-11	10		AIM2	0.0535714	6.94628e-07	10		SPOP	0.0846774	8.03818e-05	10		EPHA2	0.0424837	0.00074543	10		NF1	0.109966	0.000354754	10		PTEN	0.0470588	0.0168238	10		ODF1	0.0304348	0.0119676	10		EIF5A2	0.0331126	0.0425235	10
	HFE2	0.176471	0.000202636	11		CDH1	0.0713359	0	11		TET2	0.0867347	2.41774e-11	11		FAM123B	0.111607	5.72466e-06	11		FGFR2	0.125	0.000189331	11		B2M	0.0228758	0.00119603	11		PRB2	0.0206186	0.00323757	11		TIMD4	0.0352941	0.0194479	11		RB1	0.0565217	0.0222169	11		UPF3A	0.0662252	0.0935684	11
	SMAD4	0.235294	0.000278094	12		TBL1XR1	0.0116732	0	12		U2AF1	0.0408163	0.000630561	12		SMAD2	0.0669643	0.000554053	12		PPP2R1A	0.108871	0.000374294	12		ZNF750	0.0424837	0.0077192	12		STAG2	0.0412371	0.00649535	12		TCF12	0.0352941	0.0194479	12		SPRR3	0.0304348	0.0235841	12		HLA-B	0.0662252	0.127272	12
	CD300A	0.147059	0.000278094	13		GPS2	0.0077821	0	13		KRAS	0.0408163	0.00152385	13		SOX9	0.0446429	0.00399872	13		ARID5B	0.116935	0.00769374	13		NFE2L2	0.0555556	0.0120112	13		KEL	0.0446735	0.0218142	13		HDAC2	0.0294118	0.0260658	13		RFC4	0.00434783	1	13		RHOA	0.0463576	0.21438	13
	ADAD1	0.176471	0.00044181	14		ATN1	0.0181582	0	14		PHF6	0.0306122	0.00364195	14		ELF3	0.0357143	0.00698414	14		CCND1	0.0604839	0.0351809	14		FBXW7	0.0490196	0.0311038	14		SEMG1	0.0274914	0.0889151	14		NOTCH1	0.1	0.217927	14		PODXL	0.0130435	1	14		SMAD4	0.0860927	0.728865	14
	POP5	0.117647	0.000504928	15		AKT1	0.0246433	0	15		STAG2	0.0306122	0.00423095	15		MBD4	0.0491071	0.0124786	15		MORC4	0.0806452	0.0498877	15		HLA-B	0.0294118	0.079543	15		TPTE2	0.0274914	0.975385	15		MUC7	0.0294118	0.508511	15		POP5	0.00434783	1	15		PPM1D	0.0198675	1	15
	LNP1	0.205882	0.000535194	16		CBFB	0.0207523	0	16		RAD21	0.0255102	0.0101679	16		SEC63	0.0803571	0.0138701	16		CHD4	0.141129	0.0535111	16		CSNK2A1	0.0196078	0.079543	16		PLEKHG5	0.00343643	1	16		CRIPAK	0.0235294	0.786995	16		PPM1D	0.0217391	1	16		PPP2R1A	0.0264901	1	16
	LYPD3	0.147059	0.000535194	17		CCDC144NL	0.0077821	0	17		PTPN11	0.0459184	0.012738	17		B2M	0.0223214	0.0928912	17		TNFAIP6	0.0483871	0.0792459	17		CTCF	0.0359477	0.101614	17		PODXL	0.0103093	1	17		PPP6C	0	1	17		PPP2R1A	0.0130435	1	17		PPP2R4	0.013245	1	17
	FUZ	0.176471	0.000544467	18		TBX3	0.0233463	0	18		KIT	0.0408163	0.0343722	18		CASP5	0.0491071	0.155968	18		FBXW7	0.157258	0.354617	18		RB1	0.0326797	0.106781	18		POP5	0	1	18		PPP2R1A	0	1	18		RPTN	0.0347826	1	18		PPP6C	0	1	18
	BTN2A2	0.147059	0.000639359	19		SLC22A14	0.00389105	0	19		PPP2R1A	0	1	19		ARID1A	0.09375	0.190969	19		RB1	0.0806452	0.354617	19		RASA1	0.0457516	0.113643	19		PPM1D	0.00343643	1	19		PRB2	0.0176471	1	19		RPL5	0.00434783	1	19		POP5	0	1	19
	TMCC1	0.176471	0.000639359	20		SLAMF7	0.00518807	0	20		PPP2R4	0	1	20		PTEN	0.0357143	0.545577	20		NLRP6	0.00806452	1	20		IL32	0.0130719	0.32388	20		RPTN	0.0137457	1	20		PRG4	0	1	20		PPP2R4	0	1	20		PODXL	0.0264901	1	20
	VGLL3	0.147059	0.000639359	21		ZFP36L1	0.0129702	0	21		PRG4	0	1	21		CASP8	0.0446429	0.60247	21		PRB2	0.0241935	1	21		TGFBR2	0.0326797	0.533666	21		PPP2R1A	0	1	21		PROM1	0.0176471	1	21		PPP6C	0	1	21		PLEKHG5	0.0331126	1	21
	LRP10	0.205882	0.000639359	22		PPP2R4	0.00518807	0	22		PROM1	0	1	22		PRG4	0.0267857	1	22		PRG4	0.0524194	1	22		PODXL	0.0261438	0.704203	22		PPP2R4	0	1	22		PPP2R4	0.00588235	1	22		PRB2	0.00434783	1	22		PRB2	0.013245	1	22
	TSPAN4	0.176471	0.000639359	23		MLL3	0.0674449	4.5524e-13	23		PRB2	0	1	23		PROM1	0.0133929	1	23		PROM1	0.0362903	1	23		PRB2	0.0326797	1	23		RPL22	0.00343643	1	23		PTTG1IP	0.00588235	1	23		PRG4	0.0478261	1	23		PRG4	0.0596026	1	23
	MDFI	0.117647	0.000639359	24		TP53	0.329442	1.74509e-12	24		PTEN	0	1	24		PTMS	0.00892857	1	24		NAP1L5	0.016129	1	24		PPP6C	0	1	24		PPP6C	0	1	24		PTPN11	0.0235294	1	24		PROM1	0.0173913	1	24		PROM1	0.00662252	1	24
	UTP3	0.176471	0.000721275	25		PIK3CA	0.337224	7.20371e-12	25		PPP6C	0	1	25		PRB2	0.00446429	1	25		PTMS	0.0120968	1	25		PROM1	0.00653595	1	25		REV1	0.00687285	1	25		RPTN	0.0294118	1	25		PTEN	0.0304348	1	25		A1CF	0.0463576	1	25
	UVRAG	0.147059	0.000743411	26		RUNX1	0.0324254	4.9441e-09	26		A1CF	0	1	26		PTPN11	0.0223214	1	26		PTPN11	0.0282258	1	26		PTEN	0.0163399	1	26		RASA1	0	1	26		RPL5	0.00588235	1	26		PTMS	0	1	26		PTMS	0	1	26
	PTTG1IP	0.147059	0.000778602	27		NCOR1	0.0402075	2.81444e-06	27		PPM1D	0	1	27		PPP6C	0.0133929	1	27		PTTG1IP	0.016129	1	27		PTMS	0	1	27		PROM1	0	1	27		RPL22	0	1	27		PTPN11	0.026087	1	27		PTPN11	0.0264901	1	27
	TSNARE1	0.176471	0.000940647	28		CTCF	0.0233463	0.00324977	28		PTTG1IP	0	1	28		PTTG1IP	0	1	28		RAD21	0.0403226	1	28		PTPN11	0.00326797	1	28		RNF14	0	1	28		RNF43	0.0117647	1	28		PTTG1IP	0	1	28		RAD21	0.0198675	1	28
	FADS2	0.147059	0.00108244	29		FOXA1	0.0194553	0.0181534	29		RANGAP1	0	1	29		A1CF	0.0178571	1	29		MYH9	0.0645161	1	29		PRG4	0.0294118	1	29		PTMS	0	1	29		RNF14	0.0117647	1	29		RAD21	0.0304348	1	29		RANGAP1	0.0198675	1	29
	AADACL3	0.147059	0.00143849	30		KRAS	0.0077821	0.0496697	30		RASA1	0	1	30		REV1	0.0223214	1	30		MYC	0.0322581	1	30		NF2	0.0130719	1	30		PTPN11	0.0171821	1	30		RIMS2	0.0117647	1	30		PLEKHG5	0.0217391	1	30		RASA1	0.0662252	1	30
	MAGEA10	0.147059	0.00193955	31		MYB	0.0142672	0.0608669	31		RB1	0	1	31		RANGAP1	0.00446429	1	31		RASA1	0.0887097	1	31		PPP2R4	0.00326797	1	31		PTTG1IP	0	1	31		PTMS	0	1	31		RPL22	0.00434783	1	31		RB1	0.0529801	1	31
	HOXB2	0.176471	0.00193955	32		HIST1H3B	0.00907912	0.0802128	32		REV1	0	1	32		RASA1	0.0267857	1	32		REV1	0.0403226	1	32		RANGAP1	0.0130719	1	32		RIMS2	0.0412371	1	32		RHOA	0	1	32		RANGAP1	0.0130435	1	32		REV1	0.0331126	1	32
	KIAA0907	0.264706	0.00203117	33		NLRP6	0	1	33		RFC4	0	1	33		RB1	0.0223214	1	33		RFC4	0.016129	1	33		REV1	0.00326797	1	33		RHOA	0	1	33		REV1	0.00588235	1	33		RASA1	0.0130435	1	33		RFC4	0.00662252	1	33
	ZNF185	0.147059	0.00206234	34		NHP2	0.00129702	1	34		RHOA	0	1	34		PPP2R4	0	1	34		RHOA	0.0120968	1	34		RFC4	0.00980392	1	34		RAD21	0.00343643	1	34		RB1	0.0235294	1	34		RNF43	0.0304348	1	34		RIMS2	0.125828	1	34
	TMEM127	0.117647	0.00282854	35		PTMS	0.00129702	1	35		RIMS2	0	1	35		RFC4	0.00892857	1	35		MYB	0.0282258	1	35		RHOA	0.0130719	1	35		RANGAP1	0.00687285	1	35		RASA1	0.0176471	1	35		RNF14	0.0130435	1	35		RNF14	0.013245	1	35
	KRTAP4-1	0.117647	0.00307802	36		PTPN11	0.00129702	1	36		RNF14	0	1	36		RHOA	0.0223214	1	36		RIMS2	0.0846774	1	36		RIMS2	0.0522876	1	36		RFC4	0.00343643	1	36		RANGAP1	0	1	36		REV1	0.0173913	1	36		RPL5	0.013245	1	36
	MYC	0.147059	0.00323456	37		PTTG1IP	0	1	37		RNF43	0	1	37		RIMS2	0.0580357	1	37		RNF14	0.016129	1	37		RNF14	0.0130719	1	37		PRG4	0.0103093	1	37		RAD21	0.00588235	1	37		RHOA	0.00434783	1	37		RPTN	0.013245	1	37
	GSX1	0.117647	0.00334862	38		RAD21	0.00518807	1	38		RPL22	0	1	38		RNF14	0.00892857	1	38		RNF43	0.0483871	1	38		RNF43	0.00326797	1	38		RNF43	0.00687285	1	38		PPM1D	0.00588235	1	38		A1CF	0.0304348	1	38		PTEN	0.0463576	1	38
	ATP6V1C2	0.117647	0.00394284	39		RANGAP1	0.00259403	1	39		RPL5	0	1	39		RNF43	0.0446429	1	39		MUC7	0.0322581	1	39		RPL22	0.00653595	1	39		PCDH11Y	0.024055	1	39		RFC4	0.00588235	1	39		PHF6	0.00869565	1	39		PTTG1IP	0.013245	1	39
	OR10A2	0.147059	0.00505827	40		NFE2L2	0.00129702	1	40		PTMS	0	1	40		RPL22	0.00892857	1	40		RPL5	0.0282258	1	40		RPL5	0	1	40		PCP4L1	0.00343643	1	40		POP5	0	1	40		PIK3CA	0.0478261	1	40		PCDH11Y	0.00662252	1	40
	TMEM48	0.147059	0.00544185	41		RASA1	0.00259403	1	41		POP5	0	1	41		RPL5	0.00446429	1	41		RPTN	0.0241935	1	41		RPTN	0.0130719	1	41		MORC4	0.00343643	1	41		A1CF	0.00588235	1	41		MSMB	0.00869565	1	41		PHF6	0.013245	1	41
	ZNF844	0.235294	0.00544185	42		NF2	0.00389105	1	42		PCP4L1	0	1	42		RPTN	0	1	42		RRP8	0.0201613	1	42		RRP8	0.00653595	1	42		MSMB	0	1	42		PLEKHG5	0.00588235	1	42		MT1H	0	1	42		MT1H	0	1	42
	CD99L2	0.117647	0.0054822	43		NF1	0.0246433	1	43		PLEKHG5	0	1	43		RRP8	0.00892857	1	43		MT1H	0	1	43		RUNX1	0.00653595	1	43		MT1H	0	1	43		MT1H	0	1	43		MYB	0.00869565	1	43		MUC7	0.0198675	1	43
	NOS1AP	0.147059	0.0054822	44		REV1	0.00259403	1	44		MT1H	0	1	44		RAD21	0.0267857	1	44		RANGAP1	0.0120968	1	44		PTTG1IP	0	1	44		MUC7	0.00343643	1	44		MYB	0.0117647	1	44		MYC	0	1	44		MYB	0.0198675	1	44
	ZMIZ1	0.147059	0.0054822	45		NEFH	0.00129702	1	45		MUC7	0	1	45		PPP2R1A	0.0223214	1	45		PPP6C	0.0201613	1	45		RAD21	0.00980392	1	45		MYB	0.00343643	1	45		MYC	0	1	45		MYH9	0.0347826	1	45		MYC	0	1	45
	NLRP6	0.176471	0.00737182	46		NAP1L5	0	1	46		MYB	0.00510204	1	46		PIK3CA	0.200893	1	46		PPP2R4	0.0201613	1	46		PPM1D	0.00653595	1	46		MYC	0.00343643	1	46		MYH9	0	1	46		NAP1L5	0.00869565	1	46		MYH9	0.0860927	1	46
	FTSJ3	0.147059	0.00737182	47		RFC4	0.00259403	1	47		MYC	0.00510204	1	47		POP5	0.00446429	1	47		NCOR1	0.0564516	1	47		PPP2R1A	0.0130719	1	47		MYH9	0.0103093	1	47		NAP1L5	0.00588235	1	47		NCOR1	0.0304348	1	47		NAP1L5	0	1	47
	APBB1	0.147059	0.00737182	48		RHOA	0.00259403	1	48		MYH9	0	1	48		MYB	0.0133929	1	48		NOB1	0.00806452	1	48		NHP2	0.00326797	1	48		NAP1L5	0.00687285	1	48		NCOR1	0.0176471	1	48		NEFH	0.0173913	1	48		NCOR1	0.0794702	1	48
	NOB1	0.117647	0.00737182	49		RIMS2	0.0116732	1	49		NAP1L5	0	1	49		MYC	0	1	49		NOS1AP	0.0241935	1	49		NLRP6	0.0130719	1	49		NCOR1	0.00687285	1	49		NEFH	0.00588235	1	49		NF1	0.117391	1	49		NEFH	0.0198675	1	49
	CRIPAK	0.147059	0.00737182	50		RNF14	0.00259403	1	50		NCOR1	0	1	50		MYH9	0.0491071	1	50		NOTCH1	0.0322581	1	50		NOB1	0.00653595	1	50		NEFH	0.00687285	1	50		NF1	0.0647059	1	50		NF2	0.00869565	1	50		NF1	0.0662252	1	50
	FOXD4	0.117647	0.00737182	51		RNF43	0.00259403	1	51		NEFH	0	1	51		NAP1L5	0	1	51		NFE2L2	0.0564516	1	51		NOS1AP	0.00653595	1	51		NF2	0	1	51		NF2	0.0117647	1	51		NFE2L2	0.0217391	1	51		NF2	0.0198675	1	51
	COQ9	0.117647	0.00737182	52		RPL22	0	1	52		NF1	0.0102041	1	52		NCOR1	0.0401786	1	52		NPM1	0.0120968	1	52		NEFH	0.00980392	1	52		NFE2L2	0	1	52		NFE2L2	0	1	52		NHP2	0	1	52		NFE2L2	0.0198675	1	52
	CYP51A1	0.117647	0.00809328	53		MYH9	0.0103761	1	53		NF2	0	1	53		NEFH	0.0133929	1	53		NPPA	0.00806452	1	53		NPM1	0.00326797	1	53		NHP2	0	1	53		NHP2	0	1	53		NLRP6	0.0173913	1	53		NHP2	0.0198675	1	53
	HRCT1	0.0882353	0.00809328	54		NOB1	0.00129702	1	54		NFE2L2	0	1	54		NF1	0.0357143	1	54		NPRL2	0.0201613	1	54		NPPA	0.00326797	1	54		NLRP6	0.00343643	1	54		NLRP6	0.0176471	1	54		NOB1	0	1	54		NLRP6	0.0198675	1	54
	C16orf62	0.176471	0.00898693	55		NOS1AP	0.00259403	1	55		NHP2	0	1	55		NF2	0.0178571	1	55		NRAS	0.0362903	1	55		NPRL2	0	1	55		NOB1	0.00343643	1	55		NOB1	0.0117647	1	55		NOS1AP	0.0173913	1	55		NOB1	0.0264901	1	55
	SCD	0.117647	0.0092654	56		PASD1	0.00389105	1	56		NLRP6	0	1	56		NFE2L2	0.00892857	1	56		NSD1	0.0967742	1	56		NRAS	0.00326797	1	56		NOS1AP	0.00343643	1	56		NOS1AP	0.00588235	1	56		NOTCH1	0.0347826	1	56		NOS1AP	0.00662252	1	56
	ERC2	0.176471	0.0092654	57		PRG4	0.00259403	1	57		PODXL	0	1	57		NHP2	0	1	57		ODF1	0.0201613	1	57		NCOR1	0.0326797	1	57		NOTCH1	0	1	57		NPM1	0.00588235	1	57		NPM1	0.00869565	1	57		NOTCH1	0.0927152	1	57
	TTBK2	0.176471	0.0092654	58		OR10A5	0	1	58		NOB1	0	1	58		NLRP6	0.00446429	1	58		OR10A2	0.00806452	1	58		ODF1	0.00980392	1	58		NPM1	0.00343643	1	58		NPPA	0	1	58		NPPA	0.00434783	1	58		NPM1	0	1	58
	ARFGAP3	0.147059	0.00964417	59		OR10A2	0.00259403	1	59		NOTCH1	0.00510204	1	59		NOB1	0	1	59		OR10A5	0.0282258	1	59		OR10A2	0.0130719	1	59		NPPA	0.00343643	1	59		NPRL2	0.00588235	1	59		NPRL2	0.00434783	1	59		NPPA	0.0264901	1	59
	BZRAP1	0.205882	0.0110255	60		PBRM1	0.00518807	1	60		NPPA	0	1	60		NOS1AP	0.0223214	1	60		OR10A7	0.0201613	1	60		OR10A5	0.00653595	1	60		NPRL2	0.00687285	1	60		NRAS	0.00588235	1	60		NRAS	0.0173913	1	60		NPRL2	0.0198675	1	60
	ZNF479	0.205882	0.0113903	61		PCDH11Y	0	1	61		NPRL2	0	1	61		NOTCH1	0	1	61		PASD1	0.0685484	1	61		OR10A7	0.0163399	1	61		NRAS	0.00343643	1	61		NSD1	0.00588235	1	61		NSD1	0.0347826	1	61		NRAS	0.00662252	1	61
	GABRG1	0.117647	0.0113903	62		ODF1	0.00259403	1	62		NSD1	0	1	62		PPM1D	0.0178571	1	62		PBRM1	0.0443548	1	62		PASD1	0.0163399	1	62		NSD1	0.00343643	1	62		ODF1	0	1	62		OR10A2	0.0391304	1	62		NSD1	0.0662252	1	62
	HOXA11	0.117647	0.0142909	63		NSD1	0.00259403	1	63		ODF1	0	1	63		NPM1	0.00446429	1	63		PCDH11Y	0	1	63		PBRM1	0.0261438	1	63		ODF1	0	1	63		OR10A2	0	1	63		OR10A5	0.0347826	1	63		ODF1	0.0264901	1	63
	C22orf32	0.0882353	0.0143377	64		PCP4L1	0	1	64		OR10A2	0	1	64		NPRL2	0	1	64		NF2	0.0282258	1	64		PCDH11Y	0.00980392	1	64		OR10A2	0	1	64		OR10A5	0.00588235	1	64		OR10A7	0.0173913	1	64		OR10A2	0.013245	1	64
	CXXC4	0.0882353	0.0143377	65		PHF6	0.00389105	1	65		OR10A5	0	1	65		NSD1	0.0357143	1	65		PCP4L1	0	1	65		NAP1L5	0.00980392	1	65		OR10A5	0	1	65		OR10A7	0	1	65		PASD1	0.0478261	1	65		OR10A5	0.00662252	1	65
	PLEKHG5	0.176471	0.0143377	66		RPL5	0.00389105	1	66		OR10A7	0	1	66		ODF1	0.0178571	1	66		PHF6	0.0322581	1	66		MYH9	0.0424837	1	66		OR10A7	0	1	66		PASD1	0	1	66		PBRM1	0.0217391	1	66		OR10A7	0.00662252	1	66
	NAP1L5	0.0882353	0.0160247	67		NRAS	0.00129702	1	67		PASD1	0	1	67		OR10A2	0.00892857	1	67		NF1	0.0806452	1	67		PCP4L1	0	1	67		PASD1	0.0171821	1	67		PBRM1	0.0294118	1	67		PCDH11Y	0.0304348	1	67		PASD1	0.0397351	1	67
	PROM1	0.117647	0.019227	68		NPRL2	0	1	68		PBRM1	0	1	68		OR10A5	0	1	68		NEFH	0.0282258	1	68		PHF6	0.00326797	1	68		PBRM1	0.00687285	1	68		PCDH11Y	0.0117647	1	68		PCP4L1	0	1	68		PBRM1	0.0860927	1	68
	CBL	0.117647	0.019227	69		NPPA	0.00129702	1	69		PCDH11Y	0	1	69		OR10A7	0	1	69		PLEKHG5	0.016129	1	69		MYC	0.0130719	1	69		RRP8	0.00343643	1	69		PCP4L1	0	1	69		RRP8	0.00434783	1	69		RRP8	0.0264901	1	69
	CANX	0.117647	0.0198456	70		NPM1	0	1	70		PIK3CA	0	1	70		PASD1	0.00892857	1	70		PODXL	0.0120968	1	70		PLEKHG5	0.0130719	1	70		PHF6	0.00343643	1	70		PHF6	0.00588235	1	70		PIK3R1	0.0130435	1	70		PCP4L1	0	1	70
	FXR2	0.147059	0.0204323	71		PLEKHG5	0.00129702	1	71		PIK3R1	0	1	71		PBRM1	0.0223214	1	71		POP5	0.00806452	1	71		POP5	0.00326797	1	71		RUNX1	0	1	71		RRP8	0	1	71		RUNX1	0.00434783	1	71		PIK3R1	0.0596026	1	71
	MYH9	0.176471	0.0215581	72		PODXL	0	1	72		NOS1AP	0	1	72		PCDH11Y	0.0178571	1	72		PPM1D	0.0443548	1	72		NF1	0.0294118	1	72		A1CF	0.0103093	1	72		PODXL	0.0235294	1	72		SEMG1	0.026087	1	72		RUNX1	0.0198675	1	72
	HHATL	0.117647	0.0215581	73		POP5	0.00129702	1	73		RPTN	0	1	73		PCP4L1	0.00446429	1	73		NHP2	0.00806452	1	73		MYB	0.00326797	1	73		SEC63	0.00687285	1	73		RUNX1	0	1	73		SEC63	0.026087	1	73		SETD2	0.0264901	1	73
	DDX10	0.117647	0.0223075	74		PPM1D	0.00259403	1	74		SEC63	0	1	74		PHF6	0.00446429	1	74		RUNX1	0.0362903	1	74		PIK3R1	0.0196078	1	74		TOX	0	1	74		SETD2	0.0294118	1	74		TP53INP1	0.00434783	1	74		SEC63	0.0331126	1	74
	GAL3ST2	0.117647	0.0257434	75		PPP2R1A	0.00129702	1	75		SCD	0	1	75		PIK3R1	0.0401786	1	75		A1CF	0.0201613	1	75		A1CF	0.00980392	1	75		TP53INP1	0.00343643	1	75		SEC63	0.00588235	1	75		TPTE2	0.026087	1	75		TOX	0.013245	1	75
	CXXC1	0.147059	0.0260605	76		NOTCH1	0.00518807	1	76		TNFAIP6	0	1	76		PLEKHG5	0	1	76		SEC63	0.0322581	1	76		SEC63	0.00326797	1	76		TREML2	0.0137457	1	76		TP53INP1	0	1	76		TREML2	0.0217391	1	76		TP53INP1	0.013245	1	76
	TP53INP1	0.0882353	0.02635	77		PPP6C	0	1	77		TOX	0	1	77		PODXL	0.0133929	1	77		TP53INP1	0.00806452	1	77		TNFAIP6	0.00980392	1	77		TSNARE1	0.00343643	1	77		TPTE2	0.0117647	1	77		TSNARE1	0.00434783	1	77		TPTE2	0.0331126	1	77
	BIK	0.0882353	0.0285241	78		PRB2	0.00518807	1	78		TP53INP1	0	1	78		NPPA	0.00446429	1	78		TPTE2	0.0483871	1	78		TOX	0.0130719	1	78		TSPAN4	0	1	78		TREML2	0.0117647	1	78		TSPAN4	0	1	78		TREML2	0.013245	1	78
	FOXP1	0.117647	0.0329979	79		OR10A7	0.00129702	1	79		TPTE2	0.00510204	1	79		RUNX1	0.0133929	1	79		TREML2	0.0120968	1	79		TP53INP1	0	1	79		TTBK2	0	1	79		TSNARE1	0.0176471	1	79		TTBK2	0.00869565	1	79		TSNARE1	0.0596026	1	79
	A1CF	0.117647	0.0333118	80		PROM1	0.00389105	1	80		TREML2	0	1	80		SLAMF7	0.00892857	1	80		TSNARE1	0.0120968	1	80		TPTE2	0.00980392	1	80		TULP1	0.00687285	1	80		TSPAN4	0.00588235	1	80		TULP1	0.00434783	1	80		TSPAN4	0.013245	1	80
	HAUS1	0.0882353	0.0344044	81		A1CF	0.00129702	1	81		TSNARE1	0	1	81		SEMG1	0.0133929	1	81		TSPAN4	0.00806452	1	81		TREML2	0.00980392	1	81		TXLNG	0	1	81		TTBK2	0.0117647	1	81		TXLNG	0.00434783	1	81		TTBK2	0.0264901	1	81
	TOX	0.117647	0.0353687	82		RRP8	0	1	82		TSPAN4	0	1	82		TREML2	0.00446429	1	82		TTBK2	0.0282258	1	82		TSNARE1	0.00326797	1	82		U2AF1	0	1	82		TULP1	0.00588235	1	82		U2AF1	0.026087	1	82		TULP1	0.0264901	1	82
	STAU2	0.117647	0.0355263	83		TP53INP1	0	1	83		TTBK2	0	1	83		TSNARE1	0.00446429	1	83		TULP1	0.0201613	1	83		TSPAN4	0	1	83		UPF3A	0	1	83		TXLNG	0	1	83		UPF3A	0.00434783	1	83		TXLNG	0.0264901	1	83
	CDC42EP4	0.0882353	0.0366296	84		TPTE2	0.00389105	1	84		TULP1	0	1	84		TSPAN4	0	1	84		TXLNG	0.0322581	1	84		TTBK2	0.00653595	1	84		UTP3	0.00343643	1	84		U2AF1	0.00588235	1	84		UTP3	0	1	84		U2AF1	0.013245	1	84
	LILRB1	0.147059	0.0392396	85		TREML2	0.00129702	1	85		TXLNG	0	1	85		TTBK2	0.0223214	1	85		U2AF1	0.016129	1	85		TULP1	0.00653595	1	85		UVRAG	0.0103093	1	85		UPF3A	0	1	85		UVRAG	0.0217391	1	85		UTP3	0.00662252	1	85
	THBS4	0.147059	0.0446834	86		TSNARE1	0.00518807	1	86		UPF3A	0	1	86		TULP1	0	1	86		UPF3A	0.0241935	1	86		TXLNG	0	1	86		VAMP3	0.00343643	1	86		UTP3	0	1	86		VAMP3	0	1	86		UVRAG	0.0463576	1	86
	SFTPC	0.0882353	0.0465009	87		TSPAN4	0	1	87		UTP3	0	1	87		TXLNG	0.0223214	1	87		UTP3	0.0241935	1	87		U2AF1	0.0130719	1	87		VEGFB	0.00343643	1	87		UVRAG	0.00588235	1	87		VEGFB	0	1	87		VAMP3	0	1	87
	CPLX3	0.0588235	0.0465009	88		TTBK2	0.00129702	1	88		UVRAG	0	1	88		U2AF1	0.00892857	1	88		UVRAG	0.0403226	1	88		UPF3A	0.00326797	1	88		VGLL3	0	1	88		VAMP3	0	1	88		VGLL3	0.0217391	1	88		VEGFB	0	1	88
	OR10A5	0.117647	0.0465009	89		TULP1	0.00129702	1	89		VAMP3	0	1	89		UPF3A	0.00892857	1	89		VAMP3	0.00403226	1	89		UTP3	0	1	89		VHL	0	1	89		VEGFB	0.00588235	1	89		VHL	0.00434783	1	89		VGLL3	0.0198675	1	89
	RANGAP1	0.117647	0.0531207	90		TXLNG	0.00129702	1	90		VEGFB	0	1	90		UTP3	0.00892857	1	90		VEGFB	0.00806452	1	90		UVRAG	0.00653595	1	90		VPS33B	0	1	90		VGLL3	0.00588235	1	90		VPS33B	0.0130435	1	90		VHL	0	1	90
	DTX2	0.117647	0.0531207	91		U2AF1	0.00259403	1	91		VGLL3	0	1	91		UVRAG	0.00892857	1	91		VGLL3	0.016129	1	91		TMEM48	0.00980392	1	91		WSB2	0.00343643	1	91		VHL	0	1	91		WSB2	0.00434783	1	91		VPS33B	0.013245	1	91
	VPS33B	0.117647	0.0531207	92		UPF3A	0.00129702	1	92		VHL	0	1	92		VAMP3	0.00892857	1	92		VHL	0.0120968	1	92		VAMP3	0	1	92		WT1	0.00687285	1	92		VPS33B	0	1	92		WT1	0.0347826	1	92		WSB2	0.0331126	1	92
	RRP8	0.0882353	0.0531207	93		UTP3	0.00259403	1	93		VPS33B	0	1	93		VEGFB	0.00892857	1	93		VPS33B	0.0322581	1	93		VGLL3	0	1	93		ZC3H11A	0	1	93		WSB2	0.00588235	1	93		ZC3H11A	0.0347826	1	93		WT1	0.013245	1	93
	DPPA4	0.117647	0.0542371	94		UVRAG	0.00129702	1	94		WSB2	0	1	94		VGLL3	0.00446429	1	94		WSB2	0.0120968	1	94		VHL	0	1	94		ZFP36L1	0.00343643	1	94		WT1	0.00588235	1	94		ZFP36L1	0.0130435	1	94		ZC3H11A	0.0331126	1	94
	FOXN3	0.117647	0.0542371	95		VAMP3	0.00129702	1	95		ZC3H11A	0	1	95		VHL	0.00446429	1	95		WT1	0.0120968	1	95		VPS33B	0.0163399	1	95		ZMIZ1	0.0137457	1	95		ZC3H11A	0.00588235	1	95		ZMIZ1	0.026087	1	95		ZFP36L1	0	1	95
	HTATSF1	0.147059	0.0550841	96		TOX	0.00259403	1	96		ZFP36L1	0	1	96		VPS33B	0.00892857	1	96		ZC3H11A	0.0241935	1	96		WSB2	0.00653595	1	96		ZNF185	0	1	96		ZFP36L1	0.00588235	1	96		ZNF185	0.00434783	1	96		ZMIZ1	0.0463576	1	96
	TPTE2	0.117647	0.0550841	97		VEGFB	0	1	97		ZMIZ1	0	1	97		WSB2	0.00446429	1	97		ZFP36L1	0.00403226	1	97		WT1	0	1	97		ZNF479	0.00687285	1	97		ZMIZ1	0.0176471	1	97		ZNF479	0.0695652	1	97		ZNF185	0.0264901	1	97
	REV1	0.147059	0.0550841	98		VHL	0	1	98		ZNF185	0	1	98		WT1	0.0267857	1	98		ZMIZ1	0.0322581	1	98		ZC3H11A	0.00980392	1	98		ZNF492	0.0137457	1	98		ZNF185	0	1	98		ZNF492	0.0521739	1	98		ZNF479	0.0198675	1	98
	SFMBT2	0.117647	0.0605378	99		VPS33B	0.00389105	1	99		ZNF479	0	1	99		ZC3H11A	0.0223214	1	99		ZNF185	0.0241935	1	99		ZFP36L1	0.00980392	1	99		ZNF513	0.00343643	1	99		ZNF479	0.0176471	1	99		ZNF513	0.0130435	1	99		ZNF492	0.0264901	1	99
	INTS7	0.117647	0.0612284	100		WSB2	0.00129702	1	100		ZNF492	0	1	100		ZFP36L1	0.00446429	1	100		ZNF479	0.0483871	1	100		ZMIZ1	0	1	100		ZNF609	0.00343643	1	100		ZNF492	0.0117647	1	100		ZNF609	0.0130435	1	100		ZNF513	0.0198675	1	100
	C10orf82	0.0588235	0.0674689	101		WT1	0.00259403	1	101		ZNF513	0	1	101		ZMIZ1	0.0133929	1	101		ZNF492	0.0403226	1	101		ZNF185	0.00326797	1	101		ZNF750	0	1	101		ZNF513	0	1	101		ZNF750	0.00434783	1	101		ZNF609	0.0529801	1	101
	TMCO2	0.0588235	0.0676837	102		ZC3H11A	0.00518807	1	102		ZNF609	0	1	102		ZNF185	0.0133929	1	102		ZNF513	0.0201613	1	102		ZNF479	0.0294118	1	102		ZNF781	0	1	102		ZNF609	0.0117647	1	102		ZNF781	0.0173913	1	102		ZNF750	0.0198675	1	102
	HAMP	0.0588235	0.0678848	103		ZMIZ1	0.00518807	1	103		ZNF750	0	1	103		ZNF479	0.0357143	1	103		ZNF609	0.0362903	1	103		ZNF492	0.00653595	1	103		TNFAIP6	0	1	103		ZNF750	0.00588235	1	103		TOX	0.0130435	1	103		ZNF781	0.00662252	1	103
	ZC3H11A	0.147059	0.0678848	104		ZNF185	0.00129702	1	104		ZNF781	0	1	104		ZNF492	0.0267857	1	104		ZNF750	0.0241935	1	104		ZNF513	0.0163399	1	104		TMEM48	0	1	104		ZNF781	0	1	104		TNFAIP6	0.00434783	1	104		TNFAIP6	0.00662252	1	104
	TULP1	0.117647	0.0700569	105		ZNF479	0.00129702	1	105		TMEM48	0	1	105		ZNF513	0.00892857	1	105		ZNF781	0.0403226	1	105		ZNF609	0.0130719	1	105		TMEM30B	0	1	105		TOX	0.00588235	1	105		TMEM48	0.00434783	1	105		TMEM48	0.00662252	1	105
	VEGFB	0.0882353	0.0712383	106		ZNF492	0.00518807	1	106		RRP8	0	1	106		ZNF609	0.0357143	1	106		TOX	0.0443548	1	106		ZNF781	0	1	106		TMEM127	0	1	106		TNFAIP6	0.00588235	1	106		TMEM30B	0	1	106		TMEM30B	0	1	106
	LRCH1	0.147059	0.0789443	107		ZNF513	0.00129702	1	107		TMEM30B	0	1	107		ZNF750	0.00892857	1	107		TMEM48	0.0201613	1	107		VEGFB	0	1	107		MLL3	0.0343643	1	107		TMEM48	0.00588235	1	107		MORC4	0.00869565	1	107		TMEM127	0.00662252	1	107
	CLSTN1	0.117647	0.0789443	108		ZNF609	0.00518807	1	108		TMED10	0	1	108		ZNF781	0.0267857	1	108		TMEM30B	0.00403226	1	108		SCD	0.00326797	1	108		SETD2	0.0171821	1	108		TMEM30B	0	1	108		SETD2	0.0826087	1	108		SEMG1	0.013245	1	108
	TXLNG	0.0882353	0.0830016	109		ZNF750	0.00129702	1	109		MSMB	0	1	109		TPTE2	0.03125	1	109		TMEM127	0.0120968	1	109		TMEM30B	0	1	109		SFMBT2	0	1	109		SEMG1	0.00588235	1	109		SFMBT2	0.0434783	1	109		MSMB	0	1	109
	PRG4	0.205882	0.0881102	110		ZNF781	0.00259403	1	110		SEMG1	0	1	110		TP53INP1	0.00892857	1	110		SEMG1	0.0120968	1	110		TMED10	0.00653595	1	110		SFTPC	0.00687285	1	110		MSMB	0	1	110		SFTPC	0.00434783	1	110		SFMBT2	0.0331126	1	110
	ZNF609	0.147059	0.0908488	111		VGLL3	0.00259403	1	111		SETD2	0.00510204	1	111		TOX	0.0357143	1	111		SETD2	0.0887097	1	111		SEMG1	0.00980392	1	111		SLAMF7	0.00343643	1	111		SFMBT2	0.0117647	1	111		SLAMF7	0.00434783	1	111		SFTPC	0	1	111
	FLT3LG	0.117647	0.0912209	112		RPTN	0.0103761	1	112		SFMBT2	0	1	112		TNFAIP6	0.00892857	1	112		MSMB	0.00806452	1	112		SETD2	0.0228758	1	112		SLC22A14	0	1	112		SFTPC	0.00588235	1	112		SLC22A14	0.00434783	1	112		SLAMF7	0.0264901	1	112
	TCP10L	0.0882353	0.0926044	113		TNFAIP6	0.00129702	1	113		SFTPC	0	1	113		SETD2	0.0580357	1	113		SFTPC	0	1	113		MUC7	0.0130719	1	113		SMAD2	0	1	113		SLAMF7	0	1	113		SMAD2	0.00869565	1	113		SLC22A14	0.013245	1	113
	GRM1	0.147059	0.0946859	114		TMEM127	0.00129702	1	114		SLAMF7	0.00510204	1	114		SFMBT2	0.0625	1	114		SLAMF7	0.016129	1	114		SFMBT2	0.0261438	1	114		SMAD4	0.00343643	1	114		SLC22A14	0	1	114		SMAD4	0.0347826	1	114		SMAD2	0.0463576	1	114
	TIMD4	0.0588235	0.563665	115		SCD	0.00129702	1	115		SLC22A14	0	1	115		SFTPC	0.00446429	1	115		SLC22A14	0.0120968	1	115		SFTPC	0.00653595	1	115		SOX9	0.0103093	1	115		SMAD2	0.0117647	1	115		SOX9	0.0130435	1	115		SOX9	0.0264901	1	115
	EEF1B2	0.0588235	0.646287	116		SEC63	0.00259403	1	116		SMAD2	0	1	116		MUC7	0.0178571	1	116		SMAD2	0.0322581	1	116		SLAMF7	0	1	116		SPOP	0	1	116		SMAD4	0	1	116		SPOP	0.00434783	1	116		SPOP	0.0198675	1	116
	ZNF799	0.205882	0.655923	117		SEMG1	0.00389105	1	117		SMAD4	0	1	117		SLC22A14	0.0178571	1	117		SMAD4	0.0201613	1	117		SLC22A14	0.0130719	1	117		SPRR3	0	1	117		SOX9	0	1	117		STAG2	0.0304348	1	117		SPRR3	0	1	117
	MUC7	0.117647	0.674858	118		SETD2	0.0142672	1	118		SOX9	0	1	118		SPOP	0.00892857	1	118		SOX9	0.0201613	1	118		SMAD2	0.00980392	1	118		STAU2	0	1	118		SPOP	0.0117647	1	118		STAU2	0.00434783	1	118		STAG2	0.0198675	1	118
	CASP5	0	1	119		SFMBT2	0.0077821	1	119		SPOP	0	1	119		SPRR3	0.00892857	1	119		SPRR3	0.00806452	1	119		SMAD4	0.0228758	1	119		STK11	0	1	119		SPRR3	0.00588235	1	119		STK31	0.0391304	1	119		STAU2	0.0264901	1	119
	TAS2R43	0	1	120		MYC	0.00129702	1	120		SPRR3	0	1	120		STAG2	0.0267857	1	120		STAG2	0.0806452	1	120		SOX9	0.00653595	1	120		STK31	0.0137457	1	120		STAG2	0.0117647	1	120		TAS2R43	0	1	120		STK11	0	1	120
	STK31	0	1	121		SMAD2	0.00518807	1	121		STAU2	0	1	121		STAU2	0.0133929	1	121		STAU2	0.0201613	1	121		SPOP	0.0130719	1	121		SCD	0	1	121		STAU2	0.00588235	1	121		SCD	0	1	121		STK31	0.013245	1	121
	RAD21	0	1	122		SMAD4	0.00389105	1	122		STK11	0	1	122		STK11	0	1	122		STK11	0.00806452	1	122		SPRR3	0	1	122		TAS2R43	0	1	122		STK11	0	1	122		TBL1XR1	0.0217391	1	122		SCD	0.0198675	1	122
	STK11	0	1	123		SOX9	0.00259403	1	123		STK31	0	1	123		STK31	0.0357143	1	123		STK31	0.0483871	1	123		STAG2	0.00653595	1	123		TBX3	0	1	123		SCD	0.00588235	1	123		TCF12	0.0173913	1	123		TAS2R43	0.00662252	1	123
	RASA1	0	1	124		SPOP	0.00129702	1	124		TAS2R43	0	1	124		TAS2R43	0	1	124		SCD	0.0241935	1	124		STAU2	0.00653595	1	124		TCF12	0.0137457	1	124		STK31	0.0117647	1	124		TCF7L2	0.0130435	1	124		TBX3	0.0397351	1	124
	RB1	0	1	125		SPRR3	0	1	125		TBL1XR1	0	1	125		TBL1XR1	0.0267857	1	125		TAS2R43	0.00403226	1	125		TMEM127	0	1	125		TCF7L2	0.00343643	1	125		TBL1XR1	0.00588235	1	125		TCP10L	0	1	125		TCF12	0.013245	1	125
	STAG2	0	1	126		STAG2	0.0103761	1	126		TBX3	0	1	126		SCD	0.00892857	1	126		TBX3	0.016129	1	126		STK11	0.00326797	1	126		TCP10L	0	1	126		TBX3	0	1	126		TET2	0.0304348	1	126		TCF7L2	0.0331126	1	126
	SPRR3	0	1	127		STAU2	0.00259403	1	127		TCF12	0	1	127		TBX3	0.0178571	1	127		TCF12	0.0282258	1	127		TAS2R43	0.00326797	1	127		TET2	0.00687285	1	127		TCF7L2	0.0117647	1	127		TEX13A	0.0304348	1	127		TCP10L	0.00662252	1	127
	RFC4	0	1	128		TMEM48	0.00259403	1	128		TCF7L2	0	1	128		TCP10L	0	1	128		TCF7L2	0.0362903	1	128		TBL1XR1	0.00980392	1	128		TEX13A	0.00343643	1	128		TCP10L	0	1	128		TG	0.134783	1	128		TET2	0.0463576	1	128
	SPOP	0	1	129		STK11	0.00259403	1	129		TCP10L	0	1	129		TET2	0.0178571	1	129		TCP10L	0.016129	1	129		TBX3	0.00653595	1	129		TG	0.0206186	1	129		TET2	0.0117647	1	129		TGFBR2	0.00869565	1	129		TEX13A	0.0529801	1	129
	SOX9	0	1	130		TAS2R43	0.00259403	1	130		TEX13A	0	1	130		TEX13A	0.0223214	1	130		TET2	0.0524194	1	130		TCF12	0.00653595	1	130		TGFBR2	0.00687285	1	130		TEX13A	0.00588235	1	130		THBS4	0.0217391	1	130		TG	0.119205	1	130
	RIMS2	0.0294118	1	131		TCF12	0.00259403	1	131		TG	0	1	131		TG	0.0714286	1	131		TEX13A	0.0201613	1	131		TCF7L2	0	1	131		THBS4	0.00687285	1	131		TG	0.00588235	1	131		TIMD4	0.0434783	1	131		TGFBR2	0.0463576	1	131
	RNF14	0	1	132		TCF7L2	0.00389105	1	132		TGFBR2	0	1	132		THBS4	0.00892857	1	132		TG	0.104839	1	132		TCP10L	0.00326797	1	132		TIMD4	0.00687285	1	132		TGFBR2	0.00588235	1	132		TLR9	0.026087	1	132		THBS4	0.0264901	1	132
	RNF43	0	1	133		TCP10L	0	1	133		THBS4	0	1	133		TIMD4	0	1	133		TGFBR2	0.0241935	1	133		TET2	0.00653595	1	133		TLR9	0.00687285	1	133		THBS4	0.0117647	1	133		TMCC1	0.0173913	1	133		TIMD4	0.0264901	1	133
	RPL22	0	1	134		TET2	0.00518807	1	134		TIMD4	0	1	134		TLR9	0.0267857	1	134		THBS4	0.0403226	1	134		TEX13A	0.0228758	1	134		TMCC1	0	1	134		TLR9	0.00588235	1	134		TMCO2	0.00869565	1	134		TLR9	0.0397351	1	134
	SMAD2	0	1	135		TEX13A	0.00259403	1	135		TLR9	0	1	135		TMCC1	0.0223214	1	135		TIMD4	0.0201613	1	135		TG	0.0359477	1	135		TMCO2	0	1	135		TMCC1	0.00588235	1	135		TMED10	0.00869565	1	135		TMCC1	0.0198675	1	135
	SLC22A14	0	1	136		TG	0.0129702	1	136		TMCC1	0	1	136		TMCO2	0.0133929	1	136		TLR9	0.0201613	1	136		THBS4	0.0163399	1	136		TMED10	0	1	136		TMCO2	0	1	136		TMEM127	0	1	136		TMCO2	0.00662252	1	136
	SLAMF7	0	1	137		TGFBR2	0.00389105	1	137		TMCO2	0	1	137		TMED10	0.0133929	1	137		TMCC1	0.0120968	1	137		TIMD4	0.00980392	1	137		TBL1XR1	0	1	137		TMED10	0.00588235	1	137		TBX3	0.0434783	1	137		TMED10	0.013245	1	137
	RPL5	0	1	138		THBS4	0.00259403	1	138		TMEM127	0	1	138		TMEM127	0	1	138		TMCO2	0.00806452	1	138		TLR9	0.00326797	1	138		MLL2	0.0171821	1	138		TMEM127	0	1	138		MLL3	0.191304	1	138		TBL1XR1	0.013245	1	138
	RPTN	0.176471	1	139		TIMD4	0.00129702	1	139		MORC4	0	1	139		TMEM30B	0.00446429	1	139		TMED10	0.016129	1	139		TMCC1	0.00980392	1	139		MBD6	0.00343643	1	139		TAS2R43	0	1	139		MBD6	0.0217391	1	139		MORC4	0.0198675	1	139
	SETD2	0.0588235	1	140		TLR9	0.00129702	1	140		MBD6	0	1	140		TMEM48	0.0178571	1	140		TBL1XR1	0.0483871	1	140		TMCO2	0	1	140		ZNF799	0.00343643	1	140		MORC4	0.00588235	1	140		MDFI	0	1	140		MBD6	0.0596026	1	140
	SEMG1	0.0588235	1	141		TMCC1	0.00648508	1	141		MLL2	0.00510204	1	141		TCF12	0.0357143	1	141		SFMBT2	0.0604839	1	141		STK31	0.0163399	1	141		CCND1	0	1	141		MBD6	0.0117647	1	141		CCDC144NL	0.00434783	1	141		MLL2	0.165563	1	141
	RUNX1	0	1	142		TMCO2	0.00129702	1	142		CCDC144NL	0	1	142		MT1H	0	1	142		MBD6	0.0564516	1	142		MT1H	0	1	142		CD300A	0.00687285	1	142		MLL2	0.0176471	1	142		CCND1	0.00869565	1	142		CD5L	0.0264901	1	142
	SEC63	0.0294118	1	143		STK31	0.0116732	1	143		CCND1	0	1	143		MBD6	0.03125	1	143		MLL2	0.133065	1	143		MBD6	0.0228758	1	143		CD5L	0	1	143		CCND1	0.00588235	1	143		CD300A	0.00869565	1	143		CD99L2	0.013245	1	143
	RHOA	0	1	144		SFTPC	0.00259403	1	144		CD300A	0	1	144		MORC4	0.0133929	1	144		CD300A	0.00806452	1	144		MORC4	0.00980392	1	144		CD99L2	0.00343643	1	144		CD300A	0.00588235	1	144		CD99L2	0.0217391	1	144		CDC42EP4	0.013245	1	144
	TBL1XR1	0	1	145		MBD6	0.00648508	1	145		CD5L	0	1	145		CDH1	0.0223214	1	145		CD5L	0.0241935	1	145		CCND1	0.00326797	1	145		CDC42EP4	0.00343643	1	145		CD5L	0.00588235	1	145		CDC42EP4	0.00434783	1	145		CDH1	0.0927152	1	145
	FOXA1	0.0294118	1	146		MT1H	0	1	146		CD99L2	0	1	146		CDKN1A	0.00446429	1	146		CD99L2	0.0201613	1	146		CD300A	0.00326797	1	146		CDH1	0.00343643	1	146		CD99L2	0.0117647	1	146		CDH1	0.0173913	1	146		CDKN1A	0.00662252	1	146
	TCF12	0.0294118	1	147		CD5L	0.00518807	1	147		CDC42EP4	0	1	147		CDKN1B	0.0133929	1	147		CDC42EP4	0.0120968	1	147		CD5L	0.0130719	1	147		CDKN1A	0.00343643	1	147		CDC42EP4	0	1	147		CDKN1A	0.00434783	1	147		CDKN1B	0	1	147
	UPF3A	0	1	148		CD99L2	0	1	148		CDH1	0	1	148		CDKN2A	0.00892857	1	148		CDH1	0.0524194	1	148		CD99L2	0.00326797	1	148		CDKN1B	0.00343643	1	148		CDH1	0.00588235	1	148		CDKN1B	0.0173913	1	148		CDKN2A	0.0397351	1	148
	ARID2	0.0294118	1	149		CDC42EP4	0	1	149		CDKN1A	0	1	149		CEBPA	0	1	149		CDKN1A	0.00403226	1	149		CDC42EP4	0.00653595	1	149		CDKN2A	0.00687285	1	149		CDKN1A	0	1	149		CEBPA	0	1	149		CEBPA	0	1	149
	ARID1A	0.0882353	1	150		CDKN1A	0	1	150		CDKN1B	0	1	150		CHD4	0.0758929	1	150		CDKN1B	0.0282258	1	150		CDH1	0.0130719	1	150		CEBPA	0	1	150		CDKN1B	0.00588235	1	150		CHD4	0.0391304	1	150		CHD4	0.0860927	1	150
	ARHGEF6	0	1	151		CDKN2A	0	1	151		CDKN2A	0	1	151		CIC	0.0223214	1	151		CDKN2A	0.00806452	1	151		CDKN1A	0	1	151		CHD4	0.00343643	1	151		CDKN2A	0.0117647	1	151		CIC	0.0173913	1	151		CIC	0.0728477	1	151
	APC	0	1	152		CEBPA	0	1	152		CHD4	0.0102041	1	152		CLSTN1	0.03125	1	152		CEBPA	0	1	152		CDKN1B	0.00653595	1	152		CIC	0.00343643	1	152		CEBPA	0	1	152		CLSTN1	0.0130435	1	152		CLSTN1	0.013245	1	152
	VHL	0	1	153		CHD4	0.0155642	1	153		CIC	0.00510204	1	153		COL11A1	0.0803571	1	153		CIC	0.0685484	1	153		CEBPA	0	1	153		CLSTN1	0	1	153		CHD4	0.0117647	1	153		COL11A1	0.217391	1	153		COL11A1	0.0993377	1	153
	WSB2	0	1	154		CIC	0.00259403	1	154		CLSTN1	0	1	154		COQ9	0.00892857	1	154		CLSTN1	0.0322581	1	154		CHD4	0.0228758	1	154		COL11A1	0.00687285	1	154		CLSTN1	0.0117647	1	154		COQ9	0.0130435	1	154		COQ9	0.013245	1	154
	U2AF1	0.0294118	1	155		CLSTN1	0.00129702	1	155		COL11A1	0	1	155		CPEB1	0.0133929	1	155		COL11A1	0.100806	1	155		CIC	0.0130719	1	155		COQ9	0.00343643	1	155		COL11A1	0.0176471	1	155		CPEB1	0.0217391	1	155		CPEB1	0.013245	1	155
	WT1	0	1	156		COL11A1	0.00518807	1	156		COQ9	0	1	156		CPLX3	0.00446429	1	156		COQ9	0.0120968	1	156		CLSTN1	0	1	156		CPEB1	0	1	156		COQ9	0	1	156		CPLX3	0	1	156		CPLX3	0	1	156
	AKT1	0.0294118	1	157		COQ9	0.00129702	1	157		CPEB1	0	1	157		CRIPAK	0	1	157		CPEB1	0.0322581	1	157		COL11A1	0.0915033	1	157		CPLX3	0	1	157		CPEB1	0.00588235	1	157		CRIPAK	0.0608696	1	157		CRIPAK	0.0264901	1	157
	AIM2	0	1	158		CPEB1	0.00518807	1	158		CPLX3	0	1	158		CDC42EP4	0.00446429	1	158		CPLX3	0.00403226	1	158		CCDC144NL	0.00653595	1	158		CRIPAK	0.00343643	1	158		CPLX3	0	1	158		CSNK2A1	0	1	158		CSNK2A1	0.0463576	1	158
	ACVR2A	0	1	159		CPLX3	0	1	159		CRIPAK	0	1	159		CSNK2A1	0.0178571	1	159		CRIPAK	0.0120968	1	159		COQ9	0.00326797	1	159		CSNK2A1	0	1	159		CSNK2A1	0.00588235	1	159		CTCF	0.0130435	1	159		CTCF	0.0331126	1	159
	ZNF492	0	1	160		CD300A	0.00518807	1	160		CSNK2A1	0	1	160		CTNNB1	0.0491071	1	160		CSNK2A1	0.0282258	1	160		CPLX3	0	1	160		CTCF	0	1	160		CTCF	0	1	160		CTNNB1	0.0391304	1	160		CTNNB1	0.0596026	1	160
	ZNF513	0	1	161		CRIPAK	0.00259403	1	161		CTCF	0.00510204	1	161		CXXC1	0.00892857	1	161		CXXC1	0.0282258	1	161		CRIPAK	0.00980392	1	161		CTNNB1	0.00343643	1	161		CTNNB1	0	1	161		CXXC1	0.0173913	1	161		CXXC1	0.0463576	1	161
	ZNF750	0	1	162		CTNNB1	0.00129702	1	162		CTNNB1	0	1	162		CXXC4	0.00446429	1	162		CXXC4	0.00403226	1	162		CTNNB1	0.00653595	1	162		CXXC1	0	1	162		CXXC1	0.00588235	1	162		CXXC4	0.0130435	1	162		CXXC4	0.013245	1	162
	ZNF781	0	1	163		CXXC1	0	1	163		CXXC1	0	1	163		CYP51A1	0.00892857	1	163		CYP51A1	0.016129	1	163		CXXC1	0.0196078	1	163		CXXC4	0.00343643	1	163		CXXC4	0.00588235	1	163		CYP51A1	0.00869565	1	163		CYP51A1	0.0198675	1	163
	ZFP36L1	0	1	164		CXXC4	0	1	164		CXXC4	0	1	164		DDX10	0.00446429	1	164		DDX10	0.0403226	1	164		CXXC4	0.00326797	1	164		CYP51A1	0	1	164		CYP51A1	0.00588235	1	164		DDX10	0.0173913	1	164		DDX10	0.0331126	1	164
	TBX3	0	1	165		CYP51A1	0	1	165		CYP51A1	0	1	165		DNMT3A	0.0401786	1	165		DNMT3A	0.0322581	1	165		CYP51A1	0.00326797	1	165		DDX10	0.00343643	1	165		DDX10	0.00588235	1	165		DNMT3A	0.0434783	1	165		DNMT3A	0.0331126	1	165
	ARID5B	0.0294118	1	166		DDX10	0.00129702	1	166		DDX10	0	1	166		DPPA4	0.00446429	1	166		DPPA4	0.0201613	1	166		DDX10	0.00653595	1	166		DNMT3A	0	1	166		DNMT3A	0.00588235	1	166		DPPA4	0.0173913	1	166		DPPA4	0.0529801	1	166
	ATM	0.0294118	1	167		DNMT3A	0.00518807	1	167		DPPA4	0	1	167		DTX2	0.0133929	1	167		DTX2	0.016129	1	167		DNMT3A	0.0228758	1	167		DPPA4	0.0103093	1	167		DPPA4	0.00588235	1	167		DTX2	0.00869565	1	167		DTX2	0.013245	1	167
	TCF7L2	0	1	168		DPPA4	0.00129702	1	168		DTX2	0	1	168		EEF1B2	0.00446429	1	168		EEF1B2	0.0120968	1	168		DPPA4	0.0228758	1	168		DTX2	0.00343643	1	168		DTX2	0.00588235	1	168		EEF1B2	0.0173913	1	168		EEF1B2	0.00662252	1	168
	TET2	0	1	169		DTX2	0.00389105	1	169		EEF1B2	0	1	169		EGFR	0.0446429	1	169		EGFR	0.0322581	1	169		DTX2	0.00326797	1	169		EEF1B2	0	1	169		EEF1B2	0.0117647	1	169		EGFR	0.117391	1	169		EGFR	0.0596026	1	169
	TEX13A	0.0294118	1	170		EEF1B2	0.00129702	1	170		EGFR	0.0102041	1	170		EIF1AX	0	1	170		EIF1AX	0.016129	1	170		EEF1B2	0	1	170		CCDC144NL	0.00343643	1	170		EGFR	0.0470588	1	170		CBX7	0.00434783	1	170		EIF1AX	0.00662252	1	170
	TG	0.0294118	1	171		EGFR	0.00648508	1	171		CBX7	0.00510204	1	171		EIF4A2	0.0223214	1	171		EIF4A2	0.0322581	1	171		EGFR	0.0457516	1	171		CBX7	0	1	171		EIF1AX	0.0117647	1	171		CBWD1	0.00869565	1	171		CD300A	0	1	171
	TGFBR2	0	1	172		EIF1AX	0.00259403	1	172		CBWD1	0	1	172		EIF5A2	0.00446429	1	172		EIF5A2	0.0120968	1	172		EIF1AX	0	1	172		CBWD1	0	1	172		CCDC144NL	0.00588235	1	172		CBL	0.0217391	1	172		CCND1	0.00662252	1	172
	CASP8	0.0294118	1	173		EIF4A2	0.00648508	1	173		CBL	0.0102041	1	173		CTCF	0.0401786	1	173		CCDC144NL	0.016129	1	173		CPEB1	0.0130719	1	173		CBL	0.00343643	1	173		EIF4A2	0	1	173		CBFB	0.00434783	1	173		CCDC144NL	0.0198675	1	173
	TLR9	0	1	174		EIF5A2	0	1	174		CBFB	0.0102041	1	174		CD99L2	0.00446429	1	174		ELF3	0.00806452	1	174		CBX7	0.00980392	1	174		AADACL3	0.00343643	1	174		CBX7	0	1	174		AADACL3	0.0173913	1	174		CBX7	0	1	174
	ARL15	0	1	175		CSNK2A1	0.00129702	1	175		AADACL3	0	1	175		CD5L	0.0178571	1	175		CBX7	0.0120968	1	175		CBWD1	0.00326797	1	175		ACVR2A	0	1	175		CBL	0	1	175		ACVR2A	0.0130435	1	175		AADACL3	0.0198675	1	175
	BRAF	0	1	176		ELF3	0.00129702	1	176		ACVR2A	0	1	176		CD300A	0.0133929	1	176		CBL	0.0443548	1	176		CBL	0.00653595	1	176		ADAD1	0.00343643	1	176		AADACL3	0.00588235	1	176		ADAD1	0.0217391	1	176		ADAD1	0.0264901	1	176
	BIVM	0	1	177		CCND1	0.00129702	1	177		ADAD1	0	1	177		AADACL3	0.00892857	1	177		AADACL3	0.0201613	1	177		AADACL3	0	1	177		AIM2	0.00343643	1	177		ACVR2A	0.00588235	1	177		AIM2	0.0173913	1	177		AIM2	0.013245	1	177
	TMEM30B	0	1	178		CBWD1	0.00259403	1	178		AIM2	0	1	178		ADAD1	0.0267857	1	178		ACVR2A	0.0241935	1	178		ACVR2A	0.00653595	1	178		AKT1	0.00343643	1	178		ADAD1	0	1	178		AKT1	0	1	178		AKT1	0.013245	1	178
	BAP1	0.0294118	1	179		AADACL3	0	1	179		AKT1	0	1	179		AKT1	0.00892857	1	179		ADAD1	0.0524194	1	179		ADAD1	0.00653595	1	179		APBB1	0.00687285	1	179		AIM2	0.00588235	1	179		APBB1	0.0130435	1	179		APBB1	0.0529801	1	179
	TNFAIP6	0	1	180		ACVR2A	0.00518807	1	180		APBB1	0	1	180		APBB1	0.0223214	1	180		AIM2	0.0241935	1	180		AIM2	0.00326797	1	180		APC	0.00343643	1	180		AKT1	0.00588235	1	180		APC	0.0913043	1	180		APC	0.139073	1	180
	B2M	0	1	181		ADAD1	0.00259403	1	181		APC	0	1	181		ARFGAP3	0.0133929	1	181		AKT1	0.016129	1	181		AKT1	0.00653595	1	181		ARFGAP3	0	1	181		APBB1	0.00588235	1	181		ARFGAP3	0.00869565	1	181		ARFGAP3	0.0264901	1	181
	ATRX	0.176471	1	182		AIM2	0.00129702	1	182		ARFGAP3	0	1	182		ARHGEF6	0.03125	1	182		APBB1	0.0241935	1	182		APBB1	0.0130719	1	182		ARHGEF6	0.00687285	1	182		APC	0.00588235	1	182		ARHGEF6	0.0391304	1	182		ARHGEF6	0.0596026	1	182
	ATN1	0	1	183		APBB1	0.00259403	1	183		ARHGEF6	0.00510204	1	183		ARID2	0.0669643	1	183		APC	0.116935	1	183		APC	0.0424837	1	183		ARID1A	0.00687285	1	183		ARFGAP3	0	1	183		ARID1A	0.0652174	1	183		ARID2	0.119205	1	183
	TMED10	0	1	184		APC	0.00648508	1	184		ARID1A	0.00510204	1	184		ARID5B	0.0223214	1	184		ARFGAP3	0.016129	1	184		ARFGAP3	0.00653595	1	184		ARID2	0.00687285	1	184		ARHGEF6	0.0176471	1	184		ARID2	0.0652174	1	184		ARID5B	0.0463576	1	184
	PTPN11	0	1	185		ARFGAP3	0.00129702	1	185		ARID2	0.00510204	1	185		ARL15	0.00892857	1	185		ARHGEF6	0.0645161	1	185		ARHGEF6	0.00980392	1	185		ARID5B	0.00343643	1	185		ARID2	0.0176471	1	185		ARID5B	0.026087	1	185		ARL15	0.013245	1	185
	CBWD1	0	1	186		ARHGEF6	0.00518807	1	186		ARID5B	0	1	186		ATM	0.111607	1	186		ARID2	0.0564516	1	186		ARID1A	0.0424837	1	186		ARL15	0	1	186		ARID5B	0.00588235	1	186		ARL15	0.00869565	1	186		ATM	0.112583	1	186
	PTEN	0.0294118	1	187		ARID1A	0.0194553	1	187		ARL15	0	1	187		ATN1	0.0178571	1	187		ARL15	0.0241935	1	187		ARID2	0.0326797	1	187		ATM	0.0137457	1	187		ARL15	0.00588235	1	187		ATM	0.0826087	1	187		ATN1	0.0264901	1	187
	IDH2	0	1	188		ARID2	0.00648508	1	188		ATM	0	1	188		ATP6V1C2	0.00892857	1	188		ATM	0.116935	1	188		ARID5B	0.0359477	1	188		EIF1AX	0	1	188		ATM	0.00588235	1	188		EIF1AX	0.00434783	1	188		ATP6V1C2	0.0264901	1	188
	IL32	0	1	189		ARID5B	0.00389105	1	189		EIF1AX	0	1	189		ATRX	0.0223214	1	189		ATN1	0.0322581	1	189		ARL15	0	1	189		ATN1	0.0103093	1	189		ATN1	0.0176471	1	189		ATN1	0.0173913	1	189		EIF4A2	0.0198675	1	189
	INO80E	0	1	190		ARL15	0	1	190		ATN1	0	1	190		BAP1	0.00892857	1	190		ATP6V1C2	0.0483871	1	190		ATM	0.0261438	1	190		B2M	0.00343643	1	190		ATP6V1C2	0.00588235	1	190		ATRX	0.0652174	1	190		ATRX	0.0860927	1	190
	JTB	0	1	191		ATM	0.0220493	1	191		ATRX	0	1	191		BIK	0.00446429	1	191		ATRX	0.0967742	1	191		ATN1	0.0228758	1	191		BAP1	0.00687285	1	191		B2M	0	1	191		B2M	0.00434783	1	191		BAP1	0.0198675	1	191
	KDM5C	0	1	192		CBX7	0	1	192		B2M	0	1	192		BIVM	0.0267857	1	192		B2M	0.0120968	1	192		ATP6V1C2	0.00980392	1	192		BIK	0	1	192		BAP1	0	1	192		BAP1	0.0173913	1	192		BIK	0	1	192
	KDM6A	0.0588235	1	193		ATP6V1C2	0	1	193		BAP1	0	1	193		BRAF	0.0982143	1	193		BAP1	0.0403226	1	193		ATRX	0.0522876	1	193		BIVM	0.00343643	1	193		BIK	0	1	193		BIK	0	1	193		BIVM	0.0264901	1	193
	KEAP1	0.0588235	1	194		B2M	0.00389105	1	194		BIK	0	1	194		BTN2A2	0.0133929	1	194		BIK	0.00806452	1	194		BAP1	0.00980392	1	194		BRAF	0.0206186	1	194		BIVM	0.00588235	1	194		BIVM	0.00869565	1	194		BRAF	0.0331126	1	194
	KEL	0	1	195		BAP1	0.00389105	1	195		BIVM	0	1	195		BZRAP1	0.0357143	1	195		BIVM	0.016129	1	195		BIK	0.00326797	1	195		BTN2A2	0	1	195		BRAF	0.0117647	1	195		BRAF	0.0652174	1	195		BTN2A2	0.00662252	1	195
	IDH1	0	1	196		BIK	0.00129702	1	196		BRAF	0	1	196		C10orf82	0	1	196		BRAF	0.0282258	1	196		BIVM	0	1	196		BZRAP1	0.00343643	1	196		BTN2A2	0.00588235	1	196		BTN2A2	0.00869565	1	196		BZRAP1	0.0596026	1	196
	DNMT3A	0	1	197		BIVM	0.00129702	1	197		BTN2A2	0	1	197		C16orf62	0.00892857	1	197		BTN2A2	0.0201613	1	197		BRAF	0.0130719	1	197		C10orf82	0	1	197		BZRAP1	0.00588235	1	197		BZRAP1	0.0217391	1	197		C10orf82	0	1	197
	CTNNB1	0.0294118	1	198		BRAF	0.00389105	1	198		BZRAP1	0	1	198		C22orf32	0	1	198		BZRAP1	0.0443548	1	198		BTN2A2	0.00980392	1	198		C16orf62	0	1	198		C10orf82	0	1	198		C10orf82	0.00869565	1	198		C16orf62	0.0264901	1	198
	CTCF	0	1	199		BTN2A2	0.00259403	1	199		C10orf82	0	1	199		CANX	0.00892857	1	199		C10orf82	0.0120968	1	199		BZRAP1	0.00653595	1	199		C22orf32	0	1	199		C16orf62	0	1	199		C16orf62	0.0173913	1	199		C22orf32	0	1	199
	KRTAP5-5	0	1	200		BZRAP1	0.00648508	1	200		C16orf62	0	1	200		CBFB	0.00892857	1	200		C16orf62	0.0282258	1	200		C10orf82	0.00326797	1	200		CANX	0.00343643	1	200		C22orf32	0	1	200		C22orf32	0	1	200		CANX	0.00662252	1	200
	LARP4B	0	1	201		C10orf82	0	1	201		C22orf32	0	1	201		CBL	0.0133929	1	201		C22orf32	0.00403226	1	201		C16orf62	0.00980392	1	201		CASP5	0	1	201		CANX	0.00588235	1	201		CANX	0.00869565	1	201		CASP5	0.0264901	1	201
	LCE5A	0	1	202		C16orf62	0.0077821	1	202		CANX	0	1	202		CBWD1	0	1	202		CANX	0.016129	1	202		C22orf32	0	1	202		CASP8	0	1	202		CASP5	0.00588235	1	202		CASP5	0.0391304	1	202		CASP8	0.0529801	1	202
	CSNK2A1	0	1	203		C22orf32	0	1	203		CASP5	0	1	203		CBX7	0.00446429	1	203		CASP5	0.0282258	1	203		CANX	0	1	203		CBFB	0	1	203		CASP8	0	1	203		CASP8	0.0130435	1	203		CBFB	0.0198675	1	203
	CPEB1	0.0294118	1	204		CANX	0.00259403	1	204		CASP8	0	1	204		CCDC144NL	0.00892857	1	204		CASP8	0.0685484	1	204		CASP5	0.0228758	1	204		ATP6V1C2	0.00343643	1	204		CBFB	0	1	204		ATP6V1C2	0.00869565	1	204		CBL	0.0264901	1	204
	COL11A1	0.0588235	1	205		CASP5	0.00129702	1	205		ATP6V1C2	0	1	205		CCND1	0	1	205		CBFB	0.00806452	1	205		CBFB	0	1	205		EIF4A2	0	1	205		CBWD1	0.00588235	1	205		EIF4A2	0.0173913	1	205		B2M	0.013245	1	205
	KIT	0	1	206		CBL	0.00389105	1	206		MLL3	0.00510204	1	206		EPHA2	0.0223214	1	206		CBWD1	0.016129	1	206		EIF4A2	0	1	206		EIF5A2	0	1	206		EIF5A2	0	1	206		EIF5A2	0	1	206		MLL3	0.139073	1	206
	MAP2K4	0	1	207		ATRX	0.0116732	1	207		EIF4A2	0	1	207		EPS8	0.0178571	1	207		MLL3	0.104839	1	207		EIF5A2	0.00326797	1	207		ELF3	0	1	207		ELF3	0	1	207		ELF3	0.00869565	1	207		ELF3	0.0397351	1	207
	HRAS	0	1	208		EPHA2	0.00259403	1	208		ELF3	0	1	208		ERC2	0.0401786	1	208		EPHA2	0.0201613	1	208		ELF3	0.00326797	1	208		HNRNPK	0	1	208		EPHA2	0.00588235	1	208		HNRNPK	0.0130435	1	208		EPS8	0.0331126	1	208
	EGFR	0	1	209		EPS8	0.00518807	1	209		HOXA11	0	1	209		FADS2	0.0178571	1	209		ERC2	0.0483871	1	209		EPS8	0.0130719	1	209		HOXA11	0	1	209		HRAS	0	1	209		HOXA11	0.00869565	1	209		HRAS	0	1	209
	FLT3	0.0294118	1	210		ERC2	0.00259403	1	210		HOXB2	0	1	210		HTATSF1	0.00892857	1	210		HRCT1	0.00806452	1	210		HTATSF1	0.00326797	1	210		HOXB2	0	1	210		HRCT1	0	1	210		HOXB2	0.00434783	1	210		HRCT1	0.013245	1	210
	FGFR2	0	1	211		IDH1	0.00259403	1	211		HRAS	0	1	211		IDH1	0.0133929	1	211		HTATSF1	0.0403226	1	211		IDH1	0.00653595	1	211		HRAS	0	1	211		HTATSF1	0.00588235	1	211		HRAS	0.00434783	1	211		HTATSF1	0.013245	1	211
	FBXW7	0.0294118	1	212		IDH2	0	1	212		HRCT1	0	1	212		IDH2	0.03125	1	212		IDH1	0.016129	1	212		IDH2	0	1	212		HRCT1	0.00343643	1	212		IDH2	0.0352941	1	212		HRCT1	0	1	212		IDH1	0.00662252	1	212
	FUBP1	0	1	213		IL32	0	1	213		HTATSF1	0	1	213		IL32	0.0133929	1	213		IDH2	0.016129	1	213		INO80E	0	1	213		HTATSF1	0.00343643	1	213		INO80E	0	1	213		HTATSF1	0.0478261	1	213		IDH2	0.00662252	1	213
	FAT1	0.0294118	1	214		INO80E	0	1	214		IL32	0.00510204	1	214		INO80E	0.00892857	1	214		IL32	0	1	214		INTS7	0.0228758	1	214		IDH2	0	1	214		INTS7	0	1	214		IDH1	0.00869565	1	214		IL32	0	1	214
	FAM123B	0	1	215		INTS7	0.00518807	1	215		INO80E	0	1	215		INTS7	0.03125	1	215		INO80E	0.00403226	1	215		JTB	0.00326797	1	215		IL32	0.00343643	1	215		JTB	0	1	215		IDH2	0.00869565	1	215		INTS7	0.0264901	1	215
	EPS8	0	1	216		JTB	0.00259403	1	216		INTS7	0	1	216		JTB	0.00892857	1	216		INTS7	0.0322581	1	216		KDM5C	0.00980392	1	216		INO80E	0	1	216		KDM5C	0.00588235	1	216		IL32	0.00869565	1	216		JTB	0.013245	1	216
	EPHA2	0	1	217		KDM5C	0.00518807	1	217		JTB	0	1	217		KDM5C	0.0357143	1	217		JTB	0.00403226	1	217		KDM6A	0.0261438	1	217		INTS7	0	1	217		KDM6A	0.00588235	1	217		INO80E	0	1	217		KDM5C	0.0927152	1	217
	HNRNPK	0	1	218		KDM6A	0.0116732	1	218		KDM5C	0	1	218		KDM6A	0.00446429	1	218		KDM5C	0.0604839	1	218		KEAP1	0.0424837	1	218		JTB	0	1	218		KEAP1	0	1	218		INTS7	0	1	218		KDM6A	0.0331126	1	218
	GATA3	0	1	219		KEAP1	0.00259403	1	219		KDM6A	0.0153061	1	219		KEAP1	0.00892857	1	219		KDM6A	0.0443548	1	219		KEL	0.00653595	1	219		KDM5C	0.00687285	1	219		KEL	0.0235294	1	219		JTB	0.00434783	1	219		KEAP1	0.0331126	1	219
	GPS2	0	1	220		KEL	0.00129702	1	220		KEAP1	0	1	220		KEL	0.0357143	1	220		KEAP1	0.0241935	1	220		KIAA0907	0.0261438	1	220		KDM6A	0.0103093	1	220		KIAA0907	0.0176471	1	220		KDM5C	0.0521739	1	220		KEL	0.0331126	1	220
	EIF5A2	0	1	221		KIAA0907	0.00389105	1	221		KEL	0	1	221		KIAA0907	0.0133929	1	221		KEL	0.0483871	1	221		KIT	0.0130719	1	221		KEAP1	0	1	221		KIT	0.0176471	1	221		KDM6A	0.00869565	1	221		KIAA0907	0.0728477	1	221
	GZMA	0.0294118	1	222		KIT	0.00648508	1	222		KIAA0907	0	1	222		KIT	0.0267857	1	222		KIAA0907	0.0282258	1	222		KRAS	0.00326797	1	222		HMGB2	0	1	222		KRAS	0.00588235	1	222		HMGB2	0.00434783	1	222		KIT	0.0264901	1	222
	HDAC2	0	1	223		KRTAP4-1	0	1	223		KRTAP4-1	0	1	223		KRTAP4-1	0.00446429	1	223		KIT	0.0685484	1	223		KRTAP4-1	0.00980392	1	223		KIAA0907	0.0103093	1	223		KRTAP4-1	0	1	223		KEL	0.0565217	1	223		KRTAP4-1	0.013245	1	223
	EIF4A2	0	1	224		HTATSF1	0.00518807	1	224		KRTAP5-5	0	1	224		KRTAP5-5	0	1	224		KRTAP4-1	0.00806452	1	224		KRTAP5-5	0.00326797	1	224		KRAS	0.00687285	1	224		KRTAP5-5	0	1	224		KIT	0.0217391	1	224		KRTAP5-5	0.0264901	1	224
	EIF1AX	0	1	225		KRTAP5-5	0.00389105	1	225		LARP4B	0.00510204	1	225		LARP4B	0.0491071	1	225		KRTAP5-5	0.00403226	1	225		LARP4B	0.0130719	1	225		KRTAP4-1	0	1	225		LARP4B	0.0117647	1	225		KRTAP4-1	0.00434783	1	225		LARP4B	0.0397351	1	225
	HIST1H3B	0	1	226		LCE5A	0	1	226		LCE5A	0	1	226		LCE5A	0	1	226		LARP4B	0.0322581	1	226		LCE5A	0	1	226		KRTAP5-5	0	1	226		LCE5A	0.00588235	1	226		LARP4B	0.026087	1	226		LCE5A	0.0198675	1	226
	HLA-B	0	1	227		LILRB1	0.00129702	1	227		LILRB1	0	1	227		LILRB1	0.03125	1	227		LCE5A	0.00403226	1	227		LILRB1	0.0424837	1	227		LARP4B	0.00343643	1	227		LILRB1	0.0117647	1	227		LCE5A	0.0173913	1	227		LILRB1	0.0397351	1	227
	ELF3	0	1	228		LNP1	0.00129702	1	228		LNP1	0	1	228		LNP1	0.00892857	1	228		LILRB1	0.0241935	1	228		LNP1	0.00980392	1	228		LCE5A	0.00343643	1	228		LNP1	0.00588235	1	228		LILRB1	0.0434783	1	228		LNP1	0.013245	1	228
	PTMS	0	1	229		LRCH1	0.00518807	1	229		LRCH1	0	1	229		LRCH1	0.0178571	1	229		LNP1	0.0241935	1	229		LRCH1	0.00980392	1	229		LILRB1	0.0171821	1	229		LRCH1	0.00588235	1	229		LNP1	0.00434783	1	229		LRCH1	0.0529801	1	229
	MAP3K1	0	1	230		LRP10	0	1	230		LRP10	0	1	230		LRP10	0.0223214	1	230		LRCH1	0.0282258	1	230		LRP10	0.00980392	1	230		LNP1	0	1	230		LRP10	0	1	230		LRCH1	0.0217391	1	230		LRP10	0.00662252	1	230
	MLL2	0.0882353	1	231		LYPD3	0	1	231		LYPD3	0	1	231		LYPD3	0.00892857	1	231		LRP10	0.016129	1	231		LYPD3	0.00653595	1	231		LRCH1	0	1	231		LYPD3	0.00588235	1	231		LRP10	0.00869565	1	231		LYPD3	0.00662252	1	231
	NSD1	0	1	232		MAGEA10	0.00259403	1	232		MAGEA10	0	1	232		MAGEA10	0.0133929	1	232		LYPD3	0.00806452	1	232		MAGEA10	0.00326797	1	232		LRP10	0	1	232		MAGEA10	0	1	232		LYPD3	0	1	232		MAGEA10	0.0264901	1	232
	ODF1	0.0294118	1	233		MBD4	0.00259403	1	233		MAP2K4	0	1	233		MAP2K4	0.0491071	1	233		MAGEA10	0.0282258	1	233		MAP2K4	0.00326797	1	233		LYPD3	0	1	233		MAP2K4	0	1	233		MAGEA10	0.026087	1	233		MAP2K4	0.0264901	1	233
	CD5L	0	1	234		ZNF799	0.00259403	1	234		MAP3K1	0	1	234		MAP3K1	0.0223214	1	234		MAP2K4	0.0322581	1	234		MAP3K1	0.00980392	1	234		MAGEA10	0.00343643	1	234		MAP3K1	0.0117647	1	234		MAP2K4	0.0130435	1	234		MAP3K1	0.0529801	1	234
	CCND1	0	1	235		MDFI	0	1	235		MBD4	0	1	235		ZNF799	0.00892857	1	235		MAP3K1	0.0846774	1	235		MBD4	0	1	235		MAP2K4	0	1	235		MBD4	0.00588235	1	235		MAP3K1	0.0173913	1	235		MBD4	0	1	235
	PBRM1	0.0294118	1	236		MLL2	0.0168612	1	236		ZNF799	0	1	236		MDFI	0	1	236		MBD4	0.0282258	1	236		ZNF799	0.00653595	1	236		MAP3K1	0.0206186	1	236		ZNF799	0.0117647	1	236		MBD4	0.0173913	1	236		ZNF799	0.0397351	1	236
	PCDH11Y	0	1	237		MORC4	0.00389105	1	237		MDFI	0.00510204	1	237		MLL2	0.0580357	1	237		ZNF799	0.0362903	1	237		MDFI	0	1	237		MBD4	0.00343643	1	237		MDFI	0.0117647	1	237		ZNF799	0.00434783	1	237		MDFI	0.00662252	1	237
	CCDC144NL	0	1	238		MSMB	0	1	238		HNRNPK	0.0102041	1	238		MLL3	0.0535714	1	238		MDFI	0.00403226	1	238		MLL3	0.0751634	1	238		KIT	0.0103093	1	238		HOXB2	0	1	238		KIAA0907	0.0304348	1	238		HOXB2	0.013245	1	238
	PHF6	0	1	239		LARP4B	0.00648508	1	239		HMGB2	0	1	239		HRCT1	0	1	239		HRAS	0.00403226	1	239		HRCT1	0	1	239		MDFI	0	1	239		HOXA11	0	1	239		MLL2	0.0956522	1	239		HOXA11	0.013245	1	239
	NRAS	0	1	240		HRCT1	0.00129702	1	240		HLA-B	0.00510204	1	240		MSMB	0	1	240		EPS8	0.0483871	1	240		MSMB	0	1	240		HLA-B	0	1	240		HNRNPK	0	1	240		HLA-B	0.0130435	1	240		HNRNPK	0.0331126	1	240
	PIK3CA	0	1	241		HRAS	0	1	241		HIST1H3B	0	1	241		HRAS	0	1	241		HOXB2	0	1	241		HOXB2	0.00326797	1	241		HHATL	0	1	241		HMGB2	0.00588235	1	241		HHATL	0.00434783	1	241		HMGB2	0.013245	1	241
	CBX7	0	1	242		HOXB2	0.00389105	1	242		EPHA2	0.00510204	1	242		HOXA11	0.00892857	1	242		HNRNPK	0.0120968	1	242		HNRNPK	0.00653595	1	242		EPHA2	0	1	242		EPS8	0.00588235	1	242		EPHA2	0.00869565	1	242		ERC2	0.0463576	1	242
	PODXL	0.0588235	1	243		FADS2	0.00518807	1	243		EPS8	0	1	243		FAT1	0.0580357	1	243		FADS2	0.00806452	1	243		ERC2	0.0261438	1	243		EPS8	0.00343643	1	243		ERC2	0.00588235	1	243		EPS8	0.00869565	1	243		FADS2	0.0331126	1	243
	PPM1D	0	1	244		FAM123B	0.0103761	1	244		ERC2	0	1	244		FGFR2	0.0133929	1	244		FAM123B	0.0725806	1	244		FADS2	0.00653595	1	244		ERC2	0.0103093	1	244		FADS2	0.0117647	1	244		ERC2	0.0304348	1	244		FAM123B	0.0596026	1	244
	PPP2R1A	0	1	245		FAT1	0.0155642	1	245		FADS2	0	1	245		FLT3	0.0178571	1	245		FAT1	0.16129	1	245		FAM123B	0.0392157	1	245		FADS2	0	1	245		FAM123B	0.0176471	1	245		FADS2	0.00434783	1	245		FAT1	0.125828	1	245
	PPP2R4	0	1	246		FBXW7	0.0077821	1	246		FAM123B	0	1	246		FLT3LG	0.00446429	1	246		FLT3	0.0362903	1	246		FGFR2	0.00653595	1	246		FAM123B	0.00343643	1	246		FAT1	0.0176471	1	246		FAM123B	0.0695652	1	246		FBXW7	0.0728477	1	246
	PPP6C	0	1	247		FGFR2	0.00907912	1	247		FAT1	0.00510204	1	247		FOXA1	0.00446429	1	247		FLT3LG	0.00403226	1	247		FLT3	0.0130719	1	247		FAT1	0.0103093	1	247		FBXW7	0.00588235	1	247		FAT1	0.13913	1	247		FGFR2	0.0331126	1	247
	PRB2	0.117647	1	248		FLT3	0.00389105	1	248		FBXW7	0	1	248		FOXD4	0.0133929	1	248		FOXA1	0.0201613	1	248		FLT3LG	0.00326797	1	248		FBXW7	0.00343643	1	248		FGFR2	0.0117647	1	248		FBXW7	0.0173913	1	248		FLT3	0.0463576	1	248
	CBFB	0	1	249		FLT3LG	0.00259403	1	249		FGFR2	0	1	249		FOXN3	0.0133929	1	249		FOXD4	0.0282258	1	249		FOXA1	0.00653595	1	249		FGFR2	0.00343643	1	249		FLT3	0.00588235	1	249		FGFR2	0.0347826	1	249		FLT3LG	0	1	249
	PIK3R1	0	1	250		FOXD4	0	1	250		FLT3LG	0	1	250		FOXP1	0.0267857	1	250		FOXN3	0.0322581	1	250		FOXD4	0.00653595	1	250		FLT3	0.0171821	1	250		FLT3LG	0	1	250		FLT3	0.0434783	1	250		FOXA1	0.013245	1	250
	MBD4	0	1	251		FOXN3	0.00129702	1	251		FOXA1	0	1	251		FTSJ3	0.0178571	1	251		FOXP1	0.0564516	1	251		FOXN3	0.00326797	1	251		FLT3LG	0	1	251		FOXA1	0	1	251		FLT3LG	0.0130435	1	251		FOXD4	0.0264901	1	251
	NPRL2	0	1	252		FOXP1	0.00648508	1	252		FOXD4	0	1	252		FUBP1	0.00892857	1	252		FTSJ3	0.0362903	1	252		FOXP1	0.0130719	1	252		FOXA1	0.0103093	1	252		FOXD4	0.0117647	1	252		FOXA1	0.00869565	1	252		FOXN3	0.0198675	1	252
	NPM1	0	1	253		FTSJ3	0.00389105	1	253		FOXN3	0	1	253		FUZ	0	1	253		FUBP1	0.0282258	1	253		FTSJ3	0.0130719	1	253		FOXD4	0	1	253		FOXN3	0	1	253		FOXD4	0	1	253		FOXP1	0.0463576	1	253
	MLL3	0.0294118	1	254		FUBP1	0.00259403	1	254		FOXP1	0.00510204	1	254		FXR2	0.03125	1	254		FUZ	0.00806452	1	254		FUBP1	0.0163399	1	254		FOXN3	0.00343643	1	254		FOXP1	0.0117647	1	254		FOXN3	0.0130435	1	254		FTSJ3	0.0264901	1	254
	MORC4	0	1	255		FUZ	0.00129702	1	255		FTSJ3	0	1	255		GABRG1	0.0357143	1	255		FXR2	0.0241935	1	255		FUZ	0	1	255		FOXP1	0	1	255		FTSJ3	0.00588235	1	255		FOXP1	0.00869565	1	255		FUBP1	0.0397351	1	255
	MSMB	0	1	256		FXR2	0.00259403	1	256		EIF5A2	0	1	256		GAL3ST2	0.00446429	1	256		GABRG1	0.0403226	1	256		FXR2	0.00653595	1	256		HIST1H3B	0	1	256		MLL3	0.0352941	1	256		HIST1H3B	0.0130435	1	256		EPHA2	0.0397351	1	256
	MT1H	0	1	257		GABRG1	0.00259403	1	257		FUBP1	0	1	257		GATA3	0.0133929	1	257		GAL3ST2	0.00403226	1	257		GABRG1	0.0130719	1	257		FTSJ3	0	1	257		FUZ	0	1	257		FTSJ3	0.0130435	1	257		FUZ	0.00662252	1	257
	MYB	0	1	258		GAL3ST2	0.00129702	1	258		FXR2	0	1	258		GIGYF1	0.0223214	1	258		GATA3	0.0120968	1	258		GAL3ST2	0	1	258		FUZ	0	1	258		GABRG1	0.0117647	1	258		FUZ	0.00434783	1	258		GABRG1	0.00662252	1	258
	CIC	0	1	259		GIGYF1	0.00389105	1	259		GABRG1	0	1	259		GPS2	0.0178571	1	259		GIGYF1	0.0322581	1	259		GATA3	0.0196078	1	259		FXR2	0.00687285	1	259		GAL3ST2	0	1	259		FXR2	0.0130435	1	259		GAL3ST2	0.00662252	1	259
	CHD4	0.147059	1	260		GRM1	0.00518807	1	260		GAL3ST2	0	1	260		GRM1	0.0535714	1	260		GPS2	0.016129	1	260		GIGYF1	0.0130719	1	260		GABRG1	0.00687285	1	260		GATA3	0.00588235	1	260		GABRG1	0.0565217	1	260		GATA3	0.0198675	1	260
	CEBPA	0	1	261		GSX1	0.00129702	1	261		GATA3	0	1	261		GSX1	0	1	261		GRM1	0.0766129	1	261		GPS2	0.00326797	1	261		GAL3ST2	0	1	261		GIGYF1	0.0117647	1	261		GAL3ST2	0.0130435	1	261		GIGYF1	0.0662252	1	261
	NPPA	0	1	262		GZMA	0.00259403	1	262		GIGYF1	0	1	262		GZMA	0.0133929	1	262		GSX1	0.0120968	1	262		GRM1	0.0522876	1	262		GATA3	0	1	262		GPS2	0	1	262		GATA3	0.026087	1	262		GPS2	0	1	262
	NCOR1	0.0588235	1	263		HAMP	0.00129702	1	263		GPS2	0	1	263		HAMP	0.00446429	1	263		GZMA	0.0201613	1	263		GSX1	0	1	263		GIGYF1	0	1	263		GRM1	0.0176471	1	263		GIGYF1	0.00869565	1	263		GRM1	0.10596	1	263
	NF1	0	1	264		HAUS1	0.00129702	1	264		GRM1	0	1	264		HAUS1	0.00892857	1	264		HAMP	0.00403226	1	264		GZMA	0.00326797	1	264		GPS2	0	1	264		GSX1	0	1	264		GPS2	0	1	264		GSX1	0.013245	1	264
	NF2	0	1	265		HDAC2	0.00518807	1	265		GSX1	0	1	265		HDAC2	0.00892857	1	265		HAUS1	0.0282258	1	265		HAMP	0	1	265		GRM1	0.0103093	1	265		GZMA	0	1	265		GRM1	0.104348	1	265		GZMA	0.013245	1	265
	NFE2L2	0.0294118	1	266		HFE2	0.00129702	1	266		GZMA	0	1	266		HFE2	0.0133929	1	266		HDAC2	0.016129	1	266		HAUS1	0.00326797	1	266		GSX1	0.00343643	1	266		HAMP	0	1	266		GSX1	0	1	266		HAMP	0.00662252	1	266
	NHP2	0	1	267		HHATL	0	1	267		HAMP	0	1	267		HHATL	0.00892857	1	267		HFE2	0.0120968	1	267		HDAC2	0.00326797	1	267		GZMA	0	1	267		HAUS1	0.00588235	1	267		GZMA	0.0173913	1	267		HAUS1	0.013245	1	267
	CDKN1B	0	1	268		HLA-B	0	1	268		HAUS1	0	1	268		HIST1H3B	0.00446429	1	268		HHATL	0.0201613	1	268		HFE2	0	1	268		HAMP	0	1	268		HFE2	0	1	268		HAMP	0.00434783	1	268		HDAC2	0.0331126	1	268
	CDKN1A	0	1	269		HMGB2	0.00389105	1	269		HDAC2	0.00510204	1	269		HLA-B	0.00446429	1	269		HIST1H3B	0.00403226	1	269		HHATL	0.00326797	1	269		HAUS1	0	1	269		HHATL	0.00588235	1	269		HAUS1	0.00434783	1	269		HFE2	0.013245	1	269
	CDH1	0	1	270		HNRNPK	0	1	270		HFE2	0	1	270		HMGB2	0.00446429	1	270		HLA-B	0.00806452	1	270		HIST1H3B	0.00326797	1	270		HDAC2	0.0103093	1	270		HIST1H3B	0	1	270		HDAC2	0.026087	1	270		HHATL	0.0264901	1	270
	NOTCH1	0.0588235	1	271		HOXA11	0	1	271		HHATL	0	1	271		HNRNPK	0.0178571	1	271		HMGB2	0.016129	1	271		HMGB2	0.00326797	1	271		HFE2	0	1	271		HLA-B	0	1	271		HFE2	0.0173913	1	271		HIST1H3B	0.0198675	1	271
	NEFH	0.0588235	1	272		MUC7	0.00389105	1	272		FUZ	0	1	272		HOXB2	0.00446429	1	272		HOXA11	0.0201613	1	272		HOXA11	0.00653595	1	272		FUBP1	0	1	272		FXR2	0.0117647	1	272		FUBP1	0.0130435	1	272		FXR2	0.0198675	1	272
	MBD6	0.0294118	1	273		ZNF844	0.00259403	1	273		ZNF844	0	1	273		ZNF844	0	1	273		ZNF844	0.0201613	1	273		ZNF844	0.0196078	1	273		ZNF844	0.0206186	1	273		ZNF844	0.0294118	1	273		ZNF844	0.00434783	1	273		ZNF844	0	1	273

## Sheet: SMGs in TP53 wt tumors
	Colorectal Adenocarcinoma					Breast Invasive Carcinoma					Skin Cutaneous Melanoma					Uterine Corpus Endometrioid Carc.					Lung Adenocarcinoma					Lower Grade Glioma					Stomach Adenocarcinoma					Head and Neck SCC					Glioblastoma					Bladder Urothelial Carcinoma
	Gene ID	Mutation freq.	MutSigCV padj	Gene rank		Gene ID	Mutation freq.	MutSigCV padj	Gene rank		Gene ID	Mutation freq.	MutSigCV padj	Gene rank		Gene ID	Mutation freq.	MutSigCV padj	Gene rank		Gene ID	Mutation freq.	MutSigCV padj	Gene rank		Gene ID	Mutation freq.	MutSigCV padj	Gene rank		Gene ID	Mutation freq.	MutSigCV padj	Gene rank		Gene ID	Mutation freq.	MutSigCV padj	Gene rank		Gene ID	Mutation freq.	MutSigCV padj	Gene rank		Gene ID	Mutation freq.	MutSigCV padj	Gene rank
	APC	0.769231	0	1		MAP2K4	0.0629921	0	1		BRAF	0.378378	1.36117e-11	1		CTCF	0.275362	0	1		KRAS	0.345455	4.18821e-11	1		CIC	0.402439	0	1		ACVR2A	0.132353	0.00635021	1		PIK3CA	0.301075	1.70315e-07	1		PTEN	0.216867	0	1		CDKN1A	0.142857	7.09589e-06	1
	ACVR2A	0.201923	1.25646e-11	2		GATA3	0.145669	0	2		NRAS	0.405405	1.36117e-11	2		RPL22	0.173913	1.04705e-12	2		KRTAP5-5	0.1	1.61874e-09	2		IDH1	0.621951	0	2		CBWD1	0.102941	0.00635021	2		NOTCH1	0.204301	1.94632e-06	2		EGFR	0.253012	3.37182e-07	2		KDM6A	0.183673	0.00234199	2
	KRAS	0.471154	2.37332e-11	3		MAP3K1	0.122047	0	3		CDKN2A	0.162162	5.58427e-10	3		PTEN	0.84058	1.39607e-12	3		KEAP1	0.190909	2.32607e-06	3		FUBP1	0.207317	4.1882e-12	3		RNF43	0.132353	0.0160786	3		CASP8	0.11828	0.000179637	3		PIK3CA	0.144578	0.000683912	3		ARID1A	0.306122	0.0257925	3
	FBXW7	0.221154	8.09737e-09	4		PIK3CA	0.38189	7.85289e-12	4		PPP6C	0.0540541	1.71474e-05	4		ARID1A	0.449275	1.25646e-11	4		STK11	0.1	2.32607e-06	4		PIK3CA	0.158537	0.00015899	4		ARID1A	0.220588	0.0160786	4		HRAS	0.0860215	0.011249	4		PIK3R1	0.120482	0.000885091	4		ELF3	0.0816327	0.285834	4
	TGFBR2	0.173077	1.0401e-08	5		RUNX1	0.0511811	8.37641e-12	5		PTEN	0.0810811	4.50449e-05	5		PIK3R1	0.492754	1.54964e-11	5		CRIPAK	0.0727273	0.000347607	5		PIK3R1	0.097561	0.00255794	5		PIK3CA	0.235294	0.0480933	5		B2M	0.0537634	0.0250875	5		KRAS	0.0120482	1	5		PDE1A	0.0204082	1	5
	SEC63	0.134615	2.06478e-05	6		CDH1	0.102362	1.64038e-11	6		ARID2	0.162162	0.0310607	6		CTNNB1	0.347826	7.62773e-06	6		ODF1	0.0545455	0.00399612	6		PTEN	0.0853659	0.0238315	6		RPL22	0.0588235	0.0536844	6		CTCF	0.0537634	0.914451	6		KRTAP5-5	0	1	6		ODF1	0.0204082	1	6
	FAM123B	0.173077	2.06478e-05	7		PTEN	0.0393701	8.1232e-06	7		IL32	0.0540541	0.0351412	7		KRAS	0.202899	6.36678e-05	7		SPRR3	0.0363636	0.0697213	7		HDAC2	0.0487805	0.0599906	7		KRAS	0.117647	0.504274	7		RB1	0.0537634	0.970911	7		MAP2K4	0	1	7		NRAS	0.0408163	1	7
	AIM2	0.0769231	0.000303086	8		MLL3	0.0826772	0.000107304	8		B2M	0.0540541	0.0568786	8		PIK3CA	0.42029	1	8		EGFR	0.0909091	0.275211	8		IL32	0.0365854	0.33779	8		MLL2	0.176471	1	8		PDE1A	0.0107527	1	8		MAP3K1	0	1	8		NOTCH1	0.0612245	1	8
	SMAD4	0.134615	0.000766708	9		CTCF	0.0472441	0.00022042	9		PDE1A	0.189189	0.0886571	9		PDE1A	0.0434783	1	9		MUC7	0.0545455	0.889457	9		MAP3K1	0	1	9		MLL3	0.161765	1	9		ODF1	0.0107527	1	9		MLL2	0.0120482	1	9		NF1	0.0612245	1	9
	SOX9	0.0865385	0.00150307	10		TBL1XR1	0.023622	0.0110886	10		PIK3R1	0	1	10		ODF1	0.0144928	1	10		MLL2	0.0727273	1	10		MLL2	0	1	10		MUC7	0	1	10		NRAS	0	1	10		MLL3	0.0240964	1	10		MUC7	0.0204082	1	10
	NRAS	0.0865385	0.0379662	11		CDKN1B	0.015748	0.0286163	11		PIK3CA	0.027027	1	11		ACVR2A	0.0144928	1	11		MLL3	0.127273	1	11		MLL3	0.0365854	1	11		NOTCH1	0.0588235	1	11		ACVR2A	0.0107527	1	11		MUC7	0.0120482	1	11		MLL3	0.244898	1	11
	ARID1A	0.153846	0.0388888	12		FOXA1	0.0354331	0.037571	12		ODF1	0	1	12		NF1	0.0869565	1	12		MAP2K4	0	1	12		MAP2K4	0	1	12		MAP2K4	0.0441176	1	12		MUC7	0.0107527	1	12		NF1	0.120482	1	12		MLL2	0.306122	1	12
	CASP8	0.0961538	0.0922115	13		MUC7	0.00393701	1	13		ACVR2A	0	1	13		MUC7	0.0289855	1	13		NF1	0.0545455	1	13		MUC7	0.0121951	1	13		NRAS	0.0147059	1	13		MLL3	0.0430108	1	13		NOTCH1	0	1	13		MAP3K1	0.0408163	1	13
	ELF3	0.0384615	0.876314	14		NF1	0.0314961	1	14		NF1	0.162162	1	14		MLL3	0.144928	1	14		NOTCH1	0.0272727	1	14		NF1	0.0853659	1	14		KRTAP5-5	0.0147059	1	14		MLL2	0.172043	1	14		NRAS	0	1	14		MAP2K4	0	1	14
	MLL3	0.0673077	1	15		NOTCH1	0.00393701	1	15		MLL3	0.135135	1	15		MLL2	0.15942	1	15		NRAS	0.00909091	1	15		NOTCH1	0.146341	1	15		ODF1	0.0441176	1	15		MAP3K1	0.0107527	1	15		ODF1	0	1	15		KRTAP5-5	0	1	15
	MUC7	0.0192308	1	16		NRAS	0	1	16		MLL2	0.189189	1	16		MAP3K1	0.144928	1	16		PDE1A	0.0272727	1	16		NRAS	0.0121951	1	16		PDE1A	0.0147059	1	16		MAP2K4	0	1	16		PDE1A	0.0120482	1	16		PIK3CA	0.102041	1	16
	NF1	0.0576923	1	17		ODF1	0.00393701	1	17		MAP3K1	0.027027	1	17		MAP2K4	0.0144928	1	17		PIK3CA	0.0272727	1	17		ODF1	0	1	17		MAP3K1	0.0441176	1	17		PIK3R1	0.0430108	1	17		ACVR2A	0	1	17		PIK3R1	0.0204082	1	17
	NOTCH1	0	1	18		PDE1A	0	1	18		MAP2K4	0	1	18		KRTAP5-5	0	1	18		MAP3K1	0.0181818	1	18		PDE1A	0	1	18		NF1	0.0441176	1	18		NF1	0.0322581	1	18		PPP6C	0	1	18		ACVR2A	0	1	18
	ODF1	0.0288462	1	19		MLL2	0.015748	1	19		NOTCH1	0.027027	1	19		NRAS	0.0144928	1	19		ACVR2A	0	1	19		ACVR2A	0	1	19		PTEN	0.0588235	1	19		PTEN	0.0107527	1	19		RB1	0.0240964	1	19		KRAS	0	1	19
	PDE1A	0.0384615	1	20		ACVR2A	0.00787402	1	20		MUC7	0.027027	1	20		NOTCH1	0.0144928	1	20		PTEN	0.0363636	1	20		PPP6C	0	1	20		PPP6C	0	1	20		KRTAP5-5	0	1	20		RFC4	0	1	20		RB1	0.0612245	1	20
	PIK3CA	0.288462	1	21		PPP6C	0	1	21		RB1	0.027027	1	21		PPP6C	0.0144928	1	21		RB1	0.0363636	1	21		RB1	0.0365854	1	21		RB1	0.0294118	1	21		RFC4	0	1	21		RNF43	0.0120482	1	21		RFC4	0.0408163	1	21
	MAP3K1	0.0384615	1	22		KRTAP5-5	0.00787402	1	22		RFC4	0	1	22		RFC4	0	1	22		RFC4	0	1	22		RFC4	0	1	22		RFC4	0.0147059	1	22		RNF43	0.0107527	1	22		RPL22	0.0120482	1	22		RNF43	0	1	22
	MLL2	0.0865385	1	23		RB1	0.015748	1	23		RNF43	0.027027	1	23		RNF43	0.0289855	1	23		RNF43	0.0272727	1	23		RNF43	0	1	23		RUNX1	0	1	23		RPL22	0.0107527	1	23		RUNX1	0	1	23		RPL22	0	1	23
	PPP6C	0.0192308	1	24		RFC4	0.00393701	1	24		RPL22	0	1	24		RUNX1	0.0289855	1	24		RPL22	0	1	24		RPL22	0	1	24		SEC63	0.0294118	1	24		RUNX1	0.0107527	1	24		SEC63	0	1	24		RUNX1	0.0204082	1	24
	PTEN	0.0480769	1	25		RNF43	0.00393701	1	25		RUNX1	0	1	25		SEC63	0.0144928	1	25		RUNX1	0	1	25		RUNX1	0	1	25		SMAD4	0.0882353	1	25		SEC63	0.0107527	1	25		SMAD4	0.0120482	1	25		SEC63	0.0204082	1	25
	MAP2K4	0.0769231	1	26		RPL22	0	1	26		SEC63	0	1	26		SMAD4	0.0289855	1	26		SEC63	0.0181818	1	26		SEC63	0	1	26		SOX9	0.0147059	1	26		SMAD4	0.0107527	1	26		SOX9	0.0361446	1	26		SMAD4	0.0204082	1	26
	RFC4	0.00961538	1	27		SEC63	0	1	27		SMAD4	0	1	27		SOX9	0.0289855	1	27		SMAD4	0.0272727	1	27		SMAD4	0	1	27		SPRR3	0	1	27		SOX9	0	1	27		SPRR3	0	1	27		SOX9	0	1	27
	RNF43	0.0865385	1	28		SMAD4	0.00787402	1	28		SOX9	0	1	28		SPRR3	0	1	28		SOX9	0	1	28		SOX9	0	1	28		STK11	0	1	28		SPRR3	0	1	28		STK11	0	1	28		SPRR3	0	1	28
	RPL22	0.0192308	1	29		SOX9	0.00393701	1	29		SPRR3	0.0810811	1	29		STK11	0.0144928	1	29		TBL1XR1	0.00909091	1	29		SPRR3	0.0121951	1	29		TBL1XR1	0.0147059	1	29		STK11	0.0107527	1	29		TBL1XR1	0	1	29		STK11	0	1	29
	RUNX1	0.0192308	1	30		SPRR3	0	1	30		STK11	0.027027	1	30		TBL1XR1	0.0724638	1	30		TGFBR2	0	1	30		STK11	0	1	30		TGFBR2	0.0294118	1	30		TBL1XR1	0.0107527	1	30		TGFBR2	0	1	30		TBL1XR1	0	1	30
	SPRR3	0.00961538	1	31		STK11	0.00393701	1	31		TBL1XR1	0	1	31		TGFBR2	0.0289855	1	31		TMEM30B	0	1	31		TBL1XR1	0	1	31		TMEM30B	0	1	31		TGFBR2	0.0430108	1	31		TMEM30B	0	1	31		TGFBR2	0.0204082	1	31
	STK11	0	1	32		TGFBR2	0	1	32		TGFBR2	0.027027	1	32		TMEM30B	0.0144928	1	32		PPP6C	0	1	32		TGFBR2	0	1	32		PIK3R1	0.0735294	1	32		TMEM30B	0	1	32		KEAP1	0	1	32		TMEM30B	0	1	32
	TBL1XR1	0.0384615	1	33		TMEM30B	0.00393701	1	33		TMEM30B	0	1	33		RB1	0.0724638	1	33		PIK3R1	0.0181818	1	33		TMEM30B	0	1	33		KEAP1	0	1	33		PPP6C	0	1	33		KDM6A	0.0120482	1	33		PPP6C	0	1	33
	TMEM30B	0.00961538	1	34		PIK3R1	0.019685	1	34		KRTAP5-5	0	1	34		KEAP1	0.057971	1	34		JTB	0	1	34		KRTAP5-5	0	1	34		JTB	0	1	34		KRAS	0.0107527	1	34		JTB	0	1	34		PTEN	0.0204082	1	34
	PIK3R1	0.0576923	1	35		KRAS	0.00393701	1	35		KRAS	0	1	35		JTB	0	1	35		TPTE	0.0818182	1	35		KRAS	0	1	35		TPTE	0.0882353	1	35		JTB	0	1	35		IL32	0.0120482	1	35		JTB	0	1	35
	RB1	0.0288462	1	36		JTB	0.00787402	1	36		JTB	0	1	36		TPTE	0.0724638	1	36		AIM2	0.00909091	1	36		JTB	0	1	36		AIM2	0.0294118	1	36		KDM6A	0.0215054	1	36		AIM2	0	1	36		TPTE	0.0612245	1	36
	JTB	0.0192308	1	37		KDM6A	0.019685	1	37		KDM6A	0	1	37		AIM2	0.0144928	1	37		APC	0.0545455	1	37		KDM6A	0	1	37		APC	0.132353	1	37		AIM2	0	1	37		APC	0	1	37		AIM2	0	1	37
	KEAP1	0.00961538	1	38		AIM2	0	1	38		AIM2	0	1	38		APC	0.0724638	1	38		ARID1A	0.0363636	1	38		AIM2	0.0121951	1	38		ARID2	0.132353	1	38		APC	0.0107527	1	38		ARID1A	0.0120482	1	38		APC	0.0408163	1	38
	ARID2	0.0865385	1	39		APC	0.011811	1	39		APC	0.0540541	1	39		ARID2	0.0869565	1	39		ARID2	0.0818182	1	39		APC	0	1	39		ATM	0.132353	1	39		ARID1A	0.0537634	1	39		ARID2	0.0120482	1	39		ARID2	0.0612245	1	39
	ATM	0.192308	1	40		ARID1A	0.023622	1	40		ARID1A	0	1	40		ATM	0.15942	1	40		ATM	0.118182	1	40		ARID1A	0.0609756	1	40		B2M	0.0147059	1	40		ARID2	0.0537634	1	40		ATM	0.0361446	1	40		ATM	0.142857	1	40
	B2M	0.0288462	1	41		ARID2	0.00393701	1	41		ATM	0	1	41		B2M	0	1	41		B2M	0	1	41		ARID2	0	1	41		BRAF	0.0441176	1	41		ATM	0.0215054	1	41		B2M	0	1	41		B2M	0	1	41
	BRAF	0.153846	1	42		ATM	0.0314961	1	42		C12orf57	0	1	42		BRAF	0	1	42		BRAF	0.0363636	1	42		ATM	0	1	42		C12orf57	0	1	42		BRAF	0.0107527	1	42		BRAF	0.0120482	1	42		BRAF	0.0408163	1	42
	C12orf57	0	1	43		B2M	0.00787402	1	43		CASP8	0	1	43		C12orf57	0.0144928	1	43		C12orf57	0	1	43		B2M	0	1	43		CASP8	0.0294118	1	43		C12orf57	0	1	43		C12orf57	0	1	43		C12orf57	0	1	43
	CBWD1	0	1	44		BRAF	0.00393701	1	44		CBWD1	0	1	44		CASP8	0.0869565	1	44		CASP8	0.0181818	1	44		BRAF	0.0121951	1	44		CDH1	0.0147059	1	44		CBWD1	0	1	44		CASP8	0	1	44		CASP8	0.0408163	1	44
	CDH1	0.0480769	1	45		C12orf57	0.00393701	1	45		CDH1	0.027027	1	45		CBWD1	0	1	45		CBWD1	0.00909091	1	45		C12orf57	0	1	45		CDH10	0.0147059	1	45		CDH1	0	1	45		CBWD1	0	1	45		CBWD1	0	1	45
	CDH10	0.105769	1	46		CASP8	0.00787402	1	46		CDH10	0.216216	1	46		CDH1	0.0434783	1	46		CDH1	0	1	46		CASP8	0	1	46		CDKN1A	0	1	46		CDH10	0.0645161	1	46		CDH1	0	1	46		CDH1	0.0816327	1	46
	CDKN1A	0.00961538	1	47		CBWD1	0.00393701	1	47		CDKN1A	0.027027	1	47		CDH10	0.0724638	1	47		CDH10	0.136364	1	47		CBWD1	0	1	47		CDKN1B	0	1	47		CDKN1A	0	1	47		CDH10	0	1	47		CDH10	0	1	47
	CDKN1B	0.0192308	1	48		CDH10	0.00393701	1	48		CDKN1B	0	1	48		CDKN1A	0	1	48		CDKN1A	0	1	48		CDH1	0	1	48		CDKN2A	0.0147059	1	48		CDKN1B	0.0107527	1	48		CDKN1A	0	1	48		CDKN1B	0	1	48
	CDKN2A	0	1	49		CDKN1A	0	1	49		CIC	0.108108	1	49		CDKN1B	0.0289855	1	49		CDKN1B	0.00909091	1	49		CDH10	0	1	49		CIC	0.0882353	1	49		CDKN2A	0.0322581	1	49		CDKN1B	0	1	49		CDKN2A	0	1	49
	CIC	0.0384615	1	50		CDKN2A	0	1	50		CRIPAK	0	1	50		KDM6A	0.0434783	1	50		CDKN2A	0	1	50		CDKN1A	0	1	50		CRIPAK	0.0147059	1	50		KEAP1	0.0322581	1	50		CDKN2A	0.0120482	1	50		KEAP1	0	1	50
	KRTAP5-5	0	1	51		CIC	0	1	51		CTCF	0	1	51		CDKN2A	0	1	51		CIC	0.00909091	1	51		CDKN1B	0	1	51		CTCF	0.0147059	1	51		CIC	0	1	51		CIC	0	1	51		CIC	0	1	51
	CRIPAK	0	1	52		CRIPAK	0	1	52		CTNNB1	0.027027	1	52		CRIPAK	0.0289855	1	52		CTCF	0.00909091	1	52		CDKN2A	0	1	52		CTNNB1	0.0294118	1	52		CTNNB1	0.0107527	1	52		CRIPAK	0.0120482	1	52		CTCF	0	1	52
	CTNNB1	0.0673077	1	53		CTNNB1	0.00393701	1	53		EGFR	0.0810811	1	53		EGFR	0.0144928	1	53		CTNNB1	0.0545455	1	53		CRIPAK	0.0243902	1	53		EGFR	0.0147059	1	53		EGFR	0.0430108	1	53		CTCF	0	1	53		CTNNB1	0.0204082	1	53
	EGFR	0.0576923	1	54		EGFR	0	1	54		ELF3	0.027027	1	54		ELF3	0.0144928	1	54		ELF3	0.00909091	1	54		CTCF	0	1	54		ELF3	0.0294118	1	54		ELF3	0	1	54		CTNNB1	0	1	54		EGFR	0	1	54
	FOXA1	0.00961538	1	55		ELF3	0.00393701	1	55		FAM123B	0.0540541	1	55		FAM123B	0.115942	1	55		FAM123B	0.0454545	1	55		CTNNB1	0	1	55		FAM123B	0.0441176	1	55		FAM123B	0.0107527	1	55		ELF3	0	1	55		FAM123B	0.0204082	1	55
	FUBP1	0.00961538	1	56		FAM123B	0.011811	1	56		FBXW7	0.0810811	1	56		FBXW7	0.0869565	1	56		FBXW7	0.00909091	1	56		EGFR	0.0731707	1	56		FBXW7	0.0588235	1	56		FBXW7	0.0430108	1	56		FAM123B	0	1	56		FBXW7	0.102041	1	56
	GATA3	0.0192308	1	57		FBXW7	0.00787402	1	57		FOXA1	0	1	57		FOXA1	0.0144928	1	57		FOXA1	0.00909091	1	57		ELF3	0	1	57		FOXA1	0.0294118	1	57		FOXA1	0	1	57		FBXW7	0	1	57		FOXA1	0.0204082	1	57
	GPS2	0.0288462	1	58		FUBP1	0	1	58		FUBP1	0.027027	1	58		FUBP1	0.0289855	1	58		FUBP1	0.00909091	1	58		FAM123B	0	1	58		FUBP1	0.0147059	1	58		FUBP1	0.0215054	1	58		FOXA1	0.0120482	1	58		FUBP1	0	1	58
	HDAC2	0.00961538	1	59		GPS2	0.00787402	1	59		GATA3	0.0540541	1	59		GATA3	0	1	59		GATA3	0.0272727	1	59		FBXW7	0	1	59		GATA3	0.0147059	1	59		GATA3	0.0215054	1	59		FUBP1	0	1	59		GATA3	0.0204082	1	59
	HRAS	0	1	60		HDAC2	0.00393701	1	60		GPS2	0.027027	1	60		GPS2	0.0144928	1	60		GPS2	0	1	60		FOXA1	0	1	60		GPS2	0	1	60		GPS2	0.0107527	1	60		GATA3	0	1	60		GPS2	0.0408163	1	60
	IDH1	0.0192308	1	61		HRAS	0	1	61		HDAC2	0	1	61		HDAC2	0.0289855	1	61		HDAC2	0	1	61		GATA3	0	1	61		HDAC2	0.0147059	1	61		HDAC2	0	1	61		GPS2	0	1	61		HDAC2	0.0204082	1	61
	IL32	0.00961538	1	62		IDH1	0	1	62		HRAS	0.0540541	1	62		HRAS	0.0144928	1	62		HRAS	0	1	62		GPS2	0	1	62		HRAS	0	1	62		IDH1	0	1	62		HDAC2	0	1	62		HRAS	0.0408163	1	62
	TPTE	0.0576923	1	63		IL32	0	1	63		IDH1	0.0810811	1	63		IDH1	0.0144928	1	63		IDH1	0.0181818	1	63		HRAS	0	1	63		IDH1	0	1	63		IL32	0	1	63		HRAS	0	1	63		IDH1	0.0204082	1	63
	KDM6A	0	1	64		TPTE	0.00393701	1	64		TPTE	0.27027	1	64		IL32	0	1	64		IL32	0	1	64		TPTE	0.0365854	1	64		IL32	0	1	64		TPTE	0.0860215	1	64		IDH1	0	1	64		IL32	0.0204082	1	64
	CTCF	0.0384615	1	65		KEAP1	0.00787402	1	65		KEAP1	0	1	65		CIC	0.0434783	1	65		KDM6A	0.00909091	1	65		KEAP1	0	1	65		KDM6A	0.0294118	1	65		CRIPAK	0	1	65		TPTE	0.0361446	1	65		CRIPAK	0.0204082	1	65
	ZNF799	0.00961538	1	66		ZNF799	0.00393701	1	66		ZNF799	0.0540541	1	66		ZNF799	0.0434783	1	66		ZNF799	0	1	66		ZNF799	0	1	66		ZNF799	0.0294118	1	66		ZNF799	0.0107527	1	66		ZNF799	0.0120482	1	66		ZNF799	0.0204082	1	66

## Sheet: SMGs in TP53 mutant tumors
	Colorectal Adenocarcinoma					Breast Invasive Carcinoma					Skin Cutaneous Melanoma					Uterine Corpus Endometrioid Carc.					Lung Adenocarcinoma					Lower Grade Glioma					Stomach Adenocarcinoma					Head and Neck SCC					Glioblastoma					Bladder Urothelial Carcinoma
	Gene ID	Mutation freq.	MutSigCV padj	Gene rank		Gene ID	Mutation freq.	MutSigCV padj	Gene rank		Gene ID	Mutation freq.	MutSigCV padj	Gene rank		Gene ID	Mutation freq.	MutSigCV padj	Gene rank		Gene ID	Mutation freq.	MutSigCV padj	Gene rank		Gene ID	Mutation freq.	MutSigCV padj	Gene rank		Gene ID	Mutation freq.	MutSigCV padj	Gene rank		Gene ID	Mutation freq.	MutSigCV padj	Gene rank		Gene ID	Mutation freq.	MutSigCV padj	Gene rank		Gene ID	Mutation freq.	MutSigCV padj	Gene rank
	TP53	1	1.67528e-11	1		TP53	1	0	1		TP53	1	1.88469e-11	1		TP53	1	0	1		TP53	1	0	1		IDH1	0.902439	6.28231e-12	1		TP53	1	2.0941e-12	1		CDKN2A	0.225806	0	1		RB1	0.204819	4.1882e-12	1		TP53	1	0	1
	KRAS	0.413462	1.67528e-11	2		PIK3CA	0.23622	7.32936e-12	2		NRAS	0.378378	0.00028523	2		PIK3CA	0.463768	0	2		KRAS	0.190909	6.90935e-07	2		TP53	1	6.28231e-12	2		CBWD1	0.117647	0.00457086	2		TP53	1	1.04705e-12	2		PTEN	0.349398	8.37641e-12	2		KDM6A	0.367347	2.0941e-12	2
	APC	0.769231	1.81489e-11	3		PTEN	0.0393701	1.99983e-05	3		CDKN2A	0.297297	0.00293206	3		PPP2R1A	0.202899	0.00215469	3		CDKN2A	0.127273	0.000816435	3		ATRX	0.804878	9.07444e-12	3		RPL22	0.0735294	0.00457086	3		FAT1	0.258065	0.00017358	3		TP53	1	1.04705e-11	3		RB1	0.204082	2.23882e-05	3
	NRAS	0.0961538	0.00136717	4		RB1	0.0275591	0.00530733	4		ACVR2A	0.027027	1	4		PTEN	0.26087	0.0804955	4		KEAP1	0.145455	0.00985411	4		KRAS	0	1	4		ACVR2A	0.102941	0.0954211	4		NOTCH1	0.236559	0.0358942	4		PIK3R1	0.13253	1.67214e-08	4		ZNF513	0	0.0297163	4
	TCF7L2	0.115385	0.00236608	5		GATA3	0.0275591	0.0110482	5		KRAS	0	1	5		PIK3R1	0.217391	0.208461	5		STK11	0.0727273	0.0172657	5		MUC7	0.0487805	1	5		STK11	0	1	5		PIK3CA	0.172043	0.0358942	5		IDH1	0.180723	7.40342e-07	5		CDKN1A	0.102041	0.0297163	5
	FBXW7	0.115385	0.0155206	6		PIK3R1	0.0314961	0.0892799	6		MUC7	0.243243	1	6		KRAS	0.101449	1	6		CSMD3	0.6	0.0173938	6		NF1	0.0487805	1	6		TMED10	0.0147059	1	6		CASP8	0.0645161	0.807054	6		NF1	0.120482	0.00910839	6		ARID1A	0.22449	0.0297163	6
	ACVR2A	0.0384615	1	7		KEAP1	0	1	7		NF1	0.297297	1	7		MUC7	0.0289855	1	7		FAM5C	0.218182	0.053816	7		NOTCH1	0.0487805	1	7		RB1	0.0735294	1	7		ACVR2A	0.0107527	1	7		EGFR	0.180723	0.0118908	7		CDKN1B	0.0612245	0.43796	7
	MUC7	0.0192308	1	8		KRAS	0.00787402	1	8		NOTCH1	0.0540541	1	8		NF1	0.057971	1	8		MUC7	0.0909091	0.605696	8		NRAS	0	1	8		PTEN	0	1	8		MUC7	0.0107527	1	8		PIK3CA	0.13253	0.0577572	8		CDKN2A	0.0816327	0.43796	8
	NF1	0.0192308	1	9		MUC7	0.00787402	1	9		PADI2	0.0540541	1	9		NOTCH1	0.0144928	1	9		RB1	0.0727273	0.605696	9		PADI2	0.0243902	1	9		PPP2R1A	0.0441176	1	9		NF1	0.0107527	1	9		TPTE2	0.0722892	0.0744599	9		STK11	0	1	9
	NOTCH1	0	1	10		NF1	0.015748	1	10		PIK3CA	0.108108	1	10		NRAS	0.0289855	1	10		BCLAF1	0.136364	0.61157	10		PIK3CA	0.0243902	1	10		KEAP1	0.0441176	1	10		NRAS	0	1	10		RPL22	0	1	10		MUC7	0.0816327	1	10
	PADI2	0	1	11		NOTCH1	0.011811	1	11		PIK3R1	0	1	11		PADI2	0.0289855	1	11		NF1	0.190909	1	11		PPP2R1A	0	1	11		PIK3R1	0.0441176	1	11		PADI2	0.0107527	1	11		TCF7L2	0	1	11		NF1	0.0816327	1	11
	PPP2R1A	0.00961538	1	12		NRAS	0.00393701	1	12		PPP2R1A	0	1	12		ACVR2A	0.0289855	1	12		NOTCH1	0.0454545	1	12		KEAP1	0	1	12		PIK3CA	0.0882353	1	12		PIK3R1	0.0107527	1	12		TMED10	0	1	12		NOTCH1	0.0408163	1	12
	PIK3R1	0.0288462	1	13		ACVR2A	0.00393701	1	13		PTEN	0.0540541	1	13		RB1	0.101449	1	13		NRAS	0.0272727	1	13		PTEN	0.0121951	1	13		PADI2	0.0441176	1	13		PPP2R1A	0.0215054	1	13		PPP2R1A	0	1	13		NRAS	0	1	13
	PTEN	0.0288462	1	14		PPP2R1A	0	1	14		RB1	0.027027	1	14		RPL22	0.0434783	1	14		PADI2	0.0272727	1	14		RB1	0.0121951	1	14		NRAS	0	1	14		PTEN	0.0215054	1	14		KEAP1	0	1	14		PADI2	0.0816327	1	14
	RB1	0.0192308	1	15		RPL22	0	1	15		RPL22	0	1	15		STK11	0.0144928	1	15		ACVR2A	0.0272727	1	15		RPL22	0	1	15		NOTCH1	0.102941	1	15		RB1	0.0215054	1	15		PADI2	0	1	15		PIK3R1	0.0204082	1	15
	RPL22	0	1	16		STK11	0	1	16		STK11	0.027027	1	16		TCF7L2	0.0144928	1	16		PPP2R1A	0.0181818	1	16		STK11	0	1	16		NF1	0.102941	1	16		RPL22	0	1	16		NRAS	0	1	16		TCF7L2	0	1	16
	STK11	0	1	17		TCF7L2	0.00393701	1	17		TCF7L2	0.027027	1	17		TMED10	0.0144928	1	17		PTEN	0.0272727	1	17		TCF7L2	0.0243902	1	17		MUC7	0.0441176	1	17		STK11	0	1	17		NOTCH1	0	1	17		PPP2R1A	0.0204082	1	17
	TMED10	0.00961538	1	18		TMED10	0	1	18		TMED10	0	1	18		KEAP1	0	1	18		RPL22	0.00909091	1	18		TMED10	0.0121951	1	18		KRAS	0.0882353	1	18		TCF7L2	0	1	18		MUC7	0	1	18		PTEN	0.0204082	1	18
	PIK3CA	0.125	1	19		PADI2	0.00393701	1	19		KEAP1	0	1	19		KDM6A	0.057971	1	19		TCF7L2	0.0272727	1	19		PIK3R1	0.0487805	1	19		TCF7L2	0.0294118	1	19		TMED10	0	1	19		KRAS	0	1	19		TMED10	0	1	19
	KEAP1	0	1	20		KDM6A	0.011811	1	20		KDM6A	0.0540541	1	20		IDH1	0.0434783	1	20		TMED10	0	1	20		KDM6A	0.0121951	1	20		KDM6A	0.0441176	1	20		KRAS	0	1	20		STK11	0	1	20		RPL22	0	1	20
	IDH1	0.00961538	1	21		IDH1	0	1	21		IDH1	0.0810811	1	21		GATA3	0.0144928	1	21		PIK3CA	0.0727273	1	21		ACVR2A	0.0121951	1	21		IDH1	0	1	21		KEAP1	0.0645161	1	21		ACVR2A	0	1	21		PIK3CA	0.265306	1	21
	TPTE2	0.0288462	1	22		FBXW7	0.011811	1	22		GATA3	0.027027	1	22		APC	0.115942	1	22		PIK3R1	0.00909091	1	22		GATA3	0.0121951	1	22		GATA3	0.0147059	1	22		IDH1	0	1	22		GATA3	0	1	22		KRAS	0	1	22
	ARID1A	0.0384615	1	23		APC	0.00787402	1	23		APC	0.189189	1	23		ARID1A	0.101449	1	23		IDH1	0	1	23		APC	0.0121951	1	23		APC	0.132353	1	23		TPTE2	0	1	23		APC	0.0120482	1	23		ACVR2A	0.0204082	1	23
	ARID2	0.0480769	1	24		ARID1A	0.00787402	1	24		ARID1A	0.0810811	1	24		ARID2	0.057971	1	24		TPTE2	0.0454545	1	24		ARID1A	0.0609756	1	24		ARID1A	0.132353	1	24		APC	0.0430108	1	24		ARID1A	0	1	24		TPTE2	0	1	24
	ATRX	0.00961538	1	25		ARID2	0.00787402	1	25		ARID2	0.162162	1	25		ATRX	0.0869565	1	25		APC	0.118182	1	25		ARID2	0.0365854	1	25		ARID2	0.102941	1	25		ARID1A	0.0322581	1	25		ARID2	0.0120482	1	25		APC	0.0612245	1	25
	B2M	0.0192308	1	26		ATRX	0.015748	1	26		ATRX	0.135135	1	26		B2M	0	1	26		ARID1A	0.1	1	26		B2M	0	1	26		ATRX	0.117647	1	26		ARID2	0.0322581	1	26		ATRX	0.156627	1	26		ARID2	0.0612245	1	26
	BCLAF1	0.0384615	1	27		B2M	0.00393701	1	27		B2M	0	1	27		BCLAF1	0.0434783	1	27		ARID2	0.0454545	1	27		BCLAF1	0.0243902	1	27		B2M	0.0147059	1	27		ATRX	0.0215054	1	27		B2M	0.0120482	1	27		ATRX	0.0816327	1	27
	CAMKV	0.00961538	1	28		BCLAF1	0.00787402	1	28		BCLAF1	0.351351	1	28		CAMKV	0.0144928	1	28		ATRX	0.1	1	28		CAMKV	0.0121951	1	28		BCLAF1	0.102941	1	28		B2M	0.0107527	1	28		BCLAF1	0.0240964	1	28		B2M	0.0204082	1	28
	CASP8	0	1	29		CAMKV	0.00787402	1	29		CAMKV	0.108108	1	29		CASP8	0.0869565	1	29		B2M	0.00909091	1	29		CASP8	0	1	29		CAMKV	0.0441176	1	29		BCLAF1	0.0322581	1	29		CAMKV	0	1	29		BCLAF1	0.0612245	1	29
	KDM6A	0.00961538	1	30		TPTE2	0.011811	1	30		TPTE2	0.189189	1	30		CBWD1	0.0289855	1	30		CAMKV	0.0181818	1	30		TPTE2	0.0243902	1	30		TPTE2	0.0588235	1	30		CAMKV	0	1	30		KDM6A	0.0120482	1	30		CAMKV	0	1	30
	CBWD1	0	1	31		CASP8	0.015748	1	31		CASP8	0.0810811	1	31		CDKN1A	0	1	31		KDM6A	0.00909091	1	31		CBWD1	0.0121951	1	31		CASP8	0.0588235	1	31		CBWD1	0	1	31		CASP8	0	1	31		KEAP1	0.0612245	1	31
	CDKN1B	0.00961538	1	32		CDKN1A	0	1	32		CDKN1A	0.027027	1	32		CDKN1B	0.0289855	1	32		CASP8	0.00909091	1	32		CDKN1B	0.0121951	1	32		CDKN1B	0	1	32		CDKN1A	0	1	32		CDKN1A	0.0120482	1	32		CASP8	0.0204082	1	32
	CDKN2A	0.0192308	1	33		CDKN1B	0.00393701	1	33		CDKN1B	0	1	33		CDKN2A	0	1	33		CDKN1A	0.00909091	1	33		CDKN2A	0.0243902	1	33		CDKN2A	0.0441176	1	33		CDKN1B	0	1	33		CDKN1B	0.0120482	1	33		CSMD3	0.122449	1	33
	CSMD3	0.105769	1	34		CDKN2A	0	1	34		CSMD3	0.621622	1	34		CSMD3	0.202899	1	34		CDKN1B	0.0272727	1	34		CSMD3	0.0365854	1	34		CSMD3	0.294118	1	34		CSMD3	0.236559	1	34		CDKN2A	0	1	34		EGFR	0.0204082	1	34
	EGFR	0.0192308	1	35		CSMD3	0.0275591	1	35		EGFR	0.0540541	1	35		EGFR	0.0289855	1	35		EGFR	0.136364	1	35		EGFR	0.0243902	1	35		EGFR	0.0882353	1	35		EGFR	0.0752688	1	35		CSMD3	0.0240964	1	35		FAM5C	0.0204082	1	35
	FAM5C	0.0288462	1	36		EGFR	0.015748	1	36		FAM5C	0.297297	1	36		FAM5C	0.0144928	1	36		FAT1	0.181818	1	36		FAM5C	0.0121951	1	36		FAM5C	0.0882353	1	36		FAM5C	0.0215054	1	36		FAM5C	0	1	36		FAT1	0.102041	1	36
	FAT1	0.0480769	1	37		FAM5C	0.023622	1	37		FAT1	0.189189	1	37		FAT1	0.144928	1	37		FBXW7	0.0181818	1	37		FAT1	0.0121951	1	37		FAT1	0.147059	1	37		FBXW7	0.0645161	1	37		FAT1	0.0120482	1	37		FBXW7	0.0816327	1	37
	GATA3	0.00961538	1	38		FAT1	0.00787402	1	38		FBXW7	0.108108	1	38		FBXW7	0.202899	1	38		GATA3	0.0181818	1	38		FBXW7	0.0121951	1	38		FBXW7	0.102941	1	38		GATA3	0.0107527	1	38		FBXW7	0.0120482	1	38		GATA3	0	1	38
	CDKN1A	0	1	39		CBWD1	0.00393701	1	39		CBWD1	0	1	39		TPTE2	0.057971	1	39		CBWD1	0.00909091	1	39		CDKN1A	0	1	39		CDKN1A	0.0147059	1	39		KDM6A	0.0322581	1	39		CBWD1	0	1	39		CBWD1	0	1	39
	ZNF513	0	1	40		ZNF513	0	1	40		ZNF513	0	1	40		ZNF513	0	1	40		ZNF513	0	1	40		ZNF513	0	1	40		ZNF513	0	1	40		ZNF513	0	1	40		ZNF513	0	1	40		IDH1	0.0408163	1	40
