# Supplementary material for: Identification of a core TP53 transcriptional program with highly distributed tumor suppressive activity
Source: HighWire-hosted journal article supplement (doi:10.1101/gr.220533.117), 2017-09-13
Supplement: Supplemental_File_S10_TCGA_copy_number_data.xlsx [file Supplemental_File_S10_TCGA_copy_number_data.xlsx]

## Sheet: Pan-can
	CN gain										CN loss
	cytoband	q value	residual q value	wide peak boundaries	# of genes in the region	# of TP53 core genes in the region	TP53 core genes in the region				cytoband	q value	residual q value	wide peak boundaries	# of genes in the region	# of TP53 core genes in the region	TP53 core genes in the region
	1q21.3	4.8612e-61	1.0096e-47	chr1:150516762-150652177	9	0					1p13.2	2.4433e-14	3.9031e-07	chr1:103566575-118152240	147	1	FAM212B
	1q32.1	7.6547e-23	1.8178e-12	chr1:204406035-204529807	2	0					1p36.11	1.1178e-89	4.8156e-34	chr1:26963410-27127934	4	0
	1q44	2.7581e-19	1.1284e-07	chr1:242974745-247178511	24	0					1p36.31	1.2991e-106	1.8682e-46	chr1:6011130-6475685	9	0
	1p34.2	8.9974e-14	8.9974e-14	chr1:39959702-40423030	12	0					2q22.1	5.5585e-63	6.0764e-49	chr2:140708948-143637838	2	0
	2q31.2	0.00010852	0.00010852	chr2:178083264-178154838	3	0					2q37.3	3.0619e-78	1.2785e-61	chr2:242119420-243199373	16	0
	3q26.32	6.4111e-101	6.4111e-101	chr3:178952221-178968659	2	0					3q13.31	3.1323e-13	3.4243e-13	chr3:115556210-118620828	6	0
	4p16.3	0.00035213	0.00035213	chr4:1778797-1816689	2	0					3p26.2	0.00017365	0.055135	chr3:3220635-4535479	3	0
	4q12	4.6942e-24	3.5494e-19	chr4:55004387-55102558	2	0					3p14.2	1.1379e-38	4.5951e-24	chr3:59701447-61547330	3	0
	4q13.3	2.7395e-07	0.0011665	chr4:73900684-74269687	4	0					3p12.2	5.5782e-16	0.0001848	chr3:79814918-84688247	1	0
	5p15.33	2.3156e-21	2.3156e-21	chr5:1287704-1300024	1	0					4p16.3	0.015536	0.015536	chr4:1-1215099	26	0
	5q35.3	0.00037368	0.00037368	chr5:176359336-176749159	7	0					4q34.3	9.9109e-93	1.5337e-29	chr4:179280062-182757119	4	0
	6q21	4.4131e-07	1.6922e-06	chr6:107198224-107339613	1	0					4q35.2	6.1828e-78	1.0279e-17	chr4:187475875-191154276	16	0
	6p22.3	1.0181e-10	3.2395e-08	chr6:19774295-20322277	2	0					4q22.1	2.7069e-47	1.5449e-36	chr4:91271445-93240505	1	0
	6p21.1	2.9912e-06	0.0011477	chr6:43605120-43648987	3	0					5q35.2	0.0002224	0.29315	chr5:175053854-175224904	2	0
	6q12	0.00014223	0.0043622	chr6:64257063-64344859	1	1	PTP4A1				5q12.1	6.1198e-106	2.2461e-90	chr5:58998410-59780946	2	0
	7q34	0.00025658	0.0052122	chr7:139640568-140753365	16	0					5q15	7.1025e-22	0.087387	chr5:93446611-93956985	1	0
	7p11.2	1.6151e-196	3.3511e-196	chr7:55076540-55107468	1	0					6p25.3	1.2438e-13	1.2629e-13	chr6:1608837-2624052	2	0
	7q21.2	5.4297e-07	4.4466e-05	chr7:92196092-92547963	2	0					6q26	4.3483e-75	2.9369e-68	chr6:161693099-163153207	1	0
	8q24.21	3.9858e-165	3.9858e-165	chr8:128738060-128770551	1	0					6q21	6.0197e-11	0.00082757	chr6:86294747-116252550	148	3	SESN1, PRDM1, ASCC3
	8p11.23	5.5637e-95	4.2701e-70	chr8:38191804-38204651	1	0					7p22.3	2.063e-12	2.0378e-12	chr7:1-1246904	14	0
	8p11.21	8.5132e-46	2.5086e-12	chr8:41870251-41896337	1	0					7q31.1	5.9602e-07	0.00026619	chr7:108535383-111366370	4	0
	9p13.3	2.5452e-06	1.9316e-05	chr9:35652385-35739486	9	0					7q36.1	1.4418e-12	1.9957e-09	chr7:151817415-152136074	1	0
	9p24.1	0.013639	0.11357	chr9:5420527-5565600	3	0					8p23.2	4.7575e-94	8.3078e-93	chr8:2112968-4251283	2	0
	10p15.1	0.02179	0.02179	chr10:5027949-5040636	1	0					8p11.21	0.0024307	0.045554	chr8:42883855-47750537	6	0
	10q22.2	4.5082e-06	4.5082e-06	chr10:76438236-77088808	7	0					9q34.3	0.00046649	0.0014757	chr9:139376600-139456211	4	0
	11p13	0.00081815	0.00086666	chr11:34811262-34828771	1	0					9p21.3	0	0	chr9:21626574-22448737	5	0
	11q13.3	2.1176e-310	8.3328e-275	chr11:69475863-69487994	1	0					9q21.11	6.8395e-19	1.0341e-06	chr9:38619152-71152237	57	0
	11q14.1	1.3802e-79	2.8222e-12	chr11:77602545-77928109	9	0					9p23	1.1681e-69	5.9645e-24	chr9:8885227-12687261	2	0
	12p13.33	2.0972e-14	2.3608e-10	chr12:1-1071814	11	0					10p15.3	6.7361e-07	6.8589e-07	chr10:1-857150	8	0
	12p12.1	1.5074e-17	2.4211e-12	chr12:25348817-25370699	2	0					10q26.3	8.9604e-26	1.7357e-16	chr10:135190263-135214343	1	0
	12q14.1	1.6164e-39	1.8817e-13	chr12:58135797-58156509	5	0					10q23.31	1.8965e-144	4.6619e-136	chr10:89615138-89755074	3	0
	12q15	1.4661e-66	4.1659e-48	chr12:69215691-69265277	2	1	MDM2				11p15.5	8.5237e-38	8.4418e-38	chr11:1-709860	32	0
	13q34	8.4038e-05	8.4038e-05	chr13:113737078-114207877	11	0					11q23.1	4.8984e-31	1.3026e-11	chr11:106886059-117024891	88	0
	14q13.2	8.2677e-08	8.2677e-08	chr14:35870697-36025436	3	0					11q25	8.3761e-31	8.1246e-10	chr11:133400280-135006516	11	0
	15q26.3	1.3057e-21	1.3057e-21	chr15:99254995-99660663	4	0					12p13.1	0.0032358	0.0032132	chr12:12710990-12966966	5	0
	17q12	5.2547e-139	3.9079e-105	chr17:37863586-37869191	1	0					12q24.33	5.6579e-10	4.2557e-05	chr12:132552184-133851895	24	0
	17q23.1	1.427e-35	1.656e-07	chr17:57921224-57946458	1	0					12q23.1	9.5885e-06	0.012368	chr12:99119269-100424312	3	0
	17q25.3	8.3143e-19	0.00018269	chr17:77708265-77822862	4	0					13q12.11	4.2095e-29	5.0693e-10	chr13:1-20535070	15	0
	18q11.2	6.0923e-06	6.0923e-06	chr18:23857484-24232596	3	0					13q14.2	3.0354e-77	6.8553e-62	chr13:48875329-49064807	2	0
	19p13.12	4.1485e-09	4.1485e-09	chr19:15339105-15357756	2	0					14q11.2	0.01157	0.09161	chr14:1-20917441	35	0
	19q12	6.5067e-70	3.0135e-50	chr19:30258695-30321189	1	0					14q23.3	1.6347e-05	0.014396	chr14:66963153-67658112	1	0
	19q13.2	1.1953e-16	0.04969	chr19:38564392-38891508	13	0					14q32.32	8.5251e-06	0.0066074	chr14:97406190-105136992	140	0
	19q13.43	0.0024164	0.29346	chr19:58688431-58726568	1	0					15q13.1	2.0699e-39	1.046e-14	chr15:28096454-31198928	34	0
	20q11.21	4.764e-11	1.0645e-07	chr20:30228473-30277986	2	0					15q15.1	6.4486e-36	2.5041e-09	chr15:41790988-42121792	6	0
	20q13.2	9.2795e-28	4.754e-10	chr20:52148496-52359576	1	0					16p13.3	3.4894e-07	0.12892	chr16:3764793-4004422	1	0
	20q13.33	1.9758e-19	3.5316e-05	chr20:62187235-63025520	30	0					16q12.1	0.01944	0.45318	chr16:49885509-52041007	17	0
	21q21.1	0.076734	0.076734	chr21:16630118-16830423	1	0					16p13.3	3.1584e-16	2.728e-11	chr16:5144019-7780235	2	0
	22q11.21	0.035128	0.035128	chr22:18613558-22100717	82	0					16q23.1	7.7007e-56	9.1853e-44	chr16:78098006-79031486	1	0
											16q24.3	7.3987e-22	0.033473	chr16:88525832-90354753	48	0
											17p13.3	0.0077147	0.14062	chr17:1-1180022	15	0
											17p12	2.3952e-07	1.6567e-05	chr17:11919496-12456081	2	0
											17q11.2	3.3502e-30	4.161e-27	chr17:29326736-29722618	5	0
											17q25.3	0.0011035	0.021572	chr17:80698053-80902740	2	0
											18q23	4.4177e-29	4.6011e-29	chr18:75573485-78077248	13	1	PARD6G
											19p13.3	3.6692e-139	3.6692e-139	chr19:1171151-1272039	4	0
											19q13.32	7.7424e-14	3.0395e-05	chr19:47351962-47527908	2	0
											19q13.43	2.7952e-17	2.3181e-06	chr19:58457932-59128983	31	0
											20p12.1	4.819e-08	4.819e-08	chr20:14301156-16252980	2	0
											21q11.2	1.1371e-12	1.1091e-12	chr21:1-15594370	13	0
											22q11.1	0.0011717	0.070325	chr22:1-17738307	13	0
											22q13.31	8.3318e-34	0.045955	chr22:46444453-46525793	6	0
											22q13.32	3.0311e-41	4.6859e-16	chr22:48668582-51304566	42	0

## Sheet: BLCA
	CN gain										CN loss
	cytoband	q value	residual q value	wide peak boundaries	# of genes in the region	# of TP53 core genes in the region	TP53 core genes in the region				cytoband	q value	residual q value	wide peak boundaries	# of genes in the region	# of TP53 core genes in the region	TP53 core genes in the region
	1q21.3	6.4747e-05	0.082001	chr1:152515923-152615485	5	0					1p36.11	0.030887	0.030887	chr1:26598696-26984228	13	0
	1q23.3	1.0193e-14	1.4298e-13	chr1:161032152-161074600	4	0					2q22.1	7.1018e-10	7.1775e-09	chr2:140708948-143637838	2	0
	1p34.2	0.0016709	0.0016709	chr1:40194853-40534841	7	0					2q34	4.9029e-06	0.0039157	chr2:213401694-214176087	1	0
	3p25.2	1.7851e-12	1.7851e-12	chr3:12481505-12491536	1	0					2q37.1	0.00015103	0.013441	chr2:219461351-243199373	105	1	KLHL30
	4p16.3	0.0040322	0.0040322	chr4:1752421-1817427	2	0					3p21.31	0.030043	0.19934	chr3:25703641-78166985	106	0
	6p22.3	1.1451e-25	1.1451e-25	chr6:20562132-21184251	1	0					3p14.2	0.0044226	0.11938	chr3:59034763-61547330	3	0
	7p11.2	2.6734e-08	2.6734e-08	chr7:54993065-55397917	1	0					3p12.3	0.020194	0.047062	chr3:64670406-84688247	51	0
	8q22.2	1.1549e-10	1.6239e-09	chr8:101340193-102194219	10	0					4q34.2	0.0093886	0.033681	chr4:175897496-177608637	6	0
	8q24.21	1.5986e-05	0.15705	chr8:127580961-129789133	12	0					4q22.1	5.683e-08	2.7347e-07	chr4:91271445-93240505	1	0
	8p11.21	0.012809	0.027365	chr8:41631592-42103038	7	0					5q12.1	1.0168e-08	1.0168e-08	chr5:58998410-59780946	2	0
	10p15.1	0.0051238	0.0051238	chr10:5610225-5628861	1	0					6p25.3	0.0062952	0.0061985	chr6:1-2624052	10	0
	11q13.3	3.7092e-13	3.7092e-13	chr11:69464719-69503929	2	0					6q22.31	0.0013837	0.0013837	chr6:119470184-120336679	2	0
	12q15	5.3117e-05	5.3117e-05	chr12:69178021-70175610	12	1	MDM2				8p23.3	0.043908	0.079876	chr8:1-4251018	14	0
	16p11.2	0.09947	0.09947	chr16:29260552-29426411	2	0					9p21.3	8.6373e-55	2.8658e-53	chr9:21931610-22448737	3	0
	17q11.2	0.00088866	0.0053803	chr17:27684909-27697547	1	0					9p23	0.0014867	0.15941	chr9:7887952-12687261	3	0
	17q12	3.097e-06	4.9283e-06	chr17:37882956-37905815	3	0					10q23.31	0.0092222	0.0090852	chr10:89617158-89755074	3	0
	19q12	1.7712e-08	4.6275e-08	chr19:30477376-30528102	1	0					13q14.2	2.7347e-07	2.7347e-07	chr13:48875329-49152025	3	0
	19q13.43	0.070412	0.12025	chr19:58288170-58353156	3	0					15q13.1	0.01883	0.01832	chr15:25681113-31198928	44	0
	20q11.21	0.017919	0.017919	chr20:30109883-30332464	6	0					16p13.3	2.087e-05	2.087e-05	chr16:3764793-4004422	1	0
	22q11.23	0.031001	0.031001	chr22:25345698-26297193	8	0					16q23.1	0.010524	0.010524	chr16:78098006-79031486	1	0
											17p12	0.0014737	0.0013837	chr17:14131834-16096253	23	0
											19p13.3	0.0026567	0.0026567	chr19:1033227-1272039	9	0

## Sheet: BRCA
	CN gain										CN loss
	cytoband	q value	residual q value	wide peak boundaries	# of genes in the region	# of TP53 core genes in the region	TP53 core genes in the region				cytoband	q value	residual q value	wide peak boundaries	# of genes in the region	# of TP53 core genes in the region	TP53 core genes in the region
	1q21.3	3.9867e-22	1.2235e-16	chr1:150496857-150678056	10	0					1p36.13	6.4582e-30	1.4987e-28	chr1:15439256-18438929	56	0
	1q44	8.3761e-06	0.012179	chr1:233232859-249250621	139	0					1p21.2	2.4174e-08	8.0014e-05	chr1:86622286-114935947	218	1	FAM212B
	3q26.32	4.9407e-08	4.9407e-08	chr3:178615214-179125604	7	1	ZMAT3				2p25.1	0.073063	0.07342	chr2:1-23610837	118	0
	3p26.1	0.0010563	0.0010563	chr3:4575473-5163416	4	0					2q22.3	0.022595	0.064087	chr2:135657706-154305109	53	0
	4q13.3	0.00025082	0.00025082	chr4:73927475-74269687	4	0					2q37.3	1.8004e-11	8.8832e-11	chr2:241834876-243199373	20	0
	6q21	4.7528e-16	1.35e-13	chr6:107206856-107290700	1	0					3p14.3	1.204e-13	1.204e-13	chr3:55108056-62385826	38	0
	6p23	0.0073772	0.02228	chr6:13282647-13619628	6	0					4p16.3	0.030588	0.030084	chr4:1-1215099	26	0
	6q25.1	0.011134	0.15065	chr6:151897164-152013033	2	0					4q35.2	3.4456e-15	3.2702e-15	chr4:187179487-191154276	18	0
	6p12.1	0.097484	0.22897	chr6:52256619-54865051	24	0					5q21.3	0.0019151	0.014768	chr5:105881819-107071504	3	0
	8q24.21	2.4266e-48	4.5349e-39	chr8:128667886-128770551	1	0					5q11.2	1.0292e-07	9.0714e-07	chr5:55218677-56776810	11	0
	8p11.23	2.8257e-76	6.9283e-68	chr8:37492669-37566401	1	0					6p25.3	7.273e-05	7.215e-05	chr6:1-4710714	35	0
	8p11.21	1.2544e-25	7.3382e-05	chr8:42155813-42233447	3	0					6q27	9.4867e-20	3.603e-16	chr6:167553035-168862573	10	0
	8q22.1	1.933e-12	0.0045714	chr8:90690228-95556549	32	0					6q15	1.3829e-09	6.0065e-06	chr6:85471465-99284305	61	0
	10p15.1	0.05577	0.05577	chr10:5637943-5769826	3	0					7p22.3	3.5244e-05	3.4142e-05	chr7:1-1303032	15	0
	10q22.3	1.7334e-07	1.7334e-07	chr10:80467192-82012440	14	0					7q36.1	1.0002e-09	1.0346e-09	chr7:151817415-152136074	1	0
	11p13	0.001126	0.001126	chr11:33652461-33738048	3	0					8q24.3	0.084397	0.095486	chr8:136668530-146364022	118	0
	11q13.3	1.2921e-162	6.7872e-149	chr11:69475863-69487994	1	0					8p23.2	1.007e-28	5.4115e-28	chr8:2112968-4985851	3	0
	11q14.1	5.7083e-53	2.0362e-05	chr11:76991222-78030045	15	0					8p12	4.6326e-06	0.15556	chr8:30622058-36124333	19	0
	12p13.33	0.00064131	0.00064131	chr12:1-1078118	11	0					8p11.21	2.7572e-05	0.00063571	chr8:42883855-47750537	6	0
	12q15	6.9874e-14	6.9874e-14	chr12:69589834-69751498	2	0					9q34.3	0.013763	0.030084	chr9:140489638-141213431	7	0
	13q12.3	0.0037697	0.015982	chr13:30525220-31086572	5	0					9p21.3	5.0617e-22	5.5183e-16	chr9:21931610-22448737	3	0
	13q33.3	0.047372	0.24075	chr13:93635207-115169878	147	0					9q21.11	0.00075425	0.01586	chr9:38619152-71152237	57	0
	14q21.1	0.00053966	0.00053966	chr14:37963714-38073152	3	0					9p23	7.3503e-07	0.0022701	chr9:7887952-12687261	3	0
	15q26.3	4.7976e-12	4.7976e-12	chr15:99120042-99605978	3	0					10q26.3	1.2959e-07	0.00043318	chr10:131981403-135534747	31	0
	16q12.1	0.088917	0.088917	chr16:47853524-48057182	1	0					10q23.31	4.5971e-26	1.6953e-23	chr10:89615138-89755074	3	0
	17q12	1.065e-118	2.0678e-75	chr17:37833601-37876887	2	0					11p15.5	4.8254e-12	4.8254e-12	chr11:1-796553	36	1	EPS8L2
	17q23.1	6.2465e-53	5.3684e-33	chr17:57922443-57936913	1	0					11q23.2	1.9564e-15	3.3463e-07	chr11:106886059-118315445	115	0
	19q12	0.00040793	0.0033503	chr19:30072177-30511416	5	0					11q25	1.1703e-14	0.0092871	chr11:132204656-135006516	13	0
	19q13.42	0.00147	0.0029299	chr19:55779854-56309664	33	0					11q13.1	1.1097e-05	0.0011145	chr11:64573763-65684611	57	0
	20q13.2	6.832e-32	6.832e-32	chr20:52162398-52176913	1	0					12q24.33	0.00023347	0.031958	chr12:123758236-133851895	81	0
											12p13.1	0.024807	0.02442	chr12:12506852-13351669	17	0
											12q13.13	0.012287	0.16474	chr12:49075812-55415221	164	1	ZNF385A
											12q23.1	0.0031495	0.19234	chr12:99119269-100424312	3	0
											13q12.11	2.7071e-05	0.083249	chr13:1-19997431	8	0
											13q14.2	6.7967e-30	1.8149e-28	chr13:48875329-49064807	2	0
											14q24.3	4.4367e-08	4.5645e-08	chr14:68154106-85860867	146	2	KIAA0247, PGF
											15q13.1	1.2796e-13	1.2354e-13	chr15:28096454-31198928	34	0
											16q11.2	0.00061205	0.013848	chr16:31804435-46624790	27	0
											16q24.3	8.2844e-08	7.9338e-07	chr16:88525832-90354753	49	0
											17p13.3	0.025187	0.13275	chr17:1-1180022	15	0
											17p12	6.8874e-10	1.218e-08	chr17:11919496-12456081	2	0
											17q12	1.1414e-10	0.0006721	chr17:31957152-33257606	9	0
											17q21.31	1.9639e-12	3.3463e-07	chr17:41178765-41336147	2	0
											18q23	3.9259e-05	3.9243e-05	chr18:74335369-78077248	17	1	PARD6G
											19p13.3	2.0226e-28	2.0226e-28	chr19:1272041-1383689	3	0
											19q13.32	0.087352	0.087352	chr19:46913750-47835469	26	1	BBC3
											20p13	0.030576	0.030084	chr20:1-648944	16	0
											21q11.2	6.8997e-10	7.0989e-10	chr21:1-15447211	12	0

## Sheet: CESC
	CN gain										CN loss
	cytoband	q value	residual q value	wide peak boundaries	# of genes in the region	# of TP53 core genes in the region	TP53 core genes in the region				cytoband	q value	residual q value	wide peak boundaries	# of genes in the region	# of TP53 core genes in the region	TP53 core genes in the region
	3q28	0.0022578	0.0022578	chr3:165509242-198022430	250	1	ZMAT3				2q37.1	1.8044e-05	0.00010137	chr2:213401694-243199373	282	2	KLHL30, ABCA12
	7p11.2	0.043913	0.043913	chr7:55051332-55133002	1	0					11q25	0.00014817	0.00014817	chr11:106886059-135006516	287	1	EI24
	8q24.21	0.0078794	0.10519	chr8:128291579-128340373	1	0					10q23.31	0.012616	0.012616	chr10:89730648-90034038	1	0
	8q24.21	0.025031	0.07125	chr8:129029315-129031733	1	0					13q14.13	0.027513	0.027388	chr13:1-52436675	289	0
	9p24.1	0.012862	0.012862	chr9:5722416-5791681	2	0					11p15.5	0.038772	0.038772	chr11:1-3249828	91	1	EPS8L2
	11q22.1	4.4365e-06	5.4783e-05	chr11:101751242-102313399	9	0					19p13.3	0.038772	0.038772	chr19:970775-1056591	4	0
	11q13.3	0.0042482	0.0072441	chr11:69699947-70747182	7	0					4q35.1	0.044078	0.048224	chr4:179280062-191154276	66	0
	13q22.1	0.07125	0.07125	chr13:74176833-74221764	1	0					21q22.3	0.048224	0.048224	chr21:43185981-43303120	2	0
	16p13.2	0.058726	0.058726	chr16:8925727-10889443	14	0					3p12.1	0.054226	0.054226	chr3:59034763-93767487	88	0
	20q11.21	0.00021551	0.00021551	chr20:30034611-30077639	4	0					2q22.1	0.011171	0.068741	chr2:140708948-143637838	2	0
	21q22.2	0.083338	0.083338	chr21:39788697-40688364	6	0					1p36.22	0.072721	0.072721	chr1:1-224351022	2235	12	ATF3, PLK3, GADD45A, BTG2, PHLDA3, HES2, FAM212B, CDC42SE1, SESN2, WDR63, RNF19B, KLHDC7A
											3p22.1	0.083806	0.078987	chr3:41280645-41732267	1	0
											11q14.2	0.091926	0.091926	chr11:82995735-86015197	10	0

## Sheet: COADREAD
	CN gain										CN loss
	cytoband	q value	residual q value	wide peak boundaries	# of genes in the region	# of TP53 core genes in the region	TP53 core genes in the region				cytoband	q value	residual q value	wide peak boundaries	# of genes in the region	# of TP53 core genes in the region	TP53 core genes in the region
	5p13.1	0.045214	0.045214	chr5:33432238-44942400	72	0					1p13.2	0.00060246	0.014798	chr1:111737399-118152240	73	1	FAM212B
	6p21.1	0.00026808	0.00026808	chr6:41728699-44407505	72	2	POHL, TMEM63B				1p36.11	2.1371e-16	2.6094e-15	chr1:26917433-27220856	9	0
	8q24.21	1.6877e-07	1.6877e-07	chr8:128204396-128340373	2	0					1p33	1.0754e-12	3.2122e-10	chr1:49615826-50514967	1	0
	8p11.23	3.2978e-05	0.0025457	chr8:38144203-38243864	2	0					2q37.3	0.010591	0.010591	chr2:240963939-243199373	37	0
	8p11.21	3.4451e-06	0.0006867	chr8:41352076-41438745	3	0					2p12	0.02097	0.019766	chr2:76821134-79697981	8	0
	10q22.3	0.005393	0.005393	chr10:79553562-82903467	27	0					3p26.3	0.072138	0.17577	chr3:1-14530661	99	1	XPC
	11p15.5	1.6877e-07	1.6877e-07	chr11:2157956-2241271	4	0					3q26.31	5.9448e-10	5.9448e-10	chr3:174345545-175760559	3	0
	12p13.32	0.010004	0.010004	chr12:4452154-4616900	4	1	TIGAR				3p14.2	1.2514e-15	1.3706e-15	chr3:59702822-61547330	3	0
	13q12.13	2.8517e-08	0.00041647	chr13:27521847-27544633	1	0					4q35.1	6.1817e-10	8.26e-07	chr4:182755060-186321446	33	0
	13q12.2	5.2684e-07	0.0046233	chr13:27796966-29007729	19	0					4p16.1	0.0045472	0.004662	chr4:6193245-6322930	1	0
	13q22.1	0.0013411	0.0029423	chr13:73809522-73850003	1	0					4q22.1	8.4507e-31	2.4467e-29	chr4:91271445-93240505	1	0
	16p11.2	0.041352	0.045214	chr16:30641164-30696005	2	0					5q12.1	6.2666e-16	1.2514e-15	chr5:58998410-59780946	2	0
	17q12	2.2311e-13	5.1845e-12	chr17:37848534-37919695	5	0					5q21.1	0.0017618	0.010591	chr5:98261106-106712758	19	0
	17q24.1	0.0002533	0.0055818	chr17:63994689-64014950	1	0					6p25.3	2.4554e-07	2.3568e-07	chr6:1608837-2624052	2	0
	19q13.11	0.057368	0.057368	chr19:32416740-35608954	45	0					6q26	9.1823e-23	9.1823e-23	chr6:161693099-163153207	1	0
	20q11.21	0.0029423	0.0029423	chr20:30147146-30232288	4	0					7q31.1	8.1991e-05	8.1991e-05	chr7:110746146-111366370	1	0
	20q13.2	0.076082	0.076082	chr20:52055609-57706006	51	1	FAM210B				8p23.2	8.9503e-08	3.2531e-07	chr8:2112968-4985851	3	0
											8p12	0.026017	0.16217	chr8:33573524-36623303	3	0
											8q11.1	0.043525	0.044309	chr8:42883855-47750537	6	0
											10q25.2	0.00018454	0.041297	chr10:100989718-135534747	286	1	BLOC1S2
											10q21.1	2.8378e-10	7.0597e-10	chr10:53057593-53461574	2	0
											10q23.31	9.6235e-08	3.5071e-05	chr10:89506488-90034038	6	0
											11q22.3	0.0076966	0.024028	chr11:105849158-111340543	31	0
											12q21.33	0.048583	0.04733	chr12:91383361-91498710	1	0
											14q23.3	0.099301	0.097572	chr14:64801031-107349540	456	2	KIAA0247, PGF
											15q13.3	0.0033831	0.10842	chr15:1-44070690	247	0
											15q21.1	0.00014367	0.25892	chr15:1-48414549	286	0
											15q21.3	0.033806	0.10197	chr15:54050065-55474704	1	0
											15q22.33	7.7399e-05	8.1991e-05	chr15:67067796-67494822	1	0
											16p13.3	8.2924e-61	8.2924e-61	chr16:5144019-7780235	2	0
											16q23.1	3.6592e-15	3.6592e-15	chr16:78098006-79031486	1	0
											17p11.2	0.012223	0.012063	chr17:20483883-21031068	2	0
											18q21.2	4.4782e-08	3.5071e-05	chr18:48472083-48705371	3	0
											18q22.1	1.454e-05	0.0024431	chr18:65181982-66383463	1	0
											19p13.3	2.9792e-05	2.9792e-05	chr19:1507711-1867911	12	0
											20p12.1	1.973e-27	1.973e-27	chr20:14301156-15274325	2	0
											21q11.2	7.1231e-06	7.1231e-06	chr21:1-15594370	13	0
											22q13.32	0.001419	0.001419	chr22:48668761-51304566	42	0

## Sheet: GBM
	CN gain										CN loss
	cytoband	q value	residual q value	wide peak boundaries	# of genes in the region	# of TP53 core genes in the region	TP53 core genes in the region				cytoband	q value	residual q value	wide peak boundaries	# of genes in the region	# of TP53 core genes in the region	TP53 core genes in the region
	1p36.21	7.4396e-05	7.4396e-05	chr1:13862648-14358896	4	0					1q42.11	0.00555	0.071349	chr1:208416154-230886190	189	1	ATF3
	1q32.1	2.805e-43	2.805e-43	chr1:204457787-204488590	2	0					1q44	0.00028064	0.00093692	chr1:245868364-247052144	6	0
	1q44	2.8317e-05	2.8317e-05	chr1:243042268-244452765	6	0					1p32.3	2.557e-10	8.4909e-10	chr1:50879767-51529064	4	0
	2p24.3	4.961e-05	4.961e-05	chr2:16031028-16165425	4	0					1p36.23	8.7389e-38	3.5394e-37	chr1:8042737-8336254	2	0
	3q26.33	1.0371e-06	1.0371e-06	chr3:181124491-181295615	1	0					2q22.1	0.037279	0.03596	chr2:140708948-143637838	2	0
	4p16.3	0.00040239	0.00040239	chr4:1778797-1816689	2	0					2q37.1	0.0083509	0.0080909	chr2:233547367-233727481	2	0
	4q12	7.6649e-52	7.6649e-52	chr4:55004387-55115704	2	0					3q29	3.8197e-05	3.8622e-05	chr3:191046716-195873924	37	0
	7q31.2	0.063801	0.063801	chr7:116305774-116480275	2	0					4q34.3	1.2405e-05	0.00074235	chr4:179280062-182757119	4	0
	7p11.2	1.3931e-286	1.4927e-286	chr7:54986878-55016499	1	0					4q35.2	0.00033537	0.0095805	chr4:187652261-191154276	15	0
	7q21.2	0.0036164	0.0066205	chr7:92240329-92427373	1	0					5q34	0.044031	0.077953	chr5:161128762-167720464	9	1	CCNG1
	12p13.32	3.813e-10	3.813e-10	chr12:4385343-4414011	1	0					5q12.3	0.043203	0.06019	chr5:65522889-68667592	16	0
	12q14.1	1.2794e-83	3.4949e-66	chr12:58125396-58152580	3	0					6q22.31	0.0084195	0.06019	chr6:114662707-144166215	166	0
	12q15	1.0234e-38	2.6703e-16	chr12:69178021-69260755	3	1	MDM2				6q26	8.1544e-16	9.7854e-15	chr6:163736503-164264583	3	0
	21q21.1	0.049032	0.049032	chr21:17580707-17591447	1	0					6p12.3	0.070924	0.068133	chr6:44417483-52009599	42	0
											9p21.3	0	0	chr9:21626574-22448737	5	0
											10p15.3	0.020412	0.020531	chr10:1-688423	6	0
											10q26.3	8.1122e-19	6.8247e-18	chr10:135190263-135214343	1	0
											10q23.31	4.8846e-39	3.0616e-38	chr10:89617158-89755074	3	0
											11p15.5	0.027582	0.02716	chr11:1-6193448	178	1	EPS82L
											12p13.1	0.036426	0.03596	chr12:12844234-12880381	1	0
											12q15	0.013017	0.01882	chr12:66560880-69140499	14	0
											12q21.31	0.062099	0.099954	chr12:74934744-99123151	125	1	IKBIP
											13q14.2	5.4791e-06	5.4791e-06	chr13:48875329-49064807	2	0
											14q13.1	3.4309e-06	3.4309e-06	chr14:33297556-34394000	1	0
											15q14	1.2451e-06	1.2451e-06	chr15:31725571-42192039	109	0
											16p12.2	0.0037868	0.0037659	chr16:21310117-24269176	39	0
											16q12.1	0.068754	0.089749	chr16:47735031-58011449	96	0
											16q23.1	0.057396	0.076953	chr16:72021963-81773025	62	0
											17q11.2	0.00053211	0.00054798	chr17:29326736-29722618	5	0
											17p13.1	0.00074035	0.00074035	chr17:7535461-7593565	2	0
											18q22.3	0.058849	0.06019	chr18:67995567-74538817	23	0
											19q13.41	0.00010375	0.00010224	chr19:51485195-51878840	20	0
											22q13.32	0.0002506	0.00074235	chr22:42733844-51304566	105	0

## Sheet: HNSC
	CN gain										CN loss
	cytoband	q value	residual q value	wide peak boundaries	# of genes in the region	# of TP53 core genes in the region	TP53 core genes in the region				cytoband	q value	residual q value	wide peak boundaries	# of genes in the region	# of TP53 core genes in the region	TP53 core genes in the region
	1q21.2	0.064607	0.064607	chr1:120523956-149884926	76	0					1p13.1	9.5792e-10	2.6227e-09	chr1:113247128-149881397	143	0
	2q31.2	3.2757e-08	1.7189e-05	chr2:178072322-178219955	4	0					1p36.13	1.0629e-06	3.1549e-06	chr1:16398078-16525548	1	0
	2q32.2	1.1305e-05	0.026036	chr2:191251644-192458746	8	0					2q21.2	1.7507e-15	4.7808e-06	chr2:133423352-134161285	1	0
	2q11.2	6.5102e-06	4.7991e-05	chr2:97507482-97572142	4	0					2q22.1	5.6431e-30	1.4729e-20	chr2:140708948-143637838	2	0
	3q26.33	2.6437e-20	2.6437e-20	chr3:180929310-182508780	4	0					2q36.2	2.445e-18	7.2268e-11	chr2:215261791-243199373	279	2	ABCA12, KLHL30
	5p15.33	0.009325	0.026036	chr5:1287704-1415403	4	0					3p24.1	0.0063532	0.097602	chr3:30051218-30767809	2	0
	5p12	0.055926	0.092299	chr5:43797600-43829650	1	0					3p26.2	0.056063	0.17796	chr3:3220635-4535479	3	0
	6p12.1	0.00092602	0.0012222	chr6:53892031-54450993	2	0					3p14.3	0.0034474	0.20542	chr3:53923579-55500153	3	0
	6q12	0.0054009	0.0067302	chr6:64323655-64389055	1	0					3p14.2	4.7281e-05	0.0092411	chr3:61234833-62306281	1	0
	7p22.3	0.069851	0.1936	chr7:1-1256237	14	0					3p12.2	7.2599e-05	0.00098684	chr3:79814918-85012839	2	0
	7p11.2	1.055e-27	9.7985e-26	chr7:55063359-55324318	1	0					4q31.3	6.9107e-06	0.08946	chr4:151178502-152025968	6	0
	7q21.3	2.2204e-06	2.2204e-06	chr7:92946318-93138081	4	0					4q35.2	2.4128e-21	7.6224e-19	chr4:187475875-191154276	16	0
	8q24.21	2.6621e-09	6.7954e-09	chr8:128283183-128408535	1	0					4q22.1	0.00011721	0.0008136	chr4:91271445-93240505	1	0
	8p11.23	3.6138e-17	4.7092e-17	chr8:38147031-38251736	2	0					5q35.3	9.9585e-05	0.00015657	chr5:176521457-176731866	2	0
	8q11.21	0.0041805	0.027644	chr8:49265786-49937472	2	0					5q11.1	0.00085312	0.15795	chr5:44817857-50620778	4	0
	9p23	1.2988e-05	0.00089139	chr9:13618691-14321078	2	0					5q12.1	1.2553e-08	1.4263e-05	chr5:58151172-59780946	2	0
	9p13.3	9.4282e-12	5.1395e-11	chr9:35641860-35738892	11	0					5q15	4.1672e-05	0.012029	chr5:92929447-93956985	4	0
	9p24.1	0.00016033	0.021704	chr9:5421313-5618711	3	0					6p25.3	0.008905	0.0086345	chr6:1608837-2624052	2	0
	11p13	0.00027105	0.002487	chr11:35861175-35879772	1	0					7q31.1	0.00033381	0.0080723	chr7:110746146-111366370	1	0
	11p11.2	0.0020619	0.055926	chr11:44568825-45521687	5	1	CD82				7q36.1	2.7649e-09	6.2271e-08	chr7:151817415-152136074	1	0
	11q13.3	8.6734e-169	8.6734e-169	chr11:70072760-70111860	1	0					7q11.22	0.019163	0.13023	chr7:69000716-70601215	2	0
	12q15	2.8763e-08	2.8763e-08	chr12:69356672-69804210	5	0					8p23.2	7.5695e-57	7.5695e-57	chr8:3548028-4251283	2	0
	12p13.33	0.009325	0.009325	chr12:915771-1064437	2	0					9q34.3	5.2529e-05	5.386e-05	chr9:139376600-139456211	4	0
	13q22.1	2.1818e-08	2.1818e-08	chr13:73880414-73990612	1	0					9p21.3	1.7665e-127	2.2497e-117	chr9:21931610-22003135	2	0
	14q11.2	0.046831	0.046831	chr14:21338460-21711097	16	0					9q21.11	3.1397e-05	0.0086345	chr9:38619152-71152237	57	0
	15q26.3	0.051212	0.051212	chr15:95914475-101083104	26	0					9p23	6.0466e-21	4.0113e-09	chr9:8885227-12687261	2	0
	17q12	2.8714e-05	2.8714e-05	chr17:37765176-37959597	11	0					10p11.21	4.5405e-08	4.7851e-08	chr10:34059131-35328087	1	0
	18q11.2	1.0592e-07	1.3769e-07	chr18:20875568-20896050	1	0					10q22.2	0.051968	0.20542	chr10:75894405-76587720	1	0
	18p11.31	0.0010754	0.0010754	chr18:3306279-3610409	5	0					10q23.31	0.0028849	0.042731	chr10:89506488-90348818	7	0
	20q11.22	1.0733e-06	1.0733e-06	chr20:32055126-32514060	8	0					11q23.1	3.6906e-11	1.4117e-09	chr11:108811192-116715687	74	0
											11q14.1	0.0022228	0.021358	chr11:78285273-81604120	4	0
											13q12.11	4.9074e-11	1.8393e-07	chr13:20734421-22372868	25	0
											13q14.2	3.7597e-07	0.00010219	chr13:48666829-49563699	7	0
											14q11.2	0.00061003	0.0013807	chr14:1-30047530	271	0
											14q32.32	0.0019802	0.0086345	chr14:103192370-103566784	4	0
											15q15.1	0.051914	0.051897	chr15:1-45317914	263	0
											16q23.3	2.2587e-07	2.1818e-07	chr16:82873004-83542835	2	0
											17q25.3	0.00022091	0.00021061	chr17:80698053-80902410	2	0
											18q21.2	4.0892e-06	0.046783	chr18:48350340-49074805	6	0
											18q23	2.657e-14	3.4518e-12	chr18:74335369-78077248	17	1	PARD6G
											19p13.3	2.5068e-12	2.5068e-12	chr19:284019-538315	8	0
											19q13.43	0.010447	0.0098709	chr19:57746073-58597404	37	0
											22q13.31	0.085502	0.08946	chr22:45095899-51304566	73	0

## Sheet: KIRC
	CN gain										CN loss
	cytoband	q value	residual q value	wide peak boundaries	# of genes in the region	# of TP53 core genes in the region	TP53 core genes in the region				cytoband	q value	residual q value	wide peak boundaries	# of genes in the region	# of TP53 core genes in the region	TP53 core genes in the region
	1q23.2	0.070029	0.070029	chr1:120523956-176170942	587	1	CDC42SE1				1q44	0.00062271	0.47155	chr1:1-249250621	706	12	BTG2, HES2, FAM212B, WDR63, PHLDA3, ATF3, KLHDC7A, PLK3, SESN2, RNF19B, CDC42SE1, GADD45A
	1q32.1	0.0014162	0.0014162	chr1:204821214-204852892	1	0					1p36.22	1.1007e-10	0.00040959	chr1:1-28984838	489	3	HES2, KLHDC7A, SESN2
	3q26.32	0.00092628	0.00092628	chr3:177793108-179141923	9	1	ZMAT3				1p35.3	2.3505e-06	0.013421	chr1:15439256-33941004	332	3	KLHDC7A, SESN2, RNF19B
	4q32.1	0.096222	0.096222	chr4:158682488-161247218	11	0					1q41	0.0091422	0.2118	chr1:207911606-249250621	358	1	ATF3
	4q12	0.039838	0.039838	chr4:55158352-55159526	2	0					1q42.3	0.0017266	0.17739	chr1:208081981-249250621	353	1	ATF3
	5q21.1	0.00071705	0.032384	chr5:102054422-102986652	5	0					1p31.1	2.1587e-07	5.71e-07	chr1:71540450-73657665	2	0
	5q21.3	0.0014162	0.24092	chr5:106680850-106781231	1	0					1p36.13	1.8815e-10	0.0049089	chr1:7829287-28984838	372	2	KLHDC7A, SESN2
	5q35.3	2.824e-16	2.824e-16	chr5:175113540-180915260	104	0					2q37.3	6.9946e-15	6.9946e-15	chr2:240317967-243199373	39	0
	5q15	0.00085037	0.04279	chr5:93959843-94454730	2	0					3p25.3	1.0827e-08	2.3505e-06	chr3:11303687-11603208	1	0
	7q36.3	0.017624	0.017624	chr7:154970910-155403167	5	0					3p21.1	7.9517e-10	0.00014863	chr3:52578475-52727256	7	0
	8q24.22	0.011906	0.011906	chr8:118576475-146364022	217	0					3p14.3	2.0285e-07	0.0092098	chr3:56712869-57129222	2	0
	9p24.1	0.034293	0.034293	chr9:5037462-5234141	3	0					3p14.2	0.00010982	0.025758	chr3:58651854-65340907	20	0
	14q13.2	0.073948	0.073948	chr14:35048643-37404863	24	0					3p14.1	0.00014863	0.17739	chr3:64670406-66121046	1	0
	15q26.1	0.073948	0.073948	chr15:90158145-90997428	26	0					3p14.1	0.0001029	0.08788	chr3:67698816-71005520	12	0
	17q12	0.048795	0.048795	chr17:35894871-36410732	5	0					3p12.3	2.9423e-08	3.933e-06	chr3:75363575-78166985	9	0
											3p12.1	0.00033441	0.0092098	chr3:79814918-86177974	5	0
											3p11.1	0.018084	0.1535	chr3:87036916-88044123	5	0
											3q11.2	0.00032757	0.00032757	chr3:96336219-97484651	1	0
											4q24	0.067322	0.065819	chr4:104020947-106965832	11	0
											4q34.3	0.0024965	0.0024608	chr4:178750047-182757119	5	0
											6q27	0.00062271	0.13367	chr6:136607456-171115067	201	0
											6q26	0.00012268	0.12868	chr6:161693099-163153207	1	0
											6q26	2.7439e-06	0.0010735	chr6:163833536-164264583	3	0
											6q15	0.026634	0.055074	chr6:88214299-88301289	1	0
											8p23.2	0.0043725	0.0043725	chr8:2112968-4985851	3	0
											9p21.3	8.1568e-18	8.5677e-15	chr9:21931610-22448737	3	0
											9p23	1.4944e-12	7.7115e-11	chr9:8885227-12687261	2	0
											10q26.2	0.0076318	0.0076318	chr10:122359096-131266433	54	0
											10q23.31	0.0015227	0.0016177	chr10:89617158-89755074	3	0
											13q13.3	0.034534	0.034718	chr13:1-61260454	326	0
											14q31.1	0.0095512	0.0092098	chr14:78640552-80663955	2	0

## Sheet: KIRP
	CN gain										CN loss
	cytoband	q value	residual q value	wide peak boundaries	# of genes in the region	# of TP53 core genes in the region	TP53 core genes in the region				cytoband	q value	residual q value	wide peak boundaries	# of genes in the region	# of TP53 core genes in the region	TP53 core genes in the region
	none significant										1p36.31	0.0029124	0.0029124	chr1:6222647-6281666	2	0
											2q37.3	0.015124	0.015124	chr2:218618816-243199373	259	1	KLHL30
											4q32.1	0.067587	1	chr4:1-191154276	729	0
											4q32.1	0.067587	0.10712	chr4:101103211-178388431	317	0
											5q12.1	0.029127	0.029127	chr5:58151172-60047770	5	0
											6q26	0.098781	0.091283	chr6:161693099-163153207	1	0
											9p21.3	8.4293e-14	8.4293e-14	chr9:21626574-22448737	5	0

## Sheet: LAML
	CN gain										CN loss
	cytoband	q value	residual q value	wide peak boundaries	# of genes in the region	# of TP53 core genes in the region	TP53 core genes in the region				cytoband	q value	residual q value	wide peak boundaries	# of genes in the region	# of TP53 core genes in the region	TP53 core genes in the region
	11q23.3	1.8522e-08	1.8522e-08	chr11:118341650-118354357	1	0					3p13	0.023982	0.026353	chr3:70016017-74313374	17	0
	21q22.2	1.8522e-08	1.8522e-08	chr21:39698056-40187752	3	0					7q36.2	0.0014062	0.0014062	chr7:154874918-155090518	1	0
											7p12.1	0.088206	0.086146	chr7:50632522-51004541	2	0
											12p13.2	0.0011984	0.0011984	chr12:11415451-13525906	26	0
											12q13.11	0.088498	0.086146	chr12:46382613-48368988	15	0
											16q23.1	0.069959	0.069959	chr16:73174324-78134454	36	0
											17q11.2	0.00046579	0.00046579	chr17:29596666-29652455	3	0
											17p13.2	0.044137	0.044429	chr17:3588456-3718856	2	0
											18p11.21	0.0093719	0.00956	chr18:12531263-12789058	3	0

[truncated: 10 more sheets: LGG, LUAD, LUSC, OV, PAAD, PRAD, SKCM, STAD, THCA, UCEC]
